# Supplementary material for: Sustainable Metabolic Engineering Design Development Employing a Complex Objective Function
Source: Preprints.org preprint supplement (doi:10.20944/preprints202305.0094.v1), 2023-05-03
Supplement: Supplementary file 3 [file supplementary]

Archive with 3 entries (3 files):
- Supplementary materials/S1.xlsx
- Supplementary materials/S2.xlsx
- Supplementary materials/S3.mat
