# Supplementary material for: Sustainable Metabolic Engineering Design Development Employing a Complex Objective Function
Source: Preprints.org preprint supplement (doi:10.20944/preprints202305.0094.v1), 2023-05-03
Supplement: Supplementary file 3 [file supplementary › Supplementary materials/S1.xlsx]

## Sheet: Top 1000 designs
Rank	Fitness Score	Product	Product flux (mmol/gDW/h	Substrate flux (mmol/gDW/h2	Maximal growth rate (1/h)	Nr of deletions	Minimal ISS at max growth (1e-4 USD/gDW/h)	Minimal ISS at 0 growth (1e-4 USD/gDW/h)	Economic SI at max growth (1e-4 USD/gDW/h)	Environmental SI at max growth (1e-4 USD/gDW/h)2	Social SI at max growth (1e-4 USD/gDW/h)	Gene deletions	Deleted reactions
1	-55.8261	EX_succ_e	10.8056	-10	0.0694611	3	31.7019	-5.75177	27.0716	-3.75903	8.38941	b2415, b3737, b1380	2DGLCptspp, ACGAptspp, ACMANAptspp, ACMUMptspp, ARBTptspp, ASCBptspp, ATPS4rpp, CELBpts, CHTBSptspp, DHAPT, FRUpts2pp, FRUptspp, GALTptspp, GAMptspp, GLCptspp, LDH_D, MALTptspp, MANGLYCptspp, MANptspp, MNLptspp, SBTptspp, SUCptspp, TREptspp
2	-55.8261	EX_succ_e	10.8056	-10	0.0694611	3	31.7019	-5.75177	27.0716	-3.75903	8.38941	b2415, b3732, b1380	2DGLCptspp, ACGAptspp, ACMANAptspp, ACMUMptspp, ARBTptspp, ASCBptspp, ATPS4rpp, CELBpts, CHTBSptspp, DHAPT, FRUpts2pp, FRUptspp, GALTptspp, GAMptspp, GLCptspp, LDH_D, MALTptspp, MANGLYCptspp, MANptspp, MNLptspp, SBTptspp, SUCptspp, TREptspp
3	-55.8261	EX_succ_e	10.8056	-10	0.0694611	3	31.7019	-5.75177	27.0716	-3.75903	8.38941	b2415, b3736, b1380	2DGLCptspp, ACGAptspp, ACMANAptspp, ACMUMptspp, ARBTptspp, ASCBptspp, ATPS4rpp, CELBpts, CHTBSptspp, DHAPT, FRUpts2pp, FRUptspp, GALTptspp, GAMptspp, GLCptspp, LDH_D, MALTptspp, MANGLYCptspp, MANptspp, MNLptspp, SBTptspp, SUCptspp, TREptspp
4	-55.8261	EX_succ_e	10.8056	-10	0.0694611	3	31.7019	-5.75177	27.0716	-3.75903	8.38941	b2415, b3731, b1380	2DGLCptspp, ACGAptspp, ACMANAptspp, ACMUMptspp, ARBTptspp, ASCBptspp, ATPS4rpp, CELBpts, CHTBSptspp, DHAPT, FRUpts2pp, FRUptspp, GALTptspp, GAMptspp, GLCptspp, LDH_D, MALTptspp, MANGLYCptspp, MANptspp, MNLptspp, SBTptspp, SUCptspp, TREptspp
5	-55.8261	EX_succ_e	10.8056	-10	0.0694611	3	31.7019	-5.75177	27.0716	-3.75903	8.38941	b2415, b3733, b1380	2DGLCptspp, ACGAptspp, ACMANAptspp, ACMUMptspp, ARBTptspp, ASCBptspp, ATPS4rpp, CELBpts, CHTBSptspp, DHAPT, FRUpts2pp, FRUptspp, GALTptspp, GAMptspp, GLCptspp, LDH_D, MALTptspp, MANGLYCptspp, MANptspp, MNLptspp, SBTptspp, SUCptspp, TREptspp
6	-55.8261	EX_succ_e	10.8056	-10	0.0694611	3	31.7019	-5.75177	27.0716	-3.75903	8.38941	b2415, b3734, b1380	2DGLCptspp, ACGAptspp, ACMANAptspp, ACMUMptspp, ARBTptspp, ASCBptspp, ATPS4rpp, CELBpts, CHTBSptspp, DHAPT, FRUpts2pp, FRUptspp, GALTptspp, GAMptspp, GLCptspp, LDH_D, MALTptspp, MANGLYCptspp, MANptspp, MNLptspp, SBTptspp, SUCptspp, TREptspp
7	-55.8261	EX_succ_e	10.8056	-10	0.0694611	3	31.7019	-5.75177	27.0716	-3.75903	8.38941	b2415, b3735, b1380	2DGLCptspp, ACGAptspp, ACMANAptspp, ACMUMptspp, ARBTptspp, ASCBptspp, ATPS4rpp, CELBpts, CHTBSptspp, DHAPT, FRUpts2pp, FRUptspp, GALTptspp, GAMptspp, GLCptspp, LDH_D, MALTptspp, MANGLYCptspp, MANptspp, MNLptspp, SBTptspp, SUCptspp, TREptspp
8	-55.8261	EX_succ_e	10.8056	-10	0.0694611	3	31.7019	-5.75177	27.0716	-3.75903	8.38941	b2415, b3738, b1380	2DGLCptspp, ACGAptspp, ACMANAptspp, ACMUMptspp, ARBTptspp, ASCBptspp, ATPS4rpp, CELBpts, CHTBSptspp, DHAPT, FRUpts2pp, FRUptspp, GALTptspp, GAMptspp, GLCptspp, LDH_D, MALTptspp, MANGLYCptspp, MANptspp, MNLptspp, SBTptspp, SUCptspp, TREptspp
9	-55.1651	EX_succ_e	10.8056	-10	0.0694611	4	31.7019	-5.07369	27.0716	-3.75903	8.38941	b2415, b3732, b1380, b1771	2DGLCptspp, ACGAptspp, ACMANAptspp, ACMUMptspp, ALR2x, ARBTptspp, ASCBptspp, ATPS4rpp, CELBpts, CHTBSptspp, DHAPT, FRUpts2pp, FRUptspp, GALTptspp, GAMptspp, GLCptspp, LDH_D, MALTptspp, MANGLYCptspp, MANptspp, MNLptspp, SBTptspp, SUCptspp, TREptspp
10	-55.1651	EX_succ_e	10.8056	-10	0.0694611	4	31.7019	-5.07369	27.0716	-3.75903	8.38941	b2415, b3736, b1380, b1771	2DGLCptspp, ACGAptspp, ACMANAptspp, ACMUMptspp, ALR2x, ARBTptspp, ASCBptspp, ATPS4rpp, CELBpts, CHTBSptspp, DHAPT, FRUpts2pp, FRUptspp, GALTptspp, GAMptspp, GLCptspp, LDH_D, MALTptspp, MANGLYCptspp, MANptspp, MNLptspp, SBTptspp, SUCptspp, TREptspp
11	-55.1651	EX_succ_e	10.8056	-10	0.0694611	4	31.7019	-5.07369	27.0716	-3.75903	8.38941	b2415, b3945, b3736, b1380	2DGLCptspp, ACGAptspp, ACMANAptspp, ACMUMptspp, ALR4x, APPLDHr, ARBTptspp, ASCBptspp, ATPS4rpp, CELBpts, CHTBSptspp, DHAPT, FRUpts2pp, FRUptspp, GALTptspp, GAMptspp, GLCptspp, GLYCDx, LALDO2x, LDH_D, MALTptspp, MANGLYCptspp, MANptspp, MNLptspp, SBTptspp, SUCptspp, TREptspp
12	-55.1651	EX_succ_e	10.8056	-10	0.0694611	4	31.7019	-5.07369	27.0716	-3.75903	8.38941	b2415, b3945, b3732, b1380	2DGLCptspp, ACGAptspp, ACMANAptspp, ACMUMptspp, ALR4x, APPLDHr, ARBTptspp, ASCBptspp, ATPS4rpp, CELBpts, CHTBSptspp, DHAPT, FRUpts2pp, FRUptspp, GALTptspp, GAMptspp, GLCptspp, GLYCDx, LALDO2x, LDH_D, MALTptspp, MANGLYCptspp, MANptspp, MNLptspp, SBTptspp, SUCptspp, TREptspp
13	-55.1651	EX_succ_e	10.8056	-10	0.0694611	4	31.7019	-5.07369	27.0716	-3.75903	8.38941	b0963, b2415, b3732, b1380	2DGLCptspp, ACGAptspp, ACMANAptspp, ACMUMptspp, ARBTptspp, ASCBptspp, ATPS4rpp, CELBpts, CHTBSptspp, DHAPT, FRUpts2pp, FRUptspp, GALTptspp, GAMptspp, GLCptspp, LDH_D, MALTptspp, MANGLYCptspp, MANptspp, MGSA, MNLptspp, SBTptspp, SUCptspp, TREptspp
14	-55.1651	EX_succ_e	10.8056	-10	0.0694611	4	31.7019	-5.07369	27.0716	-3.75903	8.38941	b0963, b2415, b3736, b1380	2DGLCptspp, ACGAptspp, ACMANAptspp, ACMUMptspp, ARBTptspp, ASCBptspp, ATPS4rpp, CELBpts, CHTBSptspp, DHAPT, FRUpts2pp, FRUptspp, GALTptspp, GAMptspp, GLCptspp, LDH_D, MALTptspp, MANGLYCptspp, MANptspp, MGSA, MNLptspp, SBTptspp, SUCptspp, TREptspp
15	-54.8475	EX_succ_e	10.8056	-10	0.0694612	4	31.702	-5.70894	27.0716	-3.75904	8.38943	b2415, b2223, b3732, b1380	2DGLCptspp, ACACt2pp, ACGAptspp, ACMANAptspp, ACMUMptspp, ARBTptspp, ASCBptspp, ATPS4rpp, BUTt2rpp, CELBpts, CHTBSptspp, DHAPT, FRUpts2pp, FRUptspp, GALTptspp, GAMptspp, GLCptspp, HEXt2rpp, LDH_D, MALTptspp, MANGLYCptspp, MANptspp, MNLptspp, SBTptspp, SUCptspp, TREptspp
16	-54.8475	EX_succ_e	10.8056	-10	0.0694612	4	31.702	-5.70894	27.0716	-3.75904	8.38943	b2415, b2223, b3736, b1380	2DGLCptspp, ACACt2pp, ACGAptspp, ACMANAptspp, ACMUMptspp, ARBTptspp, ASCBptspp, ATPS4rpp, BUTt2rpp, CELBpts, CHTBSptspp, DHAPT, FRUpts2pp, FRUptspp, GALTptspp, GAMptspp, GLCptspp, HEXt2rpp, LDH_D, MALTptspp, MANGLYCptspp, MANptspp, MNLptspp, SBTptspp, SUCptspp, TREptspp
17	-54.8462	EX_succ_e	10.7957	-10	0.068608	4	31.7007	-5.70894	27.0662	-3.75432	8.38878	b3844, b2415, b3732, b1380	2DGLCptspp, ACGAptspp, ACMANAptspp, ACMUMptspp, ARBTptspp, ASCBptspp, ATPS4rpp, CELBpts, CHTBSptspp, DHAPT, FADRx, FE3Ri, FLVRx, FRUpts2pp, FRUptspp, GALTptspp, GAMptspp, GLCptspp, LDH_D, MALTptspp, MANGLYCptspp, MANptspp, MNLptspp, SBTptspp, SUCptspp, TREptspp
18	-54.8462	EX_succ_e	10.7957	-10	0.068608	4	31.7007	-5.70894	27.0662	-3.75432	8.38878	b3844, b2415, b3736, b1380	2DGLCptspp, ACGAptspp, ACMANAptspp, ACMUMptspp, ARBTptspp, ASCBptspp, ATPS4rpp, CELBpts, CHTBSptspp, DHAPT, FADRx, FE3Ri, FLVRx, FRUpts2pp, FRUptspp, GALTptspp, GAMptspp, GLCptspp, LDH_D, MALTptspp, MANGLYCptspp, MANptspp, MNLptspp, SBTptspp, SUCptspp, TREptspp
19	-54.8266	EX_succ_e	10.8057	-10	0.0694603	4	31.7025	-5.75177	27.072	-3.7591	8.38955	b2415, b3736, b1380, b0155	2DGLCptspp, ACGAptspp, ACMANAptspp, ACMUMptspp, ARBTptspp, ASCBptspp, ATPS4rpp, CELBpts, CHTBSptspp, CLt3_2pp, DHAPT, FRUpts2pp, FRUptspp, GALTptspp, GAMptspp, GLCptspp, LDH_D, MALTptspp, MANGLYCptspp, MANptspp, MNLptspp, SBTptspp, SUCptspp, TREptspp
20	-54.8261	EX_succ_e	10.8056	-10	0.0694611	4	31.7019	-5.75177	27.0716	-3.75903	8.38941	b2415, b4239, b3732, b1380	2DGLCptspp, ACGAptspp, ACMANAptspp, ACMUMptspp, ARBTptspp, ASCBptspp, ATPS4rpp, CELBpts, CHTBSptspp, DHAPT, FRUpts2pp, FRUptspp, GALTptspp, GAMptspp, GLCptspp, LDH_D, MALTptspp, MANGLYCptspp, MANptspp, MNLptspp, SBTptspp, SUCptspp, TRE6PH, TREptspp
21	-54.8261	EX_succ_e	10.8056	-10	0.0694611	4	31.7019	-5.75177	27.0716	-3.75903	8.38941	b2415, b4239, b3736, b1380	2DGLCptspp, ACGAptspp, ACMANAptspp, ACMUMptspp, ARBTptspp, ASCBptspp, ATPS4rpp, CELBpts, CHTBSptspp, DHAPT, FRUpts2pp, FRUptspp, GALTptspp, GAMptspp, GLCptspp, LDH_D, MALTptspp, MANGLYCptspp, MANptspp, MNLptspp, SBTptspp, SUCptspp, TRE6PH, TREptspp
22	-54.8261	EX_succ_e	10.8056	-10	0.0694611	4	31.7019	-5.75177	27.0716	-3.75903	8.38941	b2415, b3732, b3650, b1380	2DGLCptspp, ACGAptspp, ACMANAptspp, ACMUMptspp, ARBTptspp, ASCBptspp, ATPS4rpp, CELBpts, CHTBSptspp, DHAPT, FRUpts2pp, FRUptspp, GALTptspp, GAMptspp, GDPTPDP, GLCptspp, LDH_D, MALTptspp, MANGLYCptspp, MANptspp, MNLptspp, PPGPPDP, SBTptspp, SUCptspp, TREptspp
23	-54.8261	EX_succ_e	10.8056	-10	0.0694611	4	31.7019	-5.75177	27.0716	-3.75903	8.38941	b2415, b3736, b3650, b1380	2DGLCptspp, ACGAptspp, ACMANAptspp, ACMUMptspp, ARBTptspp, ASCBptspp, ATPS4rpp, CELBpts, CHTBSptspp, DHAPT, FRUpts2pp, FRUptspp, GALTptspp, GAMptspp, GDPTPDP, GLCptspp, LDH_D, MALTptspp, MANGLYCptspp, MANptspp, MNLptspp, PPGPPDP, SBTptspp, SUCptspp, TREptspp
24	-54.8261	EX_succ_e	10.8056	-10	0.0694611	4	31.7019	-5.75177	27.0716	-3.75903	8.38941	b2415, b3732, b0585, b1380	2DGLCptspp, ACGAptspp, ACMANAptspp, ACMUMptspp, ARBTptspp, ASCBptspp, ATPS4rpp, CELBpts, CHTBSptspp, DHAPT, ENTERES, FEENTERES, FRUpts2pp, FRUptspp, GALTptspp, GAMptspp, GLCptspp, LDH_D, MALTptspp, MANGLYCptspp, MANptspp, MNLptspp, SBTptspp, SUCptspp, TREptspp
25	-54.8261	EX_succ_e	10.8056	-10	0.0694611	4	31.7019	-5.75177	27.0716	-3.75903	8.38941	b2415, b3736, b0585, b1380	2DGLCptspp, ACGAptspp, ACMANAptspp, ACMUMptspp, ARBTptspp, ASCBptspp, ATPS4rpp, CELBpts, CHTBSptspp, DHAPT, ENTERES, FEENTERES, FRUpts2pp, FRUptspp, GALTptspp, GAMptspp, GLCptspp, LDH_D, MALTptspp, MANGLYCptspp, MANptspp, MNLptspp, SBTptspp, SUCptspp, TREptspp
26	-54.8261	EX_succ_e	10.8056	-10	0.0694611	4	31.7019	-5.75177	27.0716	-3.75903	8.38941	b2415, b3732, b4094, b1380	2DGLCptspp, ACGAptspp, ACMANAptspp, ACMUMptspp, ARBTptspp, ASCBptspp, ATPS4rpp, CELBpts, CHTBSptspp, DHAPT, FRUpts2pp, FRUptspp, GALTptspp, GAMptspp, GLCptspp, LDH_D, MALTptspp, MANGLYCptspp, MANptspp, MNLptspp, R15BPK, SBTptspp, SUCptspp, TREptspp
27	-54.8261	EX_succ_e	10.8056	-10	0.0694611	4	31.7019	-5.75177	27.0716	-3.75903	8.38941	b2415, b3736, b4094, b1380	2DGLCptspp, ACGAptspp, ACMANAptspp, ACMUMptspp, ARBTptspp, ASCBptspp, ATPS4rpp, CELBpts, CHTBSptspp, DHAPT, FRUpts2pp, FRUptspp, GALTptspp, GAMptspp, GLCptspp, LDH_D, MALTptspp, MANGLYCptspp, MANptspp, MNLptspp, R15BPK, SBTptspp, SUCptspp, TREptspp
28	-54.8261	EX_succ_e	10.8056	-10	0.0694611	4	31.7019	-5.75177	27.0716	-3.75903	8.38941	b2415, b2663, b3736, b1380	2DGLCptspp, ABUTt2pp, ACGAptspp, ACMANAptspp, ACMUMptspp, ARBTptspp, ASCBptspp, ATPS4rpp, CELBpts, CHTBSptspp, DHAPT, FRUpts2pp, FRUptspp, GALTptspp, GAMptspp, GLCptspp, LDH_D, MALTptspp, MANGLYCptspp, MANptspp, MNLptspp, SBTptspp, SUCptspp, TREptspp
29	-54.8261	EX_succ_e	10.8056	-10	0.0694611	4	31.7019	-5.75177	27.0716	-3.75903	8.38941	b2415, b2663, b3732, b1380	2DGLCptspp, ABUTt2pp, ACGAptspp, ACMANAptspp, ACMUMptspp, ARBTptspp, ASCBptspp, ATPS4rpp, CELBpts, CHTBSptspp, DHAPT, FRUpts2pp, FRUptspp, GALTptspp, GAMptspp, GLCptspp, LDH_D, MALTptspp, MANGLYCptspp, MANptspp, MNLptspp, SBTptspp, SUCptspp, TREptspp
30	-54.8261	EX_succ_e	10.8056	-10	0.0694611	4	31.7019	-5.75177	27.0716	-3.75903	8.38941	b2415, b1857, b3736, b1380	2DGLCptspp, ACGAptspp, ACMANAptspp, ACMUMptspp, ARBTptspp, ASCBptspp, ATPS4rpp, CELBpts, CHTBSptspp, DHAPT, FRUpts2pp, FRUptspp, GALTptspp, GAMptspp, GLCptspp, LDH_D, MALTptspp, MANGLYCptspp, MANptspp, MNLptspp, SBTptspp, SUCptspp, TREptspp, ZNabcpp
31	-54.8261	EX_succ_e	10.8056	-10	0.0694611	4	31.7019	-5.75177	27.0716	-3.75903	8.38941	b2415, b1859, b3736, b1380	2DGLCptspp, ACGAptspp, ACMANAptspp, ACMUMptspp, ARBTptspp, ASCBptspp, ATPS4rpp, CELBpts, CHTBSptspp, DHAPT, FRUpts2pp, FRUptspp, GALTptspp, GAMptspp, GLCptspp, LDH_D, MALTptspp, MANGLYCptspp, MANptspp, MNLptspp, SBTptspp, SUCptspp, TREptspp, ZNabcpp
32	-54.8261	EX_succ_e	10.8056	-10	0.0694611	4	31.7019	-5.75177	27.0716	-3.75903	8.38941	b2415, b1858, b3732, b1380	2DGLCptspp, ACGAptspp, ACMANAptspp, ACMUMptspp, ARBTptspp, ASCBptspp, ATPS4rpp, CELBpts, CHTBSptspp, DHAPT, FRUpts2pp, FRUptspp, GALTptspp, GAMptspp, GLCptspp, LDH_D, MALTptspp, MANGLYCptspp, MANptspp, MNLptspp, SBTptspp, SUCptspp, TREptspp, ZNabcpp
33	-54.8261	EX_succ_e	10.8056	-10	0.0694611	4	31.7019	-5.75177	27.0716	-3.75903	8.38941	b2415, b1858, b3736, b1380	2DGLCptspp, ACGAptspp, ACMANAptspp, ACMUMptspp, ARBTptspp, ASCBptspp, ATPS4rpp, CELBpts, CHTBSptspp, DHAPT, FRUpts2pp, FRUptspp, GALTptspp, GAMptspp, GLCptspp, LDH_D, MALTptspp, MANGLYCptspp, MANptspp, MNLptspp, SBTptspp, SUCptspp, TREptspp, ZNabcpp
34	-54.8261	EX_succ_e	10.8056	-10	0.0694611	4	31.7019	-5.75177	27.0716	-3.75903	8.38941	b2415, b1857, b3732, b1380	2DGLCptspp, ACGAptspp, ACMANAptspp, ACMUMptspp, ARBTptspp, ASCBptspp, ATPS4rpp, CELBpts, CHTBSptspp, DHAPT, FRUpts2pp, FRUptspp, GALTptspp, GAMptspp, GLCptspp, LDH_D, MALTptspp, MANGLYCptspp, MANptspp, MNLptspp, SBTptspp, SUCptspp, TREptspp, ZNabcpp
35	-54.8261	EX_succ_e	10.8056	-10	0.0694611	4	31.7019	-5.75177	27.0716	-3.75903	8.38941	b2415, b1859, b3732, b1380	2DGLCptspp, ACGAptspp, ACMANAptspp, ACMUMptspp, ARBTptspp, ASCBptspp, ATPS4rpp, CELBpts, CHTBSptspp, DHAPT, FRUpts2pp, FRUptspp, GALTptspp, GAMptspp, GLCptspp, LDH_D, MALTptspp, MANGLYCptspp, MANptspp, MNLptspp, SBTptspp, SUCptspp, TREptspp, ZNabcpp
36	-54.8261	EX_succ_e	10.8056	-10	0.0694611	4	31.7019	-5.75177	27.0716	-3.75903	8.38941	b2415, b0978, b3732, b1380	2DGLCptspp, ACGAptspp, ACMANAptspp, ACMUMptspp, ARBTptspp, ASCBptspp, ATPS4rpp, CELBpts, CHTBSptspp, CYTBD2pp, DHAPT, FRUpts2pp, FRUptspp, GALTptspp, GAMptspp, GLCptspp, LDH_D, MALTptspp, MANGLYCptspp, MANptspp, MNLptspp, SBTptspp, SUCptspp, TREptspp
37	-54.8261	EX_succ_e	10.8056	-10	0.0694611	4	31.7019	-5.75177	27.0716	-3.75903	8.38941	b2415, b0978, b3736, b1380	2DGLCptspp, ACGAptspp, ACMANAptspp, ACMUMptspp, ARBTptspp, ASCBptspp, ATPS4rpp, CELBpts, CHTBSptspp, CYTBD2pp, DHAPT, FRUpts2pp, FRUptspp, GALTptspp, GAMptspp, GLCptspp, LDH_D, MALTptspp, MANGLYCptspp, MANptspp, MNLptspp, SBTptspp, SUCptspp, TREptspp
38	-54.8261	EX_succ_e	10.8056	-10	0.0694611	4	31.7019	-5.75177	27.0716	-3.75903	8.38941	b2415, b0979, b3732, b1380	2DGLCptspp, ACGAptspp, ACMANAptspp, ACMUMptspp, ARBTptspp, ASCBptspp, ATPS4rpp, CELBpts, CHTBSptspp, CYTBD2pp, DHAPT, FRUpts2pp, FRUptspp, GALTptspp, GAMptspp, GLCptspp, LDH_D, MALTptspp, MANGLYCptspp, MANptspp, MNLptspp, SBTptspp, SUCptspp, TREptspp
39	-54.8261	EX_succ_e	10.8056	-10	0.0694611	4	31.7019	-5.75177	27.0716	-3.75903	8.38941	b2415, b0979, b3736, b1380	2DGLCptspp, ACGAptspp, ACMANAptspp, ACMUMptspp, ARBTptspp, ASCBptspp, ATPS4rpp, CELBpts, CHTBSptspp, CYTBD2pp, DHAPT, FRUpts2pp, FRUptspp, GALTptspp, GAMptspp, GLCptspp, LDH_D, MALTptspp, MANGLYCptspp, MANptspp, MNLptspp, SBTptspp, SUCptspp, TREptspp
40	-54.8261	EX_succ_e	10.8056	-10	0.0694611	4	31.7019	-5.75177	27.0716	-3.75903	8.38941	b2415, b3732, b1380, b3924	2DGLCptspp, ACGAptspp, ACMANAptspp, ACMUMptspp, ARBTptspp, ASCBptspp, ATPS4rpp, CELBpts, CHTBSptspp, DHAPT, FLDR2, FRUpts2pp, FRUptspp, GALTptspp, GAMptspp, GLCptspp, LDH_D, MALTptspp, MANGLYCptspp, MANptspp, MNLptspp, SBTptspp, SUCptspp, TREptspp
41	-54.8261	EX_succ_e	10.8056	-10	0.0694611	4	31.7019	-5.75177	27.0716	-3.75903	8.38941	b2415, b3736, b1380, b3924	2DGLCptspp, ACGAptspp, ACMANAptspp, ACMUMptspp, ARBTptspp, ASCBptspp, ATPS4rpp, CELBpts, CHTBSptspp, DHAPT, FLDR2, FRUpts2pp, FRUptspp, GALTptspp, GAMptspp, GLCptspp, LDH_D, MALTptspp, MANGLYCptspp, MANptspp, MNLptspp, SBTptspp, SUCptspp, TREptspp
42	-54.8261	EX_succ_e	10.8056	-10	0.0694611	4	31.7019	-5.75177	27.0716	-3.75903	8.38941	b2415, b3736, b1380, b2309	2DGLCptspp, ACGAptspp, ACMANAptspp, ACMUMptspp, ARBTptspp, ASCBptspp, ATPS4rpp, CELBpts, CHTBSptspp, DHAPT, FRUpts2pp, FRUptspp, GALTptspp, GAMptspp, GLCptspp, HISabcpp, LDH_D, MALTptspp, MANGLYCptspp, MANptspp, MNLptspp, SBTptspp, SUCptspp, TREptspp
43	-54.8261	EX_succ_e	10.8056	-10	0.0694611	4	31.7019	-5.75177	27.0716	-3.75903	8.38941	b2415, b3732, b1380, b2309	2DGLCptspp, ACGAptspp, ACMANAptspp, ACMUMptspp, ARBTptspp, ASCBptspp, ATPS4rpp, CELBpts, CHTBSptspp, DHAPT, FRUpts2pp, FRUptspp, GALTptspp, GAMptspp, GLCptspp, HISabcpp, LDH_D, MALTptspp, MANGLYCptspp, MANptspp, MNLptspp, SBTptspp, SUCptspp, TREptspp
44	-54.8261	EX_succ_e	10.8056	-10	0.0694611	4	31.7019	-5.75177	27.0716	-3.75903	8.38941	b2415, b3449, b3732, b1380	2DGLCptspp, ACGAptspp, ACMANAptspp, ACMUMptspp, ARBTptspp, ASCBptspp, ATPS4rpp, CELBpts, CHTBSptspp, DHAPT, FRUpts2pp, FRUptspp, GALTptspp, GAMptspp, GLCptspp, GPDDA1, GPDDA2, GPDDA3, GPDDA4, GPDDA5, LDH_D, MALTptspp, MANGLYCptspp, MANptspp, MNLptspp, SBTptspp, SUCptspp, TREptspp
45	-54.8261	EX_succ_e	10.8056	-10	0.0694611	4	31.7019	-5.75177	27.0716	-3.75903	8.38941	b2415, b3449, b3736, b1380	2DGLCptspp, ACGAptspp, ACMANAptspp, ACMUMptspp, ARBTptspp, ASCBptspp, ATPS4rpp, CELBpts, CHTBSptspp, DHAPT, FRUpts2pp, FRUptspp, GALTptspp, GAMptspp, GLCptspp, GPDDA1, GPDDA2, GPDDA3, GPDDA4, GPDDA5, LDH_D, MALTptspp, MANGLYCptspp, MANptspp, MNLptspp, SBTptspp, SUCptspp, TREptspp
46	-54.8261	EX_succ_e	10.8056	-10	0.0694611	4	31.7019	-5.75177	27.0716	-3.75903	8.38941	b2415, b3732, b1380, b0463	2DGLCptspp, ACGAptspp, ACMANAptspp, ACMUMptspp, ARBTptspp, ASCBptspp, ATPS4rpp, CELBpts, CHTBSptspp, CMtpp, DHAPT, DOXRBCNtpp, FRUpts2pp, FRUptspp, FUSAtpp, GALTptspp, GAMptspp, GLCptspp, LDH_D, MALTptspp, MANGLYCptspp, MANptspp, MINCYCtpp, MNLptspp, NOVBCNtpp, RFAMPtpp, SBTptspp, SUCptspp, TREptspp, TTRCYCtpp
47	-54.8261	EX_succ_e	10.8056	-10	0.0694611	4	31.7019	-5.75177	27.0716	-3.75903	8.38941	b2415, b3736, b1380, b0463	2DGLCptspp, ACGAptspp, ACMANAptspp, ACMUMptspp, ARBTptspp, ASCBptspp, ATPS4rpp, CELBpts, CHTBSptspp, CMtpp, DHAPT, DOXRBCNtpp, FRUpts2pp, FRUptspp, FUSAtpp, GALTptspp, GAMptspp, GLCptspp, LDH_D, MALTptspp, MANGLYCptspp, MANptspp, MINCYCtpp, MNLptspp, NOVBCNtpp, RFAMPtpp, SBTptspp, SUCptspp, TREptspp, TTRCYCtpp
48	-54.8261	EX_succ_e	10.8056	-10	0.0694611	4	31.7019	-5.75177	27.0716	-3.75903	8.38941	b2415, b3736, b1380, b0515	2DGLCptspp, ACGAptspp, ACMANAptspp, ACMUMptspp, ARBTptspp, ASCBptspp, ATPS4rpp, CELBpts, CHTBSptspp, DHAPT, FRUpts2pp, FRUptspp, GALTptspp, GAMptspp, GLCptspp, LDH_D, MALTptspp, MANGLYCptspp, MANptspp, MNLptspp, SBTptspp, SUCptspp, TREptspp, UGCIAMH
49	-54.8261	EX_succ_e	10.8056	-10	0.0694611	4	31.7019	-5.75177	27.0716	-3.75903	8.38941	b2415, b3732, b1380, b0516	2DGLCptspp, ACGAptspp, ACMANAptspp, ACMUMptspp, ALLTAMH2, ARBTptspp, ASCBptspp, ATPS4rpp, CELBpts, CHTBSptspp, DHAPT, FRUpts2pp, FRUptspp, GALTptspp, GAMptspp, GLCptspp, LDH_D, MALTptspp, MANGLYCptspp, MANptspp, MNLptspp, SBTptspp, SUCptspp, TREptspp
50	-54.8261	EX_succ_e	10.8056	-10	0.0694611	4	31.7019	-5.75177	27.0716	-3.75903	8.38941	b0512, b2415, b3732, b1380	2DGLCptspp, ACGAptspp, ACMANAptspp, ACMUMptspp, ALLTN, ARBTptspp, ASCBptspp, ATPS4rpp, CELBpts, CHTBSptspp, DHAPT, FRUpts2pp, FRUptspp, GALTptspp, GAMptspp, GLCptspp, LDH_D, MALTptspp, MANGLYCptspp, MANptspp, MNLptspp, SBTptspp, SUCptspp, TREptspp
51	-54.8261	EX_succ_e	10.8056	-10	0.0694611	4	31.7019	-5.75177	27.0716	-3.75903	8.38941	b2415, b3736, b1380, b0516	2DGLCptspp, ACGAptspp, ACMANAptspp, ACMUMptspp, ALLTAMH2, ARBTptspp, ASCBptspp, ATPS4rpp, CELBpts, CHTBSptspp, DHAPT, FRUpts2pp, FRUptspp, GALTptspp, GAMptspp, GLCptspp, LDH_D, MALTptspp, MANGLYCptspp, MANptspp, MNLptspp, SBTptspp, SUCptspp, TREptspp
52	-54.8261	EX_succ_e	10.8056	-10	0.0694611	4	31.7019	-5.75177	27.0716	-3.75903	8.38941	b0512, b2415, b3736, b1380	2DGLCptspp, ACGAptspp, ACMANAptspp, ACMUMptspp, ALLTN, ARBTptspp, ASCBptspp, ATPS4rpp, CELBpts, CHTBSptspp, DHAPT, FRUpts2pp, FRUptspp, GALTptspp, GAMptspp, GLCptspp, LDH_D, MALTptspp, MANGLYCptspp, MANptspp, MNLptspp, SBTptspp, SUCptspp, TREptspp
53	-54.8261	EX_succ_e	10.8056	-10	0.0694611	4	31.7019	-5.75177	27.0716	-3.75903	8.38941	b2415, b3732, b1380, b0515	2DGLCptspp, ACGAptspp, ACMANAptspp, ACMUMptspp, ARBTptspp, ASCBptspp, ATPS4rpp, CELBpts, CHTBSptspp, DHAPT, FRUpts2pp, FRUptspp, GALTptspp, GAMptspp, GLCptspp, LDH_D, MALTptspp, MANGLYCptspp, MANptspp, MNLptspp, SBTptspp, SUCptspp, TREptspp, UGCIAMH
54	-54.8261	EX_succ_e	10.8056	-10	0.0694611	4	31.7019	-5.75177	27.0716	-3.75903	8.38941	b2415, b3732, b1119, b1380	2DGLCptspp, ACGAMK, ACGAptspp, ACMANAptspp, ACMUMptspp, ARBTptspp, ASCBptspp, ATPS4rpp, CELBpts, CHTBSptspp, DHAPT, FRUpts2pp, FRUptspp, GALTptspp, GAMptspp, GLCptspp, LDH_D, MALTptspp, MANGLYCptspp, MANptspp, MNLptspp, SBTptspp, SUCptspp, TREptspp
55	-54.8261	EX_succ_e	10.8056	-10	0.0694611	4	31.7019	-5.75177	27.0716	-3.75903	8.38941	b2415, b3736, b1119, b1380	2DGLCptspp, ACGAMK, ACGAptspp, ACMANAptspp, ACMUMptspp, ARBTptspp, ASCBptspp, ATPS4rpp, CELBpts, CHTBSptspp, DHAPT, FRUpts2pp, FRUptspp, GALTptspp, GAMptspp, GLCptspp, LDH_D, MALTptspp, MANGLYCptspp, MANptspp, MNLptspp, SBTptspp, SUCptspp, TREptspp
56	-54.8261	EX_succ_e	10.8056	-10	0.0694611	4	31.7019	-5.75177	27.0716	-3.75903	8.38941	b2415, b0433, b3732, b1380	2DGLCptspp, ACGAptspp, ACMANAptspp, ACMUMptspp, AGM3Pt2pp, AGM4Pt2pp, AGMt2pp, ARBTptspp, ASCBptspp, ATPS4rpp, CELBpts, CHTBSptspp, DHAPT, FRUpts2pp, FRUptspp, GALTptspp, GAMptspp, GLCptspp, LDH_D, MALTptspp, MANGLYCptspp, MANptspp, MNLptspp, SBTptspp, SUCptspp, TREptspp
57	-54.8261	EX_succ_e	10.8056	-10	0.0694611	4	31.7019	-5.75177	27.0716	-3.75903	8.38941	b2415, b3732, b1640, b1380	2DGLCptspp, ACGAptspp, ACMANAptspp, ACMUMptspp, ANHMK, ARBTptspp, ASCBptspp, ATPS4rpp, CELBpts, CHTBSptspp, DHAPT, FRUpts2pp, FRUptspp, GALTptspp, GAMptspp, GLCptspp, LDH_D, MALTptspp, MANGLYCptspp, MANptspp, MNLptspp, SBTptspp, SUCptspp, TREptspp
58	-54.8261	EX_succ_e	10.8056	-10	0.0694611	4	31.7019	-5.75177	27.0716	-3.75903	8.38941	b2428, b2415, b3732, b1380	2DGLCptspp, ACGAptspp, ACM6PH, ACMANAptspp, ACMUMptspp, ARBTptspp, ASCBptspp, ATPS4rpp, CELBpts, CHTBSptspp, DHAPT, FRUpts2pp, FRUptspp, GALTptspp, GAMptspp, GLCptspp, LDH_D, MALTptspp, MANGLYCptspp, MANptspp, MNLptspp, SBTptspp, SUCptspp, TREptspp
59	-54.8261	EX_succ_e	10.8056	-10	0.0694611	4	31.7019	-5.75177	27.0716	-3.75903	8.38941	b2415, b0433, b3736, b1380	2DGLCptspp, ACGAptspp, ACMANAptspp, ACMUMptspp, AGM3Pt2pp, AGM4Pt2pp, AGMt2pp, ARBTptspp, ASCBptspp, ATPS4rpp, CELBpts, CHTBSptspp, DHAPT, FRUpts2pp, FRUptspp, GALTptspp, GAMptspp, GLCptspp, LDH_D, MALTptspp, MANGLYCptspp, MANptspp, MNLptspp, SBTptspp, SUCptspp, TREptspp
60	-54.8261	EX_succ_e	10.8056	-10	0.0694611	4	31.7019	-5.75177	27.0716	-3.75903	8.38941	b2415, b3736, b1640, b1380	2DGLCptspp, ACGAptspp, ACMANAptspp, ACMUMptspp, ANHMK, ARBTptspp, ASCBptspp, ATPS4rpp, CELBpts, CHTBSptspp, DHAPT, FRUpts2pp, FRUptspp, GALTptspp, GAMptspp, GLCptspp, LDH_D, MALTptspp, MANGLYCptspp, MANptspp, MNLptspp, SBTptspp, SUCptspp, TREptspp
61	-54.8261	EX_succ_e	10.8056	-10	0.0694611	4	31.7019	-5.75177	27.0716	-3.75903	8.38941	b2415, b0677, b3732, b1380	2DGLCptspp, ACGAptspp, ACMANAptspp, ACMUMptspp, AGDC, ARBTptspp, ASCBptspp, ATPS4rpp, CELBpts, CHTBSptspp, DHAPT, FRUpts2pp, FRUptspp, GALTptspp, GAMptspp, GLCptspp, LDH_D, MALTptspp, MANGLYCptspp, MANptspp, MNLptspp, SBTptspp, SUCptspp, TREptspp
62	-54.8261	EX_succ_e	10.8056	-10	0.0694611	4	31.7019	-5.75177	27.0716	-3.75903	8.38941	b2415, b3732, b1107, b1380	2DGLCptspp, ACGAptspp, ACMANAptspp, ACMUMptspp, AGM3PH, AGM4PH, AGMH, ARBTptspp, ASCBptspp, ATPS4rpp, CELBpts, CHTBSptspp, DHAPT, FRUpts2pp, FRUptspp, GALTptspp, GAMptspp, GLCptspp, LDH_D, MALTptspp, MANGLYCptspp, MANptspp, MNLptspp, SBTptspp, SUCptspp, TREptspp
63	-54.8261	EX_succ_e	10.8056	-10	0.0694611	4	31.7019	-5.75177	27.0716	-3.75903	8.38941	b2415, b0677, b3736, b1380	2DGLCptspp, ACGAptspp, ACMANAptspp, ACMUMptspp, AGDC, ARBTptspp, ASCBptspp, ATPS4rpp, CELBpts, CHTBSptspp, DHAPT, FRUpts2pp, FRUptspp, GALTptspp, GAMptspp, GLCptspp, LDH_D, MALTptspp, MANGLYCptspp, MANptspp, MNLptspp, SBTptspp, SUCptspp, TREptspp
64	-54.8261	EX_succ_e	10.8056	-10	0.0694611	4	31.7019	-5.75177	27.0716	-3.75903	8.38941	b2415, b3736, b1107, b1380	2DGLCptspp, ACGAptspp, ACMANAptspp, ACMUMptspp, AGM3PH, AGM4PH, AGMH, ARBTptspp, ASCBptspp, ATPS4rpp, CELBpts, CHTBSptspp, DHAPT, FRUpts2pp, FRUptspp, GALTptspp, GAMptspp, GLCptspp, LDH_D, MALTptspp, MANGLYCptspp, MANptspp, MNLptspp, SBTptspp, SUCptspp, TREptspp
65	-54.8261	EX_succ_e	10.8056	-10	0.0694611	4	31.7019	-5.75177	27.0716	-3.75903	8.38941	b2415, b3732, b1380, b3546	2DGLCptspp, ACGAptspp, ACMANAptspp, ACMUMptspp, ARBTptspp, ASCBptspp, ATPS4rpp, CELBpts, CHTBSptspp, DHAPT, FRUpts2pp, FRUptspp, GALTptspp, GAMptspp, GLCptspp, LDH_D, MALTptspp, MANGLYCptspp, MANptspp, MNLptspp, PETNT161pp, PETNT181pp, SBTptspp, SUCptspp, TREptspp
66	-54.8261	EX_succ_e	10.8056	-10	0.0694611	4	31.7019	-5.75177	27.0716	-3.75903	8.38941	b2415, b3736, b1380, b3546	2DGLCptspp, ACGAptspp, ACMANAptspp, ACMUMptspp, ARBTptspp, ASCBptspp, ATPS4rpp, CELBpts, CHTBSptspp, DHAPT, FRUpts2pp, FRUptspp, GALTptspp, GAMptspp, GLCptspp, LDH_D, MALTptspp, MANGLYCptspp, MANptspp, MNLptspp, PETNT161pp, PETNT181pp, SBTptspp, SUCptspp, TREptspp
67	-54.8261	EX_succ_e	10.8056	-10	0.0694611	4	31.7019	-5.75177	27.0716	-3.75903	8.38941	b2415, b0674, b3732, b1380	2DGLCptspp, ACGAptspp, ACMANAptspp, ACMUMptspp, ARBTptspp, ASCBptspp, ASNS1, ATPS4rpp, CELBpts, CHTBSptspp, DHAPT, FRUpts2pp, FRUptspp, GALTptspp, GAMptspp, GLCptspp, LDH_D, MALTptspp, MANGLYCptspp, MANptspp, MNLptspp, SBTptspp, SUCptspp, TREptspp
68	-54.8261	EX_succ_e	10.8056	-10	0.0694611	4	31.7019	-5.75177	27.0716	-3.75903	8.38941	b2415, b0674, b3736, b1380	2DGLCptspp, ACGAptspp, ACMANAptspp, ACMUMptspp, ARBTptspp, ASCBptspp, ASNS1, ATPS4rpp, CELBpts, CHTBSptspp, DHAPT, FRUpts2pp, FRUptspp, GALTptspp, GAMptspp, GLCptspp, LDH_D, MALTptspp, MANGLYCptspp, MANptspp, MNLptspp, SBTptspp, SUCptspp, TREptspp
69	-54.8261	EX_succ_e	10.8056	-10	0.0694611	4	31.7019	-5.75177	27.0716	-3.75903	8.38941	b2415, b3732, b1533, b1380	2DGLCptspp, ACGAptspp, ACMANAptspp, ACMUMptspp, ARBTptspp, ASCBptspp, ATPS4rpp, CELBpts, CHTBSptspp, DHAPT, FRUpts2pp, FRUptspp, GALTptspp, GAMptspp, GLCptspp, LDH_D, MALTptspp, MANGLYCptspp, MANptspp, MNLptspp, SBTptspp, SERtpp, SUCptspp, TREptspp
70	-54.8261	EX_succ_e	10.8056	-10	0.0694611	4	31.7019	-5.75177	27.0716	-3.75903	8.38941	b2415, b3736, b1533, b1380	2DGLCptspp, ACGAptspp, ACMANAptspp, ACMUMptspp, ARBTptspp, ASCBptspp, ATPS4rpp, CELBpts, CHTBSptspp, DHAPT, FRUpts2pp, FRUptspp, GALTptspp, GAMptspp, GLCptspp, LDH_D, MALTptspp, MANGLYCptspp, MANptspp, MNLptspp, SBTptspp, SERtpp, SUCptspp, TREptspp
71	-54.8261	EX_succ_e	10.8056	-10	0.0694611	4	31.7019	-5.75177	27.0716	-3.75903	8.38941	b3092, b2415, b3736, b1380	2DGLCptspp, ACGAptspp, ACMANAptspp, ACMUMptspp, ARBTptspp, ASCBptspp, ATPS4rpp, CELBpts, CHTBSptspp, DHAPT, FRUpts2pp, FRUptspp, GALTptspp, GAMptspp, GLCptspp, GUI1, GUI2, LDH_D, MALTptspp, MANGLYCptspp, MANptspp, MNLptspp, SBTptspp, SUCptspp, TREptspp
72	-54.8261	EX_succ_e	10.8056	-10	0.0694611	4	31.7019	-5.75177	27.0716	-3.75903	8.38941	b3092, b2415, b3732, b1380	2DGLCptspp, ACGAptspp, ACMANAptspp, ACMUMptspp, ARBTptspp, ASCBptspp, ATPS4rpp, CELBpts, CHTBSptspp, DHAPT, FRUpts2pp, FRUptspp, GALTptspp, GAMptspp, GLCptspp, GUI1, GUI2, LDH_D, MALTptspp, MANGLYCptspp, MANptspp, MNLptspp, SBTptspp, SUCptspp, TREptspp
73	-54.8261	EX_succ_e	10.8056	-10	0.0694611	4	31.7019	-5.75177	27.0716	-3.75903	8.38941	b2415, b3732, b1380, b1600	2DGLCptspp, ACGAptspp, ACMANAptspp, ACMUMptspp, ARBTptspp, ASCBptspp, ATPS4rpp, CELBpts, CHTBSptspp, DHAPT, FRUpts2pp, FRUptspp, GALTptspp, GAMptspp, GLCptspp, LDH_D, MALTptspp, MANGLYCptspp, MANptspp, MNLptspp, SBTptspp, SPMDt3pp, SUCptspp, TREptspp
74	-54.8261	EX_succ_e	10.8056	-10	0.0694611	4	31.7019	-5.75177	27.0716	-3.75903	8.38941	b2415, b3736, b1380, b1600	2DGLCptspp, ACGAptspp, ACMANAptspp, ACMUMptspp, ARBTptspp, ASCBptspp, ATPS4rpp, CELBpts, CHTBSptspp, DHAPT, FRUpts2pp, FRUptspp, GALTptspp, GAMptspp, GLCptspp, LDH_D, MALTptspp, MANGLYCptspp, MANptspp, MNLptspp, SBTptspp, SPMDt3pp, SUCptspp, TREptspp
75	-54.8261	EX_succ_e	10.8056	-10	0.0694611	4	31.7019	-5.75177	27.0716	-3.75903	8.38941	b2415, b3732, b1380, b1599	2DGLCptspp, ACGAptspp, ACMANAptspp, ACMUMptspp, ARBTptspp, ASCBptspp, ATPS4rpp, CELBpts, CHTBSptspp, DHAPT, FRUpts2pp, FRUptspp, GALTptspp, GAMptspp, GLCptspp, LDH_D, MALTptspp, MANGLYCptspp, MANptspp, MNLptspp, SBTptspp, SPMDt3pp, SUCptspp, TREptspp
76	-54.8261	EX_succ_e	10.8056	-10	0.0694611	4	31.7019	-5.75177	27.0716	-3.75903	8.38941	b2415, b3457, b3732, b1380	2DGLCptspp, ACGAptspp, ACMANAptspp, ACMUMptspp, ALAabcpp, ARBTptspp, ASCBptspp, ATPS4rpp, CELBpts, CHTBSptspp, DHAPT, FRUpts2pp, FRUptspp, GALTptspp, GAMptspp, GLCptspp, ILEabcpp, LDH_D, LEUabcpp, MALTptspp, MANGLYCptspp, MANptspp, MNLptspp, SBTptspp, SUCptspp, THRabcpp, TREptspp, VALabcpp
77	-54.8261	EX_succ_e	10.8056	-10	0.0694611	4	31.7019	-5.75177	27.0716	-3.75903	8.38941	b2415, b3456, b3736, b1380	2DGLCptspp, ACGAptspp, ACMANAptspp, ACMUMptspp, ALAabcpp, ARBTptspp, ASCBptspp, ATPS4rpp, CELBpts, CHTBSptspp, DHAPT, FRUpts2pp, FRUptspp, GALTptspp, GAMptspp, GLCptspp, ILEabcpp, LDH_D, LEUabcpp, MALTptspp, MANGLYCptspp, MANptspp, MNLptspp, SBTptspp, SUCptspp, THRabcpp, TREptspp, VALabcpp
78	-54.8261	EX_succ_e	10.8056	-10	0.0694611	4	31.7019	-5.75177	27.0716	-3.75903	8.38941	b2415, b3457, b3736, b1380	2DGLCptspp, ACGAptspp, ACMANAptspp, ACMUMptspp, ALAabcpp, ARBTptspp, ASCBptspp, ATPS4rpp, CELBpts, CHTBSptspp, DHAPT, FRUpts2pp, FRUptspp, GALTptspp, GAMptspp, GLCptspp, ILEabcpp, LDH_D, LEUabcpp, MALTptspp, MANGLYCptspp, MANptspp, MNLptspp, SBTptspp, SUCptspp, THRabcpp, TREptspp, VALabcpp
79	-54.8261	EX_succ_e	10.8056	-10	0.0694611	4	31.7019	-5.75177	27.0716	-3.75903	8.38941	b2415, b3455, b3732, b1380	2DGLCptspp, ACGAptspp, ACMANAptspp, ACMUMptspp, ALAabcpp, ARBTptspp, ASCBptspp, ATPS4rpp, CELBpts, CHTBSptspp, DHAPT, FRUpts2pp, FRUptspp, GALTptspp, GAMptspp, GLCptspp, ILEabcpp, LDH_D, LEUabcpp, MALTptspp, MANGLYCptspp, MANptspp, MNLptspp, SBTptspp, SUCptspp, THRabcpp, TREptspp, VALabcpp
80	-54.8261	EX_succ_e	10.8056	-10	0.0694611	4	31.7019	-5.75177	27.0716	-3.75903	8.38941	b2415, b3454, b3732, b1380	2DGLCptspp, ACGAptspp, ACMANAptspp, ACMUMptspp, ALAabcpp, ARBTptspp, ASCBptspp, ATPS4rpp, CELBpts, CHTBSptspp, DHAPT, FRUpts2pp, FRUptspp, GALTptspp, GAMptspp, GLCptspp, ILEabcpp, LDH_D, LEUabcpp, MALTptspp, MANGLYCptspp, MANptspp, MNLptspp, SBTptspp, SUCptspp, THRabcpp, TREptspp, VALabcpp
81	-54.8261	EX_succ_e	10.8056	-10	0.0694611	4	31.7019	-5.75177	27.0716	-3.75903	8.38941	b2415, b3456, b3732, b1380	2DGLCptspp, ACGAptspp, ACMANAptspp, ACMUMptspp, ALAabcpp, ARBTptspp, ASCBptspp, ATPS4rpp, CELBpts, CHTBSptspp, DHAPT, FRUpts2pp, FRUptspp, GALTptspp, GAMptspp, GLCptspp, ILEabcpp, LDH_D, LEUabcpp, MALTptspp, MANGLYCptspp, MANptspp, MNLptspp, SBTptspp, SUCptspp, THRabcpp, TREptspp, VALabcpp
82	-54.8261	EX_succ_e	10.8056	-10	0.0694611	4	31.7019	-5.75177	27.0716	-3.75903	8.38941	b2415, b3455, b3736, b1380	2DGLCptspp, ACGAptspp, ACMANAptspp, ACMUMptspp, ALAabcpp, ARBTptspp, ASCBptspp, ATPS4rpp, CELBpts, CHTBSptspp, DHAPT, FRUpts2pp, FRUptspp, GALTptspp, GAMptspp, GLCptspp, ILEabcpp, LDH_D, LEUabcpp, MALTptspp, MANGLYCptspp, MANptspp, MNLptspp, SBTptspp, SUCptspp, THRabcpp, TREptspp, VALabcpp
83	-54.8261	EX_succ_e	10.8056	-10	0.0694611	4	31.7019	-5.75177	27.0716	-3.75903	8.38941	b2415, b3454, b3736, b1380	2DGLCptspp, ACGAptspp, ACMANAptspp, ACMUMptspp, ALAabcpp, ARBTptspp, ASCBptspp, ATPS4rpp, CELBpts, CHTBSptspp, DHAPT, FRUpts2pp, FRUptspp, GALTptspp, GAMptspp, GLCptspp, ILEabcpp, LDH_D, LEUabcpp, MALTptspp, MANGLYCptspp, MANptspp, MNLptspp, SBTptspp, SUCptspp, THRabcpp, TREptspp, VALabcpp
84	-54.8261	EX_succ_e	10.8056	-10	0.0694611	4	31.7019	-5.75177	27.0716	-3.75903	8.38941	b2415, b1453, b3736, b1380	2DGLCptspp, ACGAptspp, ACMANAptspp, ACMUMptspp, ARBTptspp, ASCBptspp, ASNt2rpp, ATPS4rpp, CELBpts, CHTBSptspp, DHAPT, FRUpts2pp, FRUptspp, GALTptspp, GAMptspp, GLCptspp, LDH_D, MALTptspp, MANGLYCptspp, MANptspp, MNLptspp, SBTptspp, SUCptspp, TREptspp
85	-54.8261	EX_succ_e	10.8056	-10	0.0694611	4	31.7019	-5.75177	27.0716	-3.75903	8.38941	b2415, b3732, b3265, b1380	2DGLCptspp, ACGAptspp, ACMANAptspp, ACMUMptspp, ARBTptspp, ASCBptspp, ATPS4rpp, CELBpts, CHTBSptspp, DHAPT, FRUpts2pp, FRUptspp, GALTptspp, GAMptspp, GLCptspp, INDOLEt2pp, LDH_D, MALTptspp, MANGLYCptspp, MANptspp, MNLptspp, SBTptspp, SUCptspp, TREptspp
86	-54.8261	EX_succ_e	10.8056	-10	0.0694611	4	31.7019	-5.75177	27.0716	-3.75903	8.38941	b2415, b3736, b3266, b1380	2DGLCptspp, ACGAptspp, ACMANAptspp, ACMUMptspp, ARBTptspp, ASCBptspp, ATPS4rpp, CELBpts, CHTBSptspp, DHAPT, FRUpts2pp, FRUptspp, GALTptspp, GAMptspp, GLCptspp, INDOLEt2pp, LDH_D, MALTptspp, MANGLYCptspp, MANptspp, MNLptspp, SBTptspp, SUCptspp, TREptspp
87	-54.8261	EX_succ_e	10.8056	-10	0.0694611	4	31.7019	-5.75177	27.0716	-3.75903	8.38941	b2415, b3732, b3266, b1380	2DGLCptspp, ACGAptspp, ACMANAptspp, ACMUMptspp, ARBTptspp, ASCBptspp, ATPS4rpp, CELBpts, CHTBSptspp, DHAPT, FRUpts2pp, FRUptspp, GALTptspp, GAMptspp, GLCptspp, INDOLEt2pp, LDH_D, MALTptspp, MANGLYCptspp, MANptspp, MNLptspp, SBTptspp, SUCptspp, TREptspp
88	-54.8261	EX_succ_e	10.8056	-10	0.0694611	4	31.7019	-5.75177	27.0716	-3.75903	8.38941	b0033, b2415, b3732, b1380	2DGLCptspp, ACGAptspp, ACMANAptspp, ACMUMptspp, ARBTptspp, ASCBptspp, ATPS4rpp, CBPS, CELBpts, CHTBSptspp, DHAPT, FRUpts2pp, FRUptspp, GALTptspp, GAMptspp, GLCptspp, LDH_D, MALTptspp, MANGLYCptspp, MANptspp, MNLptspp, SBTptspp, SUCptspp, TREptspp
89	-54.8261	EX_succ_e	10.8056	-10	0.0694611	4	31.7019	-5.75177	27.0716	-3.75903	8.38941	b0032, b2415, b3732, b1380	2DGLCptspp, ACGAptspp, ACMANAptspp, ACMUMptspp, ARBTptspp, ASCBptspp, ATPS4rpp, CBPS, CELBpts, CHTBSptspp, DHAPT, FRUpts2pp, FRUptspp, GALTptspp, GAMptspp, GLCptspp, LDH_D, MALTptspp, MANGLYCptspp, MANptspp, MNLptspp, SBTptspp, SUCptspp, TREptspp
90	-54.8261	EX_succ_e	10.8056	-10	0.0694611	4	31.7019	-5.75177	27.0716	-3.75903	8.38941	b0033, b2415, b3736, b1380	2DGLCptspp, ACGAptspp, ACMANAptspp, ACMUMptspp, ARBTptspp, ASCBptspp, ATPS4rpp, CBPS, CELBpts, CHTBSptspp, DHAPT, FRUpts2pp, FRUptspp, GALTptspp, GAMptspp, GLCptspp, LDH_D, MALTptspp, MANGLYCptspp, MANptspp, MNLptspp, SBTptspp, SUCptspp, TREptspp
91	-54.8261	EX_succ_e	10.8056	-10	0.0694611	4	31.7019	-5.75177	27.0716	-3.75903	8.38941	b0032, b2415, b3736, b1380	2DGLCptspp, ACGAptspp, ACMANAptspp, ACMUMptspp, ARBTptspp, ASCBptspp, ATPS4rpp, CBPS, CELBpts, CHTBSptspp, DHAPT, FRUpts2pp, FRUptspp, GALTptspp, GAMptspp, GLCptspp, LDH_D, MALTptspp, MANGLYCptspp, MANptspp, MNLptspp, SBTptspp, SUCptspp, TREptspp
92	-54.8261	EX_succ_e	10.8056	-10	0.0694611	4	31.7019	-5.75177	27.0716	-3.75903	8.38941	b2415, b3736, b0343, b1380	2DGLCptspp, ACGAptspp, ACMANAptspp, ACMUMptspp, ARBTptspp, ASCBptspp, ATPS4rpp, CELBpts, CHTBSptspp, DHAPT, FRUpts2pp, FRUptspp, GALTptspp, GAMptspp, GLCptspp, LCTStpp, LDH_D, MALTptspp, MANGLYCptspp, MANptspp, MNLptspp, SBTptspp, SUCptspp, TREptspp
93	-54.8261	EX_succ_e	10.8056	-10	0.0694611	4	31.7019	-5.75177	27.0716	-3.75903	8.38941	b2415, b3732, b0343, b1380	2DGLCptspp, ACGAptspp, ACMANAptspp, ACMUMptspp, ARBTptspp, ASCBptspp, ATPS4rpp, CELBpts, CHTBSptspp, DHAPT, FRUpts2pp, FRUptspp, GALTptspp, GAMptspp, GLCptspp, LCTStpp, LDH_D, MALTptspp, MANGLYCptspp, MANptspp, MNLptspp, SBTptspp, SUCptspp, TREptspp
94	-54.8261	EX_succ_e	10.8056	-10	0.0694611	4	31.7019	-5.75177	27.0716	-3.75903	8.38941	b2415, b2964, b3732, b1380	2DGLCptspp, ACGAptspp, ACMANAptspp, ACMUMptspp, ARBTptspp, ASCBptspp, ATPS4rpp, CELBpts, CHTBSptspp, DGSNt2pp, DHAPT, DINSt2pp, FRUpts2pp, FRUptspp, GALTptspp, GAMptspp, GLCptspp, GSNt2pp, LDH_D, MALTptspp, MANGLYCptspp, MANptspp, MNLptspp, SBTptspp, SUCptspp, TREptspp
95	-54.8261	EX_succ_e	10.8056	-10	0.0694611	4	31.7019	-5.75177	27.0716	-3.75903	8.38941	b2415, b2964, b3736, b1380	2DGLCptspp, ACGAptspp, ACMANAptspp, ACMUMptspp, ARBTptspp, ASCBptspp, ATPS4rpp, CELBpts, CHTBSptspp, DGSNt2pp, DHAPT, DINSt2pp, FRUpts2pp, FRUptspp, GALTptspp, GAMptspp, GLCptspp, GSNt2pp, LDH_D, MALTptspp, MANGLYCptspp, MANptspp, MNLptspp, SBTptspp, SUCptspp, TREptspp
96	-54.8261	EX_succ_e	10.8056	-10	0.0694611	4	31.7019	-5.75177	27.0716	-3.75903	8.38941	b2415, b3736, b1380, b0514	2DGLCptspp, ACGAptspp, ACMANAptspp, ACMUMptspp, ARBTptspp, ASCBptspp, ATPS4rpp, CELBpts, CHTBSptspp, DHAPT, FRUpts2pp, FRUptspp, GALTptspp, GAMptspp, GLCptspp, GLYCK, LDH_D, MALTptspp, MANGLYCptspp, MANptspp, MNLptspp, SBTptspp, SUCptspp, TREptspp
97	-54.8261	EX_succ_e	10.8056	-10	0.0694611	4	31.7019	-5.75177	27.0716	-3.75903	8.38941	b2415, b3732, b1380, b0514	2DGLCptspp, ACGAptspp, ACMANAptspp, ACMUMptspp, ARBTptspp, ASCBptspp, ATPS4rpp, CELBpts, CHTBSptspp, DHAPT, FRUpts2pp, FRUptspp, GALTptspp, GAMptspp, GLCptspp, GLYCK, LDH_D, MALTptspp, MANGLYCptspp, MANptspp, MNLptspp, SBTptspp, SUCptspp, TREptspp
98	-54.8261	EX_succ_e	10.8056	-10	0.0694611	4	31.7019	-5.75177	27.0716	-3.75903	8.38941	b2415, b4123, b3736, b1380	2DGLCptspp, ACGAptspp, ACMANAptspp, ACMUMptspp, ARBTptspp, ASCBptspp, ATPS4rpp, CELBpts, CHTBSptspp, DHAPT, FRUpts2pp, FRUptspp, GALTptspp, GAMptspp, GLCptspp, LDH_D, MALTptspp, MANGLYCptspp, MANptspp, MNLptspp, SBTptspp, SUCTARTtpp, SUCptspp, TARTt2_3pp, TREptspp
99	-54.8261	EX_succ_e	10.8056	-10	0.0694611	4	31.7019	-5.75177	27.0716	-3.75903	8.38941	b2415, b4123, b3732, b1380	2DGLCptspp, ACGAptspp, ACMANAptspp, ACMUMptspp, ARBTptspp, ASCBptspp, ATPS4rpp, CELBpts, CHTBSptspp, DHAPT, FRUpts2pp, FRUptspp, GALTptspp, GAMptspp, GLCptspp, LDH_D, MALTptspp, MANGLYCptspp, MANptspp, MNLptspp, SBTptspp, SUCTARTtpp, SUCptspp, TARTt2_3pp, TREptspp
100	-54.8261	EX_succ_e	10.8056	-10	0.0694611	4	31.7019	-5.75177	27.0716	-3.75903	8.38941	b2415, b3732, b1380, b0037	2DGLCptspp, ACGAptspp, ACMANAptspp, ACMUMptspp, ARBTptspp, ASCBptspp, ATPS4rpp, CELBpts, CHTBSptspp, CRNCAL2, CRNDCAL2, CTBTCAL2, DHAPT, FRUpts2pp, FRUptspp, GALTptspp, GAMptspp, GLCptspp, LDH_D, MALTptspp, MANGLYCptspp, MANptspp, MNLptspp, SBTptspp, SUCptspp, TREptspp
101	-54.8261	EX_succ_e	10.8056	-10	0.0694611	4	31.7019	-5.75177	27.0716	-3.75903	8.38941	b2415, b3736, b1380, b0037	2DGLCptspp, ACGAptspp, ACMANAptspp, ACMUMptspp, ARBTptspp, ASCBptspp, ATPS4rpp, CELBpts, CHTBSptspp, CRNCAL2, CRNDCAL2, CTBTCAL2, DHAPT, FRUpts2pp, FRUptspp, GALTptspp, GAMptspp, GLCptspp, LDH_D, MALTptspp, MANGLYCptspp, MANptspp, MNLptspp, SBTptspp, SUCptspp, TREptspp
102	-54.8261	EX_succ_e	10.8056	-10	0.0694611	4	31.7019	-5.75177	27.0716	-3.75903	8.38941	b2415, b3732, b1380, b4266	2DGLCptspp, 5DGLCNR, ACGAptspp, ACMANAptspp, ACMUMptspp, ARBTptspp, ASCBptspp, ATPS4rpp, CELBpts, CHTBSptspp, DHAPT, FRUpts2pp, FRUptspp, GALTptspp, GAMptspp, GLCptspp, LDH_D, MALTptspp, MANGLYCptspp, MANptspp, MNLptspp, SBTptspp, SUCptspp, TREptspp
103	-54.8261	EX_succ_e	10.8056	-10	0.0694611	4	31.7019	-5.75177	27.0716	-3.75903	8.38941	b2415, b3736, b1380, b4266	2DGLCptspp, 5DGLCNR, ACGAptspp, ACMANAptspp, ACMUMptspp, ARBTptspp, ASCBptspp, ATPS4rpp, CELBpts, CHTBSptspp, DHAPT, FRUpts2pp, FRUptspp, GALTptspp, GAMptspp, GLCptspp, LDH_D, MALTptspp, MANGLYCptspp, MANptspp, MNLptspp, SBTptspp, SUCptspp, TREptspp
104	-54.8261	EX_succ_e	10.8056	-10	0.0694611	4	31.7019	-5.75177	27.0716	-3.75903	8.38941	b0517, b2415, b3732, b1380	2DGLCptspp, ACGAptspp, ACMANAptspp, ACMUMptspp, ARBTptspp, ASCBptspp, ATPS4rpp, CELBpts, CHTBSptspp, DHAPT, FRUpts2pp, FRUptspp, GALTptspp, GAMptspp, GLCptspp, LDH_D, MALTptspp, MANGLYCptspp, MANptspp, MNLptspp, SBTptspp, SUCptspp, TREptspp, URDGLYCD
105	-54.8261	EX_succ_e	10.8056	-10	0.0694611	4	31.7019	-5.75177	27.0716	-3.75903	8.38941	b2415, b3732, b1380, b3116	2DGLCptspp, ACGAptspp, ACMANAptspp, ACMUMptspp, ARBTptspp, ASCBptspp, ATPS4rpp, CELBpts, CHTBSptspp, DHAPT, FRUpts2pp, FRUptspp, GALTptspp, GAMptspp, GLCptspp, LDH_D, MALTptspp, MANGLYCptspp, MANptspp, MNLptspp, SBTptspp, SUCptspp, THRt2rpp, TREptspp
106	-54.8261	EX_succ_e	10.8056	-10	0.0694611	4	31.7019	-5.75177	27.0716	-3.75903	8.38941	b2415, b3736, b1380, b3116	2DGLCptspp, ACGAptspp, ACMANAptspp, ACMUMptspp, ARBTptspp, ASCBptspp, ATPS4rpp, CELBpts, CHTBSptspp, DHAPT, FRUpts2pp, FRUptspp, GALTptspp, GAMptspp, GLCptspp, LDH_D, MALTptspp, MANGLYCptspp, MANptspp, MNLptspp, SBTptspp, SUCptspp, THRt2rpp, TREptspp
107	-54.8261	EX_succ_e	10.8056	-10	0.0694611	4	31.7019	-5.75177	27.0716	-3.75903	8.38941	b0586, b2415, b3736, b1380	2DGLCptspp, ACGAptspp, ACMANAptspp, ACMUMptspp, ARBTptspp, ASCBptspp, ATPS4rpp, CELBpts, CHTBSptspp, DHAPT, FRUpts2pp, FRUptspp, GALTptspp, GAMptspp, GLCptspp, LDH_D, MALTptspp, MANGLYCptspp, MANptspp, MNLptspp, SBTptspp, SERASr, SUCptspp, TREptspp
108	-54.8261	EX_succ_e	10.8056	-10	0.0694611	4	31.7019	-5.75177	27.0716	-3.75903	8.38941	b0583, b2415, b3732, b1380	2DGLCptspp, ACGAptspp, ACMANAptspp, ACMUMptspp, ARBTptspp, ASCBptspp, ATPS4rpp, CELBpts, CHTBSptspp, DHAPT, ENTCS, FRUpts2pp, FRUptspp, GALTptspp, GAMptspp, GLCptspp, LDH_D, MALTptspp, MANGLYCptspp, MANptspp, MNLptspp, SBTptspp, SUCptspp, TREptspp
109	-54.8261	EX_succ_e	10.8056	-10	0.0694611	4	31.7019	-5.75177	27.0716	-3.75903	8.38941	b2415, b3732, b1380, b0594	2DGLCptspp, ACGAptspp, ACMANAptspp, ACMUMptspp, ARBTptspp, ASCBptspp, ATPS4rpp, CELBpts, CHTBSptspp, DHAPT, DHBS, FRUpts2pp, FRUptspp, GALTptspp, GAMptspp, GLCptspp, LDH_D, MALTptspp, MANGLYCptspp, MANptspp, MNLptspp, SBTptspp, SUCptspp, TREptspp
110	-54.8261	EX_succ_e	10.8056	-10	0.0694611	4	31.7019	-5.75177	27.0716	-3.75903	8.38941	b0583, b2415, b3736, b1380	2DGLCptspp, ACGAptspp, ACMANAptspp, ACMUMptspp, ARBTptspp, ASCBptspp, ATPS4rpp, CELBpts, CHTBSptspp, DHAPT, ENTCS, FRUpts2pp, FRUptspp, GALTptspp, GAMptspp, GLCptspp, LDH_D, MALTptspp, MANGLYCptspp, MANptspp, MNLptspp, SBTptspp, SUCptspp, TREptspp
111	-54.8261	EX_succ_e	10.8056	-10	0.0694611	4	31.7019	-5.75177	27.0716	-3.75903	8.38941	b2415, b3736, b1380, b0594	2DGLCptspp, ACGAptspp, ACMANAptspp, ACMUMptspp, ARBTptspp, ASCBptspp, ATPS4rpp, CELBpts, CHTBSptspp, DHAPT, DHBS, FRUpts2pp, FRUptspp, GALTptspp, GAMptspp, GLCptspp, LDH_D, MALTptspp, MANGLYCptspp, MANptspp, MNLptspp, SBTptspp, SUCptspp, TREptspp
112	-54.8261	EX_succ_e	10.8056	-10	0.0694611	4	31.7019	-5.75177	27.0716	-3.75903	8.38941	b0586, b2415, b3732, b1380	2DGLCptspp, ACGAptspp, ACMANAptspp, ACMUMptspp, ARBTptspp, ASCBptspp, ATPS4rpp, CELBpts, CHTBSptspp, DHAPT, FRUpts2pp, FRUptspp, GALTptspp, GAMptspp, GLCptspp, LDH_D, MALTptspp, MANGLYCptspp, MANptspp, MNLptspp, SBTptspp, SERASr, SUCptspp, TREptspp
113	-54.8261	EX_succ_e	10.8056	-10	0.0694611	4	31.7019	-5.75177	27.0716	-3.75903	8.38941	b2415, b3732, b3029, b1380	2DGLCptspp, ACGAptspp, ACMANAptspp, ACMUMptspp, ARBTptspp, ASCBptspp, ATPS4rpp, CELBpts, CHTBSptspp, DHAPT, FRUpts2pp, FRUptspp, GALTptspp, GAMptspp, GLCptspp, LDH_D, MALTptspp, MANGLYCptspp, MANptspp, MNLptspp, QMO2, QMO3, SBTptspp, SUCptspp, TREptspp
114	-54.8261	EX_succ_e	10.8056	-10	0.0694611	4	31.7019	-5.75177	27.0716	-3.75903	8.38941	b2415, b3736, b3029, b1380	2DGLCptspp, ACGAptspp, ACMANAptspp, ACMUMptspp, ARBTptspp, ASCBptspp, ATPS4rpp, CELBpts, CHTBSptspp, DHAPT, FRUpts2pp, FRUptspp, GALTptspp, GAMptspp, GLCptspp, LDH_D, MALTptspp, MANGLYCptspp, MANptspp, MNLptspp, QMO2, QMO3, SBTptspp, SUCptspp, TREptspp
115	-54.8261	EX_succ_e	10.8056	-10	0.0694611	4	31.7019	-5.75177	27.0716	-3.75903	8.38941	b2418, b2415, b3732, b1380	2DGLCptspp, ACGAptspp, ACMANAptspp, ACMUMptspp, ARBTptspp, ASCBptspp, ATPS4rpp, CELBpts, CHTBSptspp, DHAPT, FRUpts2pp, FRUptspp, GALTptspp, GAMptspp, GLCptspp, LDH_D, MALTptspp, MANGLYCptspp, MANptspp, MNLptspp, PYDAMK, PYDXNK, SBTptspp, SUCptspp, TREptspp
116	-54.8261	EX_succ_e	10.8056	-10	0.0694611	4	31.7019	-5.75177	27.0716	-3.75903	8.38941	b2418, b2415, b3736, b1380	2DGLCptspp, ACGAptspp, ACMANAptspp, ACMUMptspp, ARBTptspp, ASCBptspp, ATPS4rpp, CELBpts, CHTBSptspp, DHAPT, FRUpts2pp, FRUptspp, GALTptspp, GAMptspp, GLCptspp, LDH_D, MALTptspp, MANGLYCptspp, MANptspp, MNLptspp, PYDAMK, PYDXNK, SBTptspp, SUCptspp, TREptspp
117	-54.8261	EX_succ_e	10.8056	-10	0.0694611	4	31.7019	-5.75177	27.0716	-3.75903	8.38941	b0030, b2415, b3736, b1380	2DGLCptspp, ACGAptspp, ACMANAptspp, ACMUMptspp, ADNUC, ARBTptspp, ASCBptspp, ATPS4rpp, CELBpts, CHTBSptspp, DHAPT, FRUpts2pp, FRUptspp, GALTptspp, GAMptspp, GLCptspp, INSH, LDH_D, MALTptspp, MANGLYCptspp, MANptspp, MNLptspp, SBTptspp, SUCptspp, TREptspp, XTSNH
118	-54.8261	EX_succ_e	10.8056	-10	0.0694611	4	31.7019	-5.75177	27.0716	-3.75903	8.38941	b0030, b2415, b3732, b1380	2DGLCptspp, ACGAptspp, ACMANAptspp, ACMUMptspp, ADNUC, ARBTptspp, ASCBptspp, ATPS4rpp, CELBpts, CHTBSptspp, DHAPT, FRUpts2pp, FRUptspp, GALTptspp, GAMptspp, GLCptspp, INSH, LDH_D, MALTptspp, MANGLYCptspp, MANptspp, MNLptspp, SBTptspp, SUCptspp, TREptspp, XTSNH
119	-54.8261	EX_succ_e	10.8056	-10	0.0694611	4	31.7019	-5.75177	27.0716	-3.75903	8.38941	b0049, b2415, b3732, b1380	2DGLCptspp, ACGAptspp, ACMANAptspp, ACMUMptspp, AP4AH, AP5AH, ARBTptspp, ASCBptspp, ATPS4rpp, CELBpts, CHTBSptspp, DHAPT, FRUpts2pp, FRUptspp, GALTptspp, GAMptspp, GLCptspp, GP4GH, LDH_D, MALTptspp, MANGLYCptspp, MANptspp, MNLptspp, SBTptspp, SUCptspp, TREptspp
120	-54.8261	EX_succ_e	10.8056	-10	0.0694611	4	31.7019	-5.75177	27.0716	-3.75903	8.38941	b0049, b2415, b3736, b1380	2DGLCptspp, ACGAptspp, ACMANAptspp, ACMUMptspp, AP4AH, AP5AH, ARBTptspp, ASCBptspp, ATPS4rpp, CELBpts, CHTBSptspp, DHAPT, FRUpts2pp, FRUptspp, GALTptspp, GAMptspp, GLCptspp, GP4GH, LDH_D, MALTptspp, MANGLYCptspp, MANptspp, MNLptspp, SBTptspp, SUCptspp, TREptspp
121	-54.8261	EX_succ_e	10.8056	-10	0.0694611	4	31.7019	-5.75177	27.0716	-3.75903	8.38941	b2415, b3732, b1380, b4129	2DGLCptspp, ACGAptspp, ACMANAptspp, ACMUMptspp, AP4AS, ARBTptspp, ASCBptspp, ATPS4rpp, CELBpts, CHTBSptspp, DHAPT, FRUpts2pp, FRUptspp, GALTptspp, GAMptspp, GLCptspp, LDH_D, MALTptspp, MANGLYCptspp, MANptspp, MNLptspp, SBTptspp, SUCptspp, TREptspp
122	-54.8261	EX_succ_e	10.8056	-10	0.0694611	4	31.7019	-5.75177	27.0716	-3.75903	8.38941	b2415, b3736, b1380, b4129	2DGLCptspp, ACGAptspp, ACMANAptspp, ACMUMptspp, AP4AS, ARBTptspp, ASCBptspp, ATPS4rpp, CELBpts, CHTBSptspp, DHAPT, FRUpts2pp, FRUptspp, GALTptspp, GAMptspp, GLCptspp, LDH_D, MALTptspp, MANGLYCptspp, MANptspp, MNLptspp, SBTptspp, SUCptspp, TREptspp
123	-54.8261	EX_succ_e	10.8056	-10	0.0694611	4	31.7019	-5.75177	27.0716	-3.75903	8.38941	b2415, b2498, b3732, b1380	2DGLCptspp, ACGAptspp, ACMANAptspp, ACMUMptspp, ARBTptspp, ASCBptspp, ATPS4rpp, CELBpts, CHTBSptspp, DHAPT, FRUpts2pp, FRUptspp, GALTptspp, GAMptspp, GLCptspp, LDH_D, MALTptspp, MANGLYCptspp, MANptspp, MNLptspp, SBTptspp, SUCptspp, TREptspp, UPPRT
124	-54.8261	EX_succ_e	10.8056	-10	0.0694611	4	31.7019	-5.75177	27.0716	-3.75903	8.38941	b2415, b1603, b3732, b1380	2DGLCptspp, ACGAptspp, ACMANAptspp, ACMUMptspp, ARBTptspp, ASCBptspp, ATPS4rpp, CELBpts, CHTBSptspp, DHAPT, FRUpts2pp, FRUptspp, GALTptspp, GAMptspp, GLCptspp, LDH_D, MALTptspp, MANGLYCptspp, MANptspp, MNLptspp, SBTptspp, SUCptspp, THD2pp, TREptspp
125	-54.8261	EX_succ_e	10.8056	-10	0.0694611	4	31.7019	-5.75177	27.0716	-3.75903	8.38941	b2415, b1603, b3736, b1380	2DGLCptspp, ACGAptspp, ACMANAptspp, ACMUMptspp, ARBTptspp, ASCBptspp, ATPS4rpp, CELBpts, CHTBSptspp, DHAPT, FRUpts2pp, FRUptspp, GALTptspp, GAMptspp, GLCptspp, LDH_D, MALTptspp, MANGLYCptspp, MANptspp, MNLptspp, SBTptspp, SUCptspp, THD2pp, TREptspp
126	-54.8261	EX_succ_e	10.8056	-10	0.0694611	4	31.7019	-5.75177	27.0716	-3.75903	8.38941	b2415, b1602, b3732, b1380	2DGLCptspp, ACGAptspp, ACMANAptspp, ACMUMptspp, ARBTptspp, ASCBptspp, ATPS4rpp, CELBpts, CHTBSptspp, DHAPT, FRUpts2pp, FRUptspp, GALTptspp, GAMptspp, GLCptspp, LDH_D, MALTptspp, MANGLYCptspp, MANptspp, MNLptspp, SBTptspp, SUCptspp, THD2pp, TREptspp
127	-54.8261	EX_succ_e	10.8056	-10	0.0694611	4	31.7019	-5.75177	27.0716	-3.75903	8.38941	b2415, b1602, b3736, b1380	2DGLCptspp, ACGAptspp, ACMANAptspp, ACMUMptspp, ARBTptspp, ASCBptspp, ATPS4rpp, CELBpts, CHTBSptspp, DHAPT, FRUpts2pp, FRUptspp, GALTptspp, GAMptspp, GLCptspp, LDH_D, MALTptspp, MANGLYCptspp, MANptspp, MNLptspp, SBTptspp, SUCptspp, THD2pp, TREptspp
128	-54.8261	EX_succ_e	10.8056	-10	0.0694611	4	31.7019	-5.75177	27.0716	-3.75903	8.38941	b2415, b3736, b0612, b1380	2DGLCptspp, ACGAptspp, ACMANAptspp, ACMUMptspp, ARBTptspp, ASCBptspp, ATPS4rpp, CELBpts, CHTBSptspp, CITt7pp, DHAPT, FRUpts2pp, FRUptspp, GALTptspp, GAMptspp, GLCptspp, LDH_D, MALTptspp, MANGLYCptspp, MANptspp, MNLptspp, SBTptspp, SUCptspp, TREptspp
129	-54.8261	EX_succ_e	10.8056	-10	0.0694611	4	31.7019	-5.75177	27.0716	-3.75903	8.38941	b2415, b3732, b0612, b1380	2DGLCptspp, ACGAptspp, ACMANAptspp, ACMUMptspp, ARBTptspp, ASCBptspp, ATPS4rpp, CELBpts, CHTBSptspp, CITt7pp, DHAPT, FRUpts2pp, FRUptspp, GALTptspp, GAMptspp, GLCptspp, LDH_D, MALTptspp, MANGLYCptspp, MANptspp, MNLptspp, SBTptspp, SUCptspp, TREptspp
130	-54.8261	EX_succ_e	10.8056	-10	0.0694611	4	31.7019	-5.75177	27.0716	-3.75903	8.38941	b2415, b3732, b1380, b0494	2DGLCptspp, ACGAptspp, ACMANAptspp, ACMUMptspp, ARBTptspp, ASCBptspp, ATPS4rpp, CELBpts, CHTBSptspp, DHAPT, FRUpts2pp, FRUptspp, GALTptspp, GAMptspp, GLCptspp, LDH_D, LPLIPAL1A120pp, LPLIPAL1A140pp, LPLIPAL1A141pp, LPLIPAL1A160pp, LPLIPAL1A161pp, LPLIPAL1A180pp, LPLIPAL1A181pp, LPLIPAL1E120pp, LPLIPAL1E140pp, LPLIPAL1E141pp, LPLIPAL1E160pp, LPLIPAL1E161pp, LPLIPAL1E180pp, LPLIPAL1E181pp, LPLIPAL1…
131	-54.8261	EX_succ_e	10.8056	-10	0.0694611	4	31.7019	-5.75177	27.0716	-3.75903	8.38941	b2415, b3736, b1380, b0494	2DGLCptspp, ACGAptspp, ACMANAptspp, ACMUMptspp, ARBTptspp, ASCBptspp, ATPS4rpp, CELBpts, CHTBSptspp, DHAPT, FRUpts2pp, FRUptspp, GALTptspp, GAMptspp, GLCptspp, LDH_D, LPLIPAL1A120pp, LPLIPAL1A140pp, LPLIPAL1A141pp, LPLIPAL1A160pp, LPLIPAL1A161pp, LPLIPAL1A180pp, LPLIPAL1A181pp, LPLIPAL1E120pp, LPLIPAL1E140pp, LPLIPAL1E141pp, LPLIPAL1E160pp, LPLIPAL1E161pp, LPLIPAL1E180pp, LPLIPAL1E181pp, LPLIPAL1…
132	-54.8261	EX_succ_e	10.8056	-10	0.0694611	4	31.7019	-5.75177	27.0716	-3.75903	8.38941	b2415, b3736, b1216, b1380	2DGLCptspp, ACGAptspp, ACMANAptspp, ACMUMptspp, ARBTptspp, ASCBptspp, ATPS4rpp, CA2t3pp, CELBpts, CHTBSptspp, DHAPT, FRUpts2pp, FRUptspp, GALTptspp, GAMptspp, GLCptspp, LDH_D, MALTptspp, MANGLYCptspp, MANptspp, MNLptspp, SBTptspp, SUCptspp, TREptspp
133	-54.8261	EX_succ_e	10.8056	-10	0.0694611	4	31.7019	-5.75177	27.0716	-3.75903	8.38941	b2415, b3732, b1216, b1380	2DGLCptspp, ACGAptspp, ACMANAptspp, ACMUMptspp, ARBTptspp, ASCBptspp, ATPS4rpp, CA2t3pp, CELBpts, CHTBSptspp, DHAPT, FRUpts2pp, FRUptspp, GALTptspp, GAMptspp, GLCptspp, LDH_D, MALTptspp, MANGLYCptspp, MANptspp, MNLptspp, SBTptspp, SUCptspp, TREptspp
134	-54.8261	EX_succ_e	10.8056	-10	0.0694611	4	31.7019	-5.75177	27.0716	-3.75903	8.38941	b3752, b2415, b3732, b1380	2DGLCptspp, ACGAptspp, ACMANAptspp, ACMUMptspp, ARBTptspp, ASCBptspp, ATPS4rpp, CELBpts, CHTBSptspp, DHAPT, FRUpts2pp, FRUptspp, GALTptspp, GAMptspp, GLCptspp, LDH_D, MALTptspp, MANGLYCptspp, MANptspp, MNLptspp, RBK, SBTptspp, SUCptspp, TREptspp
135	-54.8261	EX_succ_e	10.8056	-10	0.0694611	4	31.7019	-5.75177	27.0716	-3.75903	8.38941	b3752, b2415, b3736, b1380	2DGLCptspp, ACGAptspp, ACMANAptspp, ACMUMptspp, ARBTptspp, ASCBptspp, ATPS4rpp, CELBpts, CHTBSptspp, DHAPT, FRUpts2pp, FRUptspp, GALTptspp, GAMptspp, GLCptspp, LDH_D, MALTptspp, MANGLYCptspp, MANptspp, MNLptspp, RBK, SBTptspp, SUCptspp, TREptspp
136	-54.8261	EX_succ_e	10.8056	-10	0.0694611	4	31.7019	-5.75177	27.0716	-3.75903	8.38941	b2415, b3732, b1186, b1380	2DGLCptspp, ACGAptspp, ACMANAptspp, ACMUMptspp, ARBTptspp, ASCBptspp, ATPS4rpp, CELBpts, CHTBSptspp, DHAPT, FRUpts2pp, FRUptspp, GALTptspp, GAMptspp, GLCptspp, LDH_D, MALTptspp, MANGLYCptspp, MANptspp, MNLptspp, NAt3_1p5pp, SBTptspp, SUCptspp, TREptspp
137	-54.8261	EX_succ_e	10.8056	-10	0.0694611	4	31.7019	-5.75177	27.0716	-3.75903	8.38941	b3962, b2415, b3736, b1380	2DGLCptspp, ACGAptspp, ACMANAptspp, ACMUMptspp, ARBTptspp, ASCBptspp, ATPS4rpp, CELBpts, CHTBSptspp, DHAPT, FRUpts2pp, FRUptspp, GALTptspp, GAMptspp, GLCptspp, LDH_D, MALTptspp, MANGLYCptspp, MANptspp, MNLptspp, NADTRHD, SBTptspp, SUCptspp, TREptspp
138	-54.8261	EX_succ_e	10.8056	-10	0.0694611	4	31.7019	-5.75177	27.0716	-3.75903	8.38941	b2415, b3732, b1380, b2328	2DGLCptspp, ACGAptspp, ACMANAptspp, ACMUMptspp, ARBTptspp, ASCBptspp, ATPS4rpp, CELBpts, CHTBSptspp, DHAPT, FRUpts2pp, FRUptspp, GALTptspp, GAMptspp, GLCptspp, LDH_D, MALTptspp, MANGLYCptspp, MANptspp, MLDEP1pp, MLDEP2pp, MNLptspp, SBTptspp, SUCptspp, TREptspp
139	-54.8261	EX_succ_e	10.8056	-10	0.0694611	4	31.7019	-5.75177	27.0716	-3.75903	8.38941	b2415, b3736, b1380, b2328	2DGLCptspp, ACGAptspp, ACMANAptspp, ACMUMptspp, ARBTptspp, ASCBptspp, ATPS4rpp, CELBpts, CHTBSptspp, DHAPT, FRUpts2pp, FRUptspp, GALTptspp, GAMptspp, GLCptspp, LDH_D, MALTptspp, MANGLYCptspp, MANptspp, MLDEP1pp, MLDEP2pp, MNLptspp, SBTptspp, SUCptspp, TREptspp
140	-54.8261	EX_succ_e	10.8056	-10	0.0694611	4	31.7019	-5.75177	27.0716	-3.75903	8.38941	b2415, b3460, b3732, b1380	2DGLCptspp, ACGAptspp, ACMANAptspp, ACMUMptspp, ALAabcpp, ARBTptspp, ASCBptspp, ATPS4rpp, CELBpts, CHTBSptspp, DHAPT, FRUpts2pp, FRUptspp, GALTptspp, GAMptspp, GLCptspp, ILEabcpp, LDH_D, MALTptspp, MANGLYCptspp, MANptspp, MNLptspp, SBTptspp, SUCptspp, THRabcpp, TREptspp, VALabcpp
141	-54.8261	EX_succ_e	10.8056	-10	0.0694611	4	31.7019	-5.75177	27.0716	-3.75903	8.38941	b2415, b3460, b3736, b1380	2DGLCptspp, ACGAptspp, ACMANAptspp, ACMUMptspp, ALAabcpp, ARBTptspp, ASCBptspp, ATPS4rpp, CELBpts, CHTBSptspp, DHAPT, FRUpts2pp, FRUptspp, GALTptspp, GAMptspp, GLCptspp, ILEabcpp, LDH_D, MALTptspp, MANGLYCptspp, MANptspp, MNLptspp, SBTptspp, SUCptspp, THRabcpp, TREptspp, VALabcpp
142	-54.8261	EX_succ_e	10.8056	-10	0.0694611	4	31.7019	-5.75177	27.0716	-3.75903	8.38941	b2415, b3732, b2131, b1380	2DGLCptspp, ACGAptspp, ACMANAptspp, ACMUMptspp, ARBTptspp, ASCBptspp, ATPS4rpp, CELBpts, CHLabcpp, CHTBSptspp, DHAPT, FRUpts2pp, FRUptspp, GALTptspp, GAMptspp, GLCptspp, LDH_D, MALTptspp, MANGLYCptspp, MANptspp, MNLptspp, SBTptspp, SUCptspp, TREptspp
143	-54.8261	EX_succ_e	10.8056	-10	0.0694611	4	31.7019	-5.75177	27.0716	-3.75903	8.38941	b2415, b3732, b2130, b1380	2DGLCptspp, ACGAptspp, ACMANAptspp, ACMUMptspp, ARBTptspp, ASCBptspp, ATPS4rpp, CELBpts, CHLabcpp, CHTBSptspp, DHAPT, FRUpts2pp, FRUptspp, GALTptspp, GAMptspp, GLCptspp, LDH_D, MALTptspp, MANGLYCptspp, MANptspp, MNLptspp, SBTptspp, SUCptspp, TREptspp
144	-54.8261	EX_succ_e	10.8056	-10	0.0694611	4	31.7019	-5.75177	27.0716	-3.75903	8.38941	b2415, b3736, b2131, b1380	2DGLCptspp, ACGAptspp, ACMANAptspp, ACMUMptspp, ARBTptspp, ASCBptspp, ATPS4rpp, CELBpts, CHLabcpp, CHTBSptspp, DHAPT, FRUpts2pp, FRUptspp, GALTptspp, GAMptspp, GLCptspp, LDH_D, MALTptspp, MANGLYCptspp, MANptspp, MNLptspp, SBTptspp, SUCptspp, TREptspp
145	-54.8261	EX_succ_e	10.8056	-10	0.0694611	4	31.7019	-5.75177	27.0716	-3.75903	8.38941	b2415, b3736, b2130, b1380	2DGLCptspp, ACGAptspp, ACMANAptspp, ACMUMptspp, ARBTptspp, ASCBptspp, ATPS4rpp, CELBpts, CHLabcpp, CHTBSptspp, DHAPT, FRUpts2pp, FRUptspp, GALTptspp, GAMptspp, GLCptspp, LDH_D, MALTptspp, MANGLYCptspp, MANptspp, MNLptspp, SBTptspp, SUCptspp, TREptspp
146	-54.8261	EX_succ_e	10.8056	-10	0.0694611	4	31.7019	-5.75177	27.0716	-3.75903	8.38941	b2415, b3736, b2129, b1380	2DGLCptspp, ACGAptspp, ACMANAptspp, ACMUMptspp, ARBTptspp, ASCBptspp, ATPS4rpp, CELBpts, CHLabcpp, CHTBSptspp, DHAPT, FRUpts2pp, FRUptspp, GALTptspp, GAMptspp, GLCptspp, LDH_D, MALTptspp, MANGLYCptspp, MANptspp, MNLptspp, SBTptspp, SUCptspp, TREptspp
147	-54.8261	EX_succ_e	10.8056	-10	0.0694611	4	31.7019	-5.75177	27.0716	-3.75903	8.38941	b2415, b3732, b2128, b1380	2DGLCptspp, ACGAptspp, ACMANAptspp, ACMUMptspp, ARBTptspp, ASCBptspp, ATPS4rpp, CELBpts, CHLabcpp, CHTBSptspp, DHAPT, FRUpts2pp, FRUptspp, GALTptspp, GAMptspp, GLCptspp, LDH_D, MALTptspp, MANGLYCptspp, MANptspp, MNLptspp, SBTptspp, SUCptspp, TREptspp
148	-54.8261	EX_succ_e	10.8056	-10	0.0694611	4	31.7019	-5.75177	27.0716	-3.75903	8.38941	b2415, b3732, b2129, b1380	2DGLCptspp, ACGAptspp, ACMANAptspp, ACMUMptspp, ARBTptspp, ASCBptspp, ATPS4rpp, CELBpts, CHLabcpp, CHTBSptspp, DHAPT, FRUpts2pp, FRUptspp, GALTptspp, GAMptspp, GLCptspp, LDH_D, MALTptspp, MANGLYCptspp, MANptspp, MNLptspp, SBTptspp, SUCptspp, TREptspp
149	-54.8261	EX_succ_e	10.8056	-10	0.0694611	4	31.7019	-5.75177	27.0716	-3.75903	8.38941	b2415, b3736, b2128, b1380	2DGLCptspp, ACGAptspp, ACMANAptspp, ACMUMptspp, ARBTptspp, ASCBptspp, ATPS4rpp, CELBpts, CHLabcpp, CHTBSptspp, DHAPT, FRUpts2pp, FRUptspp, GALTptspp, GAMptspp, GLCptspp, LDH_D, MALTptspp, MANGLYCptspp, MANptspp, MNLptspp, SBTptspp, SUCptspp, TREptspp
150	-54.8261	EX_succ_e	10.8056	-10	0.0694611	4	31.7019	-5.75177	27.0716	-3.75903	8.38941	b2744, b2415, b3732, b1380	2DGLCptspp, ACGAptspp, ACMANAptspp, ACMUMptspp, ARBTptspp, ASCBptspp, ATPS4rpp, CELBpts, CHTBSptspp, DHAPT, FRUpts2pp, FRUptspp, GALTptspp, GAMptspp, GLCptspp, LDH_D, MALTptspp, MANGLYCptspp, MANptspp, MNLptspp, NTD10, SBTptspp, SUCptspp, TREptspp
151	-54.8261	EX_succ_e	10.8056	-10	0.0694611	4	31.7019	-5.75177	27.0716	-3.75903	8.38941	b2744, b2415, b3736, b1380	2DGLCptspp, ACGAptspp, ACMANAptspp, ACMUMptspp, ARBTptspp, ASCBptspp, ATPS4rpp, CELBpts, CHTBSptspp, DHAPT, FRUpts2pp, FRUptspp, GALTptspp, GAMptspp, GLCptspp, LDH_D, MALTptspp, MANGLYCptspp, MANptspp, MNLptspp, NTD10, SBTptspp, SUCptspp, TREptspp
152	-54.8261	EX_succ_e	10.8056	-10	0.0694611	4	31.7019	-5.75177	27.0716	-3.75903	8.38941	b1134, b2415, b3732, b1380	2DGLCptspp, ACGAptspp, ACMANAptspp, ACMUMptspp, ARBTptspp, ASCBptspp, ATPS4rpp, CELBpts, CHTBSptspp, DHAPT, FRUpts2pp, FRUptspp, GALTptspp, GAMptspp, GLCptspp, LDH_D, MALTptspp, MANGLYCptspp, MANptspp, MNLptspp, SBTptspp, SUCptspp, TDP, TREptspp
153	-54.8261	EX_succ_e	10.8056	-10	0.0694611	4	31.7019	-5.75177	27.0716	-3.75903	8.38941	b1134, b2415, b3736, b1380	2DGLCptspp, ACGAptspp, ACMANAptspp, ACMUMptspp, ARBTptspp, ASCBptspp, ATPS4rpp, CELBpts, CHTBSptspp, DHAPT, FRUpts2pp, FRUptspp, GALTptspp, GAMptspp, GLCptspp, LDH_D, MALTptspp, MANGLYCptspp, MANptspp, MNLptspp, SBTptspp, SUCptspp, TDP, TREptspp
154	-54.8261	EX_succ_e	10.8056	-10	0.0694611	4	31.7019	-5.75177	27.0716	-3.75903	8.38941	b2415, b3732, b0040, b1380	2DGLCptspp, ACGAptspp, ACMANAptspp, ACMUMptspp, ARBTptspp, ASCBptspp, ATPS4rpp, CELBpts, CHTBSptspp, CRNt7pp, CRNt8pp, DHAPT, FRUpts2pp, FRUptspp, GALTptspp, GAMptspp, GLCptspp, LDH_D, MALTptspp, MANGLYCptspp, MANptspp, MNLptspp, SBTptspp, SUCptspp, TREptspp
155	-54.8261	EX_succ_e	10.8056	-10	0.0694611	4	31.7019	-5.75177	27.0716	-3.75903	8.38941	b2415, b3736, b0040, b1380	2DGLCptspp, ACGAptspp, ACMANAptspp, ACMUMptspp, ARBTptspp, ASCBptspp, ATPS4rpp, CELBpts, CHTBSptspp, CRNt7pp, CRNt8pp, DHAPT, FRUpts2pp, FRUptspp, GALTptspp, GAMptspp, GLCptspp, LDH_D, MALTptspp, MANGLYCptspp, MANptspp, MNLptspp, SBTptspp, SUCptspp, TREptspp
156	-54.8261	EX_succ_e	10.8056	-10	0.0694611	4	31.7019	-5.75177	27.0716	-3.75903	8.38941	b2415, b3732, b1380, b0325	2DGLCptspp, ACGAptspp, ACMANAptspp, ACMUMptspp, ARBTptspp, ASCBptspp, ATPS4rpp, CELBpts, CHTBSptspp, DHAPT, FRUpts2pp, FRUptspp, GALTptspp, GAMptspp, GLCptspp, LCARSyi, LDH_D, MALTptspp, MANGLYCptspp, MANptspp, MNLptspp, PPDOy, SBTptspp, SUCptspp, TREptspp
157	-54.8261	EX_succ_e	10.8056	-10	0.0694611	4	31.7019	-5.75177	27.0716	-3.75903	8.38941	b2415, b3736, b1380, b0325	2DGLCptspp, ACGAptspp, ACMANAptspp, ACMUMptspp, ARBTptspp, ASCBptspp, ATPS4rpp, CELBpts, CHTBSptspp, DHAPT, FRUpts2pp, FRUptspp, GALTptspp, GAMptspp, GLCptspp, LCARSyi, LDH_D, MALTptspp, MANGLYCptspp, MANptspp, MNLptspp, PPDOy, SBTptspp, SUCptspp, TREptspp
158	-54.8261	EX_succ_e	10.8056	-10	0.0694611	4	31.7019	-5.75177	27.0716	-3.75903	8.38941	b2415, b3732, b1015, b1380	2DGLCptspp, ACGAptspp, ACMANAptspp, ACMUMptspp, ARBTptspp, ASCBptspp, ATPS4rpp, CELBpts, CHTBSptspp, DHAPT, FRUpts2pp, FRUptspp, GALTptspp, GAMptspp, GLCptspp, LDH_D, MALTptspp, MANGLYCptspp, MANptspp, MNLptspp, PPAt4pp, PROt4pp, SBTptspp, SUCptspp, TREptspp
159	-54.8261	EX_succ_e	10.8056	-10	0.0694611	4	31.7019	-5.75177	27.0716	-3.75903	8.38941	b0403, b2415, b3736, b1380	2DGLCptspp, ACGAptspp, ACMANAptspp, ACMUMptspp, ARBTptspp, ASCBptspp, ATPS4rpp, CELBpts, CHTBSptspp, DHAPT, FRUpts2pp, FRUptspp, GALTptspp, GAMptspp, GLCptspp, LDH_D, MALTptspp, MANGLYCptspp, MANptspp, MLTG1, MLTG2, MLTG3, MLTG4, MLTG5, MNLptspp, SBTptspp, SUCptspp, TREptspp
160	-54.8261	EX_succ_e	10.8056	-10	0.0694611	4	31.7019	-5.75177	27.0716	-3.75903	8.38941	b0403, b2415, b3732, b1380	2DGLCptspp, ACGAptspp, ACMANAptspp, ACMUMptspp, ARBTptspp, ASCBptspp, ATPS4rpp, CELBpts, CHTBSptspp, DHAPT, FRUpts2pp, FRUptspp, GALTptspp, GAMptspp, GLCptspp, LDH_D, MALTptspp, MANGLYCptspp, MANptspp, MLTG1, MLTG2, MLTG3, MLTG4, MLTG5, MNLptspp, SBTptspp, SUCptspp, TREptspp
161	-54.8261	EX_succ_e	10.8056	-10	0.0694611	4	31.7019	-5.75177	27.0716	-3.75903	8.38941	b2415, b3732, b3821, b1380	2DGLCptspp, ACGAptspp, ACMANAptspp, ACMUMptspp, ARBTptspp, ASCBptspp, ATPS4rpp, CELBpts, CHTBSptspp, DHAPT, FRUpts2pp, FRUptspp, GALTptspp, GAMptspp, GLCptspp, LDH_D, MALTptspp, MANGLYCptspp, MANptspp, MNLptspp, PLIPA1A120pp, PLIPA1A140pp, PLIPA1A141pp, PLIPA1A160pp, PLIPA1A161pp, PLIPA1A180pp, PLIPA1A181pp, PLIPA1E120pp, PLIPA1E140pp, PLIPA1E141pp, PLIPA1E160pp, PLIPA1E161pp, PLIPA1E180pp, PLIPA…
162	-54.8261	EX_succ_e	10.8056	-10	0.0694611	4	31.7019	-5.75177	27.0716	-3.75903	8.38941	b2415, b3736, b3821, b1380	2DGLCptspp, ACGAptspp, ACMANAptspp, ACMUMptspp, ARBTptspp, ASCBptspp, ATPS4rpp, CELBpts, CHTBSptspp, DHAPT, FRUpts2pp, FRUptspp, GALTptspp, GAMptspp, GLCptspp, LDH_D, MALTptspp, MANGLYCptspp, MANptspp, MNLptspp, PLIPA1A120pp, PLIPA1A140pp, PLIPA1A141pp, PLIPA1A160pp, PLIPA1A161pp, PLIPA1A180pp, PLIPA1A181pp, PLIPA1E120pp, PLIPA1E140pp, PLIPA1E141pp, PLIPA1E160pp, PLIPA1E161pp, PLIPA1E180pp, PLIPA…
163	-54.8261	EX_succ_e	10.8056	-10	0.0694611	4	31.7019	-5.75177	27.0716	-3.75903	8.38941	b2415, b3732, b1492, b1380	2DGLCptspp, ACGAptspp, ACMANAptspp, ACMUMptspp, ARBTptspp, ASCBptspp, ATPS4rpp, CELBpts, CHTBSptspp, DHAPT, FRUpts2pp, FRUptspp, GALTptspp, GAMptspp, GLCptspp, GLUABUTt7pp, LDH_D, MALTptspp, MANGLYCptspp, MANptspp, MNLptspp, SBTptspp, SUCptspp, TREptspp
164	-54.8261	EX_succ_e	10.8056	-10	0.0694611	4	31.7019	-5.75177	27.0716	-3.75903	8.38941	b2415, b3736, b1492, b1380	2DGLCptspp, ACGAptspp, ACMANAptspp, ACMUMptspp, ARBTptspp, ASCBptspp, ATPS4rpp, CELBpts, CHTBSptspp, DHAPT, FRUpts2pp, FRUptspp, GALTptspp, GAMptspp, GLCptspp, GLUABUTt7pp, LDH_D, MALTptspp, MANGLYCptspp, MANptspp, MNLptspp, SBTptspp, SUCptspp, TREptspp
165	-54.8261	EX_succ_e	10.8056	-10	0.0694611	4	31.7019	-5.75177	27.0716	-3.75903	8.38941	b0469, b2415, b3736, b1380	2DGLCptspp, ACGAptspp, ACMANAptspp, ACMUMptspp, ADPT, ARBTptspp, ASCBptspp, ATPS4rpp, CELBpts, CHTBSptspp, DHAPT, FRUpts2pp, FRUptspp, GALTptspp, GAMptspp, GLCptspp, LDH_D, MALTptspp, MANGLYCptspp, MANptspp, MNLptspp, SBTptspp, SUCptspp, TREptspp
166	-54.8261	EX_succ_e	10.8056	-10	0.0694611	4	31.7019	-5.75177	27.0716	-3.75903	8.38941	b0469, b2415, b3732, b1380	2DGLCptspp, ACGAptspp, ACMANAptspp, ACMUMptspp, ADPT, ARBTptspp, ASCBptspp, ATPS4rpp, CELBpts, CHTBSptspp, DHAPT, FRUpts2pp, FRUptspp, GALTptspp, GAMptspp, GLCptspp, LDH_D, MALTptspp, MANGLYCptspp, MANptspp, MNLptspp, SBTptspp, SUCptspp, TREptspp
167	-54.8261	EX_succ_e	10.8056	-10	0.0694611	4	31.7019	-5.75177	27.0716	-3.75903	8.38941	b2415, b0596, b3732, b1380	2DGLCptspp, ACGAptspp, ACMANAptspp, ACMUMptspp, ARBTptspp, ASCBptspp, ATPS4rpp, CELBpts, CHTBSptspp, DHAPT, DHBD, FRUpts2pp, FRUptspp, GALTptspp, GAMptspp, GLCptspp, LDH_D, MALTptspp, MANGLYCptspp, MANptspp, MNLptspp, SBTptspp, SUCptspp, TREptspp
168	-54.8261	EX_succ_e	10.8056	-10	0.0694611	4	31.7019	-5.75177	27.0716	-3.75903	8.38941	b2415, b0596, b3736, b1380	2DGLCptspp, ACGAptspp, ACMANAptspp, ACMUMptspp, ARBTptspp, ASCBptspp, ATPS4rpp, CELBpts, CHTBSptspp, DHAPT, DHBD, FRUpts2pp, FRUptspp, GALTptspp, GAMptspp, GLCptspp, LDH_D, MALTptspp, MANGLYCptspp, MANptspp, MNLptspp, SBTptspp, SUCptspp, TREptspp
169	-54.8261	EX_succ_e	10.8056	-10	0.0694611	4	31.7019	-5.75177	27.0716	-3.75903	8.38941	b2415, b0595, b3732, b1380	2DGLCptspp, ACGAptspp, ACMANAptspp, ACMUMptspp, ARBTptspp, ASCBptspp, ATPS4rpp, CELBpts, CHTBSptspp, DHAPT, FRUpts2pp, FRUptspp, GALTptspp, GAMptspp, GLCptspp, ICHORT, LDH_D, MALTptspp, MANGLYCptspp, MANptspp, MNLptspp, SBTptspp, SUCptspp, TREptspp
170	-54.8261	EX_succ_e	10.8056	-10	0.0694611	4	31.7019	-5.75177	27.0716	-3.75903	8.38941	b2415, b0595, b3736, b1380	2DGLCptspp, ACGAptspp, ACMANAptspp, ACMUMptspp, ARBTptspp, ASCBptspp, ATPS4rpp, CELBpts, CHTBSptspp, DHAPT, FRUpts2pp, FRUptspp, GALTptspp, GAMptspp, GLCptspp, ICHORT, LDH_D, MALTptspp, MANGLYCptspp, MANptspp, MNLptspp, SBTptspp, SUCptspp, TREptspp
171	-54.8261	EX_succ_e	10.8056	-10	0.0694611	4	31.7019	-5.75177	27.0716	-3.75903	8.38941	b1851, b2415, b3732, b1380	2DGLCptspp, ACGAptspp, ACMANAptspp, ACMUMptspp, ARBTptspp, ASCBptspp, ATPS4rpp, CELBpts, CHTBSptspp, DHAPT, EDD, FRUpts2pp, FRUptspp, GALTptspp, GAMptspp, GLCptspp, LDH_D, MALTptspp, MANGLYCptspp, MANptspp, MNLptspp, SBTptspp, SUCptspp, TREptspp
172	-54.8261	EX_succ_e	10.8056	-10	0.0694611	4	31.7019	-5.75177	27.0716	-3.75903	8.38941	b2415, b3736, b1380, b0401	2DGLCptspp, ACGAptspp, ACMANAptspp, ACMUMptspp, ARBTptspp, ASCBptspp, ATPS4rpp, CELBpts, CHTBSptspp, DHAPT, FRUpts2pp, FRUptspp, GALTptspp, GAMptspp, GLCptspp, ILEt2rpp, LDH_D, LEUt2rpp, MALTptspp, MANGLYCptspp, MANptspp, MNLptspp, SBTptspp, SUCptspp, TREptspp, VALt2rpp
173	-54.8261	EX_succ_e	10.8056	-10	0.0694611	4	31.7019	-5.75177	27.0716	-3.75903	8.38941	b2415, b3732, b2835, b1380	2AGPA120tipp, 2AGPA140tipp, 2AGPA141tipp, 2AGPA160tipp, 2AGPA161tipp, 2AGPA180tipp, 2AGPA181tipp, 2AGPE120tipp, 2AGPE140tipp, 2AGPE141tipp, 2AGPE160tipp, 2AGPE161tipp, 2AGPE180tipp, 2AGPE181tipp, 2AGPG120tipp, 2AGPG140tipp, 2AGPG141tipp, 2AGPG160tipp, 2AGPG161tipp, 2AGPG180tipp, 2AGPG181tipp, 2DGLCptspp, ACGAptspp, ACMANAptspp, ACMUMptspp, ARBTptspp, ASCBptspp, ATPS4rpp, CELBpts, CHTBSptspp, DHAP…
174	-54.8261	EX_succ_e	10.8056	-10	0.0694611	4	31.7019	-5.75177	27.0716	-3.75903	8.38941	b2415, b3736, b2835, b1380	2AGPA120tipp, 2AGPA140tipp, 2AGPA141tipp, 2AGPA160tipp, 2AGPA161tipp, 2AGPA180tipp, 2AGPA181tipp, 2AGPE120tipp, 2AGPE140tipp, 2AGPE141tipp, 2AGPE160tipp, 2AGPE161tipp, 2AGPE180tipp, 2AGPE181tipp, 2AGPG120tipp, 2AGPG140tipp, 2AGPG141tipp, 2AGPG160tipp, 2AGPG161tipp, 2AGPG180tipp, 2AGPG181tipp, 2DGLCptspp, ACGAptspp, ACMANAptspp, ACMUMptspp, ARBTptspp, ASCBptspp, ATPS4rpp, CELBpts, CHTBSptspp, DHAP…
175	-54.8261	EX_succ_e	10.8056	-10	0.0694611	4	31.7019	-5.75177	27.0716	-3.75903	8.38941	b2415, b3732, b1380, b0401	2DGLCptspp, ACGAptspp, ACMANAptspp, ACMUMptspp, ARBTptspp, ASCBptspp, ATPS4rpp, CELBpts, CHTBSptspp, DHAPT, FRUpts2pp, FRUptspp, GALTptspp, GAMptspp, GLCptspp, ILEt2rpp, LDH_D, LEUt2rpp, MALTptspp, MANGLYCptspp, MANptspp, MNLptspp, SBTptspp, SUCptspp, TREptspp, VALt2rpp
176	-54.8261	EX_succ_e	10.8056	-10	0.0694611	4	31.7019	-5.75177	27.0716	-3.75903	8.38941	b2415, b3732, b3035, b1380	2DGLCptspp, ACGAptspp, ACMANAptspp, ACMUMptspp, ARBTptspp, ASCBptspp, ATPS4rpp, CELBpts, CHTBSptspp, CMtpp, DHAPT, DOXRBCNtpp, FEENTERtex, FRUpts2pp, FRUptspp, FUSAtpp, GALTptspp, GAMptspp, GLCptspp, INDOLEt2pp, LDH_D, MALTptspp, MANGLYCptspp, MANptspp, MINCYCtpp, MNLptspp, NOVBCNtpp, RFAMPtpp, SBTptspp, SUCptspp, TREptspp, TTRCYCtpp
177	-54.8261	EX_succ_e	10.8056	-10	0.0694611	4	31.7019	-5.75177	27.0716	-3.75903	8.38941	b2415, b3736, b3035, b1380	2DGLCptspp, ACGAptspp, ACMANAptspp, ACMUMptspp, ARBTptspp, ASCBptspp, ATPS4rpp, CELBpts, CHTBSptspp, CMtpp, DHAPT, DOXRBCNtpp, FEENTERtex, FRUpts2pp, FRUptspp, FUSAtpp, GALTptspp, GAMptspp, GLCptspp, INDOLEt2pp, LDH_D, MALTptspp, MANGLYCptspp, MANptspp, MINCYCtpp, MNLptspp, NOVBCNtpp, RFAMPtpp, SBTptspp, SUCptspp, TREptspp, TTRCYCtpp
178	-54.8261	EX_succ_e	10.8056	-10	0.0694611	4	31.7019	-5.75177	27.0716	-3.75903	8.38941	b2415, b1415, b3732, b1380	2DGLCptspp, ACGAptspp, ACMANAptspp, ACMUMptspp, ARBTptspp, ASCBptspp, ATPS4rpp, CELBpts, CHTBSptspp, DHAPT, FRUpts2pp, FRUptspp, GALTptspp, GAMptspp, GCALDD, GLCptspp, LCADi, LDH_D, MALTptspp, MANGLYCptspp, MANptspp, MNLptspp, SBTptspp, SUCptspp, TREptspp
179	-54.8261	EX_succ_e	10.8056	-10	0.0694611	4	31.7019	-5.75177	27.0716	-3.75903	8.38941	b2415, b1415, b3736, b1380	2DGLCptspp, ACGAptspp, ACMANAptspp, ACMUMptspp, ARBTptspp, ASCBptspp, ATPS4rpp, CELBpts, CHTBSptspp, DHAPT, FRUpts2pp, FRUptspp, GALTptspp, GAMptspp, GCALDD, GLCptspp, LCADi, LDH_D, MALTptspp, MANGLYCptspp, MANptspp, MNLptspp, SBTptspp, SUCptspp, TREptspp
180	-54.8261	EX_succ_e	10.8056	-10	0.0694611	4	31.7019	-5.75177	27.0716	-3.75903	8.38941	b2463, b2415, b3736, b1380	2DGLCptspp, ACGAptspp, ACMANAptspp, ACMUMptspp, ARBTptspp, ASCBptspp, ATPS4rpp, CELBpts, CHTBSptspp, DHAPT, FRUpts2pp, FRUptspp, GALTptspp, GAMptspp, GLCptspp, LDH_D, MALTptspp, MANGLYCptspp, MANptspp, ME2, MNLptspp, SBTptspp, SUCptspp, TREptspp
181	-54.8261	EX_succ_e	10.8056	-10	0.0694611	4	31.7019	-5.75177	27.0716	-3.75903	8.38941	b2415, b3732, b1380, b0543	2DGLCptspp, ACGAptspp, ACMANAptspp, ACMUMptspp, ARBTptspp, ASCBptspp, ATPS4rpp, CELBpts, CHLt3pp, CHTBSptspp, DHAPT, FRUpts2pp, FRUptspp, GALTptspp, GAMptspp, GLCptspp, GLYBt3pp, LDH_D, MALTptspp, MANGLYCptspp, MANptspp, MNLptspp, SBTptspp, SUCptspp, TREptspp
182	-54.8261	EX_succ_e	10.8056	-10	0.0694611	4	31.7019	-5.75177	27.0716	-3.75903	8.38941	b2415, b3736, b1380, b0543	2DGLCptspp, ACGAptspp, ACMANAptspp, ACMUMptspp, ARBTptspp, ASCBptspp, ATPS4rpp, CELBpts, CHLt3pp, CHTBSptspp, DHAPT, FRUpts2pp, FRUptspp, GALTptspp, GAMptspp, GLCptspp, GLYBt3pp, LDH_D, MALTptspp, MANGLYCptspp, MANptspp, MNLptspp, SBTptspp, SUCptspp, TREptspp
183	-54.8261	EX_succ_e	10.8056	-10	0.0694611	4	31.7019	-5.75177	27.0716	-3.75903	8.38941	b2415, b3732, b4132, b1380	2DGLCptspp, ACGAptspp, ACMANAptspp, ACMUMptspp, ARBTptspp, ASCBptspp, ATPS4rpp, CADVtpp, CELBpts, CHTBSptspp, DHAPT, FRUpts2pp, FRUptspp, GALTptspp, GAMptspp, GLCptspp, LDH_D, MALTptspp, MANGLYCptspp, MANptspp, MNLptspp, SBTptspp, SUCptspp, TREptspp
184	-54.8261	EX_succ_e	10.8056	-10	0.0694611	4	31.7019	-5.75177	27.0716	-3.75903	8.38941	b2415, b3736, b1380, b0723	2DGLCptspp, ACGAptspp, ACMANAptspp, ACMUMptspp, ARBTptspp, ASCBptspp, ATPS4rpp, CELBpts, CHTBSptspp, DHAPT, FRUpts2pp, FRUptspp, GALTptspp, GAMptspp, GLCptspp, LDH_D, MALTptspp, MANGLYCptspp, MANptspp, MNLptspp, SBTptspp, SUCDi, SUCptspp, TREptspp
185	-54.8261	EX_succ_e	10.8056	-10	0.0694611	4	31.7019	-5.75177	27.0716	-3.75903	8.38941	b2415, b3732, b1380, b0724	2DGLCptspp, ACGAptspp, ACMANAptspp, ACMUMptspp, ARBTptspp, ASCBptspp, ATPS4rpp, CELBpts, CHTBSptspp, DHAPT, FRUpts2pp, FRUptspp, GALTptspp, GAMptspp, GLCptspp, LDH_D, MALTptspp, MANGLYCptspp, MANptspp, MNLptspp, SBTptspp, SUCDi, SUCptspp, TREptspp
186	-54.8261	EX_succ_e	10.8056	-10	0.0694611	4	31.7019	-5.75177	27.0716	-3.75903	8.38941	b2415, b3736, b1380, b0724	2DGLCptspp, ACGAptspp, ACMANAptspp, ACMUMptspp, ARBTptspp, ASCBptspp, ATPS4rpp, CELBpts, CHTBSptspp, DHAPT, FRUpts2pp, FRUptspp, GALTptspp, GAMptspp, GLCptspp, LDH_D, MALTptspp, MANGLYCptspp, MANptspp, MNLptspp, SBTptspp, SUCDi, SUCptspp, TREptspp
187	-54.8261	EX_succ_e	10.8056	-10	0.0694611	4	31.7019	-5.75177	27.0716	-3.75903	8.38941	b2415, b3732, b1380, b0721	2DGLCptspp, ACGAptspp, ACMANAptspp, ACMUMptspp, ARBTptspp, ASCBptspp, ATPS4rpp, CELBpts, CHTBSptspp, DHAPT, FRUpts2pp, FRUptspp, GALTptspp, GAMptspp, GLCptspp, LDH_D, MALTptspp, MANGLYCptspp, MANptspp, MNLptspp, SBTptspp, SUCDi, SUCptspp, TREptspp
188	-54.8261	EX_succ_e	10.8056	-10	0.0694611	4	31.7019	-5.75177	27.0716	-3.75903	8.38941	b2415, b3736, b1380, b0721	2DGLCptspp, ACGAptspp, ACMANAptspp, ACMUMptspp, ARBTptspp, ASCBptspp, ATPS4rpp, CELBpts, CHTBSptspp, DHAPT, FRUpts2pp, FRUptspp, GALTptspp, GAMptspp, GLCptspp, LDH_D, MALTptspp, MANGLYCptspp, MANptspp, MNLptspp, SBTptspp, SUCDi, SUCptspp, TREptspp
189	-54.8261	EX_succ_e	10.8056	-10	0.0694611	4	31.7019	-5.75177	27.0716	-3.75903	8.38941	b2415, b3732, b1380, b0722	2DGLCptspp, ACGAptspp, ACMANAptspp, ACMUMptspp, ARBTptspp, ASCBptspp, ATPS4rpp, CELBpts, CHTBSptspp, DHAPT, FRUpts2pp, FRUptspp, GALTptspp, GAMptspp, GLCptspp, LDH_D, MALTptspp, MANGLYCptspp, MANptspp, MNLptspp, SBTptspp, SUCDi, SUCptspp, TREptspp
190	-54.8261	EX_succ_e	10.8056	-10	0.0694611	4	31.7019	-5.75177	27.0716	-3.75903	8.38941	b2415, b3736, b1380, b0722	2DGLCptspp, ACGAptspp, ACMANAptspp, ACMUMptspp, ARBTptspp, ASCBptspp, ATPS4rpp, CELBpts, CHTBSptspp, DHAPT, FRUpts2pp, FRUptspp, GALTptspp, GAMptspp, GLCptspp, LDH_D, MALTptspp, MANGLYCptspp, MANptspp, MNLptspp, SBTptspp, SUCDi, SUCptspp, TREptspp
191	-54.8261	EX_succ_e	10.8056	-10	0.0694611	4	31.7019	-5.75177	27.0716	-3.75903	8.38941	b2415, b3732, b1380, b0723	2DGLCptspp, ACGAptspp, ACMANAptspp, ACMUMptspp, ARBTptspp, ASCBptspp, ATPS4rpp, CELBpts, CHTBSptspp, DHAPT, FRUpts2pp, FRUptspp, GALTptspp, GAMptspp, GLCptspp, LDH_D, MALTptspp, MANGLYCptspp, MANptspp, MNLptspp, SBTptspp, SUCDi, SUCptspp, TREptspp
192	-54.8261	EX_succ_e	10.8056	-10	0.0694611	4	31.7019	-5.75177	27.0716	-3.75903	8.38941	b2415, b3736, b1380, b2670	2DGLCptspp, ACGAptspp, ACMANAptspp, ACMUMptspp, ALAtpp, ARBTptspp, ASCBptspp, ATPS4rpp, CELBpts, CHTBSptspp, DHAPT, FRUpts2pp, FRUptspp, GALTptspp, GAMptspp, GLCptspp, LDH_D, MALTptspp, MANGLYCptspp, MANptspp, MNLptspp, SBTptspp, SUCptspp, TREptspp
193	-54.8261	EX_succ_e	10.8056	-10	0.0694611	4	31.7019	-5.75177	27.0716	-3.75903	8.38941	b2415, b3732, b1380, b2670	2DGLCptspp, ACGAptspp, ACMANAptspp, ACMUMptspp, ALAtpp, ARBTptspp, ASCBptspp, ATPS4rpp, CELBpts, CHTBSptspp, DHAPT, FRUpts2pp, FRUptspp, GALTptspp, GAMptspp, GLCptspp, LDH_D, MALTptspp, MANGLYCptspp, MANptspp, MNLptspp, SBTptspp, SUCptspp, TREptspp
194	-54.8261	EX_succ_e	10.8056	-10	0.0694611	4	31.7019	-5.75177	27.0716	-3.75903	8.38941	b2415, b4381, b3732, b1380	2DGLCptspp, ACGAptspp, ACMANAptspp, ACMUMptspp, ARBTptspp, ASCBptspp, ATPS4rpp, CELBpts, CHTBSptspp, DHAPT, DRPA, FRUpts2pp, FRUptspp, GALTptspp, GAMptspp, GLCptspp, LDH_D, MALTptspp, MANGLYCptspp, MANptspp, MNLptspp, SBTptspp, SUCptspp, TREptspp
195	-54.8261	EX_succ_e	10.8056	-10	0.0694611	4	31.7019	-5.75177	27.0716	-3.75903	8.38941	b2415, b4381, b3736, b1380	2DGLCptspp, ACGAptspp, ACMANAptspp, ACMUMptspp, ARBTptspp, ASCBptspp, ATPS4rpp, CELBpts, CHTBSptspp, DHAPT, DRPA, FRUpts2pp, FRUptspp, GALTptspp, GAMptspp, GLCptspp, LDH_D, MALTptspp, MANGLYCptspp, MANptspp, MNLptspp, SBTptspp, SUCptspp, TREptspp
196	-54.8261	EX_succ_e	10.8056	-10	0.0694611	4	31.7019	-5.75177	27.0716	-3.75903	8.38941	b1398, b2415, b3732, b1380	2DGLCptspp, ACGAptspp, ACMANAptspp, ACMUMptspp, ARBTptspp, ASCBptspp, ATPS4rpp, CELBpts, CHTBSptspp, DHAPT, FRUpts2pp, FRUptspp, GALTptspp, GAMptspp, GLCptspp, LDH_D, MALTptspp, MANGLYCptspp, MANptspp, MNLptspp, PACCOAL, SBTptspp, SUCptspp, TREptspp
197	-54.8261	EX_succ_e	10.8056	-10	0.0694611	4	31.7019	-5.75177	27.0716	-3.75903	8.38941	b2066, b2415, b3736, b1380	2DGLCptspp, ACGAptspp, ACMANAptspp, ACMUMptspp, ARBTptspp, ASCBptspp, ATPS4rpp, CELBpts, CHTBSptspp, CYTDK1, CYTDK2, DHAPT, FRUpts2pp, FRUptspp, GALTptspp, GAMptspp, GLCptspp, LDH_D, MALTptspp, MANGLYCptspp, MANptspp, MNLptspp, SBTptspp, SUCptspp, TREptspp, URIK1, URIK2
198	-54.8261	EX_succ_e	10.8056	-10	0.0694611	4	31.7019	-5.75177	27.0716	-3.75903	8.38941	b2066, b2415, b3732, b1380	2DGLCptspp, ACGAptspp, ACMANAptspp, ACMUMptspp, ARBTptspp, ASCBptspp, ATPS4rpp, CELBpts, CHTBSptspp, CYTDK1, CYTDK2, DHAPT, FRUpts2pp, FRUptspp, GALTptspp, GAMptspp, GLCptspp, LDH_D, MALTptspp, MANGLYCptspp, MANptspp, MNLptspp, SBTptspp, SUCptspp, TREptspp, URIK1, URIK2
199	-54.8261	EX_succ_e	10.8056	-10	0.0694611	4	31.7019	-5.75177	27.0716	-3.75903	8.38941	b2415, b3732, b1380, b0007	2DGLCptspp, ACGAptspp, ACMANAptspp, ACMUMptspp, ALAt4pp, ARBTptspp, ASCBptspp, ATPS4rpp, CELBpts, CHTBSptspp, DHAPT, FRUpts2pp, FRUptspp, GALTptspp, GAMptspp, GLCptspp, GLYt4pp, LDH_D, MALTptspp, MANGLYCptspp, MANptspp, MNLptspp, SBTptspp, SUCptspp, TREptspp
200	-54.8261	EX_succ_e	10.8056	-10	0.0694611	4	31.7019	-5.75177	27.0716	-3.75903	8.38941	b2415, b3736, b1380, b0007	2DGLCptspp, ACGAptspp, ACMANAptspp, ACMUMptspp, ALAt4pp, ARBTptspp, ASCBptspp, ATPS4rpp, CELBpts, CHTBSptspp, DHAPT, FRUpts2pp, FRUptspp, GALTptspp, GAMptspp, GLCptspp, GLYt4pp, LDH_D, MALTptspp, MANGLYCptspp, MANptspp, MNLptspp, SBTptspp, SUCptspp, TREptspp
201	-54.8261	EX_succ_e	10.8056	-10	0.0694611	4	31.7019	-5.75177	27.0716	-3.75903	8.38941	b2415, b2308, b3732, b1380	2DGLCptspp, ACGAptspp, ACMANAptspp, ACMUMptspp, ARBTptspp, ASCBptspp, ATPS4rpp, CELBpts, CHTBSptspp, DHAPT, FRUpts2pp, FRUptspp, GALTptspp, GAMptspp, GLCptspp, HISabcpp, LDH_D, LYSabcpp, MALTptspp, MANGLYCptspp, MANptspp, MNLptspp, ORNabcpp, SBTptspp, SUCptspp, TREptspp
202	-54.8261	EX_succ_e	10.8056	-10	0.0694611	4	31.7019	-5.75177	27.0716	-3.75903	8.38941	b2415, b2307, b3732, b1380	2DGLCptspp, ACGAptspp, ACMANAptspp, ACMUMptspp, ARBTptspp, ASCBptspp, ATPS4rpp, CELBpts, CHTBSptspp, DHAPT, FRUpts2pp, FRUptspp, GALTptspp, GAMptspp, GLCptspp, HISabcpp, LDH_D, LYSabcpp, MALTptspp, MANGLYCptspp, MANptspp, MNLptspp, ORNabcpp, SBTptspp, SUCptspp, TREptspp
203	-54.8261	EX_succ_e	10.8056	-10	0.0694611	4	31.7019	-5.75177	27.0716	-3.75903	8.38941	b2415, b2307, b3736, b1380	2DGLCptspp, ACGAptspp, ACMANAptspp, ACMUMptspp, ARBTptspp, ASCBptspp, ATPS4rpp, CELBpts, CHTBSptspp, DHAPT, FRUpts2pp, FRUptspp, GALTptspp, GAMptspp, GLCptspp, HISabcpp, LDH_D, LYSabcpp, MALTptspp, MANGLYCptspp, MANptspp, MNLptspp, ORNabcpp, SBTptspp, SUCptspp, TREptspp
204	-54.8261	EX_succ_e	10.8056	-10	0.0694611	4	31.7019	-5.75177	27.0716	-3.75903	8.38941	b2415, b2306, b3732, b1380	2DGLCptspp, ACGAptspp, ACMANAptspp, ACMUMptspp, ARBTptspp, ASCBptspp, ATPS4rpp, CELBpts, CHTBSptspp, DHAPT, FRUpts2pp, FRUptspp, GALTptspp, GAMptspp, GLCptspp, HISabcpp, LDH_D, LYSabcpp, MALTptspp, MANGLYCptspp, MANptspp, MNLptspp, ORNabcpp, SBTptspp, SUCptspp, TREptspp
205	-54.8261	EX_succ_e	10.8056	-10	0.0694611	4	31.7019	-5.75177	27.0716	-3.75903	8.38941	b2415, b1236, b3732, b1380	2DGLCptspp, ACGAptspp, ACMANAptspp, ACMUMptspp, ARBTptspp, ASCBptspp, ATPS4rpp, CELBpts, CHTBSptspp, DHAPT, FRUpts2pp, FRUptspp, GALTptspp, GALUi, GAMptspp, GLCptspp, LDH_D, MALTptspp, MANGLYCptspp, MANptspp, MNLptspp, SBTptspp, SUCptspp, TREptspp
206	-54.8261	EX_succ_e	10.8056	-10	0.0694611	4	31.7019	-5.75177	27.0716	-3.75903	8.38941	b2415, b1236, b3736, b1380	2DGLCptspp, ACGAptspp, ACMANAptspp, ACMUMptspp, ARBTptspp, ASCBptspp, ATPS4rpp, CELBpts, CHTBSptspp, DHAPT, FRUpts2pp, FRUptspp, GALTptspp, GALUi, GAMptspp, GLCptspp, LDH_D, MALTptspp, MANGLYCptspp, MANptspp, MNLptspp, SBTptspp, SUCptspp, TREptspp
207	-54.8261	EX_succ_e	10.8056	-10	0.0694611	4	31.7019	-5.75177	27.0716	-3.75903	8.38941	b2415, b0261, b3732, b1380	2DGLCptspp, ACGAptspp, ACMANAptspp, ACMUMptspp, ARBTptspp, ASCBptspp, ATPS4rpp, CELBpts, CHTBSptspp, DHAPT, FRUpts2pp, FRUptspp, GALTptspp, GAMptspp, GLCptspp, HCYSMT, HCYSMT2, LDH_D, MALTptspp, MANGLYCptspp, MANptspp, MNLptspp, SBTptspp, SUCptspp, TREptspp
208	-54.8261	EX_succ_e	10.8056	-10	0.0694611	4	31.7019	-5.75177	27.0716	-3.75903	8.38941	b2415, b0261, b3736, b1380	2DGLCptspp, ACGAptspp, ACMANAptspp, ACMUMptspp, ARBTptspp, ASCBptspp, ATPS4rpp, CELBpts, CHTBSptspp, DHAPT, FRUpts2pp, FRUptspp, GALTptspp, GAMptspp, GLCptspp, HCYSMT, HCYSMT2, LDH_D, MALTptspp, MANGLYCptspp, MANptspp, MNLptspp, SBTptspp, SUCptspp, TREptspp
209	-54.8261	EX_succ_e	10.8056	-10	0.0694611	4	31.7019	-5.75177	27.0716	-3.75903	8.38941	b2415, b3732, b2954, b1380	2DGLCptspp, ACGAptspp, ACMANAptspp, ACMUMptspp, ARBTptspp, ASCBptspp, ATPS4rpp, CELBpts, CHTBSptspp, DHAPT, FRUpts2pp, FRUptspp, GALTptspp, GAMptspp, GLCptspp, LDH_D, MALTptspp, MANGLYCptspp, MANptspp, MNLptspp, NTPP10, NTPP11, NTPP9, SBTptspp, SUCptspp, TREptspp
210	-54.8261	EX_succ_e	10.8056	-10	0.0694611	4	31.7019	-5.75177	27.0716	-3.75903	8.38941	b2415, b3736, b2954, b1380	2DGLCptspp, ACGAptspp, ACMANAptspp, ACMUMptspp, ARBTptspp, ASCBptspp, ATPS4rpp, CELBpts, CHTBSptspp, DHAPT, FRUpts2pp, FRUptspp, GALTptspp, GAMptspp, GLCptspp, LDH_D, MALTptspp, MANGLYCptspp, MANptspp, MNLptspp, NTPP10, NTPP11, NTPP9, SBTptspp, SUCptspp, TREptspp
211	-54.8261	EX_succ_e	10.8056	-10	0.0694611	4	31.7019	-5.75177	27.0716	-3.75903	8.38941	b2415, b3736, b1297, b1380	2DGLCptspp, ACGAptspp, ACMANAptspp, ACMUMptspp, ARBTptspp, ASCBptspp, ATPS4rpp, CELBpts, CHTBSptspp, DHAPT, FRUpts2pp, FRUptspp, GALTptspp, GAMptspp, GGPTRCS, GLCptspp, LDH_D, MALTptspp, MANGLYCptspp, MANptspp, MNLptspp, SBTptspp, SUCptspp, TREptspp
212	-54.8261	EX_succ_e	10.8056	-10	0.0694611	4	31.7019	-5.75177	27.0716	-3.75903	8.38941	b2415, b3732, b1300, b1380	2DGLCptspp, 3HPADHi, ACGAptspp, ACMANAptspp, ACMUMptspp, ARBTptspp, ASCBptspp, ATPS4rpp, CELBpts, CHTBSptspp, DHAPT, FRUpts2pp, FRUptspp, GALTptspp, GAMptspp, GGGABADr, GLCptspp, LDH_D, MALTptspp, MANGLYCptspp, MANptspp, MNLptspp, SBTptspp, SUCptspp, TREptspp
213	-54.8261	EX_succ_e	10.8056	-10	0.0694611	4	31.7019	-5.75177	27.0716	-3.75903	8.38941	b2415, b3732, b1380, b1301	2DGLCptspp, ACGAptspp, ACMANAptspp, ACMUMptspp, ARBTptspp, ASCBptspp, ATPS4rpp, CELBpts, CHTBSptspp, DHAPT, FRUpts2pp, FRUptspp, GALTptspp, GAMptspp, GGPTRCO, GLCptspp, LDH_D, MALTptspp, MANGLYCptspp, MANptspp, MNLptspp, SBTptspp, SUCptspp, TREptspp
214	-54.8261	EX_succ_e	10.8056	-10	0.0694611	4	31.7019	-5.75177	27.0716	-3.75903	8.38941	b2415, b3736, b1300, b1380	2DGLCptspp, 3HPADHi, ACGAptspp, ACMANAptspp, ACMUMptspp, ARBTptspp, ASCBptspp, ATPS4rpp, CELBpts, CHTBSptspp, DHAPT, FRUpts2pp, FRUptspp, GALTptspp, GAMptspp, GGGABADr, GLCptspp, LDH_D, MALTptspp, MANGLYCptspp, MANptspp, MNLptspp, SBTptspp, SUCptspp, TREptspp
215	-54.8261	EX_succ_e	10.8056	-10	0.0694611	4	31.7019	-5.75177	27.0716	-3.75903	8.38941	b2415, b3736, b1380, b1301	2DGLCptspp, ACGAptspp, ACMANAptspp, ACMUMptspp, ARBTptspp, ASCBptspp, ATPS4rpp, CELBpts, CHTBSptspp, DHAPT, FRUpts2pp, FRUptspp, GALTptspp, GAMptspp, GGPTRCO, GLCptspp, LDH_D, MALTptspp, MANGLYCptspp, MANptspp, MNLptspp, SBTptspp, SUCptspp, TREptspp
216	-54.8261	EX_succ_e	10.8056	-10	0.0694611	4	31.7019	-5.75177	27.0716	-3.75903	8.38941	b2415, b3736, b1298, b1380	2DGLCptspp, ACGAptspp, ACMANAptspp, ACMUMptspp, ARBTptspp, ASCBptspp, ATPS4rpp, CELBpts, CHTBSptspp, DHAPT, FRUpts2pp, FRUptspp, GALTptspp, GAMptspp, GGGABAH, GLCptspp, LDH_D, MALTptspp, MANGLYCptspp, MANptspp, MNLptspp, SBTptspp, SUCptspp, TREptspp
217	-54.8261	EX_succ_e	10.8056	-10	0.0694611	4	31.7019	-5.75177	27.0716	-3.75903	8.38941	b2688, b2415, b3732, b1380	2DGLCptspp, ACGAptspp, ACMANAptspp, ACMUMptspp, ARBTptspp, ASCBptspp, ATPS4rpp, CELBpts, CHTBSptspp, DHAPT, FRUpts2pp, FRUptspp, GALTptspp, GAMptspp, GLCptspp, GLUCYS, LDH_D, MALTptspp, MANGLYCptspp, MANptspp, MNLptspp, SBTptspp, SUCptspp, TREptspp
218	-54.8261	EX_succ_e	10.8056	-10	0.0694611	4	31.7019	-5.75177	27.0716	-3.75903	8.38941	b2415, b3732, b2947, b1380	2DGLCptspp, ACGAptspp, ACMANAptspp, ACMUMptspp, ARBTptspp, ASCBptspp, ATPS4rpp, CELBpts, CHTBSptspp, DHAPT, FRUpts2pp, FRUptspp, GALTptspp, GAMptspp, GLCptspp, GTHS, LDH_D, MALTptspp, MANGLYCptspp, MANptspp, MNLptspp, SBTptspp, SUCptspp, TREptspp
219	-54.8261	EX_succ_e	10.8056	-10	0.0694611	4	31.7019	-5.75177	27.0716	-3.75903	8.38941	b2688, b2415, b3736, b1380	2DGLCptspp, ACGAptspp, ACMANAptspp, ACMUMptspp, ARBTptspp, ASCBptspp, ATPS4rpp, CELBpts, CHTBSptspp, DHAPT, FRUpts2pp, FRUptspp, GALTptspp, GAMptspp, GLCptspp, GLUCYS, LDH_D, MALTptspp, MANGLYCptspp, MANptspp, MNLptspp, SBTptspp, SUCptspp, TREptspp
220	-54.8261	EX_succ_e	10.8056	-10	0.0694611	4	31.7019	-5.75177	27.0716	-3.75903	8.38941	b2415, b3736, b2947, b1380	2DGLCptspp, ACGAptspp, ACMANAptspp, ACMUMptspp, ARBTptspp, ASCBptspp, ATPS4rpp, CELBpts, CHTBSptspp, DHAPT, FRUpts2pp, FRUptspp, GALTptspp, GAMptspp, GLCptspp, GTHS, LDH_D, MALTptspp, MANGLYCptspp, MANptspp, MNLptspp, SBTptspp, SUCptspp, TREptspp
221	-54.8261	EX_succ_e	10.8056	-10	0.0694611	4	31.7019	-5.75177	27.0716	-3.75903	8.38941	b2415, b2210, b3732, b1380	2DGLCptspp, ACGAptspp, ACMANAptspp, ACMUMptspp, ARBTptspp, ASCBptspp, ATPS4rpp, CELBpts, CHTBSptspp, DHAPT, FRUpts2pp, FRUptspp, GALTptspp, GAMptspp, GLCptspp, LDH_D, MALTptspp, MANGLYCptspp, MANptspp, MDH2, MDH3, MNLptspp, SBTptspp, SUCptspp, TREptspp
222	-54.8261	EX_succ_e	10.8056	-10	0.0694611	4	31.7019	-5.75177	27.0716	-3.75903	8.38941	b2415, b2210, b3736, b1380	2DGLCptspp, ACGAptspp, ACMANAptspp, ACMUMptspp, ARBTptspp, ASCBptspp, ATPS4rpp, CELBpts, CHTBSptspp, DHAPT, FRUpts2pp, FRUptspp, GALTptspp, GAMptspp, GLCptspp, LDH_D, MALTptspp, MANGLYCptspp, MANptspp, MDH2, MDH3, MNLptspp, SBTptspp, SUCptspp, TREptspp
223	-54.8261	EX_succ_e	10.8056	-10	0.0694611	4	31.7019	-5.75177	27.0716	-3.75903	8.38941	b2415, b3732, b2957, b1380	2DGLCptspp, ACGAptspp, ACMANAptspp, ACMUMptspp, ARBTptspp, ASCBptspp, ASNNpp, ATPS4rpp, CELBpts, CHTBSptspp, DHAPT, FRUpts2pp, FRUptspp, GALTptspp, GAMptspp, GLCptspp, GLUNpp, LDH_D, MALTptspp, MANGLYCptspp, MANptspp, MNLptspp, SBTptspp, SUCptspp, TREptspp
224	-54.8261	EX_succ_e	10.8056	-10	0.0694611	4	31.7019	-5.75177	27.0716	-3.75903	8.38941	b2415, b3736, b2957, b1380	2DGLCptspp, ACGAptspp, ACMANAptspp, ACMUMptspp, ARBTptspp, ASCBptspp, ASNNpp, ATPS4rpp, CELBpts, CHTBSptspp, DHAPT, FRUpts2pp, FRUptspp, GALTptspp, GAMptspp, GLCptspp, GLUNpp, LDH_D, MALTptspp, MANGLYCptspp, MANptspp, MNLptspp, SBTptspp, SUCptspp, TREptspp
225	-54.8261	EX_succ_e	10.8056	-10	0.0694611	4	31.7019	-5.75177	27.0716	-3.75903	8.38941	b2415, b3732, b1380, b2240	2DGLCptspp, ACGAptspp, ACMANAptspp, ACMUMptspp, ARBTptspp, ASCBptspp, ATPS4rpp, CELBpts, CHTBSptspp, DHAPT, FRUpts2pp, FRUptspp, GALTptspp, GAMptspp, GLCptspp, GLYC3Pt6pp, LDH_D, MALTptspp, MANGLYCptspp, MANptspp, MNLptspp, SBTptspp, SUCptspp, TREptspp
226	-54.8261	EX_succ_e	10.8056	-10	0.0694611	4	31.7019	-5.75177	27.0716	-3.75903	8.38941	b2415, b3736, b1380, b2240	2DGLCptspp, ACGAptspp, ACMANAptspp, ACMUMptspp, ARBTptspp, ASCBptspp, ATPS4rpp, CELBpts, CHTBSptspp, DHAPT, FRUpts2pp, FRUptspp, GALTptspp, GAMptspp, GLCptspp, GLYC3Pt6pp, LDH_D, MALTptspp, MANGLYCptspp, MANptspp, MNLptspp, SBTptspp, SUCptspp, TREptspp
227	-54.8261	EX_succ_e	10.8056	-10	0.0694611	4	31.7019	-5.75177	27.0716	-3.75903	8.38941	b2415, b3732, b1380, b3918	2DGLCptspp, ACGAptspp, ACMANAptspp, ACMUMptspp, ARBTptspp, ASCBptspp, ATPS4rpp, CDAPPA120, CDAPPA140, CDAPPA141, CDAPPA160, CDAPPA161, CDAPPA180, CDAPPA181, CELBpts, CHTBSptspp, DHAPT, FRUpts2pp, FRUptspp, GALTptspp, GAMptspp, GLCptspp, LDH_D, MALTptspp, MANGLYCptspp, MANptspp, MNLptspp, SBTptspp, SUCptspp, TREptspp
228	-54.8261	EX_succ_e	10.8056	-10	0.0694611	4	31.7019	-5.75177	27.0716	-3.75903	8.38941	b2415, b3736, b1380, b3918	2DGLCptspp, ACGAptspp, ACMANAptspp, ACMUMptspp, ARBTptspp, ASCBptspp, ATPS4rpp, CDAPPA120, CDAPPA140, CDAPPA141, CDAPPA160, CDAPPA161, CDAPPA180, CDAPPA181, CELBpts, CHTBSptspp, DHAPT, FRUpts2pp, FRUptspp, GALTptspp, GAMptspp, GLCptspp, LDH_D, MALTptspp, MANGLYCptspp, MANptspp, MNLptspp, SBTptspp, SUCptspp, TREptspp
229	-54.8261	EX_succ_e	10.8056	-10	0.0694611	4	31.7019	-5.75177	27.0716	-3.75903	8.38941	b2415, b1521, b3732, b1380	2DGLCptspp, ACGAptspp, ACMANAptspp, ACMUMptspp, ARBTptspp, ASCBptspp, ATPS4rpp, CELBpts, CHTBSptspp, DHAPT, FRUpts2pp, FRUptspp, GALTptspp, GAMptspp, GLCptspp, LDH_D, MALTptspp, MANGLYCptspp, MANptspp, MNLptspp, SBTptspp, SUCptspp, TAGURr, TREptspp
230	-54.8261	EX_succ_e	10.8056	-10	0.0694611	4	31.7019	-5.75177	27.0716	-3.75903	8.38941	b2415, b1521, b3736, b1380	2DGLCptspp, ACGAptspp, ACMANAptspp, ACMUMptspp, ARBTptspp, ASCBptspp, ATPS4rpp, CELBpts, CHTBSptspp, DHAPT, FRUpts2pp, FRUptspp, GALTptspp, GAMptspp, GLCptspp, LDH_D, MALTptspp, MANGLYCptspp, MANptspp, MNLptspp, SBTptspp, SUCptspp, TAGURr, TREptspp
231	-54.8261	EX_succ_e	10.8056	-10	0.0694611	4	31.7019	-5.75177	27.0716	-3.75903	8.38941	b2415, b3732, b1380, b3093	2DGLCptspp, ACGAptspp, ACMANAptspp, ACMUMptspp, ARBTptspp, ASCBptspp, ATPS4rpp, CELBpts, CHTBSptspp, DHAPT, FRUpts2pp, FRUptspp, GALTptspp, GALURt2rpp, GAMptspp, GLCptspp, LDH_D, MALTptspp, MANGLYCptspp, MANptspp, MNLptspp, SBTptspp, SUCptspp, TREptspp
232	-54.8261	EX_succ_e	10.8056	-10	0.0694611	4	31.7019	-5.75177	27.0716	-3.75903	8.38941	b3091, b2415, b3732, b1380	2DGLCptspp, ACGAptspp, ACMANAptspp, ACMUMptspp, ALTRH, ARBTptspp, ASCBptspp, ATPS4rpp, CELBpts, CHTBSptspp, DHAPT, FRUpts2pp, FRUptspp, GALTptspp, GAMptspp, GLCptspp, LDH_D, MALTptspp, MANGLYCptspp, MANptspp, MNLptspp, SBTptspp, SUCptspp, TREptspp
233	-54.8261	EX_succ_e	10.8056	-10	0.0694611	4	31.7019	-5.75177	27.0716	-3.75903	8.38941	b2415, b3736, b1380, b3093	2DGLCptspp, ACGAptspp, ACMANAptspp, ACMUMptspp, ARBTptspp, ASCBptspp, ATPS4rpp, CELBpts, CHTBSptspp, DHAPT, FRUpts2pp, FRUptspp, GALTptspp, GALURt2rpp, GAMptspp, GLCptspp, LDH_D, MALTptspp, MANGLYCptspp, MANptspp, MNLptspp, SBTptspp, SUCptspp, TREptspp
234	-54.8261	EX_succ_e	10.8056	-10	0.0694611	4	31.7019	-5.75177	27.0716	-3.75903	8.38941	b3091, b2415, b3736, b1380	2DGLCptspp, ACGAptspp, ACMANAptspp, ACMUMptspp, ALTRH, ARBTptspp, ASCBptspp, ATPS4rpp, CELBpts, CHTBSptspp, DHAPT, FRUpts2pp, FRUptspp, GALTptspp, GAMptspp, GLCptspp, LDH_D, MALTptspp, MANGLYCptspp, MANptspp, MNLptspp, SBTptspp, SUCptspp, TREptspp
235	-54.8261	EX_succ_e	10.8056	-10	0.0694611	4	31.7019	-5.75177	27.0716	-3.75903	8.38941	b4122, b2415, b3732, b1380	2DGLCptspp, ACGAptspp, ACMANAptspp, ACMUMptspp, ARBTptspp, ASCBptspp, ATPS4rpp, CELBpts, CHTBSptspp, DHAPT, DTARTD, FRUpts2pp, FRUptspp, GALTptspp, GAMptspp, GLCptspp, LDH_D, MALTptspp, MANGLYCptspp, MANptspp, MNLptspp, SBTptspp, SUCptspp, TREptspp
236	-54.8261	EX_succ_e	10.8056	-10	0.0694611	4	31.7019	-5.75177	27.0716	-3.75903	8.38941	b1854, b2415, b3732, b1380	2DGLCptspp, ACGAptspp, ACMANAptspp, ACMUMptspp, ARBTptspp, ASCBptspp, ATPS4rpp, CELBpts, CHTBSptspp, DHAPT, FRUpts2pp, FRUptspp, GALTptspp, GAMptspp, GLCptspp, LDH_D, MALTptspp, MANGLYCptspp, MANptspp, MNLptspp, PYK2, PYK3, PYK4, PYK6, SBTptspp, SUCptspp, TREptspp
237	-54.8261	EX_succ_e	10.8056	-10	0.0694611	4	31.7019	-5.75177	27.0716	-3.75903	8.38941	b1854, b2415, b3736, b1380	2DGLCptspp, ACGAptspp, ACMANAptspp, ACMUMptspp, ARBTptspp, ASCBptspp, ATPS4rpp, CELBpts, CHTBSptspp, DHAPT, FRUpts2pp, FRUptspp, GALTptspp, GAMptspp, GLCptspp, LDH_D, MALTptspp, MANGLYCptspp, MANptspp, MNLptspp, PYK2, PYK3, PYK4, PYK6, SBTptspp, SUCptspp, TREptspp
238	-54.8261	EX_succ_e	10.8056	-10	0.0694611	4	31.7019	-5.75177	27.0716	-3.75903	8.38941	b2415, b3732, b1380, b0508	2DGLCptspp, ACGAptspp, ACMANAptspp, ACMUMptspp, ARBTptspp, ASCBptspp, ATPS4rpp, CELBpts, CHTBSptspp, DHAPT, FRUpts2pp, FRUptspp, GALTptspp, GAMptspp, GLCptspp, HPYRI, LDH_D, MALTptspp, MANGLYCptspp, MANptspp, MNLptspp, SBTptspp, SUCptspp, TREptspp
239	-54.8261	EX_succ_e	10.8056	-10	0.0694611	4	31.7019	-5.75177	27.0716	-3.75903	8.38941	b2415, b3736, b1380, b0508	2DGLCptspp, ACGAptspp, ACMANAptspp, ACMUMptspp, ARBTptspp, ASCBptspp, ATPS4rpp, CELBpts, CHTBSptspp, DHAPT, FRUpts2pp, FRUptspp, GALTptspp, GAMptspp, GLCptspp, HPYRI, LDH_D, MALTptspp, MANGLYCptspp, MANptspp, MNLptspp, SBTptspp, SUCptspp, TREptspp
240	-54.8261	EX_succ_e	10.8056	-10	0.0694611	4	31.7019	-5.75177	27.0716	-3.75903	8.38941	b3916, b2415, b3732, b1380	2DGLCptspp, ACGAptspp, ACMANAptspp, ACMUMptspp, ARBTptspp, ASCBptspp, ATPS4rpp, CELBpts, CHTBSptspp, DHAPT, FRUpts2pp, FRUptspp, GALTptspp, GAMptspp, GLCptspp, LDH_D, MALTptspp, MANGLYCptspp, MANptspp, MNLptspp, PFK_2, PFK_3, SBTptspp, SUCptspp, TREptspp
241	-54.8261	EX_succ_e	10.8056	-10	0.0694611	4	31.7019	-5.75177	27.0716	-3.75903	8.38941	b3916, b2415, b3736, b1380	2DGLCptspp, ACGAptspp, ACMANAptspp, ACMUMptspp, ARBTptspp, ASCBptspp, ATPS4rpp, CELBpts, CHTBSptspp, DHAPT, FRUpts2pp, FRUptspp, GALTptspp, GAMptspp, GLCptspp, LDH_D, MALTptspp, MANGLYCptspp, MANptspp, MNLptspp, PFK_2, PFK_3, SBTptspp, SUCptspp, TREptspp
242	-54.8261	EX_succ_e	10.8056	-10	0.0694611	4	31.7019	-5.75177	27.0716	-3.75903	8.38941	b2415, b3089, b3732, b1380	2DGLCptspp, ACGAptspp, ACMANAptspp, ACMUMptspp, ARBTptspp, ASCBptspp, ATPS4rpp, CELBpts, CHTBSptspp, DHAPT, FRUpts2pp, FRUptspp, GALTptspp, GAMptspp, GLCptspp, LDH_D, MALTptspp, MANGLYCptspp, MANptspp, MNLptspp, SBTptspp, SERt4pp, SUCptspp, THRt4pp, TREptspp
243	-54.8261	EX_succ_e	10.8056	-10	0.0694611	4	31.7019	-5.75177	27.0716	-3.75903	8.38941	b2415, b3089, b3736, b1380	2DGLCptspp, ACGAptspp, ACMANAptspp, ACMUMptspp, ARBTptspp, ASCBptspp, ATPS4rpp, CELBpts, CHTBSptspp, DHAPT, FRUpts2pp, FRUptspp, GALTptspp, GAMptspp, GLCptspp, LDH_D, MALTptspp, MANGLYCptspp, MANptspp, MNLptspp, SBTptspp, SERt4pp, SUCptspp, THRt4pp, TREptspp
244	-54.8261	EX_succ_e	10.8056	-10	0.0694611	4	31.7019	-5.75177	27.0716	-3.75903	8.38941	b2415, b0112, b3732, b1380	2DGLCptspp, ACGAptspp, ACMANAptspp, ACMUMptspp, ARBTptspp, ASCBptspp, ATPS4rpp, CELBpts, CHTBSptspp, DHAPT, FRUpts2pp, FRUptspp, GALTptspp, GAMptspp, GLCptspp, HISt2rpp, LDH_D, MALTptspp, MANGLYCptspp, MANptspp, MNLptspp, SBTptspp, SUCptspp, TREptspp
245	-54.8261	EX_succ_e	10.8056	-10	0.0694611	4	31.7019	-5.75177	27.0716	-3.75903	8.38941	b2415, b0112, b3736, b1380	2DGLCptspp, ACGAptspp, ACMANAptspp, ACMUMptspp, ARBTptspp, ASCBptspp, ATPS4rpp, CELBpts, CHTBSptspp, DHAPT, FRUpts2pp, FRUptspp, GALTptspp, GAMptspp, GLCptspp, HISt2rpp, LDH_D, MALTptspp, MANGLYCptspp, MANptspp, MNLptspp, SBTptspp, SUCptspp, TREptspp
246	-54.8261	EX_succ_e	10.8056	-10	0.0694611	4	31.7019	-5.75177	27.0716	-3.75903	8.38941	b2415, b3736, b3452, b1380	2DGLCptspp, ACGAptspp, ACMANAptspp, ACMUMptspp, ARBTptspp, ASCBptspp, ATPS4rpp, CELBpts, CHTBSptspp, DHAPT, FRUpts2pp, FRUptspp, G3PCabcpp, G3PEabcpp, G3PGabcpp, G3PIabcpp, G3PSabcpp, GALTptspp, GAMptspp, GLCptspp, GLYC2Pabcpp, GLYC3Pabcpp, LDH_D, MALTptspp, MANGLYCptspp, MANptspp, MNLptspp, SBTptspp, SUCptspp, TREptspp
247	-54.8261	EX_succ_e	10.8056	-10	0.0694611	4	31.7019	-5.75177	27.0716	-3.75903	8.38941	b2415, b3732, b3453, b1380	2DGLCptspp, ACGAptspp, ACMANAptspp, ACMUMptspp, ARBTptspp, ASCBptspp, ATPS4rpp, CELBpts, CHTBSptspp, DHAPT, FRUpts2pp, FRUptspp, G3PCabcpp, G3PEabcpp, G3PGabcpp, G3PIabcpp, G3PSabcpp, GALTptspp, GAMptspp, GLCptspp, GLYC2Pabcpp, GLYC3Pabcpp, LDH_D, MALTptspp, MANGLYCptspp, MANptspp, MNLptspp, SBTptspp, SUCptspp, TREptspp
248	-54.8261	EX_succ_e	10.8056	-10	0.0694611	4	31.7019	-5.75177	27.0716	-3.75903	8.38941	b2415, b3732, b3450, b1380	2DGLCptspp, ACGAptspp, ACMANAptspp, ACMUMptspp, ARBTptspp, ASCBptspp, ATPS4rpp, CELBpts, CHTBSptspp, DHAPT, FRUpts2pp, FRUptspp, G3PCabcpp, G3PEabcpp, G3PGabcpp, G3PIabcpp, G3PSabcpp, GALTptspp, GAMptspp, GLCptspp, GLYC2Pabcpp, GLYC3Pabcpp, LDH_D, MALTptspp, MANGLYCptspp, MANptspp, MNLptspp, SBTptspp, SUCptspp, TREptspp
249	-54.8261	EX_succ_e	10.8056	-10	0.0694611	4	31.7019	-5.75177	27.0716	-3.75903	8.38941	b2415, b3736, b3453, b1380	2DGLCptspp, ACGAptspp, ACMANAptspp, ACMUMptspp, ARBTptspp, ASCBptspp, ATPS4rpp, CELBpts, CHTBSptspp, DHAPT, FRUpts2pp, FRUptspp, G3PCabcpp, G3PEabcpp, G3PGabcpp, G3PIabcpp, G3PSabcpp, GALTptspp, GAMptspp, GLCptspp, GLYC2Pabcpp, GLYC3Pabcpp, LDH_D, MALTptspp, MANGLYCptspp, MANptspp, MNLptspp, SBTptspp, SUCptspp, TREptspp
250	-54.8261	EX_succ_e	10.8056	-10	0.0694611	4	31.7019	-5.75177	27.0716	-3.75903	8.38941	b2415, b3736, b3450, b1380	2DGLCptspp, ACGAptspp, ACMANAptspp, ACMUMptspp, ARBTptspp, ASCBptspp, ATPS4rpp, CELBpts, CHTBSptspp, DHAPT, FRUpts2pp, FRUptspp, G3PCabcpp, G3PEabcpp, G3PGabcpp, G3PIabcpp, G3PSabcpp, GALTptspp, GAMptspp, GLCptspp, GLYC2Pabcpp, GLYC3Pabcpp, LDH_D, MALTptspp, MANGLYCptspp, MANptspp, MNLptspp, SBTptspp, SUCptspp, TREptspp
251	-54.8261	EX_succ_e	10.8056	-10	0.0694611	4	31.7019	-5.75177	27.0716	-3.75903	8.38941	b2415, b3732, b3451, b1380	2DGLCptspp, ACGAptspp, ACMANAptspp, ACMUMptspp, ARBTptspp, ASCBptspp, ATPS4rpp, CELBpts, CHTBSptspp, DHAPT, FRUpts2pp, FRUptspp, G3PCabcpp, G3PEabcpp, G3PGabcpp, G3PIabcpp, G3PSabcpp, GALTptspp, GAMptspp, GLCptspp, GLYC2Pabcpp, GLYC3Pabcpp, LDH_D, MALTptspp, MANGLYCptspp, MANptspp, MNLptspp, SBTptspp, SUCptspp, TREptspp
252	-54.8261	EX_succ_e	10.8056	-10	0.0694611	4	31.7019	-5.75177	27.0716	-3.75903	8.38941	b2415, b3736, b3451, b1380	2DGLCptspp, ACGAptspp, ACMANAptspp, ACMUMptspp, ARBTptspp, ASCBptspp, ATPS4rpp, CELBpts, CHTBSptspp, DHAPT, FRUpts2pp, FRUptspp, G3PCabcpp, G3PEabcpp, G3PGabcpp, G3PIabcpp, G3PSabcpp, GALTptspp, GAMptspp, GLCptspp, GLYC2Pabcpp, GLYC3Pabcpp, LDH_D, MALTptspp, MANGLYCptspp, MANptspp, MNLptspp, SBTptspp, SUCptspp, TREptspp
253	-54.8261	EX_succ_e	10.8056	-10	0.0694611	4	31.7019	-5.75177	27.0716	-3.75903	8.38941	b2415, b3732, b3452, b1380	2DGLCptspp, ACGAptspp, ACMANAptspp, ACMUMptspp, ARBTptspp, ASCBptspp, ATPS4rpp, CELBpts, CHTBSptspp, DHAPT, FRUpts2pp, FRUptspp, G3PCabcpp, G3PEabcpp, G3PGabcpp, G3PIabcpp, G3PSabcpp, GALTptspp, GAMptspp, GLCptspp, GLYC2Pabcpp, GLYC3Pabcpp, LDH_D, MALTptspp, MANGLYCptspp, MANptspp, MNLptspp, SBTptspp, SUCptspp, TREptspp
254	-54.8261	EX_succ_e	10.8056	-10	0.0694611	4	31.7019	-5.75177	27.0716	-3.75903	8.38941	b2415, b3736, b1380, b0662	2DGLCptspp, ACGAptspp, ACMANAptspp, ACMUMptspp, ARBTptspp, ASCBptspp, ATPS4rpp, CELBpts, CHTBSptspp, DHAPT, FRUpts2pp, FRUptspp, GALTptspp, GAMptspp, GLCptspp, LDH_D, MALTptspp, MANGLYCptspp, MANptspp, MNLptspp, OMMBLHXy, SBTptspp, SUCptspp, TREptspp
255	-54.8261	EX_succ_e	10.8056	-10	0.0694611	4	31.7019	-5.75177	27.0716	-3.75903	8.38941	b2415, b3732, b1380, b0662	2DGLCptspp, ACGAptspp, ACMANAptspp, ACMUMptspp, ARBTptspp, ASCBptspp, ATPS4rpp, CELBpts, CHTBSptspp, DHAPT, FRUpts2pp, FRUptspp, GALTptspp, GAMptspp, GLCptspp, LDH_D, MALTptspp, MANGLYCptspp, MANptspp, MNLptspp, OMMBLHXy, SBTptspp, SUCptspp, TREptspp
256	-54.8261	EX_succ_e	10.8056	-10	0.0694611	4	31.7019	-5.75177	27.0716	-3.75903	8.38941	b2415, b3213, b3732, b1380	2DGLCptspp, ACGAptspp, ACMANAptspp, ACMUMptspp, ARBTptspp, ASCBptspp, ATPS4rpp, CELBpts, CHTBSptspp, DHAPT, FRUpts2pp, FRUptspp, GALTptspp, GAMptspp, GLCptspp, GLUSy, LDH_D, MALTptspp, MANGLYCptspp, MANptspp, MNLptspp, SBTptspp, SUCptspp, TREptspp
257	-54.8261	EX_succ_e	10.8056	-10	0.0694611	4	31.7019	-5.75177	27.0716	-3.75903	8.38941	b2415, b3212, b3732, b1380	2DGLCptspp, ACGAptspp, ACMANAptspp, ACMUMptspp, ARBTptspp, ASCBptspp, ATPS4rpp, CELBpts, CHTBSptspp, DHAPT, FRUpts2pp, FRUptspp, GALTptspp, GAMptspp, GLCptspp, GLUSy, LDH_D, MALTptspp, MANGLYCptspp, MANptspp, MNLptspp, SBTptspp, SUCptspp, TREptspp
258	-54.8261	EX_succ_e	10.8056	-10	0.0694611	4	31.7019	-5.75177	27.0716	-3.75903	8.38941	b2415, b3213, b3736, b1380	2DGLCptspp, ACGAptspp, ACMANAptspp, ACMUMptspp, ARBTptspp, ASCBptspp, ATPS4rpp, CELBpts, CHTBSptspp, DHAPT, FRUpts2pp, FRUptspp, GALTptspp, GAMptspp, GLCptspp, GLUSy, LDH_D, MALTptspp, MANGLYCptspp, MANptspp, MNLptspp, SBTptspp, SUCptspp, TREptspp
259	-54.8261	EX_succ_e	10.8056	-10	0.0694611	4	31.7019	-5.75177	27.0716	-3.75903	8.38941	b2415, b3212, b3736, b1380	2DGLCptspp, ACGAptspp, ACMANAptspp, ACMUMptspp, ARBTptspp, ASCBptspp, ATPS4rpp, CELBpts, CHTBSptspp, DHAPT, FRUpts2pp, FRUptspp, GALTptspp, GAMptspp, GLCptspp, GLUSy, LDH_D, MALTptspp, MANGLYCptspp, MANptspp, MNLptspp, SBTptspp, SUCptspp, TREptspp
260	-54.8261	EX_succ_e	10.8056	-10	0.0694611	4	31.7019	-5.75177	27.0716	-3.75903	8.38941	b3416, b2415, b3736, b1380	2DGLCptspp, ACGAptspp, ACMANAptspp, ACMUMptspp, AMALT1, AMALT2, AMALT3, AMALT4, ARBTptspp, ASCBptspp, ATPS4rpp, CELBpts, CHTBSptspp, DHAPT, FRUpts2pp, FRUptspp, GALTptspp, GAMptspp, GLCptspp, LDH_D, MALTptspp, MANGLYCptspp, MANptspp, MNLptspp, SBTptspp, SUCptspp, TREptspp
261	-54.8261	EX_succ_e	10.8056	-10	0.0694611	4	31.7019	-5.75177	27.0716	-3.75903	8.38941	b3416, b2415, b3732, b1380	2DGLCptspp, ACGAptspp, ACMANAptspp, ACMUMptspp, AMALT1, AMALT2, AMALT3, AMALT4, ARBTptspp, ASCBptspp, ATPS4rpp, CELBpts, CHTBSptspp, DHAPT, FRUpts2pp, FRUptspp, GALTptspp, GAMptspp, GLCptspp, LDH_D, MALTptspp, MANGLYCptspp, MANptspp, MNLptspp, SBTptspp, SUCptspp, TREptspp
262	-54.8261	EX_succ_e	10.8056	-10	0.0694611	4	31.7019	-5.75177	27.0716	-3.75903	8.38941	b2415, b3732, b4242, b1380	2DGLCptspp, ACGAptspp, ACMANAptspp, ACMUMptspp, ARBTptspp, ASCBptspp, ATPS4rpp, CELBpts, CHTBSptspp, DHAPT, FRUpts2pp, FRUptspp, GALTptspp, GAMptspp, GLCptspp, LDH_D, MALTptspp, MANGLYCptspp, MANptspp, MG2uabcpp, MNLptspp, SBTptspp, SUCptspp, TREptspp
263	-54.8261	EX_succ_e	10.8056	-10	0.0694611	4	31.7019	-5.75177	27.0716	-3.75903	8.38941	b2415, b3736, b4242, b1380	2DGLCptspp, ACGAptspp, ACMANAptspp, ACMUMptspp, ARBTptspp, ASCBptspp, ATPS4rpp, CELBpts, CHTBSptspp, DHAPT, FRUpts2pp, FRUptspp, GALTptspp, GAMptspp, GLCptspp, LDH_D, MALTptspp, MANGLYCptspp, MANptspp, MG2uabcpp, MNLptspp, SBTptspp, SUCptspp, TREptspp
264	-54.8261	EX_succ_e	10.8056	-10	0.0694611	4	31.7019	-5.75177	27.0716	-3.75903	8.38941	b2415, b4115, b3736, b1380	2DGLCptspp, ACGAptspp, ACMANAptspp, ACMUMptspp, ARBTptspp, ARGAGMt7pp, ASCBptspp, ATPS4rpp, CELBpts, CHTBSptspp, DHAPT, FRUpts2pp, FRUptspp, GALTptspp, GAMptspp, GLCptspp, LDH_D, MALTptspp, MANGLYCptspp, MANptspp, MNLptspp, SBTptspp, SUCptspp, TREptspp
265	-54.8261	EX_succ_e	10.8056	-10	0.0694611	4	31.7019	-5.75177	27.0716	-3.75903	8.38941	b2415, b4115, b3732, b1380	2DGLCptspp, ACGAptspp, ACMANAptspp, ACMUMptspp, ARBTptspp, ARGAGMt7pp, ASCBptspp, ATPS4rpp, CELBpts, CHTBSptspp, DHAPT, FRUpts2pp, FRUptspp, GALTptspp, GAMptspp, GLCptspp, LDH_D, MALTptspp, MANGLYCptspp, MANptspp, MNLptspp, SBTptspp, SUCptspp, TREptspp
266	-54.8261	EX_succ_e	10.8056	-10	0.0694611	4	31.7019	-5.75177	27.0716	-3.75903	8.38941	b2415, b3526, b3732, b1380	2DGLCptspp, ACGAptspp, ACMANAptspp, ACMUMptspp, ARBTptspp, ASCBptspp, ATPS4rpp, CELBpts, CHTBSptspp, DDGLK, DHAPT, FRUpts2pp, FRUptspp, GALTptspp, GAMptspp, GLCptspp, LDH_D, MALTptspp, MANGLYCptspp, MANptspp, MNLptspp, SBTptspp, SUCptspp, TREptspp
267	-54.8261	EX_succ_e	10.8056	-10	0.0694611	4	31.7019	-5.75177	27.0716	-3.75903	8.38941	b2415, b3526, b3736, b1380	2DGLCptspp, ACGAptspp, ACMANAptspp, ACMUMptspp, ARBTptspp, ASCBptspp, ATPS4rpp, CELBpts, CHTBSptspp, DDGLK, DHAPT, FRUpts2pp, FRUptspp, GALTptspp, GAMptspp, GLCptspp, LDH_D, MALTptspp, MANGLYCptspp, MANptspp, MNLptspp, SBTptspp, SUCptspp, TREptspp
268	-54.8261	EX_succ_e	10.8056	-10	0.0694611	4	31.7019	-5.75177	27.0716	-3.75903	8.38941	b2415, b3806, b3732, b1380	2DGLCptspp, ACGAptspp, ACMANAptspp, ACMUMptspp, ADNCYC, ARBTptspp, ASCBptspp, ATPS4rpp, CELBpts, CHTBSptspp, DHAPT, FRUpts2pp, FRUptspp, GALTptspp, GAMptspp, GLCptspp, LDH_D, MALTptspp, MANGLYCptspp, MANptspp, MNLptspp, SBTptspp, SUCptspp, TREptspp
269	-54.8261	EX_succ_e	10.8056	-10	0.0694611	4	31.7019	-5.75177	27.0716	-3.75903	8.38941	b2415, b3806, b3736, b1380	2DGLCptspp, ACGAptspp, ACMANAptspp, ACMUMptspp, ADNCYC, ARBTptspp, ASCBptspp, ATPS4rpp, CELBpts, CHTBSptspp, DHAPT, FRUpts2pp, FRUptspp, GALTptspp, GAMptspp, GLCptspp, LDH_D, MALTptspp, MANGLYCptspp, MANptspp, MNLptspp, SBTptspp, SUCptspp, TREptspp
270	-54.8261	EX_succ_e	10.8056	-10	0.0694611	4	31.7019	-5.75177	27.0716	-3.75903	8.38941	b2415, b3161, b3732, b1380	2DGLCptspp, ACGAptspp, ACMANAptspp, ACMUMptspp, ARBTptspp, ASCBptspp, ATPS4rpp, CELBpts, CHTBSptspp, DHAPT, FRUpts2pp, FRUptspp, GALTptspp, GAMptspp, GLCptspp, INDOLEt2rpp, LDH_D, MALTptspp, MANGLYCptspp, MANptspp, MNLptspp, SBTptspp, SUCptspp, TREptspp
271	-54.8261	EX_succ_e	10.8056	-10	0.0694611	4	31.7019	-5.75177	27.0716	-3.75903	8.38941	b2415, b3161, b3736, b1380	2DGLCptspp, ACGAptspp, ACMANAptspp, ACMUMptspp, ARBTptspp, ASCBptspp, ATPS4rpp, CELBpts, CHTBSptspp, DHAPT, FRUpts2pp, FRUptspp, GALTptspp, GAMptspp, GLCptspp, INDOLEt2rpp, LDH_D, MALTptspp, MANGLYCptspp, MANptspp, MNLptspp, SBTptspp, SUCptspp, TREptspp
272	-54.8261	EX_succ_e	10.8056	-10	0.0694611	4	31.7019	-5.75177	27.0716	-3.75903	8.38941	b2415, b2310, b3732, b1380	2DGLCptspp, ACGAptspp, ACMANAptspp, ACMUMptspp, ARBTptspp, ASCBptspp, ATPS4rpp, CELBpts, CHTBSptspp, DHAPT, FRUpts2pp, FRUptspp, GALTptspp, GAMptspp, GLCptspp, LDH_D, LYSabcpp, MALTptspp, MANGLYCptspp, MANptspp, MNLptspp, ORNabcpp, SBTptspp, SUCptspp, TREptspp
273	-54.8261	EX_succ_e	10.8056	-10	0.0694611	4	31.7019	-5.75177	27.0716	-3.75903	8.38941	b2415, b3732, b0757, b1380	2DGLCptspp, ACGAptspp, ACMANAptspp, ACMUMptspp, ARBTptspp, ASCBptspp, ATPS4rpp, CELBpts, CHTBSptspp, DHAPT, FRUpts2pp, FRUptspp, GALKr, GALTptspp, GAMptspp, GLCptspp, LDH_D, MALTptspp, MANGLYCptspp, MANptspp, MNLptspp, SBTptspp, SUCptspp, TREptspp
274	-54.8261	EX_succ_e	10.8056	-10	0.0694611	4	31.7019	-5.75177	27.0716	-3.75903	8.38941	b2415, b3736, b0757, b1380	2DGLCptspp, ACGAptspp, ACMANAptspp, ACMUMptspp, ARBTptspp, ASCBptspp, ATPS4rpp, CELBpts, CHTBSptspp, DHAPT, FRUpts2pp, FRUptspp, GALKr, GALTptspp, GAMptspp, GLCptspp, LDH_D, MALTptspp, MANGLYCptspp, MANptspp, MNLptspp, SBTptspp, SUCptspp, TREptspp
275	-54.8261	EX_succ_e	10.8056	-10	0.0694611	4	31.7019	-5.75177	27.0716	-3.75903	8.38941	b2415, b0758, b3732, b1380	2DGLCptspp, ACGAptspp, ACMANAptspp, ACMUMptspp, ARBTptspp, ASCBptspp, ATPS4rpp, CELBpts, CHTBSptspp, DHAPT, FRUpts2pp, FRUptspp, GALTptspp, GAMptspp, GLCptspp, LDH_D, MALTptspp, MANGLYCptspp, MANptspp, MNLptspp, SBTptspp, SUCptspp, TREptspp, UGLT
276	-54.8261	EX_succ_e	10.8056	-10	0.0694611	4	31.7019	-5.75177	27.0716	-3.75903	8.38941	b2415, b0758, b3736, b1380	2DGLCptspp, ACGAptspp, ACMANAptspp, ACMUMptspp, ARBTptspp, ASCBptspp, ATPS4rpp, CELBpts, CHTBSptspp, DHAPT, FRUpts2pp, FRUptspp, GALTptspp, GAMptspp, GLCptspp, LDH_D, MALTptspp, MANGLYCptspp, MANptspp, MNLptspp, SBTptspp, SUCptspp, TREptspp, UGLT
277	-54.8261	EX_succ_e	10.8056	-10	0.0694611	4	31.7019	-5.75177	27.0716	-3.75903	8.38941	b2415, b0759, b3736, b1380	2DGLCptspp, ACGAptspp, ACMANAptspp, ACMUMptspp, ARBTptspp, ASCBptspp, ATPS4rpp, CELBpts, CHTBSptspp, DHAPT, FRUpts2pp, FRUptspp, GALTptspp, GAMptspp, GLCptspp, LDH_D, MALTptspp, MANGLYCptspp, MANptspp, MNLptspp, SBTptspp, SUCptspp, TREptspp, UDPG4E
278	-54.8261	EX_succ_e	10.8056	-10	0.0694611	4	31.7019	-5.75177	27.0716	-3.75903	8.38941	b2415, b0507, b3732, b1380	2DGLCptspp, ACGAptspp, ACMANAptspp, ACMUMptspp, ARBTptspp, ASCBptspp, ATPS4rpp, CELBpts, CHTBSptspp, DHAPT, FRUpts2pp, FRUptspp, GALTptspp, GAMptspp, GLCptspp, GLXCL, LDH_D, MALTptspp, MANGLYCptspp, MANptspp, MNLptspp, SBTptspp, SUCptspp, TREptspp
279	-54.8261	EX_succ_e	10.8056	-10	0.0694611	4	31.7019	-5.75177	27.0716	-3.75903	8.38941	b2415, b0507, b3736, b1380	2DGLCptspp, ACGAptspp, ACMANAptspp, ACMUMptspp, ARBTptspp, ASCBptspp, ATPS4rpp, CELBpts, CHTBSptspp, DHAPT, FRUpts2pp, FRUptspp, GALTptspp, GAMptspp, GLCptspp, GLXCL, LDH_D, MALTptspp, MANGLYCptspp, MANptspp, MNLptspp, SBTptspp, SUCptspp, TREptspp
280	-54.8261	EX_succ_e	10.8056	-10	0.0694611	4	31.7019	-5.75177	27.0716	-3.75903	8.38941	b2415, b1192, b3732, b1380	2DGLCptspp, 4PCP, ACGAptspp, ACMANAptspp, ACMUMptspp, AGM4PCP, AM4PCP, ARBTptspp, ASCBptspp, ATPS4rpp, CELBpts, CHTBSptspp, DHAPT, FRUpts2pp, FRUptspp, GALTptspp, GAMptspp, GLCptspp, LDH_D, MALTptspp, MANGLYCptspp, MANptspp, MNLptspp, SBTptspp, SUCptspp, TREptspp, UM4PCP
281	-54.8261	EX_succ_e	10.8056	-10	0.0694611	4	31.7019	-5.75177	27.0716	-3.75903	8.38941	b2415, b1192, b3736, b1380	2DGLCptspp, 4PCP, ACGAptspp, ACMANAptspp, ACMUMptspp, AGM4PCP, AM4PCP, ARBTptspp, ASCBptspp, ATPS4rpp, CELBpts, CHTBSptspp, DHAPT, FRUpts2pp, FRUptspp, GALTptspp, GAMptspp, GLCptspp, LDH_D, MALTptspp, MANGLYCptspp, MANptspp, MNLptspp, SBTptspp, SUCptspp, TREptspp, UM4PCP
282	-54.8261	EX_succ_e	10.8056	-10	0.0694611	4	31.7019	-5.75177	27.0716	-3.75903	8.38941	b2415, b3736, b3005, b1380	2DGLCptspp, ACGAptspp, ACMANAptspp, ACMUMptspp, ADOCBLtonex, ARBTptspp, ASCBptspp, ATPS4rpp, CBItonex, CBL1tonex, CELBpts, CHTBSptspp, CPGNtonex, DHAPT, FE3DCITtonex, FE3DHBZStonex, FE3HOXtonex, FECRMtonex, FEENTERtonex, FEOXAMtonex, FRUpts2pp, FRUptspp, GALTptspp, GAMptspp, GLCptspp, LDH_D, MALTptspp, MANGLYCptspp, MANptspp, MNLptspp, SBTptspp, SUCptspp, TREptspp
283	-54.8261	EX_succ_e	10.8056	-10	0.0694611	4	31.7019	-5.75177	27.0716	-3.75903	8.38941	b1095, b2415, b3732, b1380	2DGLCptspp, 3OAS181, ACGAptspp, ACMANAptspp, ACMUMptspp, ARBTptspp, ASCBptspp, ATPS4rpp, CELBpts, CHTBSptspp, DHAPT, FRUpts2pp, FRUptspp, GALTptspp, GAMptspp, GLCptspp, LDH_D, MALTptspp, MANGLYCptspp, MANptspp, MNLptspp, SBTptspp, SUCptspp, TREptspp
284	-54.8261	EX_succ_e	10.8056	-10	0.0694611	4	31.7019	-5.75177	27.0716	-3.75903	8.38941	b1095, b2415, b3736, b1380	2DGLCptspp, 3OAS181, ACGAptspp, ACMANAptspp, ACMUMptspp, ARBTptspp, ASCBptspp, ATPS4rpp, CELBpts, CHTBSptspp, DHAPT, FRUpts2pp, FRUptspp, GALTptspp, GAMptspp, GLCptspp, LDH_D, MALTptspp, MANGLYCptspp, MANptspp, MNLptspp, SBTptspp, SUCptspp, TREptspp
285	-54.8261	EX_succ_e	10.8056	-10	0.0694611	4	31.7019	-5.75177	27.0716	-3.75903	8.38941	b2415, b3732, b0729, b1380	2DGLCptspp, ACGAptspp, ACMANAptspp, ACMUMptspp, ARBTptspp, ASCBptspp, ATPS4rpp, CELBpts, CHTBSptspp, DHAPT, FRUpts2pp, FRUptspp, GALTptspp, GAMptspp, GLCptspp, LDH_D, MALTptspp, MANGLYCptspp, MANptspp, MNLptspp, SBTptspp, SUCOAS, SUCptspp, TREptspp
286	-54.8261	EX_succ_e	10.8056	-10	0.0694611	4	31.7019	-5.75177	27.0716	-3.75903	8.38941	b2415, b3736, b0728, b1380	2DGLCptspp, ACGAptspp, ACMANAptspp, ACMUMptspp, ARBTptspp, ASCBptspp, ATPS4rpp, CELBpts, CHTBSptspp, DHAPT, FRUpts2pp, FRUptspp, GALTptspp, GAMptspp, GLCptspp, LDH_D, MALTptspp, MANGLYCptspp, MANptspp, MNLptspp, SBTptspp, SUCOAS, SUCptspp, TREptspp
287	-54.8261	EX_succ_e	10.8056	-10	0.0694611	4	31.7019	-5.75177	27.0716	-3.75903	8.38941	b2415, b3736, b0729, b1380	2DGLCptspp, ACGAptspp, ACMANAptspp, ACMUMptspp, ARBTptspp, ASCBptspp, ATPS4rpp, CELBpts, CHTBSptspp, DHAPT, FRUpts2pp, FRUptspp, GALTptspp, GAMptspp, GLCptspp, LDH_D, MALTptspp, MANGLYCptspp, MANptspp, MNLptspp, SBTptspp, SUCOAS, SUCptspp, TREptspp
288	-54.8261	EX_succ_e	10.8056	-10	0.0694611	4	31.7019	-5.75177	27.0716	-3.75903	8.38941	b2415, b3732, b0728, b1380	2DGLCptspp, ACGAptspp, ACMANAptspp, ACMUMptspp, ARBTptspp, ASCBptspp, ATPS4rpp, CELBpts, CHTBSptspp, DHAPT, FRUpts2pp, FRUptspp, GALTptspp, GAMptspp, GLCptspp, LDH_D, MALTptspp, MANGLYCptspp, MANptspp, MNLptspp, SBTptspp, SUCOAS, SUCptspp, TREptspp
289	-54.8261	EX_succ_e	10.8056	-10	0.0694611	4	31.7019	-5.75177	27.0716	-3.75903	8.38941	b2690, b2415, b3732, b1380	2DGLCptspp, ACGAptspp, ACMANAptspp, ACMUMptspp, ALKP, ARBTptspp, ASCBptspp, ATPS4rpp, CELBpts, CHTBSptspp, DHAPT, FRUpts2pp, FRUptspp, GALTptspp, GAMptspp, GLCptspp, LDH_D, MALTptspp, MANGLYCptspp, MANptspp, MNLptspp, SBTptspp, SUCptspp, TREptspp
290	-54.8261	EX_succ_e	10.8056	-10	0.0694611	4	31.7019	-5.75177	27.0716	-3.75903	8.38941	b2415, b4139, b3732, b1380	2DGLCptspp, ACGAptspp, ACMANAptspp, ACMUMptspp, ARBTptspp, ASCBptspp, ASPT, ATPS4rpp, CELBpts, CHTBSptspp, DHAPT, FRUpts2pp, FRUptspp, GALTptspp, GAMptspp, GLCptspp, LDH_D, MALTptspp, MANGLYCptspp, MANptspp, MNLptspp, SBTptspp, SUCptspp, TREptspp
291	-54.8261	EX_succ_e	10.8056	-10	0.0694611	4	31.7019	-5.75177	27.0716	-3.75903	8.38941	b2415, b4139, b3736, b1380	2DGLCptspp, ACGAptspp, ACMANAptspp, ACMUMptspp, ARBTptspp, ASCBptspp, ASPT, ATPS4rpp, CELBpts, CHTBSptspp, DHAPT, FRUpts2pp, FRUptspp, GALTptspp, GAMptspp, GLCptspp, LDH_D, MALTptspp, MANGLYCptspp, MANptspp, MNLptspp, SBTptspp, SUCptspp, TREptspp
292	-54.8261	EX_succ_e	10.8056	-10	0.0694611	4	31.7019	-5.75177	27.0716	-3.75903	8.38941	b2415, b0110, b3732, b1380	2DGLCptspp, ACGAptspp, ACMANAptspp, ACMUMptspp, AGM3PA, AGM4PA, AM3PA, AM4PA, ARBTptspp, ASCBptspp, ATPS4rpp, CELBpts, CHTBSptspp, DHAPT, FRUpts2pp, FRUptspp, GALTptspp, GAMptspp, GLCptspp, LDH_D, MALTptspp, MANGLYCptspp, MANptspp, MNLptspp, SBTptspp, SUCptspp, TREptspp
293	-54.8261	EX_succ_e	10.8056	-10	0.0694611	4	31.7019	-5.75177	27.0716	-3.75903	8.38941	b2415, b0110, b3736, b1380	2DGLCptspp, ACGAptspp, ACMANAptspp, ACMUMptspp, AGM3PA, AGM4PA, AM3PA, AM4PA, ARBTptspp, ASCBptspp, ATPS4rpp, CELBpts, CHTBSptspp, DHAPT, FRUpts2pp, FRUptspp, GALTptspp, GAMptspp, GLCptspp, LDH_D, MALTptspp, MANGLYCptspp, MANptspp, MNLptspp, SBTptspp, SUCptspp, TREptspp
294	-54.8261	EX_succ_e	10.8056	-10	0.0694611	4	31.7019	-5.75177	27.0716	-3.75903	8.38941	b2415, b0589, b3732, b1380	2DGLCptspp, ACGAptspp, ACMANAptspp, ACMUMptspp, ARBTptspp, ASCBptspp, ATPS4rpp, CELBpts, CHTBSptspp, DHAPT, DHBSZ3FEabcpp, FEENTERabcpp, FRUpts2pp, FRUptspp, GALTptspp, GAMptspp, GLCptspp, LDH_D, MALTptspp, MANGLYCptspp, MANptspp, MNLptspp, SBTptspp, SUCptspp, TREptspp
295	-54.8261	EX_succ_e	10.8056	-10	0.0694611	4	31.7019	-5.75177	27.0716	-3.75903	8.38941	b2415, b0588, b3732, b1380	2DGLCptspp, ACGAptspp, ACMANAptspp, ACMUMptspp, ARBTptspp, ASCBptspp, ATPS4rpp, CELBpts, CHTBSptspp, DHAPT, DHBSZ3FEabcpp, FEENTERabcpp, FRUpts2pp, FRUptspp, GALTptspp, GAMptspp, GLCptspp, LDH_D, MALTptspp, MANGLYCptspp, MANptspp, MNLptspp, SBTptspp, SUCptspp, TREptspp
296	-54.8261	EX_succ_e	10.8056	-10	0.0694611	4	31.7019	-5.75177	27.0716	-3.75903	8.38941	b2415, b0589, b3736, b1380	2DGLCptspp, ACGAptspp, ACMANAptspp, ACMUMptspp, ARBTptspp, ASCBptspp, ATPS4rpp, CELBpts, CHTBSptspp, DHAPT, DHBSZ3FEabcpp, FEENTERabcpp, FRUpts2pp, FRUptspp, GALTptspp, GAMptspp, GLCptspp, LDH_D, MALTptspp, MANGLYCptspp, MANptspp, MNLptspp, SBTptspp, SUCptspp, TREptspp
297	-54.8261	EX_succ_e	10.8056	-10	0.0694611	4	31.7019	-5.75177	27.0716	-3.75903	8.38941	b2415, b0592, b3732, b1380	2DGLCptspp, ACGAptspp, ACMANAptspp, ACMUMptspp, ARBTptspp, ASCBptspp, ATPS4rpp, CELBpts, CHTBSptspp, DHAPT, DHBSZ3FEabcpp, FEENTERabcpp, FRUpts2pp, FRUptspp, GALTptspp, GAMptspp, GLCptspp, LDH_D, MALTptspp, MANGLYCptspp, MANptspp, MNLptspp, SBTptspp, SUCptspp, TREptspp
298	-54.8261	EX_succ_e	10.8056	-10	0.0694611	4	31.7019	-5.75177	27.0716	-3.75903	8.38941	b2415, b3732, b0584, b1380	2DGLCptspp, ACGAptspp, ACMANAptspp, ACMUMptspp, ARBTptspp, ASCBptspp, ATPS4rpp, CELBpts, CHTBSptspp, DHAPT, FEENTERtonex, FRUpts2pp, FRUptspp, GALTptspp, GAMptspp, GLCptspp, LDH_D, MALTptspp, MANGLYCptspp, MANptspp, MNLptspp, SBTptspp, SUCptspp, TREptspp
299	-54.8261	EX_succ_e	10.8056	-10	0.0694611	4	31.7019	-5.75177	27.0716	-3.75903	8.38941	b2415, b0592, b3736, b1380	2DGLCptspp, ACGAptspp, ACMANAptspp, ACMUMptspp, ARBTptspp, ASCBptspp, ATPS4rpp, CELBpts, CHTBSptspp, DHAPT, DHBSZ3FEabcpp, FEENTERabcpp, FRUpts2pp, FRUptspp, GALTptspp, GAMptspp, GLCptspp, LDH_D, MALTptspp, MANGLYCptspp, MANptspp, MNLptspp, SBTptspp, SUCptspp, TREptspp
300	-54.8261	EX_succ_e	10.8056	-10	0.0694611	4	31.7019	-5.75177	27.0716	-3.75903	8.38941	b2415, b0590, b3732, b1380	2DGLCptspp, ACGAptspp, ACMANAptspp, ACMUMptspp, ARBTptspp, ASCBptspp, ATPS4rpp, CELBpts, CHTBSptspp, DHAPT, DHBSZ3FEabcpp, FEENTERabcpp, FRUpts2pp, FRUptspp, GALTptspp, GAMptspp, GLCptspp, LDH_D, MALTptspp, MANGLYCptspp, MANptspp, MNLptspp, SBTptspp, SUCptspp, TREptspp
301	-54.8261	EX_succ_e	10.8056	-10	0.0694611	4	31.7019	-5.75177	27.0716	-3.75903	8.38941	b2415, b3736, b0584, b1380	2DGLCptspp, ACGAptspp, ACMANAptspp, ACMUMptspp, ARBTptspp, ASCBptspp, ATPS4rpp, CELBpts, CHTBSptspp, DHAPT, FEENTERtonex, FRUpts2pp, FRUptspp, GALTptspp, GAMptspp, GLCptspp, LDH_D, MALTptspp, MANGLYCptspp, MANptspp, MNLptspp, SBTptspp, SUCptspp, TREptspp
302	-54.8261	EX_succ_e	10.8056	-10	0.0694611	4	31.7019	-5.75177	27.0716	-3.75903	8.38941	b2415, b0590, b3736, b1380	2DGLCptspp, ACGAptspp, ACMANAptspp, ACMUMptspp, ARBTptspp, ASCBptspp, ATPS4rpp, CELBpts, CHTBSptspp, DHAPT, DHBSZ3FEabcpp, FEENTERabcpp, FRUpts2pp, FRUptspp, GALTptspp, GAMptspp, GLCptspp, LDH_D, MALTptspp, MANGLYCptspp, MANptspp, MNLptspp, SBTptspp, SUCptspp, TREptspp
303	-54.8261	EX_succ_e	10.8056	-10	0.0694611	4	31.7019	-5.75177	27.0716	-3.75903	8.38941	b2415, b0588, b3736, b1380	2DGLCptspp, ACGAptspp, ACMANAptspp, ACMUMptspp, ARBTptspp, ASCBptspp, ATPS4rpp, CELBpts, CHTBSptspp, DHAPT, DHBSZ3FEabcpp, FEENTERabcpp, FRUpts2pp, FRUptspp, GALTptspp, GAMptspp, GLCptspp, LDH_D, MALTptspp, MANGLYCptspp, MANptspp, MNLptspp, SBTptspp, SUCptspp, TREptspp
304	-54.8261	EX_succ_e	10.8056	-10	0.0694611	4	31.7019	-5.75177	27.0716	-3.75903	8.38941	b2415, b3732, b3409, b1380	2DGLCptspp, ACGAptspp, ACMANAptspp, ACMUMptspp, ARBTptspp, ASCBptspp, ATPS4rpp, CELBpts, CHTBSptspp, DHAPT, FE2abcpp, FRUpts2pp, FRUptspp, GALTptspp, GAMptspp, GLCptspp, LDH_D, MALTptspp, MANGLYCptspp, MANptspp, MNLptspp, SBTptspp, SUCptspp, TREptspp
305	-54.8261	EX_succ_e	10.8056	-10	0.0694611	4	31.7019	-5.75177	27.0716	-3.75903	8.38941	b2415, b3732, b1727, b1380	2DGLCptspp, ACGAptspp, ACMANAptspp, ACMUMptspp, ARBTptspp, ASCBptspp, ATPS4rpp, CELBpts, CHTBSptspp, DHAPT, FRUpts2pp, FRUptspp, GALTptspp, GAMptspp, GAPP, GLCptspp, LDH_D, MALTptspp, MANGLYCptspp, MANptspp, MNLptspp, SBTptspp, SUCptspp, TREptspp
306	-54.8261	EX_succ_e	10.8056	-10	0.0694611	4	31.7019	-5.75177	27.0716	-3.75903	8.38941	b2415, b3736, b1727, b1380	2DGLCptspp, ACGAptspp, ACMANAptspp, ACMUMptspp, ARBTptspp, ASCBptspp, ATPS4rpp, CELBpts, CHTBSptspp, DHAPT, FRUpts2pp, FRUptspp, GALTptspp, GAMptspp, GAPP, GLCptspp, LDH_D, MALTptspp, MANGLYCptspp, MANptspp, MNLptspp, SBTptspp, SUCptspp, TREptspp
307	-54.8261	EX_succ_e	10.8056	-10	0.0694611	4	31.7019	-5.75177	27.0716	-3.75903	8.38941	b3614, b2415, b3736, b1380	2DGLCptspp, ACGAptspp, ACMANAptspp, ACMUMptspp, ARBTptspp, ASCBptspp, ATPS4rpp, CDPPH, CELBpts, CHTBSptspp, DHAPT, FRUpts2pp, FRUptspp, GALTptspp, GAMptspp, GLCptspp, LDH_D, MALTptspp, MANGLYCptspp, MANptspp, MNLptspp, NDP7, SBTptspp, SUCptspp, TREptspp
308	-54.8261	EX_succ_e	10.8056	-10	0.0694611	4	31.7019	-5.75177	27.0716	-3.75903	8.38941	b3614, b2415, b3732, b1380	2DGLCptspp, ACGAptspp, ACMANAptspp, ACMUMptspp, ARBTptspp, ASCBptspp, ATPS4rpp, CDPPH, CELBpts, CHTBSptspp, DHAPT, FRUpts2pp, FRUptspp, GALTptspp, GAMptspp, GLCptspp, LDH_D, MALTptspp, MANGLYCptspp, MANptspp, MNLptspp, NDP7, SBTptspp, SUCptspp, TREptspp
309	-54.8261	EX_succ_e	10.8056	-10	0.0694611	4	31.7019	-5.75177	27.0716	-3.75903	8.38941	b2415, b3565, b3732, b1380	2DGLCptspp, ACGAptspp, ACMANAptspp, ACMUMptspp, ARBTptspp, ASCBptspp, ATPS4rpp, CELBpts, CHTBSptspp, DHAPT, FRUpts2pp, FRUptspp, GALTptspp, GAMptspp, GLCptspp, LDH_D, MALTptspp, MANGLYCptspp, MANptspp, MNLptspp, SBTptspp, SUCptspp, TREptspp, XYLI1, XYLI2
310	-54.8261	EX_succ_e	10.8056	-10	0.0694611	4	31.7019	-5.75177	27.0716	-3.75903	8.38941	b2415, b3565, b3736, b1380	2DGLCptspp, ACGAptspp, ACMANAptspp, ACMUMptspp, ARBTptspp, ASCBptspp, ATPS4rpp, CELBpts, CHTBSptspp, DHAPT, FRUpts2pp, FRUptspp, GALTptspp, GAMptspp, GLCptspp, LDH_D, MALTptspp, MANGLYCptspp, MANptspp, MNLptspp, SBTptspp, SUCptspp, TREptspp, XYLI1, XYLI2
311	-54.8261	EX_succ_e	10.8056	-10	0.0694611	4	31.7019	-5.75177	27.0716	-3.75903	8.38941	b4117, b2415, b3732, b1380	2DGLCptspp, ACGAptspp, ACMANAptspp, ACMUMptspp, ARBTptspp, ARGDC, ASCBptspp, ATPS4rpp, CELBpts, CHTBSptspp, DHAPT, FRUpts2pp, FRUptspp, GALTptspp, GAMptspp, GLCptspp, LDH_D, MALTptspp, MANGLYCptspp, MANptspp, MNLptspp, SBTptspp, SUCptspp, TREptspp
312	-54.8261	EX_succ_e	10.8056	-10	0.0694611	4	31.7019	-5.75177	27.0716	-3.75903	8.38941	b4117, b2415, b3736, b1380	2DGLCptspp, ACGAptspp, ACMANAptspp, ACMUMptspp, ARBTptspp, ARGDC, ASCBptspp, ATPS4rpp, CELBpts, CHTBSptspp, DHAPT, FRUpts2pp, FRUptspp, GALTptspp, GAMptspp, GLCptspp, LDH_D, MALTptspp, MANGLYCptspp, MANptspp, MNLptspp, SBTptspp, SUCptspp, TREptspp
313	-54.8261	EX_succ_e	10.8056	-10	0.0694611	4	31.7019	-5.75177	27.0716	-3.75903	8.38941	b1850, b2415, b3732, b1380	2DGLCptspp, ACGAptspp, ACMANAptspp, ACMUMptspp, ARBTptspp, ASCBptspp, ATPS4rpp, CELBpts, CHTBSptspp, DHAPT, EDA, FRUpts2pp, FRUptspp, GALTptspp, GAMptspp, GLCptspp, LDH_D, MALTptspp, MANGLYCptspp, MANptspp, MNLptspp, OAADC, SBTptspp, SUCptspp, TREptspp
314	-54.8261	EX_succ_e	10.8056	-10	0.0694611	4	31.7019	-5.75177	27.0716	-3.75903	8.38941	b2415, b4015, b3732, b1380	2DGLCptspp, ACGAptspp, ACMANAptspp, ACMUMptspp, ARBTptspp, ASCBptspp, ATPS4rpp, CELBpts, CHTBSptspp, DHAPT, FRUpts2pp, FRUptspp, GALTptspp, GAMptspp, GLCptspp, ICL, LDH_D, MALTptspp, MANGLYCptspp, MANptspp, MNLptspp, SBTptspp, SUCptspp, TREptspp
315	-54.8261	EX_succ_e	10.8056	-10	0.0694611	4	31.7019	-5.75177	27.0716	-3.75903	8.38941	b2415, b4015, b3736, b1380	2DGLCptspp, ACGAptspp, ACMANAptspp, ACMUMptspp, ARBTptspp, ASCBptspp, ATPS4rpp, CELBpts, CHTBSptspp, DHAPT, FRUpts2pp, FRUptspp, GALTptspp, GAMptspp, GLCptspp, ICL, LDH_D, MALTptspp, MANGLYCptspp, MANptspp, MNLptspp, SBTptspp, SUCptspp, TREptspp
316	-54.8261	EX_succ_e	10.8056	-10	0.0694611	4	31.7019	-5.75177	27.0716	-3.75903	8.38941	b2415, b2799, b3736, b1380	2DGLCptspp, ACGAptspp, ACMANAptspp, ACMUMptspp, ARBTptspp, ASCBptspp, ATPS4rpp, CELBpts, CHTBSptspp, DHAPT, FRUpts2pp, FRUptspp, GALTptspp, GAMptspp, GLCptspp, LCARS, LDH_D, MALTptspp, MANGLYCptspp, MANptspp, MNLptspp, SBTptspp, SUCptspp, TREptspp
317	-54.8261	EX_succ_e	10.8056	-10	0.0694611	4	31.7019	-5.75177	27.0716	-3.75903	8.38941	b2415, b3736, b2201, b1380	2DGLCptspp, ACGAptspp, ACMANAptspp, ACMUMptspp, ARBTptspp, ASCBptspp, ATPS4rpp, CELBpts, CHTBSptspp, DHAPT, FRUpts2pp, FRUptspp, GALTptspp, GAMptspp, GLCptspp, LDH_D, MALTptspp, MANGLYCptspp, MANptspp, MNLptspp, PHEMEabcpp, SBTptspp, SUCptspp, TREptspp
318	-54.8261	EX_succ_e	10.8056	-10	0.0694611	4	31.7019	-5.75177	27.0716	-3.75903	8.38941	b2415, b3732, b2199, b1380	2DGLCptspp, ACGAptspp, ACMANAptspp, ACMUMptspp, ARBTptspp, ASCBptspp, ATPS4rpp, CELBpts, CHTBSptspp, DHAPT, FRUpts2pp, FRUptspp, GALTptspp, GAMptspp, GLCptspp, LDH_D, MALTptspp, MANGLYCptspp, MANptspp, MNLptspp, PHEMEabcpp, SBTptspp, SUCptspp, TREptspp
319	-54.8261	EX_succ_e	10.8056	-10	0.0694611	4	31.7019	-5.75177	27.0716	-3.75903	8.38941	b2415, b3732, b2198, b1380	2DGLCptspp, ACGAptspp, ACMANAptspp, ACMUMptspp, ARBTptspp, ASCBptspp, ATPS4rpp, CELBpts, CHTBSptspp, DHAPT, FRUpts2pp, FRUptspp, GALTptspp, GAMptspp, GLCptspp, LDH_D, MALTptspp, MANGLYCptspp, MANptspp, MNLptspp, PHEMEabcpp, SBTptspp, SUCptspp, TREptspp
320	-54.8261	EX_succ_e	10.8056	-10	0.0694611	4	31.7019	-5.75177	27.0716	-3.75903	8.38941	b2415, b3732, b2200, b1380	2DGLCptspp, ACGAptspp, ACMANAptspp, ACMUMptspp, ARBTptspp, ASCBptspp, ATPS4rpp, CELBpts, CHTBSptspp, DHAPT, FRUpts2pp, FRUptspp, GALTptspp, GAMptspp, GLCptspp, LDH_D, MALTptspp, MANGLYCptspp, MANptspp, MNLptspp, PHEMEabcpp, SBTptspp, SUCptspp, TREptspp
321	-54.8261	EX_succ_e	10.8056	-10	0.0694611	4	31.7019	-5.75177	27.0716	-3.75903	8.38941	b2415, b3736, b2200, b1380	2DGLCptspp, ACGAptspp, ACMANAptspp, ACMUMptspp, ARBTptspp, ASCBptspp, ATPS4rpp, CELBpts, CHTBSptspp, DHAPT, FRUpts2pp, FRUptspp, GALTptspp, GAMptspp, GLCptspp, LDH_D, MALTptspp, MANGLYCptspp, MANptspp, MNLptspp, PHEMEabcpp, SBTptspp, SUCptspp, TREptspp
322	-54.8261	EX_succ_e	10.8056	-10	0.0694611	4	31.7019	-5.75177	27.0716	-3.75903	8.38941	b2415, b3732, b2197, b1380	2DGLCptspp, ACGAptspp, ACMANAptspp, ACMUMptspp, ARBTptspp, ASCBptspp, ATPS4rpp, CELBpts, CHTBSptspp, DHAPT, FRUpts2pp, FRUptspp, GALTptspp, GAMptspp, GLCptspp, LDH_D, MALTptspp, MANGLYCptspp, MANptspp, MNLptspp, PHEMEabcpp, SBTptspp, SUCptspp, TREptspp
323	-54.8261	EX_succ_e	10.8056	-10	0.0694611	4	31.7019	-5.75177	27.0716	-3.75903	8.38941	b1896, b2415, b3732, b1380	2DGLCptspp, ACGAptspp, ACMANAptspp, ACMUMptspp, ARBTptspp, ASCBptspp, ATPS4rpp, CELBpts, CHTBSptspp, DHAPT, FRUpts2pp, FRUptspp, GALTptspp, GAMptspp, GLCptspp, LDH_D, MALTptspp, MANGLYCptspp, MANptspp, MNLptspp, SBTptspp, SUCptspp, TRE6PS, TREptspp
324	-54.8261	EX_succ_e	10.8056	-10	0.0694611	4	31.7019	-5.75177	27.0716	-3.75903	8.38941	b1896, b2415, b3736, b1380	2DGLCptspp, ACGAptspp, ACMANAptspp, ACMUMptspp, ARBTptspp, ASCBptspp, ATPS4rpp, CELBpts, CHTBSptspp, DHAPT, FRUpts2pp, FRUptspp, GALTptspp, GAMptspp, GLCptspp, LDH_D, MALTptspp, MANGLYCptspp, MANptspp, MNLptspp, SBTptspp, SUCptspp, TRE6PS, TREptspp
325	-54.8261	EX_succ_e	10.8056	-10	0.0694611	4	31.7019	-5.75177	27.0716	-3.75903	8.38941	b2415, b3732, b1380, b0404	2DGLCptspp, ACGAptspp, ACMANAptspp, ACMUMptspp, ARBTptspp, ASCBptspp, ATPS4rpp, CELBpts, CHTBSptspp, DHAPT, FA100ACPHi, FA120ACPHi, FA140ACPHi, FA141ACPHi, FA160ACPHi, FA161ACPHi, FA80ACPHi, FRUpts2pp, FRUptspp, GALTptspp, GAMptspp, GLCptspp, LDH_D, MALTptspp, MANGLYCptspp, MANptspp, MNLptspp, SBTptspp, SUCptspp, TREptspp
326	-54.8261	EX_succ_e	10.8056	-10	0.0694611	4	31.7019	-5.75177	27.0716	-3.75903	8.38941	b2415, b3736, b1380, b0404	2DGLCptspp, ACGAptspp, ACMANAptspp, ACMUMptspp, ARBTptspp, ASCBptspp, ATPS4rpp, CELBpts, CHTBSptspp, DHAPT, FA100ACPHi, FA120ACPHi, FA140ACPHi, FA141ACPHi, FA160ACPHi, FA161ACPHi, FA80ACPHi, FRUpts2pp, FRUptspp, GALTptspp, GAMptspp, GLCptspp, LDH_D, MALTptspp, MANGLYCptspp, MANptspp, MNLptspp, SBTptspp, SUCptspp, TREptspp
327	-54.8261	EX_succ_e	10.8056	-10	0.0694611	4	31.7019	-5.75177	27.0716	-3.75903	8.38941	b2415, b3732, b1380, b4321	2DGLCptspp, ACGAptspp, ACMANAptspp, ACMUMptspp, ARBTptspp, ASCBptspp, ATPS4rpp, CELBpts, CHTBSptspp, DHAPT, FRUURt2rpp, FRUpts2pp, FRUptspp, GALTptspp, GAMptspp, GLCptspp, LDH_D, MALTptspp, MANGLYCptspp, MANptspp, MNLptspp, SBTptspp, SUCptspp, TREptspp
328	-54.8261	EX_succ_e	10.8056	-10	0.0694611	4	31.7019	-5.75177	27.0716	-3.75903	8.38941	b2415, b3736, b1380, b4321	2DGLCptspp, ACGAptspp, ACMANAptspp, ACMUMptspp, ARBTptspp, ASCBptspp, ATPS4rpp, CELBpts, CHTBSptspp, DHAPT, FRUURt2rpp, FRUpts2pp, FRUptspp, GALTptspp, GAMptspp, GLCptspp, LDH_D, MALTptspp, MANGLYCptspp, MANptspp, MNLptspp, SBTptspp, SUCptspp, TREptspp
329	-54.8261	EX_succ_e	10.8056	-10	0.0694611	4	31.7019	-5.75177	27.0716	-3.75903	8.38941	b2415, b3732, b0697, b1380	2DGLCptspp, ACGAptspp, ACMANAptspp, ACMUMptspp, ARBTptspp, ASCBptspp, ATPS4rpp, CELBpts, CHTBSptspp, DHAPT, FRUpts2pp, FRUptspp, GALTptspp, GAMptspp, GLCptspp, Kabcpp, LDH_D, MALTptspp, MANGLYCptspp, MANptspp, MNLptspp, SBTptspp, SUCptspp, TREptspp
330	-54.8261	EX_succ_e	10.8056	-10	0.0694611	4	31.7019	-5.75177	27.0716	-3.75903	8.38941	b2415, b3732, b0696, b1380	2DGLCptspp, ACGAptspp, ACMANAptspp, ACMUMptspp, ARBTptspp, ASCBptspp, ATPS4rpp, CELBpts, CHTBSptspp, DHAPT, FRUpts2pp, FRUptspp, GALTptspp, GAMptspp, GLCptspp, Kabcpp, LDH_D, MALTptspp, MANGLYCptspp, MANptspp, MNLptspp, SBTptspp, SUCptspp, TREptspp
331	-54.8261	EX_succ_e	10.8056	-10	0.0694611	4	31.7019	-5.75177	27.0716	-3.75903	8.38941	b2415, b3736, b0696, b1380	2DGLCptspp, ACGAptspp, ACMANAptspp, ACMUMptspp, ARBTptspp, ASCBptspp, ATPS4rpp, CELBpts, CHTBSptspp, DHAPT, FRUpts2pp, FRUptspp, GALTptspp, GAMptspp, GLCptspp, Kabcpp, LDH_D, MALTptspp, MANGLYCptspp, MANptspp, MNLptspp, SBTptspp, SUCptspp, TREptspp
332	-54.8261	EX_succ_e	10.8056	-10	0.0694611	4	31.7019	-5.75177	27.0716	-3.75903	8.38941	b2415, b3732, b0698, b1380	2DGLCptspp, ACGAptspp, ACMANAptspp, ACMUMptspp, ARBTptspp, ASCBptspp, ATPS4rpp, CELBpts, CHTBSptspp, DHAPT, FRUpts2pp, FRUptspp, GALTptspp, GAMptspp, GLCptspp, Kabcpp, LDH_D, MALTptspp, MANGLYCptspp, MANptspp, MNLptspp, SBTptspp, SUCptspp, TREptspp
333	-54.8261	EX_succ_e	10.8056	-10	0.0694611	4	31.7019	-5.75177	27.0716	-3.75903	8.38941	b2415, b3736, b0697, b1380	2DGLCptspp, ACGAptspp, ACMANAptspp, ACMUMptspp, ARBTptspp, ASCBptspp, ATPS4rpp, CELBpts, CHTBSptspp, DHAPT, FRUpts2pp, FRUptspp, GALTptspp, GAMptspp, GLCptspp, Kabcpp, LDH_D, MALTptspp, MANGLYCptspp, MANptspp, MNLptspp, SBTptspp, SUCptspp, TREptspp
334	-54.8261	EX_succ_e	10.8056	-10	0.0694611	4	31.7019	-5.75177	27.0716	-3.75903	8.38941	b2415, b2802, b3732, b1380	2DGLCptspp, ACGAptspp, ACMANAptspp, ACMUMptspp, ARABDI, ARBTptspp, ASCBptspp, ATPS4rpp, CELBpts, CHTBSptspp, DHAPT, FCI, FRUpts2pp, FRUptspp, GALTptspp, GAMptspp, GLCptspp, LDH_D, MALTptspp, MANGLYCptspp, MANptspp, MNLptspp, SBTptspp, SUCptspp, TREptspp
335	-54.8261	EX_succ_e	10.8056	-10	0.0694611	4	31.7019	-5.75177	27.0716	-3.75903	8.38941	b2415, b2802, b3736, b1380	2DGLCptspp, ACGAptspp, ACMANAptspp, ACMUMptspp, ARABDI, ARBTptspp, ASCBptspp, ATPS4rpp, CELBpts, CHTBSptspp, DHAPT, FCI, FRUpts2pp, FRUptspp, GALTptspp, GAMptspp, GLCptspp, LDH_D, MALTptspp, MANGLYCptspp, MANptspp, MNLptspp, SBTptspp, SUCptspp, TREptspp
336	-54.8261	EX_succ_e	10.8056	-10	0.0694611	4	31.7019	-5.75177	27.0716	-3.75903	8.38941	b2415, b2803, b3736, b1380	2DGLCptspp, ACGAptspp, ACMANAptspp, ACMUMptspp, ARBTptspp, ASCBptspp, ATPS4rpp, CELBpts, CHTBSptspp, DHAPT, FCLK, FRUpts2pp, FRUptspp, GALTptspp, GAMptspp, GLCptspp, LDH_D, MALTptspp, MANGLYCptspp, MANptspp, MNLptspp, SBTptspp, SUCptspp, TREptspp
337	-54.8261	EX_succ_e	10.8056	-10	0.0694611	4	31.7019	-5.75177	27.0716	-3.75903	8.38941	b2415, b3736, b2801, b1380	2DGLCptspp, ACGAptspp, ACMANAptspp, ACMUMptspp, ARBTptspp, ASCBptspp, ATPS4rpp, CELBpts, CHTBSptspp, DHAPT, FRUpts2pp, FRUptspp, FUCtpp, GALTptspp, GAMptspp, GLCptspp, LDH_D, MALTptspp, MANGLYCptspp, MANptspp, MNLptspp, SBTptspp, SUCptspp, TREptspp
338	-54.8261	EX_succ_e	10.8056	-10	0.0694611	4	31.7019	-5.75177	27.0716	-3.75903	8.38941	b2415, b2803, b3732, b1380	2DGLCptspp, ACGAptspp, ACMANAptspp, ACMUMptspp, ARBTptspp, ASCBptspp, ATPS4rpp, CELBpts, CHTBSptspp, DHAPT, FCLK, FRUpts2pp, FRUptspp, GALTptspp, GAMptspp, GLCptspp, LDH_D, MALTptspp, MANGLYCptspp, MANptspp, MNLptspp, SBTptspp, SUCptspp, TREptspp
339	-54.8261	EX_succ_e	10.8056	-10	0.0694611	4	31.7019	-5.75177	27.0716	-3.75903	8.38941	b2415, b0104, b3732, b1380	2DGLCptspp, ACGAptspp, ACMANAptspp, ACMUMptspp, ARBTptspp, ASCBptspp, ATPS4rpp, CELBpts, CHTBSptspp, DHAPT, FRUpts2pp, FRUptspp, GALTptspp, GAMptspp, GLCptspp, GMPR, LDH_D, MALTptspp, MANGLYCptspp, MANptspp, MNLptspp, SBTptspp, SUCptspp, TREptspp
340	-54.8261	EX_succ_e	10.8056	-10	0.0694611	4	31.7019	-5.75177	27.0716	-3.75903	8.38941	b2415, b0104, b3736, b1380	2DGLCptspp, ACGAptspp, ACMANAptspp, ACMUMptspp, ARBTptspp, ASCBptspp, ATPS4rpp, CELBpts, CHTBSptspp, DHAPT, FRUpts2pp, FRUptspp, GALTptspp, GAMptspp, GLCptspp, GMPR, LDH_D, MALTptspp, MANGLYCptspp, MANptspp, MNLptspp, SBTptspp, SUCptspp, TREptspp
341	-54.8261	EX_succ_e	10.8056	-10	0.0694611	4	31.7019	-5.75177	27.0716	-3.75903	8.38941	b2415, b4077, b3732, b1380	2DGLCptspp, ACGAptspp, ACMANAptspp, ACMUMptspp, ARBTptspp, ASCBptspp, ASPt2pp, ATPS4rpp, CELBpts, CHTBSptspp, DHAPT, FRUpts2pp, FRUptspp, GALTptspp, GAMptspp, GLCptspp, GLUt2rpp, LDH_D, MALTptspp, MANGLYCptspp, MANptspp, MNLptspp, SBTptspp, SUCptspp, TREptspp
342	-54.8261	EX_succ_e	10.8056	-10	0.0694611	4	31.7019	-5.75177	27.0716	-3.75903	8.38941	b2415, b4077, b3736, b1380	2DGLCptspp, ACGAptspp, ACMANAptspp, ACMUMptspp, ARBTptspp, ASCBptspp, ASPt2pp, ATPS4rpp, CELBpts, CHTBSptspp, DHAPT, FRUpts2pp, FRUptspp, GALTptspp, GAMptspp, GLCptspp, GLUt2rpp, LDH_D, MALTptspp, MANGLYCptspp, MANptspp, MNLptspp, SBTptspp, SUCptspp, TREptspp
343	-54.8261	EX_succ_e	10.8056	-10	0.0694611	4	31.7019	-5.75177	27.0716	-3.75903	8.38941	b2415, b3732, b1605, b1380	2DGLCptspp, ACGAptspp, ACMANAptspp, ACMUMptspp, ARBTptspp, ARGORNt7pp, ASCBptspp, ATPS4rpp, CELBpts, CHTBSptspp, DHAPT, FRUpts2pp, FRUptspp, GALTptspp, GAMptspp, GLCptspp, LDH_D, MALTptspp, MANGLYCptspp, MANptspp, MNLptspp, SBTptspp, SUCptspp, TREptspp
344	-54.8261	EX_succ_e	10.8056	-10	0.0694611	4	31.7019	-5.75177	27.0716	-3.75903	8.38941	b2415, b3736, b1605, b1380	2DGLCptspp, ACGAptspp, ACMANAptspp, ACMUMptspp, ARBTptspp, ARGORNt7pp, ASCBptspp, ATPS4rpp, CELBpts, CHTBSptspp, DHAPT, FRUpts2pp, FRUptspp, GALTptspp, GAMptspp, GLCptspp, LDH_D, MALTptspp, MANGLYCptspp, MANptspp, MNLptspp, SBTptspp, SUCptspp, TREptspp
345	-54.8261	EX_succ_e	10.8056	-10	0.0694611	4	31.7019	-5.75177	27.0716	-3.75903	8.38941	b2415, b3736, b1325, b1380	2DGLCptspp, ACGAptspp, ACMANAptspp, ACMUMptspp, ALAGLUE, ARBTptspp, ASCBptspp, ATPS4rpp, CELBpts, CHTBSptspp, DHAPT, FRUpts2pp, FRUptspp, GALTptspp, GAMptspp, GLCptspp, LDH_D, MALTptspp, MANGLYCptspp, MANptspp, MNLptspp, SBTptspp, SUCptspp, TREptspp
346	-54.8261	EX_succ_e	10.8056	-10	0.0694611	4	31.7019	-5.75177	27.0716	-3.75903	8.38941	b2415, b3736, b1326, b1380	2DGLCptspp, ACGAptspp, ACMANAptspp, ACMUMptspp, ARBTptspp, ASCBptspp, ATPS4rpp, CELBpts, CHTBSptspp, DHAPT, FRUpts2pp, FRUptspp, GALTptspp, GAMptspp, GLCptspp, LADGMDH, LDH_D, MALTptspp, MANGLYCptspp, MANptspp, MNLptspp, SBTptspp, SUCptspp, TREptspp
347	-54.8261	EX_succ_e	10.8056	-10	0.0694611	4	31.7019	-5.75177	27.0716	-3.75903	8.38941	b2415, b0237, b3736, b1380	2DGLCptspp, ACGAptspp, ACMANAptspp, ACMUMptspp, ARBTptspp, ASCBptspp, ATPS4rpp, CELBpts, CHTBSptspp, DHAPT, FRUpts2pp, FRUptspp, GALTptspp, GAMptspp, GLCptspp, LALGP, LDH_D, MALTptspp, MANGLYCptspp, MANptspp, MNLptspp, SBTptspp, SUCptspp, TREptspp
348	-54.8261	EX_succ_e	10.8056	-10	0.0694611	4	31.7019	-5.75177	27.0716	-3.75903	8.38941	b2415, b0237, b3732, b1380	2DGLCptspp, ACGAptspp, ACMANAptspp, ACMUMptspp, ARBTptspp, ASCBptspp, ATPS4rpp, CELBpts, CHTBSptspp, DHAPT, FRUpts2pp, FRUptspp, GALTptspp, GAMptspp, GLCptspp, LALGP, LDH_D, MALTptspp, MANGLYCptspp, MANptspp, MNLptspp, SBTptspp, SUCptspp, TREptspp
349	-54.8261	EX_succ_e	10.8056	-10	0.0694611	4	31.7019	-5.75177	27.0716	-3.75903	8.38941	b2415, b3732, b1325, b1380	2DGLCptspp, ACGAptspp, ACMANAptspp, ACMUMptspp, ALAGLUE, ARBTptspp, ASCBptspp, ATPS4rpp, CELBpts, CHTBSptspp, DHAPT, FRUpts2pp, FRUptspp, GALTptspp, GAMptspp, GLCptspp, LDH_D, MALTptspp, MANGLYCptspp, MANptspp, MNLptspp, SBTptspp, SUCptspp, TREptspp
350	-54.8261	EX_succ_e	10.8056	-10	0.0694611	4	31.7019	-5.75177	27.0716	-3.75903	8.38941	b2415, b3732, b1326, b1380	2DGLCptspp, ACGAptspp, ACMANAptspp, ACMUMptspp, ARBTptspp, ASCBptspp, ATPS4rpp, CELBpts, CHTBSptspp, DHAPT, FRUpts2pp, FRUptspp, GALTptspp, GAMptspp, GLCptspp, LADGMDH, LDH_D, MALTptspp, MANGLYCptspp, MANptspp, MNLptspp, SBTptspp, SUCptspp, TREptspp
351	-54.8261	EX_succ_e	10.8056	-10	0.0694611	4	31.7019	-5.75177	27.0716	-3.75903	8.38941	b2415, b3736, b2938, b1380	2DGLCptspp, ACGAptspp, ACMANAptspp, ACMUMptspp, ARBTptspp, ARGDCpp, ASCBptspp, ATPS4rpp, CELBpts, CHTBSptspp, DHAPT, FRUpts2pp, FRUptspp, GALTptspp, GAMptspp, GLCptspp, LDH_D, MALTptspp, MANGLYCptspp, MANptspp, MNLptspp, SBTptspp, SUCptspp, TREptspp
352	-54.8261	EX_succ_e	10.8056	-10	0.0694611	4	31.7019	-5.75177	27.0716	-3.75903	8.38941	b2415, b3732, b2938, b1380	2DGLCptspp, ACGAptspp, ACMANAptspp, ACMUMptspp, ARBTptspp, ARGDCpp, ASCBptspp, ATPS4rpp, CELBpts, CHTBSptspp, DHAPT, FRUpts2pp, FRUptspp, GALTptspp, GAMptspp, GLCptspp, LDH_D, MALTptspp, MANGLYCptspp, MANptspp, MNLptspp, SBTptspp, SUCptspp, TREptspp
353	-54.8261	EX_succ_e	10.8056	-10	0.0694611	4	31.7019	-5.75177	27.0716	-3.75903	8.38941	b2415, b3736, b1380, b1285	2DGLCptspp, ACGAptspp, ACMANAptspp, ACMUMptspp, ARBTptspp, ASCBptspp, ATPS4rpp, CELBpts, CHTBSptspp, DHAPT, FRUpts2pp, FRUptspp, GALTptspp, GAMptspp, GLCptspp, LDGUNPD, LDH_D, MALTptspp, MANGLYCptspp, MANptspp, MNLptspp, SBTptspp, SUCptspp, TREptspp
354	-54.8261	EX_succ_e	10.8056	-10	0.0694611	4	31.7019	-5.75177	27.0716	-3.75903	8.38941	b2415, b3732, b1380, b1285	2DGLCptspp, ACGAptspp, ACMANAptspp, ACMUMptspp, ARBTptspp, ASCBptspp, ATPS4rpp, CELBpts, CHTBSptspp, DHAPT, FRUpts2pp, FRUptspp, GALTptspp, GAMptspp, GLCptspp, LDGUNPD, LDH_D, MALTptspp, MANGLYCptspp, MANptspp, MNLptspp, SBTptspp, SUCptspp, TREptspp
355	-54.8261	EX_succ_e	10.8056	-10	0.0694611	4	31.7019	-5.75177	27.0716	-3.75903	8.38941	b2415, b1623, b3736, b1380	2DGLCptspp, ACGAptspp, ACMANAptspp, ACMUMptspp, ADA, ARBTptspp, ASCBptspp, ATPS4rpp, CELBpts, CHTBSptspp, DADA, DHAPT, FRUpts2pp, FRUptspp, GALTptspp, GAMptspp, GLCptspp, LDH_D, MALTptspp, MANGLYCptspp, MANptspp, MNLptspp, SBTptspp, SUCptspp, TREptspp
356	-54.8261	EX_succ_e	10.8056	-10	0.0694611	4	31.7019	-5.75177	27.0716	-3.75903	8.38941	b0337, b2415, b3732, b1380	2DGLCptspp, ACGAptspp, ACMANAptspp, ACMUMptspp, ARBTptspp, ASCBptspp, ATPS4rpp, CELBpts, CHTBSptspp, CSND, DHAPT, FRUpts2pp, FRUptspp, GALTptspp, GAMptspp, GLCptspp, LDH_D, MALTptspp, MANGLYCptspp, MANptspp, MNLptspp, SBTptspp, SUCptspp, TREptspp
357	-54.8261	EX_succ_e	10.8056	-10	0.0694611	4	31.7019	-5.75177	27.0716	-3.75903	8.38941	b0337, b2415, b3736, b1380	2DGLCptspp, ACGAptspp, ACMANAptspp, ACMUMptspp, ARBTptspp, ASCBptspp, ATPS4rpp, CELBpts, CHTBSptspp, CSND, DHAPT, FRUpts2pp, FRUptspp, GALTptspp, GAMptspp, GLCptspp, LDH_D, MALTptspp, MANGLYCptspp, MANptspp, MNLptspp, SBTptspp, SUCptspp, TREptspp
358	-54.8261	EX_succ_e	10.8056	-10	0.0694611	4	31.7019	-5.75177	27.0716	-3.75903	8.38941	b0337, b2415, b3738, b1380	2DGLCptspp, ACGAptspp, ACMANAptspp, ACMUMptspp, ARBTptspp, ASCBptspp, ATPS4rpp, CELBpts, CHTBSptspp, CSND, DHAPT, FRUpts2pp, FRUptspp, GALTptspp, GAMptspp, GLCptspp, LDH_D, MALTptspp, MANGLYCptspp, MANptspp, MNLptspp, SBTptspp, SUCptspp, TREptspp
359	-54.8261	EX_succ_e	10.8056	-10	0.0694611	4	31.7019	-5.75177	27.0716	-3.75903	8.38941	b2415, b3732, b1380, b2660	2DGLCptspp, ACGAptspp, ACMANAptspp, ACMUMptspp, ARBTptspp, ASCBptspp, ATPS4rpp, CELBpts, CHTBSptspp, DHAPT, FRUpts2pp, FRUptspp, GALTptspp, GAMptspp, GLCptspp, LDH_D, MALTptspp, MANGLYCptspp, MANptspp, MNLptspp, SBTptspp, SHGO, SUCptspp, TREptspp
360	-54.8261	EX_succ_e	10.8056	-10	0.0694611	4	31.7019	-5.75177	27.0716	-3.75903	8.38941	b0902, b2415, b3732, b1380	2DGLCptspp, ACGAptspp, ACMANAptspp, ACMUMptspp, ARBTptspp, ASCBptspp, ATPS4rpp, CELBpts, CHTBSptspp, DHAPT, FRUpts2pp, FRUptspp, GALTptspp, GAMptspp, GLCptspp, LDH_D, MALTptspp, MANGLYCptspp, MANptspp, MNLptspp, OBTFL, SBTptspp, SUCptspp, TREptspp
361	-54.8261	EX_succ_e	10.8056	-10	0.0694611	4	31.7019	-5.75177	27.0716	-3.75903	8.38941	b0902, b2415, b3736, b1380	2DGLCptspp, ACGAptspp, ACMANAptspp, ACMUMptspp, ARBTptspp, ASCBptspp, ATPS4rpp, CELBpts, CHTBSptspp, DHAPT, FRUpts2pp, FRUptspp, GALTptspp, GAMptspp, GLCptspp, LDH_D, MALTptspp, MANGLYCptspp, MANptspp, MNLptspp, OBTFL, SBTptspp, SUCptspp, TREptspp
362	-54.8261	EX_succ_e	10.8056	-10	0.0694611	4	31.7019	-5.75177	27.0716	-3.75903	8.38941	b2415, b4071, b3732, b1380	2DGLCptspp, ACGAptspp, ACMANAptspp, ACMUMptspp, ARBTptspp, ASCBptspp, ATPS4rpp, CELBpts, CHTBSptspp, DHAPT, FRUpts2pp, FRUptspp, GALTptspp, GAMptspp, GLCptspp, LDH_D, MALTptspp, MANGLYCptspp, MANptspp, MNLptspp, NTRIR3pp, NTRIR4pp, SBTptspp, SUCptspp, TREptspp
363	-54.8261	EX_succ_e	10.8056	-10	0.0694611	4	31.7019	-5.75177	27.0716	-3.75903	8.38941	b2415, b4073, b3736, b1380	2DGLCptspp, ACGAptspp, ACMANAptspp, ACMUMptspp, ARBTptspp, ASCBptspp, ATPS4rpp, CELBpts, CHTBSptspp, DHAPT, FRUpts2pp, FRUptspp, GALTptspp, GAMptspp, GLCptspp, LDH_D, MALTptspp, MANGLYCptspp, MANptspp, MNLptspp, NTRIR3pp, NTRIR4pp, SBTptspp, SUCptspp, TREptspp
364	-54.8261	EX_succ_e	10.8056	-10	0.0694611	4	31.7019	-5.75177	27.0716	-3.75903	8.38941	b2415, b4071, b3736, b1380	2DGLCptspp, ACGAptspp, ACMANAptspp, ACMUMptspp, ARBTptspp, ASCBptspp, ATPS4rpp, CELBpts, CHTBSptspp, DHAPT, FRUpts2pp, FRUptspp, GALTptspp, GAMptspp, GLCptspp, LDH_D, MALTptspp, MANGLYCptspp, MANptspp, MNLptspp, NTRIR3pp, NTRIR4pp, SBTptspp, SUCptspp, TREptspp
365	-54.8261	EX_succ_e	10.8056	-10	0.0694611	4	31.7019	-5.75177	27.0716	-3.75903	8.38941	b2415, b4070, b3732, b1380	2DGLCptspp, ACGAptspp, ACMANAptspp, ACMUMptspp, ARBTptspp, ASCBptspp, ATPS4rpp, CELBpts, CHTBSptspp, DHAPT, FRUpts2pp, FRUptspp, GALTptspp, GAMptspp, GLCptspp, LDH_D, MALTptspp, MANGLYCptspp, MANptspp, MNLptspp, NTRIR3pp, NTRIR4pp, SBTptspp, SUCptspp, TREptspp
366	-54.8261	EX_succ_e	10.8056	-10	0.0694611	4	31.7019	-5.75177	27.0716	-3.75903	8.38941	b2415, b4070, b3736, b1380	2DGLCptspp, ACGAptspp, ACMANAptspp, ACMUMptspp, ARBTptspp, ASCBptspp, ATPS4rpp, CELBpts, CHTBSptspp, DHAPT, FRUpts2pp, FRUptspp, GALTptspp, GAMptspp, GLCptspp, LDH_D, MALTptspp, MANGLYCptspp, MANptspp, MNLptspp, NTRIR3pp, NTRIR4pp, SBTptspp, SUCptspp, TREptspp
367	-54.8261	EX_succ_e	10.8056	-10	0.0694611	4	31.7019	-5.75177	27.0716	-3.75903	8.38941	b2415, b4072, b3732, b1380	2DGLCptspp, ACGAptspp, ACMANAptspp, ACMUMptspp, ARBTptspp, ASCBptspp, ATPS4rpp, CELBpts, CHTBSptspp, DHAPT, FRUpts2pp, FRUptspp, GALTptspp, GAMptspp, GLCptspp, LDH_D, MALTptspp, MANGLYCptspp, MANptspp, MNLptspp, NTRIR3pp, NTRIR4pp, SBTptspp, SUCptspp, TREptspp
368	-54.8261	EX_succ_e	10.8056	-10	0.0694611	4	31.7019	-5.75177	27.0716	-3.75903	8.38941	b2415, b4072, b3736, b1380	2DGLCptspp, ACGAptspp, ACMANAptspp, ACMUMptspp, ARBTptspp, ASCBptspp, ATPS4rpp, CELBpts, CHTBSptspp, DHAPT, FRUpts2pp, FRUptspp, GALTptspp, GAMptspp, GLCptspp, LDH_D, MALTptspp, MANGLYCptspp, MANptspp, MNLptspp, NTRIR3pp, NTRIR4pp, SBTptspp, SUCptspp, TREptspp
369	-54.8261	EX_succ_e	10.8056	-10	0.0694611	4	31.7019	-5.75177	27.0716	-3.75903	8.38941	b2415, b4073, b3732, b1380	2DGLCptspp, ACGAptspp, ACMANAptspp, ACMUMptspp, ARBTptspp, ASCBptspp, ATPS4rpp, CELBpts, CHTBSptspp, DHAPT, FRUpts2pp, FRUptspp, GALTptspp, GAMptspp, GLCptspp, LDH_D, MALTptspp, MANGLYCptspp, MANptspp, MNLptspp, NTRIR3pp, NTRIR4pp, SBTptspp, SUCptspp, TREptspp
370	-54.8261	EX_succ_e	10.8056	-10	0.0694611	4	31.7019	-5.75177	27.0716	-3.75903	8.38941	b2415, b3732, b0197, b1380	2DGLCptspp, ACGAptspp, ACMANAptspp, ACMUMptspp, ARBTptspp, ASCBptspp, ATPS4rpp, CELBpts, CHTBSptspp, DHAPT, FRUpts2pp, FRUptspp, GALTptspp, GAMptspp, GLCptspp, LDH_D, MALTptspp, MANGLYCptspp, MANptspp, METDabcpp, METabcpp, MNLptspp, SBTptspp, SUCptspp, TREptspp
371	-54.8261	EX_succ_e	10.8056	-10	0.0694611	4	31.7019	-5.75177	27.0716	-3.75903	8.38941	b2415, b3736, b0197, b1380	2DGLCptspp, ACGAptspp, ACMANAptspp, ACMUMptspp, ARBTptspp, ASCBptspp, ATPS4rpp, CELBpts, CHTBSptspp, DHAPT, FRUpts2pp, FRUptspp, GALTptspp, GAMptspp, GLCptspp, LDH_D, MALTptspp, MANGLYCptspp, MANptspp, METDabcpp, METabcpp, MNLptspp, SBTptspp, SUCptspp, TREptspp
372	-54.8261	EX_succ_e	10.8056	-10	0.0694611	4	31.7019	-5.75177	27.0716	-3.75903	8.38941	b2415, b3732, b0199, b1380	2DGLCptspp, ACGAptspp, ACMANAptspp, ACMUMptspp, ARBTptspp, ASCBptspp, ATPS4rpp, CELBpts, CHTBSptspp, DHAPT, FRUpts2pp, FRUptspp, GALTptspp, GAMptspp, GLCptspp, LDH_D, MALTptspp, MANGLYCptspp, MANptspp, METDabcpp, METabcpp, MNLptspp, SBTptspp, SUCptspp, TREptspp
373	-54.8261	EX_succ_e	10.8056	-10	0.0694611	4	31.7019	-5.75177	27.0716	-3.75903	8.38941	b2415, b3736, b0199, b1380	2DGLCptspp, ACGAptspp, ACMANAptspp, ACMUMptspp, ARBTptspp, ASCBptspp, ATPS4rpp, CELBpts, CHTBSptspp, DHAPT, FRUpts2pp, FRUptspp, GALTptspp, GAMptspp, GLCptspp, LDH_D, MALTptspp, MANGLYCptspp, MANptspp, METDabcpp, METabcpp, MNLptspp, SBTptspp, SUCptspp, TREptspp
374	-54.8261	EX_succ_e	10.8056	-10	0.0694611	4	31.7019	-5.75177	27.0716	-3.75903	8.38941	b2415, b3736, b0198, b1380	2DGLCptspp, ACGAptspp, ACMANAptspp, ACMUMptspp, ARBTptspp, ASCBptspp, ATPS4rpp, CELBpts, CHTBSptspp, DHAPT, FRUpts2pp, FRUptspp, GALTptspp, GAMptspp, GLCptspp, LDH_D, MALTptspp, MANGLYCptspp, MANptspp, METDabcpp, METabcpp, MNLptspp, SBTptspp, SUCptspp, TREptspp
375	-54.8261	EX_succ_e	10.8056	-10	0.0694611	4	31.7019	-5.75177	27.0716	-3.75903	8.38941	b0160, b2415, b3732, b1380	2DGLCptspp, ACGAptspp, ACMANAptspp, ACMUMptspp, ARBTptspp, ASCBptspp, ATPS4rpp, CELBpts, CHTBSptspp, DHAPT, FRUpts2pp, FRUptspp, GALTptspp, GAMptspp, GLCptspp, LDH_D, MALTptspp, MANGLYCptspp, MANptspp, MNLptspp, NTPTP1, NTPTP2, SBTptspp, SUCptspp, TREptspp
376	-54.8261	EX_succ_e	10.8056	-10	0.0694611	4	31.7019	-5.75177	27.0716	-3.75903	8.38941	b0160, b2415, b3736, b1380	2DGLCptspp, ACGAptspp, ACMANAptspp, ACMUMptspp, ARBTptspp, ASCBptspp, ATPS4rpp, CELBpts, CHTBSptspp, DHAPT, FRUpts2pp, FRUptspp, GALTptspp, GAMptspp, GLCptspp, LDH_D, MALTptspp, MANGLYCptspp, MANptspp, MNLptspp, NTPTP1, NTPTP2, SBTptspp, SUCptspp, TREptspp
377	-54.8261	EX_succ_e	10.8056	-10	0.0694611	4	31.7019	-5.75177	27.0716	-3.75903	8.38941	b0036, b2415, b3732, b1380	2DGLCptspp, ACGAptspp, ACMANAptspp, ACMUMptspp, ARBTptspp, ASCBptspp, ATPS4rpp, CELBpts, CHTBSptspp, CRNCAR, CRNCDH, DHAPT, FRUpts2pp, FRUptspp, GALTptspp, GAMptspp, GLCptspp, LDH_D, MALTptspp, MANGLYCptspp, MANptspp, MNLptspp, SBTptspp, SUCptspp, TREptspp
378	-54.8261	EX_succ_e	10.8056	-10	0.0694611	4	31.7019	-5.75177	27.0716	-3.75903	8.38941	b0036, b2415, b3736, b1380	2DGLCptspp, ACGAptspp, ACMANAptspp, ACMUMptspp, ARBTptspp, ASCBptspp, ATPS4rpp, CELBpts, CHTBSptspp, CRNCAR, CRNCDH, DHAPT, FRUpts2pp, FRUptspp, GALTptspp, GAMptspp, GLCptspp, LDH_D, MALTptspp, MANGLYCptspp, MANptspp, MNLptspp, SBTptspp, SUCptspp, TREptspp
379	-54.8261	EX_succ_e	10.8056	-10	0.0694611	4	31.7019	-5.75177	27.0716	-3.75903	8.38941	b2937, b2415, b3736, b1380	2DGLCptspp, ACGAptspp, ACMANAptspp, ACMUMptspp, AGMT, ARBTptspp, ASCBptspp, ATPS4rpp, CELBpts, CHTBSptspp, DHAPT, FRUpts2pp, FRUptspp, GALTptspp, GAMptspp, GLCptspp, LDH_D, MALTptspp, MANGLYCptspp, MANptspp, MNLptspp, SBTptspp, SUCptspp, TREptspp
380	-54.8261	EX_succ_e	10.8056	-10	0.0694611	4	31.7019	-5.75177	27.0716	-3.75903	8.38941	b2937, b2415, b3732, b1380	2DGLCptspp, ACGAptspp, ACMANAptspp, ACMUMptspp, AGMT, ARBTptspp, ASCBptspp, ATPS4rpp, CELBpts, CHTBSptspp, DHAPT, FRUpts2pp, FRUptspp, GALTptspp, GAMptspp, GLCptspp, LDH_D, MALTptspp, MANGLYCptspp, MANptspp, MNLptspp, SBTptspp, SUCptspp, TREptspp
381	-54.8261	EX_succ_e	10.8056	-10	0.0694611	4	31.7019	-5.75177	27.0716	-3.75903	8.38941	b2415, b3528, b3732, b1380	2DGLCptspp, ACGAptspp, ACMANAptspp, ACMUMptspp, ARBTptspp, ASCBptspp, ASPt2_2pp, ATPS4rpp, CELBpts, CHTBSptspp, DHAPT, FRUpts2pp, FRUptspp, FUMt2_2pp, GALTptspp, GAMptspp, GLCptspp, LDH_D, MALDt2_2pp, MALTptspp, MALt2_2pp, MANGLYCptspp, MANptspp, MNLptspp, OROTt2_2pp, SBTptspp, SUCptspp, TREptspp
382	-54.8261	EX_succ_e	10.8056	-10	0.0694611	4	31.7019	-5.75177	27.0716	-3.75903	8.38941	b2415, b3528, b3736, b1380	2DGLCptspp, ACGAptspp, ACMANAptspp, ACMUMptspp, ARBTptspp, ASCBptspp, ASPt2_2pp, ATPS4rpp, CELBpts, CHTBSptspp, DHAPT, FRUpts2pp, FRUptspp, FUMt2_2pp, GALTptspp, GAMptspp, GLCptspp, LDH_D, MALDt2_2pp, MALTptspp, MALt2_2pp, MANGLYCptspp, MANptspp, MNLptspp, OROTt2_2pp, SBTptspp, SUCptspp, TREptspp
383	-54.8261	EX_succ_e	10.8056	-10	0.0694611	4	31.7019	-5.75177	27.0716	-3.75903	8.38941	b2415, b3736, b1380, b4167	2DGLCptspp, ACGAptspp, ACMANAptspp, ACMUMptspp, ARBTptspp, ASCBptspp, ATPS4rpp, CELBpts, CHTBSptspp, DHAPT, FRUpts2pp, FRUptspp, GALTptspp, GAMptspp, GLCptspp, LDH_D, MALTptspp, MANGLYCptspp, MANptspp, MNLptspp, NADHXD, NADHXE, NADPHXD, NADPHXE, SBTptspp, SUCptspp, TREptspp
384	-54.8261	EX_succ_e	10.8056	-10	0.0694611	4	31.7019	-5.75177	27.0716	-3.75903	8.38941	b2415, b3732, b1380, b4167	2DGLCptspp, ACGAptspp, ACMANAptspp, ACMUMptspp, ARBTptspp, ASCBptspp, ATPS4rpp, CELBpts, CHTBSptspp, DHAPT, FRUpts2pp, FRUptspp, GALTptspp, GAMptspp, GLCptspp, LDH_D, MALTptspp, MANGLYCptspp, MANptspp, MNLptspp, NADHXD, NADHXE, NADPHXD, NADPHXE, SBTptspp, SUCptspp, TREptspp
385	-54.8261	EX_succ_e	10.8056	-10	0.0694611	4	31.7019	-5.75177	27.0716	-3.75903	8.38941	b3926, b2415, b3732, b1380	2DGLCptspp, ACGAptspp, ACMANAptspp, ACMUMptspp, ARBTptspp, ASCBptspp, ATPS4rpp, CELBpts, CHTBSptspp, DHAPT, FRUpts2pp, FRUptspp, GALTptspp, GAMptspp, GLCptspp, GLYK, LDH_D, MALTptspp, MANGLYCptspp, MANptspp, MNLptspp, SBTptspp, SUCptspp, TREptspp
386	-54.8261	EX_succ_e	10.8056	-10	0.0694611	4	31.7019	-5.75177	27.0716	-3.75903	8.38941	b3926, b2415, b3736, b1380	2DGLCptspp, ACGAptspp, ACMANAptspp, ACMUMptspp, ARBTptspp, ASCBptspp, ATPS4rpp, CELBpts, CHTBSptspp, DHAPT, FRUpts2pp, FRUptspp, GALTptspp, GAMptspp, GLCptspp, GLYK, LDH_D, MALTptspp, MANGLYCptspp, MANptspp, MNLptspp, SBTptspp, SUCptspp, TREptspp
387	-54.8261	EX_succ_e	10.8056	-10	0.0694611	4	31.7019	-5.75177	27.0716	-3.75903	8.38941	b2388, b2415, b3732, b1380	2DGLCptspp, ACGAptspp, ACMANAptspp, ACMUMptspp, ARBTptspp, ASCBptspp, ATPS4rpp, CELBpts, CHTBSptspp, DHAPT, FRUpts2pp, FRUptspp, GALTptspp, GAMptspp, GLCptspp, HEX1, LDH_D, MALTptspp, MANGLYCptspp, MANptspp, MNLptspp, SBTptspp, SUCptspp, TREptspp
388	-54.8261	EX_succ_e	10.8056	-10	0.0694611	4	31.7019	-5.75177	27.0716	-3.75903	8.38941	b2388, b2415, b3736, b1380	2DGLCptspp, ACGAptspp, ACMANAptspp, ACMUMptspp, ARBTptspp, ASCBptspp, ATPS4rpp, CELBpts, CHTBSptspp, DHAPT, FRUpts2pp, FRUptspp, GALTptspp, GAMptspp, GLCptspp, HEX1, LDH_D, MALTptspp, MANGLYCptspp, MANptspp, MNLptspp, SBTptspp, SUCptspp, TREptspp
389	-54.8261	EX_succ_e	10.8056	-10	0.0694611	4	31.7019	-5.75177	27.0716	-3.75903	8.38941	b2415, b3736, b3028, b1380	2DGLCptspp, ACGAptspp, ACMANAptspp, ACMUMptspp, ARBTptspp, ASCBptspp, ATPS4rpp, CELBpts, CHTBSptspp, DHAPT, FRUpts2pp, FRUptspp, GALTptspp, GAMptspp, GLCptspp, LDH_D, MALTptspp, MANGLYCptspp, MANptspp, MNLptspp, NADPHQR2, NADPHQR3, NADPHQR4, SBTptspp, SUCptspp, TREptspp
390	-54.8261	EX_succ_e	10.8056	-10	0.0694611	4	31.7019	-5.75177	27.0716	-3.75903	8.38941	b2415, b3732, b0591, b1380	2DGLCptspp, ACGAptspp, ACMANAptspp, ACMUMptspp, ARBTptspp, ASCBptspp, ATPS4rpp, CELBpts, CHTBSptspp, DHAPT, FEENTERtpp, FRUpts2pp, FRUptspp, GALTptspp, GAMptspp, GLCptspp, LDH_D, MALTptspp, MANGLYCptspp, MANptspp, MNLptspp, SBTptspp, SUCptspp, TREptspp
391	-54.8261	EX_succ_e	10.8056	-10	0.0694611	4	31.7019	-5.75177	27.0716	-3.75903	8.38941	b2415, b3736, b0591, b1380	2DGLCptspp, ACGAptspp, ACMANAptspp, ACMUMptspp, ARBTptspp, ASCBptspp, ATPS4rpp, CELBpts, CHTBSptspp, DHAPT, FEENTERtpp, FRUpts2pp, FRUptspp, GALTptspp, GAMptspp, GLCptspp, LDH_D, MALTptspp, MANGLYCptspp, MANptspp, MNLptspp, SBTptspp, SUCptspp, TREptspp
392	-54.8261	EX_succ_e	10.8056	-10	0.0694611	4	31.7019	-5.75177	27.0716	-3.75903	8.38941	b0945, b2415, b3736, b1380	2DGLCptspp, ACGAptspp, ACMANAptspp, ACMUMptspp, ARBTptspp, ASCBptspp, ATPS4rpp, CELBpts, CHTBSptspp, DHAPT, DHORD2, DHORD5, FRUpts2pp, FRUptspp, GALTptspp, GAMptspp, GLCptspp, LDH_D, MALTptspp, MANGLYCptspp, MANptspp, MNLptspp, SBTptspp, SUCptspp, TREptspp
393	-54.8261	EX_succ_e	10.8056	-10	0.0694611	4	31.7019	-5.75177	27.0716	-3.75903	8.38941	b0945, b2415, b3732, b1380	2DGLCptspp, ACGAptspp, ACMANAptspp, ACMUMptspp, ARBTptspp, ASCBptspp, ATPS4rpp, CELBpts, CHTBSptspp, DHAPT, DHORD2, DHORD5, FRUpts2pp, FRUptspp, GALTptspp, GAMptspp, GLCptspp, LDH_D, MALTptspp, MANGLYCptspp, MANptspp, MNLptspp, SBTptspp, SUCptspp, TREptspp
394	-54.8261	EX_succ_e	10.8056	-10	0.0694611	4	31.7019	-5.75177	27.0716	-3.75903	8.38941	b2415, b4267, b3732, b1380	2DGLCptspp, ACGAptspp, ACMANAptspp, ACMUMptspp, ARBTptspp, ASCBptspp, ATPS4rpp, CELBpts, CHTBSptspp, DHAPT, FRUpts2pp, FRUptspp, GALTptspp, GAMptspp, GLCptspp, IDOND, IDOND2, LDH_D, MALTptspp, MANGLYCptspp, MANptspp, MNLptspp, SBTptspp, SUCptspp, TREptspp
395	-54.8261	EX_succ_e	10.8056	-10	0.0694611	4	31.7019	-5.75177	27.0716	-3.75903	8.38941	b2415, b4267, b3736, b1380	2DGLCptspp, ACGAptspp, ACMANAptspp, ACMUMptspp, ARBTptspp, ASCBptspp, ATPS4rpp, CELBpts, CHTBSptspp, DHAPT, FRUpts2pp, FRUptspp, GALTptspp, GAMptspp, GLCptspp, IDOND, IDOND2, LDH_D, MALTptspp, MANGLYCptspp, MANptspp, MNLptspp, SBTptspp, SUCptspp, TREptspp
396	-54.8261	EX_succ_e	10.8056	-10	0.0694611	4	31.7019	-5.75177	27.0716	-3.75903	8.38941	b2415, b2700, b3732, b1380	2DGLCptspp, ACGAptspp, ACMANAptspp, ACMUMptspp, ARBTptspp, ASCBptspp, ATPS4rpp, CELBpts, CHTBSptspp, DHAPT, FRUpts2pp, FRUptspp, GALTptspp, GAMptspp, GLCptspp, LDH_D, MALTptspp, MANGLYCptspp, MANptspp, MNLptspp, NMNDA, SBTptspp, SUCptspp, TREptspp
397	-54.8261	EX_succ_e	10.8056	-10	0.0694611	4	31.7019	-5.75177	27.0716	-3.75903	8.38941	b2415, b2700, b3736, b1380	2DGLCptspp, ACGAptspp, ACMANAptspp, ACMUMptspp, ARBTptspp, ASCBptspp, ATPS4rpp, CELBpts, CHTBSptspp, DHAPT, FRUpts2pp, FRUptspp, GALTptspp, GAMptspp, GLCptspp, LDH_D, MALTptspp, MANGLYCptspp, MANptspp, MNLptspp, NMNDA, SBTptspp, SUCptspp, TREptspp
398	-54.8261	EX_succ_e	10.8056	-10	0.0694611	4	31.7019	-5.75177	27.0716	-3.75903	8.38941	b3831, b2415, b3732, b1380	2DGLCptspp, ACGAptspp, ACMANAptspp, ACMUMptspp, ARBTptspp, ASCBptspp, ATPS4rpp, CELBpts, CHTBSptspp, DHAPT, FRUpts2pp, FRUptspp, GALTptspp, GAMptspp, GLCptspp, LDH_D, MALTptspp, MANGLYCptspp, MANptspp, MNLptspp, PYNP2r, SBTptspp, SUCptspp, TREptspp
399	-54.8261	EX_succ_e	10.8056	-10	0.0694611	4	31.7019	-5.75177	27.0716	-3.75903	8.38941	b3831, b2415, b3736, b1380	2DGLCptspp, ACGAptspp, ACMANAptspp, ACMUMptspp, ARBTptspp, ASCBptspp, ATPS4rpp, CELBpts, CHTBSptspp, DHAPT, FRUpts2pp, FRUptspp, GALTptspp, GAMptspp, GLCptspp, LDH_D, MALTptspp, MANGLYCptspp, MANptspp, MNLptspp, PYNP2r, SBTptspp, SUCptspp, TREptspp
400	-54.8261	EX_succ_e	10.8056	-10	0.0694611	4	31.7019	-5.75177	27.0716	-3.75903	8.38941	b4382, b2415, b3732, b1380	2DGLCptspp, ACGAptspp, ACMANAptspp, ACMUMptspp, ARBTptspp, ASCBptspp, ATPS4rpp, CELBpts, CHTBSptspp, DHAPT, FRUpts2pp, FRUptspp, GALTptspp, GAMptspp, GLCptspp, LDH_D, MALTptspp, MANGLYCptspp, MANptspp, MNLptspp, SBTptspp, SUCptspp, TMDPP, TREptspp
401	-54.8261	EX_succ_e	10.8056	-10	0.0694611	4	31.7019	-5.75177	27.0716	-3.75903	8.38941	b4382, b2415, b3736, b1380	2DGLCptspp, ACGAptspp, ACMANAptspp, ACMUMptspp, ARBTptspp, ASCBptspp, ATPS4rpp, CELBpts, CHTBSptspp, DHAPT, FRUpts2pp, FRUptspp, GALTptspp, GAMptspp, GLCptspp, LDH_D, MALTptspp, MANGLYCptspp, MANptspp, MNLptspp, SBTptspp, SUCptspp, TMDPP, TREptspp
402	-54.8261	EX_succ_e	10.8056	-10	0.0694611	4	31.7019	-5.75177	27.0716	-3.75903	8.38941	b3786, b2415, b3732, b1380	2DGLCptspp, ACGAptspp, ACMANAptspp, ACMUMptspp, ARBTptspp, ASCBptspp, ATPS4rpp, CELBpts, CHTBSptspp, DHAPT, FRUpts2pp, FRUptspp, GALTptspp, GAMptspp, GLCptspp, LDH_D, MALTptspp, MANGLYCptspp, MANptspp, MNLptspp, SBTptspp, SUCptspp, TREptspp, UAG2E
403	-54.8261	EX_succ_e	10.8056	-10	0.0694611	4	31.7019	-5.75177	27.0716	-3.75903	8.38941	b2038, b2415, b3736, b1380	2DGLCptspp, ACGAptspp, ACMANAptspp, ACMUMptspp, ARBTptspp, ASCBptspp, ATPS4rpp, CELBpts, CHTBSptspp, DHAPT, FRUpts2pp, FRUptspp, GALTptspp, GAMptspp, GLCptspp, LDH_D, MALTptspp, MANGLYCptspp, MANptspp, MNLptspp, SBTptspp, SUCptspp, TDPDRE, TREptspp
404	-54.8261	EX_succ_e	10.8056	-10	0.0694611	4	31.7019	-5.75177	27.0716	-3.75903	8.38941	b3052, b2415, b3732, b1380	2DGLCptspp, ACGAptspp, ACMANAptspp, ACMUMptspp, ARBTptspp, ASCBptspp, ATPS4rpp, CELBpts, CHTBSptspp, DHAPT, FRUpts2pp, FRUptspp, GALTptspp, GAMptspp, GLCptspp, GMHEPAT, GMHEPK, LDH_D, MALTptspp, MANGLYCptspp, MANptspp, MNLptspp, SBTptspp, SUCptspp, TREptspp
405	-54.8261	EX_succ_e	10.8056	-10	0.0694611	4	31.7019	-5.75177	27.0716	-3.75903	8.38941	b2415, b3736, b3621, b1380	2DGLCptspp, ACGAptspp, ACMANAptspp, ACMUMptspp, ARBTptspp, ASCBptspp, ATPS4rpp, CELBpts, CHTBSptspp, DHAPT, FRUpts2pp, FRUptspp, GALTptspp, GAMptspp, GLCptspp, HEPT1, LDH_D, MALTptspp, MANGLYCptspp, MANptspp, MNLptspp, SBTptspp, SUCptspp, TREptspp
406	-54.8261	EX_succ_e	10.8056	-10	0.0694611	4	31.7019	-5.75177	27.0716	-3.75903	8.38941	b2415, b3787, b3732, b1380	2DGLCptspp, ACGAptspp, ACMANAptspp, ACMUMptspp, ARBTptspp, ASCBptspp, ATPS4rpp, CELBpts, CHTBSptspp, DHAPT, FRUpts2pp, FRUptspp, GALTptspp, GAMptspp, GLCptspp, LDH_D, MALTptspp, MANGLYCptspp, MANptspp, MNLptspp, SBTptspp, SUCptspp, TREptspp, UACMAMO
407	-54.8261	EX_succ_e	10.8056	-10	0.0694611	4	31.7019	-5.75177	27.0716	-3.75903	8.38941	b4481, b2415, b3736, b1380	2DGLCptspp, AADDGT, ACGAptspp, ACMANAptspp, ACMUMptspp, ARBTptspp, ASCBptspp, ATPS4rpp, CELBpts, CHTBSptspp, DHAPT, FRUpts2pp, FRUptspp, GALTptspp, GAMptspp, GLCptspp, LDH_D, MALTptspp, MANGLYCptspp, MANptspp, MNLptspp, SBTptspp, SUCptspp, TREptspp
408	-54.8261	EX_succ_e	10.8056	-10	0.0694611	4	31.7019	-5.75177	27.0716	-3.75903	8.38941	b2415, b3732, b3785, b1380	2DGLCptspp, ACGAptspp, ACMANAptspp, ACMUMptspp, ARBTptspp, ASCBptspp, ATPS4rpp, CELBpts, CHTBSptspp, DHAPT, ECAP1pp, ECAP2pp, ECAP3pp, FRUpts2pp, FRUptspp, GALTptspp, GAMptspp, GLCptspp, LDH_D, MALTptspp, MANGLYCptspp, MANptspp, MNLptspp, SBTptspp, SUCptspp, TREptspp
409	-54.8261	EX_succ_e	10.8056	-10	0.0694611	4	31.7019	-5.75177	27.0716	-3.75903	8.38941	b2415, b3732, b3622, b1380	2DGLCptspp, ACGAptspp, ACMANAptspp, ACMUMptspp, ARBTptspp, ASCBptspp, ATPS4rpp, CELBpts, CHTBSptspp, DHAPT, ECA4OALpp, FRUpts2pp, FRUptspp, GALTptspp, GAMptspp, GLCptspp, LDH_D, MALTptspp, MANGLYCptspp, MANptspp, MNLptspp, O16A4Lpp, SBTptspp, SUCptspp, TREptspp
410	-54.8261	EX_succ_e	10.8056	-10	0.0694611	4	31.7019	-5.75177	27.0716	-3.75903	8.38941	b2415, b3790, b3732, b1380	2DGLCptspp, ACGAptspp, ACMANAptspp, ACMUMptspp, ARBTptspp, ASCBptspp, ATPS4rpp, CELBpts, CHTBSptspp, DHAPT, FRUpts2pp, FRUptspp, GALTptspp, GAMptspp, GLCptspp, LDH_D, MALTptspp, MANGLYCptspp, MANptspp, MNLptspp, SBTptspp, SUCptspp, TDPADGAT, TREptspp
411	-54.8261	EX_succ_e	10.8056	-10	0.0694611	4	31.7019	-5.75177	27.0716	-3.75903	8.38941	b2415, b3738, b3626, b1380	2DGLCptspp, ACGAptspp, ACMANAptspp, ACMUMptspp, ARBTptspp, ASCBptspp, ATPS4rpp, CELBpts, CHTBSptspp, DHAPT, FRUpts2pp, FRUptspp, GALTptspp, GAMptspp, GLCTR3, GLCptspp, LDH_D, MALTptspp, MANGLYCptspp, MANptspp, MNLptspp, SBTptspp, SUCptspp, TREptspp
412	-54.8261	EX_succ_e	10.8056	-10	0.0694611	4	31.7019	-5.75177	27.0716	-3.75903	8.38941	b2415, b3732, b3628, b1380	2DGLCptspp, ACGAptspp, ACMANAptspp, ACMUMptspp, ARBTptspp, ASCBptspp, ATPS4rpp, CELBpts, CHTBSptspp, DHAPT, FRUpts2pp, FRUptspp, GALT1, GALTptspp, GAMptspp, GLCptspp, LDH_D, MALTptspp, MANGLYCptspp, MANptspp, MNLptspp, SBTptspp, SUCptspp, TREptspp
413	-54.8261	EX_succ_e	10.8056	-10	0.0694611	4	31.7019	-5.75177	27.0716	-3.75903	8.38941	b2415, b3736, b3624, b1380	2DGLCptspp, ACGAptspp, ACMANAptspp, ACMUMptspp, ARBTptspp, ASCBptspp, ATPS4rpp, CELBpts, CHTBSptspp, DHAPT, FRUpts2pp, FRUptspp, GALTptspp, GAMptspp, GLCptspp, LDH_D, MALTptspp, MANGLYCptspp, MANptspp, MNLptspp, MOAT3C, SBTptspp, SUCptspp, TREptspp
414	-54.8261	EX_succ_e	10.8056	-10	0.0694611	4	31.7019	-5.75177	27.0716	-3.75903	8.38941	b3794, b2415, b3732, b1380	2DGLCptspp, ACGAptspp, ACMAMUT, ACMANAptspp, ACMUMptspp, ARBTptspp, ASCBptspp, ATPS4rpp, CELBpts, CHTBSptspp, DHAPT, FRUpts2pp, FRUptspp, GALTptspp, GAMptspp, GLCptspp, LDH_D, MALTptspp, MANGLYCptspp, MANptspp, MNLptspp, SBTptspp, SUCptspp, TREptspp
415	-54.8261	EX_succ_e	10.8056	-10	0.0694611	4	31.7019	-5.75177	27.0716	-3.75903	8.38941	b3786, b2415, b3736, b1380	2DGLCptspp, ACGAptspp, ACMANAptspp, ACMUMptspp, ARBTptspp, ASCBptspp, ATPS4rpp, CELBpts, CHTBSptspp, DHAPT, FRUpts2pp, FRUptspp, GALTptspp, GAMptspp, GLCptspp, LDH_D, MALTptspp, MANGLYCptspp, MANptspp, MNLptspp, SBTptspp, SUCptspp, TREptspp, UAG2E
416	-54.8261	EX_succ_e	10.8056	-10	0.0694611	4	31.7019	-5.75177	27.0716	-3.75903	8.38941	b3052, b2415, b3736, b1380	2DGLCptspp, ACGAptspp, ACMANAptspp, ACMUMptspp, ARBTptspp, ASCBptspp, ATPS4rpp, CELBpts, CHTBSptspp, DHAPT, FRUpts2pp, FRUptspp, GALTptspp, GAMptspp, GLCptspp, GMHEPAT, GMHEPK, LDH_D, MALTptspp, MANGLYCptspp, MANptspp, MNLptspp, SBTptspp, SUCptspp, TREptspp
417	-54.8261	EX_succ_e	10.8056	-10	0.0694611	4	31.7019	-5.75177	27.0716	-3.75903	8.38941	b2415, b3787, b3736, b1380	2DGLCptspp, ACGAptspp, ACMANAptspp, ACMUMptspp, ARBTptspp, ASCBptspp, ATPS4rpp, CELBpts, CHTBSptspp, DHAPT, FRUpts2pp, FRUptspp, GALTptspp, GAMptspp, GLCptspp, LDH_D, MALTptspp, MANGLYCptspp, MANptspp, MNLptspp, SBTptspp, SUCptspp, TREptspp, UACMAMO
418	-54.8261	EX_succ_e	10.8056	-10	0.0694611	4	31.7019	-5.75177	27.0716	-3.75903	8.38941	b2415, b3736, b3785, b1380	2DGLCptspp, ACGAptspp, ACMANAptspp, ACMUMptspp, ARBTptspp, ASCBptspp, ATPS4rpp, CELBpts, CHTBSptspp, DHAPT, ECAP1pp, ECAP2pp, ECAP3pp, FRUpts2pp, FRUptspp, GALTptspp, GAMptspp, GLCptspp, LDH_D, MALTptspp, MANGLYCptspp, MANptspp, MNLptspp, SBTptspp, SUCptspp, TREptspp
419	-54.8261	EX_succ_e	10.8056	-10	0.0694611	4	31.7019	-5.75177	27.0716	-3.75903	8.38941	b2415, b3736, b3622, b1380	2DGLCptspp, ACGAptspp, ACMANAptspp, ACMUMptspp, ARBTptspp, ASCBptspp, ATPS4rpp, CELBpts, CHTBSptspp, DHAPT, ECA4OALpp, FRUpts2pp, FRUptspp, GALTptspp, GAMptspp, GLCptspp, LDH_D, MALTptspp, MANGLYCptspp, MANptspp, MNLptspp, O16A4Lpp, SBTptspp, SUCptspp, TREptspp
420	-54.8261	EX_succ_e	10.8056	-10	0.0694611	4	31.7019	-5.75177	27.0716	-3.75903	8.38941	b2415, b3790, b3736, b1380	2DGLCptspp, ACGAptspp, ACMANAptspp, ACMUMptspp, ARBTptspp, ASCBptspp, ATPS4rpp, CELBpts, CHTBSptspp, DHAPT, FRUpts2pp, FRUptspp, GALTptspp, GAMptspp, GLCptspp, LDH_D, MALTptspp, MANGLYCptspp, MANptspp, MNLptspp, SBTptspp, SUCptspp, TDPADGAT, TREptspp
421	-54.8261	EX_succ_e	10.8056	-10	0.0694611	4	31.7019	-5.75177	27.0716	-3.75903	8.38941	b2040, b2415, b3732, b1380	2DGLCptspp, ACGAptspp, ACMANAptspp, ACMUMptspp, ARBTptspp, ASCBptspp, ATPS4rpp, CELBpts, CHTBSptspp, DHAPT, FRUpts2pp, FRUptspp, GALTptspp, GAMptspp, GLCptspp, LDH_D, MALTptspp, MANGLYCptspp, MANptspp, MNLptspp, SBTptspp, SUCptspp, TDPDRR, TREptspp
422	-54.8261	EX_succ_e	10.8056	-10	0.0694611	4	31.7019	-5.75177	27.0716	-3.75903	8.38941	b2415, b3736, b3628, b1380	2DGLCptspp, ACGAptspp, ACMANAptspp, ACMUMptspp, ARBTptspp, ASCBptspp, ATPS4rpp, CELBpts, CHTBSptspp, DHAPT, FRUpts2pp, FRUptspp, GALT1, GALTptspp, GAMptspp, GLCptspp, LDH_D, MALTptspp, MANGLYCptspp, MANptspp, MNLptspp, SBTptspp, SUCptspp, TREptspp
423	-54.8261	EX_succ_e	10.8056	-10	0.0694611	4	31.7019	-5.75177	27.0716	-3.75903	8.38941	b3794, b2415, b3736, b1380	2DGLCptspp, ACGAptspp, ACMAMUT, ACMANAptspp, ACMUMptspp, ARBTptspp, ASCBptspp, ATPS4rpp, CELBpts, CHTBSptspp, DHAPT, FRUpts2pp, FRUptspp, GALTptspp, GAMptspp, GLCptspp, LDH_D, MALTptspp, MANGLYCptspp, MANptspp, MNLptspp, SBTptspp, SUCptspp, TREptspp
424	-54.8261	EX_succ_e	10.8056	-10	0.0694611	4	31.7019	-5.75177	27.0716	-3.75903	8.38941	b2415, b3732, b3629, b1380	2DGLCptspp, ACGAptspp, ACMANAptspp, ACMUMptspp, ARBTptspp, ASCBptspp, ATPS4rpp, CELBpts, CHTBSptspp, DHAPT, FRUpts2pp, FRUptspp, GALTptspp, GAMptspp, GLCptspp, LDH_D, MALTptspp, MANGLYCptspp, MANptspp, MNLptspp, RHAT1, SBTptspp, SUCptspp, TREptspp
425	-54.8261	EX_succ_e	10.8056	-10	0.0694611	4	31.7019	-5.75177	27.0716	-3.75903	8.38941	b2415, b3732, b1380, b3792	2DGLCptspp, ACGAptspp, ACMANAptspp, ACMUMptspp, ARBTptspp, ASCBptspp, ATPS4rpp, CELBpts, CHTBSptspp, DHAPT, ECAtpp, FRUpts2pp, FRUptspp, GALTptspp, GAMptspp, GLCptspp, LDH_D, MALTptspp, MANGLYCptspp, MANptspp, MNLptspp, SBTptspp, SUCptspp, TREptspp
426	-54.8261	EX_succ_e	10.8056	-10	0.0694611	4	31.7019	-5.75177	27.0716	-3.75903	8.38941	b0222, b2415, b3732, b1380	2DGLCptspp, ACGAptspp, ACMANAptspp, ACMUMptspp, ARBTptspp, ASCBptspp, ATPS4rpp, CELBpts, CHTBSptspp, DHAPT, FRUpts2pp, FRUptspp, GALTptspp, GAMptspp, GLCptspp, LDH_D, MALTptspp, MANGLYCptspp, MANptspp, MNLptspp, S7PI, SBTptspp, SUCptspp, TREptspp
427	-54.8261	EX_succ_e	10.8056	-10	0.0694611	4	31.7019	-5.75177	27.0716	-3.75903	8.38941	b2040, b2415, b3736, b1380	2DGLCptspp, ACGAptspp, ACMANAptspp, ACMUMptspp, ARBTptspp, ASCBptspp, ATPS4rpp, CELBpts, CHTBSptspp, DHAPT, FRUpts2pp, FRUptspp, GALTptspp, GAMptspp, GLCptspp, LDH_D, MALTptspp, MANGLYCptspp, MANptspp, MNLptspp, SBTptspp, SUCptspp, TDPDRR, TREptspp
428	-54.8261	EX_succ_e	10.8056	-10	0.0694611	4	31.7019	-5.75177	27.0716	-3.75903	8.38941	b0200, b2415, b3732, b1380	2DGLCptspp, ACGAptspp, ACMANAptspp, ACMUMptspp, ARBTptspp, ASCBptspp, ATPS4rpp, CELBpts, CHTBSptspp, DHAPT, FRUpts2pp, FRUptspp, GALTptspp, GAMptspp, GLCptspp, GMHEPPA, LDH_D, MALTptspp, MANGLYCptspp, MANptspp, MNLptspp, SBTptspp, SUCptspp, TREptspp
429	-54.8261	EX_succ_e	10.8056	-10	0.0694611	4	31.7019	-5.75177	27.0716	-3.75903	8.38941	b2415, b3736, b3629, b1380	2DGLCptspp, ACGAptspp, ACMANAptspp, ACMUMptspp, ARBTptspp, ASCBptspp, ATPS4rpp, CELBpts, CHTBSptspp, DHAPT, FRUpts2pp, FRUptspp, GALTptspp, GAMptspp, GLCptspp, LDH_D, MALTptspp, MANGLYCptspp, MANptspp, MNLptspp, RHAT1, SBTptspp, SUCptspp, TREptspp
430	-54.8261	EX_succ_e	10.8056	-10	0.0694611	4	31.7019	-5.75177	27.0716	-3.75903	8.38941	b2415, b3732, b3627, b1380	2DGLCptspp, ACGAptspp, ACMANAptspp, ACMUMptspp, ARBTptspp, ASCBptspp, ATPS4rpp, CELBpts, CHTBSptspp, DHAPT, FRUpts2pp, FRUptspp, GALTptspp, GAMptspp, GLCTR2, GLCptspp, LDH_D, MALTptspp, MANGLYCptspp, MANptspp, MNLptspp, SBTptspp, SUCptspp, TREptspp
431	-54.8261	EX_succ_e	10.8056	-10	0.0694611	4	31.7019	-5.75177	27.0716	-3.75903	8.38941	b2415, b3732, b3620, b1380	2DGLCptspp, ACGAptspp, ACMANAptspp, ACMUMptspp, ARBTptspp, ASCBptspp, ATPS4rpp, CELBpts, CHTBSptspp, DHAPT, FRUpts2pp, FRUptspp, GALTptspp, GAMptspp, GLCptspp, HEPT2, LDH_D, MALTptspp, MANGLYCptspp, MANptspp, MNLptspp, SBTptspp, SUCptspp, TREptspp
432	-54.8261	EX_succ_e	10.8056	-10	0.0694611	4	31.7019	-5.75177	27.0716	-3.75903	8.38941	b2415, b3619, b3732, b1380	2DGLCptspp, ACGAptspp, ACMANAptspp, ACMUMptspp, AGMHE, ARBTptspp, ASCBptspp, ATPS4rpp, CELBpts, CHTBSptspp, DHAPT, FRUpts2pp, FRUptspp, GALTptspp, GAMptspp, GLCptspp, LDH_D, MALTptspp, MANGLYCptspp, MANptspp, MNLptspp, SBTptspp, SUCptspp, TREptspp
433	-54.8261	EX_succ_e	10.8056	-10	0.0694611	4	31.7019	-5.75177	27.0716	-3.75903	8.38941	b3784, b2415, b3732, b1380	2DGLCptspp, ACGAMT, ACGAptspp, ACMANAptspp, ACMUMptspp, ARBTptspp, ASCBptspp, ATPS4rpp, CELBpts, CHTBSptspp, DHAPT, FRUpts2pp, FRUptspp, GALTptspp, GAMptspp, GLCptspp, LDH_D, MALTptspp, MANGLYCptspp, MANptspp, MNLptspp, SBTptspp, SUCptspp, TREptspp
434	-54.8261	EX_succ_e	10.8056	-10	0.0694611	4	31.7019	-5.75177	27.0716	-3.75903	8.38941	b2415, b3736, b1380, b3792	2DGLCptspp, ACGAptspp, ACMANAptspp, ACMUMptspp, ARBTptspp, ASCBptspp, ATPS4rpp, CELBpts, CHTBSptspp, DHAPT, ECAtpp, FRUpts2pp, FRUptspp, GALTptspp, GAMptspp, GLCptspp, LDH_D, MALTptspp, MANGLYCptspp, MANptspp, MNLptspp, SBTptspp, SUCptspp, TREptspp
435	-54.8261	EX_succ_e	10.8056	-10	0.0694611	4	31.7019	-5.75177	27.0716	-3.75903	8.38941	b0222, b2415, b3736, b1380	2DGLCptspp, ACGAptspp, ACMANAptspp, ACMUMptspp, ARBTptspp, ASCBptspp, ATPS4rpp, CELBpts, CHTBSptspp, DHAPT, FRUpts2pp, FRUptspp, GALTptspp, GAMptspp, GLCptspp, LDH_D, MALTptspp, MANGLYCptspp, MANptspp, MNLptspp, S7PI, SBTptspp, SUCptspp, TREptspp
436	-54.8261	EX_succ_e	10.8056	-10	0.0694611	4	31.7019	-5.75177	27.0716	-3.75903	8.38941	b2415, b3732, b3632, b1380	2DGLCptspp, ACGAptspp, ACMANAptspp, ACMUMptspp, ARBTptspp, ASCBptspp, ATPS4rpp, CELBpts, CHTBSptspp, DHAPT, FRUpts2pp, FRUptspp, GALTptspp, GAMptspp, GLCptspp, HEPT3, LDH_D, MALTptspp, MANGLYCptspp, MANptspp, MNLptspp, SBTptspp, SUCptspp, TREptspp
437	-54.8261	EX_succ_e	10.8056	-10	0.0694611	4	31.7019	-5.75177	27.0716	-3.75903	8.38941	b0200, b2415, b3736, b1380	2DGLCptspp, ACGAptspp, ACMANAptspp, ACMUMptspp, ARBTptspp, ASCBptspp, ATPS4rpp, CELBpts, CHTBSptspp, DHAPT, FRUpts2pp, FRUptspp, GALTptspp, GAMptspp, GLCptspp, GMHEPPA, LDH_D, MALTptspp, MANGLYCptspp, MANptspp, MNLptspp, SBTptspp, SUCptspp, TREptspp
438	-54.8261	EX_succ_e	10.8056	-10	0.0694611	4	31.7019	-5.75177	27.0716	-3.75903	8.38941	b2415, b3791, b3732, b1380	2DGLCptspp, ACGAptspp, ACMANAptspp, ACMUMptspp, ARBTptspp, ASCBptspp, ATPS4rpp, CELBpts, CHTBSptspp, DHAPT, FRUpts2pp, FRUptspp, GALTptspp, GAMptspp, GLCptspp, LDH_D, MALTptspp, MANGLYCptspp, MANptspp, MNLptspp, SBTptspp, SUCptspp, TDPAGTA, TREptspp
439	-54.8261	EX_succ_e	10.8056	-10	0.0694611	4	31.7019	-5.75177	27.0716	-3.75903	8.38941	b2415, b3732, b1380, b3623	2DGLCptspp, ACGAptspp, ACMANAptspp, ACMUMptspp, ARBTptspp, ASCBptspp, ATPS4rpp, CELBpts, CHTBSptspp, DHAPT, FRUpts2pp, FRUptspp, GALTptspp, GAMptspp, GLCptspp, HEPT4, LDH_D, MALTptspp, MANGLYCptspp, MANptspp, MNLptspp, SBTptspp, SUCptspp, TREptspp
440	-54.8261	EX_succ_e	10.8056	-10	0.0694611	4	31.7019	-5.75177	27.0716	-3.75903	8.38941	b2415, b3736, b3627, b1380	2DGLCptspp, ACGAptspp, ACMANAptspp, ACMUMptspp, ARBTptspp, ASCBptspp, ATPS4rpp, CELBpts, CHTBSptspp, DHAPT, FRUpts2pp, FRUptspp, GALTptspp, GAMptspp, GLCTR2, GLCptspp, LDH_D, MALTptspp, MANGLYCptspp, MANptspp, MNLptspp, SBTptspp, SUCptspp, TREptspp
441	-54.8261	EX_succ_e	10.8056	-10	0.0694611	4	31.7019	-5.75177	27.0716	-3.75903	8.38941	b2415, b3732, b3630, b1380	2DGLCptspp, ACGAptspp, ACMANAptspp, ACMUMptspp, ARBTptspp, ASCBptspp, ATPS4rpp, CELBpts, CHTBSptspp, DHAPT, FRUpts2pp, FRUptspp, GALTptspp, GAMptspp, GLCptspp, HEPK1, LDH_D, MALTptspp, MANGLYCptspp, MANptspp, MNLptspp, SBTptspp, SUCptspp, TREptspp
442	-54.8261	EX_succ_e	10.8056	-10	0.0694611	4	31.7019	-5.75177	27.0716	-3.75903	8.38941	b2415, b3736, b3620, b1380	2DGLCptspp, ACGAptspp, ACMANAptspp, ACMUMptspp, ARBTptspp, ASCBptspp, ATPS4rpp, CELBpts, CHTBSptspp, DHAPT, FRUpts2pp, FRUptspp, GALTptspp, GAMptspp, GLCptspp, HEPT2, LDH_D, MALTptspp, MANGLYCptspp, MANptspp, MNLptspp, SBTptspp, SUCptspp, TREptspp
443	-54.8261	EX_succ_e	10.8056	-10	0.0694611	4	31.7019	-5.75177	27.0716	-3.75903	8.38941	b2415, b3619, b3736, b1380	2DGLCptspp, ACGAptspp, ACMANAptspp, ACMUMptspp, AGMHE, ARBTptspp, ASCBptspp, ATPS4rpp, CELBpts, CHTBSptspp, DHAPT, FRUpts2pp, FRUptspp, GALTptspp, GAMptspp, GLCptspp, LDH_D, MALTptspp, MANGLYCptspp, MANptspp, MNLptspp, SBTptspp, SUCptspp, TREptspp
444	-54.8261	EX_succ_e	10.8056	-10	0.0694611	4	31.7019	-5.75177	27.0716	-3.75903	8.38941	b3784, b2415, b3736, b1380	2DGLCptspp, ACGAMT, ACGAptspp, ACMANAptspp, ACMUMptspp, ARBTptspp, ASCBptspp, ATPS4rpp, CELBpts, CHTBSptspp, DHAPT, FRUpts2pp, FRUptspp, GALTptspp, GAMptspp, GLCptspp, LDH_D, MALTptspp, MANGLYCptspp, MANptspp, MNLptspp, SBTptspp, SUCptspp, TREptspp
445	-54.8261	EX_succ_e	10.8056	-10	0.0694611	4	31.7019	-5.75177	27.0716	-3.75903	8.38941	b2415, b3732, b3631, b1380	2DGLCptspp, ACGAptspp, ACMANAptspp, ACMUMptspp, ARBTptspp, ASCBptspp, ATPS4rpp, CELBpts, CHTBSptspp, DHAPT, FRUpts2pp, FRUptspp, GALTptspp, GAMptspp, GLCTR1, GLCptspp, LDH_D, MALTptspp, MANGLYCptspp, MANptspp, MNLptspp, SBTptspp, SUCptspp, TREptspp
446	-54.8261	EX_succ_e	10.8056	-10	0.0694611	4	31.7019	-5.75177	27.0716	-3.75903	8.38941	b2415, b3732, b3626, b1380	2DGLCptspp, ACGAptspp, ACMANAptspp, ACMUMptspp, ARBTptspp, ASCBptspp, ATPS4rpp, CELBpts, CHTBSptspp, DHAPT, FRUpts2pp, FRUptspp, GALTptspp, GAMptspp, GLCTR3, GLCptspp, LDH_D, MALTptspp, MANGLYCptspp, MANptspp, MNLptspp, SBTptspp, SUCptspp, TREptspp
447	-54.8261	EX_succ_e	10.8056	-10	0.0694611	4	31.7019	-5.75177	27.0716	-3.75903	8.38941	b2415, b3736, b3632, b1380	2DGLCptspp, ACGAptspp, ACMANAptspp, ACMUMptspp, ARBTptspp, ASCBptspp, ATPS4rpp, CELBpts, CHTBSptspp, DHAPT, FRUpts2pp, FRUptspp, GALTptspp, GAMptspp, GLCptspp, HEPT3, LDH_D, MALTptspp, MANGLYCptspp, MANptspp, MNLptspp, SBTptspp, SUCptspp, TREptspp
448	-54.8261	EX_succ_e	10.8056	-10	0.0694611	4	31.7019	-5.75177	27.0716	-3.75903	8.38941	b2415, b3791, b3736, b1380	2DGLCptspp, ACGAptspp, ACMANAptspp, ACMUMptspp, ARBTptspp, ASCBptspp, ATPS4rpp, CELBpts, CHTBSptspp, DHAPT, FRUpts2pp, FRUptspp, GALTptspp, GAMptspp, GLCptspp, LDH_D, MALTptspp, MANGLYCptspp, MANptspp, MNLptspp, SBTptspp, SUCptspp, TDPAGTA, TREptspp
449	-54.8261	EX_succ_e	10.8056	-10	0.0694611	4	31.7019	-5.75177	27.0716	-3.75903	8.38941	b2038, b2415, b3732, b1380	2DGLCptspp, ACGAptspp, ACMANAptspp, ACMUMptspp, ARBTptspp, ASCBptspp, ATPS4rpp, CELBpts, CHTBSptspp, DHAPT, FRUpts2pp, FRUptspp, GALTptspp, GAMptspp, GLCptspp, LDH_D, MALTptspp, MANGLYCptspp, MANptspp, MNLptspp, SBTptspp, SUCptspp, TDPDRE, TREptspp
450	-54.8261	EX_succ_e	10.8056	-10	0.0694611	4	31.7019	-5.75177	27.0716	-3.75903	8.38941	b2415, b3732, b3621, b1380	2DGLCptspp, ACGAptspp, ACMANAptspp, ACMUMptspp, ARBTptspp, ASCBptspp, ATPS4rpp, CELBpts, CHTBSptspp, DHAPT, FRUpts2pp, FRUptspp, GALTptspp, GAMptspp, GLCptspp, HEPT1, LDH_D, MALTptspp, MANGLYCptspp, MANptspp, MNLptspp, SBTptspp, SUCptspp, TREptspp
451	-54.8261	EX_succ_e	10.8056	-10	0.0694611	4	31.7019	-5.75177	27.0716	-3.75903	8.38941	b4481, b2415, b3732, b1380	2DGLCptspp, AADDGT, ACGAptspp, ACMANAptspp, ACMUMptspp, ARBTptspp, ASCBptspp, ATPS4rpp, CELBpts, CHTBSptspp, DHAPT, FRUpts2pp, FRUptspp, GALTptspp, GAMptspp, GLCptspp, LDH_D, MALTptspp, MANGLYCptspp, MANptspp, MNLptspp, SBTptspp, SUCptspp, TREptspp
452	-54.8261	EX_succ_e	10.8056	-10	0.0694611	4	31.7019	-5.75177	27.0716	-3.75903	8.38941	b2415, b3736, b1380, b3623	2DGLCptspp, ACGAptspp, ACMANAptspp, ACMUMptspp, ARBTptspp, ASCBptspp, ATPS4rpp, CELBpts, CHTBSptspp, DHAPT, FRUpts2pp, FRUptspp, GALTptspp, GAMptspp, GLCptspp, HEPT4, LDH_D, MALTptspp, MANGLYCptspp, MANptspp, MNLptspp, SBTptspp, SUCptspp, TREptspp
453	-54.8261	EX_succ_e	10.8056	-10	0.0694611	4	31.7019	-5.75177	27.0716	-3.75903	8.38941	b2415, b3736, b3630, b1380	2DGLCptspp, ACGAptspp, ACMANAptspp, ACMUMptspp, ARBTptspp, ASCBptspp, ATPS4rpp, CELBpts, CHTBSptspp, DHAPT, FRUpts2pp, FRUptspp, GALTptspp, GAMptspp, GLCptspp, HEPK1, LDH_D, MALTptspp, MANGLYCptspp, MANptspp, MNLptspp, SBTptspp, SUCptspp, TREptspp
454	-54.8261	EX_succ_e	10.8056	-10	0.0694611	4	31.7019	-5.75177	27.0716	-3.75903	8.38941	b2415, b3736, b3631, b1380	2DGLCptspp, ACGAptspp, ACMANAptspp, ACMUMptspp, ARBTptspp, ASCBptspp, ATPS4rpp, CELBpts, CHTBSptspp, DHAPT, FRUpts2pp, FRUptspp, GALTptspp, GAMptspp, GLCTR1, GLCptspp, LDH_D, MALTptspp, MANGLYCptspp, MANptspp, MNLptspp, SBTptspp, SUCptspp, TREptspp
455	-54.8261	EX_succ_e	10.8056	-10	0.0694611	4	31.7019	-5.75177	27.0716	-3.75903	8.38941	b2415, b3736, b3626, b1380	2DGLCptspp, ACGAptspp, ACMANAptspp, ACMUMptspp, ARBTptspp, ASCBptspp, ATPS4rpp, CELBpts, CHTBSptspp, DHAPT, FRUpts2pp, FRUptspp, GALTptspp, GAMptspp, GLCTR3, GLCptspp, LDH_D, MALTptspp, MANGLYCptspp, MANptspp, MNLptspp, SBTptspp, SUCptspp, TREptspp
456	-54.8261	EX_succ_e	10.8056	-10	0.0694611	4	31.7019	-5.75177	27.0716	-3.75903	8.38941	b2415, b3732, b3625, b1380	2DGLCptspp, ACGAptspp, ACMANAptspp, ACMUMptspp, ARBTptspp, ASCBptspp, ATPS4rpp, CELBpts, CHTBSptspp, DHAPT, FRUpts2pp, FRUptspp, GALTptspp, GAMptspp, GLCptspp, HEPK2, LDH_D, MALTptspp, MANGLYCptspp, MANptspp, MNLptspp, SBTptspp, SUCptspp, TREptspp
457	-54.8261	EX_succ_e	10.8056	-10	0.0694611	4	31.7019	-5.75177	27.0716	-3.75903	8.38941	b2415, b3366, b3736, b1380	2DGLCptspp, ACGAptspp, ACMANAptspp, ACMUMptspp, ARBTptspp, ASCBptspp, ATPS4rpp, CELBpts, CHTBSptspp, DHAPT, FRUpts2pp, FRUptspp, GALTptspp, GAMptspp, GLCptspp, LDH_D, MALTptspp, MANGLYCptspp, MANptspp, MNLptspp, NTRIR2x, SBTptspp, SUCptspp, TREptspp
458	-54.8261	EX_succ_e	10.8056	-10	0.0694611	4	31.7019	-5.75177	27.0716	-3.75903	8.38941	b2415, b3365, b3736, b1380	2DGLCptspp, ACGAptspp, ACMANAptspp, ACMUMptspp, ARBTptspp, ASCBptspp, ATPS4rpp, CELBpts, CHTBSptspp, DHAPT, FRUpts2pp, FRUptspp, GALTptspp, GAMptspp, GLCptspp, LDH_D, MALTptspp, MANGLYCptspp, MANptspp, MNLptspp, NTRIR2x, SBTptspp, SUCptspp, TREptspp
459	-54.8261	EX_succ_e	10.8056	-10	0.0694611	4	31.7019	-5.75177	27.0716	-3.75903	8.38941	b2415, b3365, b3732, b1380	2DGLCptspp, ACGAptspp, ACMANAptspp, ACMUMptspp, ARBTptspp, ASCBptspp, ATPS4rpp, CELBpts, CHTBSptspp, DHAPT, FRUpts2pp, FRUptspp, GALTptspp, GAMptspp, GLCptspp, LDH_D, MALTptspp, MANGLYCptspp, MANptspp, MNLptspp, NTRIR2x, SBTptspp, SUCptspp, TREptspp
460	-54.8261	EX_succ_e	10.8056	-10	0.0694611	4	31.7019	-5.75177	27.0716	-3.75903	8.38941	b2415, b3366, b3732, b1380	2DGLCptspp, ACGAptspp, ACMANAptspp, ACMUMptspp, ARBTptspp, ASCBptspp, ATPS4rpp, CELBpts, CHTBSptspp, DHAPT, FRUpts2pp, FRUptspp, GALTptspp, GAMptspp, GLCptspp, LDH_D, MALTptspp, MANGLYCptspp, MANptspp, MNLptspp, NTRIR2x, SBTptspp, SUCptspp, TREptspp
461	-54.8261	EX_succ_e	10.8056	-10	0.0694611	4	31.7019	-5.75177	27.0716	-3.75903	8.38941	b2920, b2415, b3736, b1380	2DGLCptspp, ACGAptspp, ACMANAptspp, ACMUMptspp, ARBTptspp, ASCBptspp, ATPS4rpp, CELBpts, CHTBSptspp, DHAPT, FRUpts2pp, FRUptspp, GALTptspp, GAMptspp, GLCptspp, LDH_D, MALTptspp, MANGLYCptspp, MANptspp, MNLptspp, PPCSCT, SBTptspp, SUCptspp, TREptspp
462	-54.8261	EX_succ_e	10.8056	-10	0.0694611	4	31.7019	-5.75177	27.0716	-3.75903	8.38941	b2415, b2239, b3732, b1380	2DGLCptspp, ACGAptspp, ACMANAptspp, ACMUMptspp, ARBTptspp, ASCBptspp, ATPS4rpp, CELBpts, CHTBSptspp, DHAPT, FRUpts2pp, FRUptspp, GALTptspp, GAMptspp, GLCptspp, GPDDA1pp, GPDDA2pp, GPDDA3pp, GPDDA4pp, GPDDA5pp, LDH_D, MALTptspp, MANGLYCptspp, MANptspp, MNLptspp, SBTptspp, SUCptspp, TREptspp
463	-54.8261	EX_succ_e	10.8056	-10	0.0694611	4	31.7019	-5.75177	27.0716	-3.75903	8.38941	b2415, b2239, b3736, b1380	2DGLCptspp, ACGAptspp, ACMANAptspp, ACMUMptspp, ARBTptspp, ASCBptspp, ATPS4rpp, CELBpts, CHTBSptspp, DHAPT, FRUpts2pp, FRUptspp, GALTptspp, GAMptspp, GLCptspp, GPDDA1pp, GPDDA2pp, GPDDA3pp, GPDDA4pp, GPDDA5pp, LDH_D, MALTptspp, MANGLYCptspp, MANptspp, MNLptspp, SBTptspp, SUCptspp, TREptspp
464	-54.8261	EX_succ_e	10.8056	-10	0.0694611	4	31.7019	-5.75177	27.0716	-3.75903	8.38941	b2415, b4111, b3732, b1380	2DGLCptspp, ACGAptspp, ACMANAptspp, ACMUMptspp, ARBTptspp, ASCBptspp, ATPS4rpp, CELBpts, CHTBSptspp, CRNDt2rpp, CRNt2rpp, CTBTt2rpp, DHAPT, FRUpts2pp, FRUptspp, GALTptspp, GAMptspp, GLCptspp, LDH_D, MALTptspp, MANGLYCptspp, MANptspp, MNLptspp, SBTptspp, SUCptspp, TREptspp
465	-54.8261	EX_succ_e	10.8056	-10	0.0694611	4	31.7019	-5.75177	27.0716	-3.75903	8.38941	b2415, b4111, b3736, b1380	2DGLCptspp, ACGAptspp, ACMANAptspp, ACMUMptspp, ARBTptspp, ASCBptspp, ATPS4rpp, CELBpts, CHTBSptspp, CRNDt2rpp, CRNt2rpp, CTBTt2rpp, DHAPT, FRUpts2pp, FRUptspp, GALTptspp, GAMptspp, GLCptspp, LDH_D, MALTptspp, MANGLYCptspp, MANptspp, MNLptspp, SBTptspp, SUCptspp, TREptspp
466	-54.8261	EX_succ_e	10.8056	-10	0.0694611	4	31.7019	-5.75177	27.0716	-3.75903	8.38941	b2415, b3732, b1380, b2373	2DGLCptspp, ACGAptspp, ACMANAptspp, ACMUMptspp, ARBTptspp, ASCBptspp, ATPS4rpp, CELBpts, CHTBSptspp, DHAPT, FRUpts2pp, FRUptspp, GALTptspp, GAMptspp, GLCptspp, LDH_D, MALTptspp, MANGLYCptspp, MANptspp, MNLptspp, OXCDC, SBTptspp, SUCptspp, TREptspp
467	-54.8261	EX_succ_e	10.8056	-10	0.0694611	4	31.7019	-5.75177	27.0716	-3.75903	8.38941	b2415, b3736, b1380, b2373	2DGLCptspp, ACGAptspp, ACMANAptspp, ACMUMptspp, ARBTptspp, ASCBptspp, ATPS4rpp, CELBpts, CHTBSptspp, DHAPT, FRUpts2pp, FRUptspp, GALTptspp, GAMptspp, GLCptspp, LDH_D, MALTptspp, MANGLYCptspp, MANptspp, MNLptspp, OXCDC, SBTptspp, SUCptspp, TREptspp
468	-54.8261	EX_succ_e	10.8056	-10	0.0694611	4	31.7019	-5.75177	27.0716	-3.75903	8.38941	b2415, b3732, b1380, b2374	2DGLCptspp, ACGAptspp, ACMANAptspp, ACMUMptspp, ARBTptspp, ASCBptspp, ATPS4rpp, CELBpts, CHTBSptspp, DHAPT, FORCT, FRUpts2pp, FRUptspp, GALTptspp, GAMptspp, GLCptspp, LDH_D, MALTptspp, MANGLYCptspp, MANptspp, MNLptspp, SBTptspp, SUCptspp, TREptspp
469	-54.8261	EX_succ_e	10.8056	-10	0.0694611	4	31.7019	-5.75177	27.0716	-3.75903	8.38941	b2415, b3736, b1380, b2374	2DGLCptspp, ACGAptspp, ACMANAptspp, ACMUMptspp, ARBTptspp, ASCBptspp, ATPS4rpp, CELBpts, CHTBSptspp, DHAPT, FORCT, FRUpts2pp, FRUptspp, GALTptspp, GAMptspp, GLCptspp, LDH_D, MALTptspp, MANGLYCptspp, MANptspp, MNLptspp, SBTptspp, SUCptspp, TREptspp
470	-54.8261	EX_succ_e	10.8056	-10	0.0694611	4	31.7019	-5.75177	27.0716	-3.75903	8.38941	b2415, b3732, b1380, b2371	2DGLCptspp, ACGAptspp, ACMANAptspp, ACMUMptspp, ACOXT, ARBTptspp, ASCBptspp, ATPS4rpp, CELBpts, CHTBSptspp, DHAPT, FRUpts2pp, FRUptspp, GALTptspp, GAMptspp, GLCptspp, LDH_D, MALTptspp, MANGLYCptspp, MANptspp, MNLptspp, SBTptspp, SUCptspp, TREptspp
471	-54.8261	EX_succ_e	10.8056	-10	0.0694611	4	31.7019	-5.75177	27.0716	-3.75903	8.38941	b2415, b3736, b1380, b2371	2DGLCptspp, ACGAptspp, ACMANAptspp, ACMUMptspp, ACOXT, ARBTptspp, ASCBptspp, ATPS4rpp, CELBpts, CHTBSptspp, DHAPT, FRUpts2pp, FRUptspp, GALTptspp, GAMptspp, GLCptspp, LDH_D, MALTptspp, MANGLYCptspp, MANptspp, MNLptspp, SBTptspp, SUCptspp, TREptspp
472	-54.8261	EX_succ_e	10.8056	-10	0.0694611	4	31.7019	-5.75177	27.0716	-3.75903	8.38941	b2415, b3736, b1380, b3540	2DGLCptspp, ACGAptspp, ACMANAptspp, ACMUMptspp, ARBTptspp, ASCBptspp, ATPS4rpp, CELBpts, CGLYabcpp, CHTBSptspp, DHAPT, FRUpts2pp, FRUptspp, GALTptspp, GAMptspp, GLCptspp, LDH_D, MALTptspp, MANGLYCptspp, MANptspp, MNLptspp, PROGLYabcpp, SBTptspp, SUCptspp, TREptspp
473	-54.8261	EX_succ_e	10.8056	-10	0.0694611	4	31.7019	-5.75177	27.0716	-3.75903	8.38941	b2415, b3736, b1380, b3544	2DGLCptspp, ACGAptspp, ACMANAptspp, ACMUMptspp, ARBTptspp, ASCBptspp, ATPS4rpp, CELBpts, CGLYabcpp, CHTBSptspp, DHAPT, FRUpts2pp, FRUptspp, GALTptspp, GAMptspp, GLCptspp, LDH_D, MALTptspp, MANGLYCptspp, MANptspp, MNLptspp, PROGLYabcpp, SBTptspp, SUCptspp, TREptspp
474	-54.8261	EX_succ_e	10.8056	-10	0.0694611	4	31.7019	-5.75177	27.0716	-3.75903	8.38941	b2415, b3732, b1380, b3543	2DGLCptspp, ACGAptspp, ACMANAptspp, ACMUMptspp, ARBTptspp, ASCBptspp, ATPS4rpp, CELBpts, CGLYabcpp, CHTBSptspp, DHAPT, FRUpts2pp, FRUptspp, GALTptspp, GAMptspp, GLCptspp, LDH_D, MALTptspp, MANGLYCptspp, MANptspp, MNLptspp, PROGLYabcpp, SBTptspp, SUCptspp, TREptspp
475	-54.8261	EX_succ_e	10.8056	-10	0.0694611	4	31.7019	-5.75177	27.0716	-3.75903	8.38941	b2415, b3732, b1380, b3541	2DGLCptspp, ACGAptspp, ACMANAptspp, ACMUMptspp, ARBTptspp, ASCBptspp, ATPS4rpp, CELBpts, CGLYabcpp, CHTBSptspp, DHAPT, FRUpts2pp, FRUptspp, GALTptspp, GAMptspp, GLCptspp, LDH_D, MALTptspp, MANGLYCptspp, MANptspp, MNLptspp, PROGLYabcpp, SBTptspp, SUCptspp, TREptspp
476	-54.8261	EX_succ_e	10.8056	-10	0.0694611	4	31.7019	-5.75177	27.0716	-3.75903	8.38941	b2415, b3732, b1380, b3542	2DGLCptspp, ACGAptspp, ACMANAptspp, ACMUMptspp, ARBTptspp, ASCBptspp, ATPS4rpp, CELBpts, CGLYabcpp, CHTBSptspp, DHAPT, FRUpts2pp, FRUptspp, GALTptspp, GAMptspp, GLCptspp, LDH_D, MALTptspp, MANGLYCptspp, MANptspp, MNLptspp, PROGLYabcpp, SBTptspp, SUCptspp, TREptspp
477	-54.8261	EX_succ_e	10.8056	-10	0.0694611	4	31.7019	-5.75177	27.0716	-3.75903	8.38941	b2415, b3736, b1380, b3543	2DGLCptspp, ACGAptspp, ACMANAptspp, ACMUMptspp, ARBTptspp, ASCBptspp, ATPS4rpp, CELBpts, CGLYabcpp, CHTBSptspp, DHAPT, FRUpts2pp, FRUptspp, GALTptspp, GAMptspp, GLCptspp, LDH_D, MALTptspp, MANGLYCptspp, MANptspp, MNLptspp, PROGLYabcpp, SBTptspp, SUCptspp, TREptspp
478	-54.8261	EX_succ_e	10.8056	-10	0.0694611	4	31.7019	-5.75177	27.0716	-3.75903	8.38941	b2415, b3736, b1380, b3541	2DGLCptspp, ACGAptspp, ACMANAptspp, ACMUMptspp, ARBTptspp, ASCBptspp, ATPS4rpp, CELBpts, CGLYabcpp, CHTBSptspp, DHAPT, FRUpts2pp, FRUptspp, GALTptspp, GAMptspp, GLCptspp, LDH_D, MALTptspp, MANGLYCptspp, MANptspp, MNLptspp, PROGLYabcpp, SBTptspp, SUCptspp, TREptspp
479	-54.8261	EX_succ_e	10.8056	-10	0.0694611	4	31.7019	-5.75177	27.0716	-3.75903	8.38941	b2415, b3736, b1380, b3542	2DGLCptspp, ACGAptspp, ACMANAptspp, ACMUMptspp, ARBTptspp, ASCBptspp, ATPS4rpp, CELBpts, CGLYabcpp, CHTBSptspp, DHAPT, FRUpts2pp, FRUptspp, GALTptspp, GAMptspp, GLCptspp, LDH_D, MALTptspp, MANGLYCptspp, MANptspp, MNLptspp, PROGLYabcpp, SBTptspp, SUCptspp, TREptspp
480	-54.8261	EX_succ_e	10.8056	-10	0.0694611	4	31.7019	-5.75177	27.0716	-3.75903	8.38941	b2415, b3732, b1380, b0356	2DGLCptspp, ACGAptspp, ACMANAptspp, ACMUMptspp, ARBTptspp, ASCBptspp, ATPS4rpp, CELBpts, CHTBSptspp, DHAPT, FALDH2, FRUpts2pp, FRUptspp, GALTptspp, GAMptspp, GLCptspp, LDH_D, MALTptspp, MANGLYCptspp, MANptspp, MNLptspp, SBTptspp, SUCptspp, TREptspp
481	-54.8261	EX_succ_e	10.8056	-10	0.0694611	4	31.7019	-5.75177	27.0716	-3.75903	8.38941	b2415, b3736, b1380, b0356	2DGLCptspp, ACGAptspp, ACMANAptspp, ACMUMptspp, ARBTptspp, ASCBptspp, ATPS4rpp, CELBpts, CHTBSptspp, DHAPT, FALDH2, FRUpts2pp, FRUptspp, GALTptspp, GAMptspp, GLCptspp, LDH_D, MALTptspp, MANGLYCptspp, MANptspp, MNLptspp, SBTptspp, SUCptspp, TREptspp
482	-54.8261	EX_succ_e	10.8056	-10	0.0694611	4	31.7019	-5.75177	27.0716	-3.75903	8.38941	b2415, b0615, b3736, b1380	2DGLCptspp, ACGAptspp, ACMANAptspp, ACMUMptspp, ARBTptspp, ASCBptspp, ATPS4rpp, CELBpts, CHTBSptspp, CITL, DHAPT, FRUpts2pp, FRUptspp, GALTptspp, GAMptspp, GLCptspp, LDH_D, MALTptspp, MANGLYCptspp, MANptspp, MNLptspp, SBTptspp, SUCptspp, TREptspp
483	-54.8261	EX_succ_e	10.8056	-10	0.0694611	4	31.7019	-5.75177	27.0716	-3.75903	8.38941	b2415, b0614, b3732, b1380	2DGLCptspp, ACGAptspp, ACMANAptspp, ACMUMptspp, ARBTptspp, ASCBptspp, ATPS4rpp, CELBpts, CHTBSptspp, CITL, DHAPT, FRUpts2pp, FRUptspp, GALTptspp, GAMptspp, GLCptspp, LDH_D, MALTptspp, MANGLYCptspp, MANptspp, MNLptspp, SBTptspp, SUCptspp, TREptspp
484	-54.8261	EX_succ_e	10.8056	-10	0.0694611	4	31.7019	-5.75177	27.0716	-3.75903	8.38941	b2415, b0616, b3732, b1380	2DGLCptspp, ACGAptspp, ACMANAptspp, ACMUMptspp, ARBTptspp, ASCBptspp, ATPS4rpp, CELBpts, CHTBSptspp, CITL, DHAPT, FRUpts2pp, FRUptspp, GALTptspp, GAMptspp, GLCptspp, LDH_D, MALTptspp, MANGLYCptspp, MANptspp, MNLptspp, SBTptspp, SUCptspp, TREptspp
485	-54.8261	EX_succ_e	10.8056	-10	0.0694611	4	31.7019	-5.75177	27.0716	-3.75903	8.38941	b2415, b0614, b3736, b1380	2DGLCptspp, ACGAptspp, ACMANAptspp, ACMUMptspp, ARBTptspp, ASCBptspp, ATPS4rpp, CELBpts, CHTBSptspp, CITL, DHAPT, FRUpts2pp, FRUptspp, GALTptspp, GAMptspp, GLCptspp, LDH_D, MALTptspp, MANGLYCptspp, MANptspp, MNLptspp, SBTptspp, SUCptspp, TREptspp
486	-54.8261	EX_succ_e	10.8056	-10	0.0694611	4	31.7019	-5.75177	27.0716	-3.75903	8.38941	b2415, b0616, b3736, b1380	2DGLCptspp, ACGAptspp, ACMANAptspp, ACMUMptspp, ARBTptspp, ASCBptspp, ATPS4rpp, CELBpts, CHTBSptspp, CITL, DHAPT, FRUpts2pp, FRUptspp, GALTptspp, GAMptspp, GLCptspp, LDH_D, MALTptspp, MANGLYCptspp, MANptspp, MNLptspp, SBTptspp, SUCptspp, TREptspp
487	-54.8261	EX_succ_e	10.8056	-10	0.0694611	4	31.7019	-5.75177	27.0716	-3.75903	8.38941	b2415, b0617, b3732, b1380	2DGLCptspp, ACGAptspp, ACMANAptspp, ACMUMptspp, ARBTptspp, ASCBptspp, ATPS4rpp, CELBpts, CHTBSptspp, CITL, DHAPT, FRUpts2pp, FRUptspp, GALTptspp, GAMptspp, GLCptspp, LDH_D, MALTptspp, MANGLYCptspp, MANptspp, MNLptspp, SBTptspp, SUCptspp, TREptspp
488	-54.8261	EX_succ_e	10.8056	-10	0.0694611	4	31.7019	-5.75177	27.0716	-3.75903	8.38941	b2415, b0617, b3736, b1380	2DGLCptspp, ACGAptspp, ACMANAptspp, ACMUMptspp, ARBTptspp, ASCBptspp, ATPS4rpp, CELBpts, CHTBSptspp, CITL, DHAPT, FRUpts2pp, FRUptspp, GALTptspp, GAMptspp, GLCptspp, LDH_D, MALTptspp, MANGLYCptspp, MANptspp, MNLptspp, SBTptspp, SUCptspp, TREptspp
489	-54.8261	EX_succ_e	10.8056	-10	0.0694611	4	31.7019	-5.75177	27.0716	-3.75903	8.38941	b2415, b0615, b3732, b1380	2DGLCptspp, ACGAptspp, ACMANAptspp, ACMUMptspp, ARBTptspp, ASCBptspp, ATPS4rpp, CELBpts, CHTBSptspp, CITL, DHAPT, FRUpts2pp, FRUptspp, GALTptspp, GAMptspp, GLCptspp, LDH_D, MALTptspp, MANGLYCptspp, MANptspp, MNLptspp, SBTptspp, SUCptspp, TREptspp
490	-54.8261	EX_succ_e	10.8056	-10	0.0694611	4	31.7019	-5.75177	27.0716	-3.75903	8.38941	b2415, b3732, b1380, b2156	2DGLCptspp, ACGAptspp, ACMANAptspp, ACMUMptspp, ARBTptspp, ASCBptspp, ATPS4rpp, CELBpts, CHTBSptspp, DHAPT, FRUpts2pp, FRUptspp, GALTptspp, GAMptspp, GLCptspp, LDH_D, LYSt2pp, MALTptspp, MANGLYCptspp, MANptspp, MNLptspp, SBTptspp, SUCptspp, TREptspp
491	-54.8261	EX_succ_e	10.8056	-10	0.0694611	4	31.7019	-5.75177	27.0716	-3.75903	8.38941	b2415, b3736, b1380, b2156	2DGLCptspp, ACGAptspp, ACMANAptspp, ACMUMptspp, ARBTptspp, ASCBptspp, ATPS4rpp, CELBpts, CHTBSptspp, DHAPT, FRUpts2pp, FRUptspp, GALTptspp, GAMptspp, GLCptspp, LDH_D, LYSt2pp, MALTptspp, MANGLYCptspp, MANptspp, MNLptspp, SBTptspp, SUCptspp, TREptspp
492	-54.8261	EX_succ_e	10.8056	-10	0.0694611	4	31.7019	-5.75177	27.0716	-3.75903	8.38941	b2415, b0344, b3732, b1380	2DGLCptspp, ACGAptspp, ACMANAptspp, ACMUMptspp, ARBTptspp, ASCBptspp, ATPS4rpp, CELBpts, CHTBSptspp, DHAPT, FRUpts2pp, FRUptspp, GALTptspp, GAMptspp, GLCptspp, LACZ, LDH_D, MALTptspp, MANGLYCptspp, MANptspp, MNLptspp, SBTptspp, SUCptspp, TREptspp
493	-54.8261	EX_succ_e	10.8056	-10	0.0694611	4	31.7019	-5.75177	27.0716	-3.75903	8.38941	b2415, b0344, b3736, b1380	2DGLCptspp, ACGAptspp, ACMANAptspp, ACMUMptspp, ARBTptspp, ASCBptspp, ATPS4rpp, CELBpts, CHTBSptspp, DHAPT, FRUpts2pp, FRUptspp, GALTptspp, GAMptspp, GLCptspp, LACZ, LDH_D, MALTptspp, MANGLYCptspp, MANptspp, MNLptspp, SBTptspp, SUCptspp, TREptspp
494	-54.8261	EX_succ_e	10.8056	-10	0.0694611	4	31.7019	-5.75177	27.0716	-3.75903	8.38941	b2415, b3732, b1380, b1985	2DGLCptspp, ACGAptspp, ACMANAptspp, ACMUMptspp, ARBTptspp, ASCBptspp, ATPS4rpp, CELBpts, CHTBSptspp, DHAPT, FADt, FMNt, FRUpts2pp, FRUptspp, GALTptspp, GAMptspp, GLCptspp, LDH_D, MALTptspp, MANGLYCptspp, MANptspp, MNLptspp, SBTptspp, SUCptspp, TREptspp
495	-54.8261	EX_succ_e	10.8056	-10	0.0694611	4	31.7019	-5.75177	27.0716	-3.75903	8.38941	b2415, b3736, b1380, b1985	2DGLCptspp, ACGAptspp, ACMANAptspp, ACMUMptspp, ARBTptspp, ASCBptspp, ATPS4rpp, CELBpts, CHTBSptspp, DHAPT, FADt, FMNt, FRUpts2pp, FRUptspp, GALTptspp, GAMptspp, GLCptspp, LDH_D, MALTptspp, MANGLYCptspp, MANptspp, MNLptspp, SBTptspp, SUCptspp, TREptspp
496	-54.8261	EX_succ_e	10.8056	-10	0.0694611	4	31.7019	-5.75177	27.0716	-3.75903	8.38941	b2415, b2049, b3736, b1380	2DGLCptspp, ACGAptspp, ACMANAptspp, ACMUMptspp, ARBTptspp, ASCBptspp, ATPS4rpp, CELBpts, CHTBSptspp, DHAPT, FRUpts2pp, FRUptspp, GALTptspp, GAMptspp, GLCptspp, LDH_D, MALTptspp, MAN1PT2, MANGLYCptspp, MANptspp, MNLptspp, SBTptspp, SUCptspp, TREptspp
497	-54.8261	EX_succ_e	10.8056	-10	0.0694611	4	31.7019	-5.75177	27.0716	-3.75903	8.38941	b2415, b2049, b3732, b1380	2DGLCptspp, ACGAptspp, ACMANAptspp, ACMUMptspp, ARBTptspp, ASCBptspp, ATPS4rpp, CELBpts, CHTBSptspp, DHAPT, FRUpts2pp, FRUptspp, GALTptspp, GAMptspp, GLCptspp, LDH_D, MALTptspp, MAN1PT2, MANGLYCptspp, MANptspp, MNLptspp, SBTptspp, SUCptspp, TREptspp
498	-54.8261	EX_succ_e	10.8056	-10	0.0694611	4	31.7019	-5.75177	27.0716	-3.75903	8.38941	b2415, b3732, b4265, b1380	2DGLCptspp, 5DGLCNt2rpp, ACGAptspp, ACMANAptspp, ACMUMptspp, ARBTptspp, ASCBptspp, ATPS4rpp, CELBpts, CHTBSptspp, DHAPT, FRUpts2pp, FRUptspp, GALTptspp, GAMptspp, GLCptspp, IDONt2rpp, LDH_D, MALTptspp, MANGLYCptspp, MANptspp, MNLptspp, SBTptspp, SUCptspp, TREptspp
499	-54.8261	EX_succ_e	10.8056	-10	0.0694611	4	31.7019	-5.75177	27.0716	-3.75903	8.38941	b2415, b3736, b4265, b1380	2DGLCptspp, 5DGLCNt2rpp, ACGAptspp, ACMANAptspp, ACMUMptspp, ARBTptspp, ASCBptspp, ATPS4rpp, CELBpts, CHTBSptspp, DHAPT, FRUpts2pp, FRUptspp, GALTptspp, GAMptspp, GLCptspp, IDONt2rpp, LDH_D, MALTptspp, MANGLYCptspp, MANptspp, MNLptspp, SBTptspp, SUCptspp, TREptspp
500	-54.8261	EX_succ_e	10.8056	-10	0.0694611	4	31.7019	-5.75177	27.0716	-3.75903	8.38941	b2415, b3732, b2133, b1380	2DGLCptspp, ACGAptspp, ACMANAptspp, ACMUMptspp, ARBTptspp, ASCBptspp, ATPS4rpp, CELBpts, CHTBSptspp, DHAPT, FRUpts2pp, FRUptspp, GALTptspp, GAMptspp, GLCptspp, LDH_D, LDH_D2, MALTptspp, MANGLYCptspp, MANptspp, MNLptspp, SBTptspp, SUCptspp, TREptspp
501	-54.8261	EX_succ_e	10.8056	-10	0.0694611	4	31.7019	-5.75177	27.0716	-3.75903	8.38941	b2415, b3736, b2133, b1380	2DGLCptspp, ACGAptspp, ACMANAptspp, ACMUMptspp, ARBTptspp, ASCBptspp, ATPS4rpp, CELBpts, CHTBSptspp, DHAPT, FRUpts2pp, FRUptspp, GALTptspp, GAMptspp, GLCptspp, LDH_D, LDH_D2, MALTptspp, MANGLYCptspp, MANptspp, MNLptspp, SBTptspp, SUCptspp, TREptspp
502	-54.8261	EX_succ_e	10.8056	-10	0.0694611	4	31.7019	-5.75177	27.0716	-3.75903	8.38941	b2415, b3732, b4288, b1380	2DGLCptspp, ACGAptspp, ACMANAptspp, ACMUMptspp, ARBTptspp, ASCBptspp, ATPS4rpp, CELBpts, CHTBSptspp, DHAPT, FE3DCITabcpp, FRUpts2pp, FRUptspp, GALTptspp, GAMptspp, GLCptspp, LDH_D, MALTptspp, MANGLYCptspp, MANptspp, MNLptspp, SBTptspp, SUCptspp, TREptspp
503	-54.8261	EX_succ_e	10.8056	-10	0.0694611	4	31.7019	-5.75177	27.0716	-3.75903	8.38941	b2415, b3736, b4287, b1380	2DGLCptspp, ACGAptspp, ACMANAptspp, ACMUMptspp, ARBTptspp, ASCBptspp, ATPS4rpp, CELBpts, CHTBSptspp, DHAPT, FE3DCITabcpp, FRUpts2pp, FRUptspp, GALTptspp, GAMptspp, GLCptspp, LDH_D, MALTptspp, MANGLYCptspp, MANptspp, MNLptspp, SBTptspp, SUCptspp, TREptspp
504	-54.8261	EX_succ_e	10.8056	-10	0.0694611	4	31.7019	-5.75177	27.0716	-3.75903	8.38941	b2415, b3732, b4291, b1380	2DGLCptspp, ACGAptspp, ACMANAptspp, ACMUMptspp, ARBTptspp, ASCBptspp, ATPS4rpp, CELBpts, CHTBSptspp, DHAPT, FE3DCITtonex, FRUpts2pp, FRUptspp, GALTptspp, GAMptspp, GLCptspp, LDH_D, MALTptspp, MANGLYCptspp, MANptspp, MNLptspp, SBTptspp, SUCptspp, TREptspp
505	-54.8261	EX_succ_e	10.8056	-10	0.0694611	4	31.7019	-5.75177	27.0716	-3.75903	8.38941	b2415, b3736, b4290, b1380	2DGLCptspp, ACGAptspp, ACMANAptspp, ACMUMptspp, ARBTptspp, ASCBptspp, ATPS4rpp, CELBpts, CHTBSptspp, DHAPT, FE3DCITabcpp, FRUpts2pp, FRUptspp, GALTptspp, GAMptspp, GLCptspp, LDH_D, MALTptspp, MANGLYCptspp, MANptspp, MNLptspp, SBTptspp, SUCptspp, TREptspp
506	-54.8261	EX_succ_e	10.8056	-10	0.0694611	4	31.7019	-5.75177	27.0716	-3.75903	8.38941	b2415, b3736, b4288, b1380	2DGLCptspp, ACGAptspp, ACMANAptspp, ACMUMptspp, ARBTptspp, ASCBptspp, ATPS4rpp, CELBpts, CHTBSptspp, DHAPT, FE3DCITabcpp, FRUpts2pp, FRUptspp, GALTptspp, GAMptspp, GLCptspp, LDH_D, MALTptspp, MANGLYCptspp, MANptspp, MNLptspp, SBTptspp, SUCptspp, TREptspp
507	-54.8261	EX_succ_e	10.8056	-10	0.0694611	4	31.7019	-5.75177	27.0716	-3.75903	8.38941	b2415, b3736, b4291, b1380	2DGLCptspp, ACGAptspp, ACMANAptspp, ACMUMptspp, ARBTptspp, ASCBptspp, ATPS4rpp, CELBpts, CHTBSptspp, DHAPT, FE3DCITtonex, FRUpts2pp, FRUptspp, GALTptspp, GAMptspp, GLCptspp, LDH_D, MALTptspp, MANGLYCptspp, MANptspp, MNLptspp, SBTptspp, SUCptspp, TREptspp
508	-54.8261	EX_succ_e	10.8056	-10	0.0694611	4	31.7019	-5.75177	27.0716	-3.75903	8.38941	b2415, b3732, b4289, b1380	2DGLCptspp, ACGAptspp, ACMANAptspp, ACMUMptspp, ARBTptspp, ASCBptspp, ATPS4rpp, CELBpts, CHTBSptspp, DHAPT, FE3DCITabcpp, FRUpts2pp, FRUptspp, GALTptspp, GAMptspp, GLCptspp, LDH_D, MALTptspp, MANGLYCptspp, MANptspp, MNLptspp, SBTptspp, SUCptspp, TREptspp
509	-54.8261	EX_succ_e	10.8056	-10	0.0694611	4	31.7019	-5.75177	27.0716	-3.75903	8.38941	b2415, b3736, b4289, b1380	2DGLCptspp, ACGAptspp, ACMANAptspp, ACMUMptspp, ARBTptspp, ASCBptspp, ATPS4rpp, CELBpts, CHTBSptspp, DHAPT, FE3DCITabcpp, FRUpts2pp, FRUptspp, GALTptspp, GAMptspp, GLCptspp, LDH_D, MALTptspp, MANGLYCptspp, MANptspp, MNLptspp, SBTptspp, SUCptspp, TREptspp
510	-54.8261	EX_succ_e	10.8056	-10	0.0694611	4	31.7019	-5.75177	27.0716	-3.75903	8.38941	b2415, b3732, b4287, b1380	2DGLCptspp, ACGAptspp, ACMANAptspp, ACMUMptspp, ARBTptspp, ASCBptspp, ATPS4rpp, CELBpts, CHTBSptspp, DHAPT, FE3DCITabcpp, FRUpts2pp, FRUptspp, GALTptspp, GAMptspp, GLCptspp, LDH_D, MALTptspp, MANGLYCptspp, MANptspp, MNLptspp, SBTptspp, SUCptspp, TREptspp
511	-54.8261	EX_succ_e	10.8056	-10	0.0694611	4	31.7019	-5.75177	27.0716	-3.75903	8.38941	b2415, b3732, b4290, b1380	2DGLCptspp, ACGAptspp, ACMANAptspp, ACMUMptspp, ARBTptspp, ASCBptspp, ATPS4rpp, CELBpts, CHTBSptspp, DHAPT, FE3DCITabcpp, FRUpts2pp, FRUptspp, GALTptspp, GAMptspp, GLCptspp, LDH_D, MALTptspp, MANGLYCptspp, MANptspp, MNLptspp, SBTptspp, SUCptspp, TREptspp
512	-54.8261	EX_succ_e	10.8056	-10	0.0694611	4	31.7019	-5.75177	27.0716	-3.75903	8.38941	b2415, b3732, b1380, b4020	2DGLCptspp, ACGAptspp, ACMANAptspp, ACMUMptspp, ARBTptspp, ASCBptspp, ATPS4rpp, CELBpts, CHTBSptspp, DHAPT, FRUpts2pp, FRUptspp, GALTptspp, GAMptspp, GLCptspp, LDH_D, MALTptspp, MANGLYCptspp, MANptspp, MNLptspp, PItpp, SBTptspp, SUCptspp, TREptspp
513	-54.8261	EX_succ_e	10.8056	-10	0.0694611	4	31.7019	-5.75177	27.0716	-3.75903	8.38941	b2415, b3736, b1380, b4020	2DGLCptspp, ACGAptspp, ACMANAptspp, ACMUMptspp, ARBTptspp, ASCBptspp, ATPS4rpp, CELBpts, CHTBSptspp, DHAPT, FRUpts2pp, FRUptspp, GALTptspp, GAMptspp, GLCptspp, LDH_D, MALTptspp, MANGLYCptspp, MANptspp, MNLptspp, PItpp, SBTptspp, SUCptspp, TREptspp
514	-54.8261	EX_succ_e	10.8056	-10	0.0694611	4	31.7019	-5.75177	27.0716	-3.75903	8.38941	b3124, b2415, b3732, b1380	2DGLCptspp, ACGAptspp, ACMANAptspp, ACMUMptspp, ARBTptspp, ASCBptspp, ATPS4rpp, CELBpts, CHTBSptspp, DHAPT, FRUpts2pp, FRUptspp, GALTptspp, GAMptspp, GLCptspp, GLYCK2, LDH_D, MALTptspp, MANGLYCptspp, MANptspp, MNLptspp, SBTptspp, SUCptspp, TREptspp
515	-54.8261	EX_succ_e	10.8056	-10	0.0694611	4	31.7019	-5.75177	27.0716	-3.75903	8.38941	b3124, b2415, b3736, b1380	2DGLCptspp, ACGAptspp, ACMANAptspp, ACMUMptspp, ARBTptspp, ASCBptspp, ATPS4rpp, CELBpts, CHTBSptspp, DHAPT, FRUpts2pp, FRUptspp, GALTptspp, GAMptspp, GLCptspp, GLYCK2, LDH_D, MALTptspp, MANGLYCptspp, MANptspp, MNLptspp, SBTptspp, SUCptspp, TREptspp
516	-54.8261	EX_succ_e	10.8056	-10	0.0694611	4	31.7019	-5.75177	27.0716	-3.75903	8.38941	b2415, b3736, b1489, b1380	2DGLCptspp, ACGAptspp, ACMANAptspp, ACMUMptspp, ARBTptspp, ASCBptspp, ATPS4rpp, CELBpts, CHTBSptspp, DHAPT, FRUpts2pp, FRUptspp, GALTptspp, GAMptspp, GLCptspp, LDH_D, MALTptspp, MANGLYCptspp, MANptspp, MNLptspp, PDE4, SBTptspp, SUCptspp, TREptspp
517	-54.8261	EX_succ_e	10.8056	-10	0.0694611	4	31.7019	-5.75177	27.0716	-3.75903	8.38941	b2415, b3732, b1489, b1380	2DGLCptspp, ACGAptspp, ACMANAptspp, ACMUMptspp, ARBTptspp, ASCBptspp, ATPS4rpp, CELBpts, CHTBSptspp, DHAPT, FRUpts2pp, FRUptspp, GALTptspp, GAMptspp, GLCptspp, LDH_D, MALTptspp, MANGLYCptspp, MANptspp, MNLptspp, PDE4, SBTptspp, SUCptspp, TREptspp
518	-54.8261	EX_succ_e	10.8056	-10	0.0694611	4	31.7019	-5.75177	27.0716	-3.75903	8.38941	b2415, b3736, b3927, b1380	2DGLCptspp, ACGAptspp, ACMANAptspp, ACMUMptspp, ARBTptspp, ASCBptspp, ATPS4rpp, CELBpts, CHTBSptspp, DHAPT, FRUpts2pp, FRUptspp, GALTptspp, GAMptspp, GLCptspp, GLYALDtpp, GLYtpp, LDH_D, MALTptspp, MANGLYCptspp, MANptspp, MNLptspp, SBTptspp, SUCptspp, TREptspp, UREAtpp
519	-54.8261	EX_succ_e	10.8056	-10	0.0694611	4	31.7019	-5.75177	27.0716	-3.75903	8.38941	b2415, b3732, b3927, b1380	2DGLCptspp, ACGAptspp, ACMANAptspp, ACMUMptspp, ARBTptspp, ASCBptspp, ATPS4rpp, CELBpts, CHTBSptspp, DHAPT, FRUpts2pp, FRUptspp, GALTptspp, GAMptspp, GLCptspp, GLYALDtpp, GLYtpp, LDH_D, MALTptspp, MANGLYCptspp, MANptspp, MNLptspp, SBTptspp, SUCptspp, TREptspp, UREAtpp
520	-54.8261	EX_succ_e	10.8056	-10	0.0694611	4	31.7019	-5.75177	27.0716	-3.75903	8.38941	b2415, b2440, b3732, b1380	2DGLCptspp, ACGAptspp, ACMANAptspp, ACMUMptspp, ARBTptspp, ASCBptspp, ATPS4rpp, CELBpts, CHTBSptspp, DHAPT, ETHAAL, FRUpts2pp, FRUptspp, GALTptspp, GAMptspp, GLCptspp, LDH_D, MALTptspp, MANGLYCptspp, MANptspp, MNLptspp, SBTptspp, SUCptspp, TREptspp
521	-54.8261	EX_succ_e	10.8056	-10	0.0694611	4	31.7019	-5.75177	27.0716	-3.75903	8.38941	b2415, b2441, b3732, b1380	2DGLCptspp, ACGAptspp, ACMANAptspp, ACMUMptspp, ARBTptspp, ASCBptspp, ATPS4rpp, CELBpts, CHTBSptspp, DHAPT, ETHAAL, FRUpts2pp, FRUptspp, GALTptspp, GAMptspp, GLCptspp, LDH_D, MALTptspp, MANGLYCptspp, MANptspp, MNLptspp, SBTptspp, SUCptspp, TREptspp
522	-54.8261	EX_succ_e	10.8056	-10	0.0694611	4	31.7019	-5.75177	27.0716	-3.75903	8.38941	b2415, b2440, b3736, b1380	2DGLCptspp, ACGAptspp, ACMANAptspp, ACMUMptspp, ARBTptspp, ASCBptspp, ATPS4rpp, CELBpts, CHTBSptspp, DHAPT, ETHAAL, FRUpts2pp, FRUptspp, GALTptspp, GAMptspp, GLCptspp, LDH_D, MALTptspp, MANGLYCptspp, MANptspp, MNLptspp, SBTptspp, SUCptspp, TREptspp
523	-54.8261	EX_succ_e	10.8056	-10	0.0694611	4	31.7019	-5.75177	27.0716	-3.75903	8.38941	b2415, b2441, b3736, b1380	2DGLCptspp, ACGAptspp, ACMANAptspp, ACMUMptspp, ARBTptspp, ASCBptspp, ATPS4rpp, CELBpts, CHTBSptspp, DHAPT, ETHAAL, FRUpts2pp, FRUptspp, GALTptspp, GAMptspp, GLCptspp, LDH_D, MALTptspp, MANGLYCptspp, MANptspp, MNLptspp, SBTptspp, SUCptspp, TREptspp
524	-54.8261	EX_succ_e	10.8056	-10	0.0694611	4	31.7019	-5.75177	27.0716	-3.75903	8.38941	b2415, b3736, b1380, b1473	2DGLCptspp, ACGAptspp, ACMANAptspp, ACMUMptspp, ARBTptspp, ASCBptspp, ATPS4rpp, CELBpts, CHTBSptspp, DHAPT, FRUpts2pp, FRUptspp, GALTptspp, GAMptspp, GLCptspp, LDH_D, MALTptspp, MANGLYCptspp, MANptspp, MNLptspp, PHEtipp, SBTptspp, SUCptspp, TREptspp, TRPtipp, TYRtipp
525	-54.8261	EX_succ_e	10.8056	-10	0.0694611	4	31.7019	-5.75177	27.0716	-3.75903	8.38941	b2415, b3732, b1380, b1473	2DGLCptspp, ACGAptspp, ACMANAptspp, ACMUMptspp, ARBTptspp, ASCBptspp, ATPS4rpp, CELBpts, CHTBSptspp, DHAPT, FRUpts2pp, FRUptspp, GALTptspp, GAMptspp, GLCptspp, LDH_D, MALTptspp, MANGLYCptspp, MANptspp, MNLptspp, PHEtipp, SBTptspp, SUCptspp, TREptspp, TRPtipp, TYRtipp
526	-54.8261	EX_succ_e	10.8056	-10	0.0694611	4	31.7019	-5.75177	27.0716	-3.75903	8.38941	b2415, b2265, b3732, b1380	2DGLCptspp, ACGAptspp, ACMANAptspp, ACMUMptspp, ARBTptspp, ASCBptspp, ATPS4rpp, CELBpts, CHTBSptspp, DHAPT, FRUpts2pp, FRUptspp, GALTptspp, GAMptspp, GLCptspp, ICHORS_copy2, LDH_D, MALTptspp, MANGLYCptspp, MANptspp, MNLptspp, SBTptspp, SUCptspp, TREptspp
527	-54.8261	EX_succ_e	10.8056	-10	0.0694611	4	31.7019	-5.75177	27.0716	-3.75903	8.38941	b2415, b2265, b3736, b1380	2DGLCptspp, ACGAptspp, ACMANAptspp, ACMUMptspp, ARBTptspp, ASCBptspp, ATPS4rpp, CELBpts, CHTBSptspp, DHAPT, FRUpts2pp, FRUptspp, GALTptspp, GAMptspp, GLCptspp, ICHORS_copy2, LDH_D, MALTptspp, MANGLYCptspp, MANptspp, MNLptspp, SBTptspp, SUCptspp, TREptspp
528	-54.8261	EX_succ_e	10.8056	-10	0.0694611	4	31.7019	-5.75177	27.0716	-3.75903	8.38941	b2415, b3732, b0511, b1380	2DGLCptspp, ACGAptspp, ACMANAptspp, ACMUMptspp, ALLTNt2rpp, ARBTptspp, ASCBptspp, ATPS4rpp, CELBpts, CHTBSptspp, DHAPT, FRUpts2pp, FRUptspp, GALTptspp, GAMptspp, GLCptspp, LDH_D, MALTptspp, MANGLYCptspp, MANptspp, MNLptspp, SBTptspp, SUCptspp, TREptspp
529	-54.8261	EX_succ_e	10.8056	-10	0.0694611	4	31.7019	-5.75177	27.0716	-3.75903	8.38941	b2415, b3736, b0511, b1380	2DGLCptspp, ACGAptspp, ACMANAptspp, ACMUMptspp, ALLTNt2rpp, ARBTptspp, ASCBptspp, ATPS4rpp, CELBpts, CHTBSptspp, DHAPT, FRUpts2pp, FRUptspp, GALTptspp, GAMptspp, GLCptspp, LDH_D, MALTptspp, MANGLYCptspp, MANptspp, MNLptspp, SBTptspp, SUCptspp, TREptspp
530	-54.8261	EX_succ_e	10.8056	-10	0.0694611	4	31.7019	-5.75177	27.0716	-3.75903	8.38941	b4468, b2415, b3732, b1380	2DGLCptspp, ACGAptspp, ACMANAptspp, ACMUMptspp, ARBTptspp, ASCBptspp, ATPS4rpp, CELBpts, CHTBSptspp, DHAPT, FRUpts2pp, FRUptspp, GALTptspp, GAMptspp, GLCptspp, GLYCTO2, GLYCTO3, GLYCTO4, LDH_D, MALTptspp, MANGLYCptspp, MANptspp, MNLptspp, SBTptspp, SUCptspp, TREptspp
531	-54.8261	EX_succ_e	10.8056	-10	0.0694611	4	31.7019	-5.75177	27.0716	-3.75903	8.38941	b2979, b2415, b3732, b1380	2DGLCptspp, ACGAptspp, ACMANAptspp, ACMUMptspp, ARBTptspp, ASCBptspp, ATPS4rpp, CELBpts, CHTBSptspp, DHAPT, FRUpts2pp, FRUptspp, GALTptspp, GAMptspp, GLCptspp, GLYCTO2, GLYCTO3, GLYCTO4, LDH_D, MALTptspp, MANGLYCptspp, MANptspp, MNLptspp, SBTptspp, SUCptspp, TREptspp
532	-54.8261	EX_succ_e	10.8056	-10	0.0694611	4	31.7019	-5.75177	27.0716	-3.75903	8.38941	b2979, b2415, b3736, b1380	2DGLCptspp, ACGAptspp, ACMANAptspp, ACMUMptspp, ARBTptspp, ASCBptspp, ATPS4rpp, CELBpts, CHTBSptspp, DHAPT, FRUpts2pp, FRUptspp, GALTptspp, GAMptspp, GLCptspp, GLYCTO2, GLYCTO3, GLYCTO4, LDH_D, MALTptspp, MANGLYCptspp, MANptspp, MNLptspp, SBTptspp, SUCptspp, TREptspp
533	-54.8261	EX_succ_e	10.8056	-10	0.0694611	4	31.7019	-5.75177	27.0716	-3.75903	8.38941	b4467, b2415, b3736, b1380	2DGLCptspp, ACGAptspp, ACMANAptspp, ACMUMptspp, ARBTptspp, ASCBptspp, ATPS4rpp, CELBpts, CHTBSptspp, DHAPT, FRUpts2pp, FRUptspp, GALTptspp, GAMptspp, GLCptspp, GLYCTO2, GLYCTO3, GLYCTO4, LDH_D, MALTptspp, MANGLYCptspp, MANptspp, MNLptspp, SBTptspp, SUCptspp, TREptspp
534	-54.8261	EX_succ_e	10.8056	-10	0.0694611	4	31.7019	-5.75177	27.0716	-3.75903	8.38941	b2415, b2675, b3736, b1380	2DGLCptspp, ACGAptspp, ACMANAptspp, ACMUMptspp, ARBTptspp, ASCBptspp, ATPS4rpp, CELBpts, CHTBSptspp, DHAPT, FRUpts2pp, FRUptspp, GALTptspp, GAMptspp, GLCptspp, LDH_D, MALTptspp, MANGLYCptspp, MANptspp, MNLptspp, RNDR1b, RNDR2b, RNDR3b, RNDR4b, SBTptspp, SUCptspp, TREptspp
535	-54.8261	EX_succ_e	10.8056	-10	0.0694611	4	31.7019	-5.75177	27.0716	-3.75903	8.38941	b2415, b2676, b3732, b1380	2DGLCptspp, ACGAptspp, ACMANAptspp, ACMUMptspp, ARBTptspp, ASCBptspp, ATPS4rpp, CELBpts, CHTBSptspp, DHAPT, FRUpts2pp, FRUptspp, GALTptspp, GAMptspp, GLCptspp, LDH_D, MALTptspp, MANGLYCptspp, MANptspp, MNLptspp, RNDR1b, RNDR2b, RNDR3b, RNDR4b, SBTptspp, SUCptspp, TREptspp
536	-54.8261	EX_succ_e	10.8056	-10	0.0694611	4	31.7019	-5.75177	27.0716	-3.75903	8.38941	b2415, b2676, b3736, b1380	2DGLCptspp, ACGAptspp, ACMANAptspp, ACMUMptspp, ARBTptspp, ASCBptspp, ATPS4rpp, CELBpts, CHTBSptspp, DHAPT, FRUpts2pp, FRUptspp, GALTptspp, GAMptspp, GLCptspp, LDH_D, MALTptspp, MANGLYCptspp, MANptspp, MNLptspp, RNDR1b, RNDR2b, RNDR3b, RNDR4b, SBTptspp, SUCptspp, TREptspp
537	-54.8261	EX_succ_e	10.8056	-10	0.0694611	4	31.7019	-5.75177	27.0716	-3.75903	8.38941	b2415, b3732, b2889, b1380	2DGLCptspp, ACGAptspp, ACMANAptspp, ACMUMptspp, ARBTptspp, ASCBptspp, ATPS4rpp, CELBpts, CHTBSptspp, DHAPT, FRUpts2pp, FRUptspp, GALTptspp, GAMptspp, GLCptspp, IPDDI, LDH_D, MALTptspp, MANGLYCptspp, MANptspp, MNLptspp, SBTptspp, SUCptspp, TREptspp
538	-54.8261	EX_succ_e	10.8056	-10	0.0694611	4	31.7019	-5.75177	27.0716	-3.75903	8.38941	b2415, b3736, b2889, b1380	2DGLCptspp, ACGAptspp, ACMANAptspp, ACMUMptspp, ARBTptspp, ASCBptspp, ATPS4rpp, CELBpts, CHTBSptspp, DHAPT, FRUpts2pp, FRUptspp, GALTptspp, GAMptspp, GLCptspp, IPDDI, LDH_D, MALTptspp, MANGLYCptspp, MANptspp, MNLptspp, SBTptspp, SUCptspp, TREptspp
539	-54.8261	EX_succ_e	10.8056	-10	0.0694611	4	31.7019	-5.75177	27.0716	-3.75903	8.38941	b2415, b3732, b1380, b1821	2DGLCptspp, ACGAptspp, ACMANAptspp, ACMUMptspp, ARBTptspp, ASCBptspp, ATPS4rpp, CELBpts, CHTBSptspp, DHAPT, FRUpts2pp, FRUptspp, GALTptspp, GAMptspp, GLCptspp, LDH_D, MALTptspp, MANGLYCptspp, MANptspp, MN2tipp, MNLptspp, SBTptspp, SUCptspp, TREptspp
540	-54.8261	EX_succ_e	10.8056	-10	0.0694611	4	31.7019	-5.75177	27.0716	-3.75903	8.38941	b2415, b3736, b1380, b1821	2DGLCptspp, ACGAptspp, ACMANAptspp, ACMUMptspp, ARBTptspp, ASCBptspp, ATPS4rpp, CELBpts, CHTBSptspp, DHAPT, FRUpts2pp, FRUptspp, GALTptspp, GAMptspp, GLCptspp, LDH_D, MALTptspp, MANGLYCptspp, MANptspp, MN2tipp, MNLptspp, SBTptspp, SUCptspp, TREptspp
541	-54.8261	EX_succ_e	10.8056	-10	0.0694611	4	31.7019	-5.75177	27.0716	-3.75903	8.38941	b3403, b2415, b3732, b1380	2DGLCptspp, ACGAptspp, ACMANAptspp, ACMUMptspp, ARBTptspp, ASCBptspp, ATPS4rpp, CELBpts, CHTBSptspp, DHAPT, FRUpts2pp, FRUptspp, GALTptspp, GAMptspp, GLCptspp, LDH_D, MALTptspp, MANGLYCptspp, MANptspp, MNLptspp, PPCK, SBTptspp, SUCptspp, TREptspp
542	-54.8261	EX_succ_e	10.8056	-10	0.0694611	4	31.7019	-5.75177	27.0716	-3.75903	8.38941	b3403, b2415, b3736, b1380	2DGLCptspp, ACGAptspp, ACMANAptspp, ACMUMptspp, ARBTptspp, ASCBptspp, ATPS4rpp, CELBpts, CHTBSptspp, DHAPT, FRUpts2pp, FRUptspp, GALTptspp, GAMptspp, GLCptspp, LDH_D, MALTptspp, MANGLYCptspp, MANptspp, MNLptspp, PPCK, SBTptspp, SUCptspp, TREptspp
543	-54.8261	EX_succ_e	10.8056	-10	0.0694611	4	31.7019	-5.75177	27.0716	-3.75903	8.38941	b3115, b2415, b3732, b1380	2DGLCptspp, ACGAptspp, ACMANAptspp, ACMUMptspp, ARBTptspp, ASCBptspp, ATPS4rpp, CELBpts, CHTBSptspp, DHAPT, FRUpts2pp, FRUptspp, GALTptspp, GAMptspp, GLCptspp, LDH_D, MALTptspp, MANGLYCptspp, MANptspp, MNLptspp, PPAKr, SBTptspp, SUCptspp, TREptspp
544	-54.8261	EX_succ_e	10.8056	-10	0.0694611	4	31.7019	-5.75177	27.0716	-3.75903	8.38941	b2297, b2415, b3732, b1380	2DGLCptspp, ACGAptspp, ACMANAptspp, ACMUMptspp, ARBTptspp, ASCBptspp, ATPS4rpp, CELBpts, CHTBSptspp, DHAPT, FRUpts2pp, FRUptspp, GALTptspp, GAMptspp, GLCptspp, LDH_D, MALTptspp, MANGLYCptspp, MANptspp, MNLptspp, PTA2, SBTptspp, SUCptspp, TREptspp
545	-54.8261	EX_succ_e	10.8056	-10	0.0694611	4	31.7019	-5.75177	27.0716	-3.75903	8.38941	b3115, b2415, b3736, b1380	2DGLCptspp, ACGAptspp, ACMANAptspp, ACMUMptspp, ARBTptspp, ASCBptspp, ATPS4rpp, CELBpts, CHTBSptspp, DHAPT, FRUpts2pp, FRUptspp, GALTptspp, GAMptspp, GLCptspp, LDH_D, MALTptspp, MANGLYCptspp, MANptspp, MNLptspp, PPAKr, SBTptspp, SUCptspp, TREptspp
546	-54.8261	EX_succ_e	10.8056	-10	0.0694611	4	31.7019	-5.75177	27.0716	-3.75903	8.38941	b2415, b2048, b3732, b1380	2DGLCptspp, ACGAptspp, ACMANAptspp, ACMUMptspp, ARBTptspp, ASCBptspp, ATPS4rpp, CELBpts, CHTBSptspp, DHAPT, FRUpts2pp, FRUptspp, GALTptspp, GAMptspp, GLCptspp, LDH_D, MALTptspp, MANGLYCptspp, MANptspp, MNLptspp, PMANM, SBTptspp, SUCptspp, TREptspp
547	-54.8261	EX_succ_e	10.8056	-10	0.0694611	4	31.7019	-5.75177	27.0716	-3.75903	8.38941	b2415, b2048, b3736, b1380	2DGLCptspp, ACGAptspp, ACMANAptspp, ACMUMptspp, ARBTptspp, ASCBptspp, ATPS4rpp, CELBpts, CHTBSptspp, DHAPT, FRUpts2pp, FRUptspp, GALTptspp, GAMptspp, GLCptspp, LDH_D, MALTptspp, MANGLYCptspp, MANptspp, MNLptspp, PMANM, SBTptspp, SUCptspp, TREptspp
548	-54.8261	EX_succ_e	10.8056	-10	0.0694611	4	31.7019	-5.75177	27.0716	-3.75903	8.38941	b2415, b3732, b3432, b1380	2DGLCptspp, ACGAptspp, ACMANAptspp, ACMUMptspp, ARBTptspp, ASCBptspp, ATPS4rpp, CELBpts, CHTBSptspp, DHAPT, FRUpts2pp, FRUptspp, GALTptspp, GAMptspp, GLBRAN2, GLCptspp, LDH_D, MALTptspp, MANGLYCptspp, MANptspp, MNLptspp, SBTptspp, SUCptspp, TREptspp
549	-54.8261	EX_succ_e	10.8056	-10	0.0694611	4	31.7019	-5.75177	27.0716	-3.75903	8.38941	b2415, b3736, b3432, b1380	2DGLCptspp, ACGAptspp, ACMANAptspp, ACMUMptspp, ARBTptspp, ASCBptspp, ATPS4rpp, CELBpts, CHTBSptspp, DHAPT, FRUpts2pp, FRUptspp, GALTptspp, GAMptspp, GLBRAN2, GLCptspp, LDH_D, MALTptspp, MANGLYCptspp, MANptspp, MNLptspp, SBTptspp, SUCptspp, TREptspp
550	-54.8261	EX_succ_e	10.8056	-10	0.0694611	4	31.7019	-5.75177	27.0716	-3.75903	8.38941	b4025, b2415, b3736, b1380	2DGLCptspp, ACGAptspp, ACMANAptspp, ACMUMptspp, ARBTptspp, ASCBptspp, ATPS4rpp, CELBpts, CHTBSptspp, DHAPT, FRUpts2pp, FRUptspp, GALTptspp, GAMptspp, GLCptspp, LDH_D, MALTptspp, MANGLYCptspp, MANptspp, MNLptspp, PGI, SBTptspp, SUCptspp, TREptspp
551	-54.8261	EX_succ_e	10.8056	-10	0.0694611	4	31.7019	-5.75177	27.0716	-3.75903	8.38941	b4025, b2415, b3732, b1380	2DGLCptspp, ACGAptspp, ACMANAptspp, ACMUMptspp, ARBTptspp, ASCBptspp, ATPS4rpp, CELBpts, CHTBSptspp, DHAPT, FRUpts2pp, FRUptspp, GALTptspp, GAMptspp, GLCptspp, LDH_D, MALTptspp, MANGLYCptspp, MANptspp, MNLptspp, PGI, SBTptspp, SUCptspp, TREptspp
552	-54.8261	EX_succ_e	10.8056	-10	0.0694611	4	31.7019	-5.75177	27.0716	-3.75903	8.38941	b2415, b3732, b1380, b4042	2DGLCptspp, ACGAptspp, ACMANAptspp, ACMUMptspp, ARBTptspp, ASCBptspp, ATPS4rpp, CELBpts, CHTBSptspp, DAGK120, DAGK140, DAGK141, DAGK160, DAGK161, DAGK180, DAGK181, DHAPT, FRUpts2pp, FRUptspp, GALTptspp, GAMptspp, GLCptspp, LDH_D, MALTptspp, MANGLYCptspp, MANptspp, MNLptspp, SBTptspp, SUCptspp, TREptspp
553	-54.8261	EX_succ_e	10.8056	-10	0.0694611	4	31.7019	-5.75177	27.0716	-3.75903	8.38941	b2415, b3736, b1380, b4042	2DGLCptspp, ACGAptspp, ACMANAptspp, ACMUMptspp, ARBTptspp, ASCBptspp, ATPS4rpp, CELBpts, CHTBSptspp, DAGK120, DAGK140, DAGK141, DAGK160, DAGK161, DAGK180, DAGK181, DHAPT, FRUpts2pp, FRUptspp, GALTptspp, GAMptspp, GLCptspp, LDH_D, MALTptspp, MANGLYCptspp, MANptspp, MNLptspp, SBTptspp, SUCptspp, TREptspp
554	-54.8261	EX_succ_e	10.8056	-10	0.0694611	4	31.7019	-5.75177	27.0716	-3.75903	8.38941	b2415, b3732, b1380, b1336	2DGLCptspp, 4ABZGLUtr, ACGAptspp, ACMANAptspp, ACMUMptspp, ARBTptspp, ASCBptspp, ATPS4rpp, CELBpts, CHTBSptspp, DHAPT, FRUpts2pp, FRUptspp, GALTptspp, GAMptspp, GLCptspp, LDH_D, MALTptspp, MANGLYCptspp, MANptspp, MNLptspp, SBTptspp, SUCptspp, TREptspp
555	-54.8261	EX_succ_e	10.8056	-10	0.0694611	4	31.7019	-5.75177	27.0716	-3.75903	8.38941	b2415, b3732, b1380, b1337	2DGLCptspp, 4ABZGLUH, ACGAptspp, ACMANAptspp, ACMUMptspp, ARBTptspp, ASCBptspp, ATPS4rpp, CELBpts, CHTBSptspp, DHAPT, FRUpts2pp, FRUptspp, GALTptspp, GAMptspp, GLCptspp, LDH_D, MALTptspp, MANGLYCptspp, MANptspp, MNLptspp, SBTptspp, SUCptspp, TREptspp
556	-54.8261	EX_succ_e	10.8056	-10	0.0694611	4	31.7019	-5.75177	27.0716	-3.75903	8.38941	b2415, b3736, b1380, b1336	2DGLCptspp, 4ABZGLUtr, ACGAptspp, ACMANAptspp, ACMUMptspp, ARBTptspp, ASCBptspp, ATPS4rpp, CELBpts, CHTBSptspp, DHAPT, FRUpts2pp, FRUptspp, GALTptspp, GAMptspp, GLCptspp, LDH_D, MALTptspp, MANGLYCptspp, MANptspp, MNLptspp, SBTptspp, SUCptspp, TREptspp
557	-54.8261	EX_succ_e	10.8056	-10	0.0694611	4	31.7019	-5.75177	27.0716	-3.75903	8.38941	b2415, b3732, b1380, b1338	2DGLCptspp, 4ABZGLUH, ACGAptspp, ACMANAptspp, ACMUMptspp, ARBTptspp, ASCBptspp, ATPS4rpp, CELBpts, CHTBSptspp, DHAPT, FRUpts2pp, FRUptspp, GALTptspp, GAMptspp, GLCptspp, LDH_D, MALTptspp, MANGLYCptspp, MANptspp, MNLptspp, SBTptspp, SUCptspp, TREptspp
558	-54.8261	EX_succ_e	10.8056	-10	0.0694611	4	31.7019	-5.75177	27.0716	-3.75903	8.38941	b2415, b3736, b1380, b1337	2DGLCptspp, 4ABZGLUH, ACGAptspp, ACMANAptspp, ACMUMptspp, ARBTptspp, ASCBptspp, ATPS4rpp, CELBpts, CHTBSptspp, DHAPT, FRUpts2pp, FRUptspp, GALTptspp, GAMptspp, GLCptspp, LDH_D, MALTptspp, MANGLYCptspp, MANptspp, MNLptspp, SBTptspp, SUCptspp, TREptspp
559	-54.8261	EX_succ_e	10.8056	-10	0.0694611	4	31.7019	-5.75177	27.0716	-3.75903	8.38941	b2415, b3736, b1380, b1338	2DGLCptspp, 4ABZGLUH, ACGAptspp, ACMANAptspp, ACMUMptspp, ARBTptspp, ASCBptspp, ATPS4rpp, CELBpts, CHTBSptspp, DHAPT, FRUpts2pp, FRUptspp, GALTptspp, GAMptspp, GLCptspp, LDH_D, MALTptspp, MANGLYCptspp, MANptspp, MNLptspp, SBTptspp, SUCptspp, TREptspp
560	-54.8261	EX_succ_e	10.8056	-10	0.0694611	4	31.7019	-5.75177	27.0716	-3.75903	8.38941	b2415, b3732, b1380, b1592	2DGLCptspp, ACGAptspp, ACMANAptspp, ACMUMptspp, ARBTptspp, ASCBptspp, ATPS4rpp, CELBpts, CHTBSptspp, CLtipp, DHAPT, FRUpts2pp, FRUptspp, GALTptspp, GAMptspp, GLCptspp, LDH_D, MALTptspp, MANGLYCptspp, MANptspp, MNLptspp, SBTptspp, SUCptspp, TREptspp
561	-54.8261	EX_succ_e	10.8056	-10	0.0694611	4	31.7019	-5.75177	27.0716	-3.75903	8.38941	b2415, b3736, b1380, b1592	2DGLCptspp, ACGAptspp, ACMANAptspp, ACMUMptspp, ARBTptspp, ASCBptspp, ATPS4rpp, CELBpts, CHTBSptspp, CLtipp, DHAPT, FRUpts2pp, FRUptspp, GALTptspp, GAMptspp, GLCptspp, LDH_D, MALTptspp, MANGLYCptspp, MANptspp, MNLptspp, SBTptspp, SUCptspp, TREptspp
562	-54.8261	EX_succ_e	10.8056	-10	0.0694611	4	31.7019	-5.75177	27.0716	-3.75903	8.38941	b3430, b2415, b3736, b1380	2DGLCptspp, ACGAptspp, ACMANAptspp, ACMUMptspp, ARBTptspp, ASCBptspp, ATPS4rpp, CELBpts, CHTBSptspp, DHAPT, FRUpts2pp, FRUptspp, GALTptspp, GAMptspp, GLCptspp, GLGC, LDH_D, MALTptspp, MANGLYCptspp, MANptspp, MNLptspp, SBTptspp, SUCptspp, TREptspp
563	-54.8261	EX_succ_e	10.8056	-10	0.0694611	4	31.7019	-5.75177	27.0716	-3.75903	8.38941	b3429, b2415, b3732, b1380	2DGLCptspp, ACGAptspp, ACMANAptspp, ACMUMptspp, ARBTptspp, ASCBptspp, ATPS4rpp, CELBpts, CHTBSptspp, DHAPT, FRUpts2pp, FRUptspp, GALTptspp, GAMptspp, GLCS1, GLCptspp, LDH_D, MALTptspp, MANGLYCptspp, MANptspp, MNLptspp, SBTptspp, SUCptspp, TREptspp
564	-54.8261	EX_succ_e	10.8056	-10	0.0694611	4	31.7019	-5.75177	27.0716	-3.75903	8.38941	b3429, b2415, b3736, b1380	2DGLCptspp, ACGAptspp, ACMANAptspp, ACMUMptspp, ARBTptspp, ASCBptspp, ATPS4rpp, CELBpts, CHTBSptspp, DHAPT, FRUpts2pp, FRUptspp, GALTptspp, GAMptspp, GLCS1, GLCptspp, LDH_D, MALTptspp, MANGLYCptspp, MANptspp, MNLptspp, SBTptspp, SUCptspp, TREptspp
565	-54.8261	EX_succ_e	10.8056	-10	0.0694611	4	31.7019	-5.75177	27.0716	-3.75903	8.38941	b3430, b2415, b3732, b1380	2DGLCptspp, ACGAptspp, ACMANAptspp, ACMUMptspp, ARBTptspp, ASCBptspp, ATPS4rpp, CELBpts, CHTBSptspp, DHAPT, FRUpts2pp, FRUptspp, GALTptspp, GAMptspp, GLCptspp, GLGC, LDH_D, MALTptspp, MANGLYCptspp, MANptspp, MNLptspp, SBTptspp, SUCptspp, TREptspp
566	-54.8261	EX_succ_e	10.8056	-10	0.0694611	4	31.7019	-5.75177	27.0716	-3.75903	8.38941	b2415, b3736, b2051, b1380	2DGLCptspp, ACGAptspp, ACMANAptspp, ACMUMptspp, ARBTptspp, ASCBptspp, ATPS4rpp, CELBpts, CHTBSptspp, DHAPT, FRUpts2pp, FRUptspp, GALTptspp, GAMptspp, GDPMNH, GLCptspp, LDH_D, MALTptspp, MANGLYCptspp, MANptspp, MNLptspp, SBTptspp, SUCptspp, TREptspp
567	-54.8261	EX_succ_e	10.8056	-10	0.0694611	4	31.7019	-5.75177	27.0716	-3.75903	8.38941	b2415, b3732, b2051, b1380	2DGLCptspp, ACGAptspp, ACMANAptspp, ACMUMptspp, ARBTptspp, ASCBptspp, ATPS4rpp, CELBpts, CHTBSptspp, DHAPT, FRUpts2pp, FRUptspp, GALTptspp, GAMptspp, GDPMNH, GLCptspp, LDH_D, MALTptspp, MANGLYCptspp, MANptspp, MNLptspp, SBTptspp, SUCptspp, TREptspp
568	-54.8261	EX_succ_e	10.8056	-10	0.0694611	4	31.7019	-5.75177	27.0716	-3.75903	8.38941	b2415, b3732, b0931, b1380	2DGLCptspp, ACGAptspp, ACMANAptspp, ACMUMptspp, ARBTptspp, ASCBptspp, ATPS4rpp, CELBpts, CHTBSptspp, DHAPT, FRUpts2pp, FRUptspp, GALTptspp, GAMptspp, GLCptspp, LDH_D, MALTptspp, MANGLYCptspp, MANptspp, MNLptspp, NAMNPP, SBTptspp, SUCptspp, TREptspp
569	-54.8261	EX_succ_e	10.8056	-10	0.0694611	4	31.7019	-5.75177	27.0716	-3.75903	8.38941	b2415, b3736, b0931, b1380	2DGLCptspp, ACGAptspp, ACMANAptspp, ACMUMptspp, ARBTptspp, ASCBptspp, ATPS4rpp, CELBpts, CHTBSptspp, DHAPT, FRUpts2pp, FRUptspp, GALTptspp, GAMptspp, GLCptspp, LDH_D, MALTptspp, MANGLYCptspp, MANptspp, MNLptspp, NAMNPP, SBTptspp, SUCptspp, TREptspp
570	-54.8261	EX_succ_e	10.8056	-10	0.0694611	4	31.7019	-5.75177	27.0716	-3.75903	8.38941	b2415, b1768, b3732, b1380	2DGLCptspp, ACGAptspp, ACMANAptspp, ACMUMptspp, ARBTptspp, ASCBptspp, ATPS4rpp, CELBpts, CHTBSptspp, DHAPT, FRUpts2pp, FRUptspp, GALTptspp, GAMptspp, GLCptspp, LDH_D, MALTptspp, MANGLYCptspp, MANptspp, MNLptspp, NNAM, SBTptspp, SUCptspp, TREptspp
571	-54.8261	EX_succ_e	10.8056	-10	0.0694611	4	31.7019	-5.75177	27.0716	-3.75903	8.38941	b2415, b1768, b3736, b1380	2DGLCptspp, ACGAptspp, ACMANAptspp, ACMUMptspp, ARBTptspp, ASCBptspp, ATPS4rpp, CELBpts, CHTBSptspp, DHAPT, FRUpts2pp, FRUptspp, GALTptspp, GAMptspp, GLCptspp, LDH_D, MALTptspp, MANGLYCptspp, MANptspp, MNLptspp, NNAM, SBTptspp, SUCptspp, TREptspp
572	-54.8261	EX_succ_e	10.8056	-10	0.0694611	4	31.7019	-5.75177	27.0716	-3.75903	8.38941	b2415, b0766, b3732, b1380	2DGLCptspp, ACGAptspp, ACMANAptspp, ACMUMptspp, ARBTptspp, ASCBptspp, ATPS4rpp, CELBpts, CHTBSptspp, DHAPT, FRUpts2pp, FRUptspp, GALTptspp, GAMptspp, GLCptspp, LDH_D, MALTptspp, MANGLYCptspp, MANptspp, MNLptspp, PDXPP, SBTptspp, SUCptspp, TREptspp
573	-54.8261	EX_succ_e	10.8056	-10	0.0694611	4	31.7019	-5.75177	27.0716	-3.75903	8.38941	b2415, b0766, b3736, b1380	2DGLCptspp, ACGAptspp, ACMANAptspp, ACMUMptspp, ARBTptspp, ASCBptspp, ATPS4rpp, CELBpts, CHTBSptspp, DHAPT, FRUpts2pp, FRUptspp, GALTptspp, GAMptspp, GLCptspp, LDH_D, MALTptspp, MANGLYCptspp, MANptspp, MNLptspp, PDXPP, SBTptspp, SUCptspp, TREptspp
574	-54.8261	EX_succ_e	10.8056	-10	0.0694611	4	31.7019	-5.75177	27.0716	-3.75903	8.38941	b2415, b3736, b1380, b1710	2DGLCptspp, ACGAptspp, ACMANAptspp, ACMUMptspp, ARBTptspp, ASCBptspp, ATPS4rpp, CELBpts, CHTBSptspp, DHAPT, FRUpts2pp, FRUptspp, GALTptspp, GAMptspp, GLCptspp, GTHPi, LDH_D, MALTptspp, MANGLYCptspp, MANptspp, MNLptspp, SBTptspp, SUCptspp, TREptspp
575	-54.8261	EX_succ_e	10.8056	-10	0.0694611	4	31.7019	-5.75177	27.0716	-3.75903	8.38941	b2415, b1014, b3732, b1380	2DGLCptspp, ACGAptspp, ACMANAptspp, ACMUMptspp, ARBTptspp, ASCBptspp, ATPS4rpp, CELBpts, CHTBSptspp, DHAPT, FRUpts2pp, FRUptspp, GALTptspp, GAMptspp, GLCptspp, LDH_D, MALTptspp, MANGLYCptspp, MANptspp, MNLptspp, P5CD, PROD3, SBTptspp, SUCptspp, TREptspp
576	-54.8261	EX_succ_e	10.8056	-10	0.0694611	4	31.7019	-5.75177	27.0716	-3.75903	8.38941	b2415, b1014, b3736, b1380	2DGLCptspp, ACGAptspp, ACMANAptspp, ACMUMptspp, ARBTptspp, ASCBptspp, ATPS4rpp, CELBpts, CHTBSptspp, DHAPT, FRUpts2pp, FRUptspp, GALTptspp, GAMptspp, GLCptspp, LDH_D, MALTptspp, MANGLYCptspp, MANptspp, MNLptspp, P5CD, PROD3, SBTptspp, SUCptspp, TREptspp
577	-54.8261	EX_succ_e	10.8056	-10	0.0694611	4	31.7019	-5.75177	27.0716	-3.75903	8.38941	b2415, b3738, b1444, b1380	2DGLCptspp, ABUTD, ACGAptspp, ACMANAptspp, ACMUMptspp, ARBTptspp, ASCBptspp, ATPS4rpp, CELBpts, CHTBSptspp, DHAPT, FRUpts2pp, FRUptspp, GALTptspp, GAMptspp, GLCptspp, LDH_D, MALTptspp, MANGLYCptspp, MANptspp, MNLptspp, SBTptspp, SUCptspp, TREptspp
578	-54.8261	EX_succ_e	10.8056	-10	0.0694611	4	31.7019	-5.75177	27.0716	-3.75903	8.38941	b2415, b3732, b1444, b1380	2DGLCptspp, ABUTD, ACGAptspp, ACMANAptspp, ACMUMptspp, ARBTptspp, ASCBptspp, ATPS4rpp, CELBpts, CHTBSptspp, DHAPT, FRUpts2pp, FRUptspp, GALTptspp, GAMptspp, GLCptspp, LDH_D, MALTptspp, MANGLYCptspp, MANptspp, MNLptspp, SBTptspp, SUCptspp, TREptspp
579	-54.8261	EX_succ_e	10.8056	-10	0.0694611	4	31.7019	-5.75177	27.0716	-3.75903	8.38941	b2415, b3736, b1444, b1380	2DGLCptspp, ABUTD, ACGAptspp, ACMANAptspp, ACMUMptspp, ARBTptspp, ASCBptspp, ATPS4rpp, CELBpts, CHTBSptspp, DHAPT, FRUpts2pp, FRUptspp, GALTptspp, GAMptspp, GLCptspp, LDH_D, MALTptspp, MANGLYCptspp, MANptspp, MNLptspp, SBTptspp, SUCptspp, TREptspp
580	-54.8261	EX_succ_e	10.8056	-10	0.0694611	4	31.7019	-5.75177	27.0716	-3.75903	8.38941	b3073, b2415, b3732, b1380	2DGLCptspp, ACGAptspp, ACMANAptspp, ACMUMptspp, ARBTptspp, ASCBptspp, ATPS4rpp, CELBpts, CHTBSptspp, DHAPT, FRUpts2pp, FRUptspp, GALTptspp, GAMptspp, GLCptspp, LDH_D, MALTptspp, MANGLYCptspp, MANptspp, MNLptspp, PTRCTA, SBTptspp, SUCptspp, TREptspp
581	-54.8261	EX_succ_e	10.8056	-10	0.0694611	4	31.7019	-5.75177	27.0716	-3.75903	8.38941	b3073, b2415, b3736, b1380	2DGLCptspp, ACGAptspp, ACMANAptspp, ACMUMptspp, ARBTptspp, ASCBptspp, ATPS4rpp, CELBpts, CHTBSptspp, DHAPT, FRUpts2pp, FRUptspp, GALTptspp, GAMptspp, GLCptspp, LDH_D, MALTptspp, MANGLYCptspp, MANptspp, MNLptspp, PTRCTA, SBTptspp, SUCptspp, TREptspp
582	-54.8261	EX_succ_e	10.8056	-10	0.0694611	4	31.7019	-5.75177	27.0716	-3.75903	8.38941	b2415, b3736, b0692, b1380	2DGLCptspp, ACGAptspp, ACMANAptspp, ACMUMptspp, ARBTptspp, ASCBptspp, ATPS4rpp, CELBpts, CHTBSptspp, DHAPT, FRUpts2pp, FRUptspp, GALTptspp, GAMptspp, GLCptspp, LDH_D, MALTptspp, MANGLYCptspp, MANptspp, MNLptspp, PTRCORNt7pp, SBTptspp, SUCptspp, TREptspp
583	-54.8261	EX_succ_e	10.8056	-10	0.0694611	4	31.7019	-5.75177	27.0716	-3.75903	8.38941	b0477, b2415, b3732, b1380	2DGLCptspp, ACGAptspp, ACMANAptspp, ACMUMptspp, ARBTptspp, ASCBptspp, ATPS4rpp, CELBpts, CHTBSptspp, DHAPT, FRUpts2pp, FRUptspp, GALTptspp, GAMptspp, GLCptspp, GSNK, INSK, LDH_D, MALTptspp, MANGLYCptspp, MANptspp, MNLptspp, SBTptspp, SUCptspp, TREptspp
584	-54.8261	EX_succ_e	10.8056	-10	0.0694611	4	31.7019	-5.75177	27.0716	-3.75903	8.38941	b0477, b2415, b3736, b1380	2DGLCptspp, ACGAptspp, ACMANAptspp, ACMUMptspp, ARBTptspp, ASCBptspp, ATPS4rpp, CELBpts, CHTBSptspp, DHAPT, FRUpts2pp, FRUptspp, GALTptspp, GAMptspp, GLCptspp, GSNK, INSK, LDH_D, MALTptspp, MANGLYCptspp, MANptspp, MNLptspp, SBTptspp, SUCptspp, TREptspp
585	-54.8261	EX_succ_e	10.8056	-10	0.0694611	4	31.7019	-5.75177	27.0716	-3.75903	8.38941	b2415, b3732, b2392, b1380	2DGLCptspp, ACGAptspp, ACMANAptspp, ACMUMptspp, ARBTptspp, ASCBptspp, ATPS4rpp, CELBpts, CHTBSptspp, DHAPT, FE2t2pp, FRUpts2pp, FRUptspp, GALTptspp, GAMptspp, GLCptspp, LDH_D, MALTptspp, MANGLYCptspp, MANptspp, MNLptspp, MNt2pp, SBTptspp, SUCptspp, TREptspp
586	-54.8261	EX_succ_e	10.8056	-10	0.0694611	4	31.7019	-5.75177	27.0716	-3.75903	8.38941	b2415, b3736, b2392, b1380	2DGLCptspp, ACGAptspp, ACMANAptspp, ACMUMptspp, ARBTptspp, ASCBptspp, ATPS4rpp, CELBpts, CHTBSptspp, DHAPT, FE2t2pp, FRUpts2pp, FRUptspp, GALTptspp, GAMptspp, GLCptspp, LDH_D, MALTptspp, MANGLYCptspp, MANptspp, MNLptspp, MNt2pp, SBTptspp, SUCptspp, TREptspp
587	-54.8261	EX_succ_e	10.8056	-10	0.0694611	4	31.7019	-5.75177	27.0716	-3.75903	8.38941	b1278, b2415, b3732, b1380	2DGLCptspp, ACGAptspp, ACMANAptspp, ACMUMptspp, ARBTptspp, ASCBptspp, ATPS4rpp, CELBpts, CHTBSptspp, DHAPT, FRUpts2pp, FRUptspp, GALTptspp, GAMptspp, GLCptspp, LDH_D, MALTptspp, MANGLYCptspp, MANptspp, MNLptspp, PAPA120, PAPA120pp, PAPA140, PAPA140pp, PAPA141, PAPA141pp, PAPA160, PAPA160pp, PAPA161, PAPA161pp, PAPA180, PAPA180pp, PAPA181, PAPA181pp, SBTptspp, SUCptspp, TREptspp
588	-54.8261	EX_succ_e	10.8056	-10	0.0694611	4	31.7019	-5.75177	27.0716	-3.75903	8.38941	b1278, b2415, b3736, b1380	2DGLCptspp, ACGAptspp, ACMANAptspp, ACMUMptspp, ARBTptspp, ASCBptspp, ATPS4rpp, CELBpts, CHTBSptspp, DHAPT, FRUpts2pp, FRUptspp, GALTptspp, GAMptspp, GLCptspp, LDH_D, MALTptspp, MANGLYCptspp, MANptspp, MNLptspp, PAPA120, PAPA120pp, PAPA140, PAPA140pp, PAPA141, PAPA141pp, PAPA160, PAPA160pp, PAPA161, PAPA161pp, PAPA180, PAPA180pp, PAPA181, PAPA181pp, SBTptspp, SUCptspp, TREptspp
589	-54.8261	EX_succ_e	10.8056	-10	0.0694611	4	31.7019	-5.75177	27.0716	-3.75903	8.38941	b2415, b3736, b2919, b1380	2DGLCptspp, ACGAptspp, ACMANAptspp, ACMUMptspp, ARBTptspp, ASCBptspp, ATPS4rpp, CELBpts, CHTBSptspp, DHAPT, FRUpts2pp, FRUptspp, GALTptspp, GAMptspp, GLCptspp, LDH_D, MALTptspp, MANGLYCptspp, MANptspp, MMCD, MNLptspp, SBTptspp, SUCptspp, TREptspp
590	-54.8261	EX_succ_e	10.8056	-10	0.0694611	4	31.7019	-5.75177	27.0716	-3.75903	8.38941	b2415, b3736, b1380, b2917	2DGLCptspp, ACGAptspp, ACMANAptspp, ACMUMptspp, ARBTptspp, ASCBptspp, ATPS4rpp, CELBpts, CHTBSptspp, DHAPT, FRUpts2pp, FRUptspp, GALTptspp, GAMptspp, GLCptspp, LDH_D, MALTptspp, MANGLYCptspp, MANptspp, MMM, MNLptspp, SBTptspp, SUCptspp, TREptspp
591	-54.8261	EX_succ_e	10.8056	-10	0.0694611	4	31.7019	-5.75177	27.0716	-3.75903	8.38941	b2415, b3732, b2919, b1380	2DGLCptspp, ACGAptspp, ACMANAptspp, ACMUMptspp, ARBTptspp, ASCBptspp, ATPS4rpp, CELBpts, CHTBSptspp, DHAPT, FRUpts2pp, FRUptspp, GALTptspp, GAMptspp, GLCptspp, LDH_D, MALTptspp, MANGLYCptspp, MANptspp, MMCD, MNLptspp, SBTptspp, SUCptspp, TREptspp
592	-54.8261	EX_succ_e	10.8056	-10	0.0694611	4	31.7019	-5.75177	27.0716	-3.75903	8.38941	b2415, b3732, b1380, b2917	2DGLCptspp, ACGAptspp, ACMANAptspp, ACMUMptspp, ARBTptspp, ASCBptspp, ATPS4rpp, CELBpts, CHTBSptspp, DHAPT, FRUpts2pp, FRUptspp, GALTptspp, GAMptspp, GLCptspp, LDH_D, MALTptspp, MANGLYCptspp, MANptspp, MMM, MNLptspp, SBTptspp, SUCptspp, TREptspp
593	-54.8261	EX_succ_e	10.8056	-10	0.0694611	4	31.7019	-5.75177	27.0716	-3.75903	8.38941	b2415, b3736, b3909, b1380	2DGLCptspp, ACGAptspp, ACMANAptspp, ACMUMptspp, ARBTptspp, ASCBptspp, ATPS4rpp, CELBpts, CHTBSptspp, DDGLCNt2rpp, DHAPT, FRUpts2pp, FRUptspp, GALTptspp, GAMptspp, GLCptspp, LDH_D, MALTptspp, MANGLYCptspp, MANptspp, MNLptspp, SBTptspp, SUCptspp, TREptspp
594	-54.8261	EX_succ_e	10.8056	-10	0.0694611	4	31.7019	-5.75177	27.0716	-3.75903	8.38941	b2415, b3732, b3909, b1380	2DGLCptspp, ACGAptspp, ACMANAptspp, ACMUMptspp, ARBTptspp, ASCBptspp, ATPS4rpp, CELBpts, CHTBSptspp, DDGLCNt2rpp, DHAPT, FRUpts2pp, FRUptspp, GALTptspp, GAMptspp, GLCptspp, LDH_D, MALTptspp, MANGLYCptspp, MANptspp, MNLptspp, SBTptspp, SUCptspp, TREptspp
595	-54.8261	EX_succ_e	10.8056	-10	0.0694611	4	31.7019	-5.75177	27.0716	-3.75903	8.38941	b2415, b3732, b1380, b4209	2DGLCptspp, ACGAptspp, ACMANAptspp, ACMUMptspp, ARBTptspp, ASCBptspp, ATPS4rpp, CELBpts, CHTBSptspp, DHAPT, FESR, FRUpts2pp, FRUptspp, GALTptspp, GAMptspp, GLCptspp, LDH_D, MALTptspp, MANGLYCptspp, MANptspp, MNLptspp, SBTptspp, SUCptspp, TREptspp
596	-54.8261	EX_succ_e	10.8056	-10	0.0694611	4	31.7019	-5.75177	27.0716	-3.75903	8.38941	b2415, b3732, b1380, b3572	2DGLCptspp, ACGAptspp, ACMANAptspp, ACMUMptspp, ARBTptspp, ASCBptspp, ATPS4rpp, CELBpts, CHTBSptspp, DHAPT, FRUpts2pp, FRUptspp, GALTptspp, GAMptspp, GLCptspp, LDH_D, MALTptspp, MANGLYCptspp, MANptspp, MNLptspp, SBTptspp, SUCptspp, TREptspp, VPAMTr
597	-54.8261	EX_succ_e	10.8056	-10	0.0694611	4	31.7019	-5.75177	27.0716	-3.75903	8.38941	b2415, b3736, b1380, b3572	2DGLCptspp, ACGAptspp, ACMANAptspp, ACMUMptspp, ARBTptspp, ASCBptspp, ATPS4rpp, CELBpts, CHTBSptspp, DHAPT, FRUpts2pp, FRUptspp, GALTptspp, GAMptspp, GLCptspp, LDH_D, MALTptspp, MANGLYCptspp, MANptspp, MNLptspp, SBTptspp, SUCptspp, TREptspp, VPAMTr
598	-54.8261	EX_succ_e	10.8056	-10	0.0694611	4	31.7019	-5.75177	27.0716	-3.75903	8.38941	b2415, b3736, b1380, b1389	2DGLCptspp, ACGAptspp, ACMANAptspp, ACMUMptspp, ARBTptspp, ASCBptspp, ATPS4rpp, CELBpts, CHTBSptspp, DHAPT, FRUpts2pp, FRUptspp, GALTptspp, GAMptspp, GLCptspp, LDH_D, MALTptspp, MANGLYCptspp, MANptspp, MNLptspp, PACCOAE, SBTptspp, SUCptspp, TREptspp
599	-54.8261	EX_succ_e	10.8056	-10	0.0694611	4	31.7019	-5.75177	27.0716	-3.75903	8.38941	b2415, b3732, b1380, b1387	2DGLCptspp, ACGAptspp, ACMANAptspp, ACMUMptspp, ARBTptspp, ASCBptspp, ATPS4rpp, CELBpts, CHTBSptspp, DHAPT, FRUpts2pp, FRUptspp, GALTptspp, GAMptspp, GLCptspp, LDH_D, MALTptspp, MANGLYCptspp, MANptspp, MNLptspp, OXCOAHDH, SBTptspp, SUCptspp, TREptspp
600	-54.8261	EX_succ_e	10.8056	-10	0.0694611	4	31.7019	-5.75177	27.0716	-3.75903	8.38941	b2415, b3732, b1380, b1393	2DGLCptspp, ACGAptspp, ACMANAptspp, ACMUMptspp, ARBTptspp, ASCBptspp, ATPS4rpp, CELBpts, CHTBSptspp, DHACOAH, DHAPT, FRUpts2pp, FRUptspp, GALTptspp, GAMptspp, GLCptspp, LDH_D, MALTptspp, MANGLYCptspp, MANptspp, MNLptspp, SBTptspp, SUCptspp, TREptspp
601	-54.8261	EX_succ_e	10.8056	-10	0.0694611	4	31.7019	-5.75177	27.0716	-3.75903	8.38941	b2415, b3732, b1380, b1395	2DGLCptspp, ACGAptspp, ACMANAptspp, ACMUMptspp, ARBTptspp, ASCBptspp, ATPS4rpp, CELBpts, CHTBSptspp, DHAPT, FRUpts2pp, FRUptspp, GALTptspp, GAMptspp, GLCptspp, HADPCOADH3, LDH_D, MALTptspp, MANGLYCptspp, MANptspp, MNLptspp, SBTptspp, SUCptspp, TREptspp
602	-54.8261	EX_succ_e	10.8056	-10	0.0694611	4	31.7019	-5.75177	27.0716	-3.75903	8.38941	b2415, b3736, b1380, b1387	2DGLCptspp, ACGAptspp, ACMANAptspp, ACMUMptspp, ARBTptspp, ASCBptspp, ATPS4rpp, CELBpts, CHTBSptspp, DHAPT, FRUpts2pp, FRUptspp, GALTptspp, GAMptspp, GLCptspp, LDH_D, MALTptspp, MANGLYCptspp, MANptspp, MNLptspp, OXCOAHDH, SBTptspp, SUCptspp, TREptspp
603	-54.8261	EX_succ_e	10.8056	-10	0.0694611	4	31.7019	-5.75177	27.0716	-3.75903	8.38941	b2415, b3736, b1380, b1393	2DGLCptspp, ACGAptspp, ACMANAptspp, ACMUMptspp, ARBTptspp, ASCBptspp, ATPS4rpp, CELBpts, CHTBSptspp, DHACOAH, DHAPT, FRUpts2pp, FRUptspp, GALTptspp, GAMptspp, GLCptspp, LDH_D, MALTptspp, MANGLYCptspp, MANptspp, MNLptspp, SBTptspp, SUCptspp, TREptspp
604	-54.8261	EX_succ_e	10.8056	-10	0.0694611	4	31.7019	-5.75177	27.0716	-3.75903	8.38941	b2415, b3732, b1380, b1389	2DGLCptspp, ACGAptspp, ACMANAptspp, ACMUMptspp, ARBTptspp, ASCBptspp, ATPS4rpp, CELBpts, CHTBSptspp, DHAPT, FRUpts2pp, FRUptspp, GALTptspp, GAMptspp, GLCptspp, LDH_D, MALTptspp, MANGLYCptspp, MANptspp, MNLptspp, PACCOAE, SBTptspp, SUCptspp, TREptspp
605	-54.8261	EX_succ_e	10.8056	-10	0.0694611	4	31.7019	-5.75177	27.0716	-3.75903	8.38941	b2415, b3736, b1380, b1395	2DGLCptspp, ACGAptspp, ACMANAptspp, ACMUMptspp, ARBTptspp, ASCBptspp, ATPS4rpp, CELBpts, CHTBSptspp, DHAPT, FRUpts2pp, FRUptspp, GALTptspp, GAMptspp, GLCptspp, HADPCOADH3, LDH_D, MALTptspp, MANGLYCptspp, MANptspp, MNLptspp, SBTptspp, SUCptspp, TREptspp
606	-54.8261	EX_succ_e	10.8056	-10	0.0694611	4	31.7019	-5.75177	27.0716	-3.75903	8.38941	b2415, b3737, b1380, b1394	2DGLCptspp, ACGAptspp, ACMANAptspp, ACMUMptspp, ARBTptspp, ASCBptspp, ATPS4rpp, CELBpts, CHTBSptspp, DHAPT, FRUpts2pp, FRUptspp, GALTptspp, GAMptspp, GLCptspp, LDH_D, MALTptspp, MANGLYCptspp, MANptspp, MNLptspp, OXDHCOAT, REPHACCOAI, SBTptspp, SUCptspp, TREptspp
607	-54.8261	EX_succ_e	10.8056	-10	0.0694611	4	31.7019	-5.75177	27.0716	-3.75903	8.38941	b2415, b3732, b1380, b1397	2DGLCptspp, 3OXCOAT, ACGAptspp, ACMANAptspp, ACMUMptspp, ARBTptspp, ASCBptspp, ATPS4rpp, CELBpts, CHTBSptspp, DHAPT, FRUpts2pp, FRUptspp, GALTptspp, GAMptspp, GLCptspp, LDH_D, MALTptspp, MANGLYCptspp, MANptspp, MNLptspp, OXDHCOAT, SBTptspp, SUCptspp, TREptspp
608	-54.8261	EX_succ_e	10.8056	-10	0.0694611	4	31.7019	-5.75177	27.0716	-3.75903	8.38941	b2415, b3736, b1380, b1392	2DGLCptspp, ACGAptspp, ACMANAptspp, ACMUMptspp, ARBTptspp, ASCBptspp, ATPS4rpp, CELBpts, CHTBSptspp, DHAPT, FRUpts2pp, FRUptspp, GALTptspp, GAMptspp, GLCptspp, LDH_D, MALTptspp, MANGLYCptspp, MANptspp, MNLptspp, PACCOAE, SBTptspp, SUCptspp, TREptspp
609	-54.8261	EX_succ_e	10.8056	-10	0.0694611	4	31.7019	-5.75177	27.0716	-3.75903	8.38941	b2415, b3736, b1380, b1394	2DGLCptspp, ACGAptspp, ACMANAptspp, ACMUMptspp, ARBTptspp, ASCBptspp, ATPS4rpp, CELBpts, CHTBSptspp, DHAPT, FRUpts2pp, FRUptspp, GALTptspp, GAMptspp, GLCptspp, LDH_D, MALTptspp, MANGLYCptspp, MANptspp, MNLptspp, OXDHCOAT, REPHACCOAI, SBTptspp, SUCptspp, TREptspp
610	-54.8261	EX_succ_e	10.8056	-10	0.0694611	4	31.7019	-5.75177	27.0716	-3.75903	8.38941	b2415, b3732, b1380, b1390	2DGLCptspp, ACGAptspp, ACMANAptspp, ACMUMptspp, ARBTptspp, ASCBptspp, ATPS4rpp, CELBpts, CHTBSptspp, DHAPT, FRUpts2pp, FRUptspp, GALTptspp, GAMptspp, GLCptspp, LDH_D, MALTptspp, MANGLYCptspp, MANptspp, MNLptspp, PACCOAE, SBTptspp, SUCptspp, TREptspp
611	-54.8261	EX_succ_e	10.8056	-10	0.0694611	4	31.7019	-5.75177	27.0716	-3.75903	8.38941	b2415, b3732, b1380, b1391	2DGLCptspp, ACGAptspp, ACMANAptspp, ACMUMptspp, ARBTptspp, ASCBptspp, ATPS4rpp, CELBpts, CHTBSptspp, DHAPT, FRUpts2pp, FRUptspp, GALTptspp, GAMptspp, GLCptspp, LDH_D, MALTptspp, MANGLYCptspp, MANptspp, MNLptspp, PACCOAE, SBTptspp, SUCptspp, TREptspp
612	-54.8261	EX_succ_e	10.8056	-10	0.0694611	4	31.7019	-5.75177	27.0716	-3.75903	8.38941	b2415, b3732, b1380, b1392	2DGLCptspp, ACGAptspp, ACMANAptspp, ACMUMptspp, ARBTptspp, ASCBptspp, ATPS4rpp, CELBpts, CHTBSptspp, DHAPT, FRUpts2pp, FRUptspp, GALTptspp, GAMptspp, GLCptspp, LDH_D, MALTptspp, MANGLYCptspp, MANptspp, MNLptspp, PACCOAE, SBTptspp, SUCptspp, TREptspp
613	-54.8261	EX_succ_e	10.8056	-10	0.0694611	4	31.7019	-5.75177	27.0716	-3.75903	8.38941	b2415, b3732, b1380, b1388	2DGLCptspp, ACGAptspp, ACMANAptspp, ACMUMptspp, ARBTptspp, ASCBptspp, ATPS4rpp, CELBpts, CHTBSptspp, DHAPT, FRUpts2pp, FRUptspp, GALTptspp, GAMptspp, GLCptspp, LDH_D, MALTptspp, MANGLYCptspp, MANptspp, MNLptspp, PACCOAE, SBTptspp, SUCptspp, TREptspp
614	-54.8261	EX_succ_e	10.8056	-10	0.0694611	4	31.7019	-5.75177	27.0716	-3.75903	8.38941	b2415, b3736, b1380, b1390	2DGLCptspp, ACGAptspp, ACMANAptspp, ACMUMptspp, ARBTptspp, ASCBptspp, ATPS4rpp, CELBpts, CHTBSptspp, DHAPT, FRUpts2pp, FRUptspp, GALTptspp, GAMptspp, GLCptspp, LDH_D, MALTptspp, MANGLYCptspp, MANptspp, MNLptspp, PACCOAE, SBTptspp, SUCptspp, TREptspp
615	-54.8261	EX_succ_e	10.8056	-10	0.0694611	4	31.7019	-5.75177	27.0716	-3.75903	8.38941	b2415, b3736, b1380, b1391	2DGLCptspp, ACGAptspp, ACMANAptspp, ACMUMptspp, ARBTptspp, ASCBptspp, ATPS4rpp, CELBpts, CHTBSptspp, DHAPT, FRUpts2pp, FRUptspp, GALTptspp, GAMptspp, GLCptspp, LDH_D, MALTptspp, MANGLYCptspp, MANptspp, MNLptspp, PACCOAE, SBTptspp, SUCptspp, TREptspp
616	-54.8261	EX_succ_e	10.8056	-10	0.0694611	4	31.7019	-5.75177	27.0716	-3.75903	8.38941	b2415, b3732, b3825, b1380	2DGLCptspp, ACGAptspp, ACMANAptspp, ACMUMptspp, ARBTptspp, ASCBptspp, ATPS4rpp, CELBpts, CHTBSptspp, DHAPT, FRUpts2pp, FRUptspp, GALTptspp, GAMptspp, GLCptspp, LDH_D, LPLIPAL2A120, LPLIPAL2A140, LPLIPAL2A141, LPLIPAL2A160, LPLIPAL2A161, LPLIPAL2A180, LPLIPAL2A181, LPLIPAL2ATE120, LPLIPAL2ATE140, LPLIPAL2ATE141, LPLIPAL2ATE160, LPLIPAL2ATE161, LPLIPAL2ATE180, LPLIPAL2ATE181, LPLIPAL2ATG120, LPLIPA…
617	-54.8261	EX_succ_e	10.8056	-10	0.0694611	4	31.7019	-5.75177	27.0716	-3.75903	8.38941	b2415, b3736, b3825, b1380	2DGLCptspp, ACGAptspp, ACMANAptspp, ACMUMptspp, ARBTptspp, ASCBptspp, ATPS4rpp, CELBpts, CHTBSptspp, DHAPT, FRUpts2pp, FRUptspp, GALTptspp, GAMptspp, GLCptspp, LDH_D, LPLIPAL2A120, LPLIPAL2A140, LPLIPAL2A141, LPLIPAL2A160, LPLIPAL2A161, LPLIPAL2A180, LPLIPAL2A181, LPLIPAL2ATE120, LPLIPAL2ATE140, LPLIPAL2ATE141, LPLIPAL2ATE160, LPLIPAL2ATE161, LPLIPAL2ATE180, LPLIPAL2ATE181, LPLIPAL2ATG120, LPLIPA…
618	-54.8261	EX_succ_e	10.8056	-10	0.0694611	4	31.7019	-5.75177	27.0716	-3.75903	8.38941	b0678, b2415, b3732, b1380	2DGLCptspp, ACGAptspp, ACMANAptspp, ACMUMptspp, ARBTptspp, ASCBptspp, ATPS4rpp, CELBpts, CHTBSptspp, DHAPT, FRUpts2pp, FRUptspp, G6PDA, GALTptspp, GAMptspp, GLCptspp, LDH_D, MALTptspp, MANGLYCptspp, MANptspp, MNLptspp, SBTptspp, SUCptspp, TREptspp
619	-54.8261	EX_succ_e	10.8056	-10	0.0694611	4	31.7019	-5.75177	27.0716	-3.75903	8.38941	b2415, b3732, b1380, b4233	2DGLCptspp, ACGAptspp, ACMANAptspp, ACMUMptspp, ARBTptspp, ASCBptspp, ATPS4rpp, CELBpts, CHTBSptspp, DHAPT, FRUpts2pp, FRUptspp, GALTptspp, GAMptspp, GLCptspp, LDH_D, MALTptspp, MANGLYCptspp, MANptspp, MNLptspp, SBTptspp, SUCptspp, TREptspp, UM3PL, UM4PL
620	-54.8261	EX_succ_e	10.8056	-10	0.0694611	4	31.7019	-5.75177	27.0716	-3.75903	8.38941	b2415, b3736, b1380, b4233	2DGLCptspp, ACGAptspp, ACMANAptspp, ACMUMptspp, ARBTptspp, ASCBptspp, ATPS4rpp, CELBpts, CHTBSptspp, DHAPT, FRUpts2pp, FRUptspp, GALTptspp, GAMptspp, GLCptspp, LDH_D, MALTptspp, MANGLYCptspp, MANptspp, MNLptspp, SBTptspp, SUCptspp, TREptspp, UM3PL, UM4PL
621	-54.8261	EX_succ_e	10.8056	-10	0.0694611	4	31.7019	-5.75177	27.0716	-3.75903	8.38941	b2415, b3915, b3736, b1380	2DGLCptspp, ACGAptspp, ACMANAptspp, ACMUMptspp, ARBTptspp, ASCBptspp, ATPS4rpp, CELBpts, CHTBSptspp, DHAPT, FE2t3pp, FRUpts2pp, FRUptspp, GALTptspp, GAMptspp, GLCptspp, HG2t3pp, LDH_D, MALTptspp, MANGLYCptspp, MANptspp, MNLptspp, SBTptspp, SUCptspp, TREptspp
622	-54.8261	EX_succ_e	10.8056	-10	0.0694611	4	31.7019	-5.75177	27.0716	-3.75903	8.38941	b2415, b3915, b3732, b1380	2DGLCptspp, ACGAptspp, ACMANAptspp, ACMUMptspp, ARBTptspp, ASCBptspp, ATPS4rpp, CELBpts, CHTBSptspp, DHAPT, FE2t3pp, FRUpts2pp, FRUptspp, GALTptspp, GAMptspp, GLCptspp, HG2t3pp, LDH_D, MALTptspp, MANGLYCptspp, MANptspp, MNLptspp, SBTptspp, SUCptspp, TREptspp
623	-54.8261	EX_succ_e	10.8056	-10	0.0694611	4	31.7019	-5.75177	27.0716	-3.75903	8.38941	b3500, b2415, b3736, b1380	2DGLCptspp, ACGAptspp, ACMANAptspp, ACMUMptspp, ARBTptspp, ASCBptspp, ATPS4rpp, CELBpts, CHTBSptspp, DHAPT, FRUpts2pp, FRUptspp, GALTptspp, GAMptspp, GLCptspp, GTHOr, LDH_D, MALTptspp, MANGLYCptspp, MANptspp, MNLptspp, SBTptspp, SUCptspp, TREptspp
624	-54.8261	EX_succ_e	10.8056	-10	0.0694611	4	31.7019	-5.75177	27.0716	-3.75903	8.38941	b3500, b2415, b3732, b1380	2DGLCptspp, ACGAptspp, ACMANAptspp, ACMUMptspp, ARBTptspp, ASCBptspp, ATPS4rpp, CELBpts, CHTBSptspp, DHAPT, FRUpts2pp, FRUptspp, GALTptspp, GAMptspp, GLCptspp, GTHOr, LDH_D, MALTptspp, MANGLYCptspp, MANptspp, MNLptspp, SBTptspp, SUCptspp, TREptspp
625	-54.8261	EX_succ_e	10.8056	-10	0.0694611	4	31.7019	-5.75177	27.0716	-3.75903	8.38941	b1849, b2415, b3732, b1380	2DGLCptspp, ACGAptspp, ACMANAptspp, ACMUMptspp, ARBTptspp, ASCBptspp, ATPS4rpp, CELBpts, CHTBSptspp, DHAPT, FRUpts2pp, FRUptspp, GALTptspp, GAMptspp, GART, GLCptspp, LDH_D, MALTptspp, MANGLYCptspp, MANptspp, MNLptspp, SBTptspp, SUCptspp, TREptspp
626	-54.8261	EX_succ_e	10.8056	-10	0.0694611	4	31.7019	-5.75177	27.0716	-3.75903	8.38941	b1849, b2415, b3736, b1380	2DGLCptspp, ACGAptspp, ACMANAptspp, ACMUMptspp, ARBTptspp, ASCBptspp, ATPS4rpp, CELBpts, CHTBSptspp, DHAPT, FRUpts2pp, FRUptspp, GALTptspp, GAMptspp, GART, GLCptspp, LDH_D, MALTptspp, MANGLYCptspp, MANptspp, MNLptspp, SBTptspp, SUCptspp, TREptspp
627	-54.8261	EX_succ_e	10.8056	-10	0.0694611	4	31.7019	-5.75177	27.0716	-3.75903	8.38941	b2415, b1525, b3732, b1380	2DGLCptspp, ACGAptspp, ACMANAptspp, ACMUMptspp, ARBTptspp, ASCBptspp, ATPS4rpp, CELBpts, CHTBSptspp, DHAPT, FRUpts2pp, FRUptspp, GALTptspp, GAMptspp, GLCptspp, LDH_D, MALTptspp, MANGLYCptspp, MANptspp, MNLptspp, SBTptspp, SSALx, SUCptspp, TREptspp
628	-54.8261	EX_succ_e	10.8056	-10	0.0694611	4	31.7019	-5.75177	27.0716	-3.75903	8.38941	b2415, b3732, b1380, b2923	2DGLCptspp, ACGAptspp, ACMANAptspp, ACMUMptspp, ARBTptspp, ARGt3pp, ASCBptspp, ATPS4rpp, CELBpts, CHTBSptspp, DHAPT, FRUpts2pp, FRUptspp, GALTptspp, GAMptspp, GLCptspp, LDH_D, MALTptspp, MANGLYCptspp, MANptspp, MNLptspp, SBTptspp, SUCptspp, TREptspp
629	-54.8261	EX_succ_e	10.8056	-10	0.0694611	4	31.7019	-5.75177	27.0716	-3.75903	8.38941	b2415, b3736, b1380, b2923	2DGLCptspp, ACGAptspp, ACMANAptspp, ACMUMptspp, ARBTptspp, ARGt3pp, ASCBptspp, ATPS4rpp, CELBpts, CHTBSptspp, DHAPT, FRUpts2pp, FRUptspp, GALTptspp, GAMptspp, GLCptspp, LDH_D, MALTptspp, MANGLYCptspp, MANptspp, MNLptspp, SBTptspp, SUCptspp, TREptspp
630	-54.8261	EX_succ_e	10.8056	-10	0.0694611	4	31.7019	-5.75177	27.0716	-3.75903	8.38941	b2415, b4119, b3732, b1380	2DGLCptspp, ACGAptspp, ACMANAptspp, ACMUMptspp, ARBTptspp, ASCBptspp, ATPS4rpp, CELBpts, CHTBSptspp, DHAPT, FRUpts2pp, FRUptspp, GALS3, GALTptspp, GAMptspp, GLCptspp, LDH_D, MALTptspp, MANGLYCptspp, MANptspp, MNLptspp, SBTptspp, SUCptspp, TREptspp
631	-54.8261	EX_succ_e	10.8056	-10	0.0694611	4	31.7019	-5.75177	27.0716	-3.75903	8.38941	b2415, b4119, b3736, b1380	2DGLCptspp, ACGAptspp, ACMANAptspp, ACMUMptspp, ARBTptspp, ASCBptspp, ATPS4rpp, CELBpts, CHTBSptspp, DHAPT, FRUpts2pp, FRUptspp, GALS3, GALTptspp, GAMptspp, GLCptspp, LDH_D, MALTptspp, MANGLYCptspp, MANptspp, MNLptspp, SBTptspp, SUCptspp, TREptspp
632	-54.8261	EX_succ_e	10.8056	-10	0.0694611	4	31.7019	-5.75177	27.0716	-3.75903	8.38941	b2415, b3736, b2149, b1380	2DGLCptspp, ACGAptspp, ACMANAptspp, ACMUMptspp, ARBTptspp, ASCBptspp, ATPS4rpp, CELBpts, CHTBSptspp, DHAPT, FRUpts2pp, FRUptspp, GALTptspp, GAMptspp, GLCabcpp, GLCptspp, LDH_D, MALTptspp, MANGLYCptspp, MANptspp, MNLptspp, SBTptspp, SUCptspp, TREptspp
633	-54.8261	EX_succ_e	10.8056	-10	0.0694611	4	31.7019	-5.75177	27.0716	-3.75903	8.38941	b2415, b3732, b2150, b1380	2DGLCptspp, ACGAptspp, ACMANAptspp, ACMUMptspp, ARBTptspp, ASCBptspp, ATPS4rpp, CELBpts, CHTBSptspp, DHAPT, FRUpts2pp, FRUptspp, GALTptspp, GAMptspp, GLCabcpp, GLCptspp, LDH_D, MALTptspp, MANGLYCptspp, MANptspp, MNLptspp, SBTptspp, SUCptspp, TREptspp
634	-54.8261	EX_succ_e	10.8056	-10	0.0694611	4	31.7019	-5.75177	27.0716	-3.75903	8.38941	b2415, b3736, b2150, b1380	2DGLCptspp, ACGAptspp, ACMANAptspp, ACMUMptspp, ARBTptspp, ASCBptspp, ATPS4rpp, CELBpts, CHTBSptspp, DHAPT, FRUpts2pp, FRUptspp, GALTptspp, GAMptspp, GLCabcpp, GLCptspp, LDH_D, MALTptspp, MANGLYCptspp, MANptspp, MNLptspp, SBTptspp, SUCptspp, TREptspp
635	-54.8261	EX_succ_e	10.8056	-10	0.0694611	4	31.7019	-5.75177	27.0716	-3.75903	8.38941	b2415, b3732, b2148, b1380	2DGLCptspp, ACGAptspp, ACMANAptspp, ACMUMptspp, ARBTptspp, ASCBptspp, ATPS4rpp, CELBpts, CHTBSptspp, DHAPT, FRUpts2pp, FRUptspp, GALTptspp, GAMptspp, GLCabcpp, GLCptspp, LDH_D, MALTptspp, MANGLYCptspp, MANptspp, MNLptspp, SBTptspp, SUCptspp, TREptspp
636	-54.8261	EX_succ_e	10.8056	-10	0.0694611	4	31.7019	-5.75177	27.0716	-3.75903	8.38941	b2415, b3732, b2149, b1380	2DGLCptspp, ACGAptspp, ACMANAptspp, ACMUMptspp, ARBTptspp, ASCBptspp, ATPS4rpp, CELBpts, CHTBSptspp, DHAPT, FRUpts2pp, FRUptspp, GALTptspp, GAMptspp, GLCabcpp, GLCptspp, LDH_D, MALTptspp, MANGLYCptspp, MANptspp, MNLptspp, SBTptspp, SUCptspp, TREptspp
637	-54.8261	EX_succ_e	10.8056	-10	0.0694611	4	31.7019	-5.75177	27.0716	-3.75903	8.38941	b2415, b3736, b2148, b1380	2DGLCptspp, ACGAptspp, ACMANAptspp, ACMUMptspp, ARBTptspp, ASCBptspp, ATPS4rpp, CELBpts, CHTBSptspp, DHAPT, FRUpts2pp, FRUptspp, GALTptspp, GAMptspp, GLCabcpp, GLCptspp, LDH_D, MALTptspp, MANGLYCptspp, MANptspp, MNLptspp, SBTptspp, SUCptspp, TREptspp
638	-54.8261	EX_succ_e	10.8056	-10	0.0694611	4	31.7019	-5.75177	27.0716	-3.75903	8.38941	b2415, b3736, b1380, b1684	2DGLCptspp, ACGAptspp, ACMANAptspp, ACMUMptspp, ARBTptspp, ASCBptspp, ATPS4rpp, CELBpts, CHTBSptspp, DHAPT, FRUpts2pp, FRUptspp, GALTptspp, GAMptspp, GLCptspp, LDH_D, MALTptspp, MANGLYCptspp, MANptspp, MNLptspp, S2FE2ST, S4FE4ST, SBTptspp, SUCptspp, TREptspp
639	-54.8261	EX_succ_e	10.8056	-10	0.0694611	4	31.7019	-5.75177	27.0716	-3.75903	8.38941	b2415, b3732, b1680, b1380	2DGLCptspp, ACGAptspp, ACMANAptspp, ACMUMptspp, ARBTptspp, ASCBptspp, ATPS4rpp, CELBpts, CHTBSptspp, DHAPT, FRUpts2pp, FRUptspp, GALTptspp, GAMptspp, GLCptspp, LDH_D, MALTptspp, MANGLYCptspp, MANptspp, MNLptspp, S2FE2SR, S2FE2SS, S2FE2SS2, SBTptspp, SCYSDS, SUCptspp, TREptspp
640	-54.8261	EX_succ_e	10.8056	-10	0.0694611	4	31.7019	-5.75177	27.0716	-3.75903	8.38941	b2415, b3732, b1380, b1681	2DGLCptspp, ACGAptspp, ACMANAptspp, ACMUMptspp, ARBTptspp, ASCBptspp, ATPS4rpp, CELBpts, CHTBSptspp, DHAPT, FRUpts2pp, FRUptspp, GALTptspp, GAMptspp, GLCptspp, LDH_D, MALTptspp, MANGLYCptspp, MANptspp, MNLptspp, S2FE2SR, S2FE2SS, S2FE2SS2, S2FE2ST, S4FE4SR, S4FE4ST, SBTptspp, SUCptspp, TREptspp
641	-54.8261	EX_succ_e	10.8056	-10	0.0694611	4	31.7019	-5.75177	27.0716	-3.75903	8.38941	b2415, b3732, b1380, b1679	2DGLCptspp, ACGAptspp, ACMANAptspp, ACMUMptspp, ARBTptspp, ASCBptspp, ATPS4rpp, CELBpts, CHTBSptspp, DHAPT, FRUpts2pp, FRUptspp, GALTptspp, GAMptspp, GLCptspp, LDH_D, MALTptspp, MANGLYCptspp, MANptspp, MNLptspp, S2FE2SR, S2FE2SS, S2FE2SS2, SBTptspp, SCYSDS, SUCptspp, TREptspp
642	-54.8261	EX_succ_e	10.8056	-10	0.0694611	4	31.7019	-5.75177	27.0716	-3.75903	8.38941	b2415, b3736, b1680, b1380	2DGLCptspp, ACGAptspp, ACMANAptspp, ACMUMptspp, ARBTptspp, ASCBptspp, ATPS4rpp, CELBpts, CHTBSptspp, DHAPT, FRUpts2pp, FRUptspp, GALTptspp, GAMptspp, GLCptspp, LDH_D, MALTptspp, MANGLYCptspp, MANptspp, MNLptspp, S2FE2SR, S2FE2SS, S2FE2SS2, SBTptspp, SCYSDS, SUCptspp, TREptspp
643	-54.8261	EX_succ_e	10.8056	-10	0.0694611	4	31.7019	-5.75177	27.0716	-3.75903	8.38941	b2415, b3736, b1380, b1681	2DGLCptspp, ACGAptspp, ACMANAptspp, ACMUMptspp, ARBTptspp, ASCBptspp, ATPS4rpp, CELBpts, CHTBSptspp, DHAPT, FRUpts2pp, FRUptspp, GALTptspp, GAMptspp, GLCptspp, LDH_D, MALTptspp, MANGLYCptspp, MANptspp, MNLptspp, S2FE2SR, S2FE2SS, S2FE2SS2, S2FE2ST, S4FE4SR, S4FE4ST, SBTptspp, SUCptspp, TREptspp
644	-54.8261	EX_succ_e	10.8056	-10	0.0694611	4	31.7019	-5.75177	27.0716	-3.75903	8.38941	b2415, b3736, b1380, b1679	2DGLCptspp, ACGAptspp, ACMANAptspp, ACMUMptspp, ARBTptspp, ASCBptspp, ATPS4rpp, CELBpts, CHTBSptspp, DHAPT, FRUpts2pp, FRUptspp, GALTptspp, GAMptspp, GLCptspp, LDH_D, MALTptspp, MANGLYCptspp, MANptspp, MNLptspp, S2FE2SR, S2FE2SS, S2FE2SS2, SBTptspp, SCYSDS, SUCptspp, TREptspp
645	-54.8261	EX_succ_e	10.8056	-10	0.0694611	4	31.7019	-5.75177	27.0716	-3.75903	8.38941	b2415, b3732, b1380, b1682	2DGLCptspp, ACGAptspp, ACMANAptspp, ACMUMptspp, ARBTptspp, ASCBptspp, ATPS4rpp, CELBpts, CHTBSptspp, DHAPT, FRUpts2pp, FRUptspp, GALTptspp, GAMptspp, GLCptspp, LDH_D, MALTptspp, MANGLYCptspp, MANptspp, MNLptspp, S2FE2SR, S2FE2SS, S2FE2SS2, S2FE2ST, S4FE4SR, S4FE4ST, SBTptspp, SUCptspp, TREptspp
646	-54.8261	EX_succ_e	10.8056	-10	0.0694611	4	31.7019	-5.75177	27.0716	-3.75903	8.38941	b2415, b3736, b1380, b1683	2DGLCptspp, ACGAptspp, ACMANAptspp, ACMUMptspp, ARBTptspp, ASCBptspp, ATPS4rpp, CELBpts, CHTBSptspp, DHAPT, FRUpts2pp, FRUptspp, GALTptspp, GAMptspp, GLCptspp, LDH_D, MALTptspp, MANGLYCptspp, MANptspp, MNLptspp, S2FE2SR, S2FE2SS, S2FE2SS2, S2FE2ST, S4FE4SR, S4FE4ST, SBTptspp, SUCptspp, TREptspp
647	-54.8261	EX_succ_e	10.8056	-10	0.0694611	4	31.7019	-5.75177	27.0716	-3.75903	8.38941	b2415, b3736, b1380, b1682	2DGLCptspp, ACGAptspp, ACMANAptspp, ACMUMptspp, ARBTptspp, ASCBptspp, ATPS4rpp, CELBpts, CHTBSptspp, DHAPT, FRUpts2pp, FRUptspp, GALTptspp, GAMptspp, GLCptspp, LDH_D, MALTptspp, MANGLYCptspp, MANptspp, MNLptspp, S2FE2SR, S2FE2SS, S2FE2SS2, S2FE2ST, S4FE4SR, S4FE4ST, SBTptspp, SUCptspp, TREptspp
648	-54.8261	EX_succ_e	10.8056	-10	0.0694611	4	31.7019	-5.75177	27.0716	-3.75903	8.38941	b2415, b3732, b1380, b1684	2DGLCptspp, ACGAptspp, ACMANAptspp, ACMUMptspp, ARBTptspp, ASCBptspp, ATPS4rpp, CELBpts, CHTBSptspp, DHAPT, FRUpts2pp, FRUptspp, GALTptspp, GAMptspp, GLCptspp, LDH_D, MALTptspp, MANGLYCptspp, MANptspp, MNLptspp, S2FE2ST, S4FE4ST, SBTptspp, SUCptspp, TREptspp
649	-54.8261	EX_succ_e	10.8056	-10	0.0694611	4	31.7019	-5.75177	27.0716	-3.75903	8.38941	b2415, b3736, b1380, b3431	2DGLCptspp, ACGAptspp, ACMANAptspp, ACMUMptspp, ARBTptspp, ASCBptspp, ATPS4rpp, CELBpts, CHTBSptspp, DHAPT, FRUpts2pp, FRUptspp, GALTptspp, GAMptspp, GLCptspp, GLDBRAN2, LDH_D, MALTptspp, MANGLYCptspp, MANptspp, MNLptspp, SBTptspp, SUCptspp, TREptspp
650	-54.8261	EX_succ_e	10.8056	-10	0.0694611	4	31.7019	-5.75177	27.0716	-3.75903	8.38941	b2415, b3732, b1380, b3431	2DGLCptspp, ACGAptspp, ACMANAptspp, ACMUMptspp, ARBTptspp, ASCBptspp, ATPS4rpp, CELBpts, CHTBSptspp, DHAPT, FRUpts2pp, FRUptspp, GALTptspp, GAMptspp, GLCptspp, GLDBRAN2, LDH_D, MALTptspp, MANGLYCptspp, MANptspp, MNLptspp, SBTptspp, SUCptspp, TREptspp
651	-54.8261	EX_succ_e	10.8056	-10	0.0694611	4	31.7019	-5.75177	27.0716	-3.75903	8.38941	b2415, b3732, b1380, b1385	2DGLCptspp, ACGAptspp, ACMANAptspp, ACMUMptspp, ALDD19xr, ARBTptspp, ASCBptspp, ATPS4rpp, CELBpts, CHTBSptspp, DHAPT, FRUpts2pp, FRUptspp, GALTptspp, GAMptspp, GLCptspp, LDH_D, MALTptspp, MANGLYCptspp, MANptspp, MNLptspp, SBTptspp, SUCptspp, TREptspp
652	-54.8261	EX_succ_e	10.8056	-10	0.0694611	4	31.7019	-5.75177	27.0716	-3.75903	8.38941	b2415, b3736, b1380, b1385	2DGLCptspp, ACGAptspp, ACMANAptspp, ACMUMptspp, ALDD19xr, ARBTptspp, ASCBptspp, ATPS4rpp, CELBpts, CHTBSptspp, DHAPT, FRUpts2pp, FRUptspp, GALTptspp, GAMptspp, GLCptspp, LDH_D, MALTptspp, MANGLYCptspp, MANptspp, MNLptspp, SBTptspp, SUCptspp, TREptspp
653	-54.8261	EX_succ_e	10.8056	-10	0.0694611	4	31.7019	-5.75177	27.0716	-3.75903	8.38941	b2243, b2415, b3736, b1380	2DGLCptspp, ACGAptspp, ACMANAptspp, ACMUMptspp, ARBTptspp, ASCBptspp, ATPS4rpp, CELBpts, CHTBSptspp, DHAPT, FRUpts2pp, FRUptspp, G3PD6, G3PD7, GALTptspp, GAMptspp, GLCptspp, LDH_D, MALTptspp, MANGLYCptspp, MANptspp, MNLptspp, SBTptspp, SUCptspp, TREptspp
654	-54.8261	EX_succ_e	10.8056	-10	0.0694611	4	31.7019	-5.75177	27.0716	-3.75903	8.38941	b2241, b2415, b3736, b1380	2DGLCptspp, ACGAptspp, ACMANAptspp, ACMUMptspp, ARBTptspp, ASCBptspp, ATPS4rpp, CELBpts, CHTBSptspp, DHAPT, FRUpts2pp, FRUptspp, G3PD6, G3PD7, GALTptspp, GAMptspp, GLCptspp, LDH_D, MALTptspp, MANGLYCptspp, MANptspp, MNLptspp, SBTptspp, SUCptspp, TREptspp
655	-54.8261	EX_succ_e	10.8056	-10	0.0694611	4	31.7019	-5.75177	27.0716	-3.75903	8.38941	b2242, b2415, b3732, b1380	2DGLCptspp, ACGAptspp, ACMANAptspp, ACMUMptspp, ARBTptspp, ASCBptspp, ATPS4rpp, CELBpts, CHTBSptspp, DHAPT, FRUpts2pp, FRUptspp, G3PD6, G3PD7, GALTptspp, GAMptspp, GLCptspp, LDH_D, MALTptspp, MANGLYCptspp, MANptspp, MNLptspp, SBTptspp, SUCptspp, TREptspp
656	-54.8261	EX_succ_e	10.8056	-10	0.0694611	4	31.7019	-5.75177	27.0716	-3.75903	8.38941	b2242, b2415, b3736, b1380	2DGLCptspp, ACGAptspp, ACMANAptspp, ACMUMptspp, ARBTptspp, ASCBptspp, ATPS4rpp, CELBpts, CHTBSptspp, DHAPT, FRUpts2pp, FRUptspp, G3PD6, G3PD7, GALTptspp, GAMptspp, GLCptspp, LDH_D, MALTptspp, MANGLYCptspp, MANptspp, MNLptspp, SBTptspp, SUCptspp, TREptspp
657	-54.8261	EX_succ_e	10.8056	-10	0.0694611	4	31.7019	-5.75177	27.0716	-3.75903	8.38941	b2243, b2415, b3732, b1380	2DGLCptspp, ACGAptspp, ACMANAptspp, ACMUMptspp, ARBTptspp, ASCBptspp, ATPS4rpp, CELBpts, CHTBSptspp, DHAPT, FRUpts2pp, FRUptspp, G3PD6, G3PD7, GALTptspp, GAMptspp, GLCptspp, LDH_D, MALTptspp, MANGLYCptspp, MANptspp, MNLptspp, SBTptspp, SUCptspp, TREptspp
658	-54.8261	EX_succ_e	10.8056	-10	0.0694611	4	31.7019	-5.75177	27.0716	-3.75903	8.38941	b2241, b2415, b3732, b1380	2DGLCptspp, ACGAptspp, ACMANAptspp, ACMUMptspp, ARBTptspp, ASCBptspp, ATPS4rpp, CELBpts, CHTBSptspp, DHAPT, FRUpts2pp, FRUptspp, G3PD6, G3PD7, GALTptspp, GAMptspp, GLCptspp, LDH_D, MALTptspp, MANGLYCptspp, MANptspp, MNLptspp, SBTptspp, SUCptspp, TREptspp
659	-54.8261	EX_succ_e	10.8056	-10	0.0694611	4	31.7019	-5.75177	27.0716	-3.75903	8.38941	b2415, b3736, b2678, b1380	2DGLCptspp, ACGAptspp, ACMANAptspp, ACMUMptspp, ARBTptspp, ASCBptspp, ATPS4rpp, CELBpts, CHTBSptspp, CRNDabcpp, CRNabcpp, CTBTabcpp, DHAPT, FRUpts2pp, FRUptspp, GALTptspp, GAMptspp, GLCptspp, LDH_D, MALTptspp, MANGLYCptspp, MANptspp, MNLptspp, PROabcpp, SBTptspp, SUCptspp, TREptspp
660	-54.8261	EX_succ_e	10.8056	-10	0.0694611	4	31.7019	-5.75177	27.0716	-3.75903	8.38941	b2415, b3732, b2677, b1380	2DGLCptspp, ACGAptspp, ACMANAptspp, ACMUMptspp, ARBTptspp, ASCBptspp, ATPS4rpp, CELBpts, CHTBSptspp, CRNDabcpp, CRNabcpp, CTBTabcpp, DHAPT, FRUpts2pp, FRUptspp, GALTptspp, GAMptspp, GLCptspp, LDH_D, MALTptspp, MANGLYCptspp, MANptspp, MNLptspp, PROabcpp, SBTptspp, SUCptspp, TREptspp
661	-54.8261	EX_succ_e	10.8056	-10	0.0694611	4	31.7019	-5.75177	27.0716	-3.75903	8.38941	b2415, b3736, b2677, b1380	2DGLCptspp, ACGAptspp, ACMANAptspp, ACMUMptspp, ARBTptspp, ASCBptspp, ATPS4rpp, CELBpts, CHTBSptspp, CRNDabcpp, CRNabcpp, CTBTabcpp, DHAPT, FRUpts2pp, FRUptspp, GALTptspp, GAMptspp, GLCptspp, LDH_D, MALTptspp, MANGLYCptspp, MANptspp, MNLptspp, PROabcpp, SBTptspp, SUCptspp, TREptspp
662	-54.8261	EX_succ_e	10.8056	-10	0.0694611	4	31.7019	-5.75177	27.0716	-3.75903	8.38941	b2415, b3732, b2679, b1380	2DGLCptspp, ACGAptspp, ACMANAptspp, ACMUMptspp, ARBTptspp, ASCBptspp, ATPS4rpp, CELBpts, CHTBSptspp, CRNDabcpp, CRNabcpp, CTBTabcpp, DHAPT, FRUpts2pp, FRUptspp, GALTptspp, GAMptspp, GLCptspp, LDH_D, MALTptspp, MANGLYCptspp, MANptspp, MNLptspp, PROabcpp, SBTptspp, SUCptspp, TREptspp
663	-54.8261	EX_succ_e	10.8056	-10	0.0694611	4	31.7019	-5.75177	27.0716	-3.75903	8.38941	b2415, b3732, b2678, b1380	2DGLCptspp, ACGAptspp, ACMANAptspp, ACMUMptspp, ARBTptspp, ASCBptspp, ATPS4rpp, CELBpts, CHTBSptspp, CRNDabcpp, CRNabcpp, CTBTabcpp, DHAPT, FRUpts2pp, FRUptspp, GALTptspp, GAMptspp, GLCptspp, LDH_D, MALTptspp, MANGLYCptspp, MANptspp, MNLptspp, PROabcpp, SBTptspp, SUCptspp, TREptspp
664	-54.8261	EX_succ_e	10.8056	-10	0.0694611	4	31.7019	-5.75177	27.0716	-3.75903	8.38941	b2415, b3736, b2679, b1380	2DGLCptspp, ACGAptspp, ACMANAptspp, ACMUMptspp, ARBTptspp, ASCBptspp, ATPS4rpp, CELBpts, CHTBSptspp, CRNDabcpp, CRNabcpp, CTBTabcpp, DHAPT, FRUpts2pp, FRUptspp, GALTptspp, GAMptspp, GLCptspp, LDH_D, MALTptspp, MANGLYCptspp, MANptspp, MNLptspp, PROabcpp, SBTptspp, SUCptspp, TREptspp
665	-54.8261	EX_succ_e	10.8056	-10	0.0694611	4	31.7019	-5.75177	27.0716	-3.75903	8.38941	b1613, b2415, b3732, b1380	2DGLCptspp, ACGAptspp, ACMANAptspp, ACMUMptspp, ARBTptspp, ASCBptspp, ATPS4rpp, CELBpts, CHTBSptspp, DHAPT, FRUpts2pp, FRUptspp, GALTptspp, GAMptspp, GLCptspp, LDH_D, MALTptspp, MAN6PI, MANGLYCptspp, MANptspp, MNLptspp, SBTptspp, SUCptspp, TREptspp
666	-54.8261	EX_succ_e	10.8056	-10	0.0694611	4	31.7019	-5.75177	27.0716	-3.75903	8.38941	b1613, b2415, b3736, b1380	2DGLCptspp, ACGAptspp, ACMANAptspp, ACMUMptspp, ARBTptspp, ASCBptspp, ATPS4rpp, CELBpts, CHTBSptspp, DHAPT, FRUpts2pp, FRUptspp, GALTptspp, GAMptspp, GLCptspp, LDH_D, MALTptspp, MAN6PI, MANGLYCptspp, MANptspp, MNLptspp, SBTptspp, SUCptspp, TREptspp
667	-54.8261	EX_succ_e	10.8056	-10	0.0694611	4	31.7019	-5.75177	27.0716	-3.75903	8.38941	b0871, b2415, b3732, b1380	2DGLCptspp, ACGAptspp, ACMANAptspp, ACMUMptspp, ARBTptspp, ASCBptspp, ATPS4rpp, CELBpts, CHTBSptspp, DHAPT, FRUpts2pp, FRUptspp, GALTptspp, GAMptspp, GLCptspp, LDH_D, MALTptspp, MANGLYCptspp, MANptspp, MNLptspp, POX, SBTptspp, SUCptspp, TREptspp
668	-54.8261	EX_succ_e	10.8056	-10	0.0694611	4	31.7019	-5.75177	27.0716	-3.75903	8.38941	b0871, b2415, b3736, b1380	2DGLCptspp, ACGAptspp, ACMANAptspp, ACMUMptspp, ARBTptspp, ASCBptspp, ATPS4rpp, CELBpts, CHTBSptspp, DHAPT, FRUpts2pp, FRUptspp, GALTptspp, GAMptspp, GLCptspp, LDH_D, MALTptspp, MANGLYCptspp, MANptspp, MNLptspp, POX, SBTptspp, SUCptspp, TREptspp
669	-54.8261	EX_succ_e	10.8056	-10	0.0694611	4	31.7019	-5.75177	27.0716	-3.75903	8.38941	b2415, b4367, b3736, b1380	2DGLCptspp, ACGAptspp, ACMANAptspp, ACMUMptspp, ARBTptspp, ASCBptspp, ATPS4rpp, CELBpts, CHTBSptspp, DHAPT, FEOXAMR1, FEOXAMR2, FEOXAMR3, FRUpts2pp, FRUptspp, GALTptspp, GAMptspp, GLCptspp, LDH_D, MALTptspp, MANGLYCptspp, MANptspp, MNLptspp, SBTptspp, SUCptspp, TREptspp
670	-54.8261	EX_succ_e	10.8056	-10	0.0694611	4	31.7019	-5.75177	27.0716	-3.75903	8.38941	b2415, b3736, b3654, b1380	2DGLCptspp, ACGAptspp, ACMANAptspp, ACMUMptspp, ARBTptspp, ASCBptspp, ATPS4rpp, CELBpts, CHTBSptspp, DHAPT, FRUpts2pp, FRUptspp, GALTptspp, GAMptspp, GLCptspp, GUAt2pp, LDH_D, MALTptspp, MANGLYCptspp, MANptspp, MNLptspp, SBTptspp, SUCptspp, TREptspp
671	-54.8261	EX_succ_e	10.8056	-10	0.0694611	4	31.7019	-5.75177	27.0716	-3.75903	8.38941	b2415, b3732, b3654, b1380	2DGLCptspp, ACGAptspp, ACMANAptspp, ACMUMptspp, ARBTptspp, ASCBptspp, ATPS4rpp, CELBpts, CHTBSptspp, DHAPT, FRUpts2pp, FRUptspp, GALTptspp, GAMptspp, GLCptspp, GUAt2pp, LDH_D, MALTptspp, MANGLYCptspp, MANptspp, MNLptspp, SBTptspp, SUCptspp, TREptspp
672	-54.8261	EX_succ_e	10.8056	-10	0.0694611	4	31.7019	-5.75177	27.0716	-3.75903	8.38941	b2415, b3732, b2501, b1380	2DGLCptspp, ACGAptspp, ACMANAptspp, ACMUMptspp, ARBTptspp, ASCBptspp, ATPS4rpp, CELBpts, CHTBSptspp, DHAPT, FRUpts2pp, FRUptspp, GALTptspp, GAMptspp, GLCptspp, LDH_D, MALTptspp, MANGLYCptspp, MANptspp, MNLptspp, PPK, PPK2, SBTptspp, SUCptspp, TREptspp
673	-54.8261	EX_succ_e	10.8056	-10	0.0694611	4	31.7019	-5.75177	27.0716	-3.75903	8.38941	b2415, b3736, b2501, b1380	2DGLCptspp, ACGAptspp, ACMANAptspp, ACMUMptspp, ARBTptspp, ASCBptspp, ATPS4rpp, CELBpts, CHTBSptspp, DHAPT, FRUpts2pp, FRUptspp, GALTptspp, GAMptspp, GLCptspp, LDH_D, MALTptspp, MANGLYCptspp, MANptspp, MNLptspp, PPK, PPK2, SBTptspp, SUCptspp, TREptspp
674	-54.8261	EX_succ_e	10.8056	-10	0.0694611	4	31.7019	-5.75177	27.0716	-3.75903	8.38941	b2415, b0654, b3736, b1380	2DGLCptspp, ACGAptspp, ACMANAptspp, ACMUMptspp, ARBTptspp, ASCBptspp, ASPabcpp, ATPS4rpp, CELBpts, CHTBSptspp, DHAPT, FRUpts2pp, FRUptspp, GALTptspp, GAMptspp, GLCptspp, GLUabcpp, LDH_D, MALTptspp, MANGLYCptspp, MANptspp, MNLptspp, SBTptspp, SUCptspp, TREptspp
675	-54.8261	EX_succ_e	10.8056	-10	0.0694611	4	31.7019	-5.75177	27.0716	-3.75903	8.38941	b2415, b0655, b3736, b1380	2DGLCptspp, ACGAptspp, ACMANAptspp, ACMUMptspp, ARBTptspp, ASCBptspp, ASPabcpp, ATPS4rpp, CELBpts, CHTBSptspp, DHAPT, FRUpts2pp, FRUptspp, GALTptspp, GAMptspp, GLCptspp, GLUabcpp, LDH_D, MALTptspp, MANGLYCptspp, MANptspp, MNLptspp, SBTptspp, SUCptspp, TREptspp
676	-54.8261	EX_succ_e	10.8056	-10	0.0694611	4	31.7019	-5.75177	27.0716	-3.75903	8.38941	b2415, b0653, b3736, b1380	2DGLCptspp, ACGAptspp, ACMANAptspp, ACMUMptspp, ARBTptspp, ASCBptspp, ASPabcpp, ATPS4rpp, CELBpts, CHTBSptspp, DHAPT, FRUpts2pp, FRUptspp, GALTptspp, GAMptspp, GLCptspp, GLUabcpp, LDH_D, MALTptspp, MANGLYCptspp, MANptspp, MNLptspp, SBTptspp, SUCptspp, TREptspp
677	-54.8261	EX_succ_e	10.8056	-10	0.0694611	4	31.7019	-5.75177	27.0716	-3.75903	8.38941	b2415, b0652, b3732, b1380	2DGLCptspp, ACGAptspp, ACMANAptspp, ACMUMptspp, ARBTptspp, ASCBptspp, ASPabcpp, ATPS4rpp, CELBpts, CHTBSptspp, DHAPT, FRUpts2pp, FRUptspp, GALTptspp, GAMptspp, GLCptspp, GLUabcpp, LDH_D, MALTptspp, MANGLYCptspp, MANptspp, MNLptspp, SBTptspp, SUCptspp, TREptspp
678	-54.8261	EX_succ_e	10.8056	-10	0.0694611	4	31.7019	-5.75177	27.0716	-3.75903	8.38941	b2415, b0654, b3732, b1380	2DGLCptspp, ACGAptspp, ACMANAptspp, ACMUMptspp, ARBTptspp, ASCBptspp, ASPabcpp, ATPS4rpp, CELBpts, CHTBSptspp, DHAPT, FRUpts2pp, FRUptspp, GALTptspp, GAMptspp, GLCptspp, GLUabcpp, LDH_D, MALTptspp, MANGLYCptspp, MANptspp, MNLptspp, SBTptspp, SUCptspp, TREptspp
679	-54.8261	EX_succ_e	10.8056	-10	0.0694611	4	31.7019	-5.75177	27.0716	-3.75903	8.38941	b2415, b0652, b3736, b1380	2DGLCptspp, ACGAptspp, ACMANAptspp, ACMUMptspp, ARBTptspp, ASCBptspp, ASPabcpp, ATPS4rpp, CELBpts, CHTBSptspp, DHAPT, FRUpts2pp, FRUptspp, GALTptspp, GAMptspp, GLCptspp, GLUabcpp, LDH_D, MALTptspp, MANGLYCptspp, MANptspp, MNLptspp, SBTptspp, SUCptspp, TREptspp
680	-54.8261	EX_succ_e	10.8056	-10	0.0694611	4	31.7019	-5.75177	27.0716	-3.75903	8.38941	b2415, b0655, b3732, b1380	2DGLCptspp, ACGAptspp, ACMANAptspp, ACMUMptspp, ARBTptspp, ASCBptspp, ASPabcpp, ATPS4rpp, CELBpts, CHTBSptspp, DHAPT, FRUpts2pp, FRUptspp, GALTptspp, GAMptspp, GLCptspp, GLUabcpp, LDH_D, MALTptspp, MANGLYCptspp, MANptspp, MNLptspp, SBTptspp, SUCptspp, TREptspp
681	-54.8261	EX_succ_e	10.8056	-10	0.0694611	4	31.7019	-5.75177	27.0716	-3.75903	8.38941	b2415, b0653, b3732, b1380	2DGLCptspp, ACGAptspp, ACMANAptspp, ACMUMptspp, ARBTptspp, ASCBptspp, ASPabcpp, ATPS4rpp, CELBpts, CHTBSptspp, DHAPT, FRUpts2pp, FRUptspp, GALTptspp, GAMptspp, GLCptspp, GLUabcpp, LDH_D, MALTptspp, MANGLYCptspp, MANptspp, MNLptspp, SBTptspp, SUCptspp, TREptspp
682	-54.8261	EX_succ_e	10.8056	-10	0.0694611	4	31.7019	-5.75177	27.0716	-3.75903	8.38941	b0888, b2415, b3736, b1380	2DGLCptspp, ACGAptspp, ACMANAptspp, ACMUMptspp, ARBTptspp, ASCBptspp, ATPS4rpp, CELBpts, CHTBSptspp, DHAPT, FRUpts2pp, FRUptspp, GALTptspp, GAMptspp, GLCptspp, LDH_D, MALTptspp, MANGLYCptspp, MANptspp, MNLptspp, SBTptspp, SUCptspp, TRDR, TREptspp
683	-54.8261	EX_succ_e	10.8056	-10	0.0694611	4	31.7019	-5.75177	27.0716	-3.75903	8.38941	b0888, b2415, b3732, b1380	2DGLCptspp, ACGAptspp, ACMANAptspp, ACMUMptspp, ARBTptspp, ASCBptspp, ATPS4rpp, CELBpts, CHTBSptspp, DHAPT, FRUpts2pp, FRUptspp, GALTptspp, GAMptspp, GLCptspp, LDH_D, MALTptspp, MANGLYCptspp, MANptspp, MNLptspp, SBTptspp, SUCptspp, TRDR, TREptspp
684	-54.8261	EX_succ_e	10.8056	-10	0.0694611	4	31.7019	-5.75177	27.0716	-3.75903	8.38941	b2415, b1897, b3732, b1380	2DGLCptspp, ACGAptspp, ACMANAptspp, ACMUMptspp, ARBTptspp, ASCBptspp, ATPS4rpp, CELBpts, CHTBSptspp, DHAPT, FRUpts2pp, FRUptspp, GALTptspp, GAMptspp, GLCptspp, LDH_D, MALTptspp, MANGLYCptspp, MANptspp, MNLptspp, SBTptspp, SUCptspp, TRE6PP, TREptspp
685	-54.8261	EX_succ_e	10.8056	-10	0.0694611	4	31.7019	-5.75177	27.0716	-3.75903	8.38941	b3519, b2415, b3736, b1380	2DGLCptspp, ACGAptspp, ACMANAptspp, ACMUMptspp, ARBTptspp, ASCBptspp, ATPS4rpp, CELBpts, CHTBSptspp, DHAPT, FRUpts2pp, FRUptspp, GALTptspp, GAMptspp, GLCptspp, LDH_D, MALTptspp, MANGLYCptspp, MANptspp, MNLptspp, SBTptspp, SUCptspp, TREH, TREptspp
686	-54.8261	EX_succ_e	10.8056	-10	0.0694611	4	31.7019	-5.75177	27.0716	-3.75903	8.38941	b2415, b1897, b3736, b1380	2DGLCptspp, ACGAptspp, ACMANAptspp, ACMUMptspp, ARBTptspp, ASCBptspp, ATPS4rpp, CELBpts, CHTBSptspp, DHAPT, FRUpts2pp, FRUptspp, GALTptspp, GAMptspp, GLCptspp, LDH_D, MALTptspp, MANGLYCptspp, MANptspp, MNLptspp, SBTptspp, SUCptspp, TRE6PP, TREptspp
687	-54.8261	EX_succ_e	10.8056	-10	0.0694611	4	31.7019	-5.75177	27.0716	-3.75903	8.38941	b3519, b2415, b3732, b1380	2DGLCptspp, ACGAptspp, ACMANAptspp, ACMUMptspp, ARBTptspp, ASCBptspp, ATPS4rpp, CELBpts, CHTBSptspp, DHAPT, FRUpts2pp, FRUptspp, GALTptspp, GAMptspp, GLCptspp, LDH_D, MALTptspp, MANGLYCptspp, MANptspp, MNLptspp, SBTptspp, SUCptspp, TREH, TREptspp
688	-54.8261	EX_succ_e	10.8056	-10	0.0694611	4	31.7019	-5.75177	27.0716	-3.75903	8.38941	b2415, b3736, b3728, b1380	2DGLCptspp, ACGAptspp, ACMANAptspp, ACMUMptspp, ARBTptspp, ASCBptspp, ATPS4rpp, CELBpts, CHTBSptspp, DHAPT, FRUpts2pp, FRUptspp, GALTptspp, GAMptspp, GLCptspp, LDH_D, MALTptspp, MANGLYCptspp, MANptspp, MNLptspp, PIuabcpp, SBTptspp, SUCptspp, TREptspp
689	-54.8261	EX_succ_e	10.8056	-10	0.0694611	4	31.7019	-5.75177	27.0716	-3.75903	8.38941	b2415, b3736, b3726, b1380	2DGLCptspp, ACGAptspp, ACMANAptspp, ACMUMptspp, ARBTptspp, ASCBptspp, ATPS4rpp, CELBpts, CHTBSptspp, DHAPT, FRUpts2pp, FRUptspp, GALTptspp, GAMptspp, GLCptspp, LDH_D, MALTptspp, MANGLYCptspp, MANptspp, MNLptspp, PIuabcpp, SBTptspp, SUCptspp, TREptspp
690	-54.8261	EX_succ_e	10.8056	-10	0.0694611	4	31.7019	-5.75177	27.0716	-3.75903	8.38941	b2415, b3738, b3726, b1380	2DGLCptspp, ACGAptspp, ACMANAptspp, ACMUMptspp, ARBTptspp, ASCBptspp, ATPS4rpp, CELBpts, CHTBSptspp, DHAPT, FRUpts2pp, FRUptspp, GALTptspp, GAMptspp, GLCptspp, LDH_D, MALTptspp, MANGLYCptspp, MANptspp, MNLptspp, PIuabcpp, SBTptspp, SUCptspp, TREptspp
691	-54.8261	EX_succ_e	10.8056	-10	0.0694611	4	31.7019	-5.75177	27.0716	-3.75903	8.38941	b2415, b3732, b3727, b1380	2DGLCptspp, ACGAptspp, ACMANAptspp, ACMUMptspp, ARBTptspp, ASCBptspp, ATPS4rpp, CELBpts, CHTBSptspp, DHAPT, FRUpts2pp, FRUptspp, GALTptspp, GAMptspp, GLCptspp, LDH_D, MALTptspp, MANGLYCptspp, MANptspp, MNLptspp, PIuabcpp, SBTptspp, SUCptspp, TREptspp
692	-54.8261	EX_succ_e	10.8056	-10	0.0694611	4	31.7019	-5.75177	27.0716	-3.75903	8.38941	b2415, b3732, b3725, b1380	2DGLCptspp, ACGAptspp, ACMANAptspp, ACMUMptspp, ARBTptspp, ASCBptspp, ATPS4rpp, CELBpts, CHTBSptspp, DHAPT, FRUpts2pp, FRUptspp, GALTptspp, GAMptspp, GLCptspp, LDH_D, MALTptspp, MANGLYCptspp, MANptspp, MNLptspp, PIuabcpp, SBTptspp, SUCptspp, TREptspp
693	-54.8261	EX_succ_e	10.8056	-10	0.0694611	4	31.7019	-5.75177	27.0716	-3.75903	8.38941	b2415, b3736, b3727, b1380	2DGLCptspp, ACGAptspp, ACMANAptspp, ACMUMptspp, ARBTptspp, ASCBptspp, ATPS4rpp, CELBpts, CHTBSptspp, DHAPT, FRUpts2pp, FRUptspp, GALTptspp, GAMptspp, GLCptspp, LDH_D, MALTptspp, MANGLYCptspp, MANptspp, MNLptspp, PIuabcpp, SBTptspp, SUCptspp, TREptspp
694	-54.8261	EX_succ_e	10.8056	-10	0.0694611	4	31.7019	-5.75177	27.0716	-3.75903	8.38941	b2415, b3736, b3725, b1380	2DGLCptspp, ACGAptspp, ACMANAptspp, ACMUMptspp, ARBTptspp, ASCBptspp, ATPS4rpp, CELBpts, CHTBSptspp, DHAPT, FRUpts2pp, FRUptspp, GALTptspp, GAMptspp, GLCptspp, LDH_D, MALTptspp, MANGLYCptspp, MANptspp, MNLptspp, PIuabcpp, SBTptspp, SUCptspp, TREptspp
695	-54.8261	EX_succ_e	10.8056	-10	0.0694611	4	31.7019	-5.75177	27.0716	-3.75903	8.38941	b2415, b3732, b3728, b1380	2DGLCptspp, ACGAptspp, ACMANAptspp, ACMUMptspp, ARBTptspp, ASCBptspp, ATPS4rpp, CELBpts, CHTBSptspp, DHAPT, FRUpts2pp, FRUptspp, GALTptspp, GAMptspp, GLCptspp, LDH_D, MALTptspp, MANGLYCptspp, MANptspp, MNLptspp, PIuabcpp, SBTptspp, SUCptspp, TREptspp
696	-54.8261	EX_succ_e	10.8056	-10	0.0694611	4	31.7019	-5.75177	27.0716	-3.75903	8.38941	b2415, b2904, b3732, b1380	2DGLCptspp, ACGAptspp, ACMANAptspp, ACMUMptspp, ARBTptspp, ASCBptspp, ATPS4rpp, CELBpts, CHTBSptspp, DHAPT, FRUpts2pp, FRUptspp, GALTptspp, GAMptspp, GLCptspp, GLYCL, LDH_D, MALTptspp, MANGLYCptspp, MANptspp, MNLptspp, SBTptspp, SUCptspp, TREptspp
697	-54.8261	EX_succ_e	10.8056	-10	0.0694611	4	31.7019	-5.75177	27.0716	-3.75903	8.38941	b2415, b2904, b3736, b1380	2DGLCptspp, ACGAptspp, ACMANAptspp, ACMUMptspp, ARBTptspp, ASCBptspp, ATPS4rpp, CELBpts, CHTBSptspp, DHAPT, FRUpts2pp, FRUptspp, GALTptspp, GAMptspp, GLCptspp, GLYCL, LDH_D, MALTptspp, MANGLYCptspp, MANptspp, MNLptspp, SBTptspp, SUCptspp, TREptspp
698	-54.8261	EX_succ_e	10.8056	-10	0.0694611	4	31.7019	-5.75177	27.0716	-3.75903	8.38941	b2415, b2905, b3732, b1380	2DGLCptspp, ACGAptspp, ACMANAptspp, ACMUMptspp, ARBTptspp, ASCBptspp, ATPS4rpp, CELBpts, CHTBSptspp, DHAPT, FRUpts2pp, FRUptspp, GALTptspp, GAMptspp, GLCptspp, GLYCL, LDH_D, MALTptspp, MANGLYCptspp, MANptspp, MNLptspp, SBTptspp, SUCptspp, TREptspp
699	-54.8261	EX_succ_e	10.8056	-10	0.0694611	4	31.7019	-5.75177	27.0716	-3.75903	8.38941	b2415, b2903, b3732, b1380	2DGLCptspp, ACGAptspp, ACMANAptspp, ACMUMptspp, ARBTptspp, ASCBptspp, ATPS4rpp, CELBpts, CHTBSptspp, DHAPT, FRUpts2pp, FRUptspp, GALTptspp, GAMptspp, GLCptspp, GLYCL, LDH_D, MALTptspp, MANGLYCptspp, MANptspp, MNLptspp, SBTptspp, SUCptspp, TREptspp
700	-54.8261	EX_succ_e	10.8056	-10	0.0694611	4	31.7019	-5.75177	27.0716	-3.75903	8.38941	b2415, b2905, b3736, b1380	2DGLCptspp, ACGAptspp, ACMANAptspp, ACMUMptspp, ARBTptspp, ASCBptspp, ATPS4rpp, CELBpts, CHTBSptspp, DHAPT, FRUpts2pp, FRUptspp, GALTptspp, GAMptspp, GLCptspp, GLYCL, LDH_D, MALTptspp, MANGLYCptspp, MANptspp, MNLptspp, SBTptspp, SUCptspp, TREptspp
701	-54.8261	EX_succ_e	10.8056	-10	0.0694611	4	31.7019	-5.75177	27.0716	-3.75903	8.38941	b2415, b2903, b3736, b1380	2DGLCptspp, ACGAptspp, ACMANAptspp, ACMUMptspp, ARBTptspp, ASCBptspp, ATPS4rpp, CELBpts, CHTBSptspp, DHAPT, FRUpts2pp, FRUptspp, GALTptspp, GAMptspp, GLCptspp, GLYCL, LDH_D, MALTptspp, MANGLYCptspp, MANptspp, MNLptspp, SBTptspp, SUCptspp, TREptspp
702	-54.8261	EX_succ_e	10.8056	-10	0.0694611	4	31.7019	-5.75177	27.0716	-3.75903	8.38941	b2415, b2406, b3732, b1380	2DGLCptspp, ACGAptspp, ACMANAptspp, ACMUMptspp, ADNt2pp_copy2, ARBTptspp, ASCBptspp, ATPS4rpp, CELBpts, CHTBSptspp, CYTDt2pp_copy2, DHAPT, FRUpts2pp, FRUptspp, GALTptspp, GAMptspp, GLCptspp, LDH_D, MALTptspp, MANGLYCptspp, MANptspp, MNLptspp, SBTptspp, SUCptspp, THMDt2pp_copy2, TREptspp, URIt2pp_copy2, XTSNt2rpp
703	-54.8261	EX_succ_e	10.8056	-10	0.0694611	4	31.7019	-5.75177	27.0716	-3.75903	8.38941	b2415, b2406, b3736, b1380	2DGLCptspp, ACGAptspp, ACMANAptspp, ACMUMptspp, ADNt2pp_copy2, ARBTptspp, ASCBptspp, ATPS4rpp, CELBpts, CHTBSptspp, CYTDt2pp_copy2, DHAPT, FRUpts2pp, FRUptspp, GALTptspp, GAMptspp, GLCptspp, LDH_D, MALTptspp, MANGLYCptspp, MANptspp, MNLptspp, SBTptspp, SUCptspp, THMDt2pp_copy2, TREptspp, URIt2pp_copy2, XTSNt2rpp
704	-54.8261	EX_succ_e	10.8056	-10	0.0694611	4	31.7019	-5.75177	27.0716	-3.75903	8.38941	b2415, b3732, b2866, b1380	2DGLCptspp, ACGAptspp, ACMANAptspp, ACMUMptspp, ARBTptspp, ASCBptspp, ATPS4rpp, CELBpts, CHTBSptspp, DHAPT, FRUpts2pp, FRUptspp, GALTptspp, GAMptspp, GLCptspp, HXAND, LDH_D, MALTptspp, MANGLYCptspp, MANptspp, MNLptspp, SBTptspp, SUCptspp, TREptspp, XAND
705	-54.8261	EX_succ_e	10.8056	-10	0.0694611	4	31.7019	-5.75177	27.0716	-3.75903	8.38941	b2415, b3732, b2867, b1380	2DGLCptspp, ACGAptspp, ACMANAptspp, ACMUMptspp, ARBTptspp, ASCBptspp, ATPS4rpp, CELBpts, CHTBSptspp, DHAPT, FRUpts2pp, FRUptspp, GALTptspp, GAMptspp, GLCptspp, HXAND, LDH_D, MALTptspp, MANGLYCptspp, MANptspp, MNLptspp, SBTptspp, SUCptspp, TREptspp, XAND
706	-54.8261	EX_succ_e	10.8056	-10	0.0694611	4	31.7019	-5.75177	27.0716	-3.75903	8.38941	b2415, b3736, b2866, b1380	2DGLCptspp, ACGAptspp, ACMANAptspp, ACMUMptspp, ARBTptspp, ASCBptspp, ATPS4rpp, CELBpts, CHTBSptspp, DHAPT, FRUpts2pp, FRUptspp, GALTptspp, GAMptspp, GLCptspp, HXAND, LDH_D, MALTptspp, MANGLYCptspp, MANptspp, MNLptspp, SBTptspp, SUCptspp, TREptspp, XAND
707	-54.8261	EX_succ_e	10.8056	-10	0.0694611	4	31.7019	-5.75177	27.0716	-3.75903	8.38941	b2415, b3736, b2867, b1380	2DGLCptspp, ACGAptspp, ACMANAptspp, ACMUMptspp, ARBTptspp, ASCBptspp, ATPS4rpp, CELBpts, CHTBSptspp, DHAPT, FRUpts2pp, FRUptspp, GALTptspp, GAMptspp, GLCptspp, HXAND, LDH_D, MALTptspp, MANGLYCptspp, MANptspp, MNLptspp, SBTptspp, SUCptspp, TREptspp, XAND
708	-54.8261	EX_succ_e	10.8056	-10	0.0694611	4	31.7019	-5.75177	27.0716	-3.75903	8.38941	b2415, b3732, b2868, b1380	2DGLCptspp, ACGAptspp, ACMANAptspp, ACMUMptspp, ARBTptspp, ASCBptspp, ATPS4rpp, CELBpts, CHTBSptspp, DHAPT, FRUpts2pp, FRUptspp, GALTptspp, GAMptspp, GLCptspp, HXAND, LDH_D, MALTptspp, MANGLYCptspp, MANptspp, MNLptspp, SBTptspp, SUCptspp, TREptspp, XAND
709	-54.8261	EX_succ_e	10.8056	-10	0.0694611	4	31.7019	-5.75177	27.0716	-3.75903	8.38941	b2415, b3736, b2868, b1380	2DGLCptspp, ACGAptspp, ACMANAptspp, ACMUMptspp, ARBTptspp, ASCBptspp, ATPS4rpp, CELBpts, CHTBSptspp, DHAPT, FRUpts2pp, FRUptspp, GALTptspp, GAMptspp, GLCptspp, HXAND, LDH_D, MALTptspp, MANGLYCptspp, MANptspp, MNLptspp, SBTptspp, SUCptspp, TREptspp, XAND
710	-54.8261	EX_succ_e	10.8056	-10	0.0694611	4	31.7019	-5.75177	27.0716	-3.75903	8.38941	b2415, b3732, b1380, b2175	2DGLCptspp, 4PCPpp, ACGAptspp, ACMANAptspp, ACMUMptspp, AGM4PCPpp, ARBTptspp, ASCBptspp, ATPS4rpp, CELBpts, CHTBSptspp, DHAPT, FRUpts2pp, FRUptspp, GALTptspp, GAMptspp, GLCptspp, LDH_D, MALTptspp, MANGLYCptspp, MANptspp, MNLptspp, SBTptspp, SUCptspp, TREptspp
711	-54.8261	EX_succ_e	10.8056	-10	0.0694611	4	31.7019	-5.75177	27.0716	-3.75903	8.38941	b2415, b3736, b1380, b2175	2DGLCptspp, 4PCPpp, ACGAptspp, ACMANAptspp, ACMUMptspp, AGM4PCPpp, ARBTptspp, ASCBptspp, ATPS4rpp, CELBpts, CHTBSptspp, DHAPT, FRUpts2pp, FRUptspp, GALTptspp, GAMptspp, GLCptspp, LDH_D, MALTptspp, MANGLYCptspp, MANptspp, MNLptspp, SBTptspp, SUCptspp, TREptspp
712	-54.8261	EX_succ_e	10.8056	-10	0.0694611	4	31.7019	-5.75177	27.0716	-3.75903	8.38941	b2415, b0411, b3732, b1380	2DGLCptspp, ACGAptspp, ACMANAptspp, ACMUMptspp, ADNtex, ARBTptspp, ASCBptspp, ATPS4rpp, CELBpts, CHTBSptspp, DADNtex, DCYTtex, DHAPT, DURItex, FRUpts2pp, FRUptspp, GALTptspp, GAMptspp, GLCptspp, GUAtex, INStex, LDH_D, MALTptspp, MANGLYCptspp, MANptspp, MNLptspp, SBTptspp, SUCptspp, TREptspp, URItex
713	-54.8261	EX_succ_e	10.8056	-10	0.0694611	4	31.7019	-5.75177	27.0716	-3.75903	8.38941	b2415, b0411, b3736, b1380	2DGLCptspp, ACGAptspp, ACMANAptspp, ACMUMptspp, ADNtex, ARBTptspp, ASCBptspp, ATPS4rpp, CELBpts, CHTBSptspp, DADNtex, DCYTtex, DHAPT, DURItex, FRUpts2pp, FRUptspp, GALTptspp, GAMptspp, GLCptspp, GUAtex, INStex, LDH_D, MALTptspp, MANGLYCptspp, MANptspp, MNLptspp, SBTptspp, SUCptspp, TREptspp, URItex
714	-54.8261	EX_succ_e	10.8056	-10	0.0694611	4	31.7019	-5.75177	27.0716	-3.75903	8.38941	b2415, b3736, b1380, b1396	2DGLCptspp, ACGAptspp, ACMANAptspp, ACMUMptspp, ARBTptspp, ASCBptspp, ATPS4rpp, CELBpts, CHTBSptspp, DHAPT, FRUpts2pp, FRUptspp, GALTptspp, GAMptspp, GLCptspp, HPACOAT, LDH_D, MALTptspp, MANGLYCptspp, MANptspp, MNLptspp, PACOAT, SBTptspp, SUCptspp, TREptspp
715	-54.8261	EX_succ_e	10.8056	-10	0.0694611	4	31.7019	-5.75177	27.0716	-3.75903	8.38941	b2415, b3732, b1380, b1396	2DGLCptspp, ACGAptspp, ACMANAptspp, ACMUMptspp, ARBTptspp, ASCBptspp, ATPS4rpp, CELBpts, CHTBSptspp, DHAPT, FRUpts2pp, FRUptspp, GALTptspp, GAMptspp, GLCptspp, HPACOAT, LDH_D, MALTptspp, MANGLYCptspp, MANptspp, MNLptspp, PACOAT, SBTptspp, SUCptspp, TREptspp
716	-54.8261	EX_succ_e	10.8056	-10	0.0694611	4	31.7019	-5.75177	27.0716	-3.75903	8.38941	b2415, b2587, b3736, b1380	2DGLCptspp, ACGAptspp, ACMANAptspp, ACMUMptspp, AKGt2rpp, ARBTptspp, ASCBptspp, ATPS4rpp, CELBpts, CHTBSptspp, DHAPT, FRUpts2pp, FRUptspp, GALTptspp, GAMptspp, GLCptspp, LDH_D, MALTptspp, MANGLYCptspp, MANptspp, MNLptspp, SBTptspp, SUCptspp, TREptspp
717	-54.8261	EX_succ_e	10.8056	-10	0.0694611	4	31.7019	-5.75177	27.0716	-3.75903	8.38941	b2415, b2587, b3732, b1380	2DGLCptspp, ACGAptspp, ACMANAptspp, ACMUMptspp, AKGt2rpp, ARBTptspp, ASCBptspp, ATPS4rpp, CELBpts, CHTBSptspp, DHAPT, FRUpts2pp, FRUptspp, GALTptspp, GAMptspp, GLCptspp, LDH_D, MALTptspp, MANGLYCptspp, MANptspp, MNLptspp, SBTptspp, SUCptspp, TREptspp
718	-54.8261	EX_succ_e	10.8056	-10	0.0694611	4	31.7019	-5.75177	27.0716	-3.75903	8.38941	b2415, b3732, b1380, b1813	2DGLCptspp, ACGAptspp, ACMANAptspp, ACMUMptspp, ARBTptspp, ASCBptspp, ATPS4rpp, CELBpts, CHTBSptspp, DHAPT, FRUpts2pp, FRUptspp, GALTptspp, GAMptspp, GLCptspp, HPYRP, LDH_D, MALTptspp, MANGLYCptspp, MANptspp, MNLptspp, SBTptspp, SUCptspp, TREptspp
719	-54.8261	EX_succ_e	10.8056	-10	0.0694611	4	31.7019	-5.75177	27.0716	-3.75903	8.38941	b2415, b3736, b1380, b1813	2DGLCptspp, ACGAptspp, ACMANAptspp, ACMUMptspp, ARBTptspp, ASCBptspp, ATPS4rpp, CELBpts, CHTBSptspp, DHAPT, FRUpts2pp, FRUptspp, GALTptspp, GAMptspp, GLCptspp, HPYRP, LDH_D, MALTptspp, MANGLYCptspp, MANptspp, MNLptspp, SBTptspp, SUCptspp, TREptspp
720	-54.8261	EX_succ_e	10.8056	-10	0.0694611	4	31.7019	-5.75177	27.0716	-3.75903	8.38941	b1702, b2415, b3732, b1380	2DGLCptspp, ACGAptspp, ACMANAptspp, ACMUMptspp, ARBTptspp, ASCBptspp, ATPS4rpp, CELBpts, CHTBSptspp, DHAPT, FRUpts2pp, FRUptspp, GALTptspp, GAMptspp, GLCptspp, LDH_D, MALTptspp, MANGLYCptspp, MANptspp, MNLptspp, PPS, SBTptspp, SUCptspp, TREptspp
721	-54.8261	EX_succ_e	10.8056	-10	0.0694611	4	31.7019	-5.75177	27.0716	-3.75903	8.38941	b1702, b2415, b3736, b1380	2DGLCptspp, ACGAptspp, ACMANAptspp, ACMUMptspp, ARBTptspp, ASCBptspp, ATPS4rpp, CELBpts, CHTBSptspp, DHAPT, FRUpts2pp, FRUptspp, GALTptspp, GAMptspp, GLCptspp, LDH_D, MALTptspp, MANGLYCptspp, MANptspp, MNLptspp, PPS, SBTptspp, SUCptspp, TREptspp
722	-54.8261	EX_succ_e	10.8056	-10	0.0694611	4	31.7019	-5.75177	27.0716	-3.75903	8.38941	b2415, b3732, b1380, b1090	2DGLCptspp, ACGAptspp, ACMANAptspp, ACMUMptspp, ACPPAT120, ACPPAT140, ACPPAT141, ACPPAT160, ACPPAT161, ACPPAT180, ACPPAT181, ARBTptspp, ASCBptspp, ATPS4rpp, CELBpts, CHTBSptspp, DHAPT, FRUpts2pp, FRUptspp, GALTptspp, GAMptspp, GLCptspp, LDH_D, MALTptspp, MANGLYCptspp, MANptspp, MNLptspp, SBTptspp, SUCptspp, TREptspp
723	-54.8261	EX_succ_e	10.8056	-10	0.0694611	4	31.7019	-5.75177	27.0716	-3.75903	8.38941	b2415, b3736, b1380, b1090	2DGLCptspp, ACGAptspp, ACMANAptspp, ACMUMptspp, ACPPAT120, ACPPAT140, ACPPAT141, ACPPAT160, ACPPAT161, ACPPAT180, ACPPAT181, ARBTptspp, ASCBptspp, ATPS4rpp, CELBpts, CHTBSptspp, DHAPT, FRUpts2pp, FRUptspp, GALTptspp, GAMptspp, GLCptspp, LDH_D, MALTptspp, MANGLYCptspp, MANptspp, MNLptspp, SBTptspp, SUCptspp, TREptspp
724	-54.8261	EX_succ_e	10.8056	-10	0.0694611	4	31.7019	-5.75177	27.0716	-3.75903	8.38941	b1855, b2415, b3732, b1380	2DGLCptspp, ACGAptspp, ACMANAptspp, ACMUMptspp, ARBTptspp, ASCBptspp, ATPS4rpp, CELBpts, CHTBSptspp, DHAPT, EDTXS2, EDTXS4, FRUpts2pp, FRUptspp, GALTptspp, GAMptspp, GLCptspp, LDH_D, MALTptspp, MANGLYCptspp, MANptspp, MNLptspp, SBTptspp, SUCptspp, TREptspp
725	-54.8261	EX_succ_e	10.8056	-10	0.0694611	4	31.7019	-5.75177	27.0716	-3.75903	8.38941	b1855, b2415, b3736, b1380	2DGLCptspp, ACGAptspp, ACMANAptspp, ACMUMptspp, ARBTptspp, ASCBptspp, ATPS4rpp, CELBpts, CHTBSptspp, DHAPT, EDTXS2, EDTXS4, FRUpts2pp, FRUptspp, GALTptspp, GAMptspp, GLCptspp, LDH_D, MALTptspp, MANGLYCptspp, MANptspp, MNLptspp, SBTptspp, SUCptspp, TREptspp
726	-54.8261	EX_succ_e	10.8056	-10	0.0694611	4	31.7019	-5.75177	27.0716	-3.75903	8.38941	b2415, b3732, b1380, b0968	2DGLCptspp, ACGAptspp, ACMANAptspp, ACMUMptspp, APH120, APH140, APH141, APH160, APH161, APH180, APH181, ARBTptspp, ASCBptspp, ATPS4rpp, CELBpts, CHTBSptspp, DHAPT, FRUpts2pp, FRUptspp, GALTptspp, GAMptspp, GLCptspp, LDH_D, MALTptspp, MANGLYCptspp, MANptspp, MNLptspp, SBTptspp, SUCptspp, TREptspp
727	-54.8261	EX_succ_e	10.8056	-10	0.0694611	4	31.7019	-5.75177	27.0716	-3.75903	8.38941	b2415, b3736, b1380, b0968	2DGLCptspp, ACGAptspp, ACMANAptspp, ACMUMptspp, APH120, APH140, APH141, APH160, APH161, APH180, APH181, ARBTptspp, ASCBptspp, ATPS4rpp, CELBpts, CHTBSptspp, DHAPT, FRUpts2pp, FRUptspp, GALTptspp, GAMptspp, GLCptspp, LDH_D, MALTptspp, MANGLYCptspp, MANptspp, MNLptspp, SBTptspp, SUCptspp, TREptspp
728	-54.8261	EX_succ_e	10.8056	-10	0.0694611	4	31.7019	-5.75177	27.0716	-3.75903	8.38941	b2415, b3732, b4067, b1380	2DGLCptspp, ACGAptspp, ACMANAptspp, ACMUMptspp, ACt4pp, ARBTptspp, ASCBptspp, ATPS4rpp, CELBpts, CHTBSptspp, DHAPT, FRUpts2pp, FRUptspp, GALTptspp, GAMptspp, GLCptspp, GLYCLTt4pp, LDH_D, MALTptspp, MANGLYCptspp, MANptspp, MNLptspp, SBTptspp, SUCptspp, TREptspp
729	-54.8261	EX_succ_e	10.8056	-10	0.0694611	4	31.7019	-5.75177	27.0716	-3.75903	8.38941	b2415, b3736, b4067, b1380	2DGLCptspp, ACGAptspp, ACMANAptspp, ACMUMptspp, ACt4pp, ARBTptspp, ASCBptspp, ATPS4rpp, CELBpts, CHTBSptspp, DHAPT, FRUpts2pp, FRUptspp, GALTptspp, GAMptspp, GLCptspp, GLYCLTt4pp, LDH_D, MALTptspp, MANGLYCptspp, MANptspp, MNLptspp, SBTptspp, SUCptspp, TREptspp
730	-54.8261	EX_succ_e	10.8056	-10	0.0694611	4	31.7019	-5.75177	27.0716	-3.75903	8.38941	b2415, b3736, b3469, b1380	2DGLCptspp, ACGAptspp, ACMANAptspp, ACMUMptspp, ARBTptspp, ASCBptspp, ATPS4rpp, CD2abcpp, CELBpts, CHTBSptspp, COBALT2abcpp, CU2abcpp, DHAPT, FRUpts2pp, FRUptspp, GALTptspp, GAMptspp, GLCptspp, HG2abcpp, LDH_D, MALTptspp, MANGLYCptspp, MANptspp, MNLptspp, NI2abcpp, SBTptspp, SUCptspp, TREptspp, ZN2abcpp
731	-54.8261	EX_succ_e	10.8056	-10	0.0694611	4	31.7019	-5.75177	27.0716	-3.75903	8.38941	b2415, b2132, b3732, b1380	2DGLCptspp, ACGAptspp, ACMANAptspp, ACMUMptspp, ARBTptspp, ASCBptspp, ATPS4rpp, CELBpts, CHTBSptspp, DHAPT, FRUpts2pp, FRUptspp, GALTptspp, GAMptspp, GLCptspp, LACZpp, LDH_D, MALTptspp, MANGLYCptspp, MANptspp, MNLptspp, SBTptspp, SUCptspp, TREptspp
732	-54.8261	EX_succ_e	10.8056	-10	0.0694611	4	31.7019	-5.75177	27.0716	-3.75903	8.38941	b2415, b2132, b3736, b1380	2DGLCptspp, ACGAptspp, ACMANAptspp, ACMUMptspp, ARBTptspp, ASCBptspp, ATPS4rpp, CELBpts, CHTBSptspp, DHAPT, FRUpts2pp, FRUptspp, GALTptspp, GAMptspp, GLCptspp, LACZpp, LDH_D, MALTptspp, MANGLYCptspp, MANptspp, MNLptspp, SBTptspp, SUCptspp, TREptspp
733	-54.8261	EX_succ_e	10.8056	-10	0.0694611	4	31.7019	-5.75177	27.0716	-3.75903	8.38941	b1982, b2415, b3736, b1380	2DGLCptspp, ACGAptspp, ACMANAptspp, ACMUMptspp, AMPN, ARBTptspp, ASCBptspp, ATPS4rpp, CELBpts, CHTBSptspp, DHAPT, FRUpts2pp, FRUptspp, GALTptspp, GAMptspp, GLCptspp, LDH_D, MALTptspp, MANGLYCptspp, MANptspp, MNLptspp, SBTptspp, SUCptspp, TREptspp
734	-54.8261	EX_succ_e	10.8056	-10	0.0694611	4	31.7019	-5.75177	27.0716	-3.75903	8.38941	b1982, b2415, b3732, b1380	2DGLCptspp, ACGAptspp, ACMANAptspp, ACMUMptspp, AMPN, ARBTptspp, ASCBptspp, ATPS4rpp, CELBpts, CHTBSptspp, DHAPT, FRUpts2pp, FRUptspp, GALTptspp, GAMptspp, GLCptspp, LDH_D, MALTptspp, MANGLYCptspp, MANptspp, MNLptspp, SBTptspp, SUCptspp, TREptspp
735	-54.8261	EX_succ_e	10.8056	-10	0.0694611	4	31.7019	-5.75177	27.0716	-3.75903	8.38941	b0238, b2415, b3732, b1380	2DGLCptspp, ACGAptspp, ACMANAptspp, ACMUMptspp, ARBTptspp, ASCBptspp, ATPS4rpp, CELBpts, CHTBSptspp, DHAPT, FRUpts2pp, FRUptspp, GALTptspp, GAMptspp, GLCptspp, LDH_D, MALTptspp, MANGLYCptspp, MANptspp, MNLptspp, SBTptspp, SUCptspp, TREptspp, XPPT
736	-54.8261	EX_succ_e	10.8056	-10	0.0694611	4	31.7019	-5.75177	27.0716	-3.75903	8.38941	b0238, b2415, b3736, b1380	2DGLCptspp, ACGAptspp, ACMANAptspp, ACMUMptspp, ARBTptspp, ASCBptspp, ATPS4rpp, CELBpts, CHTBSptspp, DHAPT, FRUpts2pp, FRUptspp, GALTptspp, GAMptspp, GLCptspp, LDH_D, MALTptspp, MANGLYCptspp, MANptspp, MNLptspp, SBTptspp, SUCptspp, TREptspp, XPPT
737	-54.8261	EX_succ_e	10.8056	-10	0.0694611	4	31.7019	-5.75177	27.0716	-3.75903	8.38941	b0312, b2415, b3732, b1380	2DGLCptspp, ACGAptspp, ACMANAptspp, ACMUMptspp, ARBTptspp, ASCBptspp, ATPS4rpp, BETALDHx, BETALDHy, CELBpts, CHTBSptspp, DHAPT, FRUpts2pp, FRUptspp, GALTptspp, GAMptspp, GLCptspp, LDH_D, MALTptspp, MANGLYCptspp, MANptspp, MNLptspp, SBTptspp, SUCptspp, TREptspp
738	-54.8261	EX_succ_e	10.8056	-10	0.0694611	4	31.7019	-5.75177	27.0716	-3.75903	8.38941	b0312, b2415, b3736, b1380	2DGLCptspp, ACGAptspp, ACMANAptspp, ACMUMptspp, ARBTptspp, ASCBptspp, ATPS4rpp, BETALDHx, BETALDHy, CELBpts, CHTBSptspp, DHAPT, FRUpts2pp, FRUptspp, GALTptspp, GAMptspp, GLCptspp, LDH_D, MALTptspp, MANGLYCptspp, MANptspp, MNLptspp, SBTptspp, SUCptspp, TREptspp
739	-54.8261	EX_succ_e	10.8056	-10	0.0694611	4	31.7019	-5.75177	27.0716	-3.75903	8.38941	b2415, b0311, b3736, b1380	2DGLCptspp, ACGAptspp, ACMANAptspp, ACMUMptspp, ARBTptspp, ASCBptspp, ATPS4rpp, CELBpts, CHOLD, CHTBSptspp, DHAPT, FRUpts2pp, FRUptspp, GALTptspp, GAMptspp, GLCptspp, LDH_D, MALTptspp, MANGLYCptspp, MANptspp, MNLptspp, SBTptspp, SUCptspp, TREptspp
740	-54.8261	EX_succ_e	10.8056	-10	0.0694611	4	31.7019	-5.75177	27.0716	-3.75903	8.38941	b2415, b3732, b1380, b2467	2DGLCptspp, ACGAptspp, ACMANAptspp, ACMUMptspp, ARBTptspp, ASCBptspp, ATPS4rpp, CELBpts, CHTBSptspp, DHAPT, FRUpts2pp, FRUptspp, GALTptspp, GAMptspp, GDPMNP, GLCptspp, LDH_D, MALTptspp, MANGLYCptspp, MANptspp, MNLptspp, SBTptspp, SUCptspp, TREptspp
741	-54.8261	EX_succ_e	10.8056	-10	0.0694611	4	31.7019	-5.75177	27.0716	-3.75903	8.38941	b2415, b3736, b1380, b2467	2DGLCptspp, ACGAptspp, ACMANAptspp, ACMUMptspp, ARBTptspp, ASCBptspp, ATPS4rpp, CELBpts, CHTBSptspp, DHAPT, FRUpts2pp, FRUptspp, GALTptspp, GAMptspp, GDPMNP, GLCptspp, LDH_D, MALTptspp, MANGLYCptspp, MANptspp, MNLptspp, SBTptspp, SUCptspp, TREptspp
742	-54.8261	EX_succ_e	10.8056	-10	0.0694611	4	31.7019	-5.75177	27.0716	-3.75903	8.38941	b1238, b2415, b3736, b1380	2DGLCptspp, ACGAptspp, ACMANAptspp, ACMUMptspp, ARBTptspp, ASCBptspp, ATPS4rpp, CELBpts, CHTBSptspp, DHAPT, DURIK1, FRUpts2pp, FRUptspp, GALTptspp, GAMptspp, GLCptspp, LDH_D, MALTptspp, MANGLYCptspp, MANptspp, MNLptspp, SBTptspp, SUCptspp, TMDK1, TREptspp
743	-54.8261	EX_succ_e	10.8056	-10	0.0694611	4	31.7019	-5.75177	27.0716	-3.75903	8.38941	b1238, b2415, b3732, b1380	2DGLCptspp, ACGAptspp, ACMANAptspp, ACMUMptspp, ARBTptspp, ASCBptspp, ATPS4rpp, CELBpts, CHTBSptspp, DHAPT, DURIK1, FRUpts2pp, FRUptspp, GALTptspp, GAMptspp, GLCptspp, LDH_D, MALTptspp, MANGLYCptspp, MANptspp, MNLptspp, SBTptspp, SUCptspp, TMDK1, TREptspp
744	-54.8261	EX_succ_e	10.8056	-10	0.0694611	4	31.7019	-5.75177	27.0716	-3.75903	8.38941	b2415, b3736, b1380, b0118	2DGLCptspp, ACGAptspp, ACMANAptspp, ACMUMptspp, ARBTptspp, ASCBptspp, ATPS4rpp, CELBpts, CHTBSptspp, DHAPT, FRUpts2pp, FRUptspp, GALTptspp, GAMptspp, GLCptspp, LDH_D, MALTptspp, MANGLYCptspp, MANptspp, MICITDr, MNLptspp, SBTptspp, SUCptspp, TREptspp
745	-54.8261	EX_succ_e	10.8056	-10	0.0694611	4	31.7019	-5.75177	27.0716	-3.75903	8.38941	b2415, b0333, b3732, b1380	2DGLCptspp, ACGAptspp, ACMANAptspp, ACMUMptspp, ARBTptspp, ASCBptspp, ATPS4rpp, CELBpts, CHTBSptspp, DHAPT, FRUpts2pp, FRUptspp, GALTptspp, GAMptspp, GLCptspp, LDH_D, MALTptspp, MANGLYCptspp, MANptspp, MCITS, MNLptspp, SBTptspp, SUCptspp, TREptspp
746	-54.8261	EX_succ_e	10.8056	-10	0.0694611	4	31.7019	-5.75177	27.0716	-3.75903	8.38941	b2415, b0333, b3736, b1380	2DGLCptspp, ACGAptspp, ACMANAptspp, ACMUMptspp, ARBTptspp, ASCBptspp, ATPS4rpp, CELBpts, CHTBSptspp, DHAPT, FRUpts2pp, FRUptspp, GALTptspp, GAMptspp, GLCptspp, LDH_D, MALTptspp, MANGLYCptspp, MANptspp, MCITS, MNLptspp, SBTptspp, SUCptspp, TREptspp
747	-54.8261	EX_succ_e	10.8056	-10	0.0694611	4	31.7019	-5.75177	27.0716	-3.75903	8.38941	b2415, b0331, b3732, b1380	2DGLCptspp, ACGAptspp, ACMANAptspp, ACMUMptspp, ARBTptspp, ASCBptspp, ATPS4rpp, CELBpts, CHTBSptspp, DHAPT, FRUpts2pp, FRUptspp, GALTptspp, GAMptspp, GLCptspp, LDH_D, MALTptspp, MANGLYCptspp, MANptspp, MCITL2, MNLptspp, SBTptspp, SUCptspp, TREptspp
748	-54.8261	EX_succ_e	10.8056	-10	0.0694611	4	31.7019	-5.75177	27.0716	-3.75903	8.38941	b2415, b0331, b3736, b1380	2DGLCptspp, ACGAptspp, ACMANAptspp, ACMUMptspp, ARBTptspp, ASCBptspp, ATPS4rpp, CELBpts, CHTBSptspp, DHAPT, FRUpts2pp, FRUptspp, GALTptspp, GAMptspp, GLCptspp, LDH_D, MALTptspp, MANGLYCptspp, MANptspp, MCITL2, MNLptspp, SBTptspp, SUCptspp, TREptspp
749	-54.8261	EX_succ_e	10.8056	-10	0.0694611	4	31.7019	-5.75177	27.0716	-3.75903	8.38941	b2415, b3732, b0334, b1380	2DGLCptspp, ACGAptspp, ACMANAptspp, ACMUMptspp, ARBTptspp, ASCBptspp, ATPS4rpp, CELBpts, CHTBSptspp, DHAPT, FRUpts2pp, FRUptspp, GALTptspp, GAMptspp, GLCptspp, LDH_D, MALTptspp, MANGLYCptspp, MANptspp, MCITD, MNLptspp, SBTptspp, SUCptspp, TREptspp
750	-54.8261	EX_succ_e	10.8056	-10	0.0694611	4	31.7019	-5.75177	27.0716	-3.75903	8.38941	b2415, b3732, b1380, b0118	2DGLCptspp, ACGAptspp, ACMANAptspp, ACMUMptspp, ARBTptspp, ASCBptspp, ATPS4rpp, CELBpts, CHTBSptspp, DHAPT, FRUpts2pp, FRUptspp, GALTptspp, GAMptspp, GLCptspp, LDH_D, MALTptspp, MANGLYCptspp, MANptspp, MICITDr, MNLptspp, SBTptspp, SUCptspp, TREptspp
751	-54.8261	EX_succ_e	10.8056	-10	0.0694611	4	31.7019	-5.75177	27.0716	-3.75903	8.38941	b2415, b3736, b2260, b1380	2DGLCptspp, ACGAptspp, ACMANAptspp, ACMUMptspp, ARBTptspp, ASCBptspp, ATPS4rpp, CELBpts, CHTBSptspp, DHAPT, FRUpts2pp, FRUptspp, GALTptspp, GAMptspp, GLCptspp, LDH_D, MALTptspp, MANGLYCptspp, MANptspp, MNLptspp, SBTptspp, SUCBZL, SUCptspp, TREptspp
752	-54.8261	EX_succ_e	10.8056	-10	0.0694611	4	31.7019	-5.75177	27.0716	-3.75903	8.38941	b2415, b3736, b1380, b2262	2DGLCptspp, ACGAptspp, ACMANAptspp, ACMUMptspp, ARBTptspp, ASCBptspp, ATPS4rpp, CELBpts, CHTBSptspp, DHAPT, DHNCOAS, FRUpts2pp, FRUptspp, GALTptspp, GAMptspp, GLCptspp, LDH_D, MALTptspp, MANGLYCptspp, MANptspp, MNLptspp, SBTptspp, SUCptspp, TREptspp
753	-54.8261	EX_succ_e	10.8056	-10	0.0694611	4	31.7019	-5.75177	27.0716	-3.75903	8.38941	b2415, b3732, b1380, b2263	2DGLCptspp, ACGAptspp, ACMANAptspp, ACMUMptspp, ARBTptspp, ASCBptspp, ATPS4rpp, CELBpts, CHTBSptspp, DHAPT, FRUpts2pp, FRUptspp, GALTptspp, GAMptspp, GLCptspp, LDH_D, MALTptspp, MANGLYCptspp, MANptspp, MNLptspp, SBTptspp, SHCHCS3, SUCptspp, TREptspp
754	-54.8261	EX_succ_e	10.8056	-10	0.0694611	4	31.7019	-5.75177	27.0716	-3.75903	8.38941	b2415, b3732, b1380, b1686	2DGLCptspp, ACGAptspp, ACMANAptspp, ACMUMptspp, ARBTptspp, ASCBptspp, ATPS4rpp, CELBpts, CHTBSptspp, DHAPT, DHNCOAT, FRUpts2pp, FRUptspp, GALTptspp, GAMptspp, GLCptspp, LDH_D, MALTptspp, MANGLYCptspp, MANptspp, MNLptspp, SBTptspp, SUCptspp, TREptspp
755	-54.8261	EX_succ_e	10.8056	-10	0.0694611	4	31.7019	-5.75177	27.0716	-3.75903	8.38941	b2415, b3736, b1380, b2263	2DGLCptspp, ACGAptspp, ACMANAptspp, ACMUMptspp, ARBTptspp, ASCBptspp, ATPS4rpp, CELBpts, CHTBSptspp, DHAPT, FRUpts2pp, FRUptspp, GALTptspp, GAMptspp, GLCptspp, LDH_D, MALTptspp, MANGLYCptspp, MANptspp, MNLptspp, SBTptspp, SHCHCS3, SUCptspp, TREptspp
756	-54.8261	EX_succ_e	10.8056	-10	0.0694611	4	31.7019	-5.75177	27.0716	-3.75903	8.38941	b2415, b3732, b1380, b2264	2DGLCptspp, ACGAptspp, ACMANAptspp, ACMUMptspp, ARBTptspp, ASCBptspp, ATPS4rpp, CELBpts, CHTBSptspp, DHAPT, FRUpts2pp, FRUptspp, GALTptspp, GAMptspp, GLCptspp, LDH_D, MALTptspp, MANGLYCptspp, MANptspp, MNLptspp, SBTptspp, SEPHCHCS, SUCptspp, TREptspp
757	-54.8261	EX_succ_e	10.8056	-10	0.0694611	4	31.7019	-5.75177	27.0716	-3.75903	8.38941	b2415, b3736, b1380, b1686	2DGLCptspp, ACGAptspp, ACMANAptspp, ACMUMptspp, ARBTptspp, ASCBptspp, ATPS4rpp, CELBpts, CHTBSptspp, DHAPT, DHNCOAT, FRUpts2pp, FRUptspp, GALTptspp, GAMptspp, GLCptspp, LDH_D, MALTptspp, MANGLYCptspp, MANptspp, MNLptspp, SBTptspp, SUCptspp, TREptspp
758	-54.8261	EX_succ_e	10.8056	-10	0.0694611	4	31.7019	-5.75177	27.0716	-3.75903	8.38941	b2415, b2261, b3736, b1380	2DGLCptspp, ACGAptspp, ACMANAptspp, ACMUMptspp, ARBTptspp, ASCBptspp, ATPS4rpp, CELBpts, CHTBSptspp, DHAPT, FRUpts2pp, FRUptspp, GALTptspp, GAMptspp, GLCptspp, LDH_D, MALTptspp, MANGLYCptspp, MANptspp, MNLptspp, SBTptspp, SUCBZS, SUCptspp, TREptspp
759	-54.8261	EX_succ_e	10.8056	-10	0.0694611	4	31.7019	-5.75177	27.0716	-3.75903	8.38941	b2415, b3736, b1380, b2264	2DGLCptspp, ACGAptspp, ACMANAptspp, ACMUMptspp, ARBTptspp, ASCBptspp, ATPS4rpp, CELBpts, CHTBSptspp, DHAPT, FRUpts2pp, FRUptspp, GALTptspp, GAMptspp, GLCptspp, LDH_D, MALTptspp, MANGLYCptspp, MANptspp, MNLptspp, SBTptspp, SEPHCHCS, SUCptspp, TREptspp
760	-54.8261	EX_succ_e	10.8056	-10	0.0694611	4	31.7019	-5.75177	27.0716	-3.75903	8.38941	b2415, b3732, b1380, b3930	2DGLCptspp, ACGAptspp, ACMANAptspp, ACMUMptspp, ARBTptspp, ASCBptspp, ATPS4rpp, CELBpts, CHTBSptspp, DHAPT, DHNAOT4, FRUpts2pp, FRUptspp, GALTptspp, GAMptspp, GLCptspp, LDH_D, MALTptspp, MANGLYCptspp, MANptspp, MNLptspp, SBTptspp, SUCptspp, TREptspp
761	-54.8261	EX_succ_e	10.8056	-10	0.0694611	4	31.7019	-5.75177	27.0716	-3.75903	8.38941	b2415, b3736, b1380, b3930	2DGLCptspp, ACGAptspp, ACMANAptspp, ACMUMptspp, ARBTptspp, ASCBptspp, ATPS4rpp, CELBpts, CHTBSptspp, DHAPT, DHNAOT4, FRUpts2pp, FRUptspp, GALTptspp, GAMptspp, GLCptspp, LDH_D, MALTptspp, MANGLYCptspp, MANptspp, MNLptspp, SBTptspp, SUCptspp, TREptspp
762	-54.8261	EX_succ_e	10.8056	-10	0.0694611	4	31.7019	-5.75177	27.0716	-3.75903	8.38941	b2415, b3732, b2260, b1380	2DGLCptspp, ACGAptspp, ACMANAptspp, ACMUMptspp, ARBTptspp, ASCBptspp, ATPS4rpp, CELBpts, CHTBSptspp, DHAPT, FRUpts2pp, FRUptspp, GALTptspp, GAMptspp, GLCptspp, LDH_D, MALTptspp, MANGLYCptspp, MANptspp, MNLptspp, SBTptspp, SUCBZL, SUCptspp, TREptspp
763	-54.8261	EX_succ_e	10.8056	-10	0.0694611	4	31.7019	-5.75177	27.0716	-3.75903	8.38941	b2784, b2415, b3732, b1380	2DGLCptspp, ACGAptspp, ACMANAptspp, ACMUMptspp, ARBTptspp, ASCBptspp, ATPS4rpp, CELBpts, CHTBSptspp, DHAPT, FRUpts2pp, FRUptspp, GALTptspp, GAMptspp, GLCptspp, GTPDPK, LDH_D, MALTptspp, MANGLYCptspp, MANptspp, MNLptspp, SBTptspp, SUCptspp, TREptspp
764	-54.8261	EX_succ_e	10.8056	-10	0.0694611	4	31.7019	-5.75177	27.0716	-3.75903	8.38941	b4322, b2415, b3736, b1380	2DGLCptspp, ACGAptspp, ACMANAptspp, ACMUMptspp, ARBTptspp, ASCBptspp, ATPS4rpp, CELBpts, CHTBSptspp, DHAPT, FRUpts2pp, FRUptspp, GALTptspp, GAMptspp, GLCptspp, LDH_D, MALTptspp, MANGLYCptspp, MANptspp, MNLptspp, MNNH, SBTptspp, SUCptspp, TREptspp
765	-54.8261	EX_succ_e	10.8056	-10	0.0694611	4	31.7019	-5.75177	27.0716	-3.75903	8.38941	b2415, b4323, b3732, b1380	2DGLCptspp, ACGAptspp, ACMANAptspp, ACMUMptspp, ARBTptspp, ASCBptspp, ATPS4rpp, CELBpts, CHTBSptspp, DHAPT, FRUpts2pp, FRUptspp, GALTptspp, GAMptspp, GLCptspp, LDH_D, MALTptspp, MANAO, MANGLYCptspp, MANptspp, MNLptspp, SBTptspp, SUCptspp, TREptspp
766	-54.8261	EX_succ_e	10.8056	-10	0.0694611	4	31.7019	-5.75177	27.0716	-3.75903	8.38941	b2415, b4323, b3736, b1380	2DGLCptspp, ACGAptspp, ACMANAptspp, ACMUMptspp, ARBTptspp, ASCBptspp, ATPS4rpp, CELBpts, CHTBSptspp, DHAPT, FRUpts2pp, FRUptspp, GALTptspp, GAMptspp, GLCptspp, LDH_D, MALTptspp, MANAO, MANGLYCptspp, MANptspp, MNLptspp, SBTptspp, SUCptspp, TREptspp
767	-54.8261	EX_succ_e	10.8056	-10	0.0694611	4	31.7019	-5.75177	27.0716	-3.75903	8.38941	b4322, b2415, b3732, b1380	2DGLCptspp, ACGAptspp, ACMANAptspp, ACMUMptspp, ARBTptspp, ASCBptspp, ATPS4rpp, CELBpts, CHTBSptspp, DHAPT, FRUpts2pp, FRUptspp, GALTptspp, GAMptspp, GLCptspp, LDH_D, MALTptspp, MANGLYCptspp, MANptspp, MNLptspp, MNNH, SBTptspp, SUCptspp, TREptspp
768	-54.8261	EX_succ_e	10.8056	-10	0.0694611	4	31.7019	-5.75177	27.0716	-3.75903	8.38941	b2988, b2415, b3732, b1380	2DGLCptspp, ACGAptspp, ACMANAptspp, ACMUMptspp, ARBTptspp, ASCBptspp, ATPS4rpp, CELBpts, CHTBSptspp, DHAPT, FRUpts2pp, FRUptspp, GALTptspp, GAMptspp, GLCptspp, GSPMDA, GSPMDS, LDH_D, MALTptspp, MANGLYCptspp, MANptspp, MNLptspp, SBTptspp, SUCptspp, TREptspp
769	-54.8261	EX_succ_e	10.8056	-10	0.0694611	4	31.7019	-5.75177	27.0716	-3.75903	8.38941	b2988, b2415, b3736, b1380	2DGLCptspp, ACGAptspp, ACMANAptspp, ACMUMptspp, ARBTptspp, ASCBptspp, ATPS4rpp, CELBpts, CHTBSptspp, DHAPT, FRUpts2pp, FRUptspp, GALTptspp, GAMptspp, GLCptspp, GSPMDA, GSPMDS, LDH_D, MALTptspp, MANGLYCptspp, MANptspp, MNLptspp, SBTptspp, SUCptspp, TREptspp
770	-54.8261	EX_succ_e	10.8056	-10	0.0694611	4	31.7019	-5.75177	27.0716	-3.75903	8.38941	b2415, b3732, b1380, b0831	2DGLCptspp, ACGAptspp, ACMANAptspp, ACMUMptspp, ARBTptspp, ASCBptspp, ATPS4rpp, CELBpts, CHTBSptspp, DHAPT, FRUpts2pp, FRUptspp, GALTptspp, GAMptspp, GLCptspp, GTHRDabcpp, LDH_D, MALTptspp, MANGLYCptspp, MANptspp, MNLptspp, SBTptspp, SUCptspp, TREptspp
771	-54.8261	EX_succ_e	10.8056	-10	0.0694611	4	31.7019	-5.75177	27.0716	-3.75903	8.38941	b2415, b3732, b1380, b0830	2DGLCptspp, ACGAptspp, ACMANAptspp, ACMUMptspp, ARBTptspp, ASCBptspp, ATPS4rpp, CELBpts, CHTBSptspp, DHAPT, FRUpts2pp, FRUptspp, GALTptspp, GAMptspp, GLCptspp, GTHRDabcpp, LDH_D, MALTptspp, MANGLYCptspp, MANptspp, MNLptspp, SBTptspp, SUCptspp, TREptspp
772	-54.8261	EX_succ_e	10.8056	-10	0.0694611	4	31.7019	-5.75177	27.0716	-3.75903	8.38941	b2415, b3736, b1380, b0831	2DGLCptspp, ACGAptspp, ACMANAptspp, ACMUMptspp, ARBTptspp, ASCBptspp, ATPS4rpp, CELBpts, CHTBSptspp, DHAPT, FRUpts2pp, FRUptspp, GALTptspp, GAMptspp, GLCptspp, GTHRDabcpp, LDH_D, MALTptspp, MANGLYCptspp, MANptspp, MNLptspp, SBTptspp, SUCptspp, TREptspp
773	-54.8261	EX_succ_e	10.8056	-10	0.0694611	4	31.7019	-5.75177	27.0716	-3.75903	8.38941	b2415, b3736, b1380, b0830	2DGLCptspp, ACGAptspp, ACMANAptspp, ACMUMptspp, ARBTptspp, ASCBptspp, ATPS4rpp, CELBpts, CHTBSptspp, DHAPT, FRUpts2pp, FRUptspp, GALTptspp, GAMptspp, GLCptspp, GTHRDabcpp, LDH_D, MALTptspp, MANGLYCptspp, MANptspp, MNLptspp, SBTptspp, SUCptspp, TREptspp
774	-54.8261	EX_succ_e	10.8056	-10	0.0694611	4	31.7019	-5.75177	27.0716	-3.75903	8.38941	b2415, b3732, b1380, b0832	2DGLCptspp, ACGAptspp, ACMANAptspp, ACMUMptspp, ARBTptspp, ASCBptspp, ATPS4rpp, CELBpts, CHTBSptspp, DHAPT, FRUpts2pp, FRUptspp, GALTptspp, GAMptspp, GLCptspp, GTHRDabcpp, LDH_D, MALTptspp, MANGLYCptspp, MANptspp, MNLptspp, SBTptspp, SUCptspp, TREptspp
775	-54.8261	EX_succ_e	10.8056	-10	0.0694611	4	31.7019	-5.75177	27.0716	-3.75903	8.38941	b2415, b3732, b1380, b0829	2DGLCptspp, ACGAptspp, ACMANAptspp, ACMUMptspp, ARBTptspp, ASCBptspp, ATPS4rpp, CELBpts, CHTBSptspp, DHAPT, FRUpts2pp, FRUptspp, GALTptspp, GAMptspp, GLCptspp, GTHRDabcpp, LDH_D, MALTptspp, MANGLYCptspp, MANptspp, MNLptspp, SBTptspp, SUCptspp, TREptspp
776	-54.8261	EX_succ_e	10.8056	-10	0.0694611	4	31.7019	-5.75177	27.0716	-3.75903	8.38941	b2415, b3736, b1380, b0832	2DGLCptspp, ACGAptspp, ACMANAptspp, ACMUMptspp, ARBTptspp, ASCBptspp, ATPS4rpp, CELBpts, CHTBSptspp, DHAPT, FRUpts2pp, FRUptspp, GALTptspp, GAMptspp, GLCptspp, GTHRDabcpp, LDH_D, MALTptspp, MANGLYCptspp, MANptspp, MNLptspp, SBTptspp, SUCptspp, TREptspp
777	-54.8261	EX_succ_e	10.8056	-10	0.0694611	4	31.7019	-5.75177	27.0716	-3.75903	8.38941	b2415, b3736, b1380, b0829	2DGLCptspp, ACGAptspp, ACMANAptspp, ACMUMptspp, ARBTptspp, ASCBptspp, ATPS4rpp, CELBpts, CHTBSptspp, DHAPT, FRUpts2pp, FRUptspp, GALTptspp, GAMptspp, GLCptspp, GTHRDabcpp, LDH_D, MALTptspp, MANGLYCptspp, MANptspp, MNLptspp, SBTptspp, SUCptspp, TREptspp
778	-54.8261	EX_succ_e	10.8056	-10	0.0694611	4	31.7019	-5.75177	27.0716	-3.75903	8.38941	b2415, b3736, b0212, b1380	2DGLCptspp, ACGAptspp, ACMANAptspp, ACMUMptspp, ARBTptspp, ASCBptspp, ATPS4rpp, CELBpts, CHTBSptspp, DHAPT, FRUpts2pp, FRUptspp, GALTptspp, GAMptspp, GLCptspp, GLYOX, LDH_D, MALTptspp, MANGLYCptspp, MANptspp, MNLptspp, SBTptspp, SUCptspp, TREptspp
779	-54.8261	EX_succ_e	10.8056	-10	0.0694611	4	31.7019	-5.75177	27.0716	-3.75903	8.38941	b2415, b1651, b3732, b1380	2DGLCptspp, ACGAptspp, ACMANAptspp, ACMUMptspp, ARBTptspp, ASCBptspp, ATPS4rpp, CELBpts, CHTBSptspp, DHAPT, FRUpts2pp, FRUptspp, GALTptspp, GAMptspp, GLCptspp, LDH_D, LGTHL, MALTptspp, MANGLYCptspp, MANptspp, MNLptspp, SBTptspp, SUCptspp, TREptspp
780	-54.8261	EX_succ_e	10.8056	-10	0.0694611	4	31.7019	-5.75177	27.0716	-3.75903	8.38941	b2415, b3732, b0212, b1380	2DGLCptspp, ACGAptspp, ACMANAptspp, ACMUMptspp, ARBTptspp, ASCBptspp, ATPS4rpp, CELBpts, CHTBSptspp, DHAPT, FRUpts2pp, FRUptspp, GALTptspp, GAMptspp, GLCptspp, GLYOX, LDH_D, MALTptspp, MANGLYCptspp, MANptspp, MNLptspp, SBTptspp, SUCptspp, TREptspp
781	-54.8261	EX_succ_e	10.8056	-10	0.0694611	4	31.7019	-5.75177	27.0716	-3.75903	8.38941	b2415, b3736, b1380, b0430	2DGLCptspp, ACGAptspp, ACMANAptspp, ACMUMptspp, ARBTptspp, ASCBptspp, ATPS4rpp, CELBpts, CHTBSptspp, CYTBO3_4pp, DHAPT, FRUpts2pp, FRUptspp, GALTptspp, GAMptspp, GLCptspp, LDH_D, MALTptspp, MANGLYCptspp, MANptspp, MNLptspp, SBTptspp, SUCptspp, TREptspp
782	-54.8261	EX_succ_e	10.8056	-10	0.0694611	4	31.7019	-5.75177	27.0716	-3.75903	8.38941	b2415, b3732, b1380, b0429	2DGLCptspp, ACGAptspp, ACMANAptspp, ACMUMptspp, ARBTptspp, ASCBptspp, ATPS4rpp, CELBpts, CHTBSptspp, CYTBO3_4pp, DHAPT, FRUpts2pp, FRUptspp, GALTptspp, GAMptspp, GLCptspp, LDH_D, MALTptspp, MANGLYCptspp, MANptspp, MNLptspp, SBTptspp, SUCptspp, TREptspp
783	-54.8261	EX_succ_e	10.8056	-10	0.0694611	4	31.7019	-5.75177	27.0716	-3.75903	8.38941	b2415, b3732, b1380, b0432	2DGLCptspp, ACGAptspp, ACMANAptspp, ACMUMptspp, ARBTptspp, ASCBptspp, ATPS4rpp, CELBpts, CHTBSptspp, CYTBO3_4pp, DHAPT, FRUpts2pp, FRUptspp, GALTptspp, GAMptspp, GLCptspp, LDH_D, MALTptspp, MANGLYCptspp, MANptspp, MNLptspp, SBTptspp, SUCptspp, TREptspp
784	-54.8261	EX_succ_e	10.8056	-10	0.0694611	4	31.7019	-5.75177	27.0716	-3.75903	8.38941	b2415, b3736, b1380, b0432	2DGLCptspp, ACGAptspp, ACMANAptspp, ACMUMptspp, ARBTptspp, ASCBptspp, ATPS4rpp, CELBpts, CHTBSptspp, CYTBO3_4pp, DHAPT, FRUpts2pp, FRUptspp, GALTptspp, GAMptspp, GLCptspp, LDH_D, MALTptspp, MANGLYCptspp, MANptspp, MNLptspp, SBTptspp, SUCptspp, TREptspp
785	-54.8261	EX_succ_e	10.8056	-10	0.0694611	4	31.7019	-5.75177	27.0716	-3.75903	8.38941	b2415, b3736, b1380, b0431	2DGLCptspp, ACGAptspp, ACMANAptspp, ACMUMptspp, ARBTptspp, ASCBptspp, ATPS4rpp, CELBpts, CHTBSptspp, CYTBO3_4pp, DHAPT, FRUpts2pp, FRUptspp, GALTptspp, GAMptspp, GLCptspp, LDH_D, MALTptspp, MANGLYCptspp, MANptspp, MNLptspp, SBTptspp, SUCptspp, TREptspp
786	-54.8261	EX_succ_e	10.8056	-10	0.0694611	4	31.7019	-5.75177	27.0716	-3.75903	8.38941	b2415, b3736, b1380, b0429	2DGLCptspp, ACGAptspp, ACMANAptspp, ACMUMptspp, ARBTptspp, ASCBptspp, ATPS4rpp, CELBpts, CHTBSptspp, CYTBO3_4pp, DHAPT, FRUpts2pp, FRUptspp, GALTptspp, GAMptspp, GLCptspp, LDH_D, MALTptspp, MANGLYCptspp, MANptspp, MNLptspp, SBTptspp, SUCptspp, TREptspp
787	-54.8261	EX_succ_e	10.8056	-10	0.0694611	4	31.7019	-5.75177	27.0716	-3.75903	8.38941	b2415, b3732, b1380, b0430	2DGLCptspp, ACGAptspp, ACMANAptspp, ACMUMptspp, ARBTptspp, ASCBptspp, ATPS4rpp, CELBpts, CHTBSptspp, CYTBO3_4pp, DHAPT, FRUpts2pp, FRUptspp, GALTptspp, GAMptspp, GLCptspp, LDH_D, MALTptspp, MANGLYCptspp, MANptspp, MNLptspp, SBTptspp, SUCptspp, TREptspp
788	-54.8261	EX_succ_e	10.8056	-10	0.0694611	4	31.7019	-5.75177	27.0716	-3.75903	8.38941	b1232, b2415, b3732, b1380	2DGLCptspp, ACGAptspp, ACMANAptspp, ACMUMptspp, ARBTptspp, ASCBptspp, ATPS4rpp, CELBpts, CHTBSptspp, DHAPT, FRUpts2pp, FRUptspp, FTHFD, GALTptspp, GAMptspp, GLCptspp, LDH_D, MALTptspp, MANGLYCptspp, MANptspp, MNLptspp, SBTptspp, SUCptspp, TREptspp
789	-54.8261	EX_succ_e	10.8056	-10	0.0694611	4	31.7019	-5.75177	27.0716	-3.75903	8.38941	b1232, b2415, b3736, b1380	2DGLCptspp, ACGAptspp, ACMANAptspp, ACMUMptspp, ARBTptspp, ASCBptspp, ATPS4rpp, CELBpts, CHTBSptspp, DHAPT, FRUpts2pp, FRUptspp, FTHFD, GALTptspp, GAMptspp, GLCptspp, LDH_D, MALTptspp, MANGLYCptspp, MANptspp, MNLptspp, SBTptspp, SUCptspp, TREptspp
790	-54.8261	EX_succ_e	10.8056	-10	0.0694611	4	31.7019	-5.75177	27.0716	-3.75903	8.38941	b2415, b0480, b3732, b1380	2DGLCptspp, ACGAptspp, ACMANAptspp, ACMUMptspp, ARBTptspp, ASCBptspp, ATPS4rpp, CELBpts, CHTBSptspp, DHAPT, FRUpts2pp, FRUptspp, GALTptspp, GAMptspp, GLCptspp, LDH_D, MALTptspp, MANGLYCptspp, MANptspp, MNLptspp, SBTptspp, SUCptspp, TREptspp, UACGALPpp, UACGAMPpp, UDPGALPpp, UDPGPpp, UGLCURPpp
791	-54.8261	EX_succ_e	10.8056	-10	0.0694611	4	31.7019	-5.75177	27.0716	-3.75903	8.38941	b2415, b0480, b3736, b1380	2DGLCptspp, ACGAptspp, ACMANAptspp, ACMUMptspp, ARBTptspp, ASCBptspp, ATPS4rpp, CELBpts, CHTBSptspp, DHAPT, FRUpts2pp, FRUptspp, GALTptspp, GAMptspp, GLCptspp, LDH_D, MALTptspp, MANGLYCptspp, MANptspp, MNLptspp, SBTptspp, SUCptspp, TREptspp, UACGALPpp, UACGAMPpp, UDPGALPpp, UDPGPpp, UGLCURPpp
792	-54.8261	EX_succ_e	10.8056	-10	0.0694611	4	31.7019	-5.75177	27.0716	-3.75903	8.38941	b2415, b3736, b1380, b3070	2DGLCptspp, ACGAptspp, ACMANAptspp, ACMUMptspp, ARBTptspp, ASCBptspp, ATPS4rpp, CELBpts, CHTBSptspp, DHAPT, FE3DCITR5, FE3DHBZS3R, FEENTERR4, FRUpts2pp, FRUptspp, GALTptspp, GAMptspp, GLCptspp, LDH_D, MALTptspp, MANGLYCptspp, MANptspp, MNLptspp, SBTptspp, SUCptspp, TREptspp
793	-54.8261	EX_succ_e	10.8056	-10	0.0694611	4	31.7019	-5.75177	27.0716	-3.75903	8.38941	b2415, b1748, b3732, b1380	2DGLCptspp, ACGAptspp, ACMANAptspp, ACMUMptspp, ARBTptspp, ASCBptspp, ATPS4rpp, CELBpts, CHTBSptspp, DHAPT, FRUpts2pp, FRUptspp, GALTptspp, GAMptspp, GLCptspp, LDH_D, MALTptspp, MANGLYCptspp, MANptspp, MNLptspp, SBTptspp, SOTA, SUCptspp, TREptspp
794	-54.8261	EX_succ_e	10.8056	-10	0.0694611	4	31.7019	-5.75177	27.0716	-3.75903	8.38941	b1747, b2415, b3732, b1380	2DGLCptspp, ACGAptspp, ACMANAptspp, ACMUMptspp, ARBTptspp, ASCBptspp, AST, ATPS4rpp, CELBpts, CHTBSptspp, DHAPT, FRUpts2pp, FRUptspp, GALTptspp, GAMptspp, GLCptspp, LDH_D, MALTptspp, MANGLYCptspp, MANptspp, MNLptspp, SBTptspp, SUCptspp, TREptspp
795	-54.8261	EX_succ_e	10.8056	-10	0.0694611	4	31.7019	-5.75177	27.0716	-3.75903	8.38941	b2415, b1746, b3732, b1380	2DGLCptspp, ACGAptspp, ACMANAptspp, ACMUMptspp, ARBTptspp, ASCBptspp, ATPS4rpp, CELBpts, CHTBSptspp, DHAPT, FRUpts2pp, FRUptspp, GALTptspp, GAMptspp, GLCptspp, LDH_D, MALTptspp, MANGLYCptspp, MANptspp, MNLptspp, SBTptspp, SGSAD, SUCptspp, TREptspp
796	-54.8261	EX_succ_e	10.8056	-10	0.0694611	4	31.7019	-5.75177	27.0716	-3.75903	8.38941	b2415, b1748, b3736, b1380	2DGLCptspp, ACGAptspp, ACMANAptspp, ACMUMptspp, ARBTptspp, ASCBptspp, ATPS4rpp, CELBpts, CHTBSptspp, DHAPT, FRUpts2pp, FRUptspp, GALTptspp, GAMptspp, GLCptspp, LDH_D, MALTptspp, MANGLYCptspp, MANptspp, MNLptspp, SBTptspp, SOTA, SUCptspp, TREptspp
797	-54.8261	EX_succ_e	10.8056	-10	0.0694611	4	31.7019	-5.75177	27.0716	-3.75903	8.38941	b1747, b2415, b3736, b1380	2DGLCptspp, ACGAptspp, ACMANAptspp, ACMUMptspp, ARBTptspp, ASCBptspp, AST, ATPS4rpp, CELBpts, CHTBSptspp, DHAPT, FRUpts2pp, FRUptspp, GALTptspp, GAMptspp, GLCptspp, LDH_D, MALTptspp, MANGLYCptspp, MANptspp, MNLptspp, SBTptspp, SUCptspp, TREptspp
798	-54.8261	EX_succ_e	10.8056	-10	0.0694611	4	31.7019	-5.75177	27.0716	-3.75903	8.38941	b1744, b2415, b3732, b1380	2DGLCptspp, ACGAptspp, ACMANAptspp, ACMUMptspp, ARBTptspp, ASCBptspp, ATPS4rpp, CELBpts, CHTBSptspp, DHAPT, FRUpts2pp, FRUptspp, GALTptspp, GAMptspp, GLCptspp, LDH_D, MALTptspp, MANGLYCptspp, MANptspp, MNLptspp, SBTptspp, SGDS, SUCptspp, TREptspp
799	-54.8261	EX_succ_e	10.8056	-10	0.0694611	4	31.7019	-5.75177	27.0716	-3.75903	8.38941	b1744, b2415, b3736, b1380	2DGLCptspp, ACGAptspp, ACMANAptspp, ACMUMptspp, ARBTptspp, ASCBptspp, ATPS4rpp, CELBpts, CHTBSptspp, DHAPT, FRUpts2pp, FRUptspp, GALTptspp, GAMptspp, GLCptspp, LDH_D, MALTptspp, MANGLYCptspp, MANptspp, MNLptspp, SBTptspp, SGDS, SUCptspp, TREptspp
800	-54.8261	EX_succ_e	10.8056	-10	0.0694611	4	31.7019	-5.75177	27.0716	-3.75903	8.38941	b2415, b3736, b1745, b1380	2DGLCptspp, ACGAptspp, ACMANAptspp, ACMUMptspp, ARBTptspp, ASCBptspp, ATPS4rpp, CELBpts, CHTBSptspp, DHAPT, FRUpts2pp, FRUptspp, GALTptspp, GAMptspp, GLCptspp, LDH_D, MALTptspp, MANGLYCptspp, MANptspp, MNLptspp, SADH, SBTptspp, SUCptspp, TREptspp
801	-54.8261	EX_succ_e	10.8056	-10	0.0694611	4	31.7019	-5.75177	27.0716	-3.75903	8.38941	b2415, b1746, b3736, b1380	2DGLCptspp, ACGAptspp, ACMANAptspp, ACMUMptspp, ARBTptspp, ASCBptspp, ATPS4rpp, CELBpts, CHTBSptspp, DHAPT, FRUpts2pp, FRUptspp, GALTptspp, GAMptspp, GLCptspp, LDH_D, MALTptspp, MANGLYCptspp, MANptspp, MNLptspp, SBTptspp, SGSAD, SUCptspp, TREptspp
802	-54.8261	EX_succ_e	10.8056	-10	0.0694611	4	31.7019	-5.75177	27.0716	-3.75903	8.38941	b2415, b3732, b3779, b1380	2DGLCptspp, ACGAptspp, ACMANAptspp, ACMUMptspp, ARBTptspp, ASCBptspp, ATPS4rpp, CELBpts, CHTBSptspp, DHAPT, FRUpts2pp, FRUptspp, GALTptspp, GAMptspp, GLCptspp, GTPDPDP, LDH_D, MALTptspp, MANGLYCptspp, MANptspp, MNLptspp, SBTptspp, SUCptspp, TREptspp
803	-54.8261	EX_succ_e	10.8056	-10	0.0694611	4	31.7019	-5.75177	27.0716	-3.75903	8.38941	b2415, b3736, b3779, b1380	2DGLCptspp, ACGAptspp, ACMANAptspp, ACMUMptspp, ARBTptspp, ASCBptspp, ATPS4rpp, CELBpts, CHTBSptspp, DHAPT, FRUpts2pp, FRUptspp, GALTptspp, GAMptspp, GLCptspp, GTPDPDP, LDH_D, MALTptspp, MANGLYCptspp, MANptspp, MNLptspp, SBTptspp, SUCptspp, TREptspp
804	-54.8261	EX_succ_e	10.8056	-10	0.0694611	4	31.7019	-5.75177	27.0716	-3.75903	8.38941	b2415, b3732, b1380, b2912	2DGLCptspp, ACGAptspp, ACMANAptspp, ACMUMptspp, ARBTptspp, ASCBptspp, ATPS4rpp, CELBpts, CHTBSptspp, DHAPT, FOMETRi, FRUpts2pp, FRUptspp, GALTptspp, GAMptspp, GLCptspp, LDH_D, MALTptspp, MANGLYCptspp, MANptspp, MNLptspp, SBTptspp, SUCptspp, TREptspp
805	-54.8261	EX_succ_e	10.8056	-10	0.0694611	4	31.7019	-5.75177	27.0716	-3.75903	8.38941	b2415, b3736, b1380, b2912	2DGLCptspp, ACGAptspp, ACMANAptspp, ACMUMptspp, ARBTptspp, ASCBptspp, ATPS4rpp, CELBpts, CHTBSptspp, DHAPT, FOMETRi, FRUpts2pp, FRUptspp, GALTptspp, GAMptspp, GLCptspp, LDH_D, MALTptspp, MANGLYCptspp, MANptspp, MNLptspp, SBTptspp, SUCptspp, TREptspp
806	-54.8261	EX_succ_e	10.8056	-10	0.0694611	4	31.7019	-5.75177	27.0716	-3.75903	8.38941	b2415, b3732, b1380, b1514	2DGLCptspp, ACGAptspp, ACMANAptspp, ACMUMptspp, AI2abcpp, ARBTptspp, ASCBptspp, ATPS4rpp, CELBpts, CHTBSptspp, DHAPT, FRUpts2pp, FRUptspp, GALTptspp, GAMptspp, GLCptspp, LDH_D, MALTptspp, MANGLYCptspp, MANptspp, MNLptspp, SBTptspp, SUCptspp, TREptspp
807	-54.8261	EX_succ_e	10.8056	-10	0.0694611	4	31.7019	-5.75177	27.0716	-3.75903	8.38941	b2415, b3736, b1380, b1515	2DGLCptspp, ACGAptspp, ACMANAptspp, ACMUMptspp, AI2abcpp, ARBTptspp, ASCBptspp, ATPS4rpp, CELBpts, CHTBSptspp, DHAPT, FRUpts2pp, FRUptspp, GALTptspp, GAMptspp, GLCptspp, LDH_D, MALTptspp, MANGLYCptspp, MANptspp, MNLptspp, SBTptspp, SUCptspp, TREptspp
808	-54.8261	EX_succ_e	10.8056	-10	0.0694611	4	31.7019	-5.75177	27.0716	-3.75903	8.38941	b2415, b3732, b1380, b1513	2DGLCptspp, ACGAptspp, ACMANAptspp, ACMUMptspp, AI2abcpp, ARBTptspp, ASCBptspp, ATPS4rpp, CELBpts, CHTBSptspp, DHAPT, FRUpts2pp, FRUptspp, GALTptspp, GAMptspp, GLCptspp, LDH_D, MALTptspp, MANGLYCptspp, MANptspp, MNLptspp, SBTptspp, SUCptspp, TREptspp
809	-54.8261	EX_succ_e	10.8056	-10	0.0694611	4	31.7019	-5.75177	27.0716	-3.75903	8.38941	b2415, b3732, b1380, b1601	2DGLCptspp, ACGAptspp, ACMANAptspp, ACMUMptspp, AI2tpp, ARBTptspp, ASCBptspp, ATPS4rpp, CELBpts, CHTBSptspp, DHAPT, FRUpts2pp, FRUptspp, GALTptspp, GAMptspp, GLCptspp, LDH_D, MALTptspp, MANGLYCptspp, MANptspp, MNLptspp, SBTptspp, SUCptspp, TREptspp
810	-54.8261	EX_succ_e	10.8056	-10	0.0694611	4	31.7019	-5.75177	27.0716	-3.75903	8.38941	b2415, b3736, b1380, b1513	2DGLCptspp, ACGAptspp, ACMANAptspp, ACMUMptspp, AI2abcpp, ARBTptspp, ASCBptspp, ATPS4rpp, CELBpts, CHTBSptspp, DHAPT, FRUpts2pp, FRUptspp, GALTptspp, GAMptspp, GLCptspp, LDH_D, MALTptspp, MANGLYCptspp, MANptspp, MNLptspp, SBTptspp, SUCptspp, TREptspp
811	-54.8261	EX_succ_e	10.8056	-10	0.0694611	4	31.7019	-5.75177	27.0716	-3.75903	8.38941	b2415, b3732, b1380, b1516	2DGLCptspp, ACGAptspp, ACMANAptspp, ACMUMptspp, AI2abcpp, ARBTptspp, ASCBptspp, ATPS4rpp, CELBpts, CHTBSptspp, DHAPT, FRUpts2pp, FRUptspp, GALTptspp, GAMptspp, GLCptspp, LDH_D, MALTptspp, MANGLYCptspp, MANptspp, MNLptspp, SBTptspp, SUCptspp, TREptspp
812	-54.8261	EX_succ_e	10.8056	-10	0.0694611	4	31.7019	-5.75177	27.0716	-3.75903	8.38941	b2415, b3736, b1380, b1514	2DGLCptspp, ACGAptspp, ACMANAptspp, ACMUMptspp, AI2abcpp, ARBTptspp, ASCBptspp, ATPS4rpp, CELBpts, CHTBSptspp, DHAPT, FRUpts2pp, FRUptspp, GALTptspp, GAMptspp, GLCptspp, LDH_D, MALTptspp, MANGLYCptspp, MANptspp, MNLptspp, SBTptspp, SUCptspp, TREptspp
813	-54.8261	EX_succ_e	10.8056	-10	0.0694611	4	31.7019	-5.75177	27.0716	-3.75903	8.38941	b2415, b3736, b1380, b1601	2DGLCptspp, ACGAptspp, ACMANAptspp, ACMUMptspp, AI2tpp, ARBTptspp, ASCBptspp, ATPS4rpp, CELBpts, CHTBSptspp, DHAPT, FRUpts2pp, FRUptspp, GALTptspp, GAMptspp, GLCptspp, LDH_D, MALTptspp, MANGLYCptspp, MANptspp, MNLptspp, SBTptspp, SUCptspp, TREptspp
814	-54.8261	EX_succ_e	10.8056	-10	0.0694611	4	31.7019	-5.75177	27.0716	-3.75903	8.38941	b2415, b3736, b1380, b1516	2DGLCptspp, ACGAptspp, ACMANAptspp, ACMUMptspp, AI2abcpp, ARBTptspp, ASCBptspp, ATPS4rpp, CELBpts, CHTBSptspp, DHAPT, FRUpts2pp, FRUptspp, GALTptspp, GAMptspp, GLCptspp, LDH_D, MALTptspp, MANGLYCptspp, MANptspp, MNLptspp, SBTptspp, SUCptspp, TREptspp
815	-54.8261	EX_succ_e	10.8056	-10	0.0694611	4	31.7019	-5.75177	27.0716	-3.75903	8.38941	b2415, b3732, b1380, b1515	2DGLCptspp, ACGAptspp, ACMANAptspp, ACMUMptspp, AI2abcpp, ARBTptspp, ASCBptspp, ATPS4rpp, CELBpts, CHTBSptspp, DHAPT, FRUpts2pp, FRUptspp, GALTptspp, GAMptspp, GLCptspp, LDH_D, MALTptspp, MANGLYCptspp, MANptspp, MNLptspp, SBTptspp, SUCptspp, TREptspp
816	-54.8261	EX_succ_e	10.8056	-10	0.0694611	4	31.7019	-5.75177	27.0716	-3.75903	8.38941	b2415, b3732, b1102, b1380	2DGLCptspp, ACGAptspp, ACMANAptspp, ACMUMptspp, ARBTptspp, ASCBptspp, ATPS4rpp, CELBpts, CHTBSptspp, CPGNtonex, DHAPT, FRUpts2pp, FRUptspp, GALTptspp, GAMptspp, GLCptspp, LDH_D, MALTptspp, MANGLYCptspp, MANptspp, MNLptspp, SBTptspp, SUCptspp, TREptspp
817	-54.8261	EX_succ_e	10.8056	-10	0.0694611	4	31.7019	-5.75177	27.0716	-3.75903	8.38941	b2415, b3736, b1102, b1380	2DGLCptspp, ACGAptspp, ACMANAptspp, ACMUMptspp, ARBTptspp, ASCBptspp, ATPS4rpp, CELBpts, CHTBSptspp, CPGNtonex, DHAPT, FRUpts2pp, FRUptspp, GALTptspp, GAMptspp, GLCptspp, LDH_D, MALTptspp, MANGLYCptspp, MANptspp, MNLptspp, SBTptspp, SUCptspp, TREptspp
818	-54.8261	EX_succ_e	10.8056	-10	0.0694611	4	31.7019	-5.75177	27.0716	-3.75903	8.38941	b2415, b3736, b1059, b1380	2DGLCptspp, ACGAptspp, ACMANAptspp, ACMUMptspp, ARBTptspp, ASCBptspp, ATPS4rpp, CELBpts, CHTBSptspp, DHAPT, FRUpts2pp, FRUptspp, GALTptspp, GAMptspp, GLCptspp, LDH_D, MALTptspp, MANGLYCptspp, MANptspp, MNLptspp, MTRPOX, SARCOX, SBTptspp, SUCptspp, TREptspp
819	-54.8261	EX_succ_e	10.8056	-10	0.0694611	4	31.7019	-5.75177	27.0716	-3.75903	8.38941	b2415, b3732, b1059, b1380	2DGLCptspp, ACGAptspp, ACMANAptspp, ACMUMptspp, ARBTptspp, ASCBptspp, ATPS4rpp, CELBpts, CHTBSptspp, DHAPT, FRUpts2pp, FRUptspp, GALTptspp, GAMptspp, GLCptspp, LDH_D, MALTptspp, MANGLYCptspp, MANptspp, MNLptspp, MTRPOX, SARCOX, SBTptspp, SUCptspp, TREptspp
820	-54.8261	EX_succ_e	10.8056	-10	0.0694611	4	31.7019	-5.75177	27.0716	-3.75903	8.38941	b1479, b2415, b3732, b1380	2DGLCptspp, ACGAptspp, ACMANAptspp, ACMUMptspp, ARBTptspp, ASCBptspp, ATPS4rpp, CELBpts, CHTBSptspp, DHAPT, FRUpts2pp, FRUptspp, GALTptspp, GAMptspp, GLCptspp, LDH_D, MALTptspp, MANGLYCptspp, MANptspp, ME1, MNLptspp, SBTptspp, SUCptspp, TREptspp
821	-54.8261	EX_succ_e	10.8056	-10	0.0694611	4	31.7019	-5.75177	27.0716	-3.75903	8.38941	b1479, b2415, b3736, b1380	2DGLCptspp, ACGAptspp, ACMANAptspp, ACMUMptspp, ARBTptspp, ASCBptspp, ATPS4rpp, CELBpts, CHTBSptspp, DHAPT, FRUpts2pp, FRUptspp, GALTptspp, GAMptspp, GLCptspp, LDH_D, MALTptspp, MANGLYCptspp, MANptspp, ME1, MNLptspp, SBTptspp, SUCptspp, TREptspp
822	-54.8261	EX_succ_e	10.8056	-10	0.0694611	4	31.7019	-5.75177	27.0716	-3.75903	8.38941	b2883, b2415, b3732, b1380	2DGLCptspp, ACGAptspp, ACMANAptspp, ACMUMptspp, ARBTptspp, ASCBptspp, ATPS4rpp, CELBpts, CHTBSptspp, DHAPT, FRUpts2pp, FRUptspp, GALTptspp, GAMptspp, GLCptspp, GUAD, LDH_D, MALTptspp, MANGLYCptspp, MANptspp, MNLptspp, SBTptspp, SUCptspp, TREptspp
823	-54.8261	EX_succ_e	10.8056	-10	0.0694611	4	31.7019	-5.75177	27.0716	-3.75903	8.38941	b2883, b2415, b3736, b1380	2DGLCptspp, ACGAptspp, ACMANAptspp, ACMUMptspp, ARBTptspp, ASCBptspp, ATPS4rpp, CELBpts, CHTBSptspp, DHAPT, FRUpts2pp, FRUptspp, GALTptspp, GAMptspp, GLCptspp, GUAD, LDH_D, MALTptspp, MANGLYCptspp, MANptspp, MNLptspp, SBTptspp, SUCptspp, TREptspp
824	-54.8261	EX_succ_e	10.8056	-10	0.0694611	4	31.7019	-5.75177	27.0716	-3.75903	8.38941	b2415, b0505, b3732, b1380	2DGLCptspp, ACGAptspp, ACMANAptspp, ACMUMptspp, ARBTptspp, ASCBptspp, ATPS4rpp, CELBpts, CHTBSptspp, DHAPT, FRUpts2pp, FRUptspp, GALTptspp, GAMptspp, GLCptspp, LDH_D, MALTptspp, MANGLYCptspp, MANptspp, MNLptspp, SBTptspp, SUCptspp, TREptspp, UGLYCH
825	-54.8261	EX_succ_e	10.8056	-10	0.0694611	4	31.7019	-5.75177	27.0716	-3.75903	8.38941	b2415, b0505, b3736, b1380	2DGLCptspp, ACGAptspp, ACMANAptspp, ACMUMptspp, ARBTptspp, ASCBptspp, ATPS4rpp, CELBpts, CHTBSptspp, DHAPT, FRUpts2pp, FRUptspp, GALTptspp, GAMptspp, GLCptspp, LDH_D, MALTptspp, MANGLYCptspp, MANptspp, MNLptspp, SBTptspp, SUCptspp, TREptspp, UGLYCH
826	-54.8261	EX_succ_e	10.8056	-10	0.0694611	4	31.7019	-5.75177	27.0716	-3.75903	8.38941	b2415, b3732, b1380, b1012	2DGLCptspp, ACGAptspp, ACMANAptspp, ACMUMptspp, ARBTptspp, ASCBptspp, ATPS4rpp, CELBpts, CHTBSptspp, DHAPT, FRUpts2pp, FRUptspp, GALTptspp, GAMptspp, GLCptspp, LDH_D, MALTptspp, MANGLYCptspp, MANptspp, MNLptspp, PYROX, SBTptspp, SUCptspp, TREptspp
827	-54.8261	EX_succ_e	10.8056	-10	0.0694611	4	31.7019	-5.75177	27.0716	-3.75903	8.38941	b2415, b3736, b1380, b1012	2DGLCptspp, ACGAptspp, ACMANAptspp, ACMUMptspp, ARBTptspp, ASCBptspp, ATPS4rpp, CELBpts, CHTBSptspp, DHAPT, FRUpts2pp, FRUptspp, GALTptspp, GAMptspp, GLCptspp, LDH_D, MALTptspp, MANGLYCptspp, MANptspp, MNLptspp, PYROX, SBTptspp, SUCptspp, TREptspp
828	-54.8261	EX_succ_e	10.8056	-10	0.0694611	4	31.7019	-5.75177	27.0716	-3.75903	8.38941	b2415, b3732, b1380, b1009	2DGLCptspp, 3AMACHYD, ACGAptspp, ACMANAptspp, ACMUMptspp, ARBTptspp, ASCBptspp, ATPS4rpp, CELBpts, CHTBSptspp, DHAPT, FRUpts2pp, FRUptspp, GALTptspp, GAMptspp, GLCptspp, LDH_D, MALTptspp, MANGLYCptspp, MANptspp, MNLptspp, SBTptspp, SUCptspp, TREptspp
829	-54.8261	EX_succ_e	10.8056	-10	0.0694611	4	31.7019	-5.75177	27.0716	-3.75903	8.38941	b2415, b3736, b1380, b1009	2DGLCptspp, 3AMACHYD, ACGAptspp, ACMANAptspp, ACMUMptspp, ARBTptspp, ASCBptspp, ATPS4rpp, CELBpts, CHTBSptspp, DHAPT, FRUpts2pp, FRUptspp, GALTptspp, GAMptspp, GLCptspp, LDH_D, MALTptspp, MANGLYCptspp, MANptspp, MNLptspp, SBTptspp, SUCptspp, TREptspp
830	-54.8261	EX_succ_e	10.8056	-10	0.0694611	4	31.7019	-5.75177	27.0716	-3.75903	8.38941	b2415, b3732, b1380, b1010	2DGLCptspp, ACGAptspp, ACMANAptspp, ACMUMptspp, ARBTptspp, ASCBptspp, ATPS4rpp, CELBpts, CHTBSptspp, DHAPT, FRUpts2pp, FRUptspp, GALTptspp, GAMptspp, GLCptspp, LDH_D, MALTptspp, MANGLYCptspp, MANptspp, MNLptspp, POAACR, SBTptspp, SUCptspp, TREptspp
831	-54.8261	EX_succ_e	10.8056	-10	0.0694611	4	31.7019	-5.75177	27.0716	-3.75903	8.38941	b2415, b3736, b1380, b1007	2DGLCptspp, ACGAptspp, ACMANAptspp, ACMUMptspp, ARBTptspp, ASCBptspp, ATPS4rpp, CELBpts, CHTBSptspp, DHAPT, FRUpts2pp, FRUptspp, GALTptspp, GAMptspp, GLCptspp, LDH_D, MALTptspp, MANGLYCptspp, MANptspp, MNLptspp, PYROX, SBTptspp, SUCptspp, TREptspp
832	-54.8261	EX_succ_e	10.8056	-10	0.0694611	4	31.7019	-5.75177	27.0716	-3.75903	8.38941	b2415, b3732, b1380, b1011	2DGLCptspp, ACGAptspp, ACMANAptspp, ACMUMptspp, ARBTptspp, ASCBptspp, ATPS4rpp, CELBpts, CHTBSptspp, DHAPT, FRUpts2pp, FRUptspp, GALTptspp, GAMptspp, GLCptspp, LDH_D, MALTptspp, MANGLYCptspp, MANptspp, MNLptspp, SBTptspp, SUCptspp, TREptspp, URACPAH
833	-54.8261	EX_succ_e	10.8056	-10	0.0694611	4	31.7019	-5.75177	27.0716	-3.75903	8.38941	b2415, b3736, b1380, b1010	2DGLCptspp, ACGAptspp, ACMANAptspp, ACMUMptspp, ARBTptspp, ASCBptspp, ATPS4rpp, CELBpts, CHTBSptspp, DHAPT, FRUpts2pp, FRUptspp, GALTptspp, GAMptspp, GLCptspp, LDH_D, MALTptspp, MANGLYCptspp, MANptspp, MNLptspp, POAACR, SBTptspp, SUCptspp, TREptspp
834	-54.8261	EX_succ_e	10.8056	-10	0.0694611	4	31.7019	-5.75177	27.0716	-3.75903	8.38941	b2415, b3736, b1380, b1011	2DGLCptspp, ACGAptspp, ACMANAptspp, ACMUMptspp, ARBTptspp, ASCBptspp, ATPS4rpp, CELBpts, CHTBSptspp, DHAPT, FRUpts2pp, FRUptspp, GALTptspp, GAMptspp, GLCptspp, LDH_D, MALTptspp, MANGLYCptspp, MANptspp, MNLptspp, SBTptspp, SUCptspp, TREptspp, URACPAH
835	-54.8261	EX_succ_e	10.8056	-10	0.0694611	4	31.7019	-5.75177	27.0716	-3.75903	8.38941	b2415, b2841, b3732, b1380	2DGLCptspp, ACGAptspp, ACMANAptspp, ACMUMptspp, ARBTptspp, ARBt2rpp, ASCBptspp, ATPS4rpp, CELBpts, CHTBSptspp, DHAPT, FRUpts2pp, FRUptspp, GALTptspp, GAMptspp, GLCptspp, LDH_D, MALTptspp, MANGLYCptspp, MANptspp, MNLptspp, SBTptspp, SUCptspp, TREptspp
836	-54.8261	EX_succ_e	10.8056	-10	0.0694611	4	31.7019	-5.75177	27.0716	-3.75903	8.38941	b2415, b2841, b3736, b1380	2DGLCptspp, ACGAptspp, ACMANAptspp, ACMUMptspp, ARBTptspp, ARBt2rpp, ASCBptspp, ATPS4rpp, CELBpts, CHTBSptspp, DHAPT, FRUpts2pp, FRUptspp, GALTptspp, GAMptspp, GLCptspp, LDH_D, MALTptspp, MANGLYCptspp, MANptspp, MNLptspp, SBTptspp, SUCptspp, TREptspp
837	-54.8261	EX_succ_e	10.8056	-10	0.0694611	4	31.7019	-5.75177	27.0716	-3.75903	8.38941	b2222, b2415, b3732, b1380	2DGLCptspp, ACGAptspp, ACMANAptspp, ACMUMptspp, ARBTptspp, ASCBptspp, ATPS4rpp, BUTCT, CELBpts, CHTBSptspp, DHAPT, FRUpts2pp, FRUptspp, GALTptspp, GAMptspp, GLCptspp, HXCT, LDH_D, MALTptspp, MANGLYCptspp, MANptspp, MNLptspp, SBTptspp, SUCptspp, TREptspp
838	-54.8261	EX_succ_e	10.8056	-10	0.0694611	4	31.7019	-5.75177	27.0716	-3.75903	8.38941	b2221, b2415, b3736, b1380	2DGLCptspp, ACGAptspp, ACMANAptspp, ACMUMptspp, ARBTptspp, ASCBptspp, ATPS4rpp, BUTCT, CELBpts, CHTBSptspp, DHAPT, FRUpts2pp, FRUptspp, GALTptspp, GAMptspp, GLCptspp, HXCT, LDH_D, MALTptspp, MANGLYCptspp, MANptspp, MNLptspp, SBTptspp, SUCptspp, TREptspp
839	-54.8261	EX_succ_e	10.8056	-10	0.0694611	4	31.7019	-5.75177	27.0716	-3.75903	8.38941	b2222, b2415, b3736, b1380	2DGLCptspp, ACGAptspp, ACMANAptspp, ACMUMptspp, ARBTptspp, ASCBptspp, ATPS4rpp, BUTCT, CELBpts, CHTBSptspp, DHAPT, FRUpts2pp, FRUptspp, GALTptspp, GAMptspp, GLCptspp, HXCT, LDH_D, MALTptspp, MANGLYCptspp, MANptspp, MNLptspp, SBTptspp, SUCptspp, TREptspp
840	-54.8261	EX_succ_e	10.8056	-10	0.0694611	4	31.7019	-5.75177	27.0716	-3.75903	8.38941	b2143, b2415, b3732, b1380	2DGLCptspp, ACGAptspp, ACMANAptspp, ACMUMptspp, ARBTptspp, ASCBptspp, ATPS4rpp, CELBpts, CHTBSptspp, CYTD, DCYTD, DHAPT, FRUpts2pp, FRUptspp, GALTptspp, GAMptspp, GLCptspp, LDH_D, MALTptspp, MANGLYCptspp, MANptspp, MNLptspp, SBTptspp, SUCptspp, TREptspp
841	-54.8261	EX_succ_e	10.8056	-10	0.0694611	4	31.7019	-5.75177	27.0716	-3.75903	8.38941	b2143, b2415, b3736, b1380	2DGLCptspp, ACGAptspp, ACMANAptspp, ACMUMptspp, ARBTptspp, ASCBptspp, ATPS4rpp, CELBpts, CHTBSptspp, CYTD, DCYTD, DHAPT, FRUpts2pp, FRUptspp, GALTptspp, GAMptspp, GLCptspp, LDH_D, MALTptspp, MANGLYCptspp, MANptspp, MNLptspp, SBTptspp, SUCptspp, TREptspp
842	-54.8261	EX_succ_e	10.8056	-10	0.0694611	4	31.7019	-5.75177	27.0716	-3.75903	8.38941	b2415, b3736, b1539, b1380	2DGLCptspp, ACGAptspp, ACMANAptspp, ACMUMptspp, ARBTptspp, ASCBptspp, ATHRDHr, ATPS4rpp, CELBpts, CHTBSptspp, DHAPT, DSERDHr, FRUpts2pp, FRUptspp, GALTptspp, GAMptspp, GLCptspp, LDH_D, LSERDHr, MALTptspp, MANGLYCptspp, MANptspp, MNLptspp, SBTptspp, SUCptspp, TREptspp
843	-54.8261	EX_succ_e	10.8056	-10	0.0694611	4	31.7019	-5.75177	27.0716	-3.75903	8.38941	b2415, b3732, b1539, b1380	2DGLCptspp, ACGAptspp, ACMANAptspp, ACMUMptspp, ARBTptspp, ASCBptspp, ATHRDHr, ATPS4rpp, CELBpts, CHTBSptspp, DHAPT, DSERDHr, FRUpts2pp, FRUptspp, GALTptspp, GAMptspp, GLCptspp, LDH_D, LSERDHr, MALTptspp, MANGLYCptspp, MANptspp, MNLptspp, SBTptspp, SUCptspp, TREptspp
844	-54.8261	EX_succ_e	10.8056	-10	0.0694611	4	31.7019	-5.75177	27.0716	-3.75903	8.38941	b3417, b2415, b3732, b1380	2DGLCptspp, ACGAptspp, ACMANAptspp, ACMUMptspp, ARBTptspp, ASCBptspp, ATPS4rpp, CELBpts, CHTBSptspp, DHAPT, FRUpts2pp, FRUptspp, GALTptspp, GAMptspp, GLCptspp, LDH_D, MALTptspp, MANGLYCptspp, MANptspp, MLTP1, MLTP2, MLTP3, MNLptspp, SBTptspp, SUCptspp, TREptspp
845	-54.8261	EX_succ_e	10.8056	-10	0.0694611	4	31.7019	-5.75177	27.0716	-3.75903	8.38941	b3417, b2415, b3736, b1380	2DGLCptspp, ACGAptspp, ACMANAptspp, ACMUMptspp, ARBTptspp, ASCBptspp, ATPS4rpp, CELBpts, CHTBSptspp, DHAPT, FRUpts2pp, FRUptspp, GALTptspp, GAMptspp, GLCptspp, LDH_D, MALTptspp, MANGLYCptspp, MANptspp, MLTP1, MLTP2, MLTP3, MNLptspp, SBTptspp, SUCptspp, TREptspp
846	-54.8261	EX_succ_e	10.8056	-10	0.0694611	4	31.7019	-5.75177	27.0716	-3.75903	8.38941	b3617, b2415, b3732, b1380	2DGLCptspp, ACGAptspp, ACMANAptspp, ACMUMptspp, ARBTptspp, ASCBptspp, ATPS4rpp, CELBpts, CHTBSptspp, DHAPT, FRUpts2pp, FRUptspp, GALTptspp, GAMptspp, GLCptspp, GLYAT, LDH_D, MALTptspp, MANGLYCptspp, MANptspp, MNLptspp, SBTptspp, SUCptspp, TREptspp
847	-54.8261	EX_succ_e	10.8056	-10	0.0694611	4	31.7019	-5.75177	27.0716	-3.75903	8.38941	b3617, b2415, b3736, b1380	2DGLCptspp, ACGAptspp, ACMANAptspp, ACMUMptspp, ARBTptspp, ASCBptspp, ATPS4rpp, CELBpts, CHTBSptspp, DHAPT, FRUpts2pp, FRUptspp, GALTptspp, GAMptspp, GLCptspp, GLYAT, LDH_D, MALTptspp, MANGLYCptspp, MANptspp, MNLptspp, SBTptspp, SUCptspp, TREptspp
848	-54.8261	EX_succ_e	10.8056	-10	0.0694611	4	31.7019	-5.75177	27.0716	-3.75903	8.38941	b2415, b3732, b2366, b1380	2DGLCptspp, ACGAptspp, ACMANAptspp, ACMUMptspp, ARBTptspp, ASCBptspp, ATPS4rpp, CELBpts, CHTBSptspp, DHAPT, FRUpts2pp, FRUptspp, GALTptspp, GAMptspp, GLCptspp, LDH_D, MALTptspp, MANGLYCptspp, MANptspp, MNLptspp, SBTptspp, SERD_D, SUCptspp, TREptspp
849	-54.8261	EX_succ_e	10.8056	-10	0.0694611	4	31.7019	-5.75177	27.0716	-3.75903	8.38941	b2415, b3736, b2366, b1380	2DGLCptspp, ACGAptspp, ACMANAptspp, ACMUMptspp, ARBTptspp, ASCBptspp, ATPS4rpp, CELBpts, CHTBSptspp, DHAPT, FRUpts2pp, FRUptspp, GALTptspp, GAMptspp, GLCptspp, LDH_D, MALTptspp, MANGLYCptspp, MANptspp, MNLptspp, SBTptspp, SERD_D, SUCptspp, TREptspp
850	-54.8261	EX_succ_e	10.8056	-10	0.0694611	4	31.7019	-5.75177	27.0716	-3.75903	8.38941	b2415, b3732, b1380, b4141	2DGLCptspp, ACGAptspp, ACMANAptspp, ACMUMptspp, ARBTptspp, ASCBptspp, ATPS4rpp, CELBpts, CHTBSptspp, DHAPT, FRUpts2pp, FRUptspp, GALTptspp, GAMptspp, GLCptspp, ILEt3pp, LDH_D, MALTptspp, MANGLYCptspp, MANptspp, MNLptspp, SBTptspp, SUCptspp, TREptspp
851	-54.8261	EX_succ_e	10.8056	-10	0.0694611	4	31.7019	-5.75177	27.0716	-3.75903	8.38941	b2415, b3736, b1380, b4141	2DGLCptspp, ACGAptspp, ACMANAptspp, ACMUMptspp, ARBTptspp, ASCBptspp, ATPS4rpp, CELBpts, CHTBSptspp, DHAPT, FRUpts2pp, FRUptspp, GALTptspp, GAMptspp, GLCptspp, ILEt3pp, LDH_D, MALTptspp, MANGLYCptspp, MANptspp, MNLptspp, SBTptspp, SUCptspp, TREptspp
852	-54.8261	EX_succ_e	10.8056	-10	0.0694611	4	31.7019	-5.75177	27.0716	-3.75903	8.38941	b2415, b3665, b3732, b1380	2DGLCptspp, ACGAptspp, ACMANAptspp, ACMUMptspp, ADD, ARBTptspp, ASCBptspp, ATPS4rpp, CELBpts, CHTBSptspp, DHAPT, FRUpts2pp, FRUptspp, GALTptspp, GAMptspp, GLCptspp, LDH_D, MALTptspp, MANGLYCptspp, MANptspp, MNLptspp, SBTptspp, SUCptspp, TREptspp
853	-54.8261	EX_succ_e	10.8056	-10	0.0694611	4	31.7019	-5.75177	27.0716	-3.75903	8.38941	b2415, b3665, b3736, b1380	2DGLCptspp, ACGAptspp, ACMANAptspp, ACMUMptspp, ADD, ARBTptspp, ASCBptspp, ATPS4rpp, CELBpts, CHTBSptspp, DHAPT, FRUpts2pp, FRUptspp, GALTptspp, GAMptspp, GLCptspp, LDH_D, MALTptspp, MANGLYCptspp, MANptspp, MNLptspp, SBTptspp, SUCptspp, TREptspp
854	-54.8261	EX_succ_e	10.8056	-10	0.0694611	4	31.7019	-5.75177	27.0716	-3.75903	8.38941	b2415, b1189, b3732, b1380	2DGLCptspp, ACGAptspp, ACMANAptspp, ACMUMptspp, ARBTptspp, ASCBptspp, ATPS4rpp, CELBpts, CHTBSptspp, DAAD, DHAPT, FRUpts2pp, FRUptspp, GALTptspp, GAMptspp, GLCptspp, LDH_D, MALTptspp, MANGLYCptspp, MANptspp, MNLptspp, SBTptspp, SUCptspp, TREptspp
855	-54.8261	EX_succ_e	10.8056	-10	0.0694611	4	31.7019	-5.75177	27.0716	-3.75903	8.38941	b2415, b1189, b3736, b1380	2DGLCptspp, ACGAptspp, ACMANAptspp, ACMUMptspp, ARBTptspp, ASCBptspp, ATPS4rpp, CELBpts, CHTBSptspp, DAAD, DHAPT, FRUpts2pp, FRUptspp, GALTptspp, GAMptspp, GLCptspp, LDH_D, MALTptspp, MANGLYCptspp, MANptspp, MNLptspp, SBTptspp, SUCptspp, TREptspp
856	-54.8261	EX_succ_e	10.8056	-10	0.0694611	4	31.7019	-5.75177	27.0716	-3.75903	8.38941	b2415, b3736, b3653, b1380	2DGLCptspp, ACGAptspp, ACMANAptspp, ACMUMptspp, ARBTptspp, ASCBptspp, ATPS4rpp, CELBpts, CHTBSptspp, DHAPT, FRUpts2pp, FRUptspp, GALTptspp, GAMptspp, GLCptspp, GLUt4pp, LDH_D, MALTptspp, MANGLYCptspp, MANptspp, MNLptspp, SBTptspp, SUCptspp, TREptspp
857	-54.8261	EX_succ_e	10.8056	-10	0.0694611	4	31.7019	-5.75177	27.0716	-3.75903	8.38941	b2415, b3732, b1380, b1488	2DGLCptspp, ACGAptspp, ACMANAptspp, ACMUMptspp, ALAALAD, ARBTptspp, ASCBptspp, ATPS4rpp, CELBpts, CHTBSptspp, DHAPT, FRUpts2pp, FRUptspp, GALTptspp, GAMptspp, GLCptspp, LDH_D, MALTptspp, MANGLYCptspp, MANptspp, MNLptspp, SBTptspp, SUCptspp, TREptspp
858	-54.8261	EX_succ_e	10.8056	-10	0.0694611	4	31.7019	-5.75177	27.0716	-3.75903	8.38941	b2415, b3736, b1380, b1488	2DGLCptspp, ACGAptspp, ACMANAptspp, ACMUMptspp, ALAALAD, ARBTptspp, ASCBptspp, ATPS4rpp, CELBpts, CHTBSptspp, DHAPT, FRUpts2pp, FRUptspp, GALTptspp, GAMptspp, GLCptspp, LDH_D, MALTptspp, MANGLYCptspp, MANptspp, MNLptspp, SBTptspp, SUCptspp, TREptspp
859	-54.8261	EX_succ_e	10.8056	-10	0.0694611	4	31.7019	-5.75177	27.0716	-3.75903	8.38941	b2407, b2415, b3732, b1380	2DGLCptspp, ACGAptspp, ACMANAptspp, ACMUMptspp, ARBTptspp, ASCBptspp, ATPS4rpp, CELBpts, CHTBSptspp, DHAPT, FRUpts2pp, FRUptspp, GALTptspp, GAMptspp, GLCptspp, LDH_D, MALTptspp, MANGLYCptspp, MANptspp, MNLptspp, PUNP7, SBTptspp, SUCptspp, TREptspp
860	-54.8261	EX_succ_e	10.8056	-10	0.0694611	4	31.7019	-5.75177	27.0716	-3.75903	8.38941	b2407, b2415, b3736, b1380	2DGLCptspp, ACGAptspp, ACMANAptspp, ACMUMptspp, ARBTptspp, ASCBptspp, ATPS4rpp, CELBpts, CHTBSptspp, DHAPT, FRUpts2pp, FRUptspp, GALTptspp, GAMptspp, GLCptspp, LDH_D, MALTptspp, MANGLYCptspp, MANptspp, MNLptspp, PUNP7, SBTptspp, SUCptspp, TREptspp
861	-54.8261	EX_succ_e	10.8056	-10	0.0694611	4	31.7019	-5.75177	27.0716	-3.75903	8.38941	b2415, b3736, b1528, b1380	2DGLCptspp, ACGAptspp, ACMANAptspp, ACMUMptspp, ARBTptspp, ARBt3ipp, ASCBptspp, ATPS4rpp, CELBpts, CHTBSptspp, DHAPT, FRUpts2pp, FRUptspp, GALTptspp, GAMptspp, GLCptspp, LDH_D, MALTptspp, MANGLYCptspp, MANptspp, MELIBt3ipp, MNLptspp, SBTptspp, SUCptspp, TREptspp
862	-54.8261	EX_succ_e	10.8056	-10	0.0694611	4	31.7019	-5.75177	27.0716	-3.75903	8.38941	b2415, b3732, b1528, b1380	2DGLCptspp, ACGAptspp, ACMANAptspp, ACMUMptspp, ARBTptspp, ARBt3ipp, ASCBptspp, ATPS4rpp, CELBpts, CHTBSptspp, DHAPT, FRUpts2pp, FRUptspp, GALTptspp, GAMptspp, GLCptspp, LDH_D, MALTptspp, MANGLYCptspp, MANptspp, MELIBt3ipp, MNLptspp, SBTptspp, SUCptspp, TREptspp
863	-54.8261	EX_succ_e	10.8056	-10	0.0694611	4	31.7019	-5.75177	27.0716	-3.75903	8.38941	b0121, b2415, b3732, b1380	2DGLCptspp, ACGAptspp, ACMANAptspp, ACMUMptspp, APCS, ARBTptspp, ASCBptspp, ATPS4rpp, CELBpts, CHTBSptspp, DHAPT, FRUpts2pp, FRUptspp, GALTptspp, GAMptspp, GLCptspp, LDH_D, MALTptspp, MANGLYCptspp, MANptspp, MNLptspp, SBTptspp, SPMS, SUCptspp, TREptspp
864	-54.8261	EX_succ_e	10.8056	-10	0.0694611	4	31.7019	-5.75177	27.0716	-3.75903	8.38941	b0121, b2415, b3736, b1380	2DGLCptspp, ACGAptspp, ACMANAptspp, ACMUMptspp, APCS, ARBTptspp, ASCBptspp, ATPS4rpp, CELBpts, CHTBSptspp, DHAPT, FRUpts2pp, FRUptspp, GALTptspp, GAMptspp, GLCptspp, LDH_D, MALTptspp, MANGLYCptspp, MANptspp, MNLptspp, SBTptspp, SPMS, SUCptspp, TREptspp
865	-54.8261	EX_succ_e	10.8056	-10	0.0694611	4	31.7019	-5.75177	27.0716	-3.75903	8.38941	b0120, b2415, b3732, b1380	2DGLCptspp, ACGAptspp, ACMANAptspp, ACMUMptspp, ADMDC, ARBTptspp, ASCBptspp, ATPS4rpp, CELBpts, CHTBSptspp, DHAPT, FRUpts2pp, FRUptspp, GALTptspp, GAMptspp, GLCptspp, LDH_D, MALTptspp, MANGLYCptspp, MANptspp, MNLptspp, SBTptspp, SUCptspp, TREptspp
866	-54.8261	EX_succ_e	10.8056	-10	0.0694611	4	31.7019	-5.75177	27.0716	-3.75903	8.38941	b0120, b2415, b3736, b1380	2DGLCptspp, ACGAptspp, ACMANAptspp, ACMUMptspp, ADMDC, ARBTptspp, ASCBptspp, ATPS4rpp, CELBpts, CHTBSptspp, DHAPT, FRUpts2pp, FRUptspp, GALTptspp, GAMptspp, GLCptspp, LDH_D, MALTptspp, MANGLYCptspp, MANptspp, MNLptspp, SBTptspp, SUCptspp, TREptspp
867	-54.8261	EX_succ_e	10.8056	-10	0.0694611	4	31.7019	-5.75177	27.0716	-3.75903	8.38941	b2415, b3736, b1967, b1380	2DGLCptspp, ACGAptspp, ACMANAptspp, ACMUMptspp, ARBTptspp, ASCBptspp, ATPS4rpp, CELBpts, CHTBSptspp, DHAPT, FRUpts2pp, FRUptspp, GALTptspp, GAMptspp, GLCptspp, GLYOX3, LDH_D, MALTptspp, MANGLYCptspp, MANptspp, MNLptspp, SBTptspp, SUCptspp, TREptspp
868	-54.8261	EX_succ_e	10.8056	-10	0.0694611	4	31.7019	-5.75177	27.0716	-3.75903	8.38941	b2415, b3732, b1967, b1380	2DGLCptspp, ACGAptspp, ACMANAptspp, ACMUMptspp, ARBTptspp, ASCBptspp, ATPS4rpp, CELBpts, CHTBSptspp, DHAPT, FRUpts2pp, FRUptspp, GALTptspp, GAMptspp, GLCptspp, GLYOX3, LDH_D, MALTptspp, MANGLYCptspp, MANptspp, MNLptspp, SBTptspp, SUCptspp, TREptspp
869	-54.8261	EX_succ_e	10.8056	-10	0.0694611	4	31.7019	-5.75177	27.0716	-3.75903	8.38941	b0038, b2415, b3732, b1380	2DGLCptspp, ACGAptspp, ACMANAptspp, ACMUMptspp, ARBTptspp, ASCBptspp, ATPS4rpp, CELBpts, CHTBSptspp, CRNBTCT, CRNCBCT, DHAPT, FRUpts2pp, FRUptspp, GALTptspp, GAMptspp, GLCptspp, LDH_D, MALTptspp, MANGLYCptspp, MANptspp, MNLptspp, SBTptspp, SUCptspp, TREptspp
870	-54.8261	EX_succ_e	10.8056	-10	0.0694611	4	31.7019	-5.75177	27.0716	-3.75903	8.38941	b2415, b0062, b3733, b1380	2DGLCptspp, ACGAptspp, ACMANAptspp, ACMUMptspp, ARAI, ARBTptspp, ASCBptspp, ATPS4rpp, CELBpts, CHTBSptspp, DHAPT, FRUpts2pp, FRUptspp, GALTptspp, GAMptspp, GLCptspp, LDH_D, MALTptspp, MANGLYCptspp, MANptspp, MNLptspp, SBTptspp, SUCptspp, TREptspp
871	-54.8261	EX_succ_e	10.8056	-10	0.0694611	4	31.7019	-5.75177	27.0716	-3.75903	8.38941	b2415, b0062, b3732, b1380	2DGLCptspp, ACGAptspp, ACMANAptspp, ACMUMptspp, ARAI, ARBTptspp, ASCBptspp, ATPS4rpp, CELBpts, CHTBSptspp, DHAPT, FRUpts2pp, FRUptspp, GALTptspp, GAMptspp, GLCptspp, LDH_D, MALTptspp, MANGLYCptspp, MANptspp, MNLptspp, SBTptspp, SUCptspp, TREptspp
872	-54.8261	EX_succ_e	10.8056	-10	0.0694611	4	31.7019	-5.75177	27.0716	-3.75903	8.38941	b2415, b0062, b3736, b1380	2DGLCptspp, ACGAptspp, ACMANAptspp, ACMUMptspp, ARAI, ARBTptspp, ASCBptspp, ATPS4rpp, CELBpts, CHTBSptspp, DHAPT, FRUpts2pp, FRUptspp, GALTptspp, GAMptspp, GLCptspp, LDH_D, MALTptspp, MANGLYCptspp, MANptspp, MNLptspp, SBTptspp, SUCptspp, TREptspp
873	-54.8261	EX_succ_e	10.8056	-10	0.0694611	4	31.7019	-5.75177	27.0716	-3.75903	8.38941	b0063, b2415, b3732, b1380	2DGLCptspp, ACGAptspp, ACMANAptspp, ACMUMptspp, ARBTptspp, ASCBptspp, ATPS4rpp, CELBpts, CHTBSptspp, DHAPT, FRUpts2pp, FRUptspp, GALTptspp, GAMptspp, GLCptspp, LDH_D, MALTptspp, MANGLYCptspp, MANptspp, MNLptspp, RBK_L1, SBTptspp, SUCptspp, TREptspp
874	-54.8261	EX_succ_e	10.8056	-10	0.0694611	4	31.7019	-5.75177	27.0716	-3.75903	8.38941	b0063, b2415, b3736, b1380	2DGLCptspp, ACGAptspp, ACMANAptspp, ACMUMptspp, ARBTptspp, ASCBptspp, ATPS4rpp, CELBpts, CHTBSptspp, DHAPT, FRUpts2pp, FRUptspp, GALTptspp, GAMptspp, GLCptspp, LDH_D, MALTptspp, MANGLYCptspp, MANptspp, MNLptspp, RBK_L1, SBTptspp, SUCptspp, TREptspp
875	-54.8261	EX_succ_e	10.8056	-10	0.0694611	4	31.7019	-5.75177	27.0716	-3.75903	8.38941	b2415, b3732, b1380, b2906	2DGLCptspp, ACGAptspp, ACMANAptspp, ACMUMptspp, ARBTptspp, ASCBptspp, ATPS4rpp, CELBpts, CHTBSptspp, DHAPT, FRUpts2pp, FRUptspp, GALTptspp, GAMptspp, GLCptspp, LDH_D, MALTptspp, MANGLYCptspp, MANptspp, MNLptspp, OPHHXy, SBTptspp, SUCptspp, TREptspp
876	-54.8261	EX_succ_e	10.8056	-10	0.0694611	4	31.7019	-5.75177	27.0716	-3.75903	8.38941	b2415, b3736, b1380, b2906	2DGLCptspp, ACGAptspp, ACMANAptspp, ACMUMptspp, ARBTptspp, ASCBptspp, ATPS4rpp, CELBpts, CHTBSptspp, DHAPT, FRUpts2pp, FRUptspp, GALTptspp, GAMptspp, GLCptspp, LDH_D, MALTptspp, MANGLYCptspp, MANptspp, MNLptspp, OPHHXy, SBTptspp, SUCptspp, TREptspp
877	-54.8261	EX_succ_e	10.8056	-10	0.0694611	4	31.7019	-5.75177	27.0716	-3.75903	8.38941	b2415, b3732, b1380, b3447	2DGLCptspp, ACGAptspp, ACMANAptspp, ACMUMptspp, ARBTptspp, ASCBptspp, ATPS4rpp, CELBpts, CHTBSptspp, DHAPT, FRUpts2pp, FRUptspp, GALTptspp, GAMptspp, GLCptspp, GTHRDHpp, LDH_D, MALTptspp, MANGLYCptspp, MANptspp, MNLptspp, SBTptspp, SUCptspp, TREptspp
878	-54.8261	EX_succ_e	10.8056	-10	0.0694611	4	31.7019	-5.75177	27.0716	-3.75903	8.38941	b2415, b3736, b1380, b3447	2DGLCptspp, ACGAptspp, ACMANAptspp, ACMUMptspp, ARBTptspp, ASCBptspp, ATPS4rpp, CELBpts, CHTBSptspp, DHAPT, FRUpts2pp, FRUptspp, GALTptspp, GAMptspp, GLCptspp, GTHRDHpp, LDH_D, MALTptspp, MANGLYCptspp, MANptspp, MNLptspp, SBTptspp, SUCptspp, TREptspp
879	-54.8261	EX_succ_e	10.8056	-10	0.0694611	4	31.7019	-5.75177	27.0716	-3.75903	8.38941	b2415, b3736, b1901, b1380	2DGLCptspp, ACGAptspp, ACMANAptspp, ACMUMptspp, ARBTptspp, ARBabcpp, ASCBptspp, ATPS4rpp, CELBpts, CHTBSptspp, DHAPT, FRUpts2pp, FRUptspp, GALTptspp, GAMptspp, GLCptspp, LDH_D, MALTptspp, MANGLYCptspp, MANptspp, MNLptspp, SBTptspp, SUCptspp, TREptspp
880	-54.8261	EX_succ_e	10.8056	-10	0.0694611	4	31.7019	-5.75177	27.0716	-3.75903	8.38941	b2415, b3732, b1900, b1380	2DGLCptspp, ACGAptspp, ACMANAptspp, ACMUMptspp, ARBTptspp, ARBabcpp, ASCBptspp, ATPS4rpp, CELBpts, CHTBSptspp, DHAPT, FRUpts2pp, FRUptspp, GALTptspp, GAMptspp, GLCptspp, LDH_D, MALTptspp, MANGLYCptspp, MANptspp, MNLptspp, SBTptspp, SUCptspp, TREptspp
881	-54.8261	EX_succ_e	10.8056	-10	0.0694611	4	31.7019	-5.75177	27.0716	-3.75903	8.38941	b2415, b3732, b4460, b1380	2DGLCptspp, ACGAptspp, ACMANAptspp, ACMUMptspp, ARBTptspp, ARBabcpp, ASCBptspp, ATPS4rpp, CELBpts, CHTBSptspp, DHAPT, FRUpts2pp, FRUptspp, GALTptspp, GAMptspp, GLCptspp, LDH_D, MALTptspp, MANGLYCptspp, MANptspp, MNLptspp, SBTptspp, SUCptspp, TREptspp
882	-54.8261	EX_succ_e	10.8056	-10	0.0694611	4	31.7019	-5.75177	27.0716	-3.75903	8.38941	b2415, b3736, b1900, b1380	2DGLCptspp, ACGAptspp, ACMANAptspp, ACMUMptspp, ARBTptspp, ARBabcpp, ASCBptspp, ATPS4rpp, CELBpts, CHTBSptspp, DHAPT, FRUpts2pp, FRUptspp, GALTptspp, GAMptspp, GLCptspp, LDH_D, MALTptspp, MANGLYCptspp, MANptspp, MNLptspp, SBTptspp, SUCptspp, TREptspp
883	-54.8261	EX_succ_e	10.8056	-10	0.0694611	4	31.7019	-5.75177	27.0716	-3.75903	8.38941	b2415, b3736, b4460, b1380	2DGLCptspp, ACGAptspp, ACMANAptspp, ACMUMptspp, ARBTptspp, ARBabcpp, ASCBptspp, ATPS4rpp, CELBpts, CHTBSptspp, DHAPT, FRUpts2pp, FRUptspp, GALTptspp, GAMptspp, GLCptspp, LDH_D, MALTptspp, MANGLYCptspp, MANptspp, MNLptspp, SBTptspp, SUCptspp, TREptspp
884	-54.8261	EX_succ_e	10.8056	-10	0.0694611	4	31.7019	-5.75177	27.0716	-3.75903	8.38941	b2518, b2415, b3732, b1380	2DGLCptspp, ACGAptspp, ACMANAptspp, ACMUMptspp, ARBTptspp, ASCBptspp, ATPS4rpp, CELBpts, CHTBSptspp, DHAPT, FRUpts2pp, FRUptspp, GALTptspp, GAMptspp, GLCptspp, LDH_D, MALTptspp, MANGLYCptspp, MANptspp, MNLptspp, SBTptspp, SUCptspp, TREptspp
885	-54.8261	EX_succ_e	10.8056	-10	0.0694611	4	31.7019	-5.75177	27.0716	-3.75903	8.38941	b2415, b3732, b0047, b1380	2DGLCptspp, ACGAptspp, ACMANAptspp, ACMUMptspp, ARBTptspp, ASCBptspp, ATPS4rpp, CELBpts, CHTBSptspp, DHAPT, FRUpts2pp, FRUptspp, GALTptspp, GAMptspp, GLCptspp, LDH_D, MALTptspp, MANGLYCptspp, MANptspp, MNLptspp, SBTptspp, SUCptspp, TREptspp
886	-54.8261	EX_succ_e	10.8056	-10	0.0694611	4	31.7019	-5.75177	27.0716	-3.75903	8.38941	b2415, b1227, b3736, b1380	2DGLCptspp, ACGAptspp, ACMANAptspp, ACMUMptspp, ARBTptspp, ASCBptspp, ATPS4rpp, CELBpts, CHTBSptspp, DHAPT, FRUpts2pp, FRUptspp, GALTptspp, GAMptspp, GLCptspp, LDH_D, MALTptspp, MANGLYCptspp, MANptspp, MNLptspp, SBTptspp, SUCptspp, TREptspp
887	-54.8261	EX_succ_e	10.8056	-10	0.0694611	4	31.7019	-5.75177	27.0716	-3.75903	8.38941	b2415, b2342, b3732, b1380	2DGLCptspp, ACGAptspp, ACMANAptspp, ACMUMptspp, ARBTptspp, ASCBptspp, ATPS4rpp, CELBpts, CHTBSptspp, DHAPT, FRUpts2pp, FRUptspp, GALTptspp, GAMptspp, GLCptspp, LDH_D, MALTptspp, MANGLYCptspp, MANptspp, MNLptspp, SBTptspp, SUCptspp, TREptspp
888	-54.8261	EX_succ_e	10.8056	-10	0.0694611	4	31.7019	-5.75177	27.0716	-3.75903	8.38941	b3996, b2415, b3732, b1380	2DGLCptspp, ACGAptspp, ACMANAptspp, ACMUMptspp, ARBTptspp, ASCBptspp, ATPS4rpp, CELBpts, CHTBSptspp, DHAPT, FRUpts2pp, FRUptspp, GALTptspp, GAMptspp, GLCptspp, LDH_D, MALTptspp, MANGLYCptspp, MANptspp, MNLptspp, SBTptspp, SUCptspp, TREptspp
889	-54.8261	EX_succ_e	10.8056	-10	0.0694611	4	31.7019	-5.75177	27.0716	-3.75903	8.38941	b2415, b3732, b1380, b0577	2DGLCptspp, ACGAptspp, ACMANAptspp, ACMUMptspp, ARBTptspp, ASCBptspp, ATPS4rpp, CELBpts, CHTBSptspp, DHAPT, FRUpts2pp, FRUptspp, GALTptspp, GAMptspp, GLCptspp, LDH_D, MALTptspp, MANGLYCptspp, MANptspp, MNLptspp, SBTptspp, SUCptspp, TREptspp
890	-54.8261	EX_succ_e	10.8056	-10	0.0694611	4	31.7019	-5.75177	27.0716	-3.75903	8.38941	b2415, b2417, b3736, b1380	2DGLCptspp, ACGAptspp, ACMANAptspp, ACMUMptspp, ARBTptspp, ASCBptspp, ATPS4rpp, CELBpts, CHTBSptspp, DHAPT, FRUpts2pp, FRUptspp, GALTptspp, GAMptspp, GLCptspp, LDH_D, MALTptspp, MANGLYCptspp, MANptspp, MNLptspp, SBTptspp, SUCptspp, TREptspp
891	-54.8261	EX_succ_e	10.8056	-10	0.0694611	4	31.7019	-5.75177	27.0716	-3.75903	8.38941	b2415, b3732, b3371, b1380	2DGLCptspp, ACGAptspp, ACMANAptspp, ACMUMptspp, ARBTptspp, ASCBptspp, ATPS4rpp, CELBpts, CHTBSptspp, DHAPT, FRULYSDG, FRUpts2pp, FRUptspp, GALTptspp, GAMptspp, GLCptspp, LDH_D, MALTptspp, MANGLYCptspp, MANptspp, MNLptspp, SBTptspp, SUCptspp, TREptspp
892	-54.8261	EX_succ_e	10.8056	-10	0.0694611	4	31.7019	-5.75177	27.0716	-3.75903	8.38941	b2582, b2415, b3732, b1380	2DGLCptspp, ACGAptspp, ACMANAptspp, ACMUMptspp, ARBTptspp, ASCBptspp, ATPS4rpp, CELBpts, CHTBSptspp, DHAPT, FRUpts2pp, FRUptspp, GALTptspp, GAMptspp, GLCptspp, LDH_D, MALTptspp, MANGLYCptspp, MANptspp, MNLptspp, SBTptspp, SUCptspp, TREptspp
893	-54.8261	EX_succ_e	10.8056	-10	0.0694611	4	31.7019	-5.75177	27.0716	-3.75903	8.38941	b2415, b3732, b2914, b1380	2DGLCptspp, ACGAptspp, ACMANAptspp, ACMUMptspp, ARBTptspp, ASCBptspp, ATPS4rpp, CELBpts, CHTBSptspp, DHAPT, FRUpts2pp, FRUptspp, GALTptspp, GAMptspp, GLCptspp, LDH_D, MALTptspp, MANGLYCptspp, MANptspp, MNLptspp, SBTptspp, SUCptspp, TREptspp
894	-54.8261	EX_succ_e	10.8056	-10	0.0694611	4	31.7019	-5.75177	27.0716	-3.75903	8.38941	b0073, b2415, b3732, b1380	2DGLCptspp, ACGAptspp, ACMANAptspp, ACMUMptspp, ARBTptspp, ASCBptspp, ATPS4rpp, CELBpts, CHTBSptspp, DHAPT, FRUpts2pp, FRUptspp, GALTptspp, GAMptspp, GLCptspp, LDH_D, MALTptspp, MANGLYCptspp, MANptspp, MNLptspp, SBTptspp, SUCptspp, TREptspp
895	-54.8261	EX_succ_e	10.8056	-10	0.0694611	4	31.7019	-5.75177	27.0716	-3.75903	8.38941	b0928, b2415, b3736, b1380	2DGLCptspp, ACGAptspp, ACMANAptspp, ACMUMptspp, ARBTptspp, ASCBptspp, ATPS4rpp, CELBpts, CHTBSptspp, CYSTA, DHAPT, FRUpts2pp, FRUptspp, GALTptspp, GAMptspp, GLCptspp, LDH_D, MALTptspp, MANGLYCptspp, MANptspp, MNLptspp, SBTptspp, SUCptspp, TREptspp
896	-54.8261	EX_succ_e	10.8056	-10	0.0694611	4	31.7019	-5.75177	27.0716	-3.75903	8.38941	b2415, b2203, b3736, b1380	2DGLCptspp, ACGAptspp, ACMANAptspp, ACMUMptspp, ARBTptspp, ASCBptspp, ATPS4rpp, CELBpts, CHTBSptspp, DHAPT, FRUpts2pp, FRUptspp, GALTptspp, GAMptspp, GLCptspp, LDH_D, MALTptspp, MANGLYCptspp, MANptspp, MNLptspp, NO3R1bpp, NO3R2bpp, SBTptspp, SUCptspp, TREptspp
897	-54.8261	EX_succ_e	10.8056	-10	0.0694611	4	31.7019	-5.75177	27.0716	-3.75903	8.38941	b2415, b4195, b3732, b1380	2DGLCptspp, ACGAptspp, ACMANAptspp, ACMUMptspp, ARBTptspp, ASCBptspp, ATPS4rpp, CELBpts, CHTBSptspp, DHAPT, FRUpts2pp, FRUptspp, GALTptspp, GAMptspp, GLCptspp, LDH_D, MALTptspp, MANGLYCptspp, MANptspp, MNLptspp, SBTptspp, SUCptspp, TREptspp
898	-54.8261	EX_succ_e	10.8056	-10	0.0694611	4	31.7019	-5.75177	27.0716	-3.75903	8.38941	b2415, b4219, b3732, b1380	2DGLCptspp, ACGAptspp, ACMANAptspp, ACMUMptspp, ARBTptspp, ASCBptspp, ATPS4rpp, CELBpts, CHTBSptspp, DHAPT, FRUpts2pp, FRUptspp, GALTptspp, GAMptspp, GLCptspp, LDH_D, MALTptspp, MANGLYCptspp, MANptspp, MNLptspp, SBTptspp, SUCptspp, TREptspp
899	-54.8261	EX_succ_e	10.8056	-10	0.0694611	4	31.7019	-5.75177	27.0716	-3.75903	8.38941	b2415, b3397, b3732, b1380	2DGLCptspp, ACGAptspp, ACMANAptspp, ACMUMptspp, ARBTptspp, ASCBptspp, ATPS4rpp, CELBpts, CHTBSptspp, DHAPT, FRUpts2pp, FRUptspp, GALTptspp, GAMptspp, GLCptspp, LDH_D, MALTptspp, MANGLYCptspp, MANptspp, MNLptspp, SBTptspp, SUCptspp, TREptspp
900	-54.8261	EX_succ_e	10.8056	-10	0.0694611	4	31.7019	-5.75177	27.0716	-3.75903	8.38941	b2415, b3736, b3580, b1380	2DGLCptspp, 3KGK, ACGAptspp, ACMANAptspp, ACMUMptspp, ARBTptspp, ASCBptspp, ATPS4rpp, CELBpts, CHTBSptspp, DHAPT, FRUpts2pp, FRUptspp, GALTptspp, GAMptspp, GLCptspp, LDH_D, MALTptspp, MANGLYCptspp, MANptspp, MNLptspp, SBTptspp, SUCptspp, TREptspp
901	-54.8261	EX_succ_e	10.8056	-10	0.0694611	4	31.7019	-5.75177	27.0716	-3.75903	8.38941	b2415, b3736, b4084, b1380	2DGLCptspp, ACGAptspp, ACMANAptspp, ACMUMptspp, ALLK, ARBTptspp, ASCBptspp, ATPS4rpp, CELBpts, CHTBSptspp, DHAPT, FRUpts2pp, FRUptspp, GALTptspp, GAMptspp, GLCptspp, LDH_D, MALTptspp, MANGLYCptspp, MANptspp, MNLptspp, SBTptspp, SUCptspp, TREptspp
902	-54.8261	EX_succ_e	10.8056	-10	0.0694611	4	31.7019	-5.75177	27.0716	-3.75903	8.38941	b2415, b3747, b3736, b1380	2DGLCptspp, ACGAptspp, ACMANAptspp, ACMUMptspp, ARBTptspp, ASCBptspp, ATPS4rpp, CELBpts, CHTBSptspp, DHAPT, FRUpts2pp, FRUptspp, GALTptspp, GAMptspp, GLCptspp, LDH_D, MALTptspp, MANGLYCptspp, MANptspp, MNLptspp, SBTptspp, SUCptspp, TREptspp
903	-54.8261	EX_succ_e	10.8056	-10	0.0694611	4	31.7019	-5.75177	27.0716	-3.75903	8.38941	b2415, b3732, b1380, b0819	2DGLCptspp, ACGAptspp, ACMANAptspp, ACMUMptspp, ARBTptspp, ASCBptspp, ATPS4rpp, CELBpts, CHTBSptspp, DHAPT, FRUpts2pp, FRUptspp, GALTptspp, GAMptspp, GLCptspp, LDH_D, MALTptspp, MANGLYCptspp, MANptspp, MNLptspp, SBTptspp, SUCptspp, TREptspp
904	-54.8261	EX_succ_e	10.8056	-10	0.0694611	4	31.7019	-5.75177	27.0716	-3.75903	8.38941	b2415, b3732, b1380, b1341	2DGLCptspp, ACGAptspp, ACMANAptspp, ACMUMptspp, ARBTptspp, ASCBptspp, ATPS4rpp, CELBpts, CHTBSptspp, DHAPT, FRUpts2pp, FRUptspp, GALTptspp, GAMptspp, GLCptspp, LDH_D, MALTptspp, MANGLYCptspp, MANptspp, MNLptspp, SBTptspp, SUCptspp, TREptspp
905	-54.8261	EX_succ_e	10.8056	-10	0.0694611	4	31.7019	-5.75177	27.0716	-3.75903	8.38941	b2415, b3732, b3829, b1380	2DGLCptspp, ACGAptspp, ACMANAptspp, ACMUMptspp, ARBTptspp, ASCBptspp, ATPS4rpp, CELBpts, CHTBSptspp, DHAPT, FRUpts2pp, FRUptspp, GALTptspp, GAMptspp, GLCptspp, LDH_D, MALTptspp, MANGLYCptspp, MANptspp, MNLptspp, SBTptspp, SUCptspp, TREptspp
906	-54.8261	EX_succ_e	10.8056	-10	0.0694611	4	31.7019	-5.75177	27.0716	-3.75903	8.38941	b2415, b3736, b1991, b1380	2DGLCptspp, ACGAptspp, ACMANAptspp, ACMUMptspp, ARBTptspp, ASCBptspp, ATPS4rpp, CELBpts, CHTBSptspp, DHAPT, FRUpts2pp, FRUptspp, GALTptspp, GAMptspp, GLCptspp, LDH_D, MALTptspp, MANGLYCptspp, MANptspp, MNLptspp, NNDMBRT, SBTptspp, SUCptspp, TREptspp
907	-54.8261	EX_succ_e	10.8056	-10	0.0694611	4	31.7019	-5.75177	27.0716	-3.75903	8.38941	b4192, b2415, b3732, b1380	2DGLCptspp, ACGAptspp, ACMANAptspp, ACMUMptspp, ARBTptspp, ASCBPL, ASCBptspp, ATPS4rpp, CELBpts, CHTBSptspp, DHAPT, FRUpts2pp, FRUptspp, GALTptspp, GAMptspp, GLCptspp, LDH_D, MALTptspp, MANGLYCptspp, MANptspp, MNLptspp, SBTptspp, SUCptspp, TREptspp
908	-54.8261	EX_succ_e	10.8056	-10	0.0694611	4	31.7019	-5.75177	27.0716	-3.75903	8.38941	b2901, b2415, b3732, b1380	2DGLCptspp, ACGAptspp, ACMANAptspp, ACMUMptspp, ARBTptspp, ASCBptspp, ATPS4rpp, CELBpts, CHTBSptspp, DHAPT, FRUpts2pp, FRUptspp, GALTptspp, GAMptspp, GLCptspp, LDH_D, MALTptspp, MANGLYCptspp, MANptspp, MNLptspp, SBTptspp, SUCptspp, TREptspp
909	-54.8261	EX_succ_e	10.8056	-10	0.0694611	4	31.7019	-5.75177	27.0716	-3.75903	8.38941	b2415, b2361, b3732, b1380	2DGLCptspp, ACGAptspp, ACMANAptspp, ACMUMptspp, ARBTptspp, ASCBptspp, ATPS4rpp, CELBpts, CHTBSptspp, DHAPT, FRUpts2pp, FRUptspp, GALTptspp, GAMptspp, GLCptspp, LDH_D, MALTptspp, MANGLYCptspp, MANptspp, MNLptspp, SBTptspp, SUCptspp, TREptspp
910	-54.8261	EX_succ_e	10.8056	-10	0.0694611	4	31.7019	-5.75177	27.0716	-3.75903	8.38941	b2415, b3732, b1380, b2683	2DGLCptspp, ACGAptspp, ACMANAptspp, ACMUMptspp, ARBTptspp, ASCBptspp, ATPS4rpp, CELBpts, CHTBSptspp, DHAPT, FRUpts2pp, FRUptspp, GALTptspp, GAMptspp, GLCptspp, LDH_D, MALTptspp, MANGLYCptspp, MANptspp, MNLptspp, SBTptspp, SUCptspp, TREptspp
911	-54.8261	EX_succ_e	10.8056	-10	0.0694611	4	31.7019	-5.75177	27.0716	-3.75903	8.38941	b2415, b0867, b3736, b1380	2DGLCptspp, ACGAptspp, ACMANAptspp, ACMUMptspp, ARBTptspp, ASCBptspp, ATPS4rpp, CELBpts, CHTBSptspp, DHAPT, FRUpts2pp, FRUptspp, GALTptspp, GAMptspp, GLCptspp, LDH_D, MALTptspp, MANGLYCptspp, MANptspp, MNLptspp, SBTptspp, SUCptspp, TREptspp
912	-54.8261	EX_succ_e	10.8056	-10	0.0694611	4	31.7019	-5.75177	27.0716	-3.75903	8.38941	b2521, b2415, b3732, b1380	2DGLCptspp, ACGAptspp, ACMANAptspp, ACMUMptspp, ARBTptspp, ASCBptspp, ATPS4rpp, CELBpts, CHTBSptspp, DHAPT, FRUpts2pp, FRUptspp, GALTptspp, GAMptspp, GLCptspp, LDH_D, MALTptspp, MANGLYCptspp, MANptspp, MCPST, MNLptspp, SBTptspp, SUCptspp, TREptspp
913	-54.8261	EX_succ_e	10.8056	-10	0.0694611	4	31.7019	-5.75177	27.0716	-3.75903	8.38941	b2415, b3736, b1380, b0268	2DGLCptspp, ACGAptspp, ACMANAptspp, ACMUMptspp, ARBTptspp, ASCBptspp, ATPS4rpp, CELBpts, CHTBSptspp, DHAPT, FRUpts2pp, FRUptspp, GALTptspp, GAMptspp, GLCptspp, LDH_D, MALTptspp, MANGLYCptspp, MANptspp, MNLptspp, SBTptspp, SUCptspp, TREptspp
914	-54.8261	EX_succ_e	10.8056	-10	0.0694611	4	31.7019	-5.75177	27.0716	-3.75903	8.38941	b2415, b3732, b0855, b1380	2DGLCptspp, ACGAptspp, ACMANAptspp, ACMUMptspp, ARBTptspp, ASCBptspp, ATPS4rpp, CELBpts, CHTBSptspp, DHAPT, FRUpts2pp, FRUptspp, GALTptspp, GAMptspp, GLCptspp, LDH_D, MALTptspp, MANGLYCptspp, MANptspp, MNLptspp, SBTptspp, SUCptspp, TREptspp
915	-54.8261	EX_succ_e	10.8056	-10	0.0694611	4	31.7019	-5.75177	27.0716	-3.75903	8.38941	b2415, b4138, b3732, b1380	2DGLCptspp, ACGAptspp, ACMANAptspp, ACMUMptspp, ARBTptspp, ASCBptspp, ATPS4rpp, CELBpts, CHTBSptspp, DHAPT, FRUpts2pp, FRUptspp, GALTptspp, GAMptspp, GLCptspp, LDH_D, MALTptspp, MANGLYCptspp, MANptspp, MNLptspp, SBTptspp, SUCptspp, TREptspp
916	-54.8261	EX_succ_e	10.8056	-10	0.0694611	4	31.7019	-5.75177	27.0716	-3.75903	8.38941	b2415, b3732, b2997, b1380	2DGLCptspp, ACGAptspp, ACMANAptspp, ACMUMptspp, ARBTptspp, ASCBptspp, ATPS4rpp, CELBpts, CHTBSptspp, DHAPT, FRUpts2pp, FRUptspp, GALTptspp, GAMptspp, GLCptspp, LDH_D, MALTptspp, MANGLYCptspp, MANptspp, MNLptspp, SBTptspp, SUCptspp, TREptspp
917	-54.8261	EX_succ_e	10.8056	-10	0.0694611	4	31.7019	-5.75177	27.0716	-3.75903	8.38941	b2415, b1463, b3732, b1380	2DGLCptspp, ACANTHAT, ACGAptspp, ACMANAptspp, ACMUMptspp, ARBTptspp, ASCBptspp, ATPS4rpp, CELBpts, CHTBSptspp, DHAPT, FRUpts2pp, FRUptspp, GALTptspp, GAMptspp, GLCptspp, LDH_D, MALTptspp, MANGLYCptspp, MANptspp, MNLptspp, SBTptspp, SUCptspp, TREptspp
918	-54.8261	EX_succ_e	10.8056	-10	0.0694611	4	31.7019	-5.75177	27.0716	-3.75903	8.38941	b2415, b0754, b3736, b1380	2DGLCptspp, ACGAptspp, ACMANAptspp, ACMUMptspp, ARBTptspp, ASCBptspp, ATPS4rpp, CELBpts, CHTBSptspp, DHAPT, FRUpts2pp, FRUptspp, GALTptspp, GAMptspp, GLCptspp, LDH_D, MALTptspp, MANGLYCptspp, MANptspp, MNLptspp, SBTptspp, SUCptspp, TREptspp
919	-54.8261	EX_succ_e	10.8056	-10	0.0694611	4	31.7019	-5.75177	27.0716	-3.75903	8.38941	b2415, b3517, b3732, b1380	2DGLCptspp, ACGAptspp, ACMANAptspp, ACMUMptspp, ARBTptspp, ASCBptspp, ATPS4rpp, CELBpts, CHTBSptspp, DHAPT, FRUpts2pp, FRUptspp, GALTptspp, GAMptspp, GLCptspp, LDH_D, MALTptspp, MANGLYCptspp, MANptspp, MNLptspp, SBTptspp, SUCptspp, TREptspp
920	-54.8261	EX_succ_e	10.8056	-10	0.0694611	4	31.7019	-5.75177	27.0716	-3.75903	8.38941	b2415, b3736, b1380, b1678	2DGLCptspp, ACGAptspp, ACMANAptspp, ACMUMptspp, ARBTptspp, ASCBptspp, ATPS4rpp, CELBpts, CHTBSptspp, DHAPT, FRUpts2pp, FRUptspp, GALTptspp, GAMptspp, GLCptspp, LDH_D, MALTptspp, MANGLYCptspp, MANptspp, MNLptspp, SBTptspp, SUCptspp, TREptspp
921	-54.8261	EX_succ_e	10.8056	-10	0.0694611	4	31.7019	-5.75177	27.0716	-3.75903	8.38941	b2415, b0679, b3736, b1380	2DGLCptspp, ACGAptspp, ACMANAptspp, ACMUMptspp, ARBTptspp, ASCBptspp, ATPS4rpp, CELBpts, CHTBSptspp, DHAPT, FRUpts2pp, FRUptspp, GALTptspp, GAMptspp, GLCptspp, LDH_D, MALTptspp, MANGLYCptspp, MANptspp, MNLptspp, SBTptspp, SUCptspp, TREptspp
922	-54.8261	EX_succ_e	10.8056	-10	0.0694611	4	31.7019	-5.75177	27.0716	-3.75903	8.38941	b2415, b3732, b0756, b1380	2DGLCptspp, ACGAptspp, ACMANAptspp, ACMUMptspp, ARBTptspp, ASCBptspp, ATPS4rpp, CELBpts, CHTBSptspp, DHAPT, FRUpts2pp, FRUptspp, GALM2pp, GALTptspp, GAMptspp, GLCptspp, LDH_D, MALTptspp, MANGLYCptspp, MANptspp, MNLptspp, SBTptspp, SUCptspp, TREptspp
923	-54.8261	EX_succ_e	10.8056	-10	0.0694611	4	31.7019	-5.75177	27.0716	-3.75903	8.38941	b2415, b3732, b0336, b1380	2DGLCptspp, ACGAptspp, ACMANAptspp, ACMUMptspp, ARBTptspp, ASCBptspp, ATPS4rpp, CELBpts, CHTBSptspp, CSNt2pp, DHAPT, FRUpts2pp, FRUptspp, GALTptspp, GAMptspp, GLCptspp, LDH_D, MALTptspp, MANGLYCptspp, MANptspp, MNLptspp, SBTptspp, SUCptspp, TREptspp
924	-54.8261	EX_succ_e	10.8056	-10	0.0694611	4	31.7019	-5.75177	27.0716	-3.75903	8.38941	b2415, b2797, b3732, b1380	2DGLCptspp, ACGAptspp, ACMANAptspp, ACMUMptspp, ARBTptspp, ASCBptspp, ATPS4rpp, CELBpts, CHTBSptspp, DHAPT, FRUpts2pp, FRUptspp, GALTptspp, GAMptspp, GLCptspp, LDH_D, MALTptspp, MANGLYCptspp, MANptspp, MNLptspp, SBTptspp, SUCptspp, TREptspp
925	-54.8261	EX_succ_e	10.8056	-10	0.0694611	4	31.7019	-5.75177	27.0716	-3.75903	8.38941	b3788, b2415, b3732, b1380	2DGLCptspp, ACGAptspp, ACMANAptspp, ACMUMptspp, ARBTptspp, ASCBptspp, ATPS4rpp, CELBpts, CHTBSptspp, DHAPT, FRUpts2pp, FRUptspp, GALTptspp, GAMptspp, GLCptspp, LDH_D, MALTptspp, MANGLYCptspp, MANptspp, MNLptspp, SBTptspp, SUCptspp, TREptspp
926	-54.8261	EX_succ_e	10.8056	-10	0.0694611	4	31.7019	-5.75177	27.0716	-3.75903	8.38941	b2415, b3732, b4033, b1380	14GLUCANabcpp, 2DGLCptspp, ACGAptspp, ACMANAptspp, ACMUMptspp, ARBTptspp, ASCBptspp, ATPS4rpp, CELBpts, CHTBSptspp, DHAPT, FRUpts2pp, FRUptspp, GALTptspp, GAMptspp, GLCptspp, LDH_D, MALTHXabcpp, MALTPTabcpp, MALTTRabcpp, MALTTTRabcpp, MALTabcpp, MALTptspp, MANGLYCptspp, MANptspp, MNLptspp, SBTptspp, SUCptspp, TREptspp
927	-54.8261	EX_succ_e	10.8056	-10	0.0694611	4	31.7019	-5.75177	27.0716	-3.75903	8.38941	b2415, b0273, b3736, b1380	2DGLCptspp, ACGAptspp, ACMANAptspp, ACMUMptspp, ARBTptspp, ASCBptspp, ATPS4rpp, CELBpts, CHTBSptspp, DHAPT, FRUpts2pp, FRUptspp, GALTptspp, GAMptspp, GLCptspp, LDH_D, MALTptspp, MANGLYCptspp, MANptspp, MNLptspp, SBTptspp, SUCptspp, TREptspp
928	-54.8261	EX_succ_e	10.8056	-10	0.0694611	4	31.7019	-5.75177	27.0716	-3.75903	8.38941	b2415, b3732, b0751, b1380	2DGLCptspp, ACGAptspp, ACMANAptspp, ACMUMptspp, ARBTptspp, ASCBptspp, ATPS4rpp, CELBpts, CHTBSptspp, DHAPT, FRUpts2pp, FRUptspp, GALTptspp, GAMptspp, GLCptspp, LDH_D, MALTptspp, MANGLYCptspp, MANptspp, MNLptspp, NMNPtpp, SBTptspp, SUCptspp, TREptspp
929	-54.8261	EX_succ_e	10.8056	-10	0.0694611	4	31.7019	-5.75177	27.0716	-3.75903	8.38941	b2415, b3826, b3736, b1380	2DGLCptspp, ACGAptspp, ACMANAptspp, ACMUMptspp, ARBTptspp, ASCBptspp, ATPS4rpp, CELBpts, CHTBSptspp, DHAPT, FRUpts2pp, FRUptspp, GALTptspp, GAMptspp, GLCptspp, LDH_D, MALTptspp, MANGLYCptspp, MANptspp, MNLptspp, SBTptspp, SUCptspp, TREptspp
930	-54.8261	EX_succ_e	10.8056	-10	0.0694611	4	31.7019	-5.75177	27.0716	-3.75903	8.38941	b2415, b3736, b1380, b3715	2DGLCptspp, ACGAptspp, ACMANAptspp, ACMUMptspp, ARBTptspp, ASCBptspp, ATPS4rpp, CELBpts, CHTBSptspp, DHAPT, FRUpts2pp, FRUptspp, GALTptspp, GAMptspp, GLCptspp, LDH_D, MALTptspp, MANGLYCptspp, MANptspp, MNLptspp, SBTptspp, SUCptspp, TREptspp
931	-54.8261	EX_succ_e	10.8056	-10	0.0694611	4	31.7019	-5.75177	27.0716	-3.75903	8.38941	b2415, b2722, b3732, b1380	2DGLCptspp, ACGAptspp, ACMANAptspp, ACMUMptspp, ARBTptspp, ASCBptspp, ATPS4rpp, CELBpts, CHTBSptspp, DHAPT, FRUpts2pp, FRUptspp, GALTptspp, GAMptspp, GLCptspp, LDH_D, MALTptspp, MANGLYCptspp, MANptspp, MNLptspp, SBTptspp, SUCptspp, TREptspp
932	-54.8261	EX_succ_e	10.8056	-10	0.0694611	4	31.7019	-5.75177	27.0716	-3.75903	8.38941	b2415, b2173, b3732, b1380	2DGLCptspp, ACGAptspp, ACMANAptspp, ACMUMptspp, ARBTptspp, ASCBptspp, ATPS4rpp, CELBpts, CHTBSptspp, DHAPT, FRUpts2pp, FRUptspp, GALTptspp, GAMptspp, GLCptspp, LDH_D, MALTptspp, MANGLYCptspp, MANptspp, MNLptspp, SBTptspp, SUCptspp, TREptspp
933	-54.8261	EX_succ_e	10.8056	-10	0.0694611	4	31.7019	-5.75177	27.0716	-3.75903	8.38941	b2415, b2215, b3736, b1380	2DGLCptspp, ACGAptspp, ACMANAptspp, ACMUMptspp, ARBTptspp, ASCBptspp, ATPS4rpp, CELBpts, CHTBSptspp, DHAPT, FRUpts2pp, FRUptspp, GALTptspp, GAMptspp, GLCptspp, LDH_D, MALTptspp, MANGLYCptspp, MANptspp, MNLptspp, SBTptspp, SUCptspp, TREptspp
934	-54.8261	EX_succ_e	10.8056	-10	0.0694611	4	31.7019	-5.75177	27.0716	-3.75903	8.38941	b1612, b2415, b3736, b1380	2DGLCptspp, ACGAptspp, ACMANAptspp, ACMUMptspp, ARBTptspp, ASCBptspp, ATPS4rpp, CELBpts, CHTBSptspp, DHAPT, FRUpts2pp, FRUptspp, GALTptspp, GAMptspp, GLCptspp, LDH_D, MALTptspp, MANGLYCptspp, MANptspp, MNLptspp, SBTptspp, SUCptspp, TREptspp
935	-54.8261	EX_succ_e	10.8056	-10	0.0694611	4	31.7019	-5.75177	27.0716	-3.75903	8.38941	b2415, b1907, b3732, b1380	2DGLCptspp, ACGAptspp, ACMANAptspp, ACMUMptspp, ARBTptspp, ASCBptspp, ATPS4rpp, CELBpts, CHTBSptspp, DHAPT, FRUpts2pp, FRUptspp, GALTptspp, GAMptspp, GLCptspp, LDH_D, MALTptspp, MANGLYCptspp, MANptspp, MNLptspp, SBTptspp, SUCptspp, TREptspp
936	-54.8261	EX_succ_e	10.8056	-10	0.0694611	4	31.7019	-5.75177	27.0716	-3.75903	8.38941	b2415, b3736, b1380, b1798	2DGLCptspp, ACGAptspp, ACMANAptspp, ACMUMptspp, ARBTptspp, ASCBptspp, ATPS4rpp, CELBpts, CHTBSptspp, DHAPT, FRUpts2pp, FRUptspp, GALTptspp, GAMptspp, GLCptspp, LDH_D, MALTptspp, MANGLYCptspp, MANptspp, MNLptspp, SBTptspp, SUCptspp, TREptspp
937	-54.8261	EX_succ_e	10.8056	-10	0.0694611	4	31.7019	-5.75177	27.0716	-3.75903	8.38941	b2415, b0752, b3736, b1380	2DGLCptspp, ACGAptspp, ACMANAptspp, ACMUMptspp, ARBTptspp, ASCBptspp, ATPS4rpp, CELBpts, CHTBSptspp, DHAPT, FRUpts2pp, FRUptspp, GALTptspp, GAMptspp, GLCptspp, LDH_D, MALTptspp, MANGLYCptspp, MANptspp, MNLptspp, SBTptspp, SUCptspp, TREptspp
938	-54.8261	EX_succ_e	10.8056	-10	0.0694611	4	31.7019	-5.75177	27.0716	-3.75903	8.38941	b2415, b3736, b1380, b2033	2DGLCptspp, ACGAptspp, ACMANAptspp, ACMUMptspp, ARBTptspp, ASCBptspp, ATPS4rpp, CELBpts, CHTBSptspp, DHAPT, FRUpts2pp, FRUptspp, GALTptspp, GAMptspp, GLCptspp, LDH_D, MALTptspp, MANGLYCptspp, MANptspp, MNLptspp, O16AT, SBTptspp, SUCptspp, TREptspp
939	-54.8261	EX_succ_e	10.8056	-10	0.0694611	4	31.7019	-5.75177	27.0716	-3.75903	8.38941	b2415, b3732, b2256, b1380	2DGLCptspp, ACGAptspp, ACMANAptspp, ACMUMptspp, ARBTptspp, ASCBptspp, ATPS4rpp, CELBpts, CHTBSptspp, DHAPT, FRUpts2pp, FRUptspp, GALTptspp, GAMptspp, GLCptspp, LDH_D, MALTptspp, MANGLYCptspp, MANptspp, MNLptspp, SBTptspp, SUCptspp, TREptspp, UPLA4FNF
940	-54.8261	EX_succ_e	10.8056	-10	0.0694611	4	31.7019	-5.75177	27.0716	-3.75903	8.38941	b2415, b3736, b1380, b4297	2DGLCptspp, ACGAptspp, ACMANAptspp, ACMUMptspp, ARBTptspp, ASCBptspp, ATPS4rpp, CELBpts, CHTBSptspp, DHAPT, FRUpts2pp, FRUptspp, GALTptspp, GAMptspp, GLCptspp, LDH_D, MALTptspp, MANGLYCptspp, MANptspp, MNLptspp, SBTptspp, SUCptspp, TREptspp
941	-54.8261	EX_succ_e	10.8056	-10	0.0694611	4	31.7019	-5.75177	27.0716	-3.75903	8.38941	b3281, b2415, b3736, b1380	2DGLCptspp, ACGAptspp, ACMANAptspp, ACMUMptspp, ARBTptspp, ASCBptspp, ATPS4rpp, CELBpts, CHTBSptspp, DHAPT, FRUpts2pp, FRUptspp, GALTptspp, GAMptspp, GLCptspp, LDH_D, MALTptspp, MANGLYCptspp, MANptspp, MNLptspp, SBTptspp, SUCptspp, TREptspp
942	-54.8261	EX_succ_e	10.8056	-10	0.0694611	4	31.7019	-5.75177	27.0716	-3.75903	8.38941	b2415, b2485, b3732, b1380	2DGLCptspp, ACGAptspp, ACMANAptspp, ACMUMptspp, ARBTptspp, ASCBptspp, ATPS4rpp, CELBpts, CHTBSptspp, DHAPT, FRUpts2pp, FRUptspp, GALTptspp, GAMptspp, GLCptspp, LDH_D, MALTptspp, MANGLYCptspp, MANptspp, MNLptspp, SBTptspp, SUCptspp, TREptspp
943	-54.8261	EX_succ_e	10.8056	-10	0.0694611	4	31.7019	-5.75177	27.0716	-3.75903	8.38941	b2415, b0366, b3732, b1380	2DGLCptspp, ACGAptspp, ACMANAptspp, ACMUMptspp, ARBTptspp, ASCBptspp, ATPS4rpp, CELBpts, CHTBSptspp, DHAPT, FRUpts2pp, FRUptspp, GALTptspp, GAMptspp, GLCptspp, LDH_D, MALTptspp, MANGLYCptspp, MANptspp, MNLptspp, SBTptspp, SUCptspp, TAURabcpp, TREptspp
944	-54.8261	EX_succ_e	10.8056	-10	0.0694611	4	31.7019	-5.75177	27.0716	-3.75903	8.38941	b2415, b1709, b3732, b1380	2DGLCptspp, ACGAptspp, ACMANAptspp, ACMUMptspp, ADOCBLabcpp, ARBTptspp, ASCBptspp, ATPS4rpp, CBIuabcpp, CBL1abcpp, CELBpts, CHTBSptspp, DHAPT, FRUpts2pp, FRUptspp, GALTptspp, GAMptspp, GLCptspp, LDH_D, MALTptspp, MANGLYCptspp, MANptspp, MNLptspp, SBTptspp, SUCptspp, TREptspp
945	-54.8261	EX_succ_e	10.8056	-10	0.0694611	4	31.7019	-5.75177	27.0716	-3.75903	8.38941	b2415, b3732, b1380, b4092	2DGLCptspp, ACGAptspp, ACMANAptspp, ACMUMptspp, ARBTptspp, ASCBptspp, ATPS4rpp, CELBpts, CHTBSptspp, DHAPT, FRUpts2pp, FRUptspp, GALTptspp, GAMptspp, GLCptspp, LDH_D, MALTptspp, MANGLYCptspp, MANptspp, MNLptspp, PRCPD, SBTptspp, SUCptspp, TREptspp
946	-54.8261	EX_succ_e	10.8056	-10	0.0694611	4	31.7019	-5.75177	27.0716	-3.75903	8.38941	b2415, b0764, b3732, b1380	2DGLCptspp, ACGAptspp, ACMANAptspp, ACMUMptspp, ARBTptspp, ASCBptspp, ATPS4rpp, CELBpts, CHTBSptspp, DHAPT, FRUpts2pp, FRUptspp, GALTptspp, GAMptspp, GLCptspp, LDH_D, MALTptspp, MANGLYCptspp, MANptspp, MNLptspp, SBTptspp, SUCptspp, TREptspp, TUNGSabcpp
947	-54.8261	EX_succ_e	10.8056	-10	0.0694611	4	31.7019	-5.75177	27.0716	-3.75903	8.38941	b2415, b4079, b3732, b1380	2DGLCptspp, ACGAptspp, ACMANAptspp, ACMUMptspp, ARBTptspp, ASCBptspp, ATPS4rpp, CELBpts, CHTBSptspp, DHAPT, FHL, FRUpts2pp, FRUptspp, GALTptspp, GAMptspp, GLCptspp, LDH_D, MALTptspp, MANGLYCptspp, MANptspp, MNLptspp, SBTptspp, SUCptspp, TREptspp
948	-54.8261	EX_succ_e	10.8056	-10	0.0694611	4	31.7019	-5.75177	27.0716	-3.75903	8.38941	b2415, b2483, b3732, b1380	2DGLCptspp, ACGAptspp, ACMANAptspp, ACMUMptspp, ARBTptspp, ASCBptspp, ATPS4rpp, CELBpts, CHTBSptspp, DHAPT, FRUpts2pp, FRUptspp, GALTptspp, GAMptspp, GLCptspp, LDH_D, MALTptspp, MANGLYCptspp, MANptspp, MNLptspp, SBTptspp, SUCptspp, TREptspp
949	-54.8261	EX_succ_e	10.8056	-10	0.0694611	4	31.7019	-5.75177	27.0716	-3.75903	8.38941	b2415, b3117, b3732, b1380	2DGLCptspp, ACGAptspp, ACMANAptspp, ACMUMptspp, ARBTptspp, ASCBptspp, ATPS4rpp, CELBpts, CHTBSptspp, DHAPT, FRUpts2pp, FRUptspp, GALTptspp, GAMptspp, GLCptspp, LDH_D, MALTptspp, MANGLYCptspp, MANptspp, MNLptspp, SBTptspp, SUCptspp, TREptspp
950	-54.8261	EX_succ_e	10.8056	-10	0.0694611	4	31.7019	-5.75177	27.0716	-3.75903	8.38941	b2415, b3732, b1380, b4095	2DGLCptspp, ACGAptspp, ACMANAptspp, ACMUMptspp, ARBTptspp, ASCBptspp, ATPS4rpp, CELBpts, CHTBSptspp, DHAPT, FRUpts2pp, FRUptspp, GALTptspp, GAMptspp, GLCptspp, LDH_D, MALTptspp, MANGLYCptspp, MANptspp, MNLptspp, RPNTPH, SBTptspp, SUCptspp, TREptspp
951	-54.8261	EX_succ_e	10.8056	-10	0.0694611	4	31.7019	-5.75177	27.0716	-3.75903	8.38941	b2415, b4055, b3732, b1380	2DGLCptspp, ACGAptspp, ACMANAptspp, ACMUMptspp, ARBTptspp, ASCBptspp, ATPS4rpp, CELBpts, CHTBSptspp, DHAPT, FRUpts2pp, FRUptspp, GALTptspp, GAMptspp, GLCptspp, LDH_D, MALTptspp, MANGLYCptspp, MANptspp, MNLptspp, SBTptspp, SUCptspp, TREptspp, TYRPpp
952	-54.8261	EX_succ_e	10.8056	-10	0.0694611	4	31.7019	-5.75177	27.0716	-3.75903	8.38941	b2415, b3732, b0809, b1380	2DGLCptspp, ACGAptspp, ACMANAptspp, ACMUMptspp, ARBTptspp, ASCBptspp, ATPS4rpp, CELBpts, CHTBSptspp, DHAPT, FRUpts2pp, FRUptspp, GALTptspp, GAMptspp, GLCptspp, GLNabcpp, LDH_D, MALTptspp, MANGLYCptspp, MANptspp, MNLptspp, SBTptspp, SUCptspp, TREptspp
953	-54.8261	EX_succ_e	10.8056	-10	0.0694611	4	31.7019	-5.75177	27.0716	-3.75903	8.38941	b2415, b0123, b3732, b1380	2DGLCptspp, ACGAptspp, ACMANAptspp, ACMUMptspp, ARBTptspp, ASCBptspp, ATPS4rpp, CELBpts, CHTBSptspp, CU1Opp, DHAPT, FRUpts2pp, FRUptspp, GALTptspp, GAMptspp, GLCptspp, LDH_D, MALTptspp, MANGLYCptspp, MANptspp, MNLptspp, SBTptspp, SUCptspp, TREptspp
954	-54.8261	EX_succ_e	10.8056	-10	0.0694611	4	31.7019	-5.75177	27.0716	-3.75903	8.38941	b2415, b3732, b1380, b1801	2DGLCptspp, ACGAptspp, ACMANAptspp, ACMUMptspp, ARBTptspp, ASCBptspp, ATPS4rpp, CELBpts, CHTBSptspp, DHAPT, FRUpts2pp, FRUptspp, GALTptspp, GAMptspp, GLCptspp, LDH_D, MALTptspp, MANGLYCptspp, MANptspp, MNLptspp, SBTptspp, SUCptspp, TREptspp
955	-54.8261	EX_succ_e	10.8056	-10	0.0694611	4	31.7019	-5.75177	27.0716	-3.75903	8.38941	b2415, b3732, b0973, b1380	2DGLCptspp, ACGAptspp, ACMANAptspp, ACMUMptspp, ARBTptspp, ASCBptspp, ATPS4rpp, CELBpts, CHTBSptspp, DHAPT, FRUpts2pp, FRUptspp, GALTptspp, GAMptspp, GLCptspp, LDH_D, MALTptspp, MANGLYCptspp, MANptspp, MNLptspp, SBTptspp, SUCptspp, TREptspp
956	-54.8261	EX_succ_e	10.8056	-10	0.0694611	4	31.7019	-5.75177	27.0716	-3.75903	8.38941	b2415, b3736, b4086, b1380	2DGLCptspp, ACGAptspp, ACMANAptspp, ACMUMptspp, ALLabcpp, ARBTptspp, ASCBptspp, ATPS4rpp, CELBpts, CHTBSptspp, DHAPT, FRUpts2pp, FRUptspp, GALTptspp, GAMptspp, GLCptspp, LDH_D, MALTptspp, MANGLYCptspp, MANptspp, MNLptspp, SBTptspp, SUCptspp, TREptspp
957	-54.8261	EX_succ_e	10.8056	-10	0.0694611	4	31.7019	-5.75177	27.0716	-3.75903	8.38941	b2415, b3736, b0934, b1380	2DGLCptspp, ACGAptspp, ACMANAptspp, ACMUMptspp, ARBTptspp, ASCBptspp, ATPS4rpp, CELBpts, CHTBSptspp, DHAPT, ETHSO3abcpp, FRUpts2pp, FRUptspp, GALTptspp, GAMptspp, GLCptspp, LDH_D, MALTptspp, MANGLYCptspp, MANptspp, MNLptspp, MSO3abcpp, SBTptspp, SUCptspp, SULFACabcpp, TREptspp
958	-54.8261	EX_succ_e	10.8056	-10	0.0694611	4	31.7019	-5.75177	27.0716	-3.75903	8.38941	b2415, b3732, b1380, b0632	2DGLCptspp, ACGAptspp, ACMANAptspp, ACMUMptspp, ARBTptspp, ASCBptspp, ATPS4rpp, CELBpts, CHTBSptspp, DHAPT, FRUpts2pp, FRUptspp, GALTptspp, GAMptspp, GLCptspp, LDH_D, MALTptspp, MANGLYCptspp, MANptspp, MNLptspp, SBTptspp, SUCptspp, TREptspp
959	-54.8261	EX_succ_e	10.8056	-10	0.0694611	4	31.7019	-5.75177	27.0716	-3.75903	8.38941	b2415, b2423, b3736, b1380	2DGLCptspp, ACGAptspp, ACMANAptspp, ACMUMptspp, ARBTptspp, ASCBptspp, ATPS4rpp, CELBpts, CHTBSptspp, DHAPT, FRUpts2pp, FRUptspp, GALTptspp, GAMptspp, GLCptspp, LDH_D, MALTptspp, MANGLYCptspp, MANptspp, MNLptspp, SBTptspp, SELabcpp, SLNTabcpp, SUCptspp, TREptspp, TSULabcpp
960	-54.8261	EX_succ_e	10.8056	-10	0.0694611	4	31.7019	-5.75177	27.0716	-3.75903	8.38941	b2415, b2720, b3732, b1380	2DGLCptspp, ACGAptspp, ACMANAptspp, ACMUMptspp, ARBTptspp, ASCBptspp, ATPS4rpp, CELBpts, CHTBSptspp, DHAPT, FRUpts2pp, FRUptspp, GALTptspp, GAMptspp, GLCptspp, LDH_D, MALTptspp, MANGLYCptspp, MANptspp, MNLptspp, SBTptspp, SUCptspp, TREptspp
961	-54.8261	EX_succ_e	10.8056	-10	0.0694611	4	31.7019	-5.75177	27.0716	-3.75903	8.38941	b2415, b3736, b3751, b1380	2DGLCptspp, ACGAptspp, ACMANAptspp, ACMUMptspp, ARBTptspp, ASCBptspp, ATPS4rpp, CELBpts, CHTBSptspp, DHAPT, FRUpts2pp, FRUptspp, GALTptspp, GAMptspp, GLCptspp, LDH_D, MALTptspp, MANGLYCptspp, MANptspp, MNLptspp, SBTptspp, SUCptspp, TREptspp
962	-54.8261	EX_succ_e	10.8056	-10	0.0694611	4	31.7019	-5.75177	27.0716	-3.75903	8.38941	b2415, b3732, b2170, b1380	2DGLCptspp, ACGAptspp, ACMANAptspp, ACMUMptspp, ARBTptspp, ASCBptspp, ATPS4rpp, CELBpts, CHTBSptspp, DHAPT, FRUpts2pp, FRUptspp, GALTptspp, GAMptspp, GLCptspp, LDH_D, MALTptspp, MANGLYCptspp, MANptspp, MNLptspp, SBTptspp, SUCptspp, TREptspp
963	-54.8261	EX_succ_e	10.8056	-10	0.0694611	4	31.7019	-5.75177	27.0716	-3.75903	8.38941	b0078, b2415, b3732, b1380	2DGLCptspp, ACGAptspp, ACMANAptspp, ACMUMptspp, ARBTptspp, ASCBptspp, ATPS4rpp, CELBpts, CHTBSptspp, DHAPT, FRUpts2pp, FRUptspp, GALTptspp, GAMptspp, GLCptspp, LDH_D, MALTptspp, MANGLYCptspp, MANptspp, MNLptspp, SBTptspp, SUCptspp, TREptspp
964	-54.8261	EX_succ_e	10.8056	-10	0.0694611	4	31.7019	-5.75177	27.0716	-3.75903	8.38941	b1241, b2415, b3736, b1380	2DGLCptspp, ACGAptspp, ACMANAptspp, ACMUMptspp, ARBTptspp, ASCBptspp, ATPS4rpp, CELBpts, CHTBSptspp, DHAPT, FRUpts2pp, FRUptspp, GALTptspp, GAMptspp, GLCptspp, LDH_D, MALTptspp, MANGLYCptspp, MANptspp, MNLptspp, SBTptspp, SUCptspp, TREptspp
965	-54.8261	EX_succ_e	10.8056	-10	0.0694611	4	31.7019	-5.75177	27.0716	-3.75903	8.38941	b3057, b2415, b3732, b1380	2DGLCptspp, ACGAptspp, ACMANAptspp, ACMUMptspp, ARBTptspp, ASCBptspp, ATPS4rpp, CELBpts, CHTBSptspp, DHAPT, FRUpts2pp, FRUptspp, GALTptspp, GAMptspp, GLCptspp, LDH_D, MALTptspp, MANGLYCptspp, MANptspp, MNLptspp, SBTptspp, SUCptspp, TREptspp
966	-54.8261	EX_succ_e	10.8056	-10	0.0694611	4	31.7019	-5.75177	27.0716	-3.75903	8.38941	b2415, b2788, b3736, b1380	2DGLCptspp, ACGAptspp, ACMANAptspp, ACMUMptspp, ARBTptspp, ASCBptspp, ATPS4rpp, CELBpts, CHTBSptspp, DHAPT, FRUpts2pp, FRUptspp, GALTptspp, GAMptspp, GLCptspp, LDH_D, MALTptspp, MANGLYCptspp, MANptspp, MNLptspp, SBTptspp, SUCptspp, TREptspp
967	-54.8261	EX_succ_e	10.8056	-10	0.0694611	4	31.7019	-5.75177	27.0716	-3.75903	8.38941	b3940, b2415, b3732, b1380	2DGLCptspp, ACGAptspp, ACMANAptspp, ACMUMptspp, ARBTptspp, ASCBptspp, ATPS4rpp, CELBpts, CHTBSptspp, DHAPT, FRUpts2pp, FRUptspp, GALTptspp, GAMptspp, GLCptspp, LDH_D, MALTptspp, MANGLYCptspp, MANptspp, MNLptspp, SBTptspp, SUCptspp, TREptspp
968	-54.8261	EX_succ_e	10.8056	-10	0.0694611	4	31.7019	-5.75177	27.0716	-3.75903	8.38941	b2415, b2429, b3736, b1380	2DGLCptspp, ACGAptspp, ACMANAptspp, ACMUMptspp, ARBTptspp, ASCBptspp, ATPS4rpp, CELBpts, CHTBSptspp, DHAPT, FRUpts2pp, FRUptspp, GALTptspp, GAMptspp, GLCptspp, LDH_D, MALTptspp, MANGLYCptspp, MANptspp, MNLptspp, SBTptspp, SUCptspp, TREptspp
969	-54.8261	EX_succ_e	10.8056	-10	0.0694611	4	31.7019	-5.75177	27.0716	-3.75903	8.38941	b2415, b3732, b4087, b1380	2DGLCptspp, ACGAptspp, ACMANAptspp, ACMUMptspp, ALLabcpp, ARBTptspp, ASCBptspp, ATPS4rpp, CELBpts, CHTBSptspp, DHAPT, FRUpts2pp, FRUptspp, GALTptspp, GAMptspp, GLCptspp, LDH_D, MALTptspp, MANGLYCptspp, MANptspp, MNLptspp, SBTptspp, SUCptspp, TREptspp
970	-54.8261	EX_succ_e	10.8056	-10	0.0694611	4	31.7019	-5.75177	27.0716	-3.75903	8.38941	b2415, b3736, b0854, b1380	2DGLCptspp, ACGAptspp, ACMANAptspp, ACMUMptspp, ARBTptspp, ASCBptspp, ATPS4rpp, CELBpts, CHTBSptspp, DHAPT, FRUpts2pp, FRUptspp, GALTptspp, GAMptspp, GLCptspp, LDH_D, MALTptspp, MANGLYCptspp, MANptspp, MNLptspp, SBTptspp, SUCptspp, TREptspp
971	-54.8261	EX_succ_e	10.8056	-10	0.0694611	4	31.7019	-5.75177	27.0716	-3.75903	8.38941	b2415, b1493, b3736, b1380	2DGLCptspp, ACGAptspp, ACMANAptspp, ACMUMptspp, ARBTptspp, ASCBptspp, ATPS4rpp, CELBpts, CHTBSptspp, DHAPT, FRUpts2pp, FRUptspp, GALTptspp, GAMptspp, GLCptspp, LDH_D, MALTptspp, MANGLYCptspp, MANptspp, MNLptspp, SBTptspp, SUCptspp, TREptspp
972	-54.8261	EX_succ_e	10.8056	-10	0.0694611	4	31.7019	-5.75177	27.0716	-3.75903	8.38941	b2415, b3736, b0341, b1380	2DGLCptspp, ACGAptspp, ACMANAptspp, ACMUMptspp, ARBTptspp, ASCBptspp, ATPS4rpp, CELBpts, CHTBSptspp, CYNTt2pp, DHAPT, FRUpts2pp, FRUptspp, GALTptspp, GAMptspp, GLCptspp, LDH_D, MALTptspp, MANGLYCptspp, MANptspp, MNLptspp, SBTptspp, SUCptspp, TREptspp
973	-54.8261	EX_succ_e	10.8056	-10	0.0694611	4	31.7019	-5.75177	27.0716	-3.75903	8.38941	b2104, b2415, b3732, b1380	2DGLCptspp, ACGAptspp, ACMANAptspp, ACMUMptspp, ARBTptspp, ASCBptspp, ATPS4rpp, CELBpts, CHTBSptspp, DHAPT, FRUpts2pp, FRUptspp, GALTptspp, GAMptspp, GLCptspp, HETZK, LDH_D, MALTptspp, MANGLYCptspp, MANptspp, MNLptspp, SBTptspp, SUCptspp, TREptspp
974	-54.8261	EX_succ_e	10.8056	-10	0.0694611	4	31.7019	-5.75177	27.0716	-3.75903	8.38941	b2415, b3732, b1380, b2765	2DGLCptspp, ACGAptspp, ACMANAptspp, ACMUMptspp, ARBTptspp, ASCBptspp, ATPS4rpp, CELBpts, CHTBSptspp, CPH4S, DHAPT, FRUpts2pp, FRUptspp, GALTptspp, GAMptspp, GLCptspp, LDH_D, MALTptspp, MANGLYCptspp, MANptspp, MNLptspp, SBTptspp, SUCptspp, TREptspp
975	-54.8261	EX_succ_e	10.8056	-10	0.0694611	4	31.7019	-5.75177	27.0716	-3.75903	8.38941	b2415, b3732, b4032, b1380	14GLUCANabcpp, 2DGLCptspp, ACGAptspp, ACMANAptspp, ACMUMptspp, ARBTptspp, ASCBptspp, ATPS4rpp, CELBpts, CHTBSptspp, DHAPT, FRUpts2pp, FRUptspp, GALTptspp, GAMptspp, GLCptspp, LDH_D, MALTHXabcpp, MALTPTabcpp, MALTTRabcpp, MALTTTRabcpp, MALTabcpp, MALTptspp, MANGLYCptspp, MANptspp, MNLptspp, SBTptspp, SUCptspp, TREptspp
976	-54.8261	EX_succ_e	10.8056	-10	0.0694611	4	31.7019	-5.75177	27.0716	-3.75903	8.38941	b2415, b2705, b3736, b1380	2DGLCptspp, ACGAptspp, ACMANAptspp, ACMUMptspp, ARBTptspp, ASCBptspp, ATPS4rpp, CELBpts, CHTBSptspp, DHAPT, FRUpts2pp, FRUptspp, GALTptspp, GAMptspp, GLCptspp, LDH_D, MALTptspp, MANGLYCptspp, MANptspp, MNLptspp, SBTPD, SBTptspp, SUCptspp, TREptspp
977	-54.8261	EX_succ_e	10.8056	-10	0.0694611	4	31.7019	-5.75177	27.0716	-3.75903	8.38941	b2415, b3736, b1440, b1380	2DGLCptspp, ACGAptspp, ACMANAptspp, ACMUMptspp, ARBTptspp, ASCBptspp, ATPS4rpp, CELBpts, CHTBSptspp, DHAPT, FRUpts2pp, FRUptspp, GALTptspp, GAMptspp, GLCptspp, LDH_D, MALTptspp, MANGLYCptspp, MANptspp, MNLptspp, SBTptspp, SUCptspp, TREptspp
978	-54.8261	EX_succ_e	10.8056	-10	0.0694611	4	31.7019	-5.75177	27.0716	-3.75903	8.38941	b1019, b2415, b3736, b1380	2DGLCptspp, ACGAptspp, ACMANAptspp, ACMUMptspp, ARBTptspp, ASCBptspp, ATPS4rpp, CELBpts, CHTBSptspp, DHAPT, FRUpts2pp, FRUptspp, GALTptspp, GAMptspp, GLCptspp, LDH_D, MALTptspp, MANGLYCptspp, MANptspp, MNLptspp, SBTptspp, SUCptspp, TREptspp
979	-54.8261	EX_succ_e	10.8056	-10	0.0694611	4	31.7019	-5.75177	27.0716	-3.75903	8.38941	b2415, b3732, b1380, b2989	2DGLCptspp, ACGAptspp, ACMANAptspp, ACMUMptspp, ARBTptspp, ASCBptspp, ATPS4rpp, CELBpts, CHTBSptspp, DHAPT, FRUpts2pp, FRUptspp, GALTptspp, GAMptspp, GLCptspp, LDH_D, MALTptspp, MANGLYCptspp, MANptspp, MNLptspp, SBTptspp, SUCptspp, TREptspp
980	-54.8261	EX_succ_e	10.8056	-10	0.0694611	4	31.7019	-5.75177	27.0716	-3.75903	8.38941	b2415, b3736, b1380, b1734	2DGLCptspp, ACGAptspp, ACMANAptspp, ACMUMptspp, ARBTptspp, ASCBptspp, ATPS4rpp, CELBpts, CHTBSptspp, DHAPT, FRUpts2pp, FRUptspp, GALTptspp, GAMptspp, GLCptspp, LDH_D, MALTptspp, MANGLYCptspp, MANptspp, MC6PH, MNLptspp, SBTptspp, SUCptspp, TREptspp
981	-54.8261	EX_succ_e	10.8056	-10	0.0694611	4	31.7019	-5.75177	27.0716	-3.75903	8.38941	b2415, b3736, b0842, b1380	2DGLCptspp, ACGAptspp, ACMANAptspp, ACMUMptspp, ARBTptspp, ASCBptspp, ATPS4rpp, CELBpts, CHTBSptspp, DHAPT, FRUpts2pp, FRUptspp, GALTptspp, GAMptspp, GLCptspp, LDH_D, MALTptspp, MANGLYCptspp, MANptspp, MNLptspp, SBTptspp, SUCptspp, TREptspp
982	-54.8261	EX_succ_e	10.8056	-10	0.0694611	4	31.7019	-5.75177	27.0716	-3.75903	8.38941	b4146, b2415, b3732, b1380	2DGLCptspp, ACGAptspp, ACMANAptspp, ACMUMptspp, ARBTptspp, ASCBptspp, ATPS4rpp, CELBpts, CHTBSptspp, DHAPT, FRUpts2pp, FRUptspp, GALTptspp, GAMptspp, GLCptspp, LDH_D, LYSAM, MALTptspp, MANGLYCptspp, MANptspp, MNLptspp, SBTptspp, SUCptspp, TREptspp
983	-54.8261	EX_succ_e	10.8056	-10	0.0694611	4	31.7019	-5.75177	27.0716	-3.75903	8.38941	b2415, b1250, b3736, b1380	2DGLCptspp, ACGAptspp, ACMANAptspp, ACMUMptspp, ARBTptspp, ASCBptspp, ATPS4rpp, CELBpts, CHTBSptspp, DHAPT, FRUpts2pp, FRUptspp, GALTptspp, GAMptspp, GLCptspp, LDH_D, MALTptspp, MANGLYCptspp, MANptspp, MNLptspp, SBTptspp, SUCptspp, TREptspp
984	-54.8261	EX_succ_e	10.8056	-10	0.0694611	4	31.7019	-5.75177	27.0716	-3.75903	8.38941	b2415, b3732, b1380, b0925	2DGLCptspp, ACGAptspp, ACMANAptspp, ACMUMptspp, ARBTptspp, ASCBptspp, ATPS4rpp, CELBpts, CHTBSptspp, DHAPT, FRUpts2pp, FRUptspp, GALTptspp, GAMptspp, GLCptspp, LDH_D, MALTptspp, MANGLYCptspp, MANptspp, MNLptspp, SBTptspp, SUCptspp, TREptspp
985	-54.8261	EX_succ_e	10.8056	-10	0.0694611	4	31.7019	-5.75177	27.0716	-3.75903	8.38941	b2415, b3732, b0308, b1380	2DGLCptspp, ACGAptspp, ACMANAptspp, ACMUMptspp, ARBTptspp, ASCBptspp, ATPS4rpp, CELBpts, CHTBSptspp, DHAPT, FRUpts2pp, FRUptspp, GALTptspp, GAMptspp, GLCptspp, LDH_D, MALTptspp, MANGLYCptspp, MANptspp, MNLptspp, SBTptspp, SUCptspp, TREptspp
986	-54.8261	EX_succ_e	10.8056	-10	0.0694611	4	31.7019	-5.75177	27.0716	-3.75903	8.38941	b2415, b3732, b0811, b1380	2DGLCptspp, ACGAptspp, ACMANAptspp, ACMUMptspp, ARBTptspp, ASCBptspp, ATPS4rpp, CELBpts, CHTBSptspp, DHAPT, FRUpts2pp, FRUptspp, GALTptspp, GAMptspp, GLCptspp, GLNabcpp, LDH_D, MALTptspp, MANGLYCptspp, MANptspp, MNLptspp, SBTptspp, SUCptspp, TREptspp
987	-54.8261	EX_succ_e	10.8056	-10	0.0694611	4	31.7019	-5.75177	27.0716	-3.75903	8.38941	b2415, b3736, b1380, b3893	2DGLCptspp, ACGAptspp, ACMANAptspp, ACMUMptspp, ARBTptspp, ASCBptspp, ATPS4rpp, CELBpts, CHTBSptspp, DHAPT, FRUpts2pp, FRUptspp, GALTptspp, GAMptspp, GLCptspp, LDH_D, MALTptspp, MANGLYCptspp, MANptspp, MNLptspp, SBTptspp, SUCptspp, TREptspp
988	-54.8261	EX_succ_e	10.8056	-10	0.0694611	4	31.7019	-5.75177	27.0716	-3.75903	8.38941	b2415, b3736, b1380, b0314	2DGLCptspp, ACGAptspp, ACMANAptspp, ACMUMptspp, ARBTptspp, ASCBptspp, ATPS4rpp, CELBpts, CHTBSptspp, DHAPT, FRUpts2pp, FRUptspp, GALTptspp, GAMptspp, GLCptspp, LDH_D, MALTptspp, MANGLYCptspp, MANptspp, MNLptspp, SBTptspp, SUCptspp, TREptspp
989	-54.8261	EX_succ_e	10.8056	-10	0.0694611	4	31.7019	-5.75177	27.0716	-3.75903	8.38941	b3425, b2415, b3736, b1380	2DGLCptspp, ACGAptspp, ACMANAptspp, ACMUMptspp, ARBTptspp, ASCBptspp, ATPS4rpp, CELBpts, CHTBSptspp, DHAPT, FRUpts2pp, FRUptspp, GALTptspp, GAMptspp, GLCptspp, LDH_D, MALTptspp, MANGLYCptspp, MANptspp, MNLptspp, SBTptspp, SUCptspp, TREptspp
990	-54.8261	EX_succ_e	10.8056	-10	0.0694611	4	31.7019	-5.75177	27.0716	-3.75903	8.38941	b2415, b3732, b4034, b1380	14GLUCANabcpp, 2DGLCptspp, ACGAptspp, ACMANAptspp, ACMUMptspp, ARBTptspp, ASCBptspp, ATPS4rpp, CELBpts, CHTBSptspp, DHAPT, FRUpts2pp, FRUptspp, GALTptspp, GAMptspp, GLCptspp, LDH_D, MALTHXabcpp, MALTPTabcpp, MALTTRabcpp, MALTTTRabcpp, MALTabcpp, MALTptspp, MANGLYCptspp, MANptspp, MNLptspp, SBTptspp, SUCptspp, TREptspp
991	-54.8261	EX_succ_e	10.8056	-10	0.0694611	4	31.7019	-5.75177	27.0716	-3.75903	8.38941	b2415, b3736, b3503, b1380	2DGLCptspp, ACGAptspp, ACMANAptspp, ACMUMptspp, ARBTptspp, ASCBptspp, ASR, ATPS4rpp, CELBpts, CHTBSptspp, DHAPT, FRUpts2pp, FRUptspp, GALTptspp, GAMptspp, GLCptspp, LDH_D, MALTptspp, MANGLYCptspp, MANptspp, MNLptspp, SBTptspp, SUCptspp, TREptspp
992	-54.8261	EX_succ_e	10.8056	-10	0.0694611	4	31.7019	-5.75177	27.0716	-3.75903	8.38941	b0895, b2415, b3736, b1380	2DGLCptspp, ACGAptspp, ACMANAptspp, ACMUMptspp, ARBTptspp, ASCBptspp, ATPS4rpp, CELBpts, CHTBSptspp, DHAPT, DMSOR2, FRUpts2pp, FRUptspp, GALTptspp, GAMptspp, GLCptspp, LDH_D, MALTptspp, MANGLYCptspp, MANptspp, MNLptspp, SBTptspp, SUCptspp, TMAOR2, TREptspp
993	-54.8261	EX_succ_e	10.8056	-10	0.0694611	4	31.7019	-5.75177	27.0716	-3.75903	8.38941	b2415, b2202, b3732, b1380	2DGLCptspp, ACGAptspp, ACMANAptspp, ACMUMptspp, ARBTptspp, ASCBptspp, ATPS4rpp, CELBpts, CHTBSptspp, DHAPT, FRUpts2pp, FRUptspp, GALTptspp, GAMptspp, GLCptspp, LDH_D, MALTptspp, MANGLYCptspp, MANptspp, MNLptspp, NO3R1bpp, NO3R2bpp, SBTptspp, SUCptspp, TREptspp
994	-54.8261	EX_succ_e	10.8056	-10	0.0694611	4	31.7019	-5.75177	27.0716	-3.75903	8.38941	b2415, b3732, b1380, b0465	2DGLCptspp, ACGAptspp, ACMANAptspp, ACMUMptspp, ARBTptspp, ASCBptspp, ATPS4rpp, CELBpts, CHTBSptspp, DHAPT, FRUpts2pp, FRUptspp, GALTptspp, GAMptspp, GLCptspp, LDH_D, MALTptspp, MANGLYCptspp, MANptspp, MNLptspp, SBTptspp, SUCptspp, TREptspp
995	-54.8261	EX_succ_e	10.8056	-10	0.0694611	4	31.7019	-5.75177	27.0716	-3.75903	8.38941	b3588, b2415, b3736, b1380	2DGLCptspp, ACGAptspp, ACMANAptspp, ACMUMptspp, ARBTptspp, ASCBptspp, ATPS4rpp, CELBpts, CHTBSptspp, DHAPT, FRUpts2pp, FRUptspp, GALTptspp, GAMptspp, GLCptspp, LDH_D, MALTptspp, MANGLYCptspp, MANptspp, MNLptspp, SBTptspp, SUCptspp, TREptspp
996	-54.8261	EX_succ_e	10.8056	-10	0.0694611	4	31.7019	-5.75177	27.0716	-3.75903	8.38941	b2415, b3904, b3736, b1380	2DGLCptspp, ACGAptspp, ACMANAptspp, ACMUMptspp, ARBTptspp, ASCBptspp, ATPS4rpp, CELBpts, CHTBSptspp, DHAPT, FRUpts2pp, FRUptspp, GALTptspp, GAMptspp, GLCptspp, LDH_D, MALTptspp, MANGLYCptspp, MANptspp, MNLptspp, RMK, SBTptspp, SUCptspp, TREptspp
997	-54.8261	EX_succ_e	10.8056	-10	0.0694611	4	31.7019	-5.75177	27.0716	-3.75903	8.38941	b2415, b3551, b3732, b1380	2DGLCptspp, ACGAptspp, ACMANAptspp, ACMUMptspp, ARBTptspp, ASCBptspp, ATPS4rpp, BSORx, BSORy, CELBpts, CHTBSptspp, DHAPT, FRUpts2pp, FRUptspp, GALTptspp, GAMptspp, GLCptspp, LDH_D, MALTptspp, MANGLYCptspp, MANptspp, MNLptspp, SBTptspp, SUCptspp, TREptspp
998	-54.8261	EX_succ_e	10.8056	-10	0.0694611	4	31.7019	-5.75177	27.0716	-3.75903	8.38941	b2415, b3736, b1380, b2895	2DGLCptspp, ACGAptspp, ACMANAptspp, ACMUMptspp, ARBTptspp, ASCBptspp, ATPS4rpp, CELBpts, CHTBSptspp, DHAPT, FRUpts2pp, FRUptspp, GALTptspp, GAMptspp, GLCptspp, LDH_D, MALTptspp, MANGLYCptspp, MANptspp, MNLptspp, SBTptspp, SUCptspp, TREptspp
999	-54.8261	EX_succ_e	10.8056	-10	0.0694611	4	31.7019	-5.75177	27.0716	-3.75903	8.38941	b2464, b2415, b3732, b1380	2DGLCptspp, ACGAptspp, ACMANAptspp, ACMUMptspp, ARBTptspp, ASCBptspp, ATPS4rpp, CELBpts, CHTBSptspp, DHAPT, FRUpts2pp, FRUptspp, GALTptspp, GAMptspp, GLCptspp, LDH_D, MALTptspp, MANGLYCptspp, MANptspp, MNLptspp, SBTptspp, SUCptspp, TREptspp
1000	-54.8261	EX_succ_e	10.8056	-10	0.0694611	4	31.7019	-5.75177	27.0716	-3.75903	8.38941	b2415, b3732, b0936, b1380	2DGLCptspp, ACGAptspp, ACMANAptspp, ACMUMptspp, ARBTptspp, ASCBptspp, ATPS4rpp, CELBpts, CHTBSptspp, DHAPT, ETHSO3abcpp, FRUpts2pp, FRUptspp, GALTptspp, GAMptspp, GLCptspp, LDH_D, MALTptspp, MANGLYCptspp, MANptspp, MNLptspp, MSO3abcpp, SBTptspp, SUCptspp, SULFACabcpp, TREptspp

## Sheet: Deleted reaction duplicates
Rank	Fitness Score	Product	Product flux (mmol/gDW/h	Substrate flux (mmol/gDW/h2	Maximal growth rate (1/h)	Nr of deletions	Minimal ISS at max growth (1e-4 USD/gDW/h)	Minimal ISS at 0 growth (1e-4 USD/gDW/h)	Economic SS at max growth (1e-4 USD/gDW/h)	Environmental SI at max growth (1e-4 USD/gDW/h)2	Social SI at max growth (1e-4 USD/gDW/h)	Gene deletions	Deleted reactions
1	-55.8261	EX_succ_e	10.8056	-10	0.0694611	3	31.7019	-5.75177	27.0716	-3.75903	8.38941	b2415, b3737, b1380	2DGLCptspp, ACGAptspp, ACMANAptspp, ACMUMptspp, ARBTptspp, ASCBptspp, ATPS4rpp, CELBpts, CHTBSptspp, DHAPT, FRUpts2pp, FRUptspp, GALTptspp, GAMptspp, GLCptspp, LDH_D, MALTptspp, MANGLYCptspp, MANptspp, MNLptspp, SBTptspp, SUCptspp, TREptspp
9	-55.1651	EX_succ_e	10.8056	-10	0.0694611	4	31.7019	-5.07369	27.0716	-3.75903	8.38941	b2415, b3732, b1380, b1771	2DGLCptspp, ACGAptspp, ACMANAptspp, ACMUMptspp, ALR2x, ARBTptspp, ASCBptspp, ATPS4rpp, CELBpts, CHTBSptspp, DHAPT, FRUpts2pp, FRUptspp, GALTptspp, GAMptspp, GLCptspp, LDH_D, MALTptspp, MANGLYCptspp, MANptspp, MNLptspp, SBTptspp, SUCptspp, TREptspp
11	-55.1651	EX_succ_e	10.8056	-10	0.0694611	4	31.7019	-5.07369	27.0716	-3.75903	8.38941	b2415, b3945, b3736, b1380	2DGLCptspp, ACGAptspp, ACMANAptspp, ACMUMptspp, ALR4x, APPLDHr, ARBTptspp, ASCBptspp, ATPS4rpp, CELBpts, CHTBSptspp, DHAPT, FRUpts2pp, FRUptspp, GALTptspp, GAMptspp, GLCptspp, GLYCDx, LALDO2x, LDH_D, MALTptspp, MANGLYCptspp, MANptspp, MNLptspp, SBTptspp, SUCptspp, TREptspp
13	-55.1651	EX_succ_e	10.8056	-10	0.0694611	4	31.7019	-5.07369	27.0716	-3.75903	8.38941	b0963, b2415, b3732, b1380	2DGLCptspp, ACGAptspp, ACMANAptspp, ACMUMptspp, ARBTptspp, ASCBptspp, ATPS4rpp, CELBpts, CHTBSptspp, DHAPT, FRUpts2pp, FRUptspp, GALTptspp, GAMptspp, GLCptspp, LDH_D, MALTptspp, MANGLYCptspp, MANptspp, MGSA, MNLptspp, SBTptspp, SUCptspp, TREptspp
15	-54.8475	EX_succ_e	10.8056	-10	0.0694612	4	31.702	-5.70894	27.0716	-3.75904	8.38943	b2415, b2223, b3732, b1380	2DGLCptspp, ACACt2pp, ACGAptspp, ACMANAptspp, ACMUMptspp, ARBTptspp, ASCBptspp, ATPS4rpp, BUTt2rpp, CELBpts, CHTBSptspp, DHAPT, FRUpts2pp, FRUptspp, GALTptspp, GAMptspp, GLCptspp, HEXt2rpp, LDH_D, MALTptspp, MANGLYCptspp, MANptspp, MNLptspp, SBTptspp, SUCptspp, TREptspp
17	-54.8462	EX_succ_e	10.7957	-10	0.068608	4	31.7007	-5.70894	27.0662	-3.75432	8.38878	b3844, b2415, b3732, b1380	2DGLCptspp, ACGAptspp, ACMANAptspp, ACMUMptspp, ARBTptspp, ASCBptspp, ATPS4rpp, CELBpts, CHTBSptspp, DHAPT, FADRx, FE3Ri, FLVRx, FRUpts2pp, FRUptspp, GALTptspp, GAMptspp, GLCptspp, LDH_D, MALTptspp, MANGLYCptspp, MANptspp, MNLptspp, SBTptspp, SUCptspp, TREptspp
19	-54.8266	EX_succ_e	10.8057	-10	0.0694603	4	31.7025	-5.75177	27.072	-3.7591	8.38955	b2415, b3736, b1380, b0155	2DGLCptspp, ACGAptspp, ACMANAptspp, ACMUMptspp, ARBTptspp, ASCBptspp, ATPS4rpp, CELBpts, CHTBSptspp, CLt3_2pp, DHAPT, FRUpts2pp, FRUptspp, GALTptspp, GAMptspp, GLCptspp, LDH_D, MALTptspp, MANGLYCptspp, MANptspp, MNLptspp, SBTptspp, SUCptspp, TREptspp
20	-54.8261	EX_succ_e	10.8056	-10	0.0694611	4	31.7019	-5.75177	27.0716	-3.75903	8.38941	b2415, b4239, b3732, b1380	2DGLCptspp, ACGAptspp, ACMANAptspp, ACMUMptspp, ARBTptspp, ASCBptspp, ATPS4rpp, CELBpts, CHTBSptspp, DHAPT, FRUpts2pp, FRUptspp, GALTptspp, GAMptspp, GLCptspp, LDH_D, MALTptspp, MANGLYCptspp, MANptspp, MNLptspp, SBTptspp, SUCptspp, TRE6PH, TREptspp
22	-54.8261	EX_succ_e	10.8056	-10	0.0694611	4	31.7019	-5.75177	27.0716	-3.75903	8.38941	b2415, b3732, b3650, b1380	2DGLCptspp, ACGAptspp, ACMANAptspp, ACMUMptspp, ARBTptspp, ASCBptspp, ATPS4rpp, CELBpts, CHTBSptspp, DHAPT, FRUpts2pp, FRUptspp, GALTptspp, GAMptspp, GDPTPDP, GLCptspp, LDH_D, MALTptspp, MANGLYCptspp, MANptspp, MNLptspp, PPGPPDP, SBTptspp, SUCptspp, TREptspp
24	-54.8261	EX_succ_e	10.8056	-10	0.0694611	4	31.7019	-5.75177	27.0716	-3.75903	8.38941	b2415, b3732, b0585, b1380	2DGLCptspp, ACGAptspp, ACMANAptspp, ACMUMptspp, ARBTptspp, ASCBptspp, ATPS4rpp, CELBpts, CHTBSptspp, DHAPT, ENTERES, FEENTERES, FRUpts2pp, FRUptspp, GALTptspp, GAMptspp, GLCptspp, LDH_D, MALTptspp, MANGLYCptspp, MANptspp, MNLptspp, SBTptspp, SUCptspp, TREptspp
26	-54.8261	EX_succ_e	10.8056	-10	0.0694611	4	31.7019	-5.75177	27.0716	-3.75903	8.38941	b2415, b3732, b4094, b1380	2DGLCptspp, ACGAptspp, ACMANAptspp, ACMUMptspp, ARBTptspp, ASCBptspp, ATPS4rpp, CELBpts, CHTBSptspp, DHAPT, FRUpts2pp, FRUptspp, GALTptspp, GAMptspp, GLCptspp, LDH_D, MALTptspp, MANGLYCptspp, MANptspp, MNLptspp, R15BPK, SBTptspp, SUCptspp, TREptspp
28	-54.8261	EX_succ_e	10.8056	-10	0.0694611	4	31.7019	-5.75177	27.0716	-3.75903	8.38941	b2415, b2663, b3736, b1380	2DGLCptspp, ABUTt2pp, ACGAptspp, ACMANAptspp, ACMUMptspp, ARBTptspp, ASCBptspp, ATPS4rpp, CELBpts, CHTBSptspp, DHAPT, FRUpts2pp, FRUptspp, GALTptspp, GAMptspp, GLCptspp, LDH_D, MALTptspp, MANGLYCptspp, MANptspp, MNLptspp, SBTptspp, SUCptspp, TREptspp
30	-54.8261	EX_succ_e	10.8056	-10	0.0694611	4	31.7019	-5.75177	27.0716	-3.75903	8.38941	b2415, b1857, b3736, b1380	2DGLCptspp, ACGAptspp, ACMANAptspp, ACMUMptspp, ARBTptspp, ASCBptspp, ATPS4rpp, CELBpts, CHTBSptspp, DHAPT, FRUpts2pp, FRUptspp, GALTptspp, GAMptspp, GLCptspp, LDH_D, MALTptspp, MANGLYCptspp, MANptspp, MNLptspp, SBTptspp, SUCptspp, TREptspp, ZNabcpp
36	-54.8261	EX_succ_e	10.8056	-10	0.0694611	4	31.7019	-5.75177	27.0716	-3.75903	8.38941	b2415, b0978, b3732, b1380	2DGLCptspp, ACGAptspp, ACMANAptspp, ACMUMptspp, ARBTptspp, ASCBptspp, ATPS4rpp, CELBpts, CHTBSptspp, CYTBD2pp, DHAPT, FRUpts2pp, FRUptspp, GALTptspp, GAMptspp, GLCptspp, LDH_D, MALTptspp, MANGLYCptspp, MANptspp, MNLptspp, SBTptspp, SUCptspp, TREptspp
40	-54.8261	EX_succ_e	10.8056	-10	0.0694611	4	31.7019	-5.75177	27.0716	-3.75903	8.38941	b2415, b3732, b1380, b3924	2DGLCptspp, ACGAptspp, ACMANAptspp, ACMUMptspp, ARBTptspp, ASCBptspp, ATPS4rpp, CELBpts, CHTBSptspp, DHAPT, FLDR2, FRUpts2pp, FRUptspp, GALTptspp, GAMptspp, GLCptspp, LDH_D, MALTptspp, MANGLYCptspp, MANptspp, MNLptspp, SBTptspp, SUCptspp, TREptspp
42	-54.8261	EX_succ_e	10.8056	-10	0.0694611	4	31.7019	-5.75177	27.0716	-3.75903	8.38941	b2415, b3736, b1380, b2309	2DGLCptspp, ACGAptspp, ACMANAptspp, ACMUMptspp, ARBTptspp, ASCBptspp, ATPS4rpp, CELBpts, CHTBSptspp, DHAPT, FRUpts2pp, FRUptspp, GALTptspp, GAMptspp, GLCptspp, HISabcpp, LDH_D, MALTptspp, MANGLYCptspp, MANptspp, MNLptspp, SBTptspp, SUCptspp, TREptspp
44	-54.8261	EX_succ_e	10.8056	-10	0.0694611	4	31.7019	-5.75177	27.0716	-3.75903	8.38941	b2415, b3449, b3732, b1380	2DGLCptspp, ACGAptspp, ACMANAptspp, ACMUMptspp, ARBTptspp, ASCBptspp, ATPS4rpp, CELBpts, CHTBSptspp, DHAPT, FRUpts2pp, FRUptspp, GALTptspp, GAMptspp, GLCptspp, GPDDA1, GPDDA2, GPDDA3, GPDDA4, GPDDA5, LDH_D, MALTptspp, MANGLYCptspp, MANptspp, MNLptspp, SBTptspp, SUCptspp, TREptspp
46	-54.8261	EX_succ_e	10.8056	-10	0.0694611	4	31.7019	-5.75177	27.0716	-3.75903	8.38941	b2415, b3732, b1380, b0463	2DGLCptspp, ACGAptspp, ACMANAptspp, ACMUMptspp, ARBTptspp, ASCBptspp, ATPS4rpp, CELBpts, CHTBSptspp, CMtpp, DHAPT, DOXRBCNtpp, FRUpts2pp, FRUptspp, FUSAtpp, GALTptspp, GAMptspp, GLCptspp, LDH_D, MALTptspp, MANGLYCptspp, MANptspp, MINCYCtpp, MNLptspp, NOVBCNtpp, RFAMPtpp, SBTptspp, SUCptspp, TREptspp, TTRCYCtpp
48	-54.8261	EX_succ_e	10.8056	-10	0.0694611	4	31.7019	-5.75177	27.0716	-3.75903	8.38941	b2415, b3736, b1380, b0515	2DGLCptspp, ACGAptspp, ACMANAptspp, ACMUMptspp, ARBTptspp, ASCBptspp, ATPS4rpp, CELBpts, CHTBSptspp, DHAPT, FRUpts2pp, FRUptspp, GALTptspp, GAMptspp, GLCptspp, LDH_D, MALTptspp, MANGLYCptspp, MANptspp, MNLptspp, SBTptspp, SUCptspp, TREptspp, UGCIAMH
49	-54.8261	EX_succ_e	10.8056	-10	0.0694611	4	31.7019	-5.75177	27.0716	-3.75903	8.38941	b2415, b3732, b1380, b0516	2DGLCptspp, ACGAptspp, ACMANAptspp, ACMUMptspp, ALLTAMH2, ARBTptspp, ASCBptspp, ATPS4rpp, CELBpts, CHTBSptspp, DHAPT, FRUpts2pp, FRUptspp, GALTptspp, GAMptspp, GLCptspp, LDH_D, MALTptspp, MANGLYCptspp, MANptspp, MNLptspp, SBTptspp, SUCptspp, TREptspp
50	-54.8261	EX_succ_e	10.8056	-10	0.0694611	4	31.7019	-5.75177	27.0716	-3.75903	8.38941	b0512, b2415, b3732, b1380	2DGLCptspp, ACGAptspp, ACMANAptspp, ACMUMptspp, ALLTN, ARBTptspp, ASCBptspp, ATPS4rpp, CELBpts, CHTBSptspp, DHAPT, FRUpts2pp, FRUptspp, GALTptspp, GAMptspp, GLCptspp, LDH_D, MALTptspp, MANGLYCptspp, MANptspp, MNLptspp, SBTptspp, SUCptspp, TREptspp
54	-54.8261	EX_succ_e	10.8056	-10	0.0694611	4	31.7019	-5.75177	27.0716	-3.75903	8.38941	b2415, b3732, b1119, b1380	2DGLCptspp, ACGAMK, ACGAptspp, ACMANAptspp, ACMUMptspp, ARBTptspp, ASCBptspp, ATPS4rpp, CELBpts, CHTBSptspp, DHAPT, FRUpts2pp, FRUptspp, GALTptspp, GAMptspp, GLCptspp, LDH_D, MALTptspp, MANGLYCptspp, MANptspp, MNLptspp, SBTptspp, SUCptspp, TREptspp
56	-54.8261	EX_succ_e	10.8056	-10	0.0694611	4	31.7019	-5.75177	27.0716	-3.75903	8.38941	b2415, b0433, b3732, b1380	2DGLCptspp, ACGAptspp, ACMANAptspp, ACMUMptspp, AGM3Pt2pp, AGM4Pt2pp, AGMt2pp, ARBTptspp, ASCBptspp, ATPS4rpp, CELBpts, CHTBSptspp, DHAPT, FRUpts2pp, FRUptspp, GALTptspp, GAMptspp, GLCptspp, LDH_D, MALTptspp, MANGLYCptspp, MANptspp, MNLptspp, SBTptspp, SUCptspp, TREptspp
57	-54.8261	EX_succ_e	10.8056	-10	0.0694611	4	31.7019	-5.75177	27.0716	-3.75903	8.38941	b2415, b3732, b1640, b1380	2DGLCptspp, ACGAptspp, ACMANAptspp, ACMUMptspp, ANHMK, ARBTptspp, ASCBptspp, ATPS4rpp, CELBpts, CHTBSptspp, DHAPT, FRUpts2pp, FRUptspp, GALTptspp, GAMptspp, GLCptspp, LDH_D, MALTptspp, MANGLYCptspp, MANptspp, MNLptspp, SBTptspp, SUCptspp, TREptspp
58	-54.8261	EX_succ_e	10.8056	-10	0.0694611	4	31.7019	-5.75177	27.0716	-3.75903	8.38941	b2428, b2415, b3732, b1380	2DGLCptspp, ACGAptspp, ACM6PH, ACMANAptspp, ACMUMptspp, ARBTptspp, ASCBptspp, ATPS4rpp, CELBpts, CHTBSptspp, DHAPT, FRUpts2pp, FRUptspp, GALTptspp, GAMptspp, GLCptspp, LDH_D, MALTptspp, MANGLYCptspp, MANptspp, MNLptspp, SBTptspp, SUCptspp, TREptspp
61	-54.8261	EX_succ_e	10.8056	-10	0.0694611	4	31.7019	-5.75177	27.0716	-3.75903	8.38941	b2415, b0677, b3732, b1380	2DGLCptspp, ACGAptspp, ACMANAptspp, ACMUMptspp, AGDC, ARBTptspp, ASCBptspp, ATPS4rpp, CELBpts, CHTBSptspp, DHAPT, FRUpts2pp, FRUptspp, GALTptspp, GAMptspp, GLCptspp, LDH_D, MALTptspp, MANGLYCptspp, MANptspp, MNLptspp, SBTptspp, SUCptspp, TREptspp
62	-54.8261	EX_succ_e	10.8056	-10	0.0694611	4	31.7019	-5.75177	27.0716	-3.75903	8.38941	b2415, b3732, b1107, b1380	2DGLCptspp, ACGAptspp, ACMANAptspp, ACMUMptspp, AGM3PH, AGM4PH, AGMH, ARBTptspp, ASCBptspp, ATPS4rpp, CELBpts, CHTBSptspp, DHAPT, FRUpts2pp, FRUptspp, GALTptspp, GAMptspp, GLCptspp, LDH_D, MALTptspp, MANGLYCptspp, MANptspp, MNLptspp, SBTptspp, SUCptspp, TREptspp
65	-54.8261	EX_succ_e	10.8056	-10	0.0694611	4	31.7019	-5.75177	27.0716	-3.75903	8.38941	b2415, b3732, b1380, b3546	2DGLCptspp, ACGAptspp, ACMANAptspp, ACMUMptspp, ARBTptspp, ASCBptspp, ATPS4rpp, CELBpts, CHTBSptspp, DHAPT, FRUpts2pp, FRUptspp, GALTptspp, GAMptspp, GLCptspp, LDH_D, MALTptspp, MANGLYCptspp, MANptspp, MNLptspp, PETNT161pp, PETNT181pp, SBTptspp, SUCptspp, TREptspp
67	-54.8261	EX_succ_e	10.8056	-10	0.0694611	4	31.7019	-5.75177	27.0716	-3.75903	8.38941	b2415, b0674, b3732, b1380	2DGLCptspp, ACGAptspp, ACMANAptspp, ACMUMptspp, ARBTptspp, ASCBptspp, ASNS1, ATPS4rpp, CELBpts, CHTBSptspp, DHAPT, FRUpts2pp, FRUptspp, GALTptspp, GAMptspp, GLCptspp, LDH_D, MALTptspp, MANGLYCptspp, MANptspp, MNLptspp, SBTptspp, SUCptspp, TREptspp
69	-54.8261	EX_succ_e	10.8056	-10	0.0694611	4	31.7019	-5.75177	27.0716	-3.75903	8.38941	b2415, b3732, b1533, b1380	2DGLCptspp, ACGAptspp, ACMANAptspp, ACMUMptspp, ARBTptspp, ASCBptspp, ATPS4rpp, CELBpts, CHTBSptspp, DHAPT, FRUpts2pp, FRUptspp, GALTptspp, GAMptspp, GLCptspp, LDH_D, MALTptspp, MANGLYCptspp, MANptspp, MNLptspp, SBTptspp, SERtpp, SUCptspp, TREptspp
71	-54.8261	EX_succ_e	10.8056	-10	0.0694611	4	31.7019	-5.75177	27.0716	-3.75903	8.38941	b3092, b2415, b3736, b1380	2DGLCptspp, ACGAptspp, ACMANAptspp, ACMUMptspp, ARBTptspp, ASCBptspp, ATPS4rpp, CELBpts, CHTBSptspp, DHAPT, FRUpts2pp, FRUptspp, GALTptspp, GAMptspp, GLCptspp, GUI1, GUI2, LDH_D, MALTptspp, MANGLYCptspp, MANptspp, MNLptspp, SBTptspp, SUCptspp, TREptspp
73	-54.8261	EX_succ_e	10.8056	-10	0.0694611	4	31.7019	-5.75177	27.0716	-3.75903	8.38941	b2415, b3732, b1380, b1600	2DGLCptspp, ACGAptspp, ACMANAptspp, ACMUMptspp, ARBTptspp, ASCBptspp, ATPS4rpp, CELBpts, CHTBSptspp, DHAPT, FRUpts2pp, FRUptspp, GALTptspp, GAMptspp, GLCptspp, LDH_D, MALTptspp, MANGLYCptspp, MANptspp, MNLptspp, SBTptspp, SPMDt3pp, SUCptspp, TREptspp
76	-54.8261	EX_succ_e	10.8056	-10	0.0694611	4	31.7019	-5.75177	27.0716	-3.75903	8.38941	b2415, b3457, b3732, b1380	2DGLCptspp, ACGAptspp, ACMANAptspp, ACMUMptspp, ALAabcpp, ARBTptspp, ASCBptspp, ATPS4rpp, CELBpts, CHTBSptspp, DHAPT, FRUpts2pp, FRUptspp, GALTptspp, GAMptspp, GLCptspp, ILEabcpp, LDH_D, LEUabcpp, MALTptspp, MANGLYCptspp, MANptspp, MNLptspp, SBTptspp, SUCptspp, THRabcpp, TREptspp, VALabcpp
84	-54.8261	EX_succ_e	10.8056	-10	0.0694611	4	31.7019	-5.75177	27.0716	-3.75903	8.38941	b2415, b1453, b3736, b1380	2DGLCptspp, ACGAptspp, ACMANAptspp, ACMUMptspp, ARBTptspp, ASCBptspp, ASNt2rpp, ATPS4rpp, CELBpts, CHTBSptspp, DHAPT, FRUpts2pp, FRUptspp, GALTptspp, GAMptspp, GLCptspp, LDH_D, MALTptspp, MANGLYCptspp, MANptspp, MNLptspp, SBTptspp, SUCptspp, TREptspp
85	-54.8261	EX_succ_e	10.8056	-10	0.0694611	4	31.7019	-5.75177	27.0716	-3.75903	8.38941	b2415, b3732, b3265, b1380	2DGLCptspp, ACGAptspp, ACMANAptspp, ACMUMptspp, ARBTptspp, ASCBptspp, ATPS4rpp, CELBpts, CHTBSptspp, DHAPT, FRUpts2pp, FRUptspp, GALTptspp, GAMptspp, GLCptspp, INDOLEt2pp, LDH_D, MALTptspp, MANGLYCptspp, MANptspp, MNLptspp, SBTptspp, SUCptspp, TREptspp
88	-54.8261	EX_succ_e	10.8056	-10	0.0694611	4	31.7019	-5.75177	27.0716	-3.75903	8.38941	b0033, b2415, b3732, b1380	2DGLCptspp, ACGAptspp, ACMANAptspp, ACMUMptspp, ARBTptspp, ASCBptspp, ATPS4rpp, CBPS, CELBpts, CHTBSptspp, DHAPT, FRUpts2pp, FRUptspp, GALTptspp, GAMptspp, GLCptspp, LDH_D, MALTptspp, MANGLYCptspp, MANptspp, MNLptspp, SBTptspp, SUCptspp, TREptspp
92	-54.8261	EX_succ_e	10.8056	-10	0.0694611	4	31.7019	-5.75177	27.0716	-3.75903	8.38941	b2415, b3736, b0343, b1380	2DGLCptspp, ACGAptspp, ACMANAptspp, ACMUMptspp, ARBTptspp, ASCBptspp, ATPS4rpp, CELBpts, CHTBSptspp, DHAPT, FRUpts2pp, FRUptspp, GALTptspp, GAMptspp, GLCptspp, LCTStpp, LDH_D, MALTptspp, MANGLYCptspp, MANptspp, MNLptspp, SBTptspp, SUCptspp, TREptspp
94	-54.8261	EX_succ_e	10.8056	-10	0.0694611	4	31.7019	-5.75177	27.0716	-3.75903	8.38941	b2415, b2964, b3732, b1380	2DGLCptspp, ACGAptspp, ACMANAptspp, ACMUMptspp, ARBTptspp, ASCBptspp, ATPS4rpp, CELBpts, CHTBSptspp, DGSNt2pp, DHAPT, DINSt2pp, FRUpts2pp, FRUptspp, GALTptspp, GAMptspp, GLCptspp, GSNt2pp, LDH_D, MALTptspp, MANGLYCptspp, MANptspp, MNLptspp, SBTptspp, SUCptspp, TREptspp
96	-54.8261	EX_succ_e	10.8056	-10	0.0694611	4	31.7019	-5.75177	27.0716	-3.75903	8.38941	b2415, b3736, b1380, b0514	2DGLCptspp, ACGAptspp, ACMANAptspp, ACMUMptspp, ARBTptspp, ASCBptspp, ATPS4rpp, CELBpts, CHTBSptspp, DHAPT, FRUpts2pp, FRUptspp, GALTptspp, GAMptspp, GLCptspp, GLYCK, LDH_D, MALTptspp, MANGLYCptspp, MANptspp, MNLptspp, SBTptspp, SUCptspp, TREptspp
98	-54.8261	EX_succ_e	10.8056	-10	0.0694611	4	31.7019	-5.75177	27.0716	-3.75903	8.38941	b2415, b4123, b3736, b1380	2DGLCptspp, ACGAptspp, ACMANAptspp, ACMUMptspp, ARBTptspp, ASCBptspp, ATPS4rpp, CELBpts, CHTBSptspp, DHAPT, FRUpts2pp, FRUptspp, GALTptspp, GAMptspp, GLCptspp, LDH_D, MALTptspp, MANGLYCptspp, MANptspp, MNLptspp, SBTptspp, SUCTARTtpp, SUCptspp, TARTt2_3pp, TREptspp
100	-54.8261	EX_succ_e	10.8056	-10	0.0694611	4	31.7019	-5.75177	27.0716	-3.75903	8.38941	b2415, b3732, b1380, b0037	2DGLCptspp, ACGAptspp, ACMANAptspp, ACMUMptspp, ARBTptspp, ASCBptspp, ATPS4rpp, CELBpts, CHTBSptspp, CRNCAL2, CRNDCAL2, CTBTCAL2, DHAPT, FRUpts2pp, FRUptspp, GALTptspp, GAMptspp, GLCptspp, LDH_D, MALTptspp, MANGLYCptspp, MANptspp, MNLptspp, SBTptspp, SUCptspp, TREptspp
102	-54.8261	EX_succ_e	10.8056	-10	0.0694611	4	31.7019	-5.75177	27.0716	-3.75903	8.38941	b2415, b3732, b1380, b4266	2DGLCptspp, 5DGLCNR, ACGAptspp, ACMANAptspp, ACMUMptspp, ARBTptspp, ASCBptspp, ATPS4rpp, CELBpts, CHTBSptspp, DHAPT, FRUpts2pp, FRUptspp, GALTptspp, GAMptspp, GLCptspp, LDH_D, MALTptspp, MANGLYCptspp, MANptspp, MNLptspp, SBTptspp, SUCptspp, TREptspp
104	-54.8261	EX_succ_e	10.8056	-10	0.0694611	4	31.7019	-5.75177	27.0716	-3.75903	8.38941	b0517, b2415, b3732, b1380	2DGLCptspp, ACGAptspp, ACMANAptspp, ACMUMptspp, ARBTptspp, ASCBptspp, ATPS4rpp, CELBpts, CHTBSptspp, DHAPT, FRUpts2pp, FRUptspp, GALTptspp, GAMptspp, GLCptspp, LDH_D, MALTptspp, MANGLYCptspp, MANptspp, MNLptspp, SBTptspp, SUCptspp, TREptspp, URDGLYCD
105	-54.8261	EX_succ_e	10.8056	-10	0.0694611	4	31.7019	-5.75177	27.0716	-3.75903	8.38941	b2415, b3732, b1380, b3116	2DGLCptspp, ACGAptspp, ACMANAptspp, ACMUMptspp, ARBTptspp, ASCBptspp, ATPS4rpp, CELBpts, CHTBSptspp, DHAPT, FRUpts2pp, FRUptspp, GALTptspp, GAMptspp, GLCptspp, LDH_D, MALTptspp, MANGLYCptspp, MANptspp, MNLptspp, SBTptspp, SUCptspp, THRt2rpp, TREptspp
107	-54.8261	EX_succ_e	10.8056	-10	0.0694611	4	31.7019	-5.75177	27.0716	-3.75903	8.38941	b0586, b2415, b3736, b1380	2DGLCptspp, ACGAptspp, ACMANAptspp, ACMUMptspp, ARBTptspp, ASCBptspp, ATPS4rpp, CELBpts, CHTBSptspp, DHAPT, FRUpts2pp, FRUptspp, GALTptspp, GAMptspp, GLCptspp, LDH_D, MALTptspp, MANGLYCptspp, MANptspp, MNLptspp, SBTptspp, SERASr, SUCptspp, TREptspp
108	-54.8261	EX_succ_e	10.8056	-10	0.0694611	4	31.7019	-5.75177	27.0716	-3.75903	8.38941	b0583, b2415, b3732, b1380	2DGLCptspp, ACGAptspp, ACMANAptspp, ACMUMptspp, ARBTptspp, ASCBptspp, ATPS4rpp, CELBpts, CHTBSptspp, DHAPT, ENTCS, FRUpts2pp, FRUptspp, GALTptspp, GAMptspp, GLCptspp, LDH_D, MALTptspp, MANGLYCptspp, MANptspp, MNLptspp, SBTptspp, SUCptspp, TREptspp
109	-54.8261	EX_succ_e	10.8056	-10	0.0694611	4	31.7019	-5.75177	27.0716	-3.75903	8.38941	b2415, b3732, b1380, b0594	2DGLCptspp, ACGAptspp, ACMANAptspp, ACMUMptspp, ARBTptspp, ASCBptspp, ATPS4rpp, CELBpts, CHTBSptspp, DHAPT, DHBS, FRUpts2pp, FRUptspp, GALTptspp, GAMptspp, GLCptspp, LDH_D, MALTptspp, MANGLYCptspp, MANptspp, MNLptspp, SBTptspp, SUCptspp, TREptspp
113	-54.8261	EX_succ_e	10.8056	-10	0.0694611	4	31.7019	-5.75177	27.0716	-3.75903	8.38941	b2415, b3732, b3029, b1380	2DGLCptspp, ACGAptspp, ACMANAptspp, ACMUMptspp, ARBTptspp, ASCBptspp, ATPS4rpp, CELBpts, CHTBSptspp, DHAPT, FRUpts2pp, FRUptspp, GALTptspp, GAMptspp, GLCptspp, LDH_D, MALTptspp, MANGLYCptspp, MANptspp, MNLptspp, QMO2, QMO3, SBTptspp, SUCptspp, TREptspp
115	-54.8261	EX_succ_e	10.8056	-10	0.0694611	4	31.7019	-5.75177	27.0716	-3.75903	8.38941	b2418, b2415, b3732, b1380	2DGLCptspp, ACGAptspp, ACMANAptspp, ACMUMptspp, ARBTptspp, ASCBptspp, ATPS4rpp, CELBpts, CHTBSptspp, DHAPT, FRUpts2pp, FRUptspp, GALTptspp, GAMptspp, GLCptspp, LDH_D, MALTptspp, MANGLYCptspp, MANptspp, MNLptspp, PYDAMK, PYDXNK, SBTptspp, SUCptspp, TREptspp
117	-54.8261	EX_succ_e	10.8056	-10	0.0694611	4	31.7019	-5.75177	27.0716	-3.75903	8.38941	b0030, b2415, b3736, b1380	2DGLCptspp, ACGAptspp, ACMANAptspp, ACMUMptspp, ADNUC, ARBTptspp, ASCBptspp, ATPS4rpp, CELBpts, CHTBSptspp, DHAPT, FRUpts2pp, FRUptspp, GALTptspp, GAMptspp, GLCptspp, INSH, LDH_D, MALTptspp, MANGLYCptspp, MANptspp, MNLptspp, SBTptspp, SUCptspp, TREptspp, XTSNH
119	-54.8261	EX_succ_e	10.8056	-10	0.0694611	4	31.7019	-5.75177	27.0716	-3.75903	8.38941	b0049, b2415, b3732, b1380	2DGLCptspp, ACGAptspp, ACMANAptspp, ACMUMptspp, AP4AH, AP5AH, ARBTptspp, ASCBptspp, ATPS4rpp, CELBpts, CHTBSptspp, DHAPT, FRUpts2pp, FRUptspp, GALTptspp, GAMptspp, GLCptspp, GP4GH, LDH_D, MALTptspp, MANGLYCptspp, MANptspp, MNLptspp, SBTptspp, SUCptspp, TREptspp
121	-54.8261	EX_succ_e	10.8056	-10	0.0694611	4	31.7019	-5.75177	27.0716	-3.75903	8.38941	b2415, b3732, b1380, b4129	2DGLCptspp, ACGAptspp, ACMANAptspp, ACMUMptspp, AP4AS, ARBTptspp, ASCBptspp, ATPS4rpp, CELBpts, CHTBSptspp, DHAPT, FRUpts2pp, FRUptspp, GALTptspp, GAMptspp, GLCptspp, LDH_D, MALTptspp, MANGLYCptspp, MANptspp, MNLptspp, SBTptspp, SUCptspp, TREptspp
123	-54.8261	EX_succ_e	10.8056	-10	0.0694611	4	31.7019	-5.75177	27.0716	-3.75903	8.38941	b2415, b2498, b3732, b1380	2DGLCptspp, ACGAptspp, ACMANAptspp, ACMUMptspp, ARBTptspp, ASCBptspp, ATPS4rpp, CELBpts, CHTBSptspp, DHAPT, FRUpts2pp, FRUptspp, GALTptspp, GAMptspp, GLCptspp, LDH_D, MALTptspp, MANGLYCptspp, MANptspp, MNLptspp, SBTptspp, SUCptspp, TREptspp, UPPRT
124	-54.8261	EX_succ_e	10.8056	-10	0.0694611	4	31.7019	-5.75177	27.0716	-3.75903	8.38941	b2415, b1603, b3732, b1380	2DGLCptspp, ACGAptspp, ACMANAptspp, ACMUMptspp, ARBTptspp, ASCBptspp, ATPS4rpp, CELBpts, CHTBSptspp, DHAPT, FRUpts2pp, FRUptspp, GALTptspp, GAMptspp, GLCptspp, LDH_D, MALTptspp, MANGLYCptspp, MANptspp, MNLptspp, SBTptspp, SUCptspp, THD2pp, TREptspp
128	-54.8261	EX_succ_e	10.8056	-10	0.0694611	4	31.7019	-5.75177	27.0716	-3.75903	8.38941	b2415, b3736, b0612, b1380	2DGLCptspp, ACGAptspp, ACMANAptspp, ACMUMptspp, ARBTptspp, ASCBptspp, ATPS4rpp, CELBpts, CHTBSptspp, CITt7pp, DHAPT, FRUpts2pp, FRUptspp, GALTptspp, GAMptspp, GLCptspp, LDH_D, MALTptspp, MANGLYCptspp, MANptspp, MNLptspp, SBTptspp, SUCptspp, TREptspp
130	-54.8261	EX_succ_e	10.8056	-10	0.0694611	4	31.7019	-5.75177	27.0716	-3.75903	8.38941	b2415, b3732, b1380, b0494	2DGLCptspp, ACGAptspp, ACMANAptspp, ACMUMptspp, ARBTptspp, ASCBptspp, ATPS4rpp, CELBpts, CHTBSptspp, DHAPT, FRUpts2pp, FRUptspp, GALTptspp, GAMptspp, GLCptspp, LDH_D, LPLIPAL1A120pp, LPLIPAL1A140pp, LPLIPAL1A141pp, LPLIPAL1A160pp, LPLIPAL1A161pp, LPLIPAL1A180pp, LPLIPAL1A181pp, LPLIPAL1E120pp, LPLIPAL1E140pp, LPLIPAL1E141pp, LPLIPAL1E160pp, LPLIPAL1E161pp, LPLIPAL1E180pp, LPLIPAL1E181pp, LPLIPAL1…
132	-54.8261	EX_succ_e	10.8056	-10	0.0694611	4	31.7019	-5.75177	27.0716	-3.75903	8.38941	b2415, b3736, b1216, b1380	2DGLCptspp, ACGAptspp, ACMANAptspp, ACMUMptspp, ARBTptspp, ASCBptspp, ATPS4rpp, CA2t3pp, CELBpts, CHTBSptspp, DHAPT, FRUpts2pp, FRUptspp, GALTptspp, GAMptspp, GLCptspp, LDH_D, MALTptspp, MANGLYCptspp, MANptspp, MNLptspp, SBTptspp, SUCptspp, TREptspp
134	-54.8261	EX_succ_e	10.8056	-10	0.0694611	4	31.7019	-5.75177	27.0716	-3.75903	8.38941	b3752, b2415, b3732, b1380	2DGLCptspp, ACGAptspp, ACMANAptspp, ACMUMptspp, ARBTptspp, ASCBptspp, ATPS4rpp, CELBpts, CHTBSptspp, DHAPT, FRUpts2pp, FRUptspp, GALTptspp, GAMptspp, GLCptspp, LDH_D, MALTptspp, MANGLYCptspp, MANptspp, MNLptspp, RBK, SBTptspp, SUCptspp, TREptspp
136	-54.8261	EX_succ_e	10.8056	-10	0.0694611	4	31.7019	-5.75177	27.0716	-3.75903	8.38941	b2415, b3732, b1186, b1380	2DGLCptspp, ACGAptspp, ACMANAptspp, ACMUMptspp, ARBTptspp, ASCBptspp, ATPS4rpp, CELBpts, CHTBSptspp, DHAPT, FRUpts2pp, FRUptspp, GALTptspp, GAMptspp, GLCptspp, LDH_D, MALTptspp, MANGLYCptspp, MANptspp, MNLptspp, NAt3_1p5pp, SBTptspp, SUCptspp, TREptspp
137	-54.8261	EX_succ_e	10.8056	-10	0.0694611	4	31.7019	-5.75177	27.0716	-3.75903	8.38941	b3962, b2415, b3736, b1380	2DGLCptspp, ACGAptspp, ACMANAptspp, ACMUMptspp, ARBTptspp, ASCBptspp, ATPS4rpp, CELBpts, CHTBSptspp, DHAPT, FRUpts2pp, FRUptspp, GALTptspp, GAMptspp, GLCptspp, LDH_D, MALTptspp, MANGLYCptspp, MANptspp, MNLptspp, NADTRHD, SBTptspp, SUCptspp, TREptspp
138	-54.8261	EX_succ_e	10.8056	-10	0.0694611	4	31.7019	-5.75177	27.0716	-3.75903	8.38941	b2415, b3732, b1380, b2328	2DGLCptspp, ACGAptspp, ACMANAptspp, ACMUMptspp, ARBTptspp, ASCBptspp, ATPS4rpp, CELBpts, CHTBSptspp, DHAPT, FRUpts2pp, FRUptspp, GALTptspp, GAMptspp, GLCptspp, LDH_D, MALTptspp, MANGLYCptspp, MANptspp, MLDEP1pp, MLDEP2pp, MNLptspp, SBTptspp, SUCptspp, TREptspp
[truncated: 358 more rows]
