# Supplementary material for: Sustainable Metabolic Engineering Design Development Employing a Complex Objective Function
Source: Preprints.org preprint supplement (doi:10.20944/preprints202305.0094.v1), 2023-05-03
Supplement: Supplementary file 3 [file supplementary › Supplementary materials/S2.xlsx]

## Sheet: Designs 9000 - 10000
Rank	Fitness Score	Product	Product flux (mmol/gDW/h	Substrate flux (mmol/gDW/h2	Maximal growth rate (1/h)	Nr of deletions	Minimal ISS at max growth (1e-4 USD/gDW/h)	Minimal ISS at 0 growth (1e-4 USD/gDW/h)	Economic SI at max growth (1e-4 USD/gDW/h)	Environmental SI at max growth (1e-4 USD/gDW/h)2	Social SI at max growth (1e-4 USD/gDW/h)	Gene deletions	Deleted reactions
9000	-50.5093	EX_succ_e	10.7987	-10	0.0688717	3	30.0307	-13.0428	25.8395	-3.80801	7.99912	b3846, b2415, b3738	2DGLCptspp, ACGAptspp, ACMANAptspp, ACMUMptspp, ARBTptspp, ASCBptspp, ATPS4rpp, CELBpts, CHTBSptspp, CTECOAI6, CTECOAI7, CTECOAI8, DHAPT, FRUpts2pp, FRUptspp, GALTptspp, GAMptspp, GLCptspp, MALTptspp, MANGLYCptspp, MANptspp, MNLptspp, SBTptspp, SUCptspp, TREptspp
9001	-50.5026	EX_succ_e	10.7971	-10	0.0687262	3	30.024	-13.0428	25.8339	-3.80741	7.99751	b0521, b2415, b3732	2DGLCptspp, ACGAptspp, ACMANAptspp, ACMUMptspp, ARBTptspp, ASCBptspp, ATPS4rpp, CBMKr, CELBpts, CHTBSptspp, DHAPT, FRUpts2pp, FRUptspp, GALTptspp, GAMptspp, GLCptspp, MALTptspp, MANGLYCptspp, MANptspp, MNLptspp, SBTptspp, SUCptspp, TREptspp
9002	-50.5026	EX_succ_e	10.7971	-10	0.0687262	3	30.024	-13.0428	25.8339	-3.80741	7.99751	b0521, b2415, b3736	2DGLCptspp, ACGAptspp, ACMANAptspp, ACMUMptspp, ARBTptspp, ASCBptspp, ATPS4rpp, CBMKr, CELBpts, CHTBSptspp, DHAPT, FRUpts2pp, FRUptspp, GALTptspp, GAMptspp, GLCptspp, MALTptspp, MANGLYCptspp, MANptspp, MNLptspp, SBTptspp, SUCptspp, TREptspp
9003	-50.4972	EX_succ_e	10.7957	-10	0.068608	3	30.0186	-13.0428	25.8293	-3.80692	7.9962	b3844, b2415, b3732	2DGLCptspp, ACGAptspp, ACMANAptspp, ACMUMptspp, ARBTptspp, ASCBptspp, ATPS4rpp, CELBpts, CHTBSptspp, DHAPT, FADRx, FE3Ri, FLVRx, FRUpts2pp, FRUptspp, GALTptspp, GAMptspp, GLCptspp, MALTptspp, MANGLYCptspp, MANptspp, MNLptspp, SBTptspp, SUCptspp, TREptspp
9004	-50.4972	EX_succ_e	10.7957	-10	0.068608	3	30.0186	-13.0428	25.8293	-3.80692	7.9962	b3844, b2415, b3736	2DGLCptspp, ACGAptspp, ACMANAptspp, ACMUMptspp, ARBTptspp, ASCBptspp, ATPS4rpp, CELBpts, CHTBSptspp, DHAPT, FADRx, FE3Ri, FLVRx, FRUpts2pp, FRUptspp, GALTptspp, GAMptspp, GLCptspp, MALTptspp, MANGLYCptspp, MANptspp, MNLptspp, SBTptspp, SUCptspp, TREptspp
9005	-50.4687	EX_succ_e	10.7785	-10	0.0671254	3	29.951	-12.9646	25.7719	-3.80078	7.97983	b4025, b1852, b3736	ATPS4rpp, G6PDH2r, PGI
9006	-50.4687	EX_succ_e	10.7785	-10	0.0671254	3	29.951	-12.9646	25.7719	-3.80078	7.97983	b2415, b1852, b3736	2DGLCptspp, ACGAptspp, ACMANAptspp, ACMUMptspp, ARBTptspp, ASCBptspp, ATPS4rpp, CELBpts, CHTBSptspp, DHAPT, FRUpts2pp, FRUptspp, G6PDH2r, GALTptspp, GAMptspp, GLCptspp, MALTptspp, MANGLYCptspp, MANptspp, MNLptspp, SBTptspp, SUCptspp, TREptspp
9007	-50.4687	EX_succ_e	10.7785	-10	0.0671254	3	29.951	-12.9646	25.7719	-3.80078	7.97983	b0767, b2415, b3732	2DGLCptspp, ACGAptspp, ACMANAptspp, ACMUMptspp, ARBTptspp, ASCBptspp, ATPS4rpp, CELBpts, CHTBSptspp, DHAPT, FRUpts2pp, FRUptspp, GALTptspp, GAMptspp, GLCptspp, MALTptspp, MANGLYCptspp, MANptspp, MNLptspp, PGL, SBTptspp, SUCptspp, TREptspp
9008	-50.4687	EX_succ_e	10.7785	-10	0.0671254	3	29.951	-12.9646	25.7719	-3.80078	7.97983	b2415, b1852, b3738	2DGLCptspp, ACGAptspp, ACMANAptspp, ACMUMptspp, ARBTptspp, ASCBptspp, ATPS4rpp, CELBpts, CHTBSptspp, DHAPT, FRUpts2pp, FRUptspp, G6PDH2r, GALTptspp, GAMptspp, GLCptspp, MALTptspp, MANGLYCptspp, MANptspp, MNLptspp, SBTptspp, SUCptspp, TREptspp
9009	-50.4687	EX_succ_e	10.7785	-10	0.0671254	3	29.951	-12.9646	25.7719	-3.80078	7.97983	b0767, b2415, b3736	2DGLCptspp, ACGAptspp, ACMANAptspp, ACMUMptspp, ARBTptspp, ASCBptspp, ATPS4rpp, CELBpts, CHTBSptspp, DHAPT, FRUpts2pp, FRUptspp, GALTptspp, GAMptspp, GLCptspp, MALTptspp, MANGLYCptspp, MANptspp, MNLptspp, PGL, SBTptspp, SUCptspp, TREptspp
9010	-50.4687	EX_succ_e	10.7785	-10	0.0671254	3	29.951	-12.9646	25.7719	-3.80078	7.97983	b2029, b2415, b3732	2DGLCptspp, ACGAptspp, ACMANAptspp, ACMUMptspp, ARBTptspp, ASCBptspp, ATPS4rpp, CELBpts, CHTBSptspp, DHAPT, FRUpts2pp, FRUptspp, GALTptspp, GAMptspp, GLCptspp, GND, MALTptspp, MANGLYCptspp, MANptspp, MNLptspp, SBTptspp, SUCptspp, TREptspp
9011	-50.4687	EX_succ_e	10.7785	-10	0.0671254	3	29.951	-12.9646	25.7719	-3.80078	7.97983	b2029, b2415, b3736	2DGLCptspp, ACGAptspp, ACMANAptspp, ACMUMptspp, ARBTptspp, ASCBptspp, ATPS4rpp, CELBpts, CHTBSptspp, DHAPT, FRUpts2pp, FRUptspp, GALTptspp, GAMptspp, GLCptspp, GND, MALTptspp, MANGLYCptspp, MANptspp, MNLptspp, SBTptspp, SUCptspp, TREptspp
9012	-50.4635	EX_succ_e	10.7872	-10	0.0693866	3	29.9849	-13.0428	25.8008	-3.80399	7.98808	b2415, b3736, b2413	2DGLCptspp, ACGAptspp, ACMANAptspp, ACMUMptspp, ARBTptspp, ASCBptspp, ATPS4rpp, CELBpts, CHTBSptspp, DHAPT, FRUpts2pp, FRUptspp, GALTptspp, GAMptspp, GLCptspp, MALTptspp, MANGLYCptspp, MANptspp, MNLptspp, SBTptspp, SO4t2pp, SUCptspp, TREptspp
9013	-50.4635	EX_succ_e	10.7872	-10	0.0693866	3	29.9849	-13.0428	25.8008	-3.80399	7.98808	b2415, b3738, b2413	2DGLCptspp, ACGAptspp, ACMANAptspp, ACMUMptspp, ARBTptspp, ASCBptspp, ATPS4rpp, CELBpts, CHTBSptspp, DHAPT, FRUpts2pp, FRUptspp, GALTptspp, GAMptspp, GLCptspp, MALTptspp, MANGLYCptspp, MANptspp, MNLptspp, SBTptspp, SO4t2pp, SUCptspp, TREptspp
9014	-50.4524	EX_succ_e	10.7843	-10	0.0676256	3	29.9738	-13.0428	25.7913	-3.80285	7.98536	b2415, b3732, b1695	2DGLCptspp, ACGAptspp, ACMANAptspp, ACMUMptspp, ACOAD1fr, ARBTptspp, ASCBptspp, ATPS4rpp, CELBpts, CHTBSptspp, DHAPT, FRUpts2pp, FRUptspp, GALTptspp, GAMptspp, GLCptspp, MALTptspp, MANGLYCptspp, MANptspp, MNLptspp, SBTptspp, SUCptspp, TREptspp
9015	-50.4524	EX_succ_e	10.7843	-10	0.0676256	3	29.9738	-13.0428	25.7913	-3.80285	7.98536	b2415, b3738, b1695	2DGLCptspp, ACGAptspp, ACMANAptspp, ACMUMptspp, ACOAD1fr, ARBTptspp, ASCBptspp, ATPS4rpp, CELBpts, CHTBSptspp, DHAPT, FRUpts2pp, FRUptspp, GALTptspp, GAMptspp, GLCptspp, MALTptspp, MANGLYCptspp, MANptspp, MNLptspp, SBTptspp, SUCptspp, TREptspp
9016	-50.4524	EX_succ_e	10.7843	-10	0.0676256	3	29.9738	-13.0428	25.7913	-3.80285	7.98536	b2415, b3736, b0452	2DGLCptspp, ACGAptspp, ACMANAptspp, ACMUMptspp, ARBTptspp, ASCBptspp, ATPS4rpp, CELBpts, CHTBSptspp, DHAPT, FACOAE100, FACOAE120, FACOAE140, FACOAE141, FACOAE160, FACOAE161, FACOAE180, FACOAE181, FACOAE60, FACOAE80, FRUpts2pp, FRUptspp, GALTptspp, GAMptspp, GLCptspp, MALTptspp, MANGLYCptspp, MANptspp, MNLptspp, SBTptspp, SUCptspp, TREptspp
9017	-50.4524	EX_succ_e	10.7843	-10	0.0676256	3	29.9738	-13.0428	25.7913	-3.80285	7.98536	b2415, b3732, b0221	2DGLCptspp, ACGAptspp, ACMANAptspp, ACMUMptspp, ACOAD1f, ACOAD2f, ACOAD3f, ACOAD4f, ACOAD5f, ACOAD6f, ACOAD7f, ACOAD8f, ARBTptspp, ASCBptspp, ATPS4rpp, CELBpts, CHTBSptspp, DHAPT, FRUpts2pp, FRUptspp, GALTptspp, GAMptspp, GLCptspp, MALTptspp, MANGLYCptspp, MANptspp, MNLptspp, SBTptspp, SUCptspp, TREptspp
9018	-50.4524	EX_succ_e	10.7843	-10	0.0676256	3	29.9738	-13.0428	25.7913	-3.80285	7.98536	b2415, b3736, b0221	2DGLCptspp, ACGAptspp, ACMANAptspp, ACMUMptspp, ACOAD1f, ACOAD2f, ACOAD3f, ACOAD4f, ACOAD5f, ACOAD6f, ACOAD7f, ACOAD8f, ARBTptspp, ASCBptspp, ATPS4rpp, CELBpts, CHTBSptspp, DHAPT, FRUpts2pp, FRUptspp, GALTptspp, GAMptspp, GLCptspp, MALTptspp, MANGLYCptspp, MANptspp, MNLptspp, SBTptspp, SUCptspp, TREptspp
9019	-50.4524	EX_succ_e	10.7843	-10	0.0676257	3	29.9738	-13.0428	25.7913	-3.80284	7.98535	b2836, b2415, b3732	2AGPEAT120, 2AGPEAT140, 2AGPEAT141, 2AGPEAT160, 2AGPEAT161, 2AGPEAT180, 2AGPEAT181, 2AGPGAT120, 2AGPGAT140, 2AGPGAT141, 2AGPGAT160, 2AGPGAT161, 2AGPGAT180, 2AGPGAT181, 2DGLCptspp, AACPS1, AACPS2, AACPS3, AACPS4, AACPS5, AACPS6, AACPS7, AACPS8, AACPS9, ACGAptspp, ACMANAptspp, ACMUMptspp, ARBTptspp, ASCBptspp, ATPS4rpp, CELBpts, CHTBSptspp, DHAPT, FRUpts2pp, FRUptspp, GALTptspp, GAMptspp, GLCptspp,…
9020	-50.4524	EX_succ_e	10.7843	-10	0.0676257	3	29.9738	-13.0428	25.7913	-3.80284	7.98535	b2836, b2415, b3736	2AGPEAT120, 2AGPEAT140, 2AGPEAT141, 2AGPEAT160, 2AGPEAT161, 2AGPEAT180, 2AGPEAT181, 2AGPGAT120, 2AGPGAT140, 2AGPGAT141, 2AGPGAT160, 2AGPGAT161, 2AGPGAT180, 2AGPGAT181, 2DGLCptspp, AACPS1, AACPS2, AACPS3, AACPS4, AACPS5, AACPS6, AACPS7, AACPS8, AACPS9, ACGAptspp, ACMANAptspp, ACMUMptspp, ARBTptspp, ASCBptspp, ATPS4rpp, CELBpts, CHTBSptspp, DHAPT, FRUpts2pp, FRUptspp, GALTptspp, GAMptspp, GLCptspp,…
9021	-50.4524	EX_succ_e	10.7843	-10	0.0676257	3	29.9738	-13.0428	25.7913	-3.80284	7.98535	b2836, b2415, b3738	2AGPEAT120, 2AGPEAT140, 2AGPEAT141, 2AGPEAT160, 2AGPEAT161, 2AGPEAT180, 2AGPEAT181, 2AGPGAT120, 2AGPGAT140, 2AGPGAT141, 2AGPGAT160, 2AGPGAT161, 2AGPGAT180, 2AGPGAT181, 2DGLCptspp, AACPS1, AACPS2, AACPS3, AACPS4, AACPS5, AACPS6, AACPS7, AACPS8, AACPS9, ACGAptspp, ACMANAptspp, ACMUMptspp, ARBTptspp, ASCBptspp, ATPS4rpp, CELBpts, CHTBSptspp, DHAPT, FRUpts2pp, FRUptspp, GALTptspp, GAMptspp, GLCptspp,…
9022	-50.4487	EX_succ_e	10.7833	-10	0.0675436	3	29.9701	-13.0428	25.7881	-3.80251	7.98445	b2415, b4388, b3732	2DGLCptspp, ACGAptspp, ACMANAptspp, ACMUMptspp, ARBTptspp, ASCBptspp, ATPS4rpp, CELBpts, CHTBSptspp, DHAPT, FRUpts2pp, FRUptspp, GALTptspp, GAMptspp, GLCptspp, MALTptspp, MANGLYCptspp, MANptspp, MNLptspp, PSP_L, SBTptspp, SUCptspp, TREptspp
9023	-50.4487	EX_succ_e	10.7833	-10	0.0675436	3	29.9701	-13.0428	25.7881	-3.80251	7.98445	b2415, b2913, b3736	2DGLCptspp, ACGAptspp, ACMANAptspp, ACMUMptspp, AHGDx, ARBTptspp, ARHGDx, ASCBptspp, ATPS4rpp, CELBpts, CHTBSptspp, DHAPT, FRUpts2pp, FRUptspp, GALTptspp, GAMptspp, GLCptspp, MALTptspp, MANGLYCptspp, MANptspp, MNLptspp, PGCD, SBTptspp, SUCptspp, TREptspp
9024	-50.4487	EX_succ_e	10.7833	-10	0.0675435	3	29.9701	-13.0428	25.7881	-3.80251	7.98445	b0907, b2415, b3732	2DGLCptspp, ACGAptspp, ACMANAptspp, ACMUMptspp, ARBTptspp, ASCBptspp, ATPS4rpp, CELBpts, CHTBSptspp, DHAPT, FRUpts2pp, FRUptspp, GALTptspp, GAMptspp, GLCptspp, MALTptspp, MANGLYCptspp, MANptspp, MNLptspp, OHPBAT, PSERT, SBTptspp, SUCptspp, TREptspp
9025	-50.1869	EX_succ_e	10.3909	-10	0.0713224	7	30.372	-6.37027	25.9093	-3.60324	8.06601	b0894, b4025, b2988, b2428, b3063, b3736, b1380	ACM6PH, ATPS4rpp, DMSOR2, GSPMDA, GSPMDS, LDH_D, PGI, TARTRt7pp, TMAOR2
9026	-50.1869	EX_succ_e	10.3909	-10	0.0713224	7	30.372	-6.37027	25.9093	-3.60324	8.06601	b4025, b1238, b2888, b3736, b2253, b2552, b1380	ATPS4rpp, DURIK1, LDH_D, NODOx, NODOy, PGI, TMDK1, UDPKAAT, URATEtpp
9027	-50.1869	EX_succ_e	10.3909	-10	0.0713224	7	30.372	-6.37027	25.9093	-3.60324	8.06601	b4025, b3736, b3390, b4288, b4035, b1380, b0605	14GLUCANabcpp, ATPS4rpp, FE3DCITabcpp, LDH_D, MALTHXabcpp, MALTPTabcpp, MALTTRabcpp, MALTTTRabcpp, MALTabcpp, NADHPO, PGI
9028	-50.1869	EX_succ_e	10.3909	-10	0.0713224	7	30.372	-6.37027	25.9093	-3.60324	8.06601	b4025, b0517, b3061, b3736, b0197, b1380, b1388	ATPS4rpp, LDH_D, METDabcpp, METabcpp, PACCOAE, PGI, TARTD, URDGLYCD
9029	-50.1869	EX_succ_e	10.3909	-10	0.0713224	7	30.372	-6.37027	25.9093	-3.60324	8.06601	b4025, b0573, b3736, b4067, b1380, b1771, b3924	ACt4pp, AGt3, ALR2x, ATPS4rpp, CUt3, FLDR2, GLYCLTt4pp, LDH_D, PGI
9030	-50.1869	EX_succ_e	10.3909	-10	0.0713224	7	30.372	-6.37027	25.9093	-3.60324	8.06601	b4025, b2988, b3063, b3736, b3734, b3626, b1380	ATPS4rpp, GLCTR3, GSPMDA, GSPMDS, LDH_D, PGI, TARTRt7pp
9031	-49.6229	EX_succ_e	10.3909	-10	0.0713224	2	28.4133	-13.5807	24.4689	-3.66449	7.60885	b4025, b3733	ATPS4rpp, PGI
9032	-49.6229	EX_succ_e	10.3909	-10	0.0713224	2	28.4133	-13.5807	24.4689	-3.66449	7.60885	b4025, b3732	ATPS4rpp, PGI
9033	-49.6229	EX_succ_e	10.3909	-10	0.0713224	2	28.4133	-13.5807	24.4689	-3.66449	7.60885	b4025, b3736	ATPS4rpp, PGI
9034	-49.6229	EX_succ_e	10.3909	-10	0.0713224	2	28.4133	-13.5807	24.4689	-3.66449	7.60885	b4025, b3735	ATPS4rpp, PGI
9035	-49.6229	EX_succ_e	10.3909	-10	0.0713224	2	28.4133	-13.5807	24.4689	-3.66449	7.60885	b4025, b3737	ATPS4rpp, PGI
9036	-49.5368	EX_succ_e	10.8057	-10	0.0694603	4	30.0582	-13.0428	25.8629	-3.81052	8.00579	b1587, b2415, b3732, b0155	2DGLCptspp, ACGAptspp, ACMANAptspp, ACMUMptspp, ARBTptspp, ASCBptspp, ATPS4rpp, CELBpts, CHTBSptspp, CLt3_2pp, DHAPT, FRUpts2pp, FRUptspp, GALTptspp, GAMptspp, GLCptspp, MALTptspp, MANGLYCptspp, MANptspp, MNLptspp, SBTptspp, SELR, SUCptspp, TREptspp
9037	-49.5368	EX_succ_e	10.8057	-10	0.0694603	4	30.0582	-13.0428	25.8629	-3.81052	8.00579	b2415, b0383, b3736, b0155	2DGLCptspp, ACGAptspp, ACMANAptspp, ACMUMptspp, ACP1p, ARBTptspp, ASCBptspp, ATPS4rpp, CELBpts, CHTBSptspp, CLt3_2pp, DHAPT, FRUpts2pp, FRUptspp, GALTptspp, GAMptspp, GLCptspp, MALTptspp, MANGLYCptspp, MANptspp, MNLptspp, PPTHpp, SBTptspp, SUCptspp, TREptspp
9038	-49.5362	EX_succ_e	10.8056	-10	0.0694612	4	30.0576	-13.0428	25.8624	-3.81046	8.00564	b2415, b2223, b3732, b0353	2DGLCptspp, ACACt2pp, ACGAptspp, ACMANAptspp, ACMUMptspp, ARBTptspp, ASCBptspp, ATPS4rpp, BUTt2rpp, CELBpts, CHTBSptspp, DHAPT, FRUpts2pp, FRUptspp, GALTptspp, GAMptspp, GLCptspp, HCINNMt2rpp, HEXt2rpp, HPPPNt2rpp, MALTptspp, MANGLYCptspp, MANptspp, MNLptspp, SBTptspp, SUCptspp, TREptspp
9039	-49.5361	EX_succ_e	10.8056	-10	0.0694611	4	30.0575	-13.0428	25.8624	-3.81046	8.00562	b2415, b3736, b3631, b0662	2DGLCptspp, ACGAptspp, ACMANAptspp, ACMUMptspp, ARBTptspp, ASCBptspp, ATPS4rpp, CELBpts, CHTBSptspp, DHAPT, FRUpts2pp, FRUptspp, GALTptspp, GAMptspp, GLCTR1, GLCptspp, MALTptspp, MANGLYCptspp, MANptspp, MNLptspp, OMMBLHXy, SBTptspp, SUCptspp, TREptspp
9040	-49.5361	EX_succ_e	10.8056	-10	0.0694611	4	30.0575	-13.0428	25.8624	-3.81046	8.00562	b2415, b3732, b2129, b0830	2DGLCptspp, ACGAptspp, ACMANAptspp, ACMUMptspp, ARBTptspp, ASCBptspp, ATPS4rpp, CELBpts, CHLabcpp, CHTBSptspp, DHAPT, FRUpts2pp, FRUptspp, GALTptspp, GAMptspp, GLCptspp, GTHRDabcpp, MALTptspp, MANGLYCptspp, MANptspp, MNLptspp, SBTptspp, SUCptspp, TREptspp
9041	-49.5361	EX_succ_e	10.8056	-10	0.0694611	4	30.0575	-13.0428	25.8624	-3.81046	8.00562	b2415, b3736, b2914, b0404	2DGLCptspp, ACGAptspp, ACMANAptspp, ACMUMptspp, ARBTptspp, ASCBptspp, ATPS4rpp, CELBpts, CHTBSptspp, DHAPT, FA100ACPHi, FA120ACPHi, FA140ACPHi, FA141ACPHi, FA160ACPHi, FA161ACPHi, FA80ACPHi, FRUpts2pp, FRUptspp, GALTptspp, GAMptspp, GLCptspp, MALTptspp, MANGLYCptspp, MANptspp, MNLptspp, SBTptspp, SUCptspp, TREptspp
9042	-49.5361	EX_succ_e	10.8056	-10	0.0694611	4	30.0575	-13.0428	25.8624	-3.81046	8.00562	b2415, b3224, b3732, b0404	2DGLCptspp, ACGAptspp, ACMANAptspp, ACMUMptspp, ACNAMt2pp, ARBTptspp, ASCBptspp, ATPS4rpp, CELBpts, CHTBSptspp, DHAPT, FA100ACPHi, FA120ACPHi, FA140ACPHi, FA141ACPHi, FA160ACPHi, FA161ACPHi, FA80ACPHi, FRUpts2pp, FRUptspp, GALTptspp, GAMptspp, GLCptspp, MALTptspp, MANGLYCptspp, MANptspp, MNLptspp, SBTptspp, SUCptspp, TREptspp
9043	-49.5361	EX_succ_e	10.8056	-10	0.0694611	4	30.0575	-13.0428	25.8624	-3.81046	8.00562	b2415, b3738, b0404, b2794	2DGLCptspp, ACGAptspp, ACMANAptspp, ACMUMptspp, ARBTptspp, ASCBptspp, ATPS4rpp, CDGR, CELBpts, CHTBSptspp, DHAPT, FA100ACPHi, FA120ACPHi, FA140ACPHi, FA141ACPHi, FA160ACPHi, FA161ACPHi, FA80ACPHi, FRUpts2pp, FRUptspp, GALTptspp, GAMptspp, GLCptspp, MALTptspp, MANGLYCptspp, MANptspp, MNLptspp, SBTptspp, SUCptspp, TREptspp
9044	-49.5361	EX_succ_e	10.8056	-10	0.0694611	4	30.0575	-13.0428	25.8624	-3.81046	8.00562	b2415, b2261, b3736, b2927	2DGLCptspp, ACGAptspp, ACMANAptspp, ACMUMptspp, ARBTptspp, ASCBptspp, ATPS4rpp, CELBpts, CHTBSptspp, DHAPT, FRUpts2pp, FRUptspp, GALTptspp, GAMptspp, GLCptspp, MALTptspp, MANGLYCptspp, MANptspp, MNLptspp, SBTptspp, SUCBZS, SUCptspp, TREptspp
9045	-49.5361	EX_succ_e	10.8056	-10	0.0694611	4	30.0575	-13.0428	25.8624	-3.81046	8.00562	b2415, b3732, b2134, b2264	2DGLCptspp, ACGAptspp, ACMANAptspp, ACMUMptspp, ARBTptspp, ASCBptspp, ATPS4rpp, CELBpts, CHTBSptspp, DHAPT, FRUpts2pp, FRUptspp, GALTptspp, GAMptspp, GLCptspp, MALTptspp, MANGLYCptspp, MANptspp, MNLptspp, SBTptspp, SEPHCHCS, SUCptspp, TREptspp
9046	-49.5361	EX_succ_e	10.8056	-10	0.0694611	4	30.0575	-13.0428	25.8624	-3.81046	8.00562	b2415, b3736, b3735, b1686	2DGLCptspp, ACGAptspp, ACMANAptspp, ACMUMptspp, ARBTptspp, ASCBptspp, ATPS4rpp, CELBpts, CHTBSptspp, DHAPT, DHNCOAT, FRUpts2pp, FRUptspp, GALTptspp, GAMptspp, GLCptspp, MALTptspp, MANGLYCptspp, MANptspp, MNLptspp, SBTptspp, SUCptspp, TREptspp
9047	-49.5361	EX_succ_e	10.8056	-10	0.0694611	4	30.0575	-13.0428	25.8624	-3.81046	8.00562	b2415, b1805, b3732, b2262	2DGLCptspp, ACGAptspp, ACMANAptspp, ACMUMptspp, ARBTptspp, ASCBptspp, ATPS4rpp, CELBpts, CHTBSptspp, DHAPT, DHNCOAS, FRUpts2pp, FRUptspp, GALTptspp, GAMptspp, GLCptspp, MALTptspp, MANGLYCptspp, MANptspp, MNLptspp, SBTptspp, SUCptspp, TREptspp
9048	-49.5361	EX_succ_e	10.8056	-10	0.0694611	4	30.0575	-13.0428	25.8624	-3.81046	8.00562	b2415, b2724, b3736, b2262	2DGLCptspp, ACGAptspp, ACMANAptspp, ACMUMptspp, ARBTptspp, ASCBptspp, ATPS4rpp, CELBpts, CHTBSptspp, DHAPT, DHNCOAS, FRUpts2pp, FRUptspp, GALTptspp, GAMptspp, GLCptspp, MALTptspp, MANGLYCptspp, MANptspp, MNLptspp, SBTptspp, SUCptspp, TREptspp
9049	-49.5361	EX_succ_e	10.8056	-10	0.0694611	4	30.0575	-13.0428	25.8624	-3.81046	8.00562	b2415, b3736, b0451, b3930	2DGLCptspp, ACGAptspp, ACMANAptspp, ACMUMptspp, ARBTptspp, ASCBptspp, ATPS4rpp, CELBpts, CHTBSptspp, DHAPT, DHNAOT4, FRUpts2pp, FRUptspp, GALTptspp, GAMptspp, GLCptspp, MALTptspp, MANGLYCptspp, MANptspp, MNLptspp, SBTptspp, SUCptspp, TREptspp
9050	-49.5361	EX_succ_e	10.8056	-10	0.0694611	4	30.0575	-13.0428	25.8624	-3.81046	8.00562	b2415, b2261, b3736, b0425	2DGLCptspp, ACGAptspp, ACMANAptspp, ACMUMptspp, ARBTptspp, ASCBptspp, ATPS4rpp, CELBpts, CHTBSptspp, DHAPT, FRUpts2pp, FRUptspp, GALTptspp, GAMptspp, GLCptspp, MALTptspp, MANGLYCptspp, MANptspp, MNLptspp, SBTptspp, SUCBZS, SUCptspp, TREptspp
9051	-49.5361	EX_succ_e	10.8056	-10	0.0694611	4	30.0575	-13.0428	25.8624	-3.81046	8.00562	b2415, b2261, b3738, b1490	2DGLCptspp, ACGAptspp, ACMANAptspp, ACMUMptspp, ARBTptspp, ASCBptspp, ATPS4rpp, CELBpts, CHTBSptspp, DHAPT, FRUpts2pp, FRUptspp, GALTptspp, GAMptspp, GLCptspp, MALTptspp, MANGLYCptspp, MANptspp, MNLptspp, SBTptspp, SUCBZS, SUCptspp, TREptspp
9052	-49.5361	EX_succ_e	10.8056	-10	0.0694611	4	30.0575	-13.0428	25.8624	-3.81046	8.00562	b2415, b2261, b3736, b0613	2DGLCptspp, ACGAptspp, ACMANAptspp, ACMUMptspp, ARBTptspp, ASCBptspp, ATPS4rpp, CELBpts, CHTBSptspp, DHAPT, FRUpts2pp, FRUptspp, GALTptspp, GAMptspp, GLCptspp, MALTptspp, MANGLYCptspp, MANptspp, MNLptspp, SBTptspp, SUCBZS, SUCptspp, TPRDCOAS, TREptspp
9053	-49.5361	EX_succ_e	10.8056	-10	0.0694611	4	30.0575	-13.0428	25.8624	-3.81046	8.00562	b2415, b3736, b3860, b1686	2DGLCptspp, ACGAptspp, ACMANAptspp, ACMUMptspp, ARBTptspp, ASCBptspp, ATPS4rpp, CELBpts, CHTBSptspp, DHAPT, DHNCOAT, DSBAO1, DSBAO2, FRUpts2pp, FRUptspp, GALTptspp, GAMptspp, GLCptspp, MALTptspp, MANGLYCptspp, MANptspp, MNLptspp, SBTptspp, SUCptspp, TREptspp
9054	-49.5361	EX_succ_e	10.8056	-10	0.0694611	4	30.0575	-13.0428	25.8624	-3.81046	8.00562	b2502, b2415, b3732, b2263	2DGLCptspp, ACGAptspp, ACMANAptspp, ACMUMptspp, ARBTptspp, ASCBptspp, ATPS4rpp, CELBpts, CHTBSptspp, DHAPT, FRUpts2pp, FRUptspp, GALTptspp, GAMptspp, GLCptspp, MALTptspp, MANGLYCptspp, MANptspp, MNLptspp, SBTptspp, SHCHCS3, SUCptspp, TREptspp
9055	-49.5361	EX_succ_e	10.8056	-10	0.0694611	4	30.0575	-13.0428	25.8624	-3.81046	8.00562	b2415, b2261, b1329, b3736	2DGLCptspp, ACGAptspp, ACMANAptspp, ACMUMptspp, ARBTptspp, ASCBptspp, ATPS4rpp, CELBpts, CHTBSptspp, DHAPT, FRUpts2pp, FRUptspp, GALTptspp, GAMptspp, GLCptspp, MALTptspp, MANGLYCptspp, MANptspp, MNLptspp, SBTptspp, SUCBZS, SUCptspp, TREptspp
9056	-49.5361	EX_succ_e	10.8056	-10	0.0694611	4	30.0575	-13.0428	25.8624	-3.81046	8.00562	b2415, b3732, b1801, b2263	2DGLCptspp, ACGAptspp, ACMANAptspp, ACMUMptspp, ARBTptspp, ASCBptspp, ATPS4rpp, CELBpts, CHTBSptspp, DHAPT, FRUpts2pp, FRUptspp, GALTptspp, GAMptspp, GLCptspp, MALTptspp, MANGLYCptspp, MANptspp, MNLptspp, SBTptspp, SHCHCS3, SUCptspp, TREptspp
9057	-49.5361	EX_succ_e	10.8056	-10	0.0694611	4	30.0575	-13.0428	25.8624	-3.81046	8.00562	b2415, b4131, b3736, b2260	2DGLCptspp, ACGAptspp, ACMANAptspp, ACMUMptspp, ARBTptspp, ASCBptspp, ATPS4rpp, CELBpts, CHTBSptspp, DHAPT, FRUpts2pp, FRUptspp, GALTptspp, GAMptspp, GLCptspp, MALTptspp, MANGLYCptspp, MANptspp, MNLptspp, SBTptspp, SUCBZL, SUCptspp, TREptspp
9058	-49.5361	EX_succ_e	10.8056	-10	0.0694611	4	30.0575	-13.0428	25.8624	-3.81046	8.00562	b2415, b3732, b3738, b1686	2DGLCptspp, ACGAptspp, ACMANAptspp, ACMUMptspp, ARBTptspp, ASCBptspp, ATPS4rpp, CELBpts, CHTBSptspp, DHAPT, DHNCOAT, FRUpts2pp, FRUptspp, GALTptspp, GAMptspp, GLCptspp, MALTptspp, MANGLYCptspp, MANptspp, MNLptspp, SBTptspp, SUCptspp, TREptspp
9059	-49.5361	EX_succ_e	10.8056	-10	0.0694611	4	30.0575	-13.0428	25.8624	-3.81046	8.00562	b0099, b2415, b2261, b3732	2DGLCptspp, ACGAptspp, ACMANAptspp, ACMUMptspp, ARBTptspp, ASCBptspp, ATPS4rpp, CELBpts, CHTBSptspp, DHAPT, FRUpts2pp, FRUptspp, GALTptspp, GAMptspp, GLCptspp, MALTptspp, MANGLYCptspp, MANptspp, MNLptspp, SBTptspp, SUCBZS, SUCptspp, TREptspp
9060	-49.5361	EX_succ_e	10.8056	-10	0.0694611	4	30.0575	-13.0428	25.8624	-3.81046	8.00562	b2415, b3732, b1102, b1186	2DGLCptspp, ACGAptspp, ACMANAptspp, ACMUMptspp, ARBTptspp, ASCBptspp, ATPS4rpp, CELBpts, CHTBSptspp, CPGNtonex, DHAPT, FRUpts2pp, FRUptspp, GALTptspp, GAMptspp, GLCptspp, MALTptspp, MANGLYCptspp, MANptspp, MNLptspp, NAt3_1p5pp, SBTptspp, SUCptspp, TREptspp
9061	-49.5361	EX_succ_e	10.8056	-10	0.0694611	4	30.0575	-13.0428	25.8624	-3.81046	8.00562	b2415, b3732, b0197, b1528	2DGLCptspp, ACGAptspp, ACMANAptspp, ACMUMptspp, ARBTptspp, ARBt3ipp, ASCBptspp, ATPS4rpp, CELBpts, CHTBSptspp, DHAPT, FRUpts2pp, FRUptspp, GALTptspp, GAMptspp, GLCptspp, MALTptspp, MANGLYCptspp, MANptspp, MELIBt3ipp, METDabcpp, METabcpp, MNLptspp, SBTptspp, SUCptspp, TREptspp
9062	-49.5361	EX_succ_e	10.8056	-10	0.0694611	4	30.0575	-13.0428	25.8624	-3.81046	8.00562	b2415, b3738, b3451, b0009	2DGLCptspp, ACGAptspp, ACMANAptspp, ACMUMptspp, ARBTptspp, ASCBptspp, ATPS4rpp, CELBpts, CHTBSptspp, DHAPT, FRUpts2pp, FRUptspp, G3PCabcpp, G3PEabcpp, G3PGabcpp, G3PIabcpp, G3PSabcpp, GALTptspp, GAMptspp, GLCptspp, GLYC2Pabcpp, GLYC3Pabcpp, MALTptspp, MANGLYCptspp, MANptspp, MNLptspp, MPTAT, SBTptspp, SUCptspp, TREptspp
9063	-49.5361	EX_succ_e	10.8056	-10	0.0694611	4	30.0575	-13.0428	25.8624	-3.81046	8.00562	b2415, b0674, b1291, b3736	2DGLCptspp, ACGAptspp, ACMANAptspp, ACMUMptspp, ARBTptspp, ASCBptspp, ASNS1, ATPS4rpp, CELBpts, CHTBSptspp, DHAPT, FRUpts2pp, FRUptspp, GALTptspp, GAMptspp, GLCptspp, MALTptspp, MANGLYCptspp, MANptspp, MNLptspp, SBTptspp, SUCptspp, TREptspp
9064	-49.5361	EX_succ_e	10.8056	-10	0.0694611	4	30.0575	-13.0428	25.8624	-3.81046	8.00562	b3951, b2415, b0674, b3732	2DGLCptspp, ACGAptspp, ACMANAptspp, ACMUMptspp, ARBTptspp, ASCBptspp, ASNS1, ATPS4rpp, CELBpts, CHTBSptspp, DHAPT, FRUpts2pp, FRUptspp, GALTptspp, GAMptspp, GLCptspp, MALTptspp, MANGLYCptspp, MANptspp, MNLptspp, SBTptspp, SUCptspp, TREptspp
9065	-49.5361	EX_succ_e	10.8056	-10	0.0694611	4	30.0575	-13.0428	25.8624	-3.81046	8.00562	b2415, b3736, b1539, b0118	2DGLCptspp, ACGAptspp, ACMANAptspp, ACMUMptspp, ARBTptspp, ASCBptspp, ATHRDHr, ATPS4rpp, CELBpts, CHTBSptspp, DHAPT, DSERDHr, FRUpts2pp, FRUptspp, GALTptspp, GAMptspp, GLCptspp, LSERDHr, MALTptspp, MANGLYCptspp, MANptspp, MICITDr, MNLptspp, SBTptspp, SUCptspp, TREptspp
9066	-49.5361	EX_succ_e	10.8056	-10	0.0694611	4	30.0575	-13.0428	25.8624	-3.81046	8.00562	b2415, b1872, b3736, b1533	2DGLCptspp, ACGAptspp, ACMANAptspp, ACMUMptspp, ARBTptspp, ASCBptspp, ATPS4rpp, CELBpts, CHTBSptspp, DHAPT, DMSOR1pp, DMSOR2pp, FRUpts2pp, FRUptspp, GALTptspp, GAMptspp, GLCptspp, MALTptspp, MANGLYCptspp, MANptspp, MNLptspp, SBTptspp, SERtpp, SUCptspp, TREptspp
9067	-49.5361	EX_succ_e	10.8056	-10	0.0694611	4	30.0575	-13.0428	25.8624	-3.81046	8.00562	b2415, b3736, b1900, b1090	2DGLCptspp, ACGAptspp, ACMANAptspp, ACMUMptspp, ACPPAT120, ACPPAT140, ACPPAT141, ACPPAT160, ACPPAT161, ACPPAT180, ACPPAT181, ARBTptspp, ARBabcpp, ASCBptspp, ATPS4rpp, CELBpts, CHTBSptspp, DHAPT, FRUpts2pp, FRUptspp, GALTptspp, GAMptspp, GLCptspp, MALTptspp, MANGLYCptspp, MANptspp, MNLptspp, SBTptspp, SUCptspp, TREptspp
9068	-49.5361	EX_succ_e	10.8056	-10	0.0694611	4	30.0575	-13.0428	25.8624	-3.81046	8.00562	b1590, b2415, b3732, b4036	14GLUCANtexi, 2DGLCptspp, ACGAptspp, ACMANAptspp, ACMUMptspp, ARBTptspp, ASCBptspp, ATPS4rpp, CELBpts, CHTBSptspp, DHAPT, FRUpts2pp, FRUptspp, GALTptspp, GAMptspp, GLCptspp, GLCtex_copy1, MALTHXtexi, MALTPTtexi, MALTTRtexi, MALTTTRtexi, MALTptspp, MALTtexi, MANGLYCptspp, MANptspp, MNLptspp, SBTptspp, SELR, SUCptspp, TREptspp
9069	-49.5361	EX_succ_e	10.8056	-10	0.0694611	4	30.0575	-13.0428	25.8624	-3.81046	8.00562	b2415, b3732, b4036, b3001	14GLUCANtexi, 2DGLCptspp, ACGAptspp, ACMANAptspp, ACMUMptspp, ARBTptspp, ASCBptspp, ATPS4rpp, CELBpts, CHTBSptspp, DHAPT, FRUpts2pp, FRUptspp, GALTptspp, GAMptspp, GLCptspp, GLCtex_copy1, MALTHXtexi, MALTPTtexi, MALTTRtexi, MALTTTRtexi, MALTptspp, MALTtexi, MANGLYCptspp, MANptspp, MNLptspp, SBTptspp, SUCptspp, TREptspp
9070	-49.5361	EX_succ_e	10.8056	-10	0.0694611	4	30.0575	-13.0428	25.8624	-3.81046	8.00562	b2415, b3736, b4036, b2470	14GLUCANtexi, 2DGLCptspp, ACGAptspp, ACMANAptspp, ACMUMptspp, ARBTptspp, ASCBptspp, ATPS4rpp, CELBpts, CHTBSptspp, DHAPT, FRUpts2pp, FRUptspp, GALTptspp, GAMptspp, GLCptspp, GLCtex_copy1, MALTHXtexi, MALTPTtexi, MALTTRtexi, MALTTTRtexi, MALTptspp, MALTtexi, MANGLYCptspp, MANptspp, MNLptspp, SBTptspp, SUCptspp, TREptspp
9071	-49.5361	EX_succ_e	10.8056	-10	0.0694611	4	30.0575	-13.0428	25.8624	-3.81046	8.00562	b4053, b2415, b3732, b4036	14GLUCANtexi, 2DGLCptspp, ACGAptspp, ACMANAptspp, ACMUMptspp, ARBTptspp, ASCBptspp, ATPS4rpp, CELBpts, CHTBSptspp, DHAPT, FRUpts2pp, FRUptspp, GALTptspp, GAMptspp, GLCptspp, GLCtex_copy1, MALTHXtexi, MALTPTtexi, MALTTRtexi, MALTTTRtexi, MALTptspp, MALTtexi, MANGLYCptspp, MANptspp, MNLptspp, SBTptspp, SUCptspp, TREptspp
9072	-49.5361	EX_succ_e	10.8056	-10	0.0694611	4	30.0575	-13.0428	25.8624	-3.81046	8.00562	b2415, b3736, b3390, b4036	14GLUCANtexi, 2DGLCptspp, ACGAptspp, ACMANAptspp, ACMUMptspp, ARBTptspp, ASCBptspp, ATPS4rpp, CELBpts, CHTBSptspp, DHAPT, FRUpts2pp, FRUptspp, GALTptspp, GAMptspp, GLCptspp, GLCtex_copy1, MALTHXtexi, MALTPTtexi, MALTTRtexi, MALTTTRtexi, MALTptspp, MALTtexi, MANGLYCptspp, MANptspp, MNLptspp, SBTptspp, SUCptspp, TREptspp
9073	-49.5361	EX_succ_e	10.8056	-10	0.0694611	4	30.0575	-13.0428	25.8624	-3.81046	8.00562	b3752, b2407, b2415, b3736	2DGLCptspp, ACGAptspp, ACMANAptspp, ACMUMptspp, ARBTptspp, ASCBptspp, ATPS4rpp, CELBpts, CHTBSptspp, DHAPT, FRUpts2pp, FRUptspp, GALTptspp, GAMptspp, GLCptspp, MALTptspp, MANGLYCptspp, MANptspp, MNLptspp, PUNP7, RBK, SBTptspp, SUCptspp, TREptspp
9074	-49.5361	EX_succ_e	10.8056	-10	0.0694611	4	30.0575	-13.0428	25.8624	-3.81046	8.00562	b2415, b3736, b1015, b0724	2DGLCptspp, ACGAptspp, ACMANAptspp, ACMUMptspp, ARBTptspp, ASCBptspp, ATPS4rpp, CELBpts, CHTBSptspp, DHAPT, FRUpts2pp, FRUptspp, GALTptspp, GAMptspp, GLCptspp, MALTptspp, MANGLYCptspp, MANptspp, MNLptspp, PPAt4pp, PROt4pp, SBTptspp, SUCDi, SUCptspp, TREptspp
9075	-49.5361	EX_succ_e	10.8056	-10	0.0694611	4	30.0575	-13.0428	25.8624	-3.81046	8.00562	b3916, b3091, b2415, b3732	2DGLCptspp, ACGAptspp, ACMANAptspp, ACMUMptspp, ALTRH, ARBTptspp, ASCBptspp, ATPS4rpp, CELBpts, CHTBSptspp, DHAPT, FRUpts2pp, FRUptspp, GALTptspp, GAMptspp, GLCptspp, MALTptspp, MANGLYCptspp, MANptspp, MNLptspp, PFK_2, PFK_3, SBTptspp, SUCptspp, TREptspp
9076	-49.5361	EX_succ_e	10.8056	-10	0.0694611	4	30.0575	-13.0428	25.8624	-3.81046	8.00562	b2415, b3453, b3738, b3241	2DGLCptspp, 4HBZt3pp, ACGAptspp, ACMANAptspp, ACMUMptspp, ARBTptspp, ASCBptspp, ATPS4rpp, CELBpts, CHTBSptspp, DHAPT, FRUpts2pp, FRUptspp, G3PCabcpp, G3PEabcpp, G3PGabcpp, G3PIabcpp, G3PSabcpp, GALTptspp, GAMptspp, GLCptspp, GLYC2Pabcpp, GLYC3Pabcpp, MALTptspp, MANGLYCptspp, MANptspp, MNLptspp, SBTptspp, SUCptspp, TREptspp
9077	-49.5361	EX_succ_e	10.8056	-10	0.0694611	4	30.0575	-13.0428	25.8624	-3.81046	8.00562	b2415, b1064, b3732, b3453	2DGLCptspp, ACGAptspp, ACMANAptspp, ACMUMptspp, ARBTptspp, ASCBptspp, ASR, ATPS4rpp, CELBpts, CHTBSptspp, DHAPT, FRUpts2pp, FRUptspp, G3PCabcpp, G3PEabcpp, G3PGabcpp, G3PIabcpp, G3PSabcpp, GALTptspp, GAMptspp, GLCptspp, GLYC2Pabcpp, GLYC3Pabcpp, MALTptspp, MANGLYCptspp, MANptspp, MNLptspp, SBTptspp, SUCptspp, TREptspp
9078	-49.5361	EX_succ_e	10.8056	-10	0.0694611	4	30.0575	-13.0428	25.8624	-3.81046	8.00562	b2415, b3736, b3451, b1008	2DGLCptspp, ACGAptspp, ACMANAptspp, ACMUMptspp, ARBTptspp, ASCBptspp, ATPS4rpp, CELBpts, CHTBSptspp, DHAPT, FRUpts2pp, FRUptspp, G3PCabcpp, G3PEabcpp, G3PGabcpp, G3PIabcpp, G3PSabcpp, GALTptspp, GAMptspp, GLCptspp, GLYC2Pabcpp, GLYC3Pabcpp, MALTptspp, MANGLYCptspp, MANptspp, MNLptspp, SBTptspp, SUCptspp, TREptspp
9079	-49.5361	EX_succ_e	10.8056	-10	0.0694611	4	30.0575	-13.0428	25.8624	-3.81046	8.00562	b2415, b3736, b3450, b0353	2DGLCptspp, ACGAptspp, ACMANAptspp, ACMUMptspp, ARBTptspp, ASCBptspp, ATPS4rpp, CELBpts, CHTBSptspp, DHAPT, FRUpts2pp, FRUptspp, G3PCabcpp, G3PEabcpp, G3PGabcpp, G3PIabcpp, G3PSabcpp, GALTptspp, GAMptspp, GLCptspp, GLYC2Pabcpp, GLYC3Pabcpp, HCINNMt2rpp, HPPPNt2rpp, MALTptspp, MANGLYCptspp, MANptspp, MNLptspp, SBTptspp, SUCptspp, TREptspp
9080	-49.5361	EX_succ_e	10.8056	-10	0.0694611	4	30.0575	-13.0428	25.8624	-3.81046	8.00562	b2415, b3738, b3451, b2344	2DGLCptspp, ACGAptspp, ACMANAptspp, ACMUMptspp, ARBTptspp, ASCBptspp, ATPS4rpp, CELBpts, CHTBSptspp, DDCAtexi, DHAPT, FRUpts2pp, FRUptspp, G3PCabcpp, G3PEabcpp, G3PGabcpp, G3PIabcpp, G3PSabcpp, GALTptspp, GAMptspp, GLCptspp, GLYC2Pabcpp, GLYC3Pabcpp, HDCAtexi, HDCEAtexi, MALTptspp, MANGLYCptspp, MANptspp, MNLptspp, OCDCAtexi, OCDCEAtexi, SBTptspp, SUCptspp, TREptspp, TTDCAtexi, TTDCEAtexi
9081	-49.5361	EX_succ_e	10.8056	-10	0.0694611	4	30.0575	-13.0428	25.8624	-3.81046	8.00562	b2415, b3224, b3453, b3738	2DGLCptspp, ACGAptspp, ACMANAptspp, ACMUMptspp, ACNAMt2pp, ARBTptspp, ASCBptspp, ATPS4rpp, CELBpts, CHTBSptspp, DHAPT, FRUpts2pp, FRUptspp, G3PCabcpp, G3PEabcpp, G3PGabcpp, G3PIabcpp, G3PSabcpp, GALTptspp, GAMptspp, GLCptspp, GLYC2Pabcpp, GLYC3Pabcpp, MALTptspp, MANGLYCptspp, MANptspp, MNLptspp, SBTptspp, SUCptspp, TREptspp
9082	-49.5361	EX_succ_e	10.8056	-10	0.0694611	4	30.0575	-13.0428	25.8624	-3.81046	8.00562	b2415, b3732, b3451, b3477	2DGLCptspp, ACGAptspp, ACMANAptspp, ACMUMptspp, ARBTptspp, ASCBptspp, ATPS4rpp, CELBpts, CHTBSptspp, DHAPT, FRUpts2pp, FRUptspp, G3PCabcpp, G3PEabcpp, G3PGabcpp, G3PIabcpp, G3PSabcpp, GALTptspp, GAMptspp, GLCptspp, GLYC2Pabcpp, GLYC3Pabcpp, MALTptspp, MANGLYCptspp, MANptspp, MNLptspp, SBTptspp, SUCptspp, TREptspp
9083	-49.5361	EX_succ_e	10.8056	-10	0.0694611	4	30.0575	-13.0428	25.8624	-3.81046	8.00562	b2415, b2342, b3736, b3451	2DGLCptspp, ACGAptspp, ACMANAptspp, ACMUMptspp, ARBTptspp, ASCBptspp, ATPS4rpp, CELBpts, CHTBSptspp, DHAPT, FRUpts2pp, FRUptspp, G3PCabcpp, G3PEabcpp, G3PGabcpp, G3PIabcpp, G3PSabcpp, GALTptspp, GAMptspp, GLCptspp, GLYC2Pabcpp, GLYC3Pabcpp, MALTptspp, MANGLYCptspp, MANptspp, MNLptspp, SBTptspp, SUCptspp, TREptspp
9084	-49.5361	EX_succ_e	10.8056	-10	0.0694611	4	30.0575	-13.0428	25.8624	-3.81046	8.00562	b1398, b2415, b3732, b4020	2DGLCptspp, ACGAptspp, ACMANAptspp, ACMUMptspp, ARBTptspp, ASCBptspp, ATPS4rpp, CELBpts, CHTBSptspp, DHAPT, FRUpts2pp, FRUptspp, GALTptspp, GAMptspp, GLCptspp, MALTptspp, MANGLYCptspp, MANptspp, MNLptspp, PACCOAL, PItpp, SBTptspp, SUCptspp, TREptspp
9085	-49.5361	EX_succ_e	10.8056	-10	0.0694611	4	30.0575	-13.0428	25.8624	-3.81046	8.00562	b0894, b2415, b0104, b3736	2DGLCptspp, ACGAptspp, ACMANAptspp, ACMUMptspp, ARBTptspp, ASCBptspp, ATPS4rpp, CELBpts, CHTBSptspp, DHAPT, DMSOR2, FRUpts2pp, FRUptspp, GALTptspp, GAMptspp, GLCptspp, GMPR, MALTptspp, MANGLYCptspp, MANptspp, MNLptspp, SBTptspp, SUCptspp, TMAOR2, TREptspp
9086	-49.5361	EX_succ_e	10.8056	-10	0.0694611	4	30.0575	-13.0428	25.8624	-3.81046	8.00562	b2415, b0104, b3517, b3738	2DGLCptspp, ACGAptspp, ACMANAptspp, ACMUMptspp, ARBTptspp, ASCBptspp, ATPS4rpp, CELBpts, CHTBSptspp, DHAPT, FRUpts2pp, FRUptspp, GALTptspp, GAMptspp, GLCptspp, GMPR, MALTptspp, MANGLYCptspp, MANptspp, MNLptspp, SBTptspp, SUCptspp, TREptspp
9087	-49.5361	EX_succ_e	10.8056	-10	0.0694611	4	30.0575	-13.0428	25.8624	-3.81046	8.00562	b3903, b2415, b3732, b3662	2DGLCptspp, ACGAptspp, ACMANAptspp, ACMUMptspp, ARBTptspp, ASCBptspp, ATPS4rpp, CELBpts, CHTBSptspp, DHAPT, FRUpts2pp, FRUptspp, GALTptspp, GAMptspp, GLCptspp, GSNt3pp, INSt3pp, LYXI, MALTptspp, MANGLYCptspp, MANptspp, MNLptspp, RMI, SBTptspp, SUCptspp, TREptspp
9088	-49.5361	EX_succ_e	10.8056	-10	0.0694611	4	30.0575	-13.0428	25.8624	-3.81046	8.00562	b2415, b3732, b1492, b1185	2DGLCptspp, ACGAptspp, ACMANAptspp, ACMUMptspp, ARBTptspp, ASCBptspp, ATPS4rpp, CELBpts, CHTBSptspp, DHAPT, DSBAO1, DSBAO2, FRUpts2pp, FRUptspp, GALTptspp, GAMptspp, GLCptspp, GLUABUTt7pp, MALTptspp, MANGLYCptspp, MANptspp, MNLptspp, SBTptspp, SUCptspp, TREptspp
9089	-49.5361	EX_succ_e	10.8056	-10	0.0694611	4	30.0575	-13.0428	25.8624	-3.81046	8.00562	b2415, b2307, b3736, b3370	2DGLCptspp, ACGAptspp, ACMANAptspp, ACMUMptspp, ARBTptspp, ASCBptspp, ATPS4rpp, CELBpts, CHTBSptspp, DHAPT, FRULYSt2pp, FRUpts2pp, FRUptspp, GALTptspp, GAMptspp, GLCptspp, HISabcpp, LYSabcpp, MALTptspp, MANGLYCptspp, MANptspp, MNLptspp, ORNabcpp, PSCLYSt2pp, SBTptspp, SUCptspp, TREptspp
9090	-49.5361	EX_succ_e	10.8056	-10	0.0694611	4	30.0575	-13.0428	25.8624	-3.81046	8.00562	b2415, b2307, b3738, b1619	2DGLCptspp, ACGAptspp, ACMANAptspp, ACMUMptspp, ARBTptspp, ASCBptspp, ATPS4rpp, CELBpts, CHOLID, CHTBSptspp, DHAPT, FRUpts2pp, FRUptspp, GALTptspp, GAMptspp, GLCptspp, HISabcpp, LYSabcpp, MALTptspp, MANGLYCptspp, MANptspp, MNLptspp, ORNabcpp, SBTptspp, SUCptspp, TREptspp
9091	-49.5361	EX_succ_e	10.8056	-10	0.0694611	4	30.0575	-13.0428	25.8624	-3.81046	8.00562	b3670, b2415, b2307, b3738	2DGLCptspp, ACGAptspp, ACMANAptspp, ACMUMptspp, ARBTptspp, ASCBptspp, ATPS4rpp, CELBpts, CHTBSptspp, DHAPT, FRUpts2pp, FRUptspp, GALTptspp, GAMptspp, GLCptspp, HISabcpp, LYSabcpp, MALTptspp, MANGLYCptspp, MANptspp, MNLptspp, ORNabcpp, SBTptspp, SUCptspp, TREptspp
9092	-49.5361	EX_succ_e	10.8056	-10	0.0694611	4	30.0575	-13.0428	25.8624	-3.81046	8.00562	b2415, b2307, b1761, b3738	2DGLCptspp, ACGAptspp, ACMANAptspp, ACMUMptspp, ARBTptspp, ASCBptspp, ATPS4rpp, CELBpts, CHTBSptspp, DHAPT, FRUpts2pp, FRUptspp, GALTptspp, GAMptspp, GLCptspp, HISabcpp, LYSabcpp, MALTptspp, MANGLYCptspp, MANptspp, MNLptspp, ORNabcpp, SBTptspp, SUCptspp, TREptspp
9093	-49.5361	EX_succ_e	10.8056	-10	0.0694611	4	30.0575	-13.0428	25.8624	-3.81046	8.00562	b2415, b2307, b3732, b0854	2DGLCptspp, ACGAptspp, ACMANAptspp, ACMUMptspp, ARBTptspp, ASCBptspp, ATPS4rpp, CELBpts, CHTBSptspp, DHAPT, FRUpts2pp, FRUptspp, GALTptspp, GAMptspp, GLCptspp, HISabcpp, LYSabcpp, MALTptspp, MANGLYCptspp, MANptspp, MNLptspp, ORNabcpp, SBTptspp, SUCptspp, TREptspp
9094	-49.5361	EX_succ_e	10.8056	-10	0.0694611	4	30.0575	-13.0428	25.8624	-3.81046	8.00562	b2415, b4381, b3736, b3732	2DGLCptspp, ACGAptspp, ACMANAptspp, ACMUMptspp, ARBTptspp, ASCBptspp, ATPS4rpp, CELBpts, CHTBSptspp, DHAPT, DRPA, FRUpts2pp, FRUptspp, GALTptspp, GAMptspp, GLCptspp, MALTptspp, MANGLYCptspp, MANptspp, MNLptspp, SBTptspp, SUCptspp, TREptspp
9095	-49.5361	EX_succ_e	10.8056	-10	0.0694611	4	30.0575	-13.0428	25.8624	-3.81046	8.00562	b2415, b2291, b4381, b3732	2DGLCptspp, ACGAptspp, ACMANAptspp, ACMUMptspp, ARBTptspp, ASCBptspp, ATPS4rpp, CELBpts, CHTBSptspp, DHAPT, DRPA, FRUpts2pp, FRUptspp, GALTptspp, GAMptspp, GLCptspp, MALTptspp, MANGLYCptspp, MANptspp, MNLptspp, SBTptspp, SUCptspp, TREptspp
9096	-49.5361	EX_succ_e	10.8056	-10	0.0694611	4	30.0575	-13.0428	25.8624	-3.81046	8.00562	b2415, b2705, b4381, b3732	2DGLCptspp, ACGAptspp, ACMANAptspp, ACMUMptspp, ARBTptspp, ASCBptspp, ATPS4rpp, CELBpts, CHTBSptspp, DHAPT, DRPA, FRUpts2pp, FRUptspp, GALTptspp, GAMptspp, GLCptspp, MALTptspp, MANGLYCptspp, MANptspp, MNLptspp, SBTPD, SBTptspp, SUCptspp, TREptspp
9097	-49.5361	EX_succ_e	10.8056	-10	0.0694611	4	30.0575	-13.0428	25.8624	-3.81046	8.00562	b3417, b2415, b3732, b0336	2DGLCptspp, ACGAptspp, ACMANAptspp, ACMUMptspp, ARBTptspp, ASCBptspp, ATPS4rpp, CELBpts, CHTBSptspp, CSNt2pp, DHAPT, FRUpts2pp, FRUptspp, GALTptspp, GAMptspp, GLCptspp, MALTptspp, MANGLYCptspp, MANptspp, MLTP1, MLTP2, MLTP3, MNLptspp, SBTptspp, SUCptspp, TREptspp
9098	-49.5361	EX_succ_e	10.8056	-10	0.0694611	4	30.0575	-13.0428	25.8624	-3.81046	8.00562	b3417, b2415, b2918, b3732	2DGLCptspp, ACGAptspp, ACMANAptspp, ACMUMptspp, ARBTptspp, ASCBptspp, ATPS4rpp, CELBpts, CHTBSptspp, DHAPT, FRUpts2pp, FRUptspp, GALTptspp, GAMptspp, GLCptspp, MALTptspp, MANGLYCptspp, MANptspp, MLTP1, MLTP2, MLTP3, MNLptspp, SBTptspp, SUCptspp, TREptspp
9099	-49.5361	EX_succ_e	10.8056	-10	0.0694611	4	30.0575	-13.0428	25.8624	-3.81046	8.00562	b3417, b2415, b2538, b3736	2DGLCptspp, ACGAptspp, ACMANAptspp, ACMUMptspp, ARBTptspp, ASCBptspp, ATPS4rpp, CELBpts, CHTBSptspp, CINNDO, DHAPT, FRUpts2pp, FRUptspp, GALTptspp, GAMptspp, GLCptspp, MALTptspp, MANGLYCptspp, MANptspp, MLTP1, MLTP2, MLTP3, MNLptspp, PPPNDO, SBTptspp, SUCptspp, TREptspp
9100	-49.5361	EX_succ_e	10.8056	-10	0.0694611	4	30.0575	-13.0428	25.8624	-3.81046	8.00562	b2415, b4055, b3738, b4242	2DGLCptspp, ACGAptspp, ACMANAptspp, ACMUMptspp, ARBTptspp, ASCBptspp, ATPS4rpp, CELBpts, CHTBSptspp, DHAPT, FRUpts2pp, FRUptspp, GALTptspp, GAMptspp, GLCptspp, MALTptspp, MANGLYCptspp, MANptspp, MG2uabcpp, MNLptspp, SBTptspp, SUCptspp, TREptspp, TYRPpp
9101	-49.5361	EX_succ_e	10.8056	-10	0.0694611	4	30.0575	-13.0428	25.8624	-3.81046	8.00562	b0678, b2415, b0677, b3736	2DGLCptspp, ACGAptspp, ACMANAptspp, ACMUMptspp, AGDC, ARBTptspp, ASCBptspp, ATPS4rpp, CELBpts, CHTBSptspp, DHAPT, FRUpts2pp, FRUptspp, G6PDA, GALTptspp, GAMptspp, GLCptspp, MALTptspp, MANGLYCptspp, MANptspp, MNLptspp, SBTptspp, SUCptspp, TREptspp
9102	-49.5361	EX_succ_e	10.8056	-10	0.0694611	4	30.0575	-13.0428	25.8624	-3.81046	8.00562	b2415, b0596, b3732, b1599	2DGLCptspp, ACGAptspp, ACMANAptspp, ACMUMptspp, ARBTptspp, ASCBptspp, ATPS4rpp, CELBpts, CHTBSptspp, DHAPT, DHBD, FRUpts2pp, FRUptspp, GALTptspp, GAMptspp, GLCptspp, MALTptspp, MANGLYCptspp, MANptspp, MNLptspp, SBTptspp, SPMDt3pp, SUCptspp, TREptspp
9103	-49.5361	EX_succ_e	10.8056	-10	0.0694611	4	30.0575	-13.0428	25.8624	-3.81046	8.00562	b2415, b3565, b3732, b3572	2DGLCptspp, ACGAptspp, ACMANAptspp, ACMUMptspp, ARBTptspp, ASCBptspp, ATPS4rpp, CELBpts, CHTBSptspp, DHAPT, FRUpts2pp, FRUptspp, GALTptspp, GAMptspp, GLCptspp, MALTptspp, MANGLYCptspp, MANptspp, MNLptspp, SBTptspp, SUCptspp, TREptspp, VPAMTr, XYLI1, XYLI2
9104	-49.5361	EX_succ_e	10.8056	-10	0.0694611	4	30.0575	-13.0428	25.8624	-3.81046	8.00562	b2415, b1917, b3732, b1285	2DGLCptspp, ACGAptspp, ACMANAptspp, ACMUMptspp, ARBTptspp, ASCBptspp, ATPS4rpp, CELBpts, CHTBSptspp, CYSabcpp, DHAPT, FRUpts2pp, FRUptspp, GALTptspp, GAMptspp, GLCptspp, LDGUNPD, MALTptspp, MANGLYCptspp, MANptspp, MNLptspp, SBTptspp, SUCptspp, TREptspp
9105	-49.5361	EX_succ_e	10.8056	-10	0.0694611	4	30.0575	-13.0428	25.8624	-3.81046	8.00562	b3416, b2415, b3737, b0728	2DGLCptspp, ACGAptspp, ACMANAptspp, ACMUMptspp, AMALT1, AMALT2, AMALT3, AMALT4, ARBTptspp, ASCBptspp, ATPS4rpp, CELBpts, CHTBSptspp, DHAPT, FRUpts2pp, FRUptspp, GALTptspp, GAMptspp, GLCptspp, MALTptspp, MANGLYCptspp, MANptspp, MNLptspp, SBTptspp, SUCOAS, SUCptspp, TREptspp
9106	-49.5361	EX_succ_e	10.8056	-10	0.0694611	4	30.0575	-13.0428	25.8624	-3.81046	8.00562	b4025, b2415, b3736, b3625	2DGLCptspp, ACGAptspp, ACMANAptspp, ACMUMptspp, ARBTptspp, ASCBptspp, ATPS4rpp, CELBpts, CHTBSptspp, DHAPT, FRUpts2pp, FRUptspp, GALTptspp, GAMptspp, GLCptspp, HEPK2, MALTptspp, MANGLYCptspp, MANptspp, MNLptspp, PGI, SBTptspp, SUCptspp, TREptspp
9107	-49.5361	EX_succ_e	10.8056	-10	0.0694611	4	30.0575	-13.0428	25.8624	-3.81046	8.00562	b3124, b2415, b3738, b3894	2DGLCptspp, ACGAptspp, ACMANAptspp, ACMUMptspp, ARBTptspp, ASCBptspp, ATPS4rpp, CELBpts, CHTBSptspp, DHAPT, FRUpts2pp, FRUptspp, GALTptspp, GAMptspp, GLCptspp, GLYCK2, MALTptspp, MANGLYCptspp, MANptspp, MNLptspp, SBTptspp, SUCptspp, TREptspp
9108	-49.5361	EX_succ_e	10.8056	-10	0.0694611	4	30.0575	-13.0428	25.8624	-3.81046	8.00562	b2415, b2210, b3736, b0307	2DGLCptspp, ACGAptspp, ACMANAptspp, ACMUMptspp, ARBTptspp, ASCBptspp, ATPS4rpp, CELBpts, CHTBSptspp, DHAPT, FRUpts2pp, FRUptspp, GALTptspp, GAMptspp, GLCptspp, MALTptspp, MANGLYCptspp, MANptspp, MDH2, MDH3, MNLptspp, SBTptspp, SUCptspp, TREptspp
9109	-49.5361	EX_succ_e	10.8056	-10	0.0694611	4	30.0575	-13.0428	25.8624	-3.81046	8.00562	b2415, b2210, b3736, b0613	2DGLCptspp, ACGAptspp, ACMANAptspp, ACMUMptspp, ARBTptspp, ASCBptspp, ATPS4rpp, CELBpts, CHTBSptspp, DHAPT, FRUpts2pp, FRUptspp, GALTptspp, GAMptspp, GLCptspp, MALTptspp, MANGLYCptspp, MANptspp, MDH2, MDH3, MNLptspp, SBTptspp, SUCptspp, TPRDCOAS, TREptspp
9110	-49.5361	EX_succ_e	10.8056	-10	0.0694611	4	30.0575	-13.0428	25.8624	-3.81046	8.00562	b2415, b0061, b3736, b3035	2DGLCptspp, ACGAptspp, ACMANAptspp, ACMUMptspp, ARBTptspp, ASCBptspp, ATPS4rpp, CELBpts, CHTBSptspp, CMtpp, DHAPT, DOXRBCNtpp, FEENTERtex, FRUpts2pp, FRUptspp, FUSAtpp, GALTptspp, GAMptspp, GLCptspp, INDOLEt2pp, MALTptspp, MANGLYCptspp, MANptspp, MINCYCtpp, MNLptspp, NOVBCNtpp, RFAMPtpp, SBTptspp, SUCptspp, TREptspp, TTRCYCtpp
9111	-49.5361	EX_succ_e	10.8056	-10	0.0694611	4	30.0575	-13.0428	25.8624	-3.81046	8.00562	b2415, b3736, b4035, b3035	14GLUCANabcpp, 2DGLCptspp, ACGAptspp, ACMANAptspp, ACMUMptspp, ARBTptspp, ASCBptspp, ATPS4rpp, CELBpts, CHTBSptspp, CMtpp, DHAPT, DOXRBCNtpp, FEENTERtex, FRUpts2pp, FRUptspp, FUSAtpp, GALTptspp, GAMptspp, GLCptspp, INDOLEt2pp, MALTHXabcpp, MALTPTabcpp, MALTTRabcpp, MALTTTRabcpp, MALTabcpp, MALTptspp, MANGLYCptspp, MANptspp, MINCYCtpp, MNLptspp, NOVBCNtpp, RFAMPtpp, SBTptspp, SUCptspp, TREptspp, T…
9112	-49.5361	EX_succ_e	10.8056	-10	0.0694611	4	30.0575	-13.0428	25.8624	-3.81046	8.00562	b2415, b3732, b3035, b3882	2DGLCptspp, 3SLAR, ACGAptspp, ACMANAptspp, ACMUMptspp, ARBTptspp, ASCBptspp, ATPS4rpp, CELBpts, CHTBSptspp, CMtpp, DHAPT, DOXRBCNtpp, FEENTERtex, FRUpts2pp, FRUptspp, FUSAtpp, GALTptspp, GAMptspp, GHBDHx, GLCptspp, INDOLEt2pp, MALTptspp, MANGLYCptspp, MANptspp, MINCYCtpp, MNLptspp, NOVBCNtpp, RFAMPtpp, SBTptspp, SUCptspp, TREptspp, TTRCYCtpp
9113	-49.5361	EX_succ_e	10.8056	-10	0.0694611	4	30.0575	-13.0428	25.8624	-3.81046	8.00562	b2415, b3526, b3736, b3627	2DGLCptspp, ACGAptspp, ACMANAptspp, ACMUMptspp, ARBTptspp, ASCBptspp, ATPS4rpp, CELBpts, CHTBSptspp, DDGLK, DHAPT, FRUpts2pp, FRUptspp, GALTptspp, GAMptspp, GLCTR2, GLCptspp, MALTptspp, MANGLYCptspp, MANptspp, MNLptspp, SBTptspp, SUCptspp, TREptspp
9114	-49.5361	EX_succ_e	10.8056	-10	0.0694611	4	30.0575	-13.0428	25.8624	-3.81046	8.00562	b2415, b3736, b2133, b2200	2DGLCptspp, ACGAptspp, ACMANAptspp, ACMUMptspp, ARBTptspp, ASCBptspp, ATPS4rpp, CELBpts, CHTBSptspp, DHAPT, FRUpts2pp, FRUptspp, GALTptspp, GAMptspp, GLCptspp, LDH_D2, MALTptspp, MANGLYCptspp, MANptspp, MNLptspp, PHEMEabcpp, SBTptspp, SUCptspp, TREptspp
9115	-49.5361	EX_succ_e	10.8056	-10	0.0694611	4	30.0575	-13.0428	25.8624	-3.81046	8.00562	b4117, b2415, b2310, b3732	2DGLCptspp, ACGAptspp, ACMANAptspp, ACMUMptspp, ARBTptspp, ARGDC, ASCBptspp, ATPS4rpp, CELBpts, CHTBSptspp, DHAPT, FRUpts2pp, FRUptspp, GALTptspp, GAMptspp, GLCptspp, LYSabcpp, MALTptspp, MANGLYCptspp, MANptspp, MNLptspp, ORNabcpp, SBTptspp, SUCptspp, TREptspp
9116	-49.5361	EX_succ_e	10.8056	-10	0.0694611	4	30.0575	-13.0428	25.8624	-3.81046	8.00562	b2415, b3736, b2133, b3927	2DGLCptspp, ACGAptspp, ACMANAptspp, ACMUMptspp, ARBTptspp, ASCBptspp, ATPS4rpp, CELBpts, CHTBSptspp, DHAPT, FRUpts2pp, FRUptspp, GALTptspp, GAMptspp, GLCptspp, GLYALDtpp, GLYtpp, LDH_D2, MALTptspp, MANGLYCptspp, MANptspp, MNLptspp, SBTptspp, SUCptspp, TREptspp, UREAtpp
9117	-49.5361	EX_succ_e	10.8056	-10	0.0694611	4	30.0575	-13.0428	25.8624	-3.81046	8.00562	b3752, b2415, b3736, b1856	2DGLCptspp, ACGAptspp, ACMANAptspp, ACMUMptspp, ARBTptspp, ASCBptspp, ATPS4rpp, CELBpts, CHTBSptspp, DHAPT, FRUpts2pp, FRUptspp, GALTptspp, GAMptspp, GLCptspp, MALTptspp, MANGLYCptspp, MANptspp, MNLptspp, RBK, SBTptspp, SUCptspp, TREptspp
9118	-49.5361	EX_succ_e	10.8056	-10	0.0694611	4	30.0575	-13.0428	25.8624	-3.81046	8.00562	b3752, b2708, b2415, b3736	2DGLCptspp, ACGAptspp, ACMANAptspp, ACMUMptspp, ARBTptspp, ASCBptspp, ATPS4rpp, CELBpts, CHTBSptspp, DHAPT, FRUpts2pp, FRUptspp, GALTptspp, GAMptspp, GLCptspp, MALTptspp, MANGLYCptspp, MANptspp, MNLptspp, RBK, SBTptspp, SUCptspp, TREptspp
9119	-49.5361	EX_succ_e	10.8056	-10	0.0694611	4	30.0575	-13.0428	25.8624	-3.81046	8.00562	b3752, b2415, b2177, b3736	2DGLCptspp, ACGAptspp, ACMANAptspp, ACMUMptspp, ARBTptspp, ASCBptspp, ATPS4rpp, CELBpts, CHTBSptspp, DHAPT, FRUpts2pp, FRUptspp, GALTptspp, GAMptspp, GLCptspp, MALTptspp, MANGLYCptspp, MANptspp, MNLptspp, RBK, SBTptspp, SUCptspp, TREptspp
9120	-49.5361	EX_succ_e	10.8056	-10	0.0694611	4	30.0575	-13.0428	25.8624	-3.81046	8.00562	b3752, b2415, b1245, b3738	2DGLCptspp, ACGAptspp, ACMANAptspp, ACMUMptspp, ARBTptspp, ASCBptspp, ATPS4rpp, CELBpts, CHTBSptspp, DHAPT, FRUpts2pp, FRUptspp, GALTptspp, GAMptspp, GLCptspp, MALTptspp, MANGLYCptspp, MANptspp, MNLptspp, RBK, SBTptspp, SUCptspp, TREptspp
9121	-49.5361	EX_succ_e	10.8056	-10	0.0694611	4	30.0575	-13.0428	25.8624	-3.81046	8.00562	b3752, b2415, b1386, b3736	2DGLCptspp, 42A12BOOXpp, ACGAptspp, ACMANAptspp, ACMUMptspp, ARBTptspp, ASCBptspp, ATPS4rpp, CELBpts, CHTBSptspp, DHAPT, FRUpts2pp, FRUptspp, GALTptspp, GAMptspp, GLCptspp, MALTptspp, MANGLYCptspp, MANptspp, MNLptspp, PEAMNOpp, RBK, SBTptspp, SUCptspp, TREptspp, TYROXDApp
9122	-49.5361	EX_succ_e	10.8056	-10	0.0694611	4	30.0575	-13.0428	25.8624	-3.81046	8.00562	b2415, b1768, b1101, b3738	2DGLCptspp, ACGAptspp, ACMANAptspp, ACMUMptspp, ARBTptspp, ASCBptspp, ATPS4rpp, CELBpts, CHTBSptspp, DHAPT, FRUpts2pp, FRUptspp, GALTptspp, GAMptspp, GLCptspp, MALTptspp, MANGLYCptspp, MANptspp, MNLptspp, NNAM, SBTptspp, SUCptspp, TREptspp
9123	-49.5361	EX_succ_e	10.8056	-10	0.0694611	4	30.0575	-13.0428	25.8624	-3.81046	8.00562	b2708, b2415, b1768, b3736	2DGLCptspp, ACGAptspp, ACMANAptspp, ACMUMptspp, ARBTptspp, ASCBptspp, ATPS4rpp, CELBpts, CHTBSptspp, DHAPT, FRUpts2pp, FRUptspp, GALTptspp, GAMptspp, GLCptspp, MALTptspp, MANGLYCptspp, MANptspp, MNLptspp, NNAM, SBTptspp, SUCptspp, TREptspp
9124	-49.5361	EX_succ_e	10.8056	-10	0.0694611	4	30.0575	-13.0428	25.8624	-3.81046	8.00562	b2415, b3736, b0931, b1126	2DGLCptspp, ACGAptspp, ACMANAptspp, ACMUMptspp, ARBTptspp, ASCBptspp, ATPS4rpp, CELBpts, CHTBSptspp, DHAPT, FRUpts2pp, FRUptspp, GALTptspp, GAMptspp, GLCptspp, MALTptspp, MANGLYCptspp, MANptspp, MNLptspp, NAMNPP, SBTptspp, SUCptspp, TREptspp
9125	-49.5361	EX_succ_e	10.8056	-10	0.0694611	4	30.0575	-13.0428	25.8624	-3.81046	8.00562	b0446, b2415, b1768, b3736	2DGLCptspp, ACGAptspp, ACMANAptspp, ACMUMptspp, ARBTptspp, ASCBptspp, ATPS4rpp, CELBpts, CHTBSptspp, DHAPT, FRUpts2pp, FRUptspp, GALTptspp, GAMptspp, GLCptspp, MALTptspp, MANGLYCptspp, MANptspp, MNLptspp, NNAM, SBTptspp, SUCptspp, TREptspp
9126	-49.5361	EX_succ_e	10.8056	-10	0.0694611	4	30.0575	-13.0428	25.8624	-3.81046	8.00562	b2415, b3736, b0931, b3503	2DGLCptspp, ACGAptspp, ACMANAptspp, ACMUMptspp, ARBTptspp, ASCBptspp, ASR, ATPS4rpp, CELBpts, CHTBSptspp, DHAPT, FRUpts2pp, FRUptspp, GALTptspp, GAMptspp, GLCptspp, MALTptspp, MANGLYCptspp, MANptspp, MNLptspp, NAMNPP, SBTptspp, SUCptspp, TREptspp
9127	-49.5361	EX_succ_e	10.8056	-10	0.0694611	4	30.0575	-13.0428	25.8624	-3.81046	8.00562	b2415, b1768, b2180, b3738	2DGLCptspp, ACGAptspp, ACMANAptspp, ACMUMptspp, ARBTptspp, ASCBptspp, ATPS4rpp, CELBpts, CHTBSptspp, DHAPT, FRUpts2pp, FRUptspp, GALTptspp, GAMptspp, GLCptspp, MALTptspp, MANGLYCptspp, MANptspp, MNLptspp, NNAM, SBTptspp, SUCptspp, TREptspp
9128	-49.5361	EX_succ_e	10.8056	-10	0.0694611	4	30.0575	-13.0428	25.8624	-3.81046	8.00562	b2415, b0588, b3736, b1813	2DGLCptspp, ACGAptspp, ACMANAptspp, ACMUMptspp, ARBTptspp, ASCBptspp, ATPS4rpp, CELBpts, CHTBSptspp, DHAPT, DHBSZ3FEabcpp, FEENTERabcpp, FRUpts2pp, FRUptspp, GALTptspp, GAMptspp, GLCptspp, HPYRP, MALTptspp, MANGLYCptspp, MANptspp, MNLptspp, SBTptspp, SUCptspp, TREptspp
9129	-49.5361	EX_succ_e	10.8056	-10	0.0694611	4	30.0575	-13.0428	25.8624	-3.81046	8.00562	b2415, b1814, b3915, b3736	2DGLCptspp, ACGAptspp, ACMANAptspp, ACMUMptspp, ARBTptspp, ASCBptspp, ATPS4rpp, CELBpts, CHTBSptspp, DHAPT, FE2t3pp, FRUpts2pp, FRUptspp, GALTptspp, GAMptspp, GLCptspp, HG2t3pp, MALTptspp, MANGLYCptspp, MANptspp, MNLptspp, SBTptspp, SUCptspp, TREptspp
9130	-49.5361	EX_succ_e	10.8056	-10	0.0694611	4	30.0575	-13.0428	25.8624	-3.81046	8.00562	b4196, b2415, b3915, b3736	2DGLCptspp, ACGAptspp, ACMANAptspp, ACMUMptspp, ARBTptspp, ASCBptspp, ATPS4rpp, CELBpts, CHTBSptspp, DHAPT, FE2t3pp, FRUpts2pp, FRUptspp, GALTptspp, GAMptspp, GLCptspp, HG2t3pp, MALTptspp, MANGLYCptspp, MANptspp, MNLptspp, SBTptspp, SUCptspp, TREptspp
9131	-49.5361	EX_succ_e	10.8056	-10	0.0694611	4	30.0575	-13.0428	25.8624	-3.81046	8.00562	b2415, b3456, b3732, b3572	2DGLCptspp, ACGAptspp, ACMANAptspp, ACMUMptspp, ALAabcpp, ARBTptspp, ASCBptspp, ATPS4rpp, CELBpts, CHTBSptspp, DHAPT, FRUpts2pp, FRUptspp, GALTptspp, GAMptspp, GLCptspp, ILEabcpp, LEUabcpp, MALTptspp, MANGLYCptspp, MANptspp, MNLptspp, SBTptspp, SUCptspp, THRabcpp, TREptspp, VALabcpp, VPAMTr
9132	-49.5361	EX_succ_e	10.8056	-10	0.0694611	4	30.0575	-13.0428	25.8624	-3.81046	8.00562	b1019, b2415, b3732, b1813	2DGLCptspp, ACGAptspp, ACMANAptspp, ACMUMptspp, ARBTptspp, ASCBptspp, ATPS4rpp, CELBpts, CHTBSptspp, DHAPT, FRUpts2pp, FRUptspp, GALTptspp, GAMptspp, GLCptspp, HPYRP, MALTptspp, MANGLYCptspp, MANptspp, MNLptspp, SBTptspp, SUCptspp, TREptspp
9133	-49.5361	EX_succ_e	10.8056	-10	0.0694611	4	30.0575	-13.0428	25.8624	-3.81046	8.00562	b2415, b3946, b3732, b1813	2DGLCptspp, ACGAptspp, ACMANAptspp, ACMUMptspp, ARBTptspp, ASCBptspp, ATPS4rpp, CELBpts, CHTBSptspp, DHAPT, FRUpts2pp, FRUptspp, GALTptspp, GAMptspp, GLCptspp, HPYRP, MALTptspp, MANGLYCptspp, MANptspp, MNLptspp, SBTptspp, SUCptspp, TREptspp
9134	-49.5361	EX_succ_e	10.8056	-10	0.0694611	4	30.0575	-13.0428	25.8624	-3.81046	8.00562	b1238, b2415, b3738, b1392	2DGLCptspp, ACGAptspp, ACMANAptspp, ACMUMptspp, ARBTptspp, ASCBptspp, ATPS4rpp, CELBpts, CHTBSptspp, DHAPT, DURIK1, FRUpts2pp, FRUptspp, GALTptspp, GAMptspp, GLCptspp, MALTptspp, MANGLYCptspp, MANptspp, MNLptspp, PACCOAE, SBTptspp, SUCptspp, TMDK1, TREptspp
9135	-49.5361	EX_succ_e	10.8056	-10	0.0694611	4	30.0575	-13.0428	25.8624	-3.81046	8.00562	b2415, b3736, b1485, b1285	2DGLCptspp, ACGAptspp, ACMANAptspp, ACMUMptspp, ARBTptspp, ASCBptspp, ATPS4rpp, CELBpts, CHTBSptspp, DHAPT, FRUpts2pp, FRUptspp, GALTptspp, GAMptspp, GLCptspp, LDGUNPD, MALTptspp, MANGLYCptspp, MANptspp, MNLptspp, SBTptspp, SUCptspp, TREptspp
9136	-49.5361	EX_succ_e	10.8056	-10	0.0694611	4	30.0575	-13.0428	25.8624	-3.81046	8.00562	b2415, b3736, b4268, b1285	2DGLCptspp, ACGAptspp, ACMANAptspp, ACMUMptspp, ARBTptspp, ASCBptspp, ATPS4rpp, CELBpts, CHTBSptspp, DHAPT, FRUpts2pp, FRUptspp, GALTptspp, GAMptspp, GLCptspp, LDGUNPD, MALTptspp, MANGLYCptspp, MANptspp, MNLptspp, SBTptspp, SUCptspp, TREptspp
9137	-49.5361	EX_succ_e	10.8056	-10	0.0694611	4	30.0575	-13.0428	25.8624	-3.81046	8.00562	b2415, b3736, b1298, b2893	2DGLCptspp, ACGAptspp, ACMANAptspp, ACMUMptspp, ARBTptspp, ASCBptspp, ATPS4rpp, CELBpts, CHTBSptspp, DHAPT, DSBCGT, FRUpts2pp, FRUptspp, GALTptspp, GAMptspp, GGGABAH, GLCptspp, MALTptspp, MANGLYCptspp, MANptspp, MNLptspp, SBTptspp, SUCptspp, TDSR1, TREptspp
9138	-49.5361	EX_succ_e	10.8056	-10	0.0694611	4	30.0575	-13.0428	25.8624	-3.81046	8.00562	b2415, b3736, b1300, b2093	2DGLCptspp, 3HPADHi, ACGAptspp, ACMANAptspp, ACMUMptspp, ARBTptspp, ASCBptspp, ATPS4rpp, CELBpts, CHTBSptspp, DHAPT, FRUpts2pp, FRUptspp, GALTptspp, GAMptspp, GGGABADr, GLCptspp, MALTptspp, MANGLYCptspp, MANptspp, MNLptspp, SBTptspp, SUCptspp, TREptspp
9139	-49.5361	EX_succ_e	10.8056	-10	0.0694611	4	30.0575	-13.0428	25.8624	-3.81046	8.00562	b2415, b3517, b3732, b1298	2DGLCptspp, ACGAptspp, ACMANAptspp, ACMUMptspp, ARBTptspp, ASCBptspp, ATPS4rpp, CELBpts, CHTBSptspp, DHAPT, FRUpts2pp, FRUptspp, GALTptspp, GAMptspp, GGGABAH, GLCptspp, MALTptspp, MANGLYCptspp, MANptspp, MNLptspp, SBTptspp, SUCptspp, TREptspp
9140	-49.5361	EX_succ_e	10.8056	-10	0.0694611	4	30.0575	-13.0428	25.8624	-3.81046	8.00562	b1238, b2415, b3738, b2994	2DGLCptspp, ACGAptspp, ACMANAptspp, ACMUMptspp, ARBTptspp, ASCBptspp, ATPS4rpp, CELBpts, CHTBSptspp, DHAPT, DURIK1, FRUpts2pp, FRUptspp, GALTptspp, GAMptspp, GLCptspp, MALTptspp, MANGLYCptspp, MANptspp, MNLptspp, SBTptspp, SUCptspp, TMDK1, TREptspp
9141	-49.5361	EX_succ_e	10.8056	-10	0.0694611	4	30.0575	-13.0428	25.8624	-3.81046	8.00562	b1238, b2415, b4260, b3736	2DGLCptspp, ACGAptspp, ACMANAptspp, ACMUMptspp, ARBTptspp, ASCBptspp, ATPS4rpp, CELBpts, CHTBSptspp, DHAPT, DURIK1, FRUpts2pp, FRUptspp, GALTptspp, GAMptspp, GLCptspp, MALTptspp, MANGLYCptspp, MANptspp, MNLptspp, SBTptspp, SUCptspp, TMDK1, TREptspp
9142	-49.5361	EX_succ_e	10.8056	-10	0.0694611	4	30.0575	-13.0428	25.8624	-3.81046	8.00562	b1612, b2415, b3738, b0832	2DGLCptspp, ACGAptspp, ACMANAptspp, ACMUMptspp, ARBTptspp, ASCBptspp, ATPS4rpp, CELBpts, CHTBSptspp, DHAPT, FRUpts2pp, FRUptspp, GALTptspp, GAMptspp, GLCptspp, GTHRDabcpp, MALTptspp, MANGLYCptspp, MANptspp, MNLptspp, SBTptspp, SUCptspp, TREptspp
9143	-49.5361	EX_succ_e	10.8056	-10	0.0694611	4	30.0575	-13.0428	25.8624	-3.81046	8.00562	b2415, b1465, b3732, b0832	2DGLCptspp, ACGAptspp, ACMANAptspp, ACMUMptspp, ARBTptspp, ASCBptspp, ATPS4rpp, CELBpts, CHTBSptspp, DHAPT, FRUpts2pp, FRUptspp, GALTptspp, GAMptspp, GLCptspp, GTHRDabcpp, MALTptspp, MANGLYCptspp, MANptspp, MNLptspp, SBTptspp, SUCptspp, TREptspp
9144	-49.5361	EX_succ_e	10.8056	-10	0.0694611	4	30.0575	-13.0428	25.8624	-3.81046	8.00562	b3713, b2415, b3732, b0832	2DGLCptspp, ACGAptspp, ACMANAptspp, ACMUMptspp, ARBTptspp, ASCBptspp, ATPS4rpp, CELBpts, CHTBSptspp, DHAPT, FRUpts2pp, FRUptspp, GALTptspp, GAMptspp, GLCptspp, GTHRDabcpp, MALTptspp, MANGLYCptspp, MANptspp, MNLptspp, SBTptspp, SUCptspp, TREptspp
9145	-49.5361	EX_succ_e	10.8056	-10	0.0694611	4	30.0575	-13.0428	25.8624	-3.81046	8.00562	b2415, b3738, b0308, b0829	2DGLCptspp, ACGAptspp, ACMANAptspp, ACMUMptspp, ARBTptspp, ASCBptspp, ATPS4rpp, CELBpts, CHTBSptspp, DHAPT, FRUpts2pp, FRUptspp, GALTptspp, GAMptspp, GLCptspp, GTHRDabcpp, MALTptspp, MANGLYCptspp, MANptspp, MNLptspp, SBTptspp, SUCptspp, TREptspp
9146	-49.5361	EX_succ_e	10.8056	-10	0.0694611	4	30.0575	-13.0428	25.8624	-3.81046	8.00562	b2415, b4240, b3732, b0829	2DGLCptspp, ACGAptspp, ACMANAptspp, ACMUMptspp, ARBTptspp, ASCBptspp, ATPS4rpp, CELBpts, CHTBSptspp, DHAPT, FRUpts2pp, FRUptspp, GALTptspp, GAMptspp, GLCptspp, GTHRDabcpp, MALTptspp, MANGLYCptspp, MANptspp, MNLptspp, SBTptspp, SUCptspp, TREptspp
9147	-49.5361	EX_succ_e	10.8056	-10	0.0694611	4	30.0575	-13.0428	25.8624	-3.81046	8.00562	b2415, b3736, b0336, b0832	2DGLCptspp, ACGAptspp, ACMANAptspp, ACMUMptspp, ARBTptspp, ASCBptspp, ATPS4rpp, CELBpts, CHTBSptspp, CSNt2pp, DHAPT, FRUpts2pp, FRUptspp, GALTptspp, GAMptspp, GLCptspp, GTHRDabcpp, MALTptspp, MANGLYCptspp, MANptspp, MNLptspp, SBTptspp, SUCptspp, TREptspp
9148	-49.5361	EX_succ_e	10.8056	-10	0.0694611	4	30.0575	-13.0428	25.8624	-3.81046	8.00562	b2415, b1468, b3732, b0829	2DGLCptspp, ACGAptspp, ACMANAptspp, ACMUMptspp, ARBTptspp, ASCBptspp, ATPS4rpp, CELBpts, CHTBSptspp, DHAPT, FRUpts2pp, FRUptspp, GALTptspp, GAMptspp, GLCptspp, GTHRDabcpp, MALTptspp, MANGLYCptspp, MANptspp, MNLptspp, SBTptspp, SUCptspp, TREptspp
9149	-49.5361	EX_succ_e	10.8056	-10	0.0694611	4	30.0575	-13.0428	25.8624	-3.81046	8.00562	b2415, b3732, b3032, b0831	2DGLCptspp, ACGAptspp, ACMANAptspp, ACMUMptspp, ARBTptspp, ASCBptspp, ATPS4rpp, CELBpts, CHTBSptspp, DHAPT, FRUpts2pp, FRUptspp, GALTptspp, GAMptspp, GLCptspp, GTHRDabcpp, MALTptspp, MANGLYCptspp, MANptspp, MNLptspp, SBTptspp, SUCptspp, TREptspp
9150	-49.5361	EX_succ_e	10.8056	-10	0.0694611	4	30.0575	-13.0428	25.8624	-3.81046	8.00562	b2415, b2802, b3736, b2262	2DGLCptspp, ACGAptspp, ACMANAptspp, ACMUMptspp, ARABDI, ARBTptspp, ASCBptspp, ATPS4rpp, CELBpts, CHTBSptspp, DHAPT, DHNCOAS, FCI, FRUpts2pp, FRUptspp, GALTptspp, GAMptspp, GLCptspp, MALTptspp, MANGLYCptspp, MANptspp, MNLptspp, SBTptspp, SUCptspp, TREptspp
9151	-49.5361	EX_succ_e	10.8056	-10	0.0694611	4	30.0575	-13.0428	25.8624	-3.81046	8.00562	b3794, b2415, b3732, b1900	2DGLCptspp, ACGAptspp, ACMAMUT, ACMANAptspp, ACMUMptspp, ARBTptspp, ARBabcpp, ASCBptspp, ATPS4rpp, CELBpts, CHTBSptspp, DHAPT, FRUpts2pp, FRUptspp, GALTptspp, GAMptspp, GLCptspp, MALTptspp, MANGLYCptspp, MANptspp, MNLptspp, SBTptspp, SUCptspp, TREptspp
9152	-49.5361	EX_succ_e	10.8056	-10	0.0694611	4	30.0575	-13.0428	25.8624	-3.81046	8.00562	b2415, b3826, b3738, b1488	2DGLCptspp, ACGAptspp, ACMANAptspp, ACMUMptspp, ALAALAD, ARBTptspp, ASCBptspp, ATPS4rpp, CELBpts, CHTBSptspp, DHAPT, FRUpts2pp, FRUptspp, GALTptspp, GAMptspp, GLCptspp, MALTptspp, MANGLYCptspp, MANptspp, MNLptspp, SBTptspp, SUCptspp, TREptspp
9153	-49.5361	EX_succ_e	10.8056	-10	0.0694611	4	30.0575	-13.0428	25.8624	-3.81046	8.00562	b2415, b3738, b4035, b1488	14GLUCANabcpp, 2DGLCptspp, ACGAptspp, ACMANAptspp, ACMUMptspp, ALAALAD, ARBTptspp, ASCBptspp, ATPS4rpp, CELBpts, CHTBSptspp, DHAPT, FRUpts2pp, FRUptspp, GALTptspp, GAMptspp, GLCptspp, MALTHXabcpp, MALTPTabcpp, MALTTRabcpp, MALTTTRabcpp, MALTabcpp, MALTptspp, MANGLYCptspp, MANptspp, MNLptspp, SBTptspp, SUCptspp, TREptspp
9154	-49.5361	EX_succ_e	10.8056	-10	0.0694611	4	30.0575	-13.0428	25.8624	-3.81046	8.00562	b2415, b0485, b3736, b1488	2DGLCptspp, ACGAptspp, ACMANAptspp, ACMUMptspp, ALAALAD, ARBTptspp, ASCBptspp, ATPS4rpp, CELBpts, CHTBSptspp, DHAPT, FRUpts2pp, FRUptspp, GALTptspp, GAMptspp, GLCptspp, MALTptspp, MANGLYCptspp, MANptspp, MNLptspp, SBTptspp, SUCptspp, TREptspp
9155	-49.5361	EX_succ_e	10.8056	-10	0.0694611	4	30.0575	-13.0428	25.8624	-3.81046	8.00562	b2415, b3738, b1113, b0606	2DGLCptspp, ACGAptspp, ACMANAptspp, ACMUMptspp, ARBTptspp, ASCBptspp, ATPS4rpp, CELBpts, CHTBSptspp, DHAPT, FRUpts2pp, FRUptspp, GALTptspp, GAMptspp, GLCptspp, MALTptspp, MANGLYCptspp, MANptspp, MNLptspp, NADHPO, SBTptspp, SUCptspp, TREptspp
9156	-49.5361	EX_succ_e	10.8056	-10	0.0694611	4	30.0575	-13.0428	25.8624	-3.81046	8.00562	b2415, b3732, b0606, b1476	2DGLCptspp, ACGAptspp, ACMANAptspp, ACMUMptspp, ARBTptspp, ASCBptspp, ATPS4rpp, CELBpts, CHTBSptspp, DHAPT, FRUpts2pp, FRUptspp, GALTptspp, GAMptspp, GLCptspp, MALTptspp, MANGLYCptspp, MANptspp, MNLptspp, NADHPO, SBTptspp, SUCptspp, TREptspp
9157	-49.5361	EX_succ_e	10.8056	-10	0.0694611	4	30.0575	-13.0428	25.8624	-3.81046	8.00562	b2415, b3732, b3751, b0606	2DGLCptspp, ACGAptspp, ACMANAptspp, ACMUMptspp, ARBTptspp, ASCBptspp, ATPS4rpp, CELBpts, CHTBSptspp, DHAPT, FRUpts2pp, FRUptspp, GALTptspp, GAMptspp, GLCptspp, MALTptspp, MANGLYCptspp, MANptspp, MNLptspp, NADHPO, SBTptspp, SUCptspp, TREptspp
9158	-49.5361	EX_succ_e	10.8056	-10	0.0694611	4	30.0575	-13.0428	25.8624	-3.81046	8.00562	b2038, b2415, b3738, b0968	2DGLCptspp, ACGAptspp, ACMANAptspp, ACMUMptspp, APH120, APH140, APH141, APH160, APH161, APH180, APH181, ARBTptspp, ASCBptspp, ATPS4rpp, CELBpts, CHTBSptspp, DHAPT, FRUpts2pp, FRUptspp, GALTptspp, GAMptspp, GLCptspp, MALTptspp, MANGLYCptspp, MANptspp, MNLptspp, SBTptspp, SUCptspp, TDPDRE, TREptspp
9159	-49.5361	EX_succ_e	10.8056	-10	0.0694611	4	30.0575	-13.0428	25.8624	-3.81046	8.00562	b2415, b3736, b3630, b2263	2DGLCptspp, ACGAptspp, ACMANAptspp, ACMUMptspp, ARBTptspp, ASCBptspp, ATPS4rpp, CELBpts, CHTBSptspp, DHAPT, FRUpts2pp, FRUptspp, GALTptspp, GAMptspp, GLCptspp, HEPK1, MALTptspp, MANGLYCptspp, MANptspp, MNLptspp, SBTptspp, SHCHCS3, SUCptspp, TREptspp
9160	-49.5361	EX_succ_e	10.8056	-10	0.0694611	4	30.0575	-13.0428	25.8624	-3.81046	8.00562	b2415, b1584, b2310, b3732	2DGLCptspp, ACGAptspp, ACMANAptspp, ACMUMptspp, ARBTptspp, ASCBptspp, ATPS4rpp, CELBpts, CHTBSptspp, DHAPT, FRUpts2pp, FRUptspp, GALTptspp, GAMptspp, GLCptspp, LYSabcpp, MALTptspp, MANGLYCptspp, MANptspp, MNLptspp, ORNabcpp, SBTptspp, SPMDAT1, SPMDAT2, SUCptspp, TREptspp
9161	-49.5361	EX_succ_e	10.8056	-10	0.0694611	4	30.0575	-13.0428	25.8624	-3.81046	8.00562	b2415, b2587, b3732, b4088	2DGLCptspp, ACGAptspp, ACMANAptspp, ACMUMptspp, AKGt2rpp, ALLabcpp, ARBTptspp, ASCBptspp, ATPS4rpp, CELBpts, CHTBSptspp, DHAPT, FRUpts2pp, FRUptspp, GALTptspp, GAMptspp, GLCptspp, MALTptspp, MANGLYCptspp, MANptspp, MNLptspp, SBTptspp, SUCptspp, TREptspp
9162	-49.5361	EX_succ_e	10.8056	-10	0.0694611	4	30.0575	-13.0428	25.8624	-3.81046	8.00562	b2415, b2587, b2719, b3736	2DGLCptspp, ACGAptspp, ACMANAptspp, ACMUMptspp, AKGt2rpp, ARBTptspp, ASCBptspp, ATPS4rpp, CELBpts, CHTBSptspp, DHAPT, FRUpts2pp, FRUptspp, GALTptspp, GAMptspp, GLCptspp, MALTptspp, MANGLYCptspp, MANptspp, MNLptspp, SBTptspp, SUCptspp, TREptspp
9163	-49.5361	EX_succ_e	10.8056	-10	0.0694611	4	30.0575	-13.0428	25.8624	-3.81046	8.00562	b2415, b2904, b3732, b0037	2DGLCptspp, ACGAptspp, ACMANAptspp, ACMUMptspp, ARBTptspp, ASCBptspp, ATPS4rpp, CELBpts, CHTBSptspp, CRNCAL2, CRNDCAL2, CTBTCAL2, DHAPT, FRUpts2pp, FRUptspp, GALTptspp, GAMptspp, GLCptspp, GLYCL, MALTptspp, MANGLYCptspp, MANptspp, MNLptspp, SBTptspp, SUCptspp, TREptspp
9164	-49.5361	EX_succ_e	10.8056	-10	0.0694611	4	30.0575	-13.0428	25.8624	-3.81046	8.00562	b2415, b2393, b3736, b3654	2DGLCptspp, ACGAptspp, ACMANAptspp, ACMUMptspp, ARBTptspp, ASCBptspp, ATPS4rpp, CELBpts, CHTBSptspp, DHAPT, FRUpts2pp, FRUptspp, GALTptspp, GAMptspp, GLCptspp, GUAt2pp, MALTptspp, MANGLYCptspp, MANptspp, MNLptspp, SBTptspp, SUCptspp, TREptspp
9165	-49.5361	EX_succ_e	10.8056	-10	0.0694611	4	30.0575	-13.0428	25.8624	-3.81046	8.00562	b2415, b3738, b3654, b1006	2DGLCptspp, ACGAptspp, ACMANAptspp, ACMUMptspp, ARBTptspp, ASCBptspp, ATPS4rpp, CELBpts, CHTBSptspp, DHAPT, FRUpts2pp, FRUptspp, GALTptspp, GAMptspp, GLCptspp, GUAt2pp, MALTptspp, MANGLYCptspp, MANptspp, MNLptspp, SBTptspp, SUCptspp, TREptspp
9166	-49.5361	EX_succ_e	10.8056	-10	0.0694611	4	30.0575	-13.0428	25.8624	-3.81046	8.00562	b2415, b3736, b4088, b0007	2DGLCptspp, ACGAptspp, ACMANAptspp, ACMUMptspp, ALAt4pp, ALLabcpp, ARBTptspp, ASCBptspp, ATPS4rpp, CELBpts, CHTBSptspp, DHAPT, FRUpts2pp, FRUptspp, GALTptspp, GAMptspp, GLCptspp, GLYt4pp, MALTptspp, MANGLYCptspp, MANptspp, MNLptspp, SBTptspp, SUCptspp, TREptspp
9167	-49.5361	EX_succ_e	10.8056	-10	0.0694611	4	30.0575	-13.0428	25.8624	-3.81046	8.00562	b2415, b3738, b2889, b0827	2DGLCptspp, ACGAptspp, ACMANAptspp, ACMUMptspp, ARBTptspp, ASCBptspp, ATPS4rpp, BMOCOS, BWCOS, CELBpts, CHTBSptspp, DHAPT, FRUpts2pp, FRUptspp, GALTptspp, GAMptspp, GLCptspp, IPDDI, MALTptspp, MANGLYCptspp, MANptspp, MNLptspp, MOCOS, SBTptspp, SUCptspp, TREptspp, WCOS
9168	-49.5361	EX_succ_e	10.8056	-10	0.0694611	4	30.0575	-13.0428	25.8624	-3.81046	8.00562	b2415, b3732, b2260, b0724	2DGLCptspp, ACGAptspp, ACMANAptspp, ACMUMptspp, ARBTptspp, ASCBptspp, ATPS4rpp, CELBpts, CHTBSptspp, DHAPT, FRUpts2pp, FRUptspp, GALTptspp, GAMptspp, GLCptspp, MALTptspp, MANGLYCptspp, MANptspp, MNLptspp, SBTptspp, SUCBZL, SUCDi, SUCptspp, TREptspp
9169	-49.5361	EX_succ_e	10.8056	-10	0.0694611	4	30.0575	-13.0428	25.8624	-3.81046	8.00562	b0120, b2415, b3736, b4020	2DGLCptspp, ACGAptspp, ACMANAptspp, ACMUMptspp, ADMDC, ARBTptspp, ASCBptspp, ATPS4rpp, CELBpts, CHTBSptspp, DHAPT, FRUpts2pp, FRUptspp, GALTptspp, GAMptspp, GLCptspp, MALTptspp, MANGLYCptspp, MANptspp, MNLptspp, PItpp, SBTptspp, SUCptspp, TREptspp
9170	-49.5361	EX_succ_e	10.8056	-10	0.0694611	4	30.0575	-13.0428	25.8624	-3.81046	8.00562	b4025, b2415, b3732, b3930	2DGLCptspp, ACGAptspp, ACMANAptspp, ACMUMptspp, ARBTptspp, ASCBptspp, ATPS4rpp, CELBpts, CHTBSptspp, DHAPT, DHNAOT4, FRUpts2pp, FRUptspp, GALTptspp, GAMptspp, GLCptspp, MALTptspp, MANGLYCptspp, MANptspp, MNLptspp, PGI, SBTptspp, SUCptspp, TREptspp
9171	-49.5361	EX_succ_e	10.8056	-10	0.0694611	4	30.0575	-13.0428	25.8624	-3.81046	8.00562	b2415, b3732, b1485, b0662	2DGLCptspp, ACGAptspp, ACMANAptspp, ACMUMptspp, ARBTptspp, ASCBptspp, ATPS4rpp, CELBpts, CHTBSptspp, DHAPT, FRUpts2pp, FRUptspp, GALTptspp, GAMptspp, GLCptspp, MALTptspp, MANGLYCptspp, MANptspp, MNLptspp, OMMBLHXy, SBTptspp, SUCptspp, TREptspp
9172	-49.5361	EX_succ_e	10.8056	-10	0.0694611	4	30.0575	-13.0428	25.8624	-3.81046	8.00562	b2415, b3736, b2914, b0662	2DGLCptspp, ACGAptspp, ACMANAptspp, ACMUMptspp, ARBTptspp, ASCBptspp, ATPS4rpp, CELBpts, CHTBSptspp, DHAPT, FRUpts2pp, FRUptspp, GALTptspp, GAMptspp, GLCptspp, MALTptspp, MANGLYCptspp, MANptspp, MNLptspp, OMMBLHXy, SBTptspp, SUCptspp, TREptspp
9173	-49.5361	EX_succ_e	10.8056	-10	0.0694611	4	30.0575	-13.0428	25.8624	-3.81046	8.00562	b2415, b1247, b3736, b0662	2DGLCptspp, ACGAptspp, ACMANAptspp, ACMUMptspp, ARBTptspp, ASCBptspp, ATPS4rpp, CELBpts, CHTBSptspp, DHAPT, FRUpts2pp, FRUptspp, GALTptspp, GAMptspp, GLCptspp, MALTptspp, MANGLYCptspp, MANptspp, MNLptspp, OMMBLHXy, SBTptspp, SUCptspp, TREptspp
9174	-49.5361	EX_succ_e	10.8056	-10	0.0694611	4	30.0575	-13.0428	25.8624	-3.81046	8.00562	b1109, b2415, b3732, b0662	2DGLCptspp, ACGAptspp, ACMANAptspp, ACMUMptspp, ARBTptspp, ASCBptspp, ATPS4rpp, CELBpts, CHTBSptspp, DHAPT, FRUpts2pp, FRUptspp, GALTptspp, GAMptspp, GLCptspp, MALTptspp, MANGLYCptspp, MANptspp, MNLptspp, OMMBLHXy, SBTptspp, SUCptspp, TREptspp
9175	-49.5361	EX_succ_e	10.8056	-10	0.0694611	4	30.0575	-13.0428	25.8624	-3.81046	8.00562	b2415, b4031, b3738, b0662	2DGLCptspp, ACGAptspp, ACMANAptspp, ACMUMptspp, ARBTptspp, ASCBptspp, ATPS4rpp, CELBpts, CHTBSptspp, DHAPT, FRUpts2pp, FRUptspp, GALTptspp, GAMptspp, GLCptspp, MALTptspp, MANGLYCptspp, MANptspp, MNLptspp, OMMBLHXy, SBTptspp, SUCptspp, TREptspp, XYLt2pp
9176	-49.5361	EX_succ_e	10.8056	-10	0.0694611	4	30.0575	-13.0428	25.8624	-3.81046	8.00562	b2415, b3736, b0698, b0606	2DGLCptspp, ACGAptspp, ACMANAptspp, ACMUMptspp, ARBTptspp, ASCBptspp, ATPS4rpp, CELBpts, CHTBSptspp, DHAPT, FRUpts2pp, FRUptspp, GALTptspp, GAMptspp, GLCptspp, Kabcpp, MALTptspp, MANGLYCptspp, MANptspp, MNLptspp, NADHPO, SBTptspp, SUCptspp, TREptspp
9177	-49.5361	EX_succ_e	10.8056	-10	0.0694611	4	30.0575	-13.0428	25.8624	-3.81046	8.00562	b2415, b3738, b1185, b1681	2DGLCptspp, ACGAptspp, ACMANAptspp, ACMUMptspp, ARBTptspp, ASCBptspp, ATPS4rpp, CELBpts, CHTBSptspp, DHAPT, DSBAO1, DSBAO2, FRUpts2pp, FRUptspp, GALTptspp, GAMptspp, GLCptspp, MALTptspp, MANGLYCptspp, MANptspp, MNLptspp, S2FE2SR, S2FE2SS, S2FE2SS2, S2FE2ST, S4FE4SR, S4FE4ST, SBTptspp, SUCptspp, TREptspp
9178	-49.5361	EX_succ_e	10.8056	-10	0.0694611	4	30.0575	-13.0428	25.8624	-3.81046	8.00562	b2415, b1466, b3736, b1679	2DGLCptspp, ACGAptspp, ACMANAptspp, ACMUMptspp, ARBTptspp, ASCBptspp, ATPS4rpp, CELBpts, CHTBSptspp, DHAPT, FRUpts2pp, FRUptspp, GALTptspp, GAMptspp, GLCptspp, MALTptspp, MANGLYCptspp, MANptspp, MNLptspp, S2FE2SR, S2FE2SS, S2FE2SS2, SBTptspp, SCYSDS, SUCptspp, TREptspp
9179	-49.5361	EX_succ_e	10.8056	-10	0.0694611	4	30.0575	-13.0428	25.8624	-3.81046	8.00562	b2415, b3736, b0974, b1679	2DGLCptspp, ACGAptspp, ACMANAptspp, ACMUMptspp, ARBTptspp, ASCBptspp, ATPS4rpp, CELBpts, CHTBSptspp, DHAPT, FRUpts2pp, FRUptspp, GALTptspp, GAMptspp, GLCptspp, MALTptspp, MANGLYCptspp, MANptspp, MNLptspp, S2FE2SR, S2FE2SS, S2FE2SS2, SBTptspp, SCYSDS, SUCptspp, TREptspp
9180	-49.5361	EX_succ_e	10.8056	-10	0.0694611	4	30.0575	-13.0428	25.8624	-3.81046	8.00562	b2415, b3732, b2256, b1682	2DGLCptspp, ACGAptspp, ACMANAptspp, ACMUMptspp, ARBTptspp, ASCBptspp, ATPS4rpp, CELBpts, CHTBSptspp, DHAPT, FRUpts2pp, FRUptspp, GALTptspp, GAMptspp, GLCptspp, MALTptspp, MANGLYCptspp, MANptspp, MNLptspp, S2FE2SR, S2FE2SS, S2FE2SS2, S2FE2ST, S4FE4SR, S4FE4ST, SBTptspp, SUCptspp, TREptspp, UPLA4FNF
9181	-49.5361	EX_succ_e	10.8056	-10	0.0694611	4	30.0575	-13.0428	25.8624	-3.81046	8.00562	b2415, b3732, b1683, b2794	2DGLCptspp, ACGAptspp, ACMANAptspp, ACMUMptspp, ARBTptspp, ASCBptspp, ATPS4rpp, CDGR, CELBpts, CHTBSptspp, DHAPT, FRUpts2pp, FRUptspp, GALTptspp, GAMptspp, GLCptspp, MALTptspp, MANGLYCptspp, MANptspp, MNLptspp, S2FE2SR, S2FE2SS, S2FE2SS2, S2FE2ST, S4FE4SR, S4FE4ST, SBTptspp, SUCptspp, TREptspp
9182	-49.5361	EX_succ_e	10.8056	-10	0.0694611	4	30.0575	-13.0428	25.8624	-3.81046	8.00562	b2415, b3736, b1680, b1448	2DGLCptspp, ACGAptspp, ACMANAptspp, ACMUMptspp, ARBTptspp, ASCBptspp, ATPS4rpp, CELBpts, CHTBSptspp, DHAPT, FRUpts2pp, FRUptspp, GALTptspp, GAMptspp, GLCptspp, MALTptspp, MANGLYCptspp, MANptspp, METNA, MNLptspp, S2FE2SR, S2FE2SS, S2FE2SS2, SBTptspp, SCYSDS, SUCptspp, TREptspp
9183	-49.5361	EX_succ_e	10.8056	-10	0.0694611	4	30.0575	-13.0428	25.8624	-3.81046	8.00562	b0078, b2415, b3732, b1684	2DGLCptspp, ACGAptspp, ACMANAptspp, ACMUMptspp, ARBTptspp, ASCBptspp, ATPS4rpp, CELBpts, CHTBSptspp, DHAPT, FRUpts2pp, FRUptspp, GALTptspp, GAMptspp, GLCptspp, MALTptspp, MANGLYCptspp, MANptspp, MNLptspp, S2FE2ST, S4FE4ST, SBTptspp, SUCptspp, TREptspp
9184	-49.5361	EX_succ_e	10.8056	-10	0.0694611	4	30.0575	-13.0428	25.8624	-3.81046	8.00562	b2415, b3736, b4392, b1681	2DGLCptspp, ACGAptspp, ACMANAptspp, ACMUMptspp, ARBTptspp, ASCBptspp, ATPS4rpp, CELBpts, CHTBSptspp, DHAPT, FRUpts2pp, FRUptspp, GALTptspp, GAMptspp, GLCptspp, MALTptspp, MANGLYCptspp, MANptspp, MNLptspp, S2FE2SR, S2FE2SS, S2FE2SS2, S2FE2ST, S4FE4SR, S4FE4ST, SBTptspp, SUCptspp, TREptspp
9185	-49.5361	EX_succ_e	10.8056	-10	0.0694611	4	30.0575	-13.0428	25.8624	-3.81046	8.00562	b2415, b2361, b3738, b1681	2DGLCptspp, ACGAptspp, ACMANAptspp, ACMUMptspp, ARBTptspp, ASCBptspp, ATPS4rpp, CELBpts, CHTBSptspp, DHAPT, FRUpts2pp, FRUptspp, GALTptspp, GAMptspp, GLCptspp, MALTptspp, MANGLYCptspp, MANptspp, MNLptspp, S2FE2SR, S2FE2SS, S2FE2SS2, S2FE2ST, S4FE4SR, S4FE4ST, SBTptspp, SUCptspp, TREptspp
9186	-49.5361	EX_succ_e	10.8056	-10	0.0694611	4	30.0575	-13.0428	25.8624	-3.81046	8.00562	b2415, b3736, b0092, b1682	2DGLCptspp, ACGAptspp, ACMANAptspp, ACMUMptspp, ARBTptspp, ASCBptspp, ATPS4rpp, CELBpts, CHTBSptspp, DHAPT, FRUpts2pp, FRUptspp, GALTptspp, GAMptspp, GLCptspp, MALTptspp, MANGLYCptspp, MANptspp, MNLptspp, S2FE2SR, S2FE2SS, S2FE2SS2, S2FE2ST, S4FE4SR, S4FE4ST, SBTptspp, SUCptspp, TREptspp
9187	-49.5361	EX_succ_e	10.8056	-10	0.0694611	4	30.0575	-13.0428	25.8624	-3.81046	8.00562	b2415, b3736, b2558, b1682	2DGLCptspp, ACGAptspp, ACMANAptspp, ACMUMptspp, ARBTptspp, ASCBptspp, ATPS4rpp, CELBpts, CHTBSptspp, DHAPT, FRUpts2pp, FRUptspp, GALTptspp, GAMptspp, GLCptspp, MALTptspp, MANGLYCptspp, MANptspp, MNLptspp, S2FE2SR, S2FE2SS, S2FE2SS2, S2FE2ST, S4FE4SR, S4FE4ST, SBTptspp, SUCptspp, TREptspp
9188	-49.5361	EX_succ_e	10.8056	-10	0.0694611	4	30.0575	-13.0428	25.8624	-3.81046	8.00562	b3222, b2415, b3736, b1681	2DGLCptspp, ACGAptspp, ACMANAptspp, ACMUMptspp, AMANK, ARBTptspp, ASCBptspp, ATPS4rpp, CELBpts, CHTBSptspp, DHAPT, FRUpts2pp, FRUptspp, GALTptspp, GAMptspp, GLCptspp, MALTptspp, MANGLYCptspp, MANptspp, MNLptspp, S2FE2SR, S2FE2SS, S2FE2SS2, S2FE2ST, S4FE4SR, S4FE4ST, SBTptspp, SUCptspp, TREptspp
9189	-49.5361	EX_succ_e	10.8056	-10	0.0694611	4	30.0575	-13.0428	25.8624	-3.81046	8.00562	b2415, b0061, b3736, b1682	2DGLCptspp, ACGAptspp, ACMANAptspp, ACMUMptspp, ARBTptspp, ASCBptspp, ATPS4rpp, CELBpts, CHTBSptspp, DHAPT, FRUpts2pp, FRUptspp, GALTptspp, GAMptspp, GLCptspp, MALTptspp, MANGLYCptspp, MANptspp, MNLptspp, S2FE2SR, S2FE2SS, S2FE2SS2, S2FE2ST, S4FE4SR, S4FE4ST, SBTptspp, SUCptspp, TREptspp
9190	-49.5361	EX_succ_e	10.8056	-10	0.0694611	4	30.0575	-13.0428	25.8624	-3.81046	8.00562	b1656, b2415, b3736, b2679	2DGLCptspp, ACGAptspp, ACMANAptspp, ACMUMptspp, ARBTptspp, ASCBptspp, ATPS4rpp, CELBpts, CHTBSptspp, CRNDabcpp, CRNabcpp, CTBTabcpp, DHAPT, FRUpts2pp, FRUptspp, GALTptspp, GAMptspp, GLCptspp, MALTptspp, MANGLYCptspp, MANptspp, MNLptspp, PROabcpp, SBTptspp, SUCptspp, TREptspp
9191	-49.5361	EX_succ_e	10.8056	-10	0.0694611	4	30.0575	-13.0428	25.8624	-3.81046	8.00562	b2415, b3732, b0404, b0463	2DGLCptspp, ACGAptspp, ACMANAptspp, ACMUMptspp, ARBTptspp, ASCBptspp, ATPS4rpp, CELBpts, CHTBSptspp, CMtpp, DHAPT, DOXRBCNtpp, FA100ACPHi, FA120ACPHi, FA140ACPHi, FA141ACPHi, FA160ACPHi, FA161ACPHi, FA80ACPHi, FRUpts2pp, FRUptspp, FUSAtpp, GALTptspp, GAMptspp, GLCptspp, MALTptspp, MANGLYCptspp, MANptspp, MINCYCtpp, MNLptspp, NOVBCNtpp, RFAMPtpp, SBTptspp, SUCptspp, TREptspp, TTRCYCtpp
9192	-49.5361	EX_succ_e	10.8056	-10	0.0694611	4	30.0575	-13.0428	25.8624	-3.81046	8.00562	b2415, b3732, b1981, b4132	2DGLCptspp, ACGAptspp, ACMANAptspp, ACMUMptspp, ARBTptspp, ASCBptspp, ATPS4rpp, CADVtpp, CELBpts, CHTBSptspp, DHAPT, FRUpts2pp, FRUptspp, GALTptspp, GAMptspp, GLCptspp, MALTptspp, MANGLYCptspp, MANptspp, MNLptspp, SBTptspp, SKMt2pp, SUCptspp, TREptspp
9193	-49.5361	EX_succ_e	10.8056	-10	0.0694611	4	30.0575	-13.0428	25.8624	-3.81046	8.00562	b2415, b3736, b4213, b1679	23PDE2pp, 23PDE4pp, 23PDE7pp, 23PDE9pp, 2DGLCptspp, ACGAptspp, ACMANAptspp, ACMUMptspp, ARBTptspp, ASCBptspp, ATPS4rpp, CELBpts, CHTBSptspp, DHAPT, FRUpts2pp, FRUptspp, GALTptspp, GAMptspp, GLCptspp, MALTptspp, MANGLYCptspp, MANptspp, MNLptspp, S2FE2SR, S2FE2SS, S2FE2SS2, SBTptspp, SCYSDS, SUCptspp, TREptspp
9194	-49.5361	EX_succ_e	10.8056	-10	0.0694611	4	30.0575	-13.0428	25.8624	-3.81046	8.00562	b3831, b2415, b2964, b3732	2DGLCptspp, ACGAptspp, ACMANAptspp, ACMUMptspp, ARBTptspp, ASCBptspp, ATPS4rpp, CELBpts, CHTBSptspp, DGSNt2pp, DHAPT, DINSt2pp, FRUpts2pp, FRUptspp, GALTptspp, GAMptspp, GLCptspp, GSNt2pp, MALTptspp, MANGLYCptspp, MANptspp, MNLptspp, PYNP2r, SBTptspp, SUCptspp, TREptspp
9195	-49.5361	EX_succ_e	10.8056	-10	0.0694611	4	30.0575	-13.0428	25.8624	-3.81046	8.00562	b3092, b2415, b3137, b3732	2DGLCptspp, ACGAptspp, ACMANAptspp, ACMUMptspp, ARBTptspp, ASCBptspp, ATPS4rpp, CELBpts, CHTBSptspp, DHAPT, FRUpts2pp, FRUptspp, GALTptspp, GAMptspp, GLCptspp, GUI1, GUI2, MALTptspp, MANGLYCptspp, MANptspp, MNLptspp, SBTptspp, SUCptspp, TREptspp
9196	-49.5361	EX_succ_e	10.8056	-10	0.0694611	4	30.0575	-13.0428	25.8624	-3.81046	8.00562	b3617, b2415, b3732, b1300	2DGLCptspp, 3HPADHi, ACGAptspp, ACMANAptspp, ACMUMptspp, ARBTptspp, ASCBptspp, ATPS4rpp, CELBpts, CHTBSptspp, DHAPT, FRUpts2pp, FRUptspp, GALTptspp, GAMptspp, GGGABADr, GLCptspp, GLYAT, MALTptspp, MANGLYCptspp, MANptspp, MNLptspp, SBTptspp, SUCptspp, TREptspp
9197	-49.5361	EX_succ_e	10.8056	-10	0.0694611	4	30.0575	-13.0428	25.8624	-3.81046	8.00562	b2415, b3732, b3737, b3432	2DGLCptspp, ACGAptspp, ACMANAptspp, ACMUMptspp, ARBTptspp, ASCBptspp, ATPS4rpp, CELBpts, CHTBSptspp, DHAPT, FRUpts2pp, FRUptspp, GALTptspp, GAMptspp, GLBRAN2, GLCptspp, MALTptspp, MANGLYCptspp, MANptspp, MNLptspp, SBTptspp, SUCptspp, TREptspp
9198	-49.5361	EX_succ_e	10.8056	-10	0.0694611	4	30.0575	-13.0428	25.8624	-3.81046	8.00562	b2415, b0575, b3736, b3432	2DGLCptspp, ACGAptspp, ACMANAptspp, ACMUMptspp, AGt3, ARBTptspp, ASCBptspp, ATPS4rpp, CELBpts, CHTBSptspp, CUt3, DHAPT, FRUpts2pp, FRUptspp, GALTptspp, GAMptspp, GLBRAN2, GLCptspp, MALTptspp, MANGLYCptspp, MANptspp, MNLptspp, SBTptspp, SUCptspp, TREptspp
9199	-49.5361	EX_succ_e	10.8056	-10	0.0694611	4	30.0575	-13.0428	25.8624	-3.81046	8.00562	b2415, b4015, b3736, b2131	2DGLCptspp, ACGAptspp, ACMANAptspp, ACMUMptspp, ARBTptspp, ASCBptspp, ATPS4rpp, CELBpts, CHLabcpp, CHTBSptspp, DHAPT, FRUpts2pp, FRUptspp, GALTptspp, GAMptspp, GLCptspp, ICL, MALTptspp, MANGLYCptspp, MANptspp, MNLptspp, SBTptspp, SUCptspp, TREptspp
9200	-49.5361	EX_succ_e	10.8056	-10	0.0694611	4	30.0575	-13.0428	25.8624	-3.81046	8.00562	b2415, b3732, b0855, b4141	2DGLCptspp, ACGAptspp, ACMANAptspp, ACMUMptspp, ARBTptspp, ASCBptspp, ATPS4rpp, CELBpts, CHTBSptspp, DHAPT, FRUpts2pp, FRUptspp, GALTptspp, GAMptspp, GLCptspp, ILEt3pp, MALTptspp, MANGLYCptspp, MANptspp, MNLptspp, SBTptspp, SUCptspp, TREptspp
9201	-49.5361	EX_succ_e	10.8056	-10	0.0694611	4	30.0575	-13.0428	25.8624	-3.81046	8.00562	b2415, b3732, b0756, b4141	2DGLCptspp, ACGAptspp, ACMANAptspp, ACMUMptspp, ARBTptspp, ASCBptspp, ATPS4rpp, CELBpts, CHTBSptspp, DHAPT, FRUpts2pp, FRUptspp, GALM2pp, GALTptspp, GAMptspp, GLCptspp, ILEt3pp, MALTptspp, MANGLYCptspp, MANptspp, MNLptspp, SBTptspp, SUCptspp, TREptspp
9202	-49.5361	EX_succ_e	10.8056	-10	0.0694611	4	30.0575	-13.0428	25.8624	-3.81046	8.00562	b2415, b2976, b3736, b3572	2DGLCptspp, ACGAptspp, ACMANAptspp, ACMUMptspp, ARBTptspp, ASCBptspp, ATPS4rpp, CELBpts, CHTBSptspp, DHAPT, FRUpts2pp, FRUptspp, GALTptspp, GAMptspp, GLCptspp, MALTptspp, MANGLYCptspp, MANptspp, MNLptspp, SBTptspp, SUCptspp, TREptspp, VPAMTr
9203	-49.5361	EX_succ_e	10.8056	-10	0.0694611	4	30.0575	-13.0428	25.8624	-3.81046	8.00562	b2415, b3732, b3599, b3572	2DGLCptspp, ACGAptspp, ACMANAptspp, ACMUMptspp, ARBTptspp, ASCBptspp, ATPS4rpp, CELBpts, CHTBSptspp, DHAPT, FRUpts2pp, FRUptspp, GALTptspp, GAMptspp, GLCptspp, MALTptspp, MANGLYCptspp, MANptspp, MNLptspp, SBTptspp, SUCptspp, TREptspp, VPAMTr
9204	-49.5361	EX_succ_e	10.8056	-10	0.0694611	4	30.0575	-13.0428	25.8624	-3.81046	8.00562	b3788, b2415, b3732, b3572	2DGLCptspp, ACGAptspp, ACMANAptspp, ACMUMptspp, ARBTptspp, ASCBptspp, ATPS4rpp, CELBpts, CHTBSptspp, DHAPT, FRUpts2pp, FRUptspp, GALTptspp, GAMptspp, GLCptspp, MALTptspp, MANGLYCptspp, MANptspp, MNLptspp, SBTptspp, SUCptspp, TREptspp, VPAMTr
9205	-49.5361	EX_succ_e	10.8056	-10	0.0694611	4	30.0575	-13.0428	25.8624	-3.81046	8.00562	b2415, b2601, b3736, b3572	2DGLCptspp, ACGAptspp, ACMANAptspp, ACMUMptspp, ARBTptspp, ASCBptspp, ATPS4rpp, CELBpts, CHTBSptspp, DHAPT, FRUpts2pp, FRUptspp, GALTptspp, GAMptspp, GLCptspp, MALTptspp, MANGLYCptspp, MANptspp, MNLptspp, SBTptspp, SUCptspp, TREptspp, VPAMTr
9206	-49.5361	EX_succ_e	10.8056	-10	0.0694611	4	30.0575	-13.0428	25.8624	-3.81046	8.00562	b2415, b3736, b1301, b1285	2DGLCptspp, ACGAptspp, ACMANAptspp, ACMUMptspp, ARBTptspp, ASCBptspp, ATPS4rpp, CELBpts, CHTBSptspp, DHAPT, FRUpts2pp, FRUptspp, GALTptspp, GAMptspp, GGPTRCO, GLCptspp, LDGUNPD, MALTptspp, MANGLYCptspp, MANptspp, MNLptspp, SBTptspp, SUCptspp, TREptspp
9207	-49.5361	EX_succ_e	10.8056	-10	0.0694611	4	30.0575	-13.0428	25.8624	-3.81046	8.00562	b0963, b2415, b4079, b3736	2DGLCptspp, ACGAptspp, ACMANAptspp, ACMUMptspp, ARBTptspp, ASCBptspp, ATPS4rpp, CELBpts, CHTBSptspp, DHAPT, FHL, FRUpts2pp, FRUptspp, GALTptspp, GAMptspp, GLCptspp, MALTptspp, MANGLYCptspp, MANptspp, MGSA, MNLptspp, SBTptspp, SUCptspp, TREptspp
9208	-49.5361	EX_succ_e	10.8056	-10	0.0694611	4	30.0575	-13.0428	25.8624	-3.81046	8.00562	b0963, b2415, b2180, b3738	2DGLCptspp, ACGAptspp, ACMANAptspp, ACMUMptspp, ARBTptspp, ASCBptspp, ATPS4rpp, CELBpts, CHTBSptspp, DHAPT, FRUpts2pp, FRUptspp, GALTptspp, GAMptspp, GLCptspp, MALTptspp, MANGLYCptspp, MANptspp, MGSA, MNLptspp, SBTptspp, SUCptspp, TREptspp
9209	-49.5361	EX_succ_e	10.8056	-10	0.0694611	4	30.0575	-13.0428	25.8624	-3.81046	8.00562	b2415, b3736, b0432, b2877	2DGLCptspp, ACGAptspp, ACMANAptspp, ACMUMptspp, ARBTptspp, ASCBptspp, ATPS4rpp, CELBpts, CHTBSptspp, CYTBO3_4pp, DHAPT, FRUpts2pp, FRUptspp, GALTptspp, GAMptspp, GLCptspp, MALTptspp, MANGLYCptspp, MANptspp, MNLptspp, MOCDS, SBTptspp, SUCptspp, TREptspp
9210	-49.5361	EX_succ_e	10.8056	-10	0.0694611	4	30.0575	-13.0428	25.8624	-3.81046	8.00562	b1993, b2415, b3736, b0430	2DGLCptspp, ACBIPGT, ACGAptspp, ACMANAptspp, ACMUMptspp, ADOCBIK, ARBTptspp, ASCBptspp, ATPS4rpp, CELBpts, CHTBSptspp, CYTBO3_4pp, DHAPT, FRUpts2pp, FRUptspp, GALTptspp, GAMptspp, GLCptspp, MALTptspp, MANGLYCptspp, MANptspp, MNLptspp, SBTptspp, SUCptspp, TREptspp
9211	-49.5361	EX_succ_e	10.8056	-10	0.0694611	4	30.0575	-13.0428	25.8624	-3.81046	8.00562	b2415, b3732, b0755, b0432	2DGLCptspp, ACGAptspp, ACMANAptspp, ACMUMptspp, ARBTptspp, ASCBptspp, ATPS4rpp, CELBpts, CHTBSptspp, CYTBO3_4pp, DHAPT, FRUpts2pp, FRUptspp, GALTptspp, GAMptspp, GLCptspp, MALTptspp, MANGLYCptspp, MANptspp, MNLptspp, SBTptspp, SUCptspp, TREptspp
9212	-49.5361	EX_succ_e	10.8056	-10	0.0694611	4	30.0575	-13.0428	25.8624	-3.81046	8.00562	b0073, b2415, b3732, b0432	2DGLCptspp, ACGAptspp, ACMANAptspp, ACMUMptspp, ARBTptspp, ASCBptspp, ATPS4rpp, CELBpts, CHTBSptspp, CYTBO3_4pp, DHAPT, FRUpts2pp, FRUptspp, GALTptspp, GAMptspp, GLCptspp, MALTptspp, MANGLYCptspp, MANptspp, MNLptspp, SBTptspp, SUCptspp, TREptspp
9213	-49.5361	EX_succ_e	10.8056	-10	0.0694611	4	30.0575	-13.0428	25.8624	-3.81046	8.00562	b2415, b3736, b0484, b0430	2DGLCptspp, ACGAptspp, ACMANAptspp, ACMUMptspp, ARBTptspp, ASCBptspp, ATPS4rpp, CELBpts, CHTBSptspp, CU1abcpp, CYTBO3_4pp, DHAPT, FRUpts2pp, FRUptspp, GALTptspp, GAMptspp, GLCptspp, MALTptspp, MANGLYCptspp, MANptspp, MNLptspp, SBTptspp, SUCptspp, TREptspp
9214	-49.5361	EX_succ_e	10.8056	-10	0.0694611	4	30.0575	-13.0428	25.8624	-3.81046	8.00562	b2415, b3736, b0429, b2134	2DGLCptspp, ACGAptspp, ACMANAptspp, ACMUMptspp, ARBTptspp, ASCBptspp, ATPS4rpp, CELBpts, CHTBSptspp, CYTBO3_4pp, DHAPT, FRUpts2pp, FRUptspp, GALTptspp, GAMptspp, GLCptspp, MALTptspp, MANGLYCptspp, MANptspp, MNLptspp, SBTptspp, SUCptspp, TREptspp
9215	-49.5361	EX_succ_e	10.8056	-10	0.0694611	4	30.0575	-13.0428	25.8624	-3.81046	8.00562	b3197, b2415, b3732, b0432	2DGLCptspp, ACGAptspp, ACMANAptspp, ACMUMptspp, ARBTptspp, ASCBptspp, ATPS4rpp, CELBpts, CHTBSptspp, CYTBO3_4pp, DHAPT, FRUpts2pp, FRUptspp, GALTptspp, GAMptspp, GLCptspp, MALTptspp, MANGLYCptspp, MANptspp, MNLptspp, SBTptspp, SUCptspp, TREptspp
9216	-49.5361	EX_succ_e	10.8056	-10	0.0694611	4	30.0575	-13.0428	25.8624	-3.81046	8.00562	b2415, b3736, b1483, b0429	2DGLCptspp, ACGAptspp, ACMANAptspp, ACMUMptspp, ARBTptspp, ASCBptspp, ATPS4rpp, CELBpts, CHTBSptspp, CYTBO3_4pp, DHAPT, FRUpts2pp, FRUptspp, GALTptspp, GAMptspp, GLCptspp, MALTptspp, MANGLYCptspp, MANptspp, MNLptspp, SBTptspp, SUCptspp, TREptspp
9217	-49.5361	EX_succ_e	10.8056	-10	0.0694611	4	30.0575	-13.0428	25.8624	-3.81046	8.00562	b2415, b0062, b3736, b1090	2DGLCptspp, ACGAptspp, ACMANAptspp, ACMUMptspp, ACPPAT120, ACPPAT140, ACPPAT141, ACPPAT160, ACPPAT161, ACPPAT180, ACPPAT181, ARAI, ARBTptspp, ASCBptspp, ATPS4rpp, CELBpts, CHTBSptspp, DHAPT, FRUpts2pp, FRUptspp, GALTptspp, GAMptspp, GLCptspp, MALTptspp, MANGLYCptspp, MANptspp, MNLptspp, SBTptspp, SUCptspp, TREptspp
9218	-49.5361	EX_succ_e	10.8056	-10	0.0694611	4	30.0575	-13.0428	25.8624	-3.81046	8.00562	b2415, b4072, b3738, b3543	2DGLCptspp, ACGAptspp, ACMANAptspp, ACMUMptspp, ARBTptspp, ASCBptspp, ATPS4rpp, CELBpts, CGLYabcpp, CHTBSptspp, DHAPT, FRUpts2pp, FRUptspp, GALTptspp, GAMptspp, GLCptspp, MALTptspp, MANGLYCptspp, MANptspp, MNLptspp, NTRIR3pp, NTRIR4pp, PROGLYabcpp, SBTptspp, SUCptspp, TREptspp
9219	-49.5361	EX_succ_e	10.8056	-10	0.0694611	4	30.0575	-13.0428	25.8624	-3.81046	8.00562	b2041, b2415, b3732, b1745	2DGLCptspp, ACGAptspp, ACMANAptspp, ACMUMptspp, ARBTptspp, ASCBptspp, ATPS4rpp, CELBpts, CHTBSptspp, DHAPT, FRUpts2pp, FRUptspp, GALTptspp, GAMptspp, GLCptspp, MALTptspp, MANGLYCptspp, MANptspp, MNLptspp, SADH, SBTptspp, SUCptspp, TREptspp
9220	-49.5361	EX_succ_e	10.8056	-10	0.0694611	4	30.0575	-13.0428	25.8624	-3.81046	8.00562	b1744, b2415, b3732, b1476	2DGLCptspp, ACGAptspp, ACMANAptspp, ACMUMptspp, ARBTptspp, ASCBptspp, ATPS4rpp, CELBpts, CHTBSptspp, DHAPT, FRUpts2pp, FRUptspp, GALTptspp, GAMptspp, GLCptspp, MALTptspp, MANGLYCptspp, MANptspp, MNLptspp, SBTptspp, SGDS, SUCptspp, TREptspp
9221	-49.5361	EX_succ_e	10.8056	-10	0.0694611	4	30.0575	-13.0428	25.8624	-3.81046	8.00562	b2415, b1748, b3397, b3736	2DGLCptspp, ACGAptspp, ACMANAptspp, ACMUMptspp, ARBTptspp, ASCBptspp, ATPS4rpp, CELBpts, CHTBSptspp, DHAPT, FRUpts2pp, FRUptspp, GALTptspp, GAMptspp, GLCptspp, MALTptspp, MANGLYCptspp, MANptspp, MNLptspp, SBTptspp, SOTA, SUCptspp, TREptspp
9222	-49.5361	EX_succ_e	10.8056	-10	0.0694611	4	30.0575	-13.0428	25.8624	-3.81046	8.00562	b2415, b2482, b3736, b1745	2DGLCptspp, ACGAptspp, ACMANAptspp, ACMUMptspp, ARBTptspp, ASCBptspp, ATPS4rpp, CELBpts, CHTBSptspp, DHAPT, FRUpts2pp, FRUptspp, GALTptspp, GAMptspp, GLCptspp, MALTptspp, MANGLYCptspp, MANptspp, MNLptspp, SADH, SBTptspp, SUCptspp, TREptspp
9223	-49.5361	EX_succ_e	10.8056	-10	0.0694611	4	30.0575	-13.0428	25.8624	-3.81046	8.00562	b2415, b1746, b0350, b3738	2DGLCptspp, ACGAptspp, ACMANAptspp, ACMUMptspp, ARBTptspp, ASCBptspp, ATPS4rpp, CELBpts, CHTBSptspp, DHAPT, FRUpts2pp, FRUptspp, GALTptspp, GAMptspp, GLCptspp, MALTptspp, MANGLYCptspp, MANptspp, MNLptspp, OP4ENH, SBTptspp, SGSAD, SUCptspp, TREptspp
9224	-49.5361	EX_succ_e	10.8056	-10	0.0694611	4	30.0575	-13.0428	25.8624	-3.81046	8.00562	b2415, b1746, b3736, b4093	2DGLCptspp, ACGAptspp, ACMANAptspp, ACMUMptspp, AMPNTAT, ARBTptspp, ASCBptspp, ATPS4rpp, CELBpts, CHTBSptspp, DHAPT, FRUpts2pp, FRUptspp, GALTptspp, GAMptspp, GLCptspp, MALTptspp, MANGLYCptspp, MANptspp, MNLptspp, SBTptspp, SGSAD, SUCptspp, TREptspp
9225	-49.5361	EX_succ_e	10.8056	-10	0.0694611	4	30.0575	-13.0428	25.8624	-3.81046	8.00562	b2415, b1746, b3736, b0315	2DGLCptspp, ACGAptspp, ACMANAptspp, ACMUMptspp, ARBTptspp, ASCBptspp, ATPS4rpp, CELBpts, CHTBSptspp, DHAPT, FRUpts2pp, FRUptspp, GALTptspp, GAMptspp, GLCptspp, MALTptspp, MANGLYCptspp, MANptspp, MNLptspp, SBTptspp, SGSAD, SUCptspp, TREptspp
9226	-49.5361	EX_succ_e	10.8056	-10	0.0694611	4	30.0575	-13.0428	25.8624	-3.81046	8.00562	b4054, b2415, b1748, b3732	2DGLCptspp, ACGAptspp, ACMANAptspp, ACMUMptspp, ARBTptspp, ASCBptspp, ATPS4rpp, CELBpts, CHTBSptspp, DHAPT, FRUpts2pp, FRUptspp, GALTptspp, GAMptspp, GLCptspp, MALTptspp, MANGLYCptspp, MANptspp, MNLptspp, SBTptspp, SOTA, SUCptspp, TREptspp
9227	-49.5361	EX_succ_e	10.8056	-10	0.0694611	4	30.0575	-13.0428	25.8624	-3.81046	8.00562	b1744, b2415, b3732, b4090	2DGLCptspp, ACGAptspp, ACMANAptspp, ACMUMptspp, ALLPI, ARBTptspp, ASCBptspp, ATPS4rpp, CELBpts, CHTBSptspp, DHAPT, FRUpts2pp, FRUptspp, GALTptspp, GAMptspp, GLCptspp, MALTptspp, MANGLYCptspp, MANptspp, MNLptspp, SBTptspp, SGDS, SUCptspp, TREptspp
9228	-49.5361	EX_succ_e	10.8056	-10	0.0694611	4	30.0575	-13.0428	25.8624	-3.81046	8.00562	b1744, b2415, b3736, b4105	2DGLCptspp, ACGAptspp, ACMANAptspp, ACMUMptspp, ARBTptspp, ASCBptspp, ATPS4rpp, CELBpts, CHTBSptspp, DHAPT, FRUpts2pp, FRUptspp, GALTptspp, GAMptspp, GLCptspp, MALTptspp, MANGLYCptspp, MANptspp, MEPNabcpp, MNLptspp, SBTptspp, SGDS, SUCptspp, TREptspp
9229	-49.5361	EX_succ_e	10.8056	-10	0.0694611	4	30.0575	-13.0428	25.8624	-3.81046	8.00562	b2415, b1603, b3736, b3432	2DGLCptspp, ACGAptspp, ACMANAptspp, ACMUMptspp, ARBTptspp, ASCBptspp, ATPS4rpp, CELBpts, CHTBSptspp, DHAPT, FRUpts2pp, FRUptspp, GALTptspp, GAMptspp, GLBRAN2, GLCptspp, MALTptspp, MANGLYCptspp, MANptspp, MNLptspp, SBTptspp, SUCptspp, THD2pp, TREptspp
9230	-49.5361	EX_succ_e	10.8056	-10	0.0694611	4	30.0575	-13.0428	25.8624	-3.81046	8.00562	b2920, b2415, b0365, b3736	2DGLCptspp, ACGAptspp, ACMANAptspp, ACMUMptspp, ARBTptspp, ASCBptspp, ATPS4rpp, CELBpts, CHTBSptspp, DHAPT, FRUpts2pp, FRUptspp, GALTptspp, GAMptspp, GLCptspp, MALTptspp, MANGLYCptspp, MANptspp, MNLptspp, PPCSCT, SBTptspp, SUCptspp, TAURabcpp, TREptspp
9231	-49.5361	EX_succ_e	10.8056	-10	0.0694611	4	30.0575	-13.0428	25.8624	-3.81046	8.00562	b2436, b2415, b3736, b3715	2DGLCptspp, ACGAptspp, ACMANAptspp, ACMUMptspp, ARBTptspp, ASCBptspp, ATPS4rpp, CELBpts, CHTBSptspp, CPPPGO, DHAPT, FRUpts2pp, FRUptspp, GALTptspp, GAMptspp, GLCptspp, MALTptspp, MANGLYCptspp, MANptspp, MNLptspp, SBTptspp, SUCptspp, TREptspp
9232	-49.5361	EX_succ_e	10.8056	-10	0.0694611	4	30.0575	-13.0428	25.8624	-3.81046	8.00562	b2415, b1768, b3732, b4129	2DGLCptspp, ACGAptspp, ACMANAptspp, ACMUMptspp, AP4AS, ARBTptspp, ASCBptspp, ATPS4rpp, CELBpts, CHTBSptspp, DHAPT, FRUpts2pp, FRUptspp, GALTptspp, GAMptspp, GLCptspp, MALTptspp, MANGLYCptspp, MANptspp, MNLptspp, NNAM, SBTptspp, SUCptspp, TREptspp
9233	-49.5361	EX_succ_e	10.8056	-10	0.0694611	4	30.0575	-13.0428	25.8624	-3.81046	8.00562	b2415, b2675, b3736, b1397	2DGLCptspp, 3OXCOAT, ACGAptspp, ACMANAptspp, ACMUMptspp, ARBTptspp, ASCBptspp, ATPS4rpp, CELBpts, CHTBSptspp, DHAPT, FRUpts2pp, FRUptspp, GALTptspp, GAMptspp, GLCptspp, MALTptspp, MANGLYCptspp, MANptspp, MNLptspp, OXDHCOAT, RNDR1b, RNDR2b, RNDR3b, RNDR4b, SBTptspp, SUCptspp, TREptspp
9234	-49.5361	EX_succ_e	10.8056	-10	0.0694611	4	30.0575	-13.0428	25.8624	-3.81046	8.00562	b2415, b0480, b3736, b4290	2DGLCptspp, ACGAptspp, ACMANAptspp, ACMUMptspp, ARBTptspp, ASCBptspp, ATPS4rpp, CELBpts, CHTBSptspp, DHAPT, FE3DCITabcpp, FRUpts2pp, FRUptspp, GALTptspp, GAMptspp, GLCptspp, MALTptspp, MANGLYCptspp, MANptspp, MNLptspp, SBTptspp, SUCptspp, TREptspp, UACGALPpp, UACGAMPpp, UDPGALPpp, UDPGPpp, UGLCURPpp
9235	-49.5361	EX_succ_e	10.8056	-10	0.0694611	4	30.0575	-13.0428	25.8624	-3.81046	8.00562	b2415, b0411, b3732, b0856	2DGLCptspp, ACGAptspp, ACMANAptspp, ACMUMptspp, ADNtex, ARBTptspp, ASCBptspp, ATPS4rpp, CELBpts, CHTBSptspp, DADNtex, DCYTtex, DHAPT, DURItex, FRUpts2pp, FRUptspp, GALTptspp, GAMptspp, GLCptspp, GUAtex, INStex, MALTptspp, MANGLYCptspp, MANptspp, MNLptspp, SBTptspp, SUCptspp, TREptspp, URItex
9236	-49.5361	EX_succ_e	10.8056	-10	0.0694611	4	30.0575	-13.0428	25.8624	-3.81046	8.00562	b2415, b0411, b4193, b3736	2DGLCptspp, ACGAptspp, ACMANAptspp, ACMUMptspp, ADNtex, ARBTptspp, ASCBptspp, ATPS4rpp, CELBpts, CHTBSptspp, DADNtex, DCYTtex, DHAPT, DURItex, FRUpts2pp, FRUptspp, GALTptspp, GAMptspp, GLCptspp, GUAtex, INStex, MALTptspp, MANGLYCptspp, MANptspp, MNLptspp, SBTptspp, SUCptspp, TREptspp, URItex
9237	-49.5361	EX_succ_e	10.8056	-10	0.0694611	4	30.0575	-13.0428	25.8624	-3.81046	8.00562	b2415, b0411, b3385, b3736	2DGLCptspp, ACGAptspp, ACMANAptspp, ACMUMptspp, ADNtex, ARBTptspp, ASCBptspp, ATPS4rpp, CELBpts, CHTBSptspp, DADNtex, DCYTtex, DHAPT, DURItex, FRUpts2pp, FRUptspp, GALTptspp, GAMptspp, GLCptspp, GUAtex, INStex, MALTptspp, MANGLYCptspp, MANptspp, MNLptspp, PGLYCP, SBTptspp, SUCptspp, TREptspp, URItex
9238	-49.5361	EX_succ_e	10.8056	-10	0.0694611	4	30.0575	-13.0428	25.8624	-3.81046	8.00562	b2415, b0978, b3732, b1011	2DGLCptspp, ACGAptspp, ACMANAptspp, ACMUMptspp, ARBTptspp, ASCBptspp, ATPS4rpp, CELBpts, CHTBSptspp, CYTBD2pp, DHAPT, FRUpts2pp, FRUptspp, GALTptspp, GAMptspp, GLCptspp, MALTptspp, MANGLYCptspp, MANptspp, MNLptspp, SBTptspp, SUCptspp, TREptspp, URACPAH
9239	-49.5361	EX_succ_e	10.8056	-10	0.0694611	4	30.0575	-13.0428	25.8624	-3.81046	8.00562	b2415, b3736, b0789, b0514	2DGLCptspp, ACGAptspp, ACMANAptspp, ACMUMptspp, ARBTptspp, ASCBptspp, ATPS4rpp, CELBpts, CHTBSptspp, DHAPT, FRUpts2pp, FRUptspp, GALTptspp, GAMptspp, GLCptspp, GLYCK, MALTptspp, MANGLYCptspp, MANptspp, MNLptspp, SBTptspp, SUCptspp, TREptspp
9240	-49.5361	EX_succ_e	10.8056	-10	0.0694611	4	30.0575	-13.0428	25.8624	-3.81046	8.00562	b4196, b2415, b3732, b0514	2DGLCptspp, ACGAptspp, ACMANAptspp, ACMUMptspp, ARBTptspp, ASCBptspp, ATPS4rpp, CELBpts, CHTBSptspp, DHAPT, FRUpts2pp, FRUptspp, GALTptspp, GAMptspp, GLCptspp, GLYCK, MALTptspp, MANGLYCptspp, MANptspp, MNLptspp, SBTptspp, SUCptspp, TREptspp
9241	-49.5361	EX_succ_e	10.8056	-10	0.0694611	4	30.0575	-13.0428	25.8624	-3.81046	8.00562	b2415, b3736, b2093, b3116	2DGLCptspp, ACGAptspp, ACMANAptspp, ACMUMptspp, ARBTptspp, ASCBptspp, ATPS4rpp, CELBpts, CHTBSptspp, DHAPT, FRUpts2pp, FRUptspp, GALTptspp, GAMptspp, GLCptspp, MALTptspp, MANGLYCptspp, MANptspp, MNLptspp, SBTptspp, SUCptspp, THRt2rpp, TREptspp
9242	-49.5361	EX_succ_e	10.8056	-10	0.0694611	4	30.0575	-13.0428	25.8624	-3.81046	8.00562	b2518, b2415, b3736, b3116	2DGLCptspp, ACGAptspp, ACMANAptspp, ACMUMptspp, ARBTptspp, ASCBptspp, ATPS4rpp, CELBpts, CHTBSptspp, DHAPT, FRUpts2pp, FRUptspp, GALTptspp, GAMptspp, GLCptspp, MALTptspp, MANGLYCptspp, MANptspp, MNLptspp, SBTptspp, SUCptspp, THRt2rpp, TREptspp
9243	-49.5361	EX_succ_e	10.8056	-10	0.0694611	4	30.0575	-13.0428	25.8624	-3.81046	8.00562	b2415, b3736, b3116, b2503	2DGLCptspp, ACGAptspp, ACMANAptspp, ACMUMptspp, ARBTptspp, ASCBptspp, ATPS4rpp, CELBpts, CHTBSptspp, DHAPT, FRUpts2pp, FRUptspp, GALTptspp, GAMptspp, GLCptspp, MALTptspp, MANGLYCptspp, MANptspp, MNLptspp, SBTptspp, SUCptspp, THRt2rpp, TREptspp
9244	-49.5361	EX_succ_e	10.8056	-10	0.0694611	4	30.0575	-13.0428	25.8624	-3.81046	8.00562	b0207, b2415, b3736, b3116	2DGLCptspp, ACGAptspp, ACMANAptspp, ACMUMptspp, ARBTptspp, ASCBptspp, ATPS4rpp, CELBpts, CHTBSptspp, DHAPT, FRUpts2pp, FRUptspp, GALTptspp, GAMptspp, GLCptspp, MALTptspp, MANGLYCptspp, MANptspp, MNLptspp, SBTptspp, SUCptspp, THRt2rpp, TREptspp
9245	-49.5361	EX_succ_e	10.8056	-10	0.0694611	4	30.0575	-13.0428	25.8624	-3.81046	8.00562	b3617, b2415, b3732, b0462	2DGLCptspp, ACGAptspp, ACMANAptspp, ACMUMptspp, ARBTptspp, ASCBptspp, ATPS4rpp, CELBpts, CHTBSptspp, DHAPT, FRUpts2pp, FRUptspp, GALTptspp, GAMptspp, GLCptspp, GLYAT, MALTptspp, MANGLYCptspp, MANptspp, MNLptspp, SBTptspp, SUCptspp, TREptspp
9246	-49.5361	EX_succ_e	10.8056	-10	0.0694611	4	30.0575	-13.0428	25.8624	-3.81046	8.00562	b3617, b2415, b2486, b3732	2DGLCptspp, ACGAptspp, ACMANAptspp, ACMUMptspp, ARBTptspp, ASCBptspp, ATPS4rpp, CELBpts, CHTBSptspp, DHAPT, FRUpts2pp, FRUptspp, GALTptspp, GAMptspp, GLCptspp, GLYAT, MALTptspp, MANGLYCptspp, MANptspp, MNLptspp, SBTptspp, SUCptspp, TREptspp
9247	-49.5361	EX_succ_e	10.8056	-10	0.0694611	4	30.0575	-13.0428	25.8624	-3.81046	8.00562	b3617, b1612, b2415, b3738	2DGLCptspp, ACGAptspp, ACMANAptspp, ACMUMptspp, ARBTptspp, ASCBptspp, ATPS4rpp, CELBpts, CHTBSptspp, DHAPT, FRUpts2pp, FRUptspp, GALTptspp, GAMptspp, GLCptspp, GLYAT, MALTptspp, MANGLYCptspp, MANptspp, MNLptspp, SBTptspp, SUCptspp, TREptspp
9248	-49.5361	EX_succ_e	10.8056	-10	0.0694611	4	30.0575	-13.0428	25.8624	-3.81046	8.00562	b2415, b1236, b3732, b3728	2DGLCptspp, ACGAptspp, ACMANAptspp, ACMUMptspp, ARBTptspp, ASCBptspp, ATPS4rpp, CELBpts, CHTBSptspp, DHAPT, FRUpts2pp, FRUptspp, GALTptspp, GALUi, GAMptspp, GLCptspp, MALTptspp, MANGLYCptspp, MANptspp, MNLptspp, PIuabcpp, SBTptspp, SUCptspp, TREptspp
9249	-49.5361	EX_succ_e	10.8056	-10	0.0694611	4	30.0575	-13.0428	25.8624	-3.81046	8.00562	b2415, b3738, b3371, b4020	2DGLCptspp, ACGAptspp, ACMANAptspp, ACMUMptspp, ARBTptspp, ASCBptspp, ATPS4rpp, CELBpts, CHTBSptspp, DHAPT, FRULYSDG, FRUpts2pp, FRUptspp, GALTptspp, GAMptspp, GLCptspp, MALTptspp, MANGLYCptspp, MANptspp, MNLptspp, PItpp, SBTptspp, SUCptspp, TREptspp
9250	-49.5361	EX_succ_e	10.8056	-10	0.0694611	4	30.0575	-13.0428	25.8624	-3.81046	8.00562	b3588, b2415, b3732, b4020	2DGLCptspp, ACGAptspp, ACMANAptspp, ACMUMptspp, ARBTptspp, ASCBptspp, ATPS4rpp, CELBpts, CHTBSptspp, DHAPT, FRUpts2pp, FRUptspp, GALTptspp, GAMptspp, GLCptspp, MALTptspp, MANGLYCptspp, MANptspp, MNLptspp, PItpp, SBTptspp, SUCptspp, TREptspp
9251	-49.5361	EX_succ_e	10.8056	-10	0.0694611	4	30.0575	-13.0428	25.8624	-3.81046	8.00562	b3429, b2415, b3583, b3738	2DGLCptspp, ACGAptspp, ACMANAptspp, ACMUMptspp, ARBTptspp, ASCBptspp, ATPS4rpp, CELBpts, CHTBSptspp, DHAPT, FRUpts2pp, FRUptspp, GALTptspp, GAMptspp, GLCS1, GLCptspp, MALTptspp, MANGLYCptspp, MANptspp, MNLptspp, SBTptspp, SUCptspp, TREptspp
9252	-49.5361	EX_succ_e	10.8056	-10	0.0694611	4	30.0575	-13.0428	25.8624	-3.81046	8.00562	b3430, b2415, b3732, b2154	2DGLCptspp, ACGAptspp, ACMANAptspp, ACMUMptspp, ARBTptspp, ASCBptspp, ATPS4rpp, CELBpts, CHTBSptspp, DHAPT, FRUpts2pp, FRUptspp, GALTptspp, GAMptspp, GLCptspp, GLGC, MALTptspp, MANGLYCptspp, MANptspp, MNLptspp, SBTptspp, SUCptspp, TREptspp
9253	-49.5361	EX_succ_e	10.8056	-10	0.0694611	4	30.0575	-13.0428	25.8624	-3.81046	8.00562	b3430, b2415, b3732, b1341	2DGLCptspp, ACGAptspp, ACMANAptspp, ACMUMptspp, ARBTptspp, ASCBptspp, ATPS4rpp, CELBpts, CHTBSptspp, DHAPT, FRUpts2pp, FRUptspp, GALTptspp, GAMptspp, GLCptspp, GLGC, MALTptspp, MANGLYCptspp, MANptspp, MNLptspp, SBTptspp, SUCptspp, TREptspp
9254	-49.5361	EX_succ_e	10.8056	-10	0.0694611	4	30.0575	-13.0428	25.8624	-3.81046	8.00562	b3429, b2415, b3732, b3892	2DGLCptspp, ACGAptspp, ACMANAptspp, ACMUMptspp, ARBTptspp, ASCBptspp, ATPS4rpp, CELBpts, CHTBSptspp, DHAPT, FRUpts2pp, FRUptspp, GALTptspp, GAMptspp, GLCS1, GLCptspp, MALTptspp, MANGLYCptspp, MANptspp, MNLptspp, SBTptspp, SUCptspp, TREptspp
9255	-49.5361	EX_succ_e	10.8056	-10	0.0694611	4	30.0575	-13.0428	25.8624	-3.81046	8.00562	b2415, b3736, b0729, b1486	2DGLCptspp, ACGAptspp, ACMANAptspp, ACMUMptspp, ARBTptspp, ASCBptspp, ATPS4rpp, CELBpts, CHTBSptspp, DHAPT, FRUpts2pp, FRUptspp, GALTptspp, GAMptspp, GLCptspp, MALTptspp, MANGLYCptspp, MANptspp, MNLptspp, SBTptspp, SUCOAS, SUCptspp, TREptspp
9256	-49.5361	EX_succ_e	10.8056	-10	0.0694611	4	30.0575	-13.0428	25.8624	-3.81046	8.00562	b0351, b2415, b3738, b0729	2DGLCptspp, ACGAptspp, ACMANAptspp, ACMUMptspp, ARBTptspp, ASCBptspp, ATPS4rpp, CELBpts, CHTBSptspp, DHAPT, FRUpts2pp, FRUptspp, GALTptspp, GAMptspp, GLCptspp, MALTptspp, MANGLYCptspp, MANptspp, MNLptspp, SBTptspp, SUCOAS, SUCptspp, TREptspp
9257	-49.5361	EX_succ_e	10.8056	-10	0.0694611	4	30.0575	-13.0428	25.8624	-3.81046	8.00562	b2415, b3736, b1927, b0729	2DGLCptspp, AAMYL, ACGAptspp, ACMANAptspp, ACMUMptspp, ARBTptspp, ASCBptspp, ATPS4rpp, CELBpts, CHTBSptspp, DHAPT, FRUpts2pp, FRUptspp, GALTptspp, GAMptspp, GLCptspp, MALTptspp, MANGLYCptspp, MANptspp, MNLptspp, SBTptspp, SUCOAS, SUCptspp, TREptspp
9258	-49.5361	EX_succ_e	10.8056	-10	0.0694611	4	30.0575	-13.0428	25.8624	-3.81046	8.00562	b2415, b3738, b4464, b0729	2DGLCptspp, ACGAptspp, ACMANAptspp, ACMUMptspp, ARBTptspp, ASCBptspp, ATPS4rpp, CELBpts, CHTBSptspp, DHAPT, FRUpts2pp, FRUptspp, GALTptspp, GAMptspp, GLCptspp, MALTptspp, MANGLYCptspp, MANptspp, MNLptspp, SBTptspp, SUCOAS, SUCptspp, TREptspp
9259	-49.5361	EX_succ_e	10.8056	-10	0.0694611	4	30.0575	-13.0428	25.8624	-3.81046	8.00562	b2415, b3732, b0728, b2174	2DGLCptspp, ACGAptspp, ACMANAptspp, ACMUMptspp, ARBTptspp, ASCBptspp, ATPS4rpp, CELBpts, CHTBSptspp, COLIPAKpp, DHAPT, FRUpts2pp, FRUptspp, GALTptspp, GAMptspp, GLCptspp, MALTptspp, MANGLYCptspp, MANptspp, MNLptspp, SBTptspp, SUCOAS, SUCptspp, TREptspp
9260	-49.5361	EX_succ_e	10.8056	-10	0.0694611	4	30.0575	-13.0428	25.8624	-3.81046	8.00562	b2415, b3736, b0729, b3253	2DGLCptspp, ACGAptspp, ACMANAptspp, ACMUMptspp, ARBTptspp, ASCBptspp, ATPS4rpp, CELBpts, CHTBSptspp, DHAPT, FRUpts2pp, FRUptspp, GALTptspp, GAMptspp, GLCptspp, MALTptspp, MANGLYCptspp, MANptspp, MNLptspp, PCNO, SBTptspp, SUCOAS, SUCptspp, TREptspp
9261	-49.5361	EX_succ_e	10.8056	-10	0.0694611	4	30.0575	-13.0428	25.8624	-3.81046	8.00562	b2415, b3732, b1186, b1394	2DGLCptspp, ACGAptspp, ACMANAptspp, ACMUMptspp, ARBTptspp, ASCBptspp, ATPS4rpp, CELBpts, CHTBSptspp, DHAPT, FRUpts2pp, FRUptspp, GALTptspp, GAMptspp, GLCptspp, MALTptspp, MANGLYCptspp, MANptspp, MNLptspp, NAt3_1p5pp, OXDHCOAT, REPHACCOAI, SBTptspp, SUCptspp, TREptspp
9262	-49.5361	EX_succ_e	10.8056	-10	0.0694611	4	30.0575	-13.0428	25.8624	-3.81046	8.00562	b3952, b2415, b3738, b2366	2DGLCptspp, ACGAptspp, ACMANAptspp, ACMUMptspp, ARBTptspp, ASCBptspp, ATPS4rpp, CELBpts, CHTBSptspp, DHAPT, FRUpts2pp, FRUptspp, GALTptspp, GAMptspp, GLCptspp, MALTptspp, MANGLYCptspp, MANptspp, MNLptspp, SBTptspp, SERD_D, SUCptspp, TREptspp
9263	-49.5361	EX_succ_e	10.8056	-10	0.0694611	4	30.0575	-13.0428	25.8624	-3.81046	8.00562	b2415, b2817, b3738, b2366	2DGLCptspp, ACGAptspp, ACMANAptspp, ACMUMptspp, ARBTptspp, ASCBptspp, ATPS4rpp, CELBpts, CHTBSptspp, DHAPT, FRUpts2pp, FRUptspp, GALTptspp, GAMptspp, GLCptspp, MALTptspp, MANGLYCptspp, MANptspp, MNLptspp, SBTptspp, SERD_D, SUCptspp, TREptspp
9264	-49.5361	EX_succ_e	10.8056	-10	0.0694611	4	30.0575	-13.0428	25.8624	-3.81046	8.00562	b4025, b2415, b1651, b3737	2DGLCptspp, ACGAptspp, ACMANAptspp, ACMUMptspp, ARBTptspp, ASCBptspp, ATPS4rpp, CELBpts, CHTBSptspp, DHAPT, FRUpts2pp, FRUptspp, GALTptspp, GAMptspp, GLCptspp, LGTHL, MALTptspp, MANGLYCptspp, MANptspp, MNLptspp, PGI, SBTptspp, SUCptspp, TREptspp
9265	-49.5361	EX_succ_e	10.8056	-10	0.0694611	4	30.0575	-13.0428	25.8624	-3.81046	8.00562	b4025, b2415, b1651, b3732	2DGLCptspp, ACGAptspp, ACMANAptspp, ACMUMptspp, ARBTptspp, ASCBptspp, ATPS4rpp, CELBpts, CHTBSptspp, DHAPT, FRUpts2pp, FRUptspp, GALTptspp, GAMptspp, GLCptspp, LGTHL, MALTptspp, MANGLYCptspp, MANptspp, MNLptspp, PGI, SBTptspp, SUCptspp, TREptspp
9266	-49.5361	EX_succ_e	10.8056	-10	0.0694611	4	30.0575	-13.0428	25.8624	-3.81046	8.00562	b2415, b3577, b3736, b3266	23DOGULNt4pp, 2DGLCptspp, ACGAptspp, ACMANAptspp, ACMUMptspp, ARBTptspp, ASCBptspp, ATPS4rpp, CELBpts, CHTBSptspp, DHAPT, FRUpts2pp, FRUptspp, GALTptspp, GAMptspp, GLCptspp, INDOLEt2pp, MALTptspp, MANGLYCptspp, MANptspp, MNLptspp, SBTptspp, SUCptspp, TREptspp, XYLUt2pp
9267	-49.5361	EX_succ_e	10.8056	-10	0.0694611	4	30.0575	-13.0428	25.8624	-3.81046	8.00562	b2415, b3732, b3265, b1249	2DGLCptspp, ACGAptspp, ACMANAptspp, ACMUMptspp, ARBTptspp, ASCBptspp, ATPS4rpp, CELBpts, CHTBSptspp, DHAPT, FRUpts2pp, FRUptspp, GALTptspp, GAMptspp, GLCptspp, INDOLEt2pp, MALTptspp, MANGLYCptspp, MANptspp, MNLptspp, SBTptspp, SUCptspp, TREptspp
9268	-49.5361	EX_succ_e	10.8056	-10	0.0694611	4	30.0575	-13.0428	25.8624	-3.81046	8.00562	b2415, b3738, b3265, b1801	2DGLCptspp, ACGAptspp, ACMANAptspp, ACMUMptspp, ARBTptspp, ASCBptspp, ATPS4rpp, CELBpts, CHTBSptspp, DHAPT, FRUpts2pp, FRUptspp, GALTptspp, GAMptspp, GLCptspp, INDOLEt2pp, MALTptspp, MANGLYCptspp, MANptspp, MNLptspp, SBTptspp, SUCptspp, TREptspp
9269	-49.5361	EX_succ_e	10.8056	-10	0.0694611	4	30.0575	-13.0428	25.8624	-3.81046	8.00562	b2415, b3736, b3469, b1485	2DGLCptspp, ACGAptspp, ACMANAptspp, ACMUMptspp, ARBTptspp, ASCBptspp, ATPS4rpp, CD2abcpp, CELBpts, CHTBSptspp, COBALT2abcpp, CU2abcpp, DHAPT, FRUpts2pp, FRUptspp, GALTptspp, GAMptspp, GLCptspp, HG2abcpp, MALTptspp, MANGLYCptspp, MANptspp, MNLptspp, NI2abcpp, SBTptspp, SUCptspp, TREptspp, ZN2abcpp
9270	-49.5361	EX_succ_e	10.8056	-10	0.0694611	4	30.0575	-13.0428	25.8624	-3.81046	8.00562	b2415, b1814, b3736, b1592	2DGLCptspp, ACGAptspp, ACMANAptspp, ACMUMptspp, ARBTptspp, ASCBptspp, ATPS4rpp, CELBpts, CHTBSptspp, CLtipp, DHAPT, FRUpts2pp, FRUptspp, GALTptspp, GAMptspp, GLCptspp, MALTptspp, MANGLYCptspp, MANptspp, MNLptspp, SBTptspp, SUCptspp, TREptspp
9271	-49.5361	EX_succ_e	10.8056	-10	0.0694611	4	30.0575	-13.0428	25.8624	-3.81046	8.00562	b2415, b3736, b3603, b1592	2DGLCptspp, ACGAptspp, ACMANAptspp, ACMUMptspp, ARBTptspp, ASCBptspp, ATPS4rpp, CELBpts, CHTBSptspp, CLtipp, DHAPT, FRUpts2pp, FRUptspp, GALTptspp, GAMptspp, GLCptspp, MALTptspp, MANGLYCptspp, MANptspp, MNLptspp, SBTptspp, SUCptspp, TREptspp
9272	-49.5361	EX_succ_e	10.8056	-10	0.0694611	4	30.0575	-13.0428	25.8624	-3.81046	8.00562	b2415, b3732, b1592, b1448	2DGLCptspp, ACGAptspp, ACMANAptspp, ACMUMptspp, ARBTptspp, ASCBptspp, ATPS4rpp, CELBpts, CHTBSptspp, CLtipp, DHAPT, FRUpts2pp, FRUptspp, GALTptspp, GAMptspp, GLCptspp, MALTptspp, MANGLYCptspp, MANptspp, METNA, MNLptspp, SBTptspp, SUCptspp, TREptspp
9273	-49.5361	EX_succ_e	10.8056	-10	0.0694611	4	30.0575	-13.0428	25.8624	-3.81046	8.00562	b2415, b3736, b1592, b0462	2DGLCptspp, ACGAptspp, ACMANAptspp, ACMUMptspp, ARBTptspp, ASCBptspp, ATPS4rpp, CELBpts, CHTBSptspp, CLtipp, DHAPT, FRUpts2pp, FRUptspp, GALTptspp, GAMptspp, GLCptspp, MALTptspp, MANGLYCptspp, MANptspp, MNLptspp, SBTptspp, SUCptspp, TREptspp
9274	-49.5361	EX_succ_e	10.8056	-10	0.0694611	4	30.0575	-13.0428	25.8624	-3.81046	8.00562	b2415, b1709, b3736, b1592	2DGLCptspp, ACGAptspp, ACMANAptspp, ACMUMptspp, ADOCBLabcpp, ARBTptspp, ASCBptspp, ATPS4rpp, CBIuabcpp, CBL1abcpp, CELBpts, CHTBSptspp, CLtipp, DHAPT, FRUpts2pp, FRUptspp, GALTptspp, GAMptspp, GLCptspp, MALTptspp, MANGLYCptspp, MANptspp, MNLptspp, SBTptspp, SUCptspp, TREptspp
9275	-49.5361	EX_succ_e	10.8056	-10	0.0694611	4	30.0575	-13.0428	25.8624	-3.81046	8.00562	b2415, b0589, b3736, b0150	2DGLCptspp, ACGAptspp, ACMANAptspp, ACMUMptspp, ARBTptspp, ASCBptspp, ATPS4rpp, CELBpts, CHTBSptspp, DHAPT, DHBSZ3FEabcpp, FE3HOXtonex, FECRMtonex, FEENTERabcpp, FEOXAMtonex, FRUpts2pp, FRUptspp, GALTptspp, GAMptspp, GLCptspp, MALTptspp, MANGLYCptspp, MANptspp, MNLptspp, SBTptspp, SUCptspp, TREptspp
9276	-49.5361	EX_succ_e	10.8056	-10	0.0694611	4	30.0575	-13.0428	25.8624	-3.81046	8.00562	b4390, b2415, b3736, b4288	2DGLCptspp, ACGAptspp, ACMANAptspp, ACMUMptspp, ARBTptspp, ASCBptspp, ATPS4rpp, CELBpts, CHTBSptspp, DHAPT, FE3DCITabcpp, FRUpts2pp, FRUptspp, GALTptspp, GAMptspp, GLCptspp, MALTptspp, MANGLYCptspp, MANptspp, MNLptspp, SBTptspp, SUCptspp, TREptspp
9277	-49.5361	EX_succ_e	10.8056	-10	0.0694611	4	30.0575	-13.0428	25.8624	-3.81046	8.00562	b2415, b3732, b4288, b1430	2DGLCptspp, ACGAptspp, ACMANAptspp, ACMUMptspp, ARBTptspp, ASCBptspp, ATPS4rpp, CELBpts, CHTBSptspp, DHAPT, FE3DCITabcpp, FRUpts2pp, FRUptspp, GALTptspp, GAMptspp, GLCptspp, MALTptspp, MANGLYCptspp, MANptspp, MNLptspp, SBTptspp, SUCptspp, TEO2M, TREptspp
9278	-49.5361	EX_succ_e	10.8056	-10	0.0694611	4	30.0575	-13.0428	25.8624	-3.81046	8.00562	b3588, b2415, b3732, b4288	2DGLCptspp, ACGAptspp, ACMANAptspp, ACMUMptspp, ARBTptspp, ASCBptspp, ATPS4rpp, CELBpts, CHTBSptspp, DHAPT, FE3DCITabcpp, FRUpts2pp, FRUptspp, GALTptspp, GAMptspp, GLCptspp, MALTptspp, MANGLYCptspp, MANptspp, MNLptspp, SBTptspp, SUCptspp, TREptspp
9279	-49.5361	EX_succ_e	10.8056	-10	0.0694611	4	30.0575	-13.0428	25.8624	-3.81046	8.00562	b2662, b2415, b3732, b4290	2DGLCptspp, ACGAptspp, ACMANAptspp, ACMUMptspp, ARBTptspp, ASCBptspp, ATPS4rpp, CELBpts, CHTBSptspp, DHAPT, FE3DCITabcpp, FRUpts2pp, FRUptspp, GALTptspp, GAMptspp, GLCptspp, MALTptspp, MANGLYCptspp, MANptspp, MNLptspp, SBTptspp, SUCptspp, TREptspp
9280	-49.5361	EX_succ_e	10.8056	-10	0.0694611	4	30.0575	-13.0428	25.8624	-3.81046	8.00562	b2415, b3732, b4290, b4230	2DGLCptspp, ACGAptspp, ACMANAptspp, ACMUMptspp, ARBTptspp, ASCBptspp, ATPS4rpp, CELBpts, CHTBSptspp, DHAPT, FE3DCITabcpp, FRUpts2pp, FRUptspp, GALTptspp, GAMptspp, GLCptspp, MALTptspp, MANGLYCptspp, MANptspp, MNLptspp, SBTptspp, SUCptspp, TREptspp
9281	-49.5361	EX_succ_e	10.8056	-10	0.0694611	4	30.0575	-13.0428	25.8624	-3.81046	8.00562	b2415, b1584, b3732, b4288	2DGLCptspp, ACGAptspp, ACMANAptspp, ACMUMptspp, ARBTptspp, ASCBptspp, ATPS4rpp, CELBpts, CHTBSptspp, DHAPT, FE3DCITabcpp, FRUpts2pp, FRUptspp, GALTptspp, GAMptspp, GLCptspp, MALTptspp, MANGLYCptspp, MANptspp, MNLptspp, SBTptspp, SPMDAT1, SPMDAT2, SUCptspp, TREptspp
9282	-49.5361	EX_succ_e	10.8056	-10	0.0694611	4	30.0575	-13.0428	25.8624	-3.81046	8.00562	b2415, b2483, b3732, b4291	2DGLCptspp, ACGAptspp, ACMANAptspp, ACMUMptspp, ARBTptspp, ASCBptspp, ATPS4rpp, CELBpts, CHTBSptspp, DHAPT, FE3DCITtonex, FRUpts2pp, FRUptspp, GALTptspp, GAMptspp, GLCptspp, MALTptspp, MANGLYCptspp, MANptspp, MNLptspp, SBTptspp, SUCptspp, TREptspp
9283	-49.5361	EX_succ_e	10.8056	-10	0.0694611	4	30.0575	-13.0428	25.8624	-3.81046	8.00562	b2415, b3738, b4289, b2147	2DGLCptspp, ACGAptspp, ACMANAptspp, ACMUMptspp, ARBTptspp, ASCBptspp, ATPS4rpp, CELBpts, CHTBSptspp, DHAPT, DURADx, FE3DCITabcpp, FRUpts2pp, FRUptspp, GALTptspp, GAMptspp, GLCptspp, MALTptspp, MANGLYCptspp, MANptspp, MNLptspp, SBTptspp, SUCptspp, TREptspp
9284	-49.5361	EX_succ_e	10.8056	-10	0.0694611	4	30.0575	-13.0428	25.8624	-3.81046	8.00562	b2415, b4138, b3736, b4289	2DGLCptspp, ACGAptspp, ACMANAptspp, ACMUMptspp, ARBTptspp, ASCBptspp, ATPS4rpp, CELBpts, CHTBSptspp, DHAPT, FE3DCITabcpp, FRUpts2pp, FRUptspp, GALTptspp, GAMptspp, GLCptspp, MALTptspp, MANGLYCptspp, MANptspp, MNLptspp, SBTptspp, SUCptspp, TREptspp
9285	-49.5361	EX_succ_e	10.8056	-10	0.0694611	4	30.0575	-13.0428	25.8624	-3.81046	8.00562	b2781, b2415, b3736, b4288	2DGLCptspp, ACGAptspp, ACMANAptspp, ACMUMptspp, ARBTptspp, ASCBptspp, ATPS4rpp, CELBpts, CHTBSptspp, DHAPT, FE3DCITabcpp, FRUpts2pp, FRUptspp, GALTptspp, GAMptspp, GLCptspp, MALTptspp, MANGLYCptspp, MANptspp, MNLptspp, SBTptspp, SUCptspp, TREptspp
9286	-49.5361	EX_succ_e	10.8056	-10	0.0694611	4	30.0575	-13.0428	25.8624	-3.81046	8.00562	b2415, b0331, b3736, b0729	2DGLCptspp, ACGAptspp, ACMANAptspp, ACMUMptspp, ARBTptspp, ASCBptspp, ATPS4rpp, CELBpts, CHTBSptspp, DHAPT, FRUpts2pp, FRUptspp, GALTptspp, GAMptspp, GLCptspp, MALTptspp, MANGLYCptspp, MANptspp, MCITL2, MNLptspp, SBTptspp, SUCOAS, SUCptspp, TREptspp
9287	-49.5361	EX_succ_e	10.8056	-10	0.0694611	4	30.0575	-13.0428	25.8624	-3.81046	8.00562	b2415, b3738, b2148, b3722	2DGLCptspp, ACGAptspp, ACMANAptspp, ACMUMptspp, ARBTptspp, ASCBptspp, ATPS4rpp, CELBpts, CHTBSptspp, DHAPT, FRUpts2pp, FRUptspp, GALTptspp, GAMptspp, GLCabcpp, GLCptspp, MALTptspp, MANGLYCptspp, MANptspp, MNLptspp, SBTptspp, SUCptspp, TREptspp
9288	-49.5361	EX_succ_e	10.8056	-10	0.0694611	4	30.0575	-13.0428	25.8624	-3.81046	8.00562	b2518, b2415, b3732, b2148	2DGLCptspp, ACGAptspp, ACMANAptspp, ACMUMptspp, ARBTptspp, ASCBptspp, ATPS4rpp, CELBpts, CHTBSptspp, DHAPT, FRUpts2pp, FRUptspp, GALTptspp, GAMptspp, GLCabcpp, GLCptspp, MALTptspp, MANGLYCptspp, MANptspp, MNLptspp, SBTptspp, SUCptspp, TREptspp
9289	-49.5361	EX_succ_e	10.8056	-10	0.0694611	4	30.0575	-13.0428	25.8624	-3.81046	8.00562	b2415, b2797, b3736, b2150	2DGLCptspp, ACGAptspp, ACMANAptspp, ACMUMptspp, ARBTptspp, ASCBptspp, ATPS4rpp, CELBpts, CHTBSptspp, DHAPT, FRUpts2pp, FRUptspp, GALTptspp, GAMptspp, GLCabcpp, GLCptspp, MALTptspp, MANGLYCptspp, MANptspp, MNLptspp, SBTptspp, SUCptspp, TREptspp
9290	-49.5361	EX_succ_e	10.8056	-10	0.0694611	4	30.0575	-13.0428	25.8624	-3.81046	8.00562	b3222, b2407, b2415, b3736	2DGLCptspp, ACGAptspp, ACMANAptspp, ACMUMptspp, AMANK, ARBTptspp, ASCBptspp, ATPS4rpp, CELBpts, CHTBSptspp, DHAPT, FRUpts2pp, FRUptspp, GALTptspp, GAMptspp, GLCptspp, MALTptspp, MANGLYCptspp, MANptspp, MNLptspp, PUNP7, SBTptspp, SUCptspp, TREptspp
9291	-49.5361	EX_succ_e	10.8056	-10	0.0694611	4	30.0575	-13.0428	25.8624	-3.81046	8.00562	b2407, b2415, b1767, b3732	2DGLCptspp, ACGAptspp, ACMANAptspp, ACMUMptspp, ARBTptspp, ASCBptspp, ATPS4rpp, CELBpts, CHTBSptspp, DHAPT, FRUpts2pp, FRUptspp, GALTptspp, GAMptspp, GLCptspp, MALTptspp, MANGLYCptspp, MANptspp, MNLptspp, PUNP7, SBTptspp, SUCptspp, TREptspp
9292	-49.5361	EX_succ_e	10.8056	-10	0.0694611	4	30.0575	-13.0428	25.8624	-3.81046	8.00562	b4232, b2407, b2415, b3732	2DGLCptspp, ACGAptspp, ACMANAptspp, ACMUMptspp, ARBTptspp, ASCBptspp, ATPS4rpp, CELBpts, CHTBSptspp, DHAPT, FRUpts2pp, FRUptspp, GALTptspp, GAMptspp, GLCptspp, MALTptspp, MANGLYCptspp, MANptspp, MNLptspp, PUNP7, SBTptspp, SUCptspp, TREptspp
9293	-49.5361	EX_succ_e	10.8056	-10	0.0694611	4	30.0575	-13.0428	25.8624	-3.81046	8.00562	b2407, b2415, b3738, b3032	2DGLCptspp, ACGAptspp, ACMANAptspp, ACMUMptspp, ARBTptspp, ASCBptspp, ATPS4rpp, CELBpts, CHTBSptspp, DHAPT, FRUpts2pp, FRUptspp, GALTptspp, GAMptspp, GLCptspp, MALTptspp, MANGLYCptspp, MANptspp, MNLptspp, PUNP7, SBTptspp, SUCptspp, TREptspp
9294	-49.5361	EX_succ_e	10.8056	-10	0.0694611	4	30.0575	-13.0428	25.8624	-3.81046	8.00562	b1095, b2415, b3736, b3253	2DGLCptspp, 3OAS181, ACGAptspp, ACMANAptspp, ACMUMptspp, ARBTptspp, ASCBptspp, ATPS4rpp, CELBpts, CHTBSptspp, DHAPT, FRUpts2pp, FRUptspp, GALTptspp, GAMptspp, GLCptspp, MALTptspp, MANGLYCptspp, MANptspp, MNLptspp, PCNO, SBTptspp, SUCptspp, TREptspp
9295	-49.5361	EX_succ_e	10.8056	-10	0.0694611	4	30.0575	-13.0428	25.8624	-3.81046	8.00562	b1095, b2415, b0273, b3736	2DGLCptspp, 3OAS181, ACGAptspp, ACMANAptspp, ACMUMptspp, ARBTptspp, ASCBptspp, ATPS4rpp, CELBpts, CHTBSptspp, DHAPT, FRUpts2pp, FRUptspp, GALTptspp, GAMptspp, GLCptspp, MALTptspp, MANGLYCptspp, MANptspp, MNLptspp, SBTptspp, SUCptspp, TREptspp
9296	-49.5361	EX_succ_e	10.8056	-10	0.0694611	4	30.0575	-13.0428	25.8624	-3.81046	8.00562	b2415, b3732, b2801, b4356	2DGLCptspp, ACGAptspp, ACMANAptspp, ACMUMptspp, ARBTptspp, ASCBptspp, ATPS4rpp, CELBpts, CHTBSptspp, DHAPT, FRUpts2pp, FRUptspp, FUCtpp, GALCTNLt2pp, GALTptspp, GAMptspp, GLCptspp, MALTptspp, MANGLYCptspp, MANptspp, MNLptspp, SBTptspp, SUCptspp, TREptspp
9297	-49.5361	EX_succ_e	10.8056	-10	0.0694611	4	30.0575	-13.0428	25.8624	-3.81046	8.00562	b2415, b3736, b2167, b2801	2DGLCptspp, ACGAptspp, ACMANAptspp, ACMUMptspp, ARBTptspp, ASCBptspp, ATPS4rpp, CELBpts, CHTBSptspp, DHAPT, FRUpts2pp, FRUptspp, FUCtpp, GALTptspp, GAMptspp, GLCptspp, MALTptspp, MANGLYCptspp, MANptspp, MNLptspp, SBTptspp, SUCptspp, TREptspp
9298	-49.5361	EX_succ_e	10.8056	-10	0.0694611	4	30.0575	-13.0428	25.8624	-3.81046	8.00562	b2415, b1199, b3732, b3909	2DGLCptspp, ACGAptspp, ACMANAptspp, ACMUMptspp, ARBTptspp, ASCBptspp, ATPS4rpp, CELBpts, CHTBSptspp, DDGLCNt2rpp, DHAPT, FRUpts2pp, FRUptspp, GALTptspp, GAMptspp, GLCptspp, MALTptspp, MANGLYCptspp, MANptspp, MNLptspp, SBTptspp, SUCptspp, TREptspp
9299	-49.5361	EX_succ_e	10.8056	-10	0.0694611	4	30.0575	-13.0428	25.8624	-3.81046	8.00562	b2415, b3738, b3909, b1441	2DGLCptspp, ACGAptspp, ACMANAptspp, ACMUMptspp, ARBTptspp, ASCBptspp, ATPS4rpp, CELBpts, CHTBSptspp, DDGLCNt2rpp, DHAPT, FRUpts2pp, FRUptspp, GALTptspp, GAMptspp, GLCptspp, MALTptspp, MANGLYCptspp, MANptspp, MNLptspp, SBTptspp, SUCptspp, TREptspp
9300	-49.5361	EX_succ_e	10.8056	-10	0.0694611	4	30.0575	-13.0428	25.8624	-3.81046	8.00562	b2415, b3738, b3737, b3909	2DGLCptspp, ACGAptspp, ACMANAptspp, ACMUMptspp, ARBTptspp, ASCBptspp, ATPS4rpp, CELBpts, CHTBSptspp, DDGLCNt2rpp, DHAPT, FRUpts2pp, FRUptspp, GALTptspp, GAMptspp, GLCptspp, MALTptspp, MANGLYCptspp, MANptspp, MNLptspp, SBTptspp, SUCptspp, TREptspp
9301	-49.5361	EX_succ_e	10.8056	-10	0.0694611	4	30.0575	-13.0428	25.8624	-3.81046	8.00562	b2415, b3736, b3909, b2047	2DGLCptspp, ACGAptspp, ACMANAptspp, ACMUMptspp, ARBTptspp, ASCBptspp, ATPS4rpp, CELBpts, CHTBSptspp, DDGLCNt2rpp, DHAPT, FRUpts2pp, FRUptspp, GALTptspp, GAMptspp, GLCptspp, MALTptspp, MANGLYCptspp, MANptspp, MNLptspp, SBTptspp, SUCptspp, TREptspp, UDPGPT
9302	-49.5361	EX_succ_e	10.8056	-10	0.0694611	4	30.0575	-13.0428	25.8624	-3.81046	8.00562	b2415, b4073, b0592, b3732	2DGLCptspp, ACGAptspp, ACMANAptspp, ACMUMptspp, ARBTptspp, ASCBptspp, ATPS4rpp, CELBpts, CHTBSptspp, DHAPT, DHBSZ3FEabcpp, FEENTERabcpp, FRUpts2pp, FRUptspp, GALTptspp, GAMptspp, GLCptspp, MALTptspp, MANGLYCptspp, MANptspp, MNLptspp, NTRIR3pp, NTRIR4pp, SBTptspp, SUCptspp, TREptspp
9303	-49.5361	EX_succ_e	10.8056	-10	0.0694611	4	30.0575	-13.0428	25.8624	-3.81046	8.00562	b2415, b4070, b3732, b0584	2DGLCptspp, ACGAptspp, ACMANAptspp, ACMUMptspp, ARBTptspp, ASCBptspp, ATPS4rpp, CELBpts, CHTBSptspp, DHAPT, FEENTERtonex, FRUpts2pp, FRUptspp, GALTptspp, GAMptspp, GLCptspp, MALTptspp, MANGLYCptspp, MANptspp, MNLptspp, NTRIR3pp, NTRIR4pp, SBTptspp, SUCptspp, TREptspp
9304	-49.5361	EX_succ_e	10.8056	-10	0.0694611	4	30.0575	-13.0428	25.8624	-3.81046	8.00562	b2415, b3736, b3653, b0269	2DGLCptspp, ACGAptspp, ACMANAptspp, ACMUMptspp, ARBTptspp, ASCBptspp, ATPS4rpp, CELBpts, CHTBSptspp, DHAPT, FRUpts2pp, FRUptspp, GALTptspp, GAMptspp, GLCptspp, GLUt4pp, MALTptspp, MANGLYCptspp, MANptspp, MNLptspp, SBTptspp, SUCptspp, TREptspp
9305	-49.5361	EX_succ_e	10.8056	-10	0.0694611	4	30.0575	-13.0428	25.8624	-3.81046	8.00562	b2415, b3738, b3005, b3881	2DGLCptspp, 6D6SPA, ACGAptspp, ACMANAptspp, ACMUMptspp, ADOCBLtonex, ARBTptspp, ASCBptspp, ATPS4rpp, CBItonex, CBL1tonex, CELBpts, CHTBSptspp, CPGNtonex, DHAPT, FE3DCITtonex, FE3DHBZStonex, FE3HOXtonex, FECRMtonex, FEENTERtonex, FEOXAMtonex, FRUpts2pp, FRUptspp, GALTptspp, GAMptspp, GLCptspp, MALTptspp, MANGLYCptspp, MANptspp, MNLptspp, SBTptspp, SUCptspp, TREptspp
9306	-49.5361	EX_succ_e	10.8056	-10	0.0694611	4	30.0575	-13.0428	25.8624	-3.81046	8.00562	b1759, b2415, b3736, b3005	2DGLCptspp, ACGAptspp, ACMANAptspp, ACMUMptspp, ADOCBLtonex, ARBTptspp, ASCBptspp, ATPS4rpp, CBItonex, CBL1tonex, CELBpts, CHTBSptspp, CPGNtonex, DHAPT, FE3DCITtonex, FE3DHBZStonex, FE3HOXtonex, FECRMtonex, FEENTERtonex, FEOXAMtonex, FRUpts2pp, FRUptspp, GALTptspp, GAMptspp, GLCptspp, MALTptspp, MANGLYCptspp, MANptspp, MNLptspp, SBTptspp, SUCptspp, TREptspp
9307	-49.5361	EX_succ_e	10.8056	-10	0.0694611	4	30.0575	-13.0428	25.8624	-3.81046	8.00562	b2415, b1858, b3732, b2794	2DGLCptspp, ACGAptspp, ACMANAptspp, ACMUMptspp, ARBTptspp, ASCBptspp, ATPS4rpp, CDGR, CELBpts, CHTBSptspp, DHAPT, FRUpts2pp, FRUptspp, GALTptspp, GAMptspp, GLCptspp, MALTptspp, MANGLYCptspp, MANptspp, MNLptspp, SBTptspp, SUCptspp, TREptspp, ZNabcpp
9308	-49.5361	EX_succ_e	10.8056	-10	0.0694611	4	30.0575	-13.0428	25.8624	-3.81046	8.00562	b4053, b2415, b1857, b3738	2DGLCptspp, ACGAptspp, ACMANAptspp, ACMUMptspp, ARBTptspp, ASCBptspp, ATPS4rpp, CELBpts, CHTBSptspp, DHAPT, FRUpts2pp, FRUptspp, GALTptspp, GAMptspp, GLCptspp, MALTptspp, MANGLYCptspp, MANptspp, MNLptspp, SBTptspp, SUCptspp, TREptspp, ZNabcpp
9309	-49.5361	EX_succ_e	10.8056	-10	0.0694611	4	30.0575	-13.0428	25.8624	-3.81046	8.00562	b1241, b2415, b1859, b3738	2DGLCptspp, ACGAptspp, ACMANAptspp, ACMUMptspp, ARBTptspp, ASCBptspp, ATPS4rpp, CELBpts, CHTBSptspp, DHAPT, FRUpts2pp, FRUptspp, GALTptspp, GAMptspp, GLCptspp, MALTptspp, MANGLYCptspp, MANptspp, MNLptspp, SBTptspp, SUCptspp, TREptspp, ZNabcpp
9310	-49.5361	EX_succ_e	10.8056	-10	0.0694611	4	30.0575	-13.0428	25.8624	-3.81046	8.00562	b2415, b0123, b1857, b3738	2DGLCptspp, ACGAptspp, ACMANAptspp, ACMUMptspp, ARBTptspp, ASCBptspp, ATPS4rpp, CELBpts, CHTBSptspp, CU1Opp, DHAPT, FRUpts2pp, FRUptspp, GALTptspp, GAMptspp, GLCptspp, MALTptspp, MANGLYCptspp, MANptspp, MNLptspp, SBTptspp, SUCptspp, TREptspp, ZNabcpp
9311	-49.5361	EX_succ_e	10.8056	-10	0.0694611	4	30.0575	-13.0428	25.8624	-3.81046	8.00562	b3693, b2415, b1858, b3732	2DGLCptspp, ACGAptspp, ACMANAptspp, ACMUMptspp, ARBTptspp, ASCBptspp, ATPS4rpp, CELBpts, CHTBSptspp, DDGALK, DHAPT, FRUpts2pp, FRUptspp, GALTptspp, GAMptspp, GLCptspp, MALTptspp, MANGLYCptspp, MANptspp, MNLptspp, SBTptspp, SUCptspp, TREptspp, ZNabcpp
9312	-49.5361	EX_succ_e	10.8056	-10	0.0694611	4	30.0575	-13.0428	25.8624	-3.81046	8.00562	b2415, b1858, b3736, b2047	2DGLCptspp, ACGAptspp, ACMANAptspp, ACMUMptspp, ARBTptspp, ASCBptspp, ATPS4rpp, CELBpts, CHTBSptspp, DHAPT, FRUpts2pp, FRUptspp, GALTptspp, GAMptspp, GLCptspp, MALTptspp, MANGLYCptspp, MANptspp, MNLptspp, SBTptspp, SUCptspp, TREptspp, UDPGPT, ZNabcpp
9313	-49.5361	EX_succ_e	10.8056	-10	0.0694611	4	30.0575	-13.0428	25.8624	-3.81046	8.00562	b2415, b1859, b3736, b3856	2DGLCptspp, ACGAptspp, ACMANAptspp, ACMUMptspp, ARBTptspp, ASCBptspp, ATPS4rpp, CELBpts, CHTBSptspp, DHAPT, FRUpts2pp, FRUptspp, GALTptspp, GAMptspp, GLCptspp, MALTptspp, MANGLYCptspp, MANptspp, MNLptspp, SBTptspp, SUCptspp, TREptspp, ZNabcpp
9314	-49.5361	EX_succ_e	10.8056	-10	0.0694611	4	30.0575	-13.0428	25.8624	-3.81046	8.00562	b2415, b1859, b3736, b1870	2DGLCptspp, ACGAptspp, ACMANAptspp, ACMUMptspp, ARBTptspp, ASCBptspp, ATPS4rpp, CELBpts, CHTBSptspp, CXSAMS, DHAPT, FRUpts2pp, FRUptspp, GALTptspp, GAMptspp, GLCptspp, MALTptspp, MANGLYCptspp, MANptspp, MNLptspp, SBTptspp, SUCptspp, TREptspp, ZNabcpp
9315	-49.5361	EX_succ_e	10.8056	-10	0.0694611	4	30.0575	-13.0428	25.8624	-3.81046	8.00562	b2415, b2424, b1857, b3732	2DGLCptspp, ACGAptspp, ACMANAptspp, ACMUMptspp, ARBTptspp, ASCBptspp, ATPS4rpp, CELBpts, CHTBSptspp, DHAPT, FRUpts2pp, FRUptspp, GALTptspp, GAMptspp, GLCptspp, MALTptspp, MANGLYCptspp, MANptspp, MNLptspp, SBTptspp, SELabcpp, SLNTabcpp, SUCptspp, TREptspp, TSULabcpp, ZNabcpp
9316	-49.5361	EX_succ_e	10.8056	-10	0.0694611	4	30.0575	-13.0428	25.8624	-3.81046	8.00562	b0036, b2415, b3137, b3736	2DGLCptspp, ACGAptspp, ACMANAptspp, ACMUMptspp, ARBTptspp, ASCBptspp, ATPS4rpp, CELBpts, CHTBSptspp, CRNCAR, CRNCDH, DHAPT, FRUpts2pp, FRUptspp, GALTptspp, GAMptspp, GLCptspp, MALTptspp, MANGLYCptspp, MANptspp, MNLptspp, SBTptspp, SUCptspp, TREptspp
9317	-49.5361	EX_succ_e	10.8056	-10	0.0694611	4	30.0575	-13.0428	25.8624	-3.81046	8.00562	b0036, b2415, b3568, b3732	2DGLCptspp, ACGAptspp, ACMANAptspp, ACMUMptspp, ARBTptspp, ASCBptspp, ATPS4rpp, CELBpts, CHTBSptspp, CRNCAR, CRNCDH, DHAPT, FRUpts2pp, FRUptspp, GALTptspp, GAMptspp, GLCptspp, MALTptspp, MANGLYCptspp, MANptspp, MNLptspp, SBTptspp, SUCptspp, TREptspp, XYLabcpp
9318	-49.5361	EX_succ_e	10.8056	-10	0.0694611	4	30.0575	-13.0428	25.8624	-3.81046	8.00562	b0036, b2415, b3736, b2765	2DGLCptspp, ACGAptspp, ACMANAptspp, ACMUMptspp, ARBTptspp, ASCBptspp, ATPS4rpp, CELBpts, CHTBSptspp, CPH4S, CRNCAR, CRNCDH, DHAPT, FRUpts2pp, FRUptspp, GALTptspp, GAMptspp, GLCptspp, MALTptspp, MANGLYCptspp, MANptspp, MNLptspp, SBTptspp, SUCptspp, TREptspp
9319	-49.5361	EX_succ_e	10.8056	-10	0.0694611	4	30.0575	-13.0428	25.8624	-3.81046	8.00562	b2415, b3736, b0019, b4167	2DGLCptspp, ACGAptspp, ACMANAptspp, ACMUMptspp, ARBTptspp, ASCBptspp, ATPS4rpp, CELBpts, CHTBSptspp, DHAPT, FRUpts2pp, FRUptspp, GALTptspp, GAMptspp, GLCptspp, MALTptspp, MANGLYCptspp, MANptspp, MNLptspp, NADHXD, NADHXE, NADPHXD, NADPHXE, NAt3_2pp, SBTptspp, SUCptspp, TREptspp
9320	-49.5361	EX_succ_e	10.8056	-10	0.0694611	4	30.0575	-13.0428	25.8624	-3.81046	8.00562	b2415, b0333, b3736, b1300	2DGLCptspp, 3HPADHi, ACGAptspp, ACMANAptspp, ACMUMptspp, ARBTptspp, ASCBptspp, ATPS4rpp, CELBpts, CHTBSptspp, DHAPT, FRUpts2pp, FRUptspp, GALTptspp, GAMptspp, GGGABADr, GLCptspp, MALTptspp, MANGLYCptspp, MANptspp, MCITS, MNLptspp, SBTptspp, SUCptspp, TREptspp
9321	-49.5361	EX_succ_e	10.8056	-10	0.0694611	4	30.0575	-13.0428	25.8624	-3.81046	8.00562	b2415, b3732, b1298, b0118	2DGLCptspp, ACGAptspp, ACMANAptspp, ACMUMptspp, ARBTptspp, ASCBptspp, ATPS4rpp, CELBpts, CHTBSptspp, DHAPT, FRUpts2pp, FRUptspp, GALTptspp, GAMptspp, GGGABAH, GLCptspp, MALTptspp, MANGLYCptspp, MANptspp, MICITDr, MNLptspp, SBTptspp, SUCptspp, TREptspp
9322	-49.5361	EX_succ_e	10.8056	-10	0.0694611	4	30.0575	-13.0428	25.8624	-3.81046	8.00562	b2415, b0615, b3732, b2027	2DGLCptspp, ACGAptspp, ACMANAptspp, ACMUMptspp, ARBTptspp, ASCBptspp, ATPS4rpp, CELBpts, CHTBSptspp, CITL, DHAPT, FRUpts2pp, FRUptspp, GALTptspp, GAMptspp, GLCptspp, MALTptspp, MANGLYCptspp, MANptspp, MNLptspp, O16AP1pp, O16AP2pp, O16AP3pp, SBTptspp, SUCptspp, TREptspp
9323	-49.5361	EX_succ_e	10.8056	-10	0.0694611	4	30.0575	-13.0428	25.8624	-3.81046	8.00562	b0207, b2415, b0614, b3732	2DGLCptspp, ACGAptspp, ACMANAptspp, ACMUMptspp, ARBTptspp, ASCBptspp, ATPS4rpp, CELBpts, CHTBSptspp, CITL, DHAPT, FRUpts2pp, FRUptspp, GALTptspp, GAMptspp, GLCptspp, MALTptspp, MANGLYCptspp, MANptspp, MNLptspp, SBTptspp, SUCptspp, TREptspp
9324	-49.5361	EX_succ_e	10.8056	-10	0.0694611	4	30.0575	-13.0428	25.8624	-3.81046	8.00562	b2415, b0615, b3566, b3736	2DGLCptspp, ACGAptspp, ACMANAptspp, ACMUMptspp, ARBTptspp, ASCBptspp, ATPS4rpp, CELBpts, CHTBSptspp, CITL, DHAPT, FRUpts2pp, FRUptspp, GALTptspp, GAMptspp, GLCptspp, MALTptspp, MANGLYCptspp, MANptspp, MNLptspp, SBTptspp, SUCptspp, TREptspp, XYLabcpp
9325	-49.5361	EX_succ_e	10.8056	-10	0.0694611	4	30.0575	-13.0428	25.8624	-3.81046	8.00562	b2415, b0617, b3738, b2033	2DGLCptspp, ACGAptspp, ACMANAptspp, ACMUMptspp, ARBTptspp, ASCBptspp, ATPS4rpp, CELBpts, CHTBSptspp, CITL, DHAPT, FRUpts2pp, FRUptspp, GALTptspp, GAMptspp, GLCptspp, MALTptspp, MANGLYCptspp, MANptspp, MNLptspp, O16AT, SBTptspp, SUCptspp, TREptspp
9326	-49.5361	EX_succ_e	10.8056	-10	0.0694611	4	30.0575	-13.0428	25.8624	-3.81046	8.00562	b2415, b0153, b3738, b0118	2DGLCptspp, ACGAptspp, ACMANAptspp, ACMUMptspp, ARBTNabcpp, ARBTptspp, ASCBptspp, ATPS4rpp, CELBpts, CHTBSptspp, CPGNabcpp, DHAPT, FE3HOXabcpp, FECRMabcpp, FEOXAMabcpp, FRUpts2pp, FRUptspp, GALTptspp, GAMptspp, GLCptspp, MALTptspp, MANGLYCptspp, MANptspp, MICITDr, MNLptspp, SBTptspp, SUCptspp, TREptspp
9327	-49.5361	EX_succ_e	10.8056	-10	0.0694611	4	30.0575	-13.0428	25.8624	-3.81046	8.00562	b2415, b0575, b3736, b2889	2DGLCptspp, ACGAptspp, ACMANAptspp, ACMUMptspp, AGt3, ARBTptspp, ASCBptspp, ATPS4rpp, CELBpts, CHTBSptspp, CUt3, DHAPT, FRUpts2pp, FRUptspp, GALTptspp, GAMptspp, GLCptspp, IPDDI, MALTptspp, MANGLYCptspp, MANptspp, MNLptspp, SBTptspp, SUCptspp, TREptspp
9328	-49.5361	EX_succ_e	10.8056	-10	0.0694611	4	30.0575	-13.0428	25.8624	-3.81046	8.00562	b2415, b3619, b3732, b1710	2DGLCptspp, ACGAptspp, ACMANAptspp, ACMUMptspp, AGMHE, ARBTptspp, ASCBptspp, ATPS4rpp, CELBpts, CHTBSptspp, DHAPT, FRUpts2pp, FRUptspp, GALTptspp, GAMptspp, GLCptspp, GTHPi, MALTptspp, MANGLYCptspp, MANptspp, MNLptspp, SBTptspp, SUCptspp, TREptspp
9329	-49.5361	EX_succ_e	10.8056	-10	0.0694611	4	30.0575	-13.0428	25.8624	-3.81046	8.00562	b2415, b3738, b2710, b3924	2DGLCptspp, ACGAptspp, ACMANAptspp, ACMUMptspp, ARBTptspp, ASCBptspp, ATPS4rpp, CELBpts, CHTBSptspp, DHAPT, FLDR2, FRUpts2pp, FRUptspp, GALTptspp, GAMptspp, GLCptspp, MALTptspp, MANGLYCptspp, MANptspp, MNLptspp, NHFRBO, SBTptspp, SUCptspp, TREptspp
9330	-49.5361	EX_succ_e	10.8056	-10	0.0694611	4	30.0575	-13.0428	25.8624	-3.81046	8.00562	b2415, b3736, b2578, b3924	2DGLCptspp, ACGAptspp, ACMANAptspp, ACMUMptspp, ARBTptspp, ASCBptspp, ATPS4rpp, CELBpts, CHTBSptspp, DHAPT, FLDR2, FRUpts2pp, FRUptspp, GALTptspp, GAMptspp, GLCptspp, MALTptspp, MANGLYCptspp, MANptspp, MNLptspp, SBTptspp, SUCptspp, TREptspp
9331	-49.5361	EX_succ_e	10.8056	-10	0.0694611	4	30.0575	-13.0428	25.8624	-3.81046	8.00562	b2415, b3736, b2914, b3924	2DGLCptspp, ACGAptspp, ACMANAptspp, ACMUMptspp, ARBTptspp, ASCBptspp, ATPS4rpp, CELBpts, CHTBSptspp, DHAPT, FLDR2, FRUpts2pp, FRUptspp, GALTptspp, GAMptspp, GLCptspp, MALTptspp, MANGLYCptspp, MANptspp, MNLptspp, SBTptspp, SUCptspp, TREptspp
9332	-49.5361	EX_succ_e	10.8056	-10	0.0694611	4	30.0575	-13.0428	25.8624	-3.81046	8.00562	b2415, b3806, b3732, b4460	2DGLCptspp, ACGAptspp, ACMANAptspp, ACMUMptspp, ADNCYC, ARBTptspp, ARBabcpp, ASCBptspp, ATPS4rpp, CELBpts, CHTBSptspp, DHAPT, FRUpts2pp, FRUptspp, GALTptspp, GAMptspp, GLCptspp, MALTptspp, MANGLYCptspp, MANptspp, MNLptspp, SBTptspp, SUCptspp, TREptspp
9333	-49.5361	EX_succ_e	10.8056	-10	0.0694611	4	30.0575	-13.0428	25.8624	-3.81046	8.00562	b2415, b1814, b3738, b1771	2DGLCptspp, ACGAptspp, ACMANAptspp, ACMUMptspp, ALR2x, ARBTptspp, ASCBptspp, ATPS4rpp, CELBpts, CHTBSptspp, DHAPT, FRUpts2pp, FRUptspp, GALTptspp, GAMptspp, GLCptspp, MALTptspp, MANGLYCptspp, MANptspp, MNLptspp, SBTptspp, SUCptspp, TREptspp
9334	-49.5361	EX_succ_e	10.8056	-10	0.0694611	4	30.0575	-13.0428	25.8624	-3.81046	8.00562	b2415, b1466, b3738, b1771	2DGLCptspp, ACGAptspp, ACMANAptspp, ACMUMptspp, ALR2x, ARBTptspp, ASCBptspp, ATPS4rpp, CELBpts, CHTBSptspp, DHAPT, FRUpts2pp, FRUptspp, GALTptspp, GAMptspp, GLCptspp, MALTptspp, MANGLYCptspp, MANptspp, MNLptspp, SBTptspp, SUCptspp, TREptspp
9335	-49.5361	EX_succ_e	10.8056	-10	0.0694611	4	30.0575	-13.0428	25.8624	-3.81046	8.00562	b4053, b2415, b3738, b1771	2DGLCptspp, ACGAptspp, ACMANAptspp, ACMUMptspp, ALR2x, ARBTptspp, ASCBptspp, ATPS4rpp, CELBpts, CHTBSptspp, DHAPT, FRUpts2pp, FRUptspp, GALTptspp, GAMptspp, GLCptspp, MALTptspp, MANGLYCptspp, MANptspp, MNLptspp, SBTptspp, SUCptspp, TREptspp
9336	-49.5361	EX_succ_e	10.8056	-10	0.0694611	4	30.0575	-13.0428	25.8624	-3.81046	8.00562	b2415, b2203, b3738, b1771	2DGLCptspp, ACGAptspp, ACMANAptspp, ACMUMptspp, ALR2x, ARBTptspp, ASCBptspp, ATPS4rpp, CELBpts, CHTBSptspp, DHAPT, FRUpts2pp, FRUptspp, GALTptspp, GAMptspp, GLCptspp, MALTptspp, MANGLYCptspp, MANptspp, MNLptspp, NO3R1bpp, NO3R2bpp, SBTptspp, SUCptspp, TREptspp
9337	-49.5361	EX_succ_e	10.8056	-10	0.0694611	4	30.0575	-13.0428	25.8624	-3.81046	8.00562	b2415, b0110, b3732, b2149	2DGLCptspp, ACGAptspp, ACMANAptspp, ACMUMptspp, AGM3PA, AGM4PA, AM3PA, AM4PA, ARBTptspp, ASCBptspp, ATPS4rpp, CELBpts, CHTBSptspp, DHAPT, FRUpts2pp, FRUptspp, GALTptspp, GAMptspp, GLCabcpp, GLCptspp, MALTptspp, MANGLYCptspp, MANptspp, MNLptspp, SBTptspp, SUCptspp, TREptspp
9338	-49.5361	EX_succ_e	10.8056	-10	0.0694611	4	30.0575	-13.0428	25.8624	-3.81046	8.00562	b3417, b2415, b3732, b3653	2DGLCptspp, ACGAptspp, ACMANAptspp, ACMUMptspp, ARBTptspp, ASCBptspp, ATPS4rpp, CELBpts, CHTBSptspp, DHAPT, FRUpts2pp, FRUptspp, GALTptspp, GAMptspp, GLCptspp, GLUt4pp, MALTptspp, MANGLYCptspp, MANptspp, MLTP1, MLTP2, MLTP3, MNLptspp, SBTptspp, SUCptspp, TREptspp
9339	-49.5361	EX_succ_e	10.8056	-10	0.0694611	4	30.0575	-13.0428	25.8624	-3.81046	8.00562	b2243, b2415, b3732, b2957	2DGLCptspp, ACGAptspp, ACMANAptspp, ACMUMptspp, ARBTptspp, ASCBptspp, ASNNpp, ATPS4rpp, CELBpts, CHTBSptspp, DHAPT, FRUpts2pp, FRUptspp, G3PD6, G3PD7, GALTptspp, GAMptspp, GLCptspp, GLUNpp, MALTptspp, MANGLYCptspp, MANptspp, MNLptspp, SBTptspp, SUCptspp, TREptspp
9340	-49.5361	EX_succ_e	10.8056	-10	0.0694611	4	30.0575	-13.0428	25.8624	-3.81046	8.00562	b2415, b3736, b3622, b0508	2DGLCptspp, ACGAptspp, ACMANAptspp, ACMUMptspp, ARBTptspp, ASCBptspp, ATPS4rpp, CELBpts, CHTBSptspp, DHAPT, ECA4OALpp, FRUpts2pp, FRUptspp, GALTptspp, GAMptspp, GLCptspp, HPYRI, MALTptspp, MANGLYCptspp, MANptspp, MNLptspp, O16A4Lpp, SBTptspp, SUCptspp, TREptspp
9341	-49.5361	EX_succ_e	10.8056	-10	0.0694611	4	30.0575	-13.0428	25.8624	-3.81046	8.00562	b2415, b2265, b3736, b0009	2DGLCptspp, ACGAptspp, ACMANAptspp, ACMUMptspp, ARBTptspp, ASCBptspp, ATPS4rpp, CELBpts, CHTBSptspp, DHAPT, FRUpts2pp, FRUptspp, GALTptspp, GAMptspp, GLCptspp, ICHORS_copy2, MALTptspp, MANGLYCptspp, MANptspp, MNLptspp, MPTAT, SBTptspp, SUCptspp, TREptspp
9342	-49.5361	EX_succ_e	10.8056	-10	0.0694611	4	30.0575	-13.0428	25.8624	-3.81046	8.00562	b0477, b2688, b2415, b3738	2DGLCptspp, ACGAptspp, ACMANAptspp, ACMUMptspp, ARBTptspp, ASCBptspp, ATPS4rpp, CELBpts, CHTBSptspp, DHAPT, FRUpts2pp, FRUptspp, GALTptspp, GAMptspp, GLCptspp, GLUCYS, GSNK, INSK, MALTptspp, MANGLYCptspp, MANptspp, MNLptspp, SBTptspp, SUCptspp, TREptspp
9343	-49.5361	EX_succ_e	10.8056	-10	0.0694611	4	30.0575	-13.0428	25.8624	-3.81046	8.00562	b1694, b2415, b3736, b2200	2DGLCptspp, ACGAptspp, ACMANAptspp, ACMUMptspp, ARBTptspp, ASCBptspp, ATPS4rpp, CELBpts, CHTBSptspp, DHAPT, FRUpts2pp, FRUptspp, GALTptspp, GAMptspp, GLCptspp, MALTptspp, MANGLYCptspp, MANptspp, MNLptspp, PHEMEabcpp, SBTptspp, SUCptspp, TREptspp
9344	-49.5361	EX_succ_e	10.8056	-10	0.0694611	4	30.0575	-13.0428	25.8624	-3.81046	8.00562	b2415, b2817, b3732, b2197	2DGLCptspp, ACGAptspp, ACMANAptspp, ACMUMptspp, ARBTptspp, ASCBptspp, ATPS4rpp, CELBpts, CHTBSptspp, DHAPT, FRUpts2pp, FRUptspp, GALTptspp, GAMptspp, GLCptspp, MALTptspp, MANGLYCptspp, MANptspp, MNLptspp, PHEMEabcpp, SBTptspp, SUCptspp, TREptspp
9345	-49.5361	EX_succ_e	10.8056	-10	0.0694611	4	30.0575	-13.0428	25.8624	-3.81046	8.00562	b2415, b1224, b3736, b2199	2DGLCptspp, ACGAptspp, ACMANAptspp, ACMUMptspp, ARBTptspp, ASCBptspp, ATPS4rpp, CELBpts, CHTBSptspp, DHAPT, FRUpts2pp, FRUptspp, GALTptspp, GAMptspp, GLCptspp, MALTptspp, MANGLYCptspp, MANptspp, MNLptspp, PHEMEabcpp, SBTptspp, SUCptspp, TREptspp
9346	-49.5361	EX_succ_e	10.8056	-10	0.0694611	4	30.0575	-13.0428	25.8624	-3.81046	8.00562	b0340, b2415, b3736, b2200	2DGLCptspp, ACGAptspp, ACMANAptspp, ACMUMptspp, ARBTptspp, ASCBptspp, ATPS4rpp, CELBpts, CHTBSptspp, CYNTAH, DHAPT, FRUpts2pp, FRUptspp, GALTptspp, GAMptspp, GLCptspp, MALTptspp, MANGLYCptspp, MANptspp, MNLptspp, PHEMEabcpp, SBTptspp, SUCptspp, TREptspp
9347	-49.5361	EX_succ_e	10.8056	-10	0.0694611	4	30.0575	-13.0428	25.8624	-3.81046	8.00562	b2415, b3738, b2199, b1484	2DGLCptspp, ACGAptspp, ACMANAptspp, ACMUMptspp, ARBTptspp, ASCBptspp, ATPS4rpp, CELBpts, CHTBSptspp, DHAPT, FRUpts2pp, FRUptspp, GALTptspp, GAMptspp, GLCptspp, MALTptspp, MANGLYCptspp, MANptspp, MNLptspp, PHEMEabcpp, SBTptspp, SUCptspp, TREptspp
9348	-49.5361	EX_succ_e	10.8056	-10	0.0694611	4	30.0575	-13.0428	25.8624	-3.81046	8.00562	b2415, b2903, b3732, b2264	2DGLCptspp, ACGAptspp, ACMANAptspp, ACMUMptspp, ARBTptspp, ASCBptspp, ATPS4rpp, CELBpts, CHTBSptspp, DHAPT, FRUpts2pp, FRUptspp, GALTptspp, GAMptspp, GLCptspp, GLYCL, MALTptspp, MANGLYCptspp, MANptspp, MNLptspp, SBTptspp, SEPHCHCS, SUCptspp, TREptspp
9349	-49.5361	EX_succ_e	10.8056	-10	0.0694611	4	30.0575	-13.0428	25.8624	-3.81046	8.00562	b2415, b0104, b3736, b0356	2DGLCptspp, ACGAptspp, ACMANAptspp, ACMUMptspp, ARBTptspp, ASCBptspp, ATPS4rpp, CELBpts, CHTBSptspp, DHAPT, FALDH2, FRUpts2pp, FRUptspp, GALTptspp, GAMptspp, GLCptspp, GMPR, MALTptspp, MANGLYCptspp, MANptspp, MNLptspp, SBTptspp, SUCptspp, TREptspp
9350	-49.5361	EX_succ_e	10.8056	-10	0.0694611	4	30.0575	-13.0428	25.8624	-3.81046	8.00562	b2415, b4139, b3736, b1385	2DGLCptspp, ACGAptspp, ACMANAptspp, ACMUMptspp, ALDD19xr, ARBTptspp, ASCBptspp, ASPT, ATPS4rpp, CELBpts, CHTBSptspp, DHAPT, FRUpts2pp, FRUptspp, GALTptspp, GAMptspp, GLCptspp, MALTptspp, MANGLYCptspp, MANptspp, MNLptspp, SBTptspp, SUCptspp, TREptspp
9351	-49.5361	EX_succ_e	10.8056	-10	0.0694611	4	30.0575	-13.0428	25.8624	-3.81046	8.00562	b2415, b3736, b3650, b1022	2DGLCptspp, ACGAptspp, ACMANAptspp, ACMUMptspp, ARBTptspp, ASCBptspp, ATPS4rpp, CELBpts, CHTBSptspp, DHAPT, FRUpts2pp, FRUptspp, GALTptspp, GAMptspp, GDPTPDP, GLCptspp, MALTptspp, MANGLYCptspp, MANptspp, MNLptspp, PPGPPDP, PUACGAMS, PUACGAMtr, SBTptspp, SUCptspp, TREptspp
9352	-49.5361	EX_succ_e	10.8056	-10	0.0694611	4	30.0575	-13.0428	25.8624	-3.81046	8.00562	b1850, b2415, b3736, b2256	2DGLCptspp, ACGAptspp, ACMANAptspp, ACMUMptspp, ARBTptspp, ASCBptspp, ATPS4rpp, CELBpts, CHTBSptspp, DHAPT, EDA, FRUpts2pp, FRUptspp, GALTptspp, GAMptspp, GLCptspp, MALTptspp, MANGLYCptspp, MANptspp, MNLptspp, OAADC, SBTptspp, SUCptspp, TREptspp, UPLA4FNF
9353	-49.5361	EX_succ_e	10.8056	-10	0.0694611	4	30.0575	-13.0428	25.8624	-3.81046	8.00562	b1850, b2415, b3736, b3748	2DGLCptspp, ACGAptspp, ACMANAptspp, ACMUMptspp, ARBTptspp, ASCBptspp, ATPS4rpp, CELBpts, CHTBSptspp, DHAPT, EDA, FRUpts2pp, FRUptspp, GALTptspp, GAMptspp, GLCptspp, MALTptspp, MANGLYCptspp, MANptspp, MNLptspp, OAADC, SBTptspp, SUCptspp, TREptspp
9354	-49.5361	EX_succ_e	10.8056	-10	0.0694611	4	30.0575	-13.0428	25.8624	-3.81046	8.00562	b1850, b2415, b3732, b0709	2DGLCptspp, ACGAptspp, ACMANAptspp, ACMUMptspp, ARBTptspp, ASCBptspp, ATPS4rpp, CELBpts, CHTBSptspp, DHAPT, EDA, FRUpts2pp, FRUptspp, GALTptspp, GAMptspp, GLCptspp, MALTptspp, MANGLYCptspp, MANptspp, MNLptspp, OAADC, SBTptspp, SUCptspp, TREptspp
9355	-49.5361	EX_succ_e	10.8056	-10	0.0694611	4	30.0575	-13.0428	25.8624	-3.81046	8.00562	b2415, b0237, b3738, b2868	2DGLCptspp, ACGAptspp, ACMANAptspp, ACMUMptspp, ARBTptspp, ASCBptspp, ATPS4rpp, CELBpts, CHTBSptspp, DHAPT, FRUpts2pp, FRUptspp, GALTptspp, GAMptspp, GLCptspp, HXAND, LALGP, MALTptspp, MANGLYCptspp, MANptspp, MNLptspp, SBTptspp, SUCptspp, TREptspp, XAND
9356	-49.5361	EX_succ_e	10.8056	-10	0.0694611	4	30.0575	-13.0428	25.8624	-3.81046	8.00562	b2415, b3736, b3035, b0037	2DGLCptspp, ACGAptspp, ACMANAptspp, ACMUMptspp, ARBTptspp, ASCBptspp, ATPS4rpp, CELBpts, CHTBSptspp, CMtpp, CRNCAL2, CRNDCAL2, CTBTCAL2, DHAPT, DOXRBCNtpp, FEENTERtex, FRUpts2pp, FRUptspp, FUSAtpp, GALTptspp, GAMptspp, GLCptspp, INDOLEt2pp, MALTptspp, MANGLYCptspp, MANptspp, MINCYCtpp, MNLptspp, NOVBCNtpp, RFAMPtpp, SBTptspp, SUCptspp, TREptspp, TTRCYCtpp
9357	-49.5361	EX_succ_e	10.8056	-10	0.0694611	4	30.0575	-13.0428	25.8624	-3.81046	8.00562	b3916, b2415, b3732, b4034	14GLUCANabcpp, 2DGLCptspp, ACGAptspp, ACMANAptspp, ACMUMptspp, ARBTptspp, ASCBptspp, ATPS4rpp, CELBpts, CHTBSptspp, DHAPT, FRUpts2pp, FRUptspp, GALTptspp, GAMptspp, GLCptspp, MALTHXabcpp, MALTPTabcpp, MALTTRabcpp, MALTTTRabcpp, MALTabcpp, MALTptspp, MANGLYCptspp, MANptspp, MNLptspp, PFK_2, PFK_3, SBTptspp, SUCptspp, TREptspp
9358	-49.5361	EX_succ_e	10.8056	-10	0.0694611	4	30.0575	-13.0428	25.8624	-3.81046	8.00562	b3916, b2415, b3732, b3001	2DGLCptspp, ACGAptspp, ACMANAptspp, ACMUMptspp, ARBTptspp, ASCBptspp, ATPS4rpp, CELBpts, CHTBSptspp, DHAPT, FRUpts2pp, FRUptspp, GALTptspp, GAMptspp, GLCptspp, MALTptspp, MANGLYCptspp, MANptspp, MNLptspp, PFK_2, PFK_3, SBTptspp, SUCptspp, TREptspp
9359	-49.5361	EX_succ_e	10.8056	-10	0.0694611	4	30.0575	-13.0428	25.8624	-3.81046	8.00562	b2415, b3517, b3736, b1090	2DGLCptspp, ACGAptspp, ACMANAptspp, ACMUMptspp, ACPPAT120, ACPPAT140, ACPPAT141, ACPPAT160, ACPPAT161, ACPPAT180, ACPPAT181, ARBTptspp, ASCBptspp, ATPS4rpp, CELBpts, CHTBSptspp, DHAPT, FRUpts2pp, FRUptspp, GALTptspp, GAMptspp, GLCptspp, MALTptspp, MANGLYCptspp, MANptspp, MNLptspp, SBTptspp, SUCptspp, TREptspp
9360	-49.5361	EX_succ_e	10.8056	-10	0.0694611	4	30.0575	-13.0428	25.8624	-3.81046	8.00562	b2415, b3736, b0425, b1090	2DGLCptspp, ACGAptspp, ACMANAptspp, ACMUMptspp, ACPPAT120, ACPPAT140, ACPPAT141, ACPPAT160, ACPPAT161, ACPPAT180, ACPPAT181, ARBTptspp, ASCBptspp, ATPS4rpp, CELBpts, CHTBSptspp, DHAPT, FRUpts2pp, FRUptspp, GALTptspp, GAMptspp, GLCptspp, MALTptspp, MANGLYCptspp, MANptspp, MNLptspp, SBTptspp, SUCptspp, TREptspp
9361	-49.5361	EX_succ_e	10.8056	-10	0.0694611	4	30.0575	-13.0428	25.8624	-3.81046	8.00562	b2415, b3736, b0314, b1090	2DGLCptspp, ACGAptspp, ACMANAptspp, ACMUMptspp, ACPPAT120, ACPPAT140, ACPPAT141, ACPPAT160, ACPPAT161, ACPPAT180, ACPPAT181, ARBTptspp, ASCBptspp, ATPS4rpp, CELBpts, CHTBSptspp, DHAPT, FRUpts2pp, FRUptspp, GALTptspp, GAMptspp, GLCptspp, MALTptspp, MANGLYCptspp, MANptspp, MNLptspp, SBTptspp, SUCptspp, TREptspp
9362	-49.5361	EX_succ_e	10.8056	-10	0.0694611	4	30.0575	-13.0428	25.8624	-3.81046	8.00562	b0337, b2415, b1711, b3736	2DGLCptspp, ACGAptspp, ACMANAptspp, ACMUMptspp, ADOCBLabcpp, ARBTptspp, ASCBptspp, ATPS4rpp, CBIuabcpp, CBL1abcpp, CELBpts, CHTBSptspp, CSND, DHAPT, FRUpts2pp, FRUptspp, GALTptspp, GAMptspp, GLCptspp, MALTptspp, MANGLYCptspp, MANptspp, MNLptspp, SBTptspp, SUCptspp, TREptspp
9363	-49.5361	EX_succ_e	10.8056	-10	0.0694611	4	30.0575	-13.0428	25.8624	-3.81046	8.00562	b0337, b2415, b1622, b3732	2DGLCptspp, ACGAptspp, ACMANAptspp, ACMUMptspp, ARBTptspp, ASCBptspp, ATPS4rpp, CELBpts, CHTBSptspp, CSND, DHAPT, FRUpts2pp, FRUptspp, GALTptspp, GAMptspp, GLCptspp, MALTptspp, MANGLYCptspp, MANptspp, MNLptspp, SBTptspp, SUCptspp, TREptspp
9364	-49.5361	EX_succ_e	10.8056	-10	0.0694611	4	30.0575	-13.0428	25.8624	-3.81046	8.00562	b2415, b4239, b3732, b0037	2DGLCptspp, ACGAptspp, ACMANAptspp, ACMUMptspp, ARBTptspp, ASCBptspp, ATPS4rpp, CELBpts, CHTBSptspp, CRNCAL2, CRNDCAL2, CTBTCAL2, DHAPT, FRUpts2pp, FRUptspp, GALTptspp, GAMptspp, GLCptspp, MALTptspp, MANGLYCptspp, MANptspp, MNLptspp, SBTptspp, SUCptspp, TRE6PH, TREptspp
9365	-49.5361	EX_succ_e	10.8056	-10	0.0694611	4	30.0575	-13.0428	25.8624	-3.81046	8.00562	b2415, b2441, b3732, b1533	2DGLCptspp, ACGAptspp, ACMANAptspp, ACMUMptspp, ARBTptspp, ASCBptspp, ATPS4rpp, CELBpts, CHTBSptspp, DHAPT, ETHAAL, FRUpts2pp, FRUptspp, GALTptspp, GAMptspp, GLCptspp, MALTptspp, MANGLYCptspp, MANptspp, MNLptspp, SBTptspp, SERtpp, SUCptspp, TREptspp
9366	-49.5361	EX_succ_e	10.8056	-10	0.0694611	4	30.0575	-13.0428	25.8624	-3.81046	8.00562	b2708, b2415, b3736, b2156	2DGLCptspp, ACGAptspp, ACMANAptspp, ACMUMptspp, ARBTptspp, ASCBptspp, ATPS4rpp, CELBpts, CHTBSptspp, DHAPT, FRUpts2pp, FRUptspp, GALTptspp, GAMptspp, GLCptspp, LYSt2pp, MALTptspp, MANGLYCptspp, MANptspp, MNLptspp, SBTptspp, SUCptspp, TREptspp
9367	-49.5361	EX_succ_e	10.8056	-10	0.0694611	4	30.0575	-13.0428	25.8624	-3.81046	8.00562	b2415, b3736, b1798, b2156	2DGLCptspp, ACGAptspp, ACMANAptspp, ACMUMptspp, ARBTptspp, ASCBptspp, ATPS4rpp, CELBpts, CHTBSptspp, DHAPT, FRUpts2pp, FRUptspp, GALTptspp, GAMptspp, GLCptspp, LYSt2pp, MALTptspp, MANGLYCptspp, MANptspp, MNLptspp, SBTptspp, SUCptspp, TREptspp
9368	-49.5361	EX_succ_e	10.8056	-10	0.0694611	4	30.0575	-13.0428	25.8624	-3.81046	8.00562	b2415, b3736, b2501, b3824	2DGLCptspp, ACGAptspp, ACMANAptspp, ACMUMptspp, ARBTptspp, ASCBptspp, ATPS4rpp, CELBpts, CHTBSptspp, DHAPT, FRUpts2pp, FRUptspp, GALTptspp, GAMptspp, GLCptspp, MALTptspp, MANGLYCptspp, MANptspp, MNLptspp, PPK, PPK2, SBTptspp, SUCptspp, TREptspp
9369	-49.5361	EX_succ_e	10.8056	-10	0.0694611	4	30.0575	-13.0428	25.8624	-3.81046	8.00562	b2297, b2415, b3732, b1474	2DGLCptspp, ACGAptspp, ACMANAptspp, ACMUMptspp, ARBTptspp, ASCBptspp, ATPS4rpp, CELBpts, CHTBSptspp, DHAPT, FRUpts2pp, FRUptspp, GALTptspp, GAMptspp, GLCptspp, MALTptspp, MANGLYCptspp, MANptspp, MNLptspp, PTA2, SBTptspp, SUCptspp, TREptspp
9370	-49.5361	EX_succ_e	10.8056	-10	0.0694611	4	30.0575	-13.0428	25.8624	-3.81046	8.00562	b2297, b2415, b3732, b2927	2DGLCptspp, ACGAptspp, ACMANAptspp, ACMUMptspp, ARBTptspp, ASCBptspp, ATPS4rpp, CELBpts, CHTBSptspp, DHAPT, FRUpts2pp, FRUptspp, GALTptspp, GAMptspp, GLCptspp, MALTptspp, MANGLYCptspp, MANptspp, MNLptspp, PTA2, SBTptspp, SUCptspp, TREptspp
9371	-49.5361	EX_succ_e	10.8056	-10	0.0694611	4	30.0575	-13.0428	25.8624	-3.81046	8.00562	b2378, b2297, b2415, b3736	2DGLCptspp, ACGAptspp, ACMANAptspp, ACMUMptspp, ARBTptspp, ASCBptspp, ATPS4rpp, CELBpts, CHTBSptspp, DHAPT, EDTXS3, FRUpts2pp, FRUptspp, GALTptspp, GAMptspp, GLCptspp, MALTptspp, MANGLYCptspp, MANptspp, MNLptspp, PTA2, SBTptspp, SUCptspp, TREptspp
9372	-49.5361	EX_succ_e	10.8056	-10	0.0694611	4	30.0575	-13.0428	25.8624	-3.81046	8.00562	b3115, b2415, b2541, b3732	2DGLCptspp, ACGAptspp, ACMANAptspp, ACMUMptspp, ARBTptspp, ASCBptspp, ATPS4rpp, CELBpts, CHTBSptspp, DHAPT, DHCIND, DHPPD, FRUpts2pp, FRUptspp, GALTptspp, GAMptspp, GLCptspp, MALTptspp, MANGLYCptspp, MANptspp, MNLptspp, PPAKr, SBTptspp, SUCptspp, TREptspp
9373	-49.5361	EX_succ_e	10.8056	-10	0.0694611	4	30.0575	-13.0428	25.8624	-3.81046	8.00562	b2297, b2415, b1761, b3736	2DGLCptspp, ACGAptspp, ACMANAptspp, ACMUMptspp, ARBTptspp, ASCBptspp, ATPS4rpp, CELBpts, CHTBSptspp, DHAPT, FRUpts2pp, FRUptspp, GALTptspp, GAMptspp, GLCptspp, MALTptspp, MANGLYCptspp, MANptspp, MNLptspp, PTA2, SBTptspp, SUCptspp, TREptspp
9374	-49.5361	EX_succ_e	10.8056	-10	0.0694611	4	30.0575	-13.0428	25.8624	-3.81046	8.00562	b3115, b2415, b3732, b0315	2DGLCptspp, ACGAptspp, ACMANAptspp, ACMUMptspp, ARBTptspp, ASCBptspp, ATPS4rpp, CELBpts, CHTBSptspp, DHAPT, FRUpts2pp, FRUptspp, GALTptspp, GAMptspp, GLCptspp, MALTptspp, MANGLYCptspp, MANptspp, MNLptspp, PPAKr, SBTptspp, SUCptspp, TREptspp
9375	-49.5361	EX_succ_e	10.8056	-10	0.0694611	4	30.0575	-13.0428	25.8624	-3.81046	8.00562	b2415, b3736, b2917, b3116	2DGLCptspp, ACGAptspp, ACMANAptspp, ACMUMptspp, ARBTptspp, ASCBptspp, ATPS4rpp, CELBpts, CHTBSptspp, DHAPT, FRUpts2pp, FRUptspp, GALTptspp, GAMptspp, GLCptspp, MALTptspp, MANGLYCptspp, MANptspp, MMM, MNLptspp, SBTptspp, SUCptspp, THRt2rpp, TREptspp
9376	-49.5361	EX_succ_e	10.8056	-10	0.0694611	4	30.0575	-13.0428	25.8624	-3.81046	8.00562	b1590, b2415, b4123, b3736	2DGLCptspp, ACGAptspp, ACMANAptspp, ACMUMptspp, ARBTptspp, ASCBptspp, ATPS4rpp, CELBpts, CHTBSptspp, DHAPT, FRUpts2pp, FRUptspp, GALTptspp, GAMptspp, GLCptspp, MALTptspp, MANGLYCptspp, MANptspp, MNLptspp, SBTptspp, SELR, SUCTARTtpp, SUCptspp, TARTt2_3pp, TREptspp
9377	-49.5361	EX_succ_e	10.8056	-10	0.0694611	4	30.0575	-13.0428	25.8624	-3.81046	8.00562	b2415, b1224, b4123, b3732	2DGLCptspp, ACGAptspp, ACMANAptspp, ACMUMptspp, ARBTptspp, ASCBptspp, ATPS4rpp, CELBpts, CHTBSptspp, DHAPT, FRUpts2pp, FRUptspp, GALTptspp, GAMptspp, GLCptspp, MALTptspp, MANGLYCptspp, MANptspp, MNLptspp, SBTptspp, SUCTARTtpp, SUCptspp, TARTt2_3pp, TREptspp
9378	-49.5361	EX_succ_e	10.8056	-10	0.0694611	4	30.0575	-13.0428	25.8624	-3.81046	8.00562	b1854, b2415, b3732, b2309	2DGLCptspp, ACGAptspp, ACMANAptspp, ACMUMptspp, ARBTptspp, ASCBptspp, ATPS4rpp, CELBpts, CHTBSptspp, DHAPT, FRUpts2pp, FRUptspp, GALTptspp, GAMptspp, GLCptspp, HISabcpp, MALTptspp, MANGLYCptspp, MANptspp, MNLptspp, PYK2, PYK3, PYK4, PYK6, SBTptspp, SUCptspp, TREptspp
9379	-49.5361	EX_succ_e	10.8056	-10	0.0694611	4	30.0575	-13.0428	25.8624	-3.81046	8.00562	b2415, b4381, b3738, b1710	2DGLCptspp, ACGAptspp, ACMANAptspp, ACMUMptspp, ARBTptspp, ASCBptspp, ATPS4rpp, CELBpts, CHTBSptspp, DHAPT, DRPA, FRUpts2pp, FRUptspp, GALTptspp, GAMptspp, GLCptspp, GTHPi, MALTptspp, MANGLYCptspp, MANptspp, MNLptspp, SBTptspp, SUCptspp, TREptspp
9380	-49.5361	EX_succ_e	10.8056	-10	0.0694611	4	30.0575	-13.0428	25.8624	-3.81046	8.00562	b4025, b2415, b3732, b4085	2DGLCptspp, ACGAptspp, ACMANAptspp, ACMUMptspp, ALLULPE, ARBTptspp, ASCBptspp, ATPS4rpp, CELBpts, CHTBSptspp, DHAPT, FRUpts2pp, FRUptspp, GALTptspp, GAMptspp, GLCptspp, MALTptspp, MANGLYCptspp, MANptspp, MNLptspp, PGI, SBTptspp, SUCptspp, TREptspp
9381	-49.5361	EX_succ_e	10.8056	-10	0.0694611	4	30.0575	-13.0428	25.8624	-3.81046	8.00562	b4025, b2415, b3736, b2813	2DGLCptspp, ACGAptspp, ACMANAptspp, ACMUMptspp, ARBTptspp, ASCBptspp, ATPS4rpp, CELBpts, CHTBSptspp, DHAPT, FRUpts2pp, FRUptspp, GALTptspp, GAMptspp, GLCptspp, MALTptspp, MANGLYCptspp, MANptspp, MNLptspp, PGI, SBTptspp, SUCptspp, TREptspp
9382	-49.5361	EX_succ_e	10.8056	-10	0.0694611	4	30.0575	-13.0428	25.8624	-3.81046	8.00562	b4025, b2415, b4244, b3732	2DGLCptspp, ACGAptspp, ACMANAptspp, ACMUMptspp, ARBTptspp, ASCBptspp, ATPS4rpp, CELBpts, CHTBSptspp, DHAPT, FRUpts2pp, FRUptspp, GALTptspp, GAMptspp, GLCptspp, MALTptspp, MANGLYCptspp, MANptspp, MNLptspp, PGI, SBTptspp, SUCptspp, TREptspp
9383	-49.5361	EX_succ_e	10.8056	-10	0.0694611	4	30.0575	-13.0428	25.8624	-3.81046	8.00562	b4025, b2415, b3732, b3479	2DGLCptspp, ACGAptspp, ACMANAptspp, ACMUMptspp, ARBTptspp, ASCBptspp, ATPS4rpp, CELBpts, CHTBSptspp, DHAPT, FRUpts2pp, FRUptspp, GALTptspp, GAMptspp, GLCptspp, MALTptspp, MANGLYCptspp, MANptspp, MNLptspp, PGI, SBTptspp, SUCptspp, TREptspp
9384	-49.5361	EX_succ_e	10.8056	-10	0.0694611	4	30.0575	-13.0428	25.8624	-3.81046	8.00562	b4025, b2415, b3732, b3733	2DGLCptspp, ACGAptspp, ACMANAptspp, ACMUMptspp, ARBTptspp, ASCBptspp, ATPS4rpp, CELBpts, CHTBSptspp, DHAPT, FRUpts2pp, FRUptspp, GALTptspp, GAMptspp, GLCptspp, MALTptspp, MANGLYCptspp, MANptspp, MNLptspp, PGI, SBTptspp, SUCptspp, TREptspp
9385	-49.5361	EX_succ_e	10.8056	-10	0.0694611	4	30.0575	-13.0428	25.8624	-3.81046	8.00562	b4025, b2415, b3732, b2796	2DGLCptspp, ACGAptspp, ACMANAptspp, ACMUMptspp, ARBTptspp, ASCBptspp, ATPS4rpp, CELBpts, CHTBSptspp, DHAPT, FRUpts2pp, FRUptspp, GALTptspp, GAMptspp, GLCptspp, MALTptspp, MANGLYCptspp, MANptspp, MNLptspp, PGI, SBTptspp, SUCptspp, TREptspp
9386	-49.5361	EX_succ_e	10.8056	-10	0.0694611	4	30.0575	-13.0428	25.8624	-3.81046	8.00562	b4025, b2415, b3732, b3734	2DGLCptspp, ACGAptspp, ACMANAptspp, ACMUMptspp, ARBTptspp, ASCBptspp, ATPS4rpp, CELBpts, CHTBSptspp, DHAPT, FRUpts2pp, FRUptspp, GALTptspp, GAMptspp, GLCptspp, MALTptspp, MANGLYCptspp, MANptspp, MNLptspp, PGI, SBTptspp, SUCptspp, TREptspp
9387	-49.5361	EX_succ_e	10.8056	-10	0.0694611	4	30.0575	-13.0428	25.8624	-3.81046	8.00562	b4025, b2415, b2361, b3736	2DGLCptspp, ACGAptspp, ACMANAptspp, ACMUMptspp, ARBTptspp, ASCBptspp, ATPS4rpp, CELBpts, CHTBSptspp, DHAPT, FRUpts2pp, FRUptspp, GALTptspp, GAMptspp, GLCptspp, MALTptspp, MANGLYCptspp, MANptspp, MNLptspp, PGI, SBTptspp, SUCptspp, TREptspp
9388	-49.5361	EX_succ_e	10.8056	-10	0.0694611	4	30.0575	-13.0428	25.8624	-3.81046	8.00562	b4025, b2415, b3732, b0211	2DGLCptspp, ACGAptspp, ACMANAptspp, ACMUMptspp, ARBTptspp, ASCBptspp, ATPS4rpp, CELBpts, CHTBSptspp, DHAPT, FRUpts2pp, FRUptspp, GALTptspp, GAMptspp, GLCptspp, MALTptspp, MANGLYCptspp, MANptspp, MNLptspp, PGI, SBTptspp, SUCptspp, TREptspp
9389	-49.5361	EX_succ_e	10.8056	-10	0.0694611	4	30.0575	-13.0428	25.8624	-3.81046	8.00562	b4025, b2415, b3732, b3737	2DGLCptspp, ACGAptspp, ACMANAptspp, ACMUMptspp, ARBTptspp, ASCBptspp, ATPS4rpp, CELBpts, CHTBSptspp, DHAPT, FRUpts2pp, FRUptspp, GALTptspp, GAMptspp, GLCptspp, MALTptspp, MANGLYCptspp, MANptspp, MNLptspp, PGI, SBTptspp, SUCptspp, TREptspp
9390	-49.5361	EX_succ_e	10.8056	-10	0.0694611	4	30.0575	-13.0428	25.8624	-3.81046	8.00562	b4025, b2415, b3732, b3208	2DGLCptspp, ACGAptspp, ACMANAptspp, ACMUMptspp, ARBTptspp, ASCBptspp, ATPS4rpp, CELBpts, CHTBSptspp, DHAPT, FRUpts2pp, FRUptspp, GALTptspp, GAMptspp, GLCptspp, MALTptspp, MANGLYCptspp, MANptspp, MNLptspp, PGI, SBTptspp, SUCptspp, TREptspp
9391	-49.5361	EX_succ_e	10.8056	-10	0.0694611	4	30.0575	-13.0428	25.8624	-3.81046	8.00562	b2415, b3736, b3909, b0508	2DGLCptspp, ACGAptspp, ACMANAptspp, ACMUMptspp, ARBTptspp, ASCBptspp, ATPS4rpp, CELBpts, CHTBSptspp, DDGLCNt2rpp, DHAPT, FRUpts2pp, FRUptspp, GALTptspp, GAMptspp, GLCptspp, HPYRI, MALTptspp, MANGLYCptspp, MANptspp, MNLptspp, SBTptspp, SUCptspp, TREptspp
9392	-49.5361	EX_succ_e	10.8056	-10	0.0694611	4	30.0575	-13.0428	25.8624	-3.81046	8.00562	b2415, b3732, b0612, b2923	2DGLCptspp, ACGAptspp, ACMANAptspp, ACMUMptspp, ARBTptspp, ARGt3pp, ASCBptspp, ATPS4rpp, CELBpts, CHTBSptspp, CITt7pp, DHAPT, FRUpts2pp, FRUptspp, GALTptspp, GAMptspp, GLCptspp, MALTptspp, MANGLYCptspp, MANptspp, MNLptspp, SBTptspp, SUCptspp, TREptspp
9393	-49.5361	EX_succ_e	10.8056	-10	0.0694611	4	30.0575	-13.0428	25.8624	-3.81046	8.00562	b1134, b2415, b3738, b3503	2DGLCptspp, ACGAptspp, ACMANAptspp, ACMUMptspp, ARBTptspp, ASCBptspp, ASR, ATPS4rpp, CELBpts, CHTBSptspp, DHAPT, FRUpts2pp, FRUptspp, GALTptspp, GAMptspp, GLCptspp, MALTptspp, MANGLYCptspp, MANptspp, MNLptspp, SBTptspp, SUCptspp, TDP, TREptspp
9394	-49.5361	EX_succ_e	10.8056	-10	0.0694611	4	30.0575	-13.0428	25.8624	-3.81046	8.00562	b1134, b2415, b3736, b3656	2DGLCptspp, ACGAptspp, ACMANAptspp, ACMUMptspp, ARBTptspp, ASCBptspp, ATPS4rpp, CELBpts, CHTBSptspp, DHAPT, FRUpts2pp, FRUptspp, GALTptspp, GAMptspp, GLCptspp, MALTptspp, MANGLYCptspp, MANptspp, MNLptspp, SBTptspp, SUCptspp, TDP, TREptspp, XYHDL
9395	-49.5361	EX_succ_e	10.8056	-10	0.0694611	4	30.0575	-13.0428	25.8624	-3.81046	8.00562	b1134, b2415, b3738, b3580	2DGLCptspp, 3KGK, ACGAptspp, ACMANAptspp, ACMUMptspp, ARBTptspp, ASCBptspp, ATPS4rpp, CELBpts, CHTBSptspp, DHAPT, FRUpts2pp, FRUptspp, GALTptspp, GAMptspp, GLCptspp, MALTptspp, MANGLYCptspp, MANptspp, MNLptspp, SBTptspp, SUCptspp, TDP, TREptspp
9396	-49.5361	EX_succ_e	10.8056	-10	0.0694611	4	30.0575	-13.0428	25.8624	-3.81046	8.00562	b2518, b1134, b2415, b3736	2DGLCptspp, ACGAptspp, ACMANAptspp, ACMUMptspp, ARBTptspp, ASCBptspp, ATPS4rpp, CELBpts, CHTBSptspp, DHAPT, FRUpts2pp, FRUptspp, GALTptspp, GAMptspp, GLCptspp, MALTptspp, MANGLYCptspp, MANptspp, MNLptspp, SBTptspp, SUCptspp, TDP, TREptspp
9397	-49.5361	EX_succ_e	10.8056	-10	0.0694611	4	30.0575	-13.0428	25.8624	-3.81046	8.00562	b2415, b0655, b3736, b1388	2DGLCptspp, ACGAptspp, ACMANAptspp, ACMUMptspp, ARBTptspp, ASCBptspp, ASPabcpp, ATPS4rpp, CELBpts, CHTBSptspp, DHAPT, FRUpts2pp, FRUptspp, GALTptspp, GAMptspp, GLCptspp, GLUabcpp, MALTptspp, MANGLYCptspp, MANptspp, MNLptspp, PACCOAE, SBTptspp, SUCptspp, TREptspp
9398	-49.5361	EX_succ_e	10.8056	-10	0.0694611	4	30.0575	-13.0428	25.8624	-3.81046	8.00562	b2521, b2415, b3736, b1396	2DGLCptspp, ACGAptspp, ACMANAptspp, ACMUMptspp, ARBTptspp, ASCBptspp, ATPS4rpp, CELBpts, CHTBSptspp, DHAPT, FRUpts2pp, FRUptspp, GALTptspp, GAMptspp, GLCptspp, HPACOAT, MALTptspp, MANGLYCptspp, MANptspp, MCPST, MNLptspp, PACOAT, SBTptspp, SUCptspp, TREptspp
9399	-49.5361	EX_succ_e	10.8056	-10	0.0694611	4	30.0575	-13.0428	25.8624	-3.81046	8.00562	b0593, b2415, b3736, b3029	2DGLCptspp, ACGAptspp, ACMANAptspp, ACMUMptspp, ARBTptspp, ASCBptspp, ATPS4rpp, CELBpts, CHTBSptspp, DHAPT, FRUpts2pp, FRUptspp, GALTptspp, GAMptspp, GLCptspp, ICHORS_copy1, MALTptspp, MANGLYCptspp, MANptspp, MNLptspp, QMO2, QMO3, SBTptspp, SUCptspp, TREptspp
9400	-49.5361	EX_succ_e	10.8056	-10	0.0694611	4	30.0575	-13.0428	25.8624	-3.81046	8.00562	b2415, b3736, b1514, b1393	2DGLCptspp, ACGAptspp, ACMANAptspp, ACMUMptspp, AI2abcpp, ARBTptspp, ASCBptspp, ATPS4rpp, CELBpts, CHTBSptspp, DHACOAH, DHAPT, FRUpts2pp, FRUptspp, GALTptspp, GAMptspp, GLCptspp, MALTptspp, MANGLYCptspp, MANptspp, MNLptspp, SBTptspp, SUCptspp, TREptspp
9401	-49.5361	EX_succ_e	10.8056	-10	0.0694611	4	30.0575	-13.0428	25.8624	-3.81046	8.00562	b2415, b0365, b3732, b0591	2DGLCptspp, ACGAptspp, ACMANAptspp, ACMUMptspp, ARBTptspp, ASCBptspp, ATPS4rpp, CELBpts, CHTBSptspp, DHAPT, FEENTERtpp, FRUpts2pp, FRUptspp, GALTptspp, GAMptspp, GLCptspp, MALTptspp, MANGLYCptspp, MANptspp, MNLptspp, SBTptspp, SUCptspp, TAURabcpp, TREptspp
9402	-49.5361	EX_succ_e	10.8056	-10	0.0694611	4	30.0575	-13.0428	25.8624	-3.81046	8.00562	b2415, b3736, b3751, b0591	2DGLCptspp, ACGAptspp, ACMANAptspp, ACMUMptspp, ARBTptspp, ASCBptspp, ATPS4rpp, CELBpts, CHTBSptspp, DHAPT, FEENTERtpp, FRUpts2pp, FRUptspp, GALTptspp, GAMptspp, GLCptspp, MALTptspp, MANGLYCptspp, MANptspp, MNLptspp, SBTptspp, SUCptspp, TREptspp
9403	-49.5361	EX_succ_e	10.8056	-10	0.0694611	4	30.0575	-13.0428	25.8624	-3.81046	8.00562	b2415, b3736, b3909, b4291	2DGLCptspp, ACGAptspp, ACMANAptspp, ACMUMptspp, ARBTptspp, ASCBptspp, ATPS4rpp, CELBpts, CHTBSptspp, DDGLCNt2rpp, DHAPT, FE3DCITtonex, FRUpts2pp, FRUptspp, GALTptspp, GAMptspp, GLCptspp, MALTptspp, MANGLYCptspp, MANptspp, MNLptspp, SBTptspp, SUCptspp, TREptspp
9404	-49.5361	EX_succ_e	10.8056	-10	0.0694611	4	30.0575	-13.0428	25.8624	-3.81046	8.00562	b2415, b3732, b4321, b3542	2DGLCptspp, ACGAptspp, ACMANAptspp, ACMUMptspp, ARBTptspp, ASCBptspp, ATPS4rpp, CELBpts, CGLYabcpp, CHTBSptspp, DHAPT, FRUURt2rpp, FRUpts2pp, FRUptspp, GALTptspp, GAMptspp, GLCptspp, MALTptspp, MANGLYCptspp, MANptspp, MNLptspp, PROGLYabcpp, SBTptspp, SUCptspp, TREptspp
9405	-49.5361	EX_succ_e	10.8056	-10	0.0694611	4	30.0575	-13.0428	25.8624	-3.81046	8.00562	b0337, b2415, b3732, b0199	2DGLCptspp, ACGAptspp, ACMANAptspp, ACMUMptspp, ARBTptspp, ASCBptspp, ATPS4rpp, CELBpts, CHTBSptspp, CSND, DHAPT, FRUpts2pp, FRUptspp, GALTptspp, GAMptspp, GLCptspp, MALTptspp, MANGLYCptspp, MANptspp, METDabcpp, METabcpp, MNLptspp, SBTptspp, SUCptspp, TREptspp
9406	-49.5361	EX_succ_e	10.8056	-10	0.0694611	4	30.0575	-13.0428	25.8624	-3.81046	8.00562	b2222, b2415, b3736, b2933	2DGLCptspp, ACGAptspp, ACMANAptspp, ACMUMptspp, ARBTptspp, ASCBptspp, ATPS4rpp, BUTCT, CELBpts, CHTBSptspp, DHAPT, FRUpts2pp, FRUptspp, GALTptspp, GAMptspp, GLCptspp, HXCT, MALTptspp, MANGLYCptspp, MANptspp, MNLptspp, SBTptspp, SUCptspp, TREptspp
9407	-49.5361	EX_succ_e	10.8056	-10	0.0694611	4	30.0575	-13.0428	25.8624	-3.81046	8.00562	b2221, b2415, b3736, b4034	14GLUCANabcpp, 2DGLCptspp, ACGAptspp, ACMANAptspp, ACMUMptspp, ARBTptspp, ASCBptspp, ATPS4rpp, BUTCT, CELBpts, CHTBSptspp, DHAPT, FRUpts2pp, FRUptspp, GALTptspp, GAMptspp, GLCptspp, HXCT, MALTHXabcpp, MALTPTabcpp, MALTTRabcpp, MALTTTRabcpp, MALTabcpp, MALTptspp, MANGLYCptspp, MANptspp, MNLptspp, SBTptspp, SUCptspp, TREptspp
9408	-49.5361	EX_succ_e	10.8056	-10	0.0694611	4	30.0575	-13.0428	25.8624	-3.81046	8.00562	b2222, b2415, b3732, b2092	2DGLCptspp, ACGAptspp, ACMANAptspp, ACMUMptspp, ARBTptspp, ASCBptspp, ATPS4rpp, BUTCT, CELBpts, CHTBSptspp, DHAPT, FRUpts2pp, FRUptspp, GALTptspp, GAMptspp, GLCptspp, HXCT, MALTptspp, MANGLYCptspp, MANptspp, MNLptspp, SBTptspp, SUCptspp, TREptspp
9409	-49.5361	EX_succ_e	10.8056	-10	0.0694611	4	30.0575	-13.0428	25.8624	-3.81046	8.00562	b2415, b3732, b0698, b2133	2DGLCptspp, ACGAptspp, ACMANAptspp, ACMUMptspp, ARBTptspp, ASCBptspp, ATPS4rpp, CELBpts, CHTBSptspp, DHAPT, FRUpts2pp, FRUptspp, GALTptspp, GAMptspp, GLCptspp, Kabcpp, LDH_D2, MALTptspp, MANGLYCptspp, MANptspp, MNLptspp, SBTptspp, SUCptspp, TREptspp
9410	-49.5361	EX_succ_e	10.8056	-10	0.0694611	4	30.0575	-13.0428	25.8624	-3.81046	8.00562	b0928, b0517, b2415, b3736	2DGLCptspp, ACGAptspp, ACMANAptspp, ACMUMptspp, ARBTptspp, ASCBptspp, ATPS4rpp, CELBpts, CHTBSptspp, CYSTA, DHAPT, FRUpts2pp, FRUptspp, GALTptspp, GAMptspp, GLCptspp, MALTptspp, MANGLYCptspp, MANptspp, MNLptspp, SBTptspp, SUCptspp, TREptspp, URDGLYCD
9411	-49.5361	EX_succ_e	10.8056	-10	0.0694611	4	30.0575	-13.0428	25.8624	-3.81046	8.00562	b2415, b3665, b2675, b3736	2DGLCptspp, ACGAptspp, ACMANAptspp, ACMUMptspp, ADD, ARBTptspp, ASCBptspp, ATPS4rpp, CELBpts, CHTBSptspp, DHAPT, FRUpts2pp, FRUptspp, GALTptspp, GAMptspp, GLCptspp, MALTptspp, MANGLYCptspp, MANptspp, MNLptspp, RNDR1b, RNDR2b, RNDR3b, RNDR4b, SBTptspp, SUCptspp, TREptspp
9412	-49.5361	EX_succ_e	10.8056	-10	0.0694611	4	30.0575	-13.0428	25.8624	-3.81046	8.00562	b1854, b2415, b3738, b3476	2DGLCptspp, ACGAptspp, ACMANAptspp, ACMUMptspp, ARBTptspp, ASCBptspp, ATPS4rpp, CELBpts, CHTBSptspp, DHAPT, FRUpts2pp, FRUptspp, GALTptspp, GAMptspp, GLCptspp, MALTptspp, MANGLYCptspp, MANptspp, MNLptspp, PYK2, PYK3, PYK4, PYK6, SBTptspp, SUCptspp, TREptspp
9413	-49.5361	EX_succ_e	10.8056	-10	0.0694611	4	30.0575	-13.0428	25.8624	-3.81046	8.00562	b1854, b2415, b2723, b3732	2DGLCptspp, ACGAptspp, ACMANAptspp, ACMUMptspp, ARBTptspp, ASCBptspp, ATPS4rpp, CELBpts, CHTBSptspp, DHAPT, FRUpts2pp, FRUptspp, GALTptspp, GAMptspp, GLCptspp, MALTptspp, MANGLYCptspp, MANptspp, MNLptspp, PYK2, PYK3, PYK4, PYK6, SBTptspp, SUCptspp, TREptspp
9414	-49.5361	EX_succ_e	10.8056	-10	0.0694611	4	30.0575	-13.0428	25.8624	-3.81046	8.00562	b2415, b2587, b3738, b0543	2DGLCptspp, ACGAptspp, ACMANAptspp, ACMUMptspp, AKGt2rpp, ARBTptspp, ASCBptspp, ATPS4rpp, CELBpts, CHLt3pp, CHTBSptspp, DHAPT, FRUpts2pp, FRUptspp, GALTptspp, GAMptspp, GLCptspp, GLYBt3pp, MALTptspp, MANGLYCptspp, MANptspp, MNLptspp, SBTptspp, SUCptspp, TREptspp
9415	-49.5361	EX_succ_e	10.8056	-10	0.0694611	4	30.0575	-13.0428	25.8624	-3.81046	8.00562	b2979, b2415, b3732, b3930	2DGLCptspp, ACGAptspp, ACMANAptspp, ACMUMptspp, ARBTptspp, ASCBptspp, ATPS4rpp, CELBpts, CHTBSptspp, DHAPT, DHNAOT4, FRUpts2pp, FRUptspp, GALTptspp, GAMptspp, GLCptspp, GLYCTO2, GLYCTO3, GLYCTO4, MALTptspp, MANGLYCptspp, MANptspp, MNLptspp, SBTptspp, SUCptspp, TREptspp
9416	-49.5361	EX_succ_e	10.8056	-10	0.0694611	4	30.0575	-13.0428	25.8624	-3.81046	8.00562	b2415, b3736, b0308, b0826	2DGLCptspp, ACGAptspp, ACMANAptspp, ACMUMptspp, ARBTptspp, ASCBptspp, ATPS4rpp, CELBpts, CHTBSptspp, DHAPT, FRUpts2pp, FRUptspp, GALTptspp, GAMptspp, GLCptspp, MALTptspp, MANGLYCptspp, MANptspp, MNLptspp, MPTSS, SBTptspp, SUCptspp, TREptspp
9417	-49.5361	EX_succ_e	10.8056	-10	0.0694611	4	30.0575	-13.0428	25.8624	-3.81046	8.00562	b2415, b3736, b0826, b0465	2DGLCptspp, ACGAptspp, ACMANAptspp, ACMUMptspp, ARBTptspp, ASCBptspp, ATPS4rpp, CELBpts, CHTBSptspp, DHAPT, FRUpts2pp, FRUptspp, GALTptspp, GAMptspp, GLCptspp, MALTptspp, MANGLYCptspp, MANptspp, MNLptspp, MPTSS, SBTptspp, SUCptspp, TREptspp
9418	-49.5361	EX_succ_e	10.8056	-10	0.0694611	4	30.0575	-13.0428	25.8624	-3.81046	8.00562	b0120, b2415, b3732, b2197	2DGLCptspp, ACGAptspp, ACMANAptspp, ACMUMptspp, ADMDC, ARBTptspp, ASCBptspp, ATPS4rpp, CELBpts, CHTBSptspp, DHAPT, FRUpts2pp, FRUptspp, GALTptspp, GAMptspp, GLCptspp, MALTptspp, MANGLYCptspp, MANptspp, MNLptspp, PHEMEabcpp, SBTptspp, SUCptspp, TREptspp
9419	-49.5361	EX_succ_e	10.8056	-10	0.0694611	4	30.0575	-13.0428	25.8624	-3.81046	8.00562	b1612, b2415, b3736, b4478	2DGLCptspp, ACGAptspp, ACMANAptspp, ACMUMptspp, ARBTptspp, ASCBptspp, ATPS4rpp, CELBpts, CHTBSptspp, DHAPT, FRUpts2pp, FRUptspp, GALCTND, GALTptspp, GAMptspp, GLCptspp, MALTptspp, MANGLYCptspp, MANptspp, MNLptspp, SBTptspp, SUCptspp, TREptspp
9420	-49.5361	EX_succ_e	10.8056	-10	0.0694611	4	30.0575	-13.0428	25.8624	-3.81046	8.00562	b2415, b4169, b3738, b2480	2DGLCptspp, ACGAptspp, ACMANAptspp, ACMUMptspp, ARBTptspp, ASCBptspp, ATPS4rpp, CELBpts, CHTBSptspp, DHAPT, FRUpts2pp, FRUptspp, GALTptspp, GAMptspp, GLCptspp, MALTptspp, MANGLYCptspp, MANptspp, MNLptspp, SBTptspp, SUCptspp, TREptspp
9421	-49.5361	EX_succ_e	10.8056	-10	0.0694611	4	30.0575	-13.0428	25.8624	-3.81046	8.00562	b2415, b3738, b3735, b3125	2DGLCptspp, ACGAptspp, ACMANAptspp, ACMUMptspp, ARBTptspp, ASCBptspp, ATPS4rpp, CELBpts, CHTBSptspp, DHAPT, FRUpts2pp, FRUptspp, GALTptspp, GAMptspp, GLCptspp, MALTptspp, MANGLYCptspp, MANptspp, MNLptspp, SBTptspp, SUCptspp, TREptspp
9422	-49.5361	EX_succ_e	10.8056	-10	0.0694611	4	30.0575	-13.0428	25.8624	-3.81046	8.00562	b2415, b3736, b3735, b3480	2DGLCptspp, ACGAptspp, ACMANAptspp, ACMUMptspp, ARBTptspp, ASCBptspp, ATPS4rpp, CELBpts, CHTBSptspp, DHAPT, FRUpts2pp, FRUptspp, GALTptspp, GAMptspp, GLCptspp, MALTptspp, MANGLYCptspp, MANptspp, MNLptspp, SBTptspp, SUCptspp, TREptspp
9423	-49.5361	EX_succ_e	10.8056	-10	0.0694611	4	30.0575	-13.0428	25.8624	-3.81046	8.00562	b2415, b1709, b3224, b3732	2DGLCptspp, ACGAptspp, ACMANAptspp, ACMUMptspp, ACNAMt2pp, ADOCBLabcpp, ARBTptspp, ASCBptspp, ATPS4rpp, CBIuabcpp, CBL1abcpp, CELBpts, CHTBSptspp, DHAPT, FRUpts2pp, FRUptspp, GALTptspp, GAMptspp, GLCptspp, MALTptspp, MANGLYCptspp, MANptspp, MNLptspp, SBTptspp, SUCptspp, TREptspp
9424	-49.5361	EX_succ_e	10.8056	-10	0.0694611	4	30.0575	-13.0428	25.8624	-3.81046	8.00562	b1109, b3223, b2415, b3738	2DGLCptspp, ACGAptspp, ACMANAptspp, ACMUMptspp, AMANAPEr, ARBTptspp, ASCBptspp, ATPS4rpp, CELBpts, CHTBSptspp, DHAPT, FRUpts2pp, FRUptspp, GALTptspp, GAMptspp, GLCptspp, MALTptspp, MANGLYCptspp, MANptspp, MNLptspp, SBTptspp, SUCptspp, TREptspp
9425	-49.5361	EX_succ_e	10.8056	-10	0.0694611	4	30.0575	-13.0428	25.8624	-3.81046	8.00562	b2415, b4131, b3732, b4476	2DGLCptspp, ACGAptspp, ACMANAptspp, ACMUMptspp, ARBTptspp, ASCBptspp, ATPS4rpp, CELBpts, CHTBSptspp, DHAPT, FRUpts2pp, FRUptspp, GALTptspp, GAMptspp, GLCptspp, MALTptspp, MANGLYCptspp, MANptspp, MNLptspp, SBTptspp, SUCptspp, TREptspp
9426	-49.5361	EX_succ_e	10.8056	-10	0.0694611	4	30.0575	-13.0428	25.8624	-3.81046	8.00562	b2415, b0828, b3736, b4085	2DGLCptspp, ACGAptspp, ACMANAptspp, ACMUMptspp, ALLULPE, ARBTptspp, ASCBptspp, ATPS4rpp, CELBpts, CHTBSptspp, DHAPT, FRUpts2pp, FRUptspp, GALTptspp, GAMptspp, GLCptspp, MALTptspp, MANGLYCptspp, MANptspp, MNLptspp, SBTptspp, SUCptspp, TREptspp
9427	-49.5361	EX_succ_e	10.8056	-10	0.0694611	4	30.0575	-13.0428	25.8624	-3.81046	8.00562	b2415, b3736, b3374, b1661	2DGLCptspp, ACGAptspp, ACMANAptspp, ACMUMptspp, ARBTptspp, ASCBptspp, ATPS4rpp, CELBpts, CFAS160E, CFAS160G, CFAS180E, CFAS180G, CHTBSptspp, DHAPT, FRULYSK, FRUpts2pp, FRUptspp, GALTptspp, GAMptspp, GLCptspp, MALTptspp, MANGLYCptspp, MANptspp, MNLptspp, SBTptspp, SUCptspp, TREptspp
9428	-49.5361	EX_succ_e	10.8056	-10	0.0694611	4	30.0575	-13.0428	25.8624	-3.81046	8.00562	b3721, b2415, b3736, b0855	2DGLCptspp, ACGAptspp, ACMANAptspp, ACMUMptspp, ARBTptspp, ASCBptspp, ATPS4rpp, CELBpts, CHTBSptspp, DHAPT, FRUpts2pp, FRUptspp, GALTptspp, GAMptspp, GLCptspp, MALTptspp, MANGLYCptspp, MANptspp, MNLptspp, SBTptspp, SUCptspp, TREptspp
9429	-49.5361	EX_succ_e	10.8056	-10	0.0694611	4	30.0575	-13.0428	25.8624	-3.81046	8.00562	b2415, b3849, b3736, b0874	2DGLCptspp, ACGAptspp, ACMANAptspp, ACMUMptspp, ARBTptspp, ASCBptspp, ATPS4rpp, CELBpts, CHTBSptspp, DHAPT, FRUpts2pp, FRUptspp, GALTptspp, GAMptspp, GLCptspp, MALTptspp, MANGLYCptspp, MANptspp, MNLptspp, SBTptspp, SUCptspp, TREptspp
9430	-49.5361	EX_succ_e	10.8056	-10	0.0694611	4	30.0575	-13.0428	25.8624	-3.81046	8.00562	b3952, b2415, b2204, b3737	2DGLCptspp, ACGAptspp, ACMANAptspp, ACMUMptspp, ARBTptspp, ASCBptspp, ATPS4rpp, CELBpts, CHTBSptspp, DHAPT, FRUpts2pp, FRUptspp, GALTptspp, GAMptspp, GLCptspp, MALTptspp, MANGLYCptspp, MANptspp, MNLptspp, NO3R1bpp, SBTptspp, SUCptspp, TREptspp
9431	-49.5361	EX_succ_e	10.8056	-10	0.0694611	4	30.0575	-13.0428	25.8624	-3.81046	8.00562	b2415, b4374, b0186, b3736	2DGLCptspp, ACGAptspp, ACMANAptspp, ACMUMptspp, ARBTptspp, ASCBptspp, ATPS4rpp, CELBpts, CHTBSptspp, DHAPT, FRUpts2pp, FRUptspp, GALTptspp, GAMptspp, GLCptspp, MALTptspp, MANGLYCptspp, MANptspp, MNLptspp, SBTptspp, SUCptspp, TREptspp
9432	-49.5361	EX_succ_e	10.8056	-10	0.0694611	4	30.0575	-13.0428	25.8624	-3.81046	8.00562	b2415, b4079, b3736, b3714	2DGLCptspp, ACGAptspp, ACMANAptspp, ACMUMptspp, ARBTptspp, ASCBptspp, ATPS4rpp, CELBpts, CHTBSptspp, DHAPT, FHL, FRUpts2pp, FRUptspp, GALTptspp, GAMptspp, GLCptspp, MALTptspp, MANGLYCptspp, MANptspp, MNLptspp, SBTptspp, SUCptspp, TREptspp
9433	-49.5361	EX_succ_e	10.8056	-10	0.0694611	4	30.0575	-13.0428	25.8624	-3.81046	8.00562	b2415, b3732, b0268, b2843	2DGLCptspp, ACGAptspp, ACMANAptspp, ACMUMptspp, ARBTptspp, ASCBptspp, ATPS4rpp, CELBpts, CHTBSptspp, DHAPT, FRUpts2pp, FRUptspp, GALTptspp, GAMptspp, GLCptspp, KDUI, MALTptspp, MANGLYCptspp, MANptspp, MNLptspp, SBTptspp, SUCptspp, TREptspp
9434	-49.5361	EX_succ_e	10.8056	-10	0.0694611	4	30.0575	-13.0428	25.8624	-3.81046	8.00562	b2415, b3738, b2255, b1621	2DGLCptspp, ACGAptspp, ACMANAptspp, ACMUMptspp, ARBTptspp, ASCBptspp, ATPS4rpp, CELBpts, CHTBSptspp, DHAPT, FRUpts2pp, FRUptspp, GALTptspp, GAMptspp, GLCptspp, MALTptspp, MANGLYCptspp, MANptspp, MNLptspp, SBTptspp, SUCptspp, TREptspp, UDPGDC, ULA4NFT
9435	-49.5361	EX_succ_e	10.8056	-10	0.0694611	4	30.0575	-13.0428	25.8624	-3.81046	8.00562	b0340, b2415, b3736, b1123	2DGLCptspp, ACGAptspp, ACMANAptspp, ACMUMptspp, ARBTptspp, ASCBptspp, ATPS4rpp, CELBpts, CHTBSptspp, CYNTAH, DHAPT, FRUpts2pp, FRUptspp, GALTptspp, GAMptspp, GLCptspp, MALTptspp, MANGLYCptspp, MANptspp, MNLptspp, SBTptspp, SUCptspp, TREptspp
9436	-49.5361	EX_succ_e	10.8056	-10	0.0694611	4	30.0575	-13.0428	25.8624	-3.81046	8.00562	b1611, b2415, b3732, b3737	2DGLCptspp, ACGAptspp, ACMANAptspp, ACMUMptspp, ARBTptspp, ASCBptspp, ATPS4rpp, CELBpts, CHTBSptspp, DHAPT, FRUpts2pp, FRUptspp, GALTptspp, GAMptspp, GLCptspp, MALTptspp, MANGLYCptspp, MANptspp, MNLptspp, SBTptspp, SUCptspp, TREptspp
9437	-49.5361	EX_succ_e	10.8056	-10	0.0694611	4	30.0575	-13.0428	25.8624	-3.81046	8.00562	b2415, b3336, b3732, b1276	2DGLCptspp, ACGAptspp, ACMANAptspp, ACMUMptspp, ARBTptspp, ASCBptspp, ATPS4rpp, CELBpts, CHTBSptspp, DHAPT, FRUpts2pp, FRUptspp, GALTptspp, GAMptspp, GLCptspp, MALTptspp, MANGLYCptspp, MANptspp, MNLptspp, SBTptspp, SUCptspp, TREptspp
9438	-49.5361	EX_succ_e	10.8056	-10	0.0694611	4	30.0575	-13.0428	25.8624	-3.81046	8.00562	b2415, b1767, b1873, b3732	2DGLCptspp, ACGAptspp, ACMANAptspp, ACMUMptspp, ARBTptspp, ASCBptspp, ATPS4rpp, CELBpts, CHTBSptspp, DHAPT, DMSOR1pp, DMSOR2pp, FRUpts2pp, FRUptspp, GALTptspp, GAMptspp, GLCptspp, MALTptspp, MANGLYCptspp, MANptspp, MNLptspp, SBTptspp, SUCptspp, TREptspp
9439	-49.5361	EX_succ_e	10.8056	-10	0.0694611	4	30.0575	-13.0428	25.8624	-3.81046	8.00562	b2415, b0335, b0186, b3736	2DGLCptspp, ACGAptspp, ACMANAptspp, ACMUMptspp, ARBTptspp, ASCBptspp, ATPS4rpp, CELBpts, CHTBSptspp, DHAPT, FRUpts2pp, FRUptspp, GALTptspp, GAMptspp, GLCptspp, MALTptspp, MANGLYCptspp, MANptspp, MNLptspp, SBTptspp, SUCptspp, TREptspp
9440	-49.5361	EX_succ_e	10.8056	-10	0.0694611	4	30.0575	-13.0428	25.8624	-3.81046	8.00562	b2415, b3738, b4086, b4268	2DGLCptspp, ACGAptspp, ACMANAptspp, ACMUMptspp, ALLabcpp, ARBTptspp, ASCBptspp, ATPS4rpp, CELBpts, CHTBSptspp, DHAPT, FRUpts2pp, FRUptspp, GALTptspp, GAMptspp, GLCptspp, MALTptspp, MANGLYCptspp, MANptspp, MNLptspp, SBTptspp, SUCptspp, TREptspp
9441	-49.5361	EX_succ_e	10.8056	-10	0.0694611	4	30.0575	-13.0428	25.8624	-3.81046	8.00562	b3553, b2415, b3732, b1490	2DGLCptspp, 2DGULRGx, 2DGULRGy, 2DGULRx, 2DGULRy, ACGAptspp, ACMANAptspp, ACMUMptspp, ARBTptspp, ASCBptspp, ATPS4rpp, CELBpts, CHTBSptspp, DHAPT, DKGLCNR2x, DKGLCNR2y, FRUpts2pp, FRUptspp, GALTptspp, GAMptspp, GLCptspp, MALTptspp, MANGLYCptspp, MANptspp, MNLptspp, SBTptspp, SUCptspp, TREptspp
9442	-49.5361	EX_succ_e	10.8056	-10	0.0694611	4	30.0575	-13.0428	25.8624	-3.81046	8.00562	b0339, b2415, b3736, b2010	2DGLCptspp, ACGAptspp, ACMANAptspp, ACMUMptspp, ARBTptspp, ASCBptspp, ATPS4rpp, CELBpts, CHTBSptspp, DHAPT, FRUpts2pp, FRUptspp, GALTptspp, GAMptspp, GLCptspp, MALTptspp, MANGLYCptspp, MANptspp, MNLptspp, SBTptspp, SUCptspp, TREptspp
9443	-49.5361	EX_succ_e	10.8056	-10	0.0694611	4	30.0575	-13.0428	25.8624	-3.81046	8.00562	b1200, b2415, b3732, b3715	2DGLCptspp, ACGAptspp, ACMANAptspp, ACMUMptspp, ARBTptspp, ASCBptspp, ATPS4rpp, CELBpts, CHTBSptspp, DHAPT, FRUpts2pp, FRUptspp, GALTptspp, GAMptspp, GLCptspp, MALTptspp, MANGLYCptspp, MANptspp, MNLptspp, SBTptspp, SUCptspp, TREptspp
9444	-49.5361	EX_succ_e	10.8056	-10	0.0694611	4	30.0575	-13.0428	25.8624	-3.81046	8.00562	b2415, b3736, b4386, b2843	2DGLCptspp, ACGAptspp, ACMANAptspp, ACMUMptspp, ARBTptspp, ASCBptspp, ATPS4rpp, CELBpts, CHTBSptspp, DHAPT, FRUpts2pp, FRUptspp, GALTptspp, GAMptspp, GLCptspp, KDUI, LIPAMPL, LIPATPT, MALTptspp, MANGLYCptspp, MANptspp, MNLptspp, OCTNLL, SBTptspp, SUCptspp, TREptspp
9445	-49.5361	EX_succ_e	10.8056	-10	0.0694611	4	30.0575	-13.0428	25.8624	-3.81046	8.00562	b2415, b3736, b4268, b4298	2DGLCptspp, ACGAptspp, ACMANAptspp, ACMUMptspp, ARBTptspp, ASCBptspp, ATPS4rpp, CELBpts, CHTBSptspp, DHAPT, FRUpts2pp, FRUptspp, GALTptspp, GAMptspp, GLCptspp, MALTptspp, MANGLYCptspp, MANptspp, MNLptspp, SBTptspp, SUCptspp, TREptspp
9446	-49.5361	EX_succ_e	10.8056	-10	0.0694611	4	30.0575	-13.0428	25.8624	-3.81046	8.00562	b2415, b1226, b3736, b4485	2DGLCptspp, ACGAptspp, ACMANAptspp, ACMUMptspp, ARBTptspp, ASCBptspp, ATPS4rpp, CELBpts, CHTBSptspp, DHAPT, FRUpts2pp, FRUptspp, GALTptspp, GAMptspp, GLCptspp, MALTptspp, MANGLYCptspp, MANptspp, MNLptspp, SBTptspp, SUCptspp, TREptspp
9447	-49.5361	EX_succ_e	10.8056	-10	0.0694611	4	30.0575	-13.0428	25.8624	-3.81046	8.00562	b2415, b1767, b3738, b2170	2DGLCptspp, ACGAptspp, ACMANAptspp, ACMUMptspp, ARBTptspp, ASCBptspp, ATPS4rpp, CELBpts, CHTBSptspp, DHAPT, FRUpts2pp, FRUptspp, GALTptspp, GAMptspp, GLCptspp, MALTptspp, MANGLYCptspp, MANptspp, MNLptspp, SBTptspp, SUCptspp, TREptspp
9448	-49.5361	EX_succ_e	10.8056	-10	0.0694611	4	30.0575	-13.0428	25.8624	-3.81046	8.00562	b2415, b0067, b3732, b3478	2DGLCptspp, ACGAptspp, ACMANAptspp, ACMUMptspp, ARBTptspp, ASCBptspp, ATPS4rpp, CELBpts, CHTBSptspp, DHAPT, FRUpts2pp, FRUptspp, GALTptspp, GAMptspp, GLCptspp, MALTptspp, MANGLYCptspp, MANptspp, MNLptspp, SBTptspp, SUCptspp, THMabcpp, TREptspp
9449	-49.5361	EX_succ_e	10.8056	-10	0.0694611	4	30.0575	-13.0428	25.8624	-3.81046	8.00562	b2415, b3845, b2486, b3732	2DGLCptspp, ACGAptspp, ACMANAptspp, ACMUMptspp, ARBTptspp, ASCBptspp, ATPS4rpp, CELBpts, CHTBSptspp, DHAPT, FRUpts2pp, FRUptspp, GALTptspp, GAMptspp, GLCptspp, MALTptspp, MANGLYCptspp, MANptspp, MNLptspp, SBTptspp, SUCptspp, TREptspp
9450	-49.5361	EX_succ_e	10.8056	-10	0.0694611	4	30.0575	-13.0428	25.8624	-3.81046	8.00562	b1302, b2415, b0849, b3732	2DGLCptspp, ACGAptspp, ACMANAptspp, ACMUMptspp, ARBTptspp, ASCBptspp, ATPS4rpp, CELBpts, CHTBSptspp, DHAPT, FRUpts2pp, FRUptspp, GALTptspp, GAMptspp, GLCptspp, MALTptspp, MANGLYCptspp, MANptspp, MNLptspp, SBTptspp, SUCptspp, TREptspp
9451	-49.5361	EX_succ_e	10.8056	-10	0.0694611	4	30.0575	-13.0428	25.8624	-3.81046	8.00562	b2521, b2415, b3736, b4064	2DGLCptspp, ACGAptspp, ACMANAptspp, ACMUMptspp, ARBTptspp, ASCBptspp, ATPS4rpp, CELBpts, CHTBSptspp, DHAPT, FRUpts2pp, FRUptspp, GALTptspp, GAMptspp, GLCptspp, MALTptspp, MANGLYCptspp, MANptspp, MCPST, MNLptspp, SBTptspp, SUCptspp, TREptspp
9452	-49.5361	EX_succ_e	10.8056	-10	0.0694611	4	30.0575	-13.0428	25.8624	-3.81046	8.00562	b2415, b3736, b3738, b0874	2DGLCptspp, ACGAptspp, ACMANAptspp, ACMUMptspp, ARBTptspp, ASCBptspp, ATPS4rpp, CELBpts, CHTBSptspp, DHAPT, FRUpts2pp, FRUptspp, GALTptspp, GAMptspp, GLCptspp, MALTptspp, MANGLYCptspp, MANptspp, MNLptspp, SBTptspp, SUCptspp, TREptspp
9453	-49.5361	EX_succ_e	10.8056	-10	0.0694611	4	30.0575	-13.0428	25.8624	-3.81046	8.00562	b2415, b1805, b2724, b3736	2DGLCptspp, ACGAptspp, ACMANAptspp, ACMUMptspp, ARBTptspp, ASCBptspp, ATPS4rpp, CELBpts, CHTBSptspp, DHAPT, FRUpts2pp, FRUptspp, GALTptspp, GAMptspp, GLCptspp, MALTptspp, MANGLYCptspp, MANptspp, MNLptspp, SBTptspp, SUCptspp, TREptspp
9454	-49.5361	EX_succ_e	10.8056	-10	0.0694611	4	30.0575	-13.0428	25.8624	-3.81046	8.00562	b2415, b3732, b2701, b3893	2DGLCptspp, ACGAptspp, ACMANAptspp, ACMUMptspp, ARBTptspp, ASCBptspp, ATPS4rpp, CELBpts, CHTBSptspp, DHAPT, FRUpts2pp, FRUptspp, GALTptspp, GAMptspp, GLCptspp, MALTptspp, MANGLYCptspp, MANptspp, MNLptspp, SBTptspp, SUCptspp, TREptspp
9455	-49.5361	EX_succ_e	10.8056	-10	0.0694611	4	30.0575	-13.0428	25.8624	-3.81046	8.00562	b2415, b3736, b3824, b4392	2DGLCptspp, ACGAptspp, ACMANAptspp, ACMUMptspp, ARBTptspp, ASCBptspp, ATPS4rpp, CELBpts, CHTBSptspp, DHAPT, FRUpts2pp, FRUptspp, GALTptspp, GAMptspp, GLCptspp, MALTptspp, MANGLYCptspp, MANptspp, MNLptspp, SBTptspp, SUCptspp, TREptspp
9456	-49.5361	EX_succ_e	10.8056	-10	0.0694611	4	30.0575	-13.0428	25.8624	-3.81046	8.00562	b2293, b2415, b3732, b4311	2DGLCptspp, ACGAptspp, ACMANAptspp, ACMUMptspp, ARBTptspp, ASCBptspp, ATPS4rpp, CELBpts, CHTBSptspp, DHAPT, FRUpts2pp, FRUptspp, GALTptspp, GAMptspp, GLCptspp, MALTptspp, MANGLYCptspp, MANptspp, MNLptspp, RU5PP, SBTptspp, SUCptspp, TREptspp
9457	-49.5361	EX_succ_e	10.8056	-10	0.0694611	4	30.0575	-13.0428	25.8624	-3.81046	8.00562	b2415, b3736, b2997, b4544	2DGLCptspp, ACGAptspp, ACMANAptspp, ACMUMptspp, ARBTptspp, ASCBptspp, ATPS4rpp, CELBpts, CHTBSptspp, DHAPT, FRUpts2pp, FRUptspp, GALTptspp, GAMptspp, GLCptspp, MALTptspp, MANGLYCptspp, MANptspp, MNLptspp, SBTptspp, SUCptspp, TREptspp, ULA4Ntppi
9458	-49.5361	EX_succ_e	10.8056	-10	0.0694611	4	30.0575	-13.0428	25.8624	-3.81046	8.00562	b2415, b3736, b0809, b4394	2DGLCptspp, ACGAptspp, ACMANAptspp, ACMUMptspp, ARBTptspp, ASCBptspp, ATPS4rpp, CELBpts, CHTBSptspp, DHAPT, FRUpts2pp, FRUptspp, GALTptspp, GAMptspp, GLCptspp, GLNabcpp, MALTptspp, MANGLYCptspp, MANptspp, MNLptspp, NTP11, NTP12, SBTptspp, SUCptspp, TREptspp
9459	-49.5361	EX_succ_e	10.8056	-10	0.0694611	4	30.0575	-13.0428	25.8624	-3.81046	8.00562	b3952, b2415, b2882, b3732	2DGLCptspp, ACGAptspp, ACMANAptspp, ACMUMptspp, ARBTptspp, ASCBptspp, ATPS4rpp, CELBpts, CHTBSptspp, DHAPT, FRUpts2pp, FRUptspp, GALTptspp, GAMptspp, GLCptspp, MALTptspp, MANGLYCptspp, MANptspp, MNLptspp, SBTptspp, SUCptspp, TREptspp
9460	-49.5361	EX_succ_e	10.8056	-10	0.0694611	4	30.0575	-13.0428	25.8624	-3.81046	8.00562	b2415, b3738, b1738, b3824	2DGLCptspp, ACGAptspp, ACMANAptspp, ACMUMptspp, ARBTptspp, ASCBptspp, ATPS4rpp, CELBpts, CHTBSptspp, DHAPT, FRUpts2pp, FRUptspp, GALTptspp, GAMptspp, GLCptspp, MALTptspp, MANGLYCptspp, MANptspp, MNLptspp, SBTptspp, SUCptspp, TREptspp
9461	-49.5361	EX_succ_e	10.8056	-10	0.0694611	4	30.0575	-13.0428	25.8624	-3.81046	8.00562	b2104, b2415, b3732, b0756	2DGLCptspp, ACGAptspp, ACMANAptspp, ACMUMptspp, ARBTptspp, ASCBptspp, ATPS4rpp, CELBpts, CHTBSptspp, DHAPT, FRUpts2pp, FRUptspp, GALM2pp, GALTptspp, GAMptspp, GLCptspp, HETZK, MALTptspp, MANGLYCptspp, MANptspp, MNLptspp, SBTptspp, SUCptspp, TREptspp
9462	-49.5361	EX_succ_e	10.8056	-10	0.0694611	4	30.0575	-13.0428	25.8624	-3.81046	8.00562	b2379, b2930, b2415, b3732	2DGLCptspp, ACGAptspp, ACMANAptspp, ACMUMptspp, ARBTptspp, ASCBptspp, ATPS4rpp, CELBpts, CHTBSptspp, DHAPT, FRUpts2pp, FRUptspp, GALTptspp, GAMptspp, GLCptspp, MALTptspp, MANGLYCptspp, MANptspp, MNLptspp, SBTptspp, SUCptspp, TREptspp
9463	-49.5361	EX_succ_e	10.8056	-10	0.0694611	4	30.0575	-13.0428	25.8624	-3.81046	8.00562	b2415, b2091, b2435, b3732	2DGLCptspp, ACGAptspp, ACMANAptspp, ACMUMptspp, ARBTptspp, ASCBptspp, ATPS4rpp, CELBpts, CHTBSptspp, DHAPT, FRUpts2pp, FRUptspp, GALTptspp, GAMptspp, GLCptspp, GLTPD, MALTptspp, MANGLYCptspp, MANptspp, MNLptspp, SBTptspp, SUCptspp, TREptspp
9464	-49.5361	EX_succ_e	10.8056	-10	0.0694611	4	30.0575	-13.0428	25.8624	-3.81046	8.00562	b2415, b0675, b3736, b1734	2DGLCptspp, ACGAptspp, ACMANAptspp, ACMUMptspp, ARBTptspp, ASCBptspp, ATPS4rpp, CELBpts, CHTBSptspp, DHAPT, FRUpts2pp, FRUptspp, GALTptspp, GAMptspp, GLCptspp, MALTptspp, MANGLYCptspp, MANptspp, MC6PH, MNLptspp, SBTptspp, SUCptspp, TREptspp
9465	-49.5361	EX_succ_e	10.8056	-10	0.0694611	4	30.0575	-13.0428	25.8624	-3.81046	8.00562	b2415, b3736, b0308, b0709	2DGLCptspp, ACGAptspp, ACMANAptspp, ACMUMptspp, ARBTptspp, ASCBptspp, ATPS4rpp, CELBpts, CHTBSptspp, DHAPT, FRUpts2pp, FRUptspp, GALTptspp, GAMptspp, GLCptspp, MALTptspp, MANGLYCptspp, MANptspp, MNLptspp, SBTptspp, SUCptspp, TREptspp
9466	-49.5361	EX_succ_e	10.8056	-10	0.0694611	4	30.0575	-13.0428	25.8624	-3.81046	8.00562	b3885, b2415, b3736, b3240	2DGLCptspp, 4HBZt3pp, ACGAptspp, ACMANAptspp, ACMUMptspp, ARBTptspp, ASCBptspp, ATPS4rpp, CELBpts, CHTBSptspp, DHAPT, FRUpts2pp, FRUptspp, GALTptspp, GAMptspp, GLCptspp, MALTptspp, MANGLYCptspp, MANptspp, MNLptspp, SBTptspp, SUCptspp, TREptspp
9467	-49.5361	EX_succ_e	10.8056	-10	0.0694611	4	30.0575	-13.0428	25.8624	-3.81046	8.00562	b3812, b2415, b3732, b3733	2DGLCptspp, ACGAptspp, ACMANAptspp, ACMUMptspp, ARBTptspp, ASCBptspp, ATPS4rpp, CELBpts, CHTBSptspp, DHAPT, FRUpts2pp, FRUptspp, GALTptspp, GAMptspp, GLCptspp, MALTptspp, MANGLYCptspp, MANptspp, MNLptspp, SBTptspp, SUCptspp, TREptspp
9468	-49.5361	EX_succ_e	10.8056	-10	0.0694611	4	30.0575	-13.0428	25.8624	-3.81046	8.00562	b2415, b2817, b3736, b3824	2DGLCptspp, ACGAptspp, ACMANAptspp, ACMUMptspp, ARBTptspp, ASCBptspp, ATPS4rpp, CELBpts, CHTBSptspp, DHAPT, FRUpts2pp, FRUptspp, GALTptspp, GAMptspp, GLCptspp, MALTptspp, MANGLYCptspp, MANptspp, MNLptspp, SBTptspp, SUCptspp, TREptspp
9469	-49.5361	EX_succ_e	10.8056	-10	0.0694611	4	30.0575	-13.0428	25.8624	-3.81046	8.00562	b3197, b2415, b4219, b3736	2DGLCptspp, ACGAptspp, ACMANAptspp, ACMUMptspp, ARBTptspp, ASCBptspp, ATPS4rpp, CELBpts, CHTBSptspp, DHAPT, FRUpts2pp, FRUptspp, GALTptspp, GAMptspp, GLCptspp, MALTptspp, MANGLYCptspp, MANptspp, MNLptspp, SBTptspp, SUCptspp, TREptspp
9470	-49.5361	EX_succ_e	10.8056	-10	0.0694611	4	30.0575	-13.0428	25.8624	-3.81046	8.00562	b2415, b2178, b3736, b1616	2DGLCptspp, ACGAptspp, ACMANAptspp, ACMUMptspp, ARBTptspp, ASCBptspp, ATPS4rpp, CELBpts, CHTBSptspp, DHAPT, FRUpts2pp, FRUptspp, GALTptspp, GAMptspp, GLCptspp, MALTptspp, MANGLYCptspp, MANptspp, METGLCURt2pp, MNLptspp, SBTptspp, SUCptspp, TREptspp
9471	-49.5361	EX_succ_e	10.8056	-10	0.0694611	4	30.0575	-13.0428	25.8624	-3.81046	8.00562	b2415, b1465, b3738, b2492	2DGLCptspp, ACGAptspp, ACMANAptspp, ACMUMptspp, ARBTptspp, ASCBptspp, ATPS4rpp, CELBpts, CHTBSptspp, DHAPT, FRUpts2pp, FRUptspp, GALTptspp, GAMptspp, GLCptspp, MALTptspp, MANGLYCptspp, MANptspp, MNLptspp, SBTptspp, SUCptspp, TREptspp
9472	-49.5361	EX_succ_e	10.8056	-10	0.0694611	4	30.0575	-13.0428	25.8624	-3.81046	8.00562	b0896, b2415, b3732, b2989	2DGLCptspp, ACGAptspp, ACMANAptspp, ACMUMptspp, ARBTptspp, ASCBptspp, ATPS4rpp, CELBpts, CHTBSptspp, DHAPT, DMSOR2, FRUpts2pp, FRUptspp, GALTptspp, GAMptspp, GLCptspp, MALTptspp, MANGLYCptspp, MANptspp, MNLptspp, SBTptspp, SUCptspp, TMAOR2, TREptspp
9473	-49.5361	EX_succ_e	10.8056	-10	0.0694611	4	30.0575	-13.0428	25.8624	-3.81046	8.00562	b2415, b0957, b3736, b0307	2DGLCptspp, ACGAptspp, ACMANAptspp, ACMUMptspp, ARBTptspp, ASCBptspp, ATPS4rpp, CELBpts, CHTBSptspp, DHAPT, FRUpts2pp, FRUptspp, GALTptspp, GAMptspp, GLCptspp, MALTptspp, MANGLYCptspp, MANptspp, MNLptspp, SBTptspp, SUCptspp, TREptspp
9474	-49.5361	EX_succ_e	10.8056	-10	0.0694611	4	30.0575	-13.0428	25.8624	-3.81046	8.00562	b2415, b3137, b3736, b3291	2DGLCptspp, ACGAptspp, ACMANAptspp, ACMUMptspp, ARBTptspp, ASCBptspp, ATPS4rpp, CELBpts, CHTBSptspp, DHAPT, FRUpts2pp, FRUptspp, GALTptspp, GAMptspp, GLCptspp, MALTptspp, MANGLYCptspp, MANptspp, MNLptspp, SBTptspp, SUCptspp, TREptspp
9475	-49.5361	EX_succ_e	10.8056	-10	0.0694611	4	30.0575	-13.0428	25.8624	-3.81046	8.00562	b2415, b3732, b3415, b3291	2DGLCptspp, ACGAptspp, ACMANAptspp, ACMUMptspp, ARBTptspp, ASCBptspp, ATPS4rpp, CELBpts, CHTBSptspp, DHAPT, FRUpts2pp, FRUptspp, GALTptspp, GAMptspp, GLCptspp, MALTptspp, MANGLYCptspp, MANptspp, MNLptspp, SBTptspp, SUCptspp, TREptspp
9476	-49.5361	EX_succ_e	10.8056	-10	0.0694611	4	30.0575	-13.0428	25.8624	-3.81046	8.00562	b3223, b2415, b1818, b3736	2DGLCptspp, ACGAptspp, ACMANAptspp, ACMUMptspp, AMANAPEr, ARBTptspp, ASCBptspp, ATPS4rpp, CELBpts, CHTBSptspp, DHAPT, FRUpts2pp, FRUptspp, GALTptspp, GAMptspp, GLCptspp, MALTptspp, MANGLYCptspp, MANptspp, MNLptspp, SBTptspp, SUCptspp, TREptspp
9477	-49.5361	EX_succ_e	10.8056	-10	0.0694611	4	30.0575	-13.0428	25.8624	-3.81046	8.00562	b2415, b1711, b3738, b2253	2DGLCptspp, ACGAptspp, ACMANAptspp, ACMUMptspp, ADOCBLabcpp, ARBTptspp, ASCBptspp, ATPS4rpp, CBIuabcpp, CBL1abcpp, CELBpts, CHTBSptspp, DHAPT, FRUpts2pp, FRUptspp, GALTptspp, GAMptspp, GLCptspp, MALTptspp, MANGLYCptspp, MANptspp, MNLptspp, SBTptspp, SUCptspp, TREptspp, UDPKAAT
9478	-49.5361	EX_succ_e	10.8056	-10	0.0694611	4	30.0575	-13.0428	25.8624	-3.81046	8.00562	b2458, b2415, b4374, b3738	2DGLCptspp, ACGAptspp, ACMANAptspp, ACMUMptspp, ARBTptspp, ASCBptspp, ATPS4rpp, CELBpts, CHTBSptspp, DHAPT, FRUpts2pp, FRUptspp, GALTptspp, GAMptspp, GLCptspp, MALTptspp, MANGLYCptspp, MANptspp, MNLptspp, SBTptspp, SUCptspp, TREptspp
9479	-49.5361	EX_succ_e	10.8056	-10	0.0694611	4	30.0575	-13.0428	25.8624	-3.81046	8.00562	b2415, b3137, b3736, b1621	2DGLCptspp, ACGAptspp, ACMANAptspp, ACMUMptspp, ARBTptspp, ASCBptspp, ATPS4rpp, CELBpts, CHTBSptspp, DHAPT, FRUpts2pp, FRUptspp, GALTptspp, GAMptspp, GLCptspp, MALTptspp, MANGLYCptspp, MANptspp, MNLptspp, SBTptspp, SUCptspp, TREptspp
9480	-49.5361	EX_succ_e	10.8056	-10	0.0694611	4	30.0575	-13.0428	25.8624	-3.81046	8.00562	b2415, b3600, b1465, b3736	2DGLCptspp, ACGAptspp, ACMANAptspp, ACMUMptspp, ARBTptspp, ASCBptspp, ATPS4rpp, CELBpts, CHTBSptspp, DHAPT, FRUpts2pp, FRUptspp, GALTptspp, GAMptspp, GLCptspp, M1PD, MALTptspp, MANGLYCptspp, MANptspp, MNLptspp, SBTptspp, SUCptspp, TREptspp
9481	-49.5361	EX_succ_e	10.8056	-10	0.0694611	4	30.0575	-13.0428	25.8624	-3.81046	8.00562	b3951, b2415, b3736, b4136	2DGLCptspp, ACGAptspp, ACMANAptspp, ACMUMptspp, ARBTptspp, ASCBptspp, ATPS4rpp, CELBpts, CHTBSptspp, DHAPT, DSBDR, FRUpts2pp, FRUptspp, GALTptspp, GAMptspp, GLCptspp, MALTptspp, MANGLYCptspp, MANptspp, MNLptspp, SBTptspp, SUCptspp, TDSR1, TDSR2, TREptspp
9482	-49.5361	EX_succ_e	10.8056	-10	0.0694611	4	30.0575	-13.0428	25.8624	-3.81046	8.00562	b2415, b2483, b3732, b1535	2DGLCptspp, ACGAptspp, ACMANAptspp, ACMUMptspp, ARBTptspp, ASCBptspp, ATPS4rpp, CELBpts, CHTBSptspp, DHAPT, FRUpts2pp, FRUptspp, GALTptspp, GAMptspp, GLCptspp, MALTptspp, MANGLYCptspp, MANptspp, MNLptspp, SBTptspp, SUCptspp, TREptspp
9483	-49.5361	EX_succ_e	10.8056	-10	0.0694611	4	30.0575	-13.0428	25.8624	-3.81046	8.00562	b2415, b3589, b1246, b3732	2DGLCptspp, ACGAptspp, ACMANAptspp, ACMUMptspp, ARBTptspp, ASCBptspp, ATPS4rpp, CELBpts, CHTBSptspp, DHAPT, FRUpts2pp, FRUptspp, GALTptspp, GAMptspp, GLCptspp, MALTptspp, MANGLYCptspp, MANptspp, MNLptspp, SBTptspp, SUCptspp, TREptspp
9484	-49.5361	EX_succ_e	10.8056	-10	0.0694611	4	30.0575	-13.0428	25.8624	-3.81046	8.00562	b2668, b2415, b1377, b3736	2DGLCptspp, ACGAptspp, ACMANAptspp, ACMUMptspp, ARBTptspp, ASCBptspp, ATPS4rpp, CELBpts, CHTBSptspp, DHAPT, FRUpts2pp, FRUptspp, GALTptspp, GAMptspp, GLCptspp, MALTptspp, MANGLYCptspp, MANptspp, MNLptspp, SBTptspp, SUCptspp, TREptspp
9485	-49.5361	EX_succ_e	10.8056	-10	0.0694611	4	30.0575	-13.0428	25.8624	-3.81046	8.00562	b3553, b2415, b3578, b3736	23DOGULNt4pp, 2DGLCptspp, 2DGULRGx, 2DGULRGy, 2DGULRx, 2DGULRy, ACGAptspp, ACMANAptspp, ACMUMptspp, ARBTptspp, ASCBptspp, ATPS4rpp, CELBpts, CHTBSptspp, DHAPT, DKGLCNR2x, DKGLCNR2y, FRUpts2pp, FRUptspp, GALTptspp, GAMptspp, GLCptspp, MALTptspp, MANGLYCptspp, MANptspp, MNLptspp, SBTptspp, SUCptspp, TREptspp, XYLUt2pp
9486	-49.5361	EX_succ_e	10.8056	-10	0.0694611	4	30.0575	-13.0428	25.8624	-3.81046	8.00562	b0368, b2415, b3736, b4298	2DGLCptspp, ACGAptspp, ACMANAptspp, ACMUMptspp, ARBTptspp, ASCBptspp, ATPS4rpp, CELBpts, CHTBSptspp, DHAPT, FRUpts2pp, FRUptspp, GALTptspp, GAMptspp, GLCptspp, MALTptspp, MANGLYCptspp, MANptspp, MNLptspp, SBTptspp, SUCptspp, TAUDO, TREptspp
9487	-49.5361	EX_succ_e	10.8056	-10	0.0694611	4	30.0575	-13.0428	25.8624	-3.81046	8.00562	b2415, b1524, b3736, b1991	2DGLCptspp, ACGAptspp, ACMANAptspp, ACMUMptspp, ARBTptspp, ASCBptspp, ATPS4rpp, CELBpts, CHTBSptspp, DHAPT, FRUpts2pp, FRUptspp, GALTptspp, GAMptspp, GLCptspp, MALTptspp, MANGLYCptspp, MANptspp, MNLptspp, NNDMBRT, SBTptspp, SUCptspp, TREptspp
9488	-49.5361	EX_succ_e	10.8056	-10	0.0694611	4	30.0575	-13.0428	25.8624	-3.81046	8.00562	b2415, b0066, b3739, b3732	2DGLCptspp, ACGAptspp, ACMANAptspp, ACMUMptspp, ARBTptspp, ASCBptspp, ATPS4rpp, CELBpts, CHTBSptspp, DHAPT, FRUpts2pp, FRUptspp, GALTptspp, GAMptspp, GLCptspp, MALTptspp, MANGLYCptspp, MANptspp, MNLptspp, SBTptspp, SUCptspp, THMabcpp, TREptspp
9489	-49.5361	EX_succ_e	10.8056	-10	0.0694611	4	30.0575	-13.0428	25.8624	-3.81046	8.00562	b2415, b2485, b3736, b2258	2DGLCptspp, ACGAptspp, ACMANAptspp, ACMUMptspp, ARBTptspp, ASCBptspp, ATPS4rpp, CELBpts, CHTBSptspp, DHAPT, FRUpts2pp, FRUptspp, GALTptspp, GAMptspp, GLCptspp, MALTptspp, MANGLYCptspp, MANptspp, MNLptspp, SBTptspp, SUCptspp, TREptspp, ULA4Ntppi
9490	-49.5361	EX_succ_e	10.8056	-10	0.0694611	4	30.0575	-13.0428	25.8624	-3.81046	8.00562	b2415, b0675, b3736, b1655	2DGLCptspp, ACGAptspp, ACMANAptspp, ACMUMptspp, ARBTptspp, ASCBptspp, ATPS4rpp, CELBpts, CHTBSptspp, DHAPT, FRUpts2pp, FRUptspp, GALTptspp, GAMptspp, GLCptspp, MALTptspp, MANGLYCptspp, MANptspp, MNLptspp, SBTptspp, SUCptspp, TREptspp
9491	-49.5361	EX_succ_e	10.8056	-10	0.0694611	4	30.0575	-13.0428	25.8624	-3.81046	8.00562	b0207, b2415, b3732, b0509	2DGLCptspp, ACGAptspp, ACMANAptspp, ACMUMptspp, ARBTptspp, ASCBptspp, ATPS4rpp, CELBpts, CHTBSptspp, DHAPT, FRUpts2pp, FRUptspp, GALTptspp, GAMptspp, GLCptspp, MALTptspp, MANGLYCptspp, MANptspp, MNLptspp, SBTptspp, SUCptspp, TREptspp
9492	-49.5361	EX_succ_e	10.8056	-10	0.0694611	4	30.0575	-13.0428	25.8624	-3.81046	8.00562	b2415, b3732, b2256, b4485	2DGLCptspp, ACGAptspp, ACMANAptspp, ACMUMptspp, ARBTptspp, ASCBptspp, ATPS4rpp, CELBpts, CHTBSptspp, DHAPT, FRUpts2pp, FRUptspp, GALTptspp, GAMptspp, GLCptspp, MALTptspp, MANGLYCptspp, MANptspp, MNLptspp, SBTptspp, SUCptspp, TREptspp, UPLA4FNF
9493	-49.5361	EX_succ_e	10.8056	-10	0.0694611	4	30.0575	-13.0428	25.8624	-3.81046	8.00562	b2431, b2415, b3738, b2033	2DGLCptspp, ACGAptspp, ACMANAptspp, ACMUMptspp, ARBTptspp, ASCBptspp, ATPS4rpp, CELBpts, CHTBSptspp, DHAPT, FRUpts2pp, FRUptspp, GALTptspp, GAMptspp, GLCptspp, MALTptspp, MANGLYCptspp, MANptspp, MNLptspp, O16AT, SBTptspp, SUCptspp, TREptspp
9494	-49.5361	EX_succ_e	10.8056	-10	0.0694611	4	30.0575	-13.0428	25.8624	-3.81046	8.00562	b2415, b1227, b0849, b3736	2DGLCptspp, ACGAptspp, ACMANAptspp, ACMUMptspp, ARBTptspp, ASCBptspp, ATPS4rpp, CELBpts, CHTBSptspp, DHAPT, FRUpts2pp, FRUptspp, GALTptspp, GAMptspp, GLCptspp, MALTptspp, MANGLYCptspp, MANptspp, MNLptspp, SBTptspp, SUCptspp, TREptspp
9495	-49.5361	EX_succ_e	10.8056	-10	0.0694611	4	30.0575	-13.0428	25.8624	-3.81046	8.00562	b2431, b2415, b3062, b3732	2DGLCptspp, ACGAptspp, ACMANAptspp, ACMUMptspp, ARBTptspp, ASCBptspp, ATPS4rpp, CELBpts, CHTBSptspp, DHAPT, FRUpts2pp, FRUptspp, GALTptspp, GAMptspp, GLCptspp, MALTptspp, MANGLYCptspp, MANptspp, MNLptspp, SBTptspp, SUCptspp, TARTD, TREptspp
9496	-49.5361	EX_succ_e	10.8056	-10	0.0694611	4	30.0575	-13.0428	25.8624	-3.81046	8.00562	b3713, b2415, b1227, b3738	2DGLCptspp, ACGAptspp, ACMANAptspp, ACMUMptspp, ARBTptspp, ASCBptspp, ATPS4rpp, CELBpts, CHTBSptspp, DHAPT, FRUpts2pp, FRUptspp, GALTptspp, GAMptspp, GLCptspp, MALTptspp, MANGLYCptspp, MANptspp, MNLptspp, SBTptspp, SUCptspp, TREptspp
9497	-49.5361	EX_succ_e	10.8056	-10	0.0694611	4	30.0575	-13.0428	25.8624	-3.81046	8.00562	b4390, b2415, b3732, b3748	2DGLCptspp, ACGAptspp, ACMANAptspp, ACMUMptspp, ARBTptspp, ASCBptspp, ATPS4rpp, CELBpts, CHTBSptspp, DHAPT, FRUpts2pp, FRUptspp, GALTptspp, GAMptspp, GLCptspp, MALTptspp, MANGLYCptspp, MANptspp, MNLptspp, SBTptspp, SUCptspp, TREptspp
9498	-49.5361	EX_succ_e	10.8056	-10	0.0694611	4	30.0575	-13.0428	25.8624	-3.81046	8.00562	b2415, b1247, b3736, b3894	2DGLCptspp, ACGAptspp, ACMANAptspp, ACMUMptspp, ARBTptspp, ASCBptspp, ATPS4rpp, CELBpts, CHTBSptspp, DHAPT, FRUpts2pp, FRUptspp, GALTptspp, GAMptspp, GLCptspp, MALTptspp, MANGLYCptspp, MANptspp, MNLptspp, SBTptspp, SUCptspp, TREptspp
9499	-49.5361	EX_succ_e	10.8056	-10	0.0694611	4	30.0575	-13.0428	25.8624	-3.81046	8.00562	b2415, b3709, b1778, b3732	2DGLCptspp, ACGAptspp, ACMANAptspp, ACMUMptspp, ARBTptspp, ASCBptspp, ATPS4rpp, CELBpts, CHTBSptspp, DHAPT, FRUpts2pp, FRUptspp, GALTptspp, GAMptspp, GLCptspp, MALTptspp, MANGLYCptspp, MANptspp, MNLptspp, SBTptspp, SUCptspp, TREptspp
9500	-49.5361	EX_succ_e	10.8056	-10	0.0694611	4	30.0575	-13.0428	25.8624	-3.81046	8.00562	b2168, b2415, b3732, b0842	2DGLCptspp, ACGAptspp, ACMANAptspp, ACMUMptspp, ARBTptspp, ASCBptspp, ATPS4rpp, CELBpts, CHTBSptspp, DHAPT, FRUK, FRUpts2pp, FRUptspp, GALTptspp, GAMptspp, GLCptspp, MALTptspp, MANGLYCptspp, MANptspp, MNLptspp, SBTptspp, SUCptspp, TREptspp
9501	-49.5361	EX_succ_e	10.8056	-10	0.0694611	4	30.0575	-13.0428	25.8624	-3.81046	8.00562	b2415, b2178, b4079, b3736	2DGLCptspp, ACGAptspp, ACMANAptspp, ACMUMptspp, ARBTptspp, ASCBptspp, ATPS4rpp, CELBpts, CHTBSptspp, DHAPT, FHL, FRUpts2pp, FRUptspp, GALTptspp, GAMptspp, GLCptspp, MALTptspp, MANGLYCptspp, MANptspp, MNLptspp, SBTptspp, SUCptspp, TREptspp
9502	-49.5361	EX_succ_e	10.8056	-10	0.0694611	4	30.0575	-13.0428	25.8624	-3.81046	8.00562	b2415, b3736, b1736, b2873	2DGLCptspp, ACGAptspp, ACMANAptspp, ACMUMptspp, ARBTptspp, ASCBptspp, ATPS4rpp, CELBpts, CHTBSptspp, DHAPT, FRUpts2pp, FRUptspp, GALTptspp, GAMptspp, GLCptspp, MALTptspp, MANGLYCptspp, MANptspp, MNLptspp, PHDA, SBTptspp, SUCptspp, TREptspp
9503	-49.5361	EX_succ_e	10.8056	-10	0.0694611	4	30.0575	-13.0428	25.8624	-3.81046	8.00562	b0046, b2415, b3732, b4085	2DGLCptspp, ACGAptspp, ACMANAptspp, ACMUMptspp, ALLULPE, ARBTptspp, ASCBptspp, ATPS4rpp, CELBpts, CHTBSptspp, DHAPT, FRUpts2pp, FRUptspp, GALTptspp, GAMptspp, GLCptspp, MALTptspp, MANGLYCptspp, MANptspp, MNLptspp, SBTptspp, SUCptspp, TREptspp
9504	-49.5361	EX_succ_e	10.8056	-10	0.0694611	4	30.0575	-13.0428	25.8624	-3.81046	8.00562	b3788, b2415, b3732, b1737	2DGLCptspp, ACGAptspp, ACMANAptspp, ACMUMptspp, ARBTptspp, ASCBptspp, ATPS4rpp, CELBpts, CHTBSptspp, DHAPT, FRUpts2pp, FRUptspp, GALTptspp, GAMptspp, GLCptspp, MALTptspp, MANGLYCptspp, MANptspp, MNLptspp, SBTptspp, SUCptspp, TREptspp
9505	-49.5361	EX_succ_e	10.8056	-10	0.0694611	4	30.0575	-13.0428	25.8624	-3.81046	8.00562	b0002, b2415, b3224, b3732	2DGLCptspp, ACGAptspp, ACMANAptspp, ACMUMptspp, ACNAMt2pp, ARBTptspp, ASCBptspp, ATPS4rpp, CELBpts, CHTBSptspp, DHAPT, FRUpts2pp, FRUptspp, GALTptspp, GAMptspp, GLCptspp, MALTptspp, MANGLYCptspp, MANptspp, MNLptspp, SBTptspp, SUCptspp, TREptspp
9506	-49.5361	EX_succ_e	10.8056	-10	0.0694611	4	30.0575	-13.0428	25.8624	-3.81046	8.00562	b3885, b2415, b3732, b0842	2DGLCptspp, ACGAptspp, ACMANAptspp, ACMUMptspp, ARBTptspp, ASCBptspp, ATPS4rpp, CELBpts, CHTBSptspp, DHAPT, FRUpts2pp, FRUptspp, GALTptspp, GAMptspp, GLCptspp, MALTptspp, MANGLYCptspp, MANptspp, MNLptspp, SBTptspp, SUCptspp, TREptspp
9507	-49.5361	EX_succ_e	10.8056	-10	0.0694611	4	30.0575	-13.0428	25.8624	-3.81046	8.00562	b2415, b3736, b3503, b3525	2DGLCptspp, ACGAptspp, ACMANAptspp, ACMUMptspp, ARBTptspp, ASCBptspp, ASR, ATPS4rpp, CELBpts, CHTBSptspp, DHAPT, FRUpts2pp, FRUptspp, GALTptspp, GAMptspp, GLCptspp, MALTptspp, MANGLYCptspp, MANptspp, MNLptspp, SBTptspp, SUCptspp, TREptspp
9508	-49.5361	EX_succ_e	10.8056	-10	0.0694611	4	30.0575	-13.0428	25.8624	-3.81046	8.00562	b3008, b2415, b3736, b1276	2DGLCptspp, ACGAptspp, ACMANAptspp, ACMUMptspp, ARBTptspp, ASCBptspp, ATPS4rpp, CELBpts, CHTBSptspp, DHAPT, FRUpts2pp, FRUptspp, GALTptspp, GAMptspp, GLCptspp, MALTptspp, MANGLYCptspp, MANptspp, MNLptspp, SBTptspp, SUCptspp, TREptspp
9509	-49.5361	EX_succ_e	10.8056	-10	0.0694611	4	30.0575	-13.0428	25.8624	-3.81046	8.00562	b0841, b2415, b4079, b3738	2DGLCptspp, ACGAptspp, ACMANAptspp, ACMUMptspp, ARBTptspp, ASCBptspp, ATPS4rpp, CELBpts, CHTBSptspp, DHAPT, FHL, FRUpts2pp, FRUptspp, GALTptspp, GAMptspp, GLCptspp, MALTptspp, MANGLYCptspp, MANptspp, MNLptspp, SBTptspp, SUCptspp, TREptspp
9510	-49.5361	EX_succ_e	10.8056	-10	0.0694611	4	30.0575	-13.0428	25.8624	-3.81046	8.00562	b2415, b3736, b3732, b1008	2DGLCptspp, ACGAptspp, ACMANAptspp, ACMUMptspp, ARBTptspp, ASCBptspp, ATPS4rpp, CELBpts, CHTBSptspp, DHAPT, FRUpts2pp, FRUptspp, GALTptspp, GAMptspp, GLCptspp, MALTptspp, MANGLYCptspp, MANptspp, MNLptspp, SBTptspp, SUCptspp, TREptspp
9511	-49.5361	EX_succ_e	10.8056	-10	0.0694611	4	30.0575	-13.0428	25.8624	-3.81046	8.00562	b2039, b2415, b3732, b4386	2DGLCptspp, ACGAptspp, ACMANAptspp, ACMUMptspp, ARBTptspp, ASCBptspp, ATPS4rpp, CELBpts, CHTBSptspp, DHAPT, FRUpts2pp, FRUptspp, GALTptspp, GAMptspp, GLCptspp, LIPAMPL, LIPATPT, MALTptspp, MANGLYCptspp, MANptspp, MNLptspp, OCTNLL, SBTptspp, SUCptspp, TREptspp
9512	-49.5361	EX_succ_e	10.8056	-10	0.0694611	4	30.0575	-13.0428	25.8624	-3.81046	8.00562	b2415, b3736, b4476, b3253	2DGLCptspp, ACGAptspp, ACMANAptspp, ACMUMptspp, ARBTptspp, ASCBptspp, ATPS4rpp, CELBpts, CHTBSptspp, DHAPT, FRUpts2pp, FRUptspp, GALTptspp, GAMptspp, GLCptspp, MALTptspp, MANGLYCptspp, MANptspp, MNLptspp, PCNO, SBTptspp, SUCptspp, TREptspp
9513	-49.5361	EX_succ_e	10.8056	-10	0.0694611	4	30.0575	-13.0428	25.8624	-3.81046	8.00562	b2415, b3732, b2253, b3750	2DGLCptspp, ACGAptspp, ACMANAptspp, ACMUMptspp, ARBTptspp, ASCBptspp, ATPS4rpp, CELBpts, CHTBSptspp, DHAPT, FRUpts2pp, FRUptspp, GALTptspp, GAMptspp, GLCptspp, MALTptspp, MANGLYCptspp, MANptspp, MNLptspp, SBTptspp, SUCptspp, TREptspp, UDPKAAT
9514	-49.5361	EX_succ_e	10.8056	-10	0.0694611	4	30.0575	-13.0428	25.8624	-3.81046	8.00562	b1106, b2415, b3736, b1441	2DGLCptspp, ACGAptspp, ACMANAptspp, ACMUMptspp, ARBTptspp, ASCBptspp, ATPS4rpp, CELBpts, CHTBSptspp, DHAPT, FRUpts2pp, FRUptspp, GALTptspp, GAMptspp, GLCptspp, MALTptspp, MANGLYCptspp, MANptspp, MNLptspp, SBTptspp, SUCptspp, TMK, TREptspp
9515	-49.5361	EX_succ_e	10.8056	-10	0.0694611	4	30.0575	-13.0428	25.8624	-3.81046	8.00562	b2415, b1468, b1329, b3738	2DGLCptspp, ACGAptspp, ACMANAptspp, ACMUMptspp, ARBTptspp, ASCBptspp, ATPS4rpp, CELBpts, CHTBSptspp, DHAPT, FRUpts2pp, FRUptspp, GALTptspp, GAMptspp, GLCptspp, MALTptspp, MANGLYCptspp, MANptspp, MNLptspp, SBTptspp, SUCptspp, TREptspp
9516	-49.5361	EX_succ_e	10.8056	-10	0.0694611	4	30.0575	-13.0428	25.8624	-3.81046	8.00562	b2781, b2415, b3679, b3732	2DGLCptspp, ACGAptspp, ACMANAptspp, ACMUMptspp, ARBTptspp, ASCBptspp, ATPS4rpp, CELBpts, CHTBSptspp, DHAPT, FRUpts2pp, FRUptspp, GALTptspp, GAMptspp, GLCptspp, INOSTt4pp, MALTptspp, MANGLYCptspp, MANptspp, MNLptspp, SBTptspp, SUCptspp, TREptspp
9517	-49.5361	EX_succ_e	10.8056	-10	0.0694611	4	30.0575	-13.0428	25.8624	-3.81046	8.00562	b2415, b2417, b3736, b4386	2DGLCptspp, ACGAptspp, ACMANAptspp, ACMUMptspp, ARBTptspp, ASCBptspp, ATPS4rpp, CELBpts, CHTBSptspp, DHAPT, FRUpts2pp, FRUptspp, GALTptspp, GAMptspp, GLCptspp, LIPAMPL, LIPATPT, MALTptspp, MANGLYCptspp, MANptspp, MNLptspp, OCTNLL, SBTptspp, SUCptspp, TREptspp
9518	-49.5361	EX_succ_e	10.8056	-10	0.0694611	4	30.0575	-13.0428	25.8624	-3.81046	8.00562	b2415, b3736, b0855, b1616	2DGLCptspp, ACGAptspp, ACMANAptspp, ACMUMptspp, ARBTptspp, ASCBptspp, ATPS4rpp, CELBpts, CHTBSptspp, DHAPT, FRUpts2pp, FRUptspp, GALTptspp, GAMptspp, GLCptspp, MALTptspp, MANGLYCptspp, MANptspp, METGLCURt2pp, MNLptspp, SBTptspp, SUCptspp, TREptspp
9519	-49.5361	EX_succ_e	10.8056	-10	0.0694611	4	30.0575	-13.0428	25.8624	-3.81046	8.00562	b2415, b3736, b2253, b2302	2DGLCptspp, ACGAptspp, ACMANAptspp, ACMUMptspp, ARBTptspp, ASCBptspp, ATPS4rpp, CELBpts, CHTBSptspp, DHAPT, FRUpts2pp, FRUptspp, GALTptspp, GAMptspp, GLCptspp, MALTptspp, MANGLYCptspp, MANptspp, MNLptspp, SBTptspp, SUCptspp, TREptspp, UDPKAAT
9520	-49.5361	EX_succ_e	10.8056	-10	0.0694611	4	30.0575	-13.0428	25.8624	-3.81046	8.00562	b2415, b3736, b0874, b4130	2DGLCptspp, ACGAptspp, ACMANAptspp, ACMUMptspp, ARBTptspp, ASCBptspp, ATPS4rpp, CELBpts, CHTBSptspp, DHAPT, FRUpts2pp, FRUptspp, GALTptspp, GAMptspp, GLCptspp, MALTptspp, MANGLYCptspp, MANptspp, MNLptspp, SBTptspp, SUCptspp, TREptspp
9521	-49.5361	EX_succ_e	10.8056	-10	0.0694611	4	30.0575	-13.0428	25.8624	-3.81046	8.00562	b3789, b2415, b3738, b3772	2DGLCptspp, ACGAptspp, ACMANAptspp, ACMUMptspp, ARBTptspp, ASCBptspp, ATPS4rpp, CELBpts, CHTBSptspp, DHAPT, FRUpts2pp, FRUptspp, GALTptspp, GAMptspp, GLCptspp, MALTptspp, MANGLYCptspp, MANptspp, MNLptspp, SBTptspp, SUCptspp, TREptspp
9522	-49.5361	EX_succ_e	10.8056	-10	0.0694611	4	30.0575	-13.0428	25.8624	-3.81046	8.00562	b2415, b3732, b4019, b1296	2DGLCptspp, ACGAptspp, ACMANAptspp, ACMUMptspp, ARBTptspp, ASCBptspp, ATPS4rpp, CELBpts, CHTBSptspp, DHAPT, FRUpts2pp, FRUptspp, GALTptspp, GAMptspp, GLCptspp, MALTptspp, MANGLYCptspp, MANptspp, MNLptspp, SBTptspp, SUCptspp, TREptspp
9523	-49.5361	EX_succ_e	10.8056	-10	0.0694611	4	30.0575	-13.0428	25.8624	-3.81046	8.00562	b2415, b3579, b3738, b0855	23DOGULNt4pp, 2DGLCptspp, ACGAptspp, ACMANAptspp, ACMUMptspp, ARBTptspp, ASCBptspp, ATPS4rpp, CELBpts, CHTBSptspp, DHAPT, FRUpts2pp, FRUptspp, GALTptspp, GAMptspp, GLCptspp, MALTptspp, MANGLYCptspp, MANptspp, MNLptspp, SBTptspp, SUCptspp, TREptspp, XYLUt2pp
9524	-49.5361	EX_succ_e	10.8056	-10	0.0694611	4	30.0575	-13.0428	25.8624	-3.81046	8.00562	b3426, b2415, b3732, b0444	2DGLCptspp, ACGAptspp, ACMANAptspp, ACMUMptspp, ARBTptspp, ASCBptspp, ATPS4rpp, CCGS, CELBpts, CHTBSptspp, DHAPT, FRUpts2pp, FRUptspp, GALTptspp, GAMptspp, GLCptspp, MALTptspp, MANGLYCptspp, MANptspp, MNLptspp, SBTptspp, SUCptspp, TREptspp
9525	-49.5361	EX_succ_e	10.8056	-10	0.0694611	4	30.0575	-13.0428	25.8624	-3.81046	8.00562	b2415, b0273, b1270, b3736	2DGLCptspp, ACGAptspp, ACMANAptspp, ACMUMptspp, ARBTptspp, ASCBptspp, ATPS4rpp, CBIAT, CBLAT, CELBpts, CHTBSptspp, DHAPT, FRUpts2pp, FRUptspp, GALTptspp, GAMptspp, GLCptspp, MALTptspp, MANGLYCptspp, MANptspp, MNLptspp, SBTptspp, SUCptspp, TREptspp
9526	-49.5361	EX_succ_e	10.8056	-10	0.0694611	4	30.0575	-13.0428	25.8624	-3.81046	8.00562	b2415, b3551, b0862, b3736	2DGLCptspp, ACGAptspp, ACMANAptspp, ACMUMptspp, ARBTptspp, ASCBptspp, ATPS4rpp, BSORx, BSORy, CELBpts, CHTBSptspp, DHAPT, FRUpts2pp, FRUptspp, GALTptspp, GAMptspp, GLCptspp, MALTptspp, MANGLYCptspp, MANptspp, MNLptspp, SBTptspp, SUCptspp, TREptspp
9527	-49.5361	EX_succ_e	10.8056	-10	0.0694611	4	30.0575	-13.0428	25.8624	-3.81046	8.00562	b2415, b3736, b0376, b1655	2DGLCptspp, ACGAptspp, ACMANAptspp, ACMUMptspp, ARBTptspp, ASCBptspp, ATPS4rpp, CELBpts, CHTBSptspp, DHAPT, FRUpts2pp, FRUptspp, GALTptspp, GAMptspp, GLCptspp, MALTptspp, MANGLYCptspp, MANptspp, MNLptspp, SBTptspp, SUCptspp, TREptspp
9528	-49.5361	EX_succ_e	10.8056	-10	0.0694611	4	30.0575	-13.0428	25.8624	-3.81046	8.00562	b2415, b3736, b0336, b0047	2DGLCptspp, ACGAptspp, ACMANAptspp, ACMUMptspp, ARBTptspp, ASCBptspp, ATPS4rpp, CELBpts, CHTBSptspp, CSNt2pp, DHAPT, FRUpts2pp, FRUptspp, GALTptspp, GAMptspp, GLCptspp, MALTptspp, MANGLYCptspp, MANptspp, MNLptspp, SBTptspp, SUCptspp, TREptspp
9529	-49.5361	EX_succ_e	10.8056	-10	0.0694611	4	30.0575	-13.0428	25.8624	-3.81046	8.00562	b2053, b2415, b3738, b3877	2DGLCptspp, ACGAptspp, ACMANAptspp, ACMUMptspp, ARBTptspp, ASCBptspp, ATPS4rpp, CELBpts, CHTBSptspp, DHAPT, DHPStr, FRUpts2pp, FRUptspp, GALTptspp, GAMptspp, GLCptspp, GMAND, MALTptspp, MANGLYCptspp, MANptspp, MNLptspp, SBTptspp, SUCptspp, TREptspp
9530	-49.5361	EX_succ_e	10.8056	-10	0.0694611	4	30.0575	-13.0428	25.8624	-3.81046	8.00562	b2415, b3736, b2255, b1801	2DGLCptspp, ACGAptspp, ACMANAptspp, ACMUMptspp, ARBTptspp, ASCBptspp, ATPS4rpp, CELBpts, CHTBSptspp, DHAPT, FRUpts2pp, FRUptspp, GALTptspp, GAMptspp, GLCptspp, MALTptspp, MANGLYCptspp, MANptspp, MNLptspp, SBTptspp, SUCptspp, TREptspp, UDPGDC, ULA4NFT
9531	-49.5361	EX_succ_e	10.8056	-10	0.0694611	4	30.0575	-13.0428	25.8624	-3.81046	8.00562	b4269, b2415, b3736, b4093	2DGLCptspp, ACGAptspp, ACMANAptspp, ACMUMptspp, AMPNTAT, ARBTptspp, ASCBptspp, ATPS4rpp, CELBpts, CHTBSptspp, DHAPT, FRUpts2pp, FRUptspp, GALTptspp, GAMptspp, GLCptspp, MALTptspp, MANGLYCptspp, MANptspp, MNLptspp, SBTptspp, SUCptspp, TREptspp
9532	-49.5361	EX_succ_e	10.8056	-10	0.0694611	4	30.0575	-13.0428	25.8624	-3.81046	8.00562	b2415, b3568, b3736, b2247	2DGLCptspp, ACGAptspp, ACMANAptspp, ACMUMptspp, ARBTptspp, ASCBptspp, ATPS4rpp, CELBpts, CHTBSptspp, DHAPT, FRUpts2pp, FRUptspp, GALTptspp, GAMptspp, GLCptspp, MALTptspp, MANGLYCptspp, MANptspp, MNLptspp, RHMND, SBTptspp, SUCptspp, TREptspp, XYLabcpp
9533	-49.5361	EX_succ_e	10.8056	-10	0.0694611	4	30.0575	-13.0428	25.8624	-3.81046	8.00562	b3475, b2415, b2485, b3736	2DGLCptspp, ACGAptspp, ACMANAptspp, ACMUMptspp, ARBTptspp, ASCBptspp, ATPS4rpp, CELBpts, CHTBSptspp, DHAPT, FRUpts2pp, FRUptspp, GALTptspp, GAMptspp, GLCptspp, MALTptspp, MANGLYCptspp, MANptspp, MNLptspp, SBTptspp, SUCptspp, TREptspp
9534	-49.5361	EX_succ_e	10.8056	-10	0.0694611	4	30.0575	-13.0428	25.8624	-3.81046	8.00562	b2415, b1701, b3732, b1022	2DGLCptspp, ACGAptspp, ACMANAptspp, ACMUMptspp, ARBTptspp, ASCBptspp, ATPS4rpp, CELBpts, CHTBSptspp, DHAPT, FRUpts2pp, FRUptspp, GALTptspp, GAMptspp, GLCptspp, MALTptspp, MANGLYCptspp, MANptspp, MNLptspp, PUACGAMS, PUACGAMtr, SBTptspp, SUCptspp, TREptspp
9535	-49.5361	EX_succ_e	10.8056	-10	0.0694611	4	30.0575	-13.0428	25.8624	-3.81046	8.00562	b2415, b3736, b3772, b1430	2DGLCptspp, ACGAptspp, ACMANAptspp, ACMUMptspp, ARBTptspp, ASCBptspp, ATPS4rpp, CELBpts, CHTBSptspp, DHAPT, FRUpts2pp, FRUptspp, GALTptspp, GAMptspp, GLCptspp, MALTptspp, MANGLYCptspp, MANptspp, MNLptspp, SBTptspp, SUCptspp, TEO2M, TREptspp
9536	-49.5361	EX_succ_e	10.8056	-10	0.0694611	4	30.0575	-13.0428	25.8624	-3.81046	8.00562	b2415, b3736, b2430, b3856	2DGLCptspp, ACGAptspp, ACMANAptspp, ACMUMptspp, ARBTptspp, ASCBptspp, ATPS4rpp, CELBpts, CHTBSptspp, DHAPT, FRUpts2pp, FRUptspp, GALTptspp, GAMptspp, GLCptspp, MALTptspp, MANGLYCptspp, MANptspp, MNLptspp, SBTptspp, SUCptspp, TREptspp
9537	-49.5361	EX_succ_e	10.8056	-10	0.0694611	4	30.0575	-13.0428	25.8624	-3.81046	8.00562	b2415, b3738, b3737, b1487	2DGLCptspp, ACGAptspp, ACMANAptspp, ACMUMptspp, ARBTptspp, ASCBptspp, ATPS4rpp, CELBpts, CHTBSptspp, DHAPT, FRUpts2pp, FRUptspp, GALTptspp, GAMptspp, GLCptspp, MALTptspp, MANGLYCptspp, MANptspp, MNLptspp, SBTptspp, SUCptspp, TREptspp
9538	-49.5361	EX_succ_e	10.8056	-10	0.0694611	4	30.0575	-13.0428	25.8624	-3.81046	8.00562	b2415, b3736, b0307, b0268	2DGLCptspp, ACGAptspp, ACMANAptspp, ACMUMptspp, ARBTptspp, ASCBptspp, ATPS4rpp, CELBpts, CHTBSptspp, DHAPT, FRUpts2pp, FRUptspp, GALTptspp, GAMptspp, GLCptspp, MALTptspp, MANGLYCptspp, MANptspp, MNLptspp, SBTptspp, SUCptspp, TREptspp
9539	-49.5361	EX_succ_e	10.8056	-10	0.0694611	4	30.0575	-13.0428	25.8624	-3.81046	8.00562	b0046, b2415, b3736, b3599	2DGLCptspp, ACGAptspp, ACMANAptspp, ACMUMptspp, ARBTptspp, ASCBptspp, ATPS4rpp, CELBpts, CHTBSptspp, DHAPT, FRUpts2pp, FRUptspp, GALTptspp, GAMptspp, GLCptspp, MALTptspp, MANGLYCptspp, MANptspp, MNLptspp, SBTptspp, SUCptspp, TREptspp
9540	-49.5361	EX_succ_e	10.8056	-10	0.0694611	4	30.0575	-13.0428	25.8624	-3.81046	8.00562	b2415, b3732, b2258, b1490	2DGLCptspp, ACGAptspp, ACMANAptspp, ACMUMptspp, ARBTptspp, ASCBptspp, ATPS4rpp, CELBpts, CHTBSptspp, DHAPT, FRUpts2pp, FRUptspp, GALTptspp, GAMptspp, GLCptspp, MALTptspp, MANGLYCptspp, MANptspp, MNLptspp, SBTptspp, SUCptspp, TREptspp, ULA4Ntppi
9541	-49.5361	EX_succ_e	10.8056	-10	0.0694611	4	30.0575	-13.0428	25.8624	-3.81046	8.00562	b3222, b2415, b3736, b2303	2DGLCptspp, ACGAptspp, ACMANAptspp, ACMUMptspp, AMANK, ARBTptspp, ASCBptspp, ATPS4rpp, CELBpts, CHTBSptspp, DHAPT, DHPTPE, FRUpts2pp, FRUptspp, GALTptspp, GAMptspp, GLCptspp, MALTptspp, MANGLYCptspp, MANptspp, MNLptspp, SBTptspp, SUCptspp, TREptspp
9542	-49.5361	EX_succ_e	10.8056	-10	0.0694611	4	30.0575	-13.0428	25.8624	-3.81046	8.00562	b2415, b3736, b4087, b2256	2DGLCptspp, ACGAptspp, ACMANAptspp, ACMUMptspp, ALLabcpp, ARBTptspp, ASCBptspp, ATPS4rpp, CELBpts, CHTBSptspp, DHAPT, FRUpts2pp, FRUptspp, GALTptspp, GAMptspp, GLCptspp, MALTptspp, MANGLYCptspp, MANptspp, MNLptspp, SBTptspp, SUCptspp, TREptspp, UPLA4FNF
9543	-49.5361	EX_succ_e	10.8056	-10	0.0694611	4	30.0575	-13.0428	25.8624	-3.81046	8.00562	b2415, b1224, b3732, b3734	2DGLCptspp, ACGAptspp, ACMANAptspp, ACMUMptspp, ARBTptspp, ASCBptspp, ATPS4rpp, CELBpts, CHTBSptspp, DHAPT, FRUpts2pp, FRUptspp, GALTptspp, GAMptspp, GLCptspp, MALTptspp, MANGLYCptspp, MANptspp, MNLptspp, SBTptspp, SUCptspp, TREptspp
9544	-49.5361	EX_succ_e	10.8056	-10	0.0694611	4	30.0575	-13.0428	25.8624	-3.81046	8.00562	b2415, b2976, b3732, b0622	2DGLCptspp, ACGAptspp, ACMANAptspp, ACMUMptspp, ARBTptspp, ASCBptspp, ATPS4rpp, CELBpts, CHTBSptspp, DHAPT, FRUpts2pp, FRUptspp, GALTptspp, GAMptspp, GLCptspp, LIPAHT2ex, LIPAHTex, MALTptspp, MANGLYCptspp, MANptspp, MNLptspp, SBTptspp, SUCptspp, TREptspp
9545	-49.5361	EX_succ_e	10.8056	-10	0.0694611	4	30.0575	-13.0428	25.8624	-3.81046	8.00562	b2415, b1197, b3736, b4231	2DGLCptspp, ACGAptspp, ACMANAptspp, ACMUMptspp, ARBTptspp, ASCBptspp, ATPS4rpp, CELBpts, CHTBSptspp, DHAPT, FRUpts2pp, FRUptspp, GALTptspp, GAMptspp, GLCptspp, MALTptspp, MANGLYCptspp, MANptspp, MNLptspp, SBTptspp, SUCptspp, TREHpp, TREptspp
9546	-49.5361	EX_succ_e	10.8056	-10	0.0694611	4	30.0575	-13.0428	25.8624	-3.81046	8.00562	b3399, b2415, b4014, b3732	2DGLCptspp, ACGAptspp, ACMANAptspp, ACMUMptspp, ARBTptspp, ASCBptspp, ATPS4rpp, CELBpts, CHTBSptspp, DHAPT, FRUpts2pp, FRUptspp, GALTptspp, GAMptspp, GLCptspp, MALTptspp, MANGLYCptspp, MANptspp, MNLptspp, SBTptspp, SUCptspp, TREptspp
9547	-49.5361	EX_succ_e	10.8056	-10	0.0694611	4	30.0575	-13.0428	25.8624	-3.81046	8.00562	b1588, b2415, b3736, b1485	2DGLCptspp, ACGAptspp, ACMANAptspp, ACMUMptspp, ARBTptspp, ASCBptspp, ATPS4rpp, CELBpts, CHTBSptspp, DHAPT, FRUpts2pp, FRUptspp, GALTptspp, GAMptspp, GLCptspp, MALTptspp, MANGLYCptspp, MANptspp, MNLptspp, SBTptspp, SELR, SUCptspp, TREptspp
9548	-49.5361	EX_succ_e	10.8056	-10	0.0694611	4	30.0575	-13.0428	25.8624	-3.81046	8.00562	b2415, b0996, b3736, b2167	2DGLCptspp, ACGAptspp, ACMANAptspp, ACMUMptspp, ARBTptspp, ASCBptspp, ATPS4rpp, CELBpts, CHTBSptspp, DHAPT, FRUpts2pp, FRUptspp, GALTptspp, GAMptspp, GLCptspp, MALTptspp, MANGLYCptspp, MANptspp, MNLptspp, SBTptspp, SUCptspp, TREptspp
9549	-49.5361	EX_succ_e	10.8056	-10	0.0694611	4	30.0575	-13.0428	25.8624	-3.81046	8.00562	b1588, b2415, b3732, b1097	2DGLCptspp, ACGAptspp, ACMANAptspp, ACMUMptspp, ARBTptspp, ASCBptspp, ATPS4rpp, CELBpts, CHTBSptspp, DHAPT, FRUpts2pp, FRUptspp, GALTptspp, GAMptspp, GLCptspp, MALTptspp, MANGLYCptspp, MANptspp, MNLptspp, SBTptspp, SELR, SUCptspp, TREptspp
9550	-49.5361	EX_succ_e	10.8056	-10	0.0694611	4	30.0575	-13.0428	25.8624	-3.81046	8.00562	b2415, b2177, b3736, b4106	2DGLCptspp, ACGAptspp, ACMANAptspp, ACMUMptspp, ARBTptspp, ASCBptspp, ATPS4rpp, CELBpts, CHTBSptspp, DHAPT, FRUpts2pp, FRUptspp, GALTptspp, GAMptspp, GLCptspp, MALTptspp, MANGLYCptspp, MANptspp, MEPNabcpp, MNLptspp, SBTptspp, SUCptspp, TREptspp
9551	-49.5361	EX_succ_e	10.8056	-10	0.0694611	4	30.0575	-13.0428	25.8624	-3.81046	8.00562	b1478, b2415, b3736, b1794	2DGLCptspp, ACGAptspp, ACMANAptspp, ACMUMptspp, ARBTptspp, ASCBptspp, ATPS4rpp, CELBpts, CHTBSptspp, DHAPT, FRUpts2pp, FRUptspp, GALTptspp, GAMptspp, GLCptspp, MALTptspp, MANGLYCptspp, MANptspp, MNLptspp, SBTptspp, SUCptspp, TREptspp
9552	-49.5361	EX_succ_e	10.8056	-10	0.0694611	4	30.0575	-13.0428	25.8624	-3.81046	8.00562	b1656, b2415, b3736, b1519	2DGLCptspp, ACGAptspp, ACMANAptspp, ACMUMptspp, ACONMT, ARBTptspp, ASCBptspp, ATPS4rpp, CELBpts, CHTBSptspp, DHAPT, FRUpts2pp, FRUptspp, GALTptspp, GAMptspp, GLCptspp, MALTptspp, MANGLYCptspp, MANptspp, MNLptspp, SBTptspp, SUCptspp, TREptspp
9553	-49.5361	EX_succ_e	10.8056	-10	0.0694611	4	30.0575	-13.0428	25.8624	-3.81046	8.00562	b1588, b2415, b2484, b3736	2DGLCptspp, ACGAptspp, ACMANAptspp, ACMUMptspp, ARBTptspp, ASCBptspp, ATPS4rpp, CELBpts, CHTBSptspp, DHAPT, FRUpts2pp, FRUptspp, GALTptspp, GAMptspp, GLCptspp, MALTptspp, MANGLYCptspp, MANptspp, MNLptspp, SBTptspp, SELR, SUCptspp, TREptspp
9554	-49.5361	EX_succ_e	10.8056	-10	0.0694611	4	30.0575	-13.0428	25.8624	-3.81046	8.00562	b4039, b2415, b3385, b3738	2DGLCptspp, ACGAptspp, ACMANAptspp, ACMUMptspp, ARBTptspp, ASCBptspp, ATPS4rpp, CELBpts, CHTBSptspp, DHAPT, FRUpts2pp, FRUptspp, GALTptspp, GAMptspp, GLCptspp, MALTptspp, MANGLYCptspp, MANptspp, MNLptspp, PGLYCP, SBTptspp, SUCptspp, TREptspp
9555	-49.5361	EX_succ_e	10.8056	-10	0.0694611	4	30.0575	-13.0428	25.8624	-3.81046	8.00562	b2415, b3736, b4084, b0070	2DGLCptspp, ACGAptspp, ACMANAptspp, ACMUMptspp, ALLK, ARBTptspp, ASCBptspp, ATPS4rpp, CELBpts, CHTBSptspp, DHAPT, FRUpts2pp, FRUptspp, GALTptspp, GAMptspp, GLCptspp, MALTptspp, MANGLYCptspp, MANptspp, MNLptspp, SBTptspp, SUCptspp, TREptspp
9556	-49.5361	EX_succ_e	10.8056	-10	0.0694611	4	30.0575	-13.0428	25.8624	-3.81046	8.00562	b3996, b2415, b3736, b3390	2DGLCptspp, ACGAptspp, ACMANAptspp, ACMUMptspp, ARBTptspp, ASCBptspp, ATPS4rpp, CELBpts, CHTBSptspp, DHAPT, FRUpts2pp, FRUptspp, GALTptspp, GAMptspp, GLCptspp, MALTptspp, MANGLYCptspp, MANptspp, MNLptspp, SBTptspp, SUCptspp, TREptspp
9557	-49.5361	EX_succ_e	10.8056	-10	0.0694611	4	30.0575	-13.0428	25.8624	-3.81046	8.00562	b2415, b4240, b3738, b1617	2DGLCptspp, ACGAptspp, ACMANAptspp, ACMUMptspp, ARBTptspp, ASCBptspp, ATPS4rpp, CELBpts, CHTBSptspp, DHAPT, FRUpts2pp, FRUptspp, GALTptspp, GAMptspp, GLCptspp, MALTptspp, MANGLYCptspp, MANptspp, METGLCUR, MNLptspp, SBTptspp, SUCptspp, TREptspp
9558	-49.5361	EX_succ_e	10.8056	-10	0.0694611	4	30.0575	-13.0428	25.8624	-3.81046	8.00562	b2415, b3736, b3732, b1443	2DGLCptspp, ACGAptspp, ACMANAptspp, ACMUMptspp, ARBTptspp, ASCBptspp, ATPS4rpp, CELBpts, CHTBSptspp, DHAPT, FRUpts2pp, FRUptspp, GALTptspp, GAMptspp, GLCptspp, MALTptspp, MANGLYCptspp, MANptspp, MNLptspp, SBTptspp, SUCptspp, TREptspp
9559	-49.5361	EX_succ_e	10.8056	-10	0.0694611	4	30.0575	-13.0428	25.8624	-3.81046	8.00562	b2415, b1761, b3732, b0805	2DGLCptspp, ACGAptspp, ACMANAptspp, ACMUMptspp, ARBTptspp, ASCBptspp, ATPS4rpp, CELBpts, CHTBSptspp, DHAPT, FRUpts2pp, FRUptspp, GALTptspp, GAMptspp, GLCptspp, MALTptspp, MANGLYCptspp, MANptspp, MNLptspp, SBTptspp, SUCptspp, TREptspp
9560	-49.5361	EX_succ_e	10.8056	-10	0.0694611	4	30.0575	-13.0428	25.8624	-3.81046	8.00562	b1993, b2415, b2417, b3736	2DGLCptspp, ACBIPGT, ACGAptspp, ACMANAptspp, ACMUMptspp, ADOCBIK, ARBTptspp, ASCBptspp, ATPS4rpp, CELBpts, CHTBSptspp, DHAPT, FRUpts2pp, FRUptspp, GALTptspp, GAMptspp, GLCptspp, MALTptspp, MANGLYCptspp, MANptspp, MNLptspp, SBTptspp, SUCptspp, TREptspp
9561	-49.5361	EX_succ_e	10.8056	-10	0.0694611	4	30.0575	-13.0428	25.8624	-3.81046	8.00562	b2415, b1814, b3736, b0789	2DGLCptspp, ACGAptspp, ACMANAptspp, ACMUMptspp, ARBTptspp, ASCBptspp, ATPS4rpp, CELBpts, CHTBSptspp, DHAPT, FRUpts2pp, FRUptspp, GALTptspp, GAMptspp, GLCptspp, MALTptspp, MANGLYCptspp, MANptspp, MNLptspp, SBTptspp, SUCptspp, TREptspp
9562	-49.5361	EX_succ_e	10.8056	-10	0.0694611	4	30.0575	-13.0428	25.8624	-3.81046	8.00562	b2668, b2415, b3736, b1661	2DGLCptspp, ACGAptspp, ACMANAptspp, ACMUMptspp, ARBTptspp, ASCBptspp, ATPS4rpp, CELBpts, CFAS160E, CFAS160G, CFAS180E, CFAS180G, CHTBSptspp, DHAPT, FRUpts2pp, FRUptspp, GALTptspp, GAMptspp, GLCptspp, MALTptspp, MANGLYCptspp, MANptspp, MNLptspp, SBTptspp, SUCptspp, TREptspp
9563	-49.5361	EX_succ_e	10.8056	-10	0.0694611	4	30.0575	-13.0428	25.8624	-3.81046	8.00562	b2415, b3736, b3714, b3748	2DGLCptspp, ACGAptspp, ACMANAptspp, ACMUMptspp, ARBTptspp, ASCBptspp, ATPS4rpp, CELBpts, CHTBSptspp, DHAPT, FRUpts2pp, FRUptspp, GALTptspp, GAMptspp, GLCptspp, MALTptspp, MANGLYCptspp, MANptspp, MNLptspp, SBTptspp, SUCptspp, TREptspp
9564	-49.5361	EX_succ_e	10.8056	-10	0.0694611	4	30.0575	-13.0428	25.8624	-3.81046	8.00562	b2415, b4195, b3736, b1330	2DGLCptspp, ACGAptspp, ACMANAptspp, ACMUMptspp, ARBTptspp, ASCBptspp, ATPS4rpp, CELBpts, CHTBSptspp, DHAPT, FRUpts2pp, FRUptspp, GALTptspp, GAMptspp, GLCptspp, MALTptspp, MANGLYCptspp, MANptspp, MNLptspp, SBTptspp, SUCptspp, TREptspp
9565	-49.5361	EX_succ_e	10.8056	-10	0.0694611	4	30.0575	-13.0428	25.8624	-3.81046	8.00562	b2415, b0573, b3736, b2965	2DGLCptspp, ACGAptspp, ACMANAptspp, ACMUMptspp, AGt3, ARBTptspp, ASCBptspp, ATPS4rpp, CELBpts, CHTBSptspp, CUt3, DHAPT, FRUpts2pp, FRUptspp, GALTptspp, GAMptspp, GLCptspp, MALTptspp, MANGLYCptspp, MANptspp, MNLptspp, SBTptspp, SUCptspp, TREptspp
9566	-49.5361	EX_succ_e	10.8056	-10	0.0694611	4	30.0575	-13.0428	25.8624	-3.81046	8.00562	b2415, b3732, b3772, b4033	14GLUCANabcpp, 2DGLCptspp, ACGAptspp, ACMANAptspp, ACMUMptspp, ARBTptspp, ASCBptspp, ATPS4rpp, CELBpts, CHTBSptspp, DHAPT, FRUpts2pp, FRUptspp, GALTptspp, GAMptspp, GLCptspp, MALTHXabcpp, MALTPTabcpp, MALTTRabcpp, MALTTTRabcpp, MALTabcpp, MALTptspp, MANGLYCptspp, MANptspp, MNLptspp, SBTptspp, SUCptspp, TREptspp
9567	-49.5361	EX_succ_e	10.8056	-10	0.0694611	4	30.0575	-13.0428	25.8624	-3.81046	8.00562	b2415, b0365, b3732, b4358	2DGLCptspp, ACGAptspp, ACMANAptspp, ACMUMptspp, ARBTptspp, ASCBptspp, ATPS4rpp, CELBpts, CHTBSptspp, DHAPT, FRUpts2pp, FRUptspp, GALCTLO, GALTptspp, GAMptspp, GLCptspp, MALTptspp, MANGLYCptspp, MANptspp, MNLptspp, SBTptspp, SUCptspp, TAURabcpp, TREptspp
9568	-49.5361	EX_succ_e	10.8056	-10	0.0694611	4	30.0575	-13.0428	25.8624	-3.81046	8.00562	b2415, b2487, b3736, b3715	2DGLCptspp, ACGAptspp, ACMANAptspp, ACMUMptspp, ARBTptspp, ASCBptspp, ATPS4rpp, CELBpts, CHTBSptspp, DHAPT, FRUpts2pp, FRUptspp, GALTptspp, GAMptspp, GLCptspp, MALTptspp, MANGLYCptspp, MANptspp, MNLptspp, SBTptspp, SUCptspp, TREptspp
9569	-49.5361	EX_succ_e	10.8056	-10	0.0694611	4	30.0575	-13.0428	25.8624	-3.81046	8.00562	b0008, b2415, b4254, b3732	2DGLCptspp, ACGAptspp, ACMANAptspp, ACMUMptspp, ARBTptspp, ASCBptspp, ATPS4rpp, CELBpts, CHTBSptspp, DHAPT, FRUpts2pp, FRUptspp, GALTptspp, GAMptspp, GLCptspp, MALTptspp, MANGLYCptspp, MANptspp, MNLptspp, SBTptspp, SUCptspp, TREptspp
9570	-49.5361	EX_succ_e	10.8056	-10	0.0694611	4	30.0575	-13.0428	25.8624	-3.81046	8.00562	b2415, b4169, b4193, b3736	2DGLCptspp, ACGAptspp, ACMANAptspp, ACMUMptspp, ARBTptspp, ASCBptspp, ATPS4rpp, CELBpts, CHTBSptspp, DHAPT, FRUpts2pp, FRUptspp, GALTptspp, GAMptspp, GLCptspp, MALTptspp, MANGLYCptspp, MANptspp, MNLptspp, SBTptspp, SUCptspp, TREptspp
9571	-49.5361	EX_succ_e	10.8056	-10	0.0694611	4	30.0575	-13.0428	25.8624	-3.81046	8.00562	b2781, b2415, b4240, b3732	2DGLCptspp, ACGAptspp, ACMANAptspp, ACMUMptspp, ARBTptspp, ASCBptspp, ATPS4rpp, CELBpts, CHTBSptspp, DHAPT, FRUpts2pp, FRUptspp, GALTptspp, GAMptspp, GLCptspp, MALTptspp, MANGLYCptspp, MANptspp, MNLptspp, SBTptspp, SUCptspp, TREptspp
9572	-49.5361	EX_succ_e	10.8056	-10	0.0694611	4	30.0575	-13.0428	25.8624	-3.81046	8.00562	b2415, b4055, b3736, b2924	2DGLCptspp, ACGAptspp, ACMANAptspp, ACMUMptspp, ARBTptspp, ASCBptspp, ATPS4rpp, CELBpts, CHTBSptspp, DHAPT, FRUpts2pp, FRUptspp, GALTptspp, GAMptspp, GLCptspp, MALTptspp, MANGLYCptspp, MANptspp, MNLptspp, SBTptspp, SUCptspp, TREptspp, TYRPpp
9573	-49.5361	EX_succ_e	10.8056	-10	0.0694611	4	30.0575	-13.0428	25.8624	-3.81046	8.00562	b2415, b3732, b3612, b2796	2DGLCptspp, ACGAptspp, ACMANAptspp, ACMUMptspp, ARBTptspp, ASCBptspp, ATPS4rpp, CELBpts, CHTBSptspp, DHAPT, FRUpts2pp, FRUptspp, GALTptspp, GAMptspp, GLCptspp, MALTptspp, MANGLYCptspp, MANptspp, MNLptspp, SBTptspp, SUCptspp, TREptspp
9574	-49.5361	EX_succ_e	10.8056	-10	0.0694611	4	30.0575	-13.0428	25.8624	-3.81046	8.00562	b2415, b2291, b1584, b3732	2DGLCptspp, ACGAptspp, ACMANAptspp, ACMUMptspp, ARBTptspp, ASCBptspp, ATPS4rpp, CELBpts, CHTBSptspp, DHAPT, FRUpts2pp, FRUptspp, GALTptspp, GAMptspp, GLCptspp, MALTptspp, MANGLYCptspp, MANptspp, MNLptspp, SBTptspp, SPMDAT1, SPMDAT2, SUCptspp, TREptspp
9575	-49.5361	EX_succ_e	10.8056	-10	0.0694611	4	30.0575	-13.0428	25.8624	-3.81046	8.00562	b2415, b1467, b3736, b2302	2DGLCptspp, ACGAptspp, ACMANAptspp, ACMUMptspp, ARBTptspp, ASCBptspp, ATPS4rpp, CELBpts, CHTBSptspp, DHAPT, FRUpts2pp, FRUptspp, GALTptspp, GAMptspp, GLCptspp, MALTptspp, MANGLYCptspp, MANptspp, MNLptspp, SBTptspp, SUCptspp, TREptspp
9576	-49.5361	EX_succ_e	10.8056	-10	0.0694611	4	30.0575	-13.0428	25.8624	-3.81046	8.00562	b2415, b2918, b3736, b3881	2DGLCptspp, 6D6SPA, ACGAptspp, ACMANAptspp, ACMUMptspp, ARBTptspp, ASCBptspp, ATPS4rpp, CELBpts, CHTBSptspp, DHAPT, FRUpts2pp, FRUptspp, GALTptspp, GAMptspp, GLCptspp, MALTptspp, MANGLYCptspp, MANptspp, MNLptspp, SBTptspp, SUCptspp, TREptspp
9577	-49.5361	EX_succ_e	10.8056	-10	0.0694611	4	30.0575	-13.0428	25.8624	-3.81046	8.00562	b2415, b2976, b3738, b4130	2DGLCptspp, ACGAptspp, ACMANAptspp, ACMUMptspp, ARBTptspp, ASCBptspp, ATPS4rpp, CELBpts, CHTBSptspp, DHAPT, FRUpts2pp, FRUptspp, GALTptspp, GAMptspp, GLCptspp, MALTptspp, MANGLYCptspp, MANptspp, MNLptspp, SBTptspp, SUCptspp, TREptspp
9578	-49.5361	EX_succ_e	10.8056	-10	0.0694611	4	30.0575	-13.0428	25.8624	-3.81046	8.00562	b2415, b3732, b2995, b1008	2DGLCptspp, ACGAptspp, ACMANAptspp, ACMUMptspp, ARBTptspp, ASCBptspp, ATPS4rpp, CELBpts, CHTBSptspp, DHAPT, FRUpts2pp, FRUptspp, GALTptspp, GAMptspp, GLCptspp, MALTptspp, MANGLYCptspp, MANptspp, MNLptspp, SBTptspp, SUCptspp, TREptspp
9579	-49.5361	EX_succ_e	10.8056	-10	0.0694611	4	30.0575	-13.0428	25.8624	-3.81046	8.00562	b2415, b1270, b3738, b1249	2DGLCptspp, ACGAptspp, ACMANAptspp, ACMUMptspp, ARBTptspp, ASCBptspp, ATPS4rpp, CBIAT, CBLAT, CELBpts, CHTBSptspp, DHAPT, FRUpts2pp, FRUptspp, GALTptspp, GAMptspp, GLCptspp, MALTptspp, MANGLYCptspp, MANptspp, MNLptspp, SBTptspp, SUCptspp, TREptspp
9580	-49.5361	EX_succ_e	10.8056	-10	0.0694611	4	30.0575	-13.0428	25.8624	-3.81046	8.00562	b2415, b3568, b2523, b3738	2DGLCptspp, ACGAptspp, ACMANAptspp, ACMUMptspp, ARBTptspp, ASCBptspp, ATPS4rpp, CELBpts, CHTBSptspp, DHAPT, FRUpts2pp, FRUptspp, GALTptspp, GAMptspp, GLCptspp, MALTptspp, MANGLYCptspp, MANptspp, MNLptspp, SBTptspp, SUCptspp, TREptspp, XYLabcpp
9581	-49.5361	EX_succ_e	10.8056	-10	0.0694611	4	30.0575	-13.0428	25.8624	-3.81046	8.00562	b3114, b2415, b3738, b2302	2DGLCptspp, ACGAptspp, ACMANAptspp, ACMUMptspp, ARBTptspp, ASCBptspp, ATPS4rpp, CELBpts, CHTBSptspp, DHAPT, FRUpts2pp, FRUptspp, GALTptspp, GAMptspp, GLCptspp, MALTptspp, MANGLYCptspp, MANptspp, MNLptspp, SBTptspp, SUCptspp, TREptspp
9582	-49.5361	EX_succ_e	10.8056	-10	0.0694611	4	30.0575	-13.0428	25.8624	-3.81046	8.00562	b2415, b2180, b3732, b1738	2DGLCptspp, ACGAptspp, ACMANAptspp, ACMUMptspp, ARBTptspp, ASCBptspp, ATPS4rpp, CELBpts, CHTBSptspp, DHAPT, FRUpts2pp, FRUptspp, GALTptspp, GAMptspp, GLCptspp, MALTptspp, MANGLYCptspp, MANptspp, MNLptspp, SBTptspp, SUCptspp, TREptspp
9583	-49.5361	EX_succ_e	10.8056	-10	0.0694611	4	30.0575	-13.0428	25.8624	-3.81046	8.00562	b2465, b2415, b3732, b0681	2DGLCptspp, ACGAptspp, ACMANAptspp, ACMUMptspp, ARBTptspp, ASCBptspp, ATPS4rpp, CELBpts, CHTBSptspp, DHAPT, FRUpts2pp, FRUptspp, GALTptspp, GAMptspp, GLCptspp, MALTptspp, MANGLYCptspp, MANptspp, MNLptspp, SBTptspp, SUCptspp, TREptspp
9584	-49.5361	EX_succ_e	10.8056	-10	0.0694611	4	30.0575	-13.0428	25.8624	-3.81046	8.00562	b0099, b2415, b3738, b3396	2DGLCptspp, ACGAptspp, ACMANAptspp, ACMUMptspp, ARBTptspp, ASCBptspp, ATPS4rpp, CELBpts, CHTBSptspp, DHAPT, FRUpts2pp, FRUptspp, GALTptspp, GAMptspp, GLCptspp, MALTptspp, MANGLYCptspp, MANptspp, MNLptspp, SBTptspp, SUCptspp, TREptspp
9585	-49.5361	EX_succ_e	10.8056	-10	0.0694611	4	30.0575	-13.0428	25.8624	-3.81046	8.00562	b2415, b3744, b3738, b0974	2DGLCptspp, ACGAptspp, ACMANAptspp, ACMUMptspp, ARBTptspp, ASCBptspp, ATPS4rpp, CELBpts, CHTBSptspp, DHAPT, FRUpts2pp, FRUptspp, GALTptspp, GAMptspp, GLCptspp, MALTptspp, MANGLYCptspp, MANptspp, MNLptspp, SBTptspp, SUCptspp, TREptspp
9586	-49.5361	EX_succ_e	10.8056	-10	0.0694611	4	30.0575	-13.0428	25.8624	-3.81046	8.00562	b2415, b3738, b0509, b1490	2DGLCptspp, ACGAptspp, ACMANAptspp, ACMUMptspp, ARBTptspp, ASCBptspp, ATPS4rpp, CELBpts, CHTBSptspp, DHAPT, FRUpts2pp, FRUptspp, GALTptspp, GAMptspp, GLCptspp, MALTptspp, MANGLYCptspp, MANptspp, MNLptspp, SBTptspp, SUCptspp, TREptspp
9587	-49.5361	EX_succ_e	10.8056	-10	0.0694611	4	30.0575	-13.0428	25.8624	-3.81046	8.00562	b2415, b4260, b3732, b1443	2DGLCptspp, ACGAptspp, ACMANAptspp, ACMUMptspp, ARBTptspp, ASCBptspp, ATPS4rpp, CELBpts, CHTBSptspp, DHAPT, FRUpts2pp, FRUptspp, GALTptspp, GAMptspp, GLCptspp, MALTptspp, MANGLYCptspp, MANptspp, MNLptspp, SBTptspp, SUCptspp, TREptspp
9588	-49.5361	EX_succ_e	10.8056	-10	0.0694611	4	30.0575	-13.0428	25.8624	-3.81046	8.00562	b2378, b2415, b3736, b4136	2DGLCptspp, ACGAptspp, ACMANAptspp, ACMUMptspp, ARBTptspp, ASCBptspp, ATPS4rpp, CELBpts, CHTBSptspp, DHAPT, DSBDR, EDTXS3, FRUpts2pp, FRUptspp, GALTptspp, GAMptspp, GLCptspp, MALTptspp, MANGLYCptspp, MANptspp, MNLptspp, SBTptspp, SUCptspp, TDSR1, TDSR2, TREptspp
9589	-49.5361	EX_succ_e	10.8056	-10	0.0694611	4	30.0575	-13.0428	25.8624	-3.81046	8.00562	b2415, b3732, b3258, b1616	2DGLCptspp, ACGAptspp, ACMANAptspp, ACMUMptspp, ARBTptspp, ASCBptspp, ATPS4rpp, CELBpts, CHTBSptspp, DHAPT, FRUpts2pp, FRUptspp, GALTptspp, GAMptspp, GLCptspp, MALTptspp, MANGLYCptspp, MANptspp, METGLCURt2pp, MNLptspp, PNTOt4pp, SBTptspp, SUCptspp, TREptspp
9590	-49.5361	EX_succ_e	10.8056	-10	0.0694611	4	30.0575	-13.0428	25.8624	-3.81046	8.00562	b2415, b3732, b4035, b1002	14GLUCANabcpp, 2DGLCptspp, ACGAptspp, ACMANAptspp, ACMUMptspp, ARBTptspp, ASCBptspp, ATPS4rpp, CELBpts, CHTBSptspp, DHAPT, FRUpts2pp, FRUptspp, GAL1PPpp, GALTptspp, GAMptspp, GLCptspp, MALTHXabcpp, MALTPTabcpp, MALTTRabcpp, MALTTTRabcpp, MALTabcpp, MALTptspp, MANGLYCptspp, MANptspp, MNLptspp, SBTptspp, SUCptspp, TREptspp
9591	-49.5361	EX_succ_e	10.8056	-10	0.0694611	4	30.0575	-13.0428	25.8624	-3.81046	8.00562	b2415, b1227, b3732, b1022	2DGLCptspp, ACGAptspp, ACMANAptspp, ACMUMptspp, ARBTptspp, ASCBptspp, ATPS4rpp, CELBpts, CHTBSptspp, DHAPT, FRUpts2pp, FRUptspp, GALTptspp, GAMptspp, GLCptspp, MALTptspp, MANGLYCptspp, MANptspp, MNLptspp, PUACGAMS, PUACGAMtr, SBTptspp, SUCptspp, TREptspp
9592	-49.5361	EX_succ_e	10.8056	-10	0.0694611	4	30.0575	-13.0428	25.8624	-3.81046	8.00562	b2415, b3732, b2997, b0459	2DGLCptspp, ACGAptspp, ACMANAptspp, ACMUMptspp, ARBTptspp, ASCBptspp, ATPS4rpp, CELBpts, CHTBSptspp, DHAPT, FRUpts2pp, FRUptspp, GALTptspp, GAMptspp, GLCATr, GLCptspp, MALTATr, MALTptspp, MANGLYCptspp, MANptspp, MNLptspp, SBTptspp, SUCptspp, TREptspp
9593	-49.5361	EX_succ_e	10.8056	-10	0.0694611	4	30.0575	-13.0428	25.8624	-3.81046	8.00562	b2415, b3904, b2487, b3736	2DGLCptspp, ACGAptspp, ACMANAptspp, ACMUMptspp, ARBTptspp, ASCBptspp, ATPS4rpp, CELBpts, CHTBSptspp, DHAPT, FRUpts2pp, FRUptspp, GALTptspp, GAMptspp, GLCptspp, MALTptspp, MANGLYCptspp, MANptspp, MNLptspp, RMK, SBTptspp, SUCptspp, TREptspp
9594	-49.5361	EX_succ_e	10.8056	-10	0.0694611	4	30.0575	-13.0428	25.8624	-3.81046	8.00562	b2415, b2871, b3732, b2470	2DGLCptspp, ACGAptspp, ACMANAptspp, ACMUMptspp, ARBTptspp, ASCBptspp, ATPS4rpp, CELBpts, CHTBSptspp, DAPAL, DHAPT, FRUpts2pp, FRUptspp, GALTptspp, GAMptspp, GLCptspp, MALTptspp, MANGLYCptspp, MANptspp, MNLptspp, SBTptspp, SUCptspp, TREptspp
9595	-49.5361	EX_succ_e	10.8056	-10	0.0694611	4	30.0575	-13.0428	25.8624	-3.81046	8.00562	b2415, b3732, b2174, b1113	2DGLCptspp, ACGAptspp, ACMANAptspp, ACMUMptspp, ARBTptspp, ASCBptspp, ATPS4rpp, CELBpts, CHTBSptspp, COLIPAKpp, DHAPT, FRUpts2pp, FRUptspp, GALTptspp, GAMptspp, GLCptspp, MALTptspp, MANGLYCptspp, MANptspp, MNLptspp, SBTptspp, SUCptspp, TREptspp
9596	-49.5361	EX_succ_e	10.8056	-10	0.0694611	4	30.0575	-13.0428	25.8624	-3.81046	8.00562	b2415, b0862, b2486, b3736	2DGLCptspp, ACGAptspp, ACMANAptspp, ACMUMptspp, ARBTptspp, ASCBptspp, ATPS4rpp, CELBpts, CHTBSptspp, DHAPT, FRUpts2pp, FRUptspp, GALTptspp, GAMptspp, GLCptspp, MALTptspp, MANGLYCptspp, MANptspp, MNLptspp, SBTptspp, SUCptspp, TREptspp
9597	-49.5361	EX_succ_e	10.8056	-10	0.0694611	4	30.0575	-13.0428	25.8624	-3.81046	8.00562	b2415, b3736, b2927, b3876	2DGLCptspp, ACGAptspp, ACMANAptspp, ACMUMptspp, ARBTptspp, ASCBptspp, ATPS4rpp, CELBpts, CHTBSptspp, DHAPT, FRUpts2pp, FRUptspp, GALTptspp, GAMptspp, GLCptspp, MALTptspp, MANGLYCptspp, MANptspp, MNLptspp, SBTptspp, SQtr, SUCptspp, TREptspp
9598	-49.5361	EX_succ_e	10.8056	-10	0.0694611	4	30.0575	-13.0428	25.8624	-3.81046	8.00562	b2168, b2415, b3736, b0934	2DGLCptspp, ACGAptspp, ACMANAptspp, ACMUMptspp, ARBTptspp, ASCBptspp, ATPS4rpp, CELBpts, CHTBSptspp, DHAPT, ETHSO3abcpp, FRUK, FRUpts2pp, FRUptspp, GALTptspp, GAMptspp, GLCptspp, MALTptspp, MANGLYCptspp, MANptspp, MNLptspp, MSO3abcpp, SBTptspp, SUCptspp, SULFACabcpp, TREptspp
9599	-49.5361	EX_succ_e	10.8056	-10	0.0694611	4	30.0575	-13.0428	25.8624	-3.81046	8.00562	b4039, b2415, b0675, b3732	2DGLCptspp, ACGAptspp, ACMANAptspp, ACMUMptspp, ARBTptspp, ASCBptspp, ATPS4rpp, CELBpts, CHTBSptspp, DHAPT, FRUpts2pp, FRUptspp, GALTptspp, GAMptspp, GLCptspp, MALTptspp, MANGLYCptspp, MANptspp, MNLptspp, SBTptspp, SUCptspp, TREptspp
9600	-49.5361	EX_succ_e	10.8056	-10	0.0694611	4	30.0575	-13.0428	25.8624	-3.81046	8.00562	b4024, b2415, b3736, b4356	2DGLCptspp, ACGAptspp, ACMANAptspp, ACMUMptspp, ARBTptspp, ASCBptspp, ATPS4rpp, CELBpts, CHTBSptspp, DHAPT, FRUpts2pp, FRUptspp, GALCTNLt2pp, GALTptspp, GAMptspp, GLCptspp, MALTptspp, MANGLYCptspp, MANptspp, MNLptspp, SBTptspp, SUCptspp, TREptspp
9601	-49.5361	EX_succ_e	10.8056	-10	0.0694611	4	30.0575	-13.0428	25.8624	-3.81046	8.00562	b2415, b3736, b2093, b4476	2DGLCptspp, ACGAptspp, ACMANAptspp, ACMUMptspp, ARBTptspp, ASCBptspp, ATPS4rpp, CELBpts, CHTBSptspp, DHAPT, FRUpts2pp, FRUptspp, GALTptspp, GAMptspp, GLCptspp, MALTptspp, MANGLYCptspp, MANptspp, MNLptspp, SBTptspp, SUCptspp, TREptspp
9602	-49.5361	EX_succ_e	10.8056	-10	0.0694611	4	30.0575	-13.0428	25.8624	-3.81046	8.00562	b2415, b3736, b1781, b1296	2DGLCptspp, ACGAptspp, ACMANAptspp, ACMUMptspp, ARBTptspp, ASCBptspp, ATPS4rpp, CELBpts, CHTBSptspp, DHAPT, FRUpts2pp, FRUptspp, GALTptspp, GAMptspp, GLCptspp, MALTptspp, MANGLYCptspp, MANptspp, MNLptspp, SBTptspp, SUCptspp, TREptspp
9603	-49.5361	EX_succ_e	10.8056	-10	0.0694611	4	30.0575	-13.0428	25.8624	-3.81046	8.00562	b2415, b3736, b3735, b0731	2DGLCptspp, ACGAptspp, ACMANAptspp, ACMUMptspp, ARBTptspp, ASCBptspp, ATPS4rpp, CELBpts, CHTBSptspp, DHAPT, FRUpts2pp, FRUptspp, GALTptspp, GAMptspp, GLCptspp, MALTptspp, MANGLYCptspp, MANptspp, MNLptspp, SBTptspp, SUCptspp, TREptspp
9604	-49.5361	EX_succ_e	10.8056	-10	0.0694611	4	30.0575	-13.0428	25.8624	-3.81046	8.00562	b2415, b2719, b3732, b2810	2DGLCptspp, ACGAptspp, ACMANAptspp, ACMUMptspp, ARBTptspp, ASCBptspp, ATPS4rpp, CELBpts, CHTBSptspp, DHAPT, FRUpts2pp, FRUptspp, GALTptspp, GAMptspp, GLCptspp, MALTptspp, MANGLYCptspp, MANptspp, MNLptspp, SBTptspp, SUCptspp, TREptspp
9605	-49.5361	EX_succ_e	10.8056	-10	0.0694611	4	30.0575	-13.0428	25.8624	-3.81046	8.00562	b2415, b3732, b4120, b1440	2DGLCptspp, ACGAptspp, ACMANAptspp, ACMUMptspp, ARBTptspp, ASCBptspp, ATPS4rpp, CELBpts, CHTBSptspp, DHAPT, FRUpts2pp, FRUptspp, GALTptspp, GAMptspp, GLCptspp, MALTptspp, MANGLYCptspp, MANptspp, MNLptspp, SBTptspp, SUCptspp, TREptspp
9606	-49.5361	EX_succ_e	10.8056	-10	0.0694611	4	30.0575	-13.0428	25.8624	-3.81046	8.00562	b0125, b2415, b3736, b0855	2DGLCptspp, ACGAptspp, ACMANAptspp, ACMUMptspp, ARBTptspp, ASCBptspp, ATPS4rpp, CELBpts, CHTBSptspp, DHAPT, FRUpts2pp, FRUptspp, GALTptspp, GAMptspp, GLCptspp, MALTptspp, MANGLYCptspp, MANptspp, MNLptspp, SBTptspp, SUCptspp, TREptspp
9607	-49.5361	EX_succ_e	10.8056	-10	0.0694611	4	30.0575	-13.0428	25.8624	-3.81046	8.00562	b1190, b2415, b3732, b1021	2DGLCptspp, ACGAptspp, ACMANAptspp, ACMUMptspp, ARBTptspp, ASCBptspp, ATPS4rpp, CELBpts, CHTBSptspp, DHAPT, FRUpts2pp, FRUptspp, GALTptspp, GAMptspp, GLCptspp, MALTptspp, MANGLYCptspp, MANptspp, MNLptspp, PUACGAMS, PUACGAMtr, SBTptspp, SUCptspp, TREptspp
9608	-49.5361	EX_succ_e	10.8056	-10	0.0694611	4	30.0575	-13.0428	25.8624	-3.81046	8.00562	b2415, b3736, b3735, b0047	2DGLCptspp, ACGAptspp, ACMANAptspp, ACMUMptspp, ARBTptspp, ASCBptspp, ATPS4rpp, CELBpts, CHTBSptspp, DHAPT, FRUpts2pp, FRUptspp, GALTptspp, GAMptspp, GLCptspp, MALTptspp, MANGLYCptspp, MANptspp, MNLptspp, SBTptspp, SUCptspp, TREptspp
9609	-49.5361	EX_succ_e	10.8056	-10	0.0694611	4	30.0575	-13.0428	25.8624	-3.81046	8.00562	b2415, b1819, b3738, b2302	2DGLCptspp, ACGAptspp, ACMANAptspp, ACMUMptspp, ARBTptspp, ASCBptspp, ATPS4rpp, CELBpts, CHTBSptspp, DHAPT, FRUpts2pp, FRUptspp, GALTptspp, GAMptspp, GLCptspp, MALTptspp, MANGLYCptspp, MANptspp, MNLptspp, SBTptspp, SUCptspp, TREptspp
9610	-49.5361	EX_succ_e	10.8056	-10	0.0694611	4	30.0575	-13.0428	25.8624	-3.81046	8.00562	b1732, b2415, b3732, b1442	2DGLCptspp, ACGAptspp, ACMANAptspp, ACMUMptspp, ARBTptspp, ASCBptspp, ATPS4rpp, CELBpts, CHTBSptspp, DHAPT, FRUpts2pp, FRUptspp, GALTptspp, GAMptspp, GLCptspp, MALTptspp, MANGLYCptspp, MANptspp, MNLptspp, SBTptspp, SUCptspp, TREptspp
9611	-49.5361	EX_succ_e	10.8056	-10	0.0694611	4	30.0575	-13.0428	25.8624	-3.81046	8.00562	b2518, b1612, b2415, b3732	2DGLCptspp, ACGAptspp, ACMANAptspp, ACMUMptspp, ARBTptspp, ASCBptspp, ATPS4rpp, CELBpts, CHTBSptspp, DHAPT, FRUpts2pp, FRUptspp, GALTptspp, GAMptspp, GLCptspp, MALTptspp, MANGLYCptspp, MANptspp, MNLptspp, SBTptspp, SUCptspp, TREptspp
9612	-49.5361	EX_succ_e	10.8056	-10	0.0694611	4	30.0575	-13.0428	25.8624	-3.81046	8.00562	b2415, b2705, b3732, b1616	2DGLCptspp, ACGAptspp, ACMANAptspp, ACMUMptspp, ARBTptspp, ASCBptspp, ATPS4rpp, CELBpts, CHTBSptspp, DHAPT, FRUpts2pp, FRUptspp, GALTptspp, GAMptspp, GLCptspp, MALTptspp, MANGLYCptspp, MANptspp, METGLCURt2pp, MNLptspp, SBTPD, SBTptspp, SUCptspp, TREptspp
9613	-49.5361	EX_succ_e	10.8056	-10	0.0694611	4	30.0575	-13.0428	25.8624	-3.81046	8.00562	b2415, b0996, b3736, b2254	2DGLCptspp, ACGAptspp, ACMANAptspp, ACMUMptspp, ARBTptspp, ASCBptspp, ATPS4rpp, CELBpts, CHTBSptspp, DHAPT, FRUpts2pp, FRUptspp, GALTptspp, GAMptspp, GLCptspp, MALTptspp, MANGLYCptspp, MANptspp, MNLptspp, SBTptspp, SUCptspp, TREptspp, UPLA4FNT
9614	-49.5361	EX_succ_e	10.8056	-10	0.0694611	4	30.0575	-13.0428	25.8624	-3.81046	8.00562	b2415, b3736, b0353, b0418	2DGLCptspp, ACGAptspp, ACMANAptspp, ACMUMptspp, ARBTptspp, ASCBptspp, ATPS4rpp, CELBpts, CHTBSptspp, DHAPT, FRUpts2pp, FRUptspp, GALTptspp, GAMptspp, GLCptspp, HCINNMt2rpp, HPPPNt2rpp, MALTptspp, MANGLYCptspp, MANptspp, MNLptspp, SBTptspp, SUCptspp, TREptspp
9615	-49.5361	EX_succ_e	10.8056	-10	0.0694611	4	30.0575	-13.0428	25.8624	-3.81046	8.00562	b0446, b2415, b3845, b3736	2DGLCptspp, ACGAptspp, ACMANAptspp, ACMUMptspp, ARBTptspp, ASCBptspp, ATPS4rpp, CELBpts, CHTBSptspp, DHAPT, FRUpts2pp, FRUptspp, GALTptspp, GAMptspp, GLCptspp, MALTptspp, MANGLYCptspp, MANptspp, MNLptspp, SBTptspp, SUCptspp, TREptspp
9616	-49.5361	EX_succ_e	10.8056	-10	0.0694611	4	30.0575	-13.0428	25.8624	-3.81046	8.00562	b2415, b3736, b1448, b4099	2DGLCptspp, ACGAptspp, ACMANAptspp, ACMUMptspp, ARBTptspp, ARMEPNS, ASCBptspp, ATPS4rpp, CELBpts, CHTBSptspp, DHAPT, FRUpts2pp, FRUptspp, GALTptspp, GAMptspp, GLCptspp, MALTptspp, MANGLYCptspp, MANptspp, METNA, MNLptspp, SBTptspp, SUCptspp, TREptspp
9617	-49.5361	EX_succ_e	10.8056	-10	0.0694611	4	30.0575	-13.0428	25.8624	-3.81046	8.00562	b2415, b3738, b4035, b4230	14GLUCANabcpp, 2DGLCptspp, ACGAptspp, ACMANAptspp, ACMUMptspp, ARBTptspp, ASCBptspp, ATPS4rpp, CELBpts, CHTBSptspp, DHAPT, FRUpts2pp, FRUptspp, GALTptspp, GAMptspp, GLCptspp, MALTHXabcpp, MALTPTabcpp, MALTTRabcpp, MALTTTRabcpp, MALTabcpp, MALTptspp, MANGLYCptspp, MANptspp, MNLptspp, SBTptspp, SUCptspp, TREptspp
9618	-49.5361	EX_succ_e	10.8056	-10	0.0694611	4	30.0575	-13.0428	25.8624	-3.81046	8.00562	b2415, b0158, b3736, b0842	2DGLCptspp, ACGAptspp, ACMANAptspp, ACMUMptspp, ADOCBLabcpp, ARBTptspp, ASCBptspp, ATPS4rpp, CBIuabcpp, CBL1abcpp, CELBpts, CHTBSptspp, DHAPT, FRUpts2pp, FRUptspp, GALTptspp, GAMptspp, GLCptspp, MALTptspp, MANGLYCptspp, MANptspp, MNLptspp, SBTptspp, SUCptspp, TREptspp
9619	-49.5361	EX_succ_e	10.8056	-10	0.0694611	4	30.0575	-13.0428	25.8624	-3.81046	8.00562	b2415, b3062, b3732, b2047	2DGLCptspp, ACGAptspp, ACMANAptspp, ACMUMptspp, ARBTptspp, ASCBptspp, ATPS4rpp, CELBpts, CHTBSptspp, DHAPT, FRUpts2pp, FRUptspp, GALTptspp, GAMptspp, GLCptspp, MALTptspp, MANGLYCptspp, MANptspp, MNLptspp, SBTptspp, SUCptspp, TARTD, TREptspp, UDPGPT
9620	-49.5361	EX_succ_e	10.8056	-10	0.0694611	4	30.0575	-13.0428	25.8624	-3.81046	8.00562	b2415, b3902, b3736, b1723	2DGLCptspp, ACGAptspp, ACMANAptspp, ACMUMptspp, ARBTptspp, ASCBptspp, ATPS4rpp, CELBpts, CHTBSptspp, DHAPT, FRUpts2pp, FRUptspp, GALTptspp, GAMptspp, GLCptspp, MALTptspp, MANGLYCptspp, MANptspp, MNLptspp, RMPA, SBTptspp, SUCptspp, TREptspp
9621	-49.5361	EX_succ_e	10.8056	-10	0.0694611	4	30.0575	-13.0428	25.8624	-3.81046	8.00562	b2579, b2415, b3904, b3736	2DGLCptspp, ACGAptspp, ACMANAptspp, ACMUMptspp, ARBTptspp, ASCBptspp, ATPS4rpp, CELBpts, CHTBSptspp, DHAPT, FRUpts2pp, FRUptspp, GALTptspp, GAMptspp, GLCptspp, MALTptspp, MANGLYCptspp, MANptspp, MNLptspp, RMK, SBTptspp, SUCptspp, TREptspp
9622	-49.5361	EX_succ_e	10.8056	-10	0.0694611	4	30.0575	-13.0428	25.8624	-3.81046	8.00562	b3671, b2415, b3736, b4034	14GLUCANabcpp, 2DGLCptspp, ACGAptspp, ACMANAptspp, ACMUMptspp, ARBTptspp, ASCBptspp, ATPS4rpp, CELBpts, CHTBSptspp, DHAPT, FRUpts2pp, FRUptspp, GALTptspp, GAMptspp, GLCptspp, MALTHXabcpp, MALTPTabcpp, MALTTRabcpp, MALTTTRabcpp, MALTabcpp, MALTptspp, MANGLYCptspp, MANptspp, MNLptspp, SBTptspp, SUCptspp, TREptspp
9623	-49.5361	EX_succ_e	10.8056	-10	0.0694611	4	30.0575	-13.0428	25.8624	-3.81046	8.00562	b2415, b3732, b2093, b1341	2DGLCptspp, ACGAptspp, ACMANAptspp, ACMUMptspp, ARBTptspp, ASCBptspp, ATPS4rpp, CELBpts, CHTBSptspp, DHAPT, FRUpts2pp, FRUptspp, GALTptspp, GAMptspp, GLCptspp, MALTptspp, MANGLYCptspp, MANptspp, MNLptspp, SBTptspp, SUCptspp, TREptspp
9624	-49.5361	EX_succ_e	10.8056	-10	0.0694611	4	30.0575	-13.0428	25.8624	-3.81046	8.00562	b2415, b0335, b1386, b3736	2DGLCptspp, 42A12BOOXpp, ACGAptspp, ACMANAptspp, ACMUMptspp, ARBTptspp, ASCBptspp, ATPS4rpp, CELBpts, CHTBSptspp, DHAPT, FRUpts2pp, FRUptspp, GALTptspp, GAMptspp, GLCptspp, MALTptspp, MANGLYCptspp, MANptspp, MNLptspp, PEAMNOpp, SBTptspp, SUCptspp, TREptspp, TYROXDApp
9625	-49.5361	EX_succ_e	10.8056	-10	0.0694611	4	30.0575	-13.0428	25.8624	-3.81046	8.00562	b2415, b3732, b0306, b1185	2DGLCptspp, ACGAptspp, ACMANAptspp, ACMUMptspp, ARBTptspp, ASCBptspp, ATPS4rpp, CELBpts, CHTBSptspp, DHAPT, DSBAO1, DSBAO2, FRUpts2pp, FRUptspp, GALTptspp, GAMptspp, GLCptspp, MALTptspp, MANGLYCptspp, MANptspp, MNLptspp, SBTptspp, SUCptspp, TREptspp
9626	-49.5361	EX_succ_e	10.8056	-10	0.0694611	4	30.0575	-13.0428	25.8624	-3.81046	8.00562	b3225, b2415, b3732, b3943	2DGLCptspp, ACGAptspp, ACMANAptspp, ACMUMptspp, ACNML, ARBTptspp, ASCBptspp, ATPS4rpp, CELBpts, CHTBSptspp, CYSItpp, DHAPT, FRUpts2pp, FRUptspp, GALTptspp, GAMptspp, GLCptspp, MALTptspp, MANGLYCptspp, MANptspp, MNLptspp, SBTptspp, SUCptspp, TREptspp
9627	-49.5361	EX_succ_e	10.8056	-10	0.0694611	4	30.0575	-13.0428	25.8624	-3.81046	8.00562	b3670, b2415, b3117, b3736	2DGLCptspp, ACGAptspp, ACMANAptspp, ACMUMptspp, ARBTptspp, ASCBptspp, ATPS4rpp, CELBpts, CHTBSptspp, DHAPT, FRUpts2pp, FRUptspp, GALTptspp, GAMptspp, GLCptspp, MALTptspp, MANGLYCptspp, MANptspp, MNLptspp, SBTptspp, SUCptspp, TREptspp
9628	-49.5361	EX_succ_e	10.8056	-10	0.0694611	4	30.0575	-13.0428	25.8624	-3.81046	8.00562	b0002, b2415, b3736, b1990	2DGLCptspp, ACGAptspp, ACMANAptspp, ACMUMptspp, ARBTptspp, ASCBptspp, ATPS4rpp, CELBpts, CHTBSptspp, DHAPT, FRUpts2pp, FRUptspp, GALTptspp, GAMptspp, GLCptspp, MALTptspp, MANGLYCptspp, MANptspp, MNLptspp, SBTptspp, SUCptspp, TREptspp
9629	-49.5361	EX_succ_e	10.8056	-10	0.0694611	4	30.0575	-13.0428	25.8624	-3.81046	8.00562	b2415, b3117, b2661, b3736	2DGLCptspp, ACGAptspp, ACMANAptspp, ACMUMptspp, ARBTptspp, ASCBptspp, ATPS4rpp, CELBpts, CHTBSptspp, DHAPT, FRUpts2pp, FRUptspp, GALTptspp, GAMptspp, GLCptspp, MALTptspp, MANGLYCptspp, MANptspp, MNLptspp, SBTptspp, SUCptspp, TREptspp
9630	-49.5361	EX_succ_e	10.8056	-10	0.0694611	4	30.0575	-13.0428	25.8624	-3.81046	8.00562	b2579, b2415, b3732, b2245	2DGLCptspp, ACGAptspp, ACMANAptspp, ACMUMptspp, ARBTptspp, ASCBptspp, ATPS4rpp, CELBpts, CHTBSptspp, DHAPT, FRUpts2pp, FRUptspp, GALTptspp, GAMptspp, GLCptspp, LKDRA, MALTptspp, MANGLYCptspp, MANptspp, MNLptspp, SBTptspp, SUCptspp, TREptspp
9631	-49.5361	EX_succ_e	10.8056	-10	0.0694611	4	30.0575	-13.0428	25.8624	-3.81046	8.00562	b2415, b3738, b1002, b2842	2DGLCptspp, ACGAptspp, ACMANAptspp, ACMUMptspp, ARBTptspp, ASCBptspp, ATPS4rpp, CELBpts, CHTBSptspp, DHAPT, FRUpts2pp, FRUptspp, GAL1PPpp, GALTptspp, GAMptspp, GLCptspp, MALTptspp, MANGLYCptspp, MANptspp, MNLptspp, SBTptspp, SUCptspp, TREptspp
9632	-49.5361	EX_succ_e	10.8056	-10	0.0694611	4	30.0575	-13.0428	25.8624	-3.81046	8.00562	b2415, b3127, b3736, b0622	2DGLCptspp, ACGAptspp, ACMANAptspp, ACMUMptspp, ARBTptspp, ASCBptspp, ATPS4rpp, CELBpts, CHTBSptspp, DHAPT, FRUpts2pp, FRUptspp, GALTptspp, GAMptspp, GLCptspp, LIPAHT2ex, LIPAHTex, MALTptspp, MANGLYCptspp, MANptspp, MNLptspp, SBTptspp, SUCptspp, TREptspp
9633	-49.5361	EX_succ_e	10.8056	-10	0.0694611	4	30.0575	-13.0428	25.8624	-3.81046	8.00562	b2415, b2727, b3736, b3477	2DGLCptspp, ACGAptspp, ACMANAptspp, ACMUMptspp, ARBTptspp, ASCBptspp, ATPS4rpp, CELBpts, CHTBSptspp, DHAPT, FRUpts2pp, FRUptspp, GALTptspp, GAMptspp, GLCptspp, MALTptspp, MANGLYCptspp, MANptspp, MNLptspp, SBTptspp, SUCptspp, TREptspp
9634	-49.5361	EX_succ_e	10.8056	-10	0.0694611	4	30.0575	-13.0428	25.8624	-3.81046	8.00562	b1588, b3781, b2415, b3732	2DGLCptspp, ACGAptspp, ACMANAptspp, ACMUMptspp, ARBTptspp, ASCBptspp, ATPS4rpp, CELBpts, CHTBSptspp, DHAPT, FRUpts2pp, FRUptspp, GALTptspp, GAMptspp, GLCptspp, MALTptspp, MANGLYCptspp, MANptspp, MNLptspp, SBTptspp, SELR, SUCptspp, TREptspp
9635	-49.5361	EX_succ_e	10.8056	-10	0.0694611	4	30.0575	-13.0428	25.8624	-3.81046	8.00562	b3223, b2415, b3738, b0355	2DGLCptspp, ACGAptspp, ACMANAptspp, ACMUMptspp, AMANAPEr, ARBTptspp, ASCBptspp, ATPS4rpp, CELBpts, CHTBSptspp, DHAPT, FRUpts2pp, FRUptspp, GALTptspp, GAMptspp, GLCptspp, MALTptspp, MANGLYCptspp, MANptspp, MNLptspp, SBTptspp, SUCptspp, TREptspp
9636	-49.5361	EX_succ_e	10.8056	-10	0.0694611	4	30.0575	-13.0428	25.8624	-3.81046	8.00562	b2053, b2415, b2738, b3738	2DGLCptspp, ACGAptspp, ACMANAptspp, ACMUMptspp, ARBTptspp, ASCBptspp, ATPS4rpp, CELBpts, CHTBSptspp, DHAPT, FRUpts2pp, FRUptspp, GALTptspp, GAMptspp, GLCptspp, GMAND, MALTptspp, MANGLYCptspp, MANptspp, MNLptspp, SBTptspp, SUCptspp, TREptspp
9637	-49.5361	EX_succ_e	10.8056	-10	0.0694611	4	30.0575	-13.0428	25.8624	-3.81046	8.00562	b3788, b2415, b3732, b3751	2DGLCptspp, ACGAptspp, ACMANAptspp, ACMUMptspp, ARBTptspp, ASCBptspp, ATPS4rpp, CELBpts, CHTBSptspp, DHAPT, FRUpts2pp, FRUptspp, GALTptspp, GAMptspp, GLCptspp, MALTptspp, MANGLYCptspp, MANptspp, MNLptspp, SBTptspp, SUCptspp, TREptspp
9638	-49.5361	EX_succ_e	10.8056	-10	0.0694611	4	30.0575	-13.0428	25.8624	-3.81046	8.00562	b2415, b0575, b0186, b3732	2DGLCptspp, ACGAptspp, ACMANAptspp, ACMUMptspp, AGt3, ARBTptspp, ASCBptspp, ATPS4rpp, CELBpts, CHTBSptspp, CUt3, DHAPT, FRUpts2pp, FRUptspp, GALTptspp, GAMptspp, GLCptspp, MALTptspp, MANGLYCptspp, MANptspp, MNLptspp, SBTptspp, SUCptspp, TREptspp
9639	-49.5361	EX_succ_e	10.8056	-10	0.0694611	4	30.0575	-13.0428	25.8624	-3.81046	8.00562	b2415, b2361, b1873, b3732	2DGLCptspp, ACGAptspp, ACMANAptspp, ACMUMptspp, ARBTptspp, ASCBptspp, ATPS4rpp, CELBpts, CHTBSptspp, DHAPT, DMSOR1pp, DMSOR2pp, FRUpts2pp, FRUptspp, GALTptspp, GAMptspp, GLCptspp, MALTptspp, MANGLYCptspp, MANptspp, MNLptspp, SBTptspp, SUCptspp, TREptspp
9640	-49.5361	EX_succ_e	10.8056	-10	0.0694611	4	30.0575	-13.0428	25.8624	-3.81046	8.00562	b2415, b3732, b3748, b2303	2DGLCptspp, ACGAptspp, ACMANAptspp, ACMUMptspp, ARBTptspp, ASCBptspp, ATPS4rpp, CELBpts, CHTBSptspp, DHAPT, DHPTPE, FRUpts2pp, FRUptspp, GALTptspp, GAMptspp, GLCptspp, MALTptspp, MANGLYCptspp, MANptspp, MNLptspp, SBTptspp, SUCptspp, TREptspp
9641	-49.5361	EX_succ_e	10.8056	-10	0.0694611	4	30.0575	-13.0428	25.8624	-3.81046	8.00562	b2415, b2095, b3568, b3738	2DGLCptspp, ACGAptspp, ACMANAptspp, ACMUMptspp, ARBTptspp, ASCBptspp, ATPS4rpp, CELBpts, CHTBSptspp, DHAPT, FRUpts2pp, FRUptspp, GALTptspp, GAMptspp, GLCptspp, MALTptspp, MANGLYCptspp, MANptspp, MNLptspp, SBTptspp, SUCptspp, TREptspp, XYLabcpp
9642	-49.5361	EX_succ_e	10.8056	-10	0.0694611	4	30.0575	-13.0428	25.8624	-3.81046	8.00562	b2415, b1907, b3738, b2997	2DGLCptspp, ACGAptspp, ACMANAptspp, ACMUMptspp, ARBTptspp, ASCBptspp, ATPS4rpp, CELBpts, CHTBSptspp, DHAPT, FRUpts2pp, FRUptspp, GALTptspp, GAMptspp, GLCptspp, MALTptspp, MANGLYCptspp, MANptspp, MNLptspp, SBTptspp, SUCptspp, TREptspp
9643	-49.5361	EX_succ_e	10.8056	-10	0.0694611	4	30.0575	-13.0428	25.8624	-3.81046	8.00562	b0895, b2415, b0754, b3736	2DGLCptspp, ACGAptspp, ACMANAptspp, ACMUMptspp, ARBTptspp, ASCBptspp, ATPS4rpp, CELBpts, CHTBSptspp, DHAPT, DMSOR2, FRUpts2pp, FRUptspp, GALTptspp, GAMptspp, GLCptspp, MALTptspp, MANGLYCptspp, MANptspp, MNLptspp, SBTptspp, SUCptspp, TMAOR2, TREptspp
9644	-49.5361	EX_succ_e	10.8056	-10	0.0694611	4	30.0575	-13.0428	25.8624	-3.81046	8.00562	b2415, b3736, b0809, b2843	2DGLCptspp, ACGAptspp, ACMANAptspp, ACMUMptspp, ARBTptspp, ASCBptspp, ATPS4rpp, CELBpts, CHTBSptspp, DHAPT, FRUpts2pp, FRUptspp, GALTptspp, GAMptspp, GLCptspp, GLNabcpp, KDUI, MALTptspp, MANGLYCptspp, MANptspp, MNLptspp, SBTptspp, SUCptspp, TREptspp
9645	-49.5361	EX_succ_e	10.8056	-10	0.0694611	4	30.0575	-13.0428	25.8624	-3.81046	8.00562	b2415, b2393, b3738, b1661	2DGLCptspp, ACGAptspp, ACMANAptspp, ACMUMptspp, ARBTptspp, ASCBptspp, ATPS4rpp, CELBpts, CFAS160E, CFAS160G, CFAS180E, CFAS180G, CHTBSptspp, DHAPT, FRUpts2pp, FRUptspp, GALTptspp, GAMptspp, GLCptspp, MALTptspp, MANGLYCptspp, MANptspp, MNLptspp, SBTptspp, SUCptspp, TREptspp
9646	-49.5361	EX_succ_e	10.8056	-10	0.0694611	4	30.0575	-13.0428	25.8624	-3.81046	8.00562	b2415, b3736, b2303, b1008	2DGLCptspp, ACGAptspp, ACMANAptspp, ACMUMptspp, ARBTptspp, ASCBptspp, ATPS4rpp, CELBpts, CHTBSptspp, DHAPT, DHPTPE, FRUpts2pp, FRUptspp, GALTptspp, GAMptspp, GLCptspp, MALTptspp, MANGLYCptspp, MANptspp, MNLptspp, SBTptspp, SUCptspp, TREptspp
9647	-49.5361	EX_succ_e	10.8056	-10	0.0694611	4	30.0575	-13.0428	25.8624	-3.81046	8.00562	b0732, b2415, b3137, b3736	2DGLCptspp, ACGAptspp, ACMANAptspp, ACMUMptspp, ARBTptspp, ASCBptspp, ATPS4rpp, CELBpts, CHTBSptspp, DHAPT, FRUpts2pp, FRUptspp, GALTptspp, GAMptspp, GLCptspp, MALTptspp, MANGLYCptspp, MANPGH, MANptspp, MNLptspp, SBTptspp, SUCptspp, TREptspp
9648	-49.5361	EX_succ_e	10.8056	-10	0.0694611	4	30.0575	-13.0428	25.8624	-3.81046	8.00562	b3789, b2662, b2415, b3738	2DGLCptspp, ACGAptspp, ACMANAptspp, ACMUMptspp, ARBTptspp, ASCBptspp, ATPS4rpp, CELBpts, CHTBSptspp, DHAPT, FRUpts2pp, FRUptspp, GALTptspp, GAMptspp, GLCptspp, MALTptspp, MANGLYCptspp, MANptspp, MNLptspp, SBTptspp, SUCptspp, TREptspp
9649	-49.5361	EX_succ_e	10.8056	-10	0.0694611	4	30.0575	-13.0428	25.8624	-3.81046	8.00562	b2415, b3578, b4131, b3732	23DOGULNt4pp, 2DGLCptspp, ACGAptspp, ACMANAptspp, ACMUMptspp, ARBTptspp, ASCBptspp, ATPS4rpp, CELBpts, CHTBSptspp, DHAPT, FRUpts2pp, FRUptspp, GALTptspp, GAMptspp, GLCptspp, MALTptspp, MANGLYCptspp, MANptspp, MNLptspp, SBTptspp, SUCptspp, TREptspp, XYLUt2pp
9650	-49.5361	EX_succ_e	10.8056	-10	0.0694611	4	30.0575	-13.0428	25.8624	-3.81046	8.00562	b2415, b1226, b3736, b2010	2DGLCptspp, ACGAptspp, ACMANAptspp, ACMUMptspp, ARBTptspp, ASCBptspp, ATPS4rpp, CELBpts, CHTBSptspp, DHAPT, FRUpts2pp, FRUptspp, GALTptspp, GAMptspp, GLCptspp, MALTptspp, MANGLYCptspp, MANptspp, MNLptspp, SBTptspp, SUCptspp, TREptspp
9651	-49.5361	EX_succ_e	10.8056	-10	0.0694611	4	30.0575	-13.0428	25.8624	-3.81046	8.00562	b2464, b2415, b1465, b3736	2DGLCptspp, ACGAptspp, ACMANAptspp, ACMUMptspp, ARBTptspp, ASCBptspp, ATPS4rpp, CELBpts, CHTBSptspp, DHAPT, FRUpts2pp, FRUptspp, GALTptspp, GAMptspp, GLCptspp, MALTptspp, MANGLYCptspp, MANptspp, MNLptspp, SBTptspp, SUCptspp, TREptspp
9652	-49.5361	EX_succ_e	10.8056	-10	0.0694611	4	30.0575	-13.0428	25.8624	-3.81046	8.00562	b3426, b3908, b2415, b3736	2DGLCptspp, ACGAptspp, ACMANAptspp, ACMUMptspp, ARBTptspp, ASCBptspp, ATPS4rpp, CELBpts, CHTBSptspp, DHAPT, FRUpts2pp, FRUptspp, GALTptspp, GAMptspp, GLCptspp, MALTptspp, MANGLYCptspp, MANptspp, MNLptspp, SBTptspp, SUCptspp, TREptspp
9653	-49.5361	EX_succ_e	10.8056	-10	0.0694611	4	30.0575	-13.0428	25.8624	-3.81046	8.00562	b2415, b3732, b0751, b2895	2DGLCptspp, ACGAptspp, ACMANAptspp, ACMUMptspp, ARBTptspp, ASCBptspp, ATPS4rpp, CELBpts, CHTBSptspp, DHAPT, FRUpts2pp, FRUptspp, GALTptspp, GAMptspp, GLCptspp, MALTptspp, MANGLYCptspp, MANptspp, MNLptspp, NMNPtpp, SBTptspp, SUCptspp, TREptspp
9654	-49.5361	EX_succ_e	10.8056	-10	0.0694611	4	30.0575	-13.0428	25.8624	-3.81046	8.00562	b2415, b1463, b3736, b1002	2DGLCptspp, ACANTHAT, ACGAptspp, ACMANAptspp, ACMUMptspp, ARBTptspp, ASCBptspp, ATPS4rpp, CELBpts, CHTBSptspp, DHAPT, FRUpts2pp, FRUptspp, GAL1PPpp, GALTptspp, GAMptspp, GLCptspp, MALTptspp, MANGLYCptspp, MANptspp, MNLptspp, SBTptspp, SUCptspp, TREptspp
9655	-49.5361	EX_succ_e	10.8056	-10	0.0694611	4	30.0575	-13.0428	25.8624	-3.81046	8.00562	b2415, b0822, b3736, b4544	2DGLCptspp, ACGAptspp, ACMANAptspp, ACMUMptspp, ARBTptspp, ASCBptspp, ATPS4rpp, CELBpts, CHTBSptspp, DHAPT, FRUpts2pp, FRUptspp, GALTptspp, GAMptspp, GLCptspp, MALTptspp, MANGLYCptspp, MANptspp, MNLptspp, SBTptspp, SUCptspp, TREptspp, ULA4Ntppi
9656	-49.5361	EX_succ_e	10.8056	-10	0.0694611	4	30.0575	-13.0428	25.8624	-3.81046	8.00562	b2415, b4193, b2482, b3736	2DGLCptspp, ACGAptspp, ACMANAptspp, ACMUMptspp, ARBTptspp, ASCBptspp, ATPS4rpp, CELBpts, CHTBSptspp, DHAPT, FRUpts2pp, FRUptspp, GALTptspp, GAMptspp, GLCptspp, MALTptspp, MANGLYCptspp, MANptspp, MNLptspp, SBTptspp, SUCptspp, TREptspp
9657	-49.5361	EX_succ_e	10.8056	-10	0.0694611	4	30.0575	-13.0428	25.8624	-3.81046	8.00562	b2415, b0849, b3738, b4230	2DGLCptspp, ACGAptspp, ACMANAptspp, ACMUMptspp, ARBTptspp, ASCBptspp, ATPS4rpp, CELBpts, CHTBSptspp, DHAPT, FRUpts2pp, FRUptspp, GALTptspp, GAMptspp, GLCptspp, MALTptspp, MANGLYCptspp, MANptspp, MNLptspp, SBTptspp, SUCptspp, TREptspp
9658	-49.5361	EX_succ_e	10.8056	-10	0.0694611	4	30.0575	-13.0428	25.8624	-3.81046	8.00562	b3925, b2415, b2727, b3738	2DGLCptspp, ACGAptspp, ACMANAptspp, ACMUMptspp, ARBTptspp, ASCBptspp, ATPS4rpp, CELBpts, CHTBSptspp, DHAPT, FRUpts2pp, FRUptspp, GALTptspp, GAMptspp, GLCptspp, MALTptspp, MANGLYCptspp, MANptspp, MNLptspp, SBTptspp, SUCptspp, TREptspp
9659	-49.5361	EX_succ_e	10.8056	-10	0.0694611	4	30.0575	-13.0428	25.8624	-3.81046	8.00562	b2415, b2918, b3732, b3738	2DGLCptspp, ACGAptspp, ACMANAptspp, ACMUMptspp, ARBTptspp, ASCBptspp, ATPS4rpp, CELBpts, CHTBSptspp, DHAPT, FRUpts2pp, FRUptspp, GALTptspp, GAMptspp, GLCptspp, MALTptspp, MANGLYCptspp, MANptspp, MNLptspp, SBTptspp, SUCptspp, TREptspp
9660	-49.5361	EX_succ_e	10.8056	-10	0.0694611	4	30.0575	-13.0428	25.8624	-3.81046	8.00562	b2415, b3736, b2934, b2552	2DGLCptspp, ACGAptspp, ACMANAptspp, ACMUMptspp, ARBTptspp, ASCBptspp, ATPS4rpp, CELBpts, CHTBSptspp, DHAPT, FRUpts2pp, FRUptspp, GALTptspp, GAMptspp, GLCptspp, MALTptspp, MANGLYCptspp, MANptspp, MNLptspp, NODOx, NODOy, SBTptspp, SUCptspp, TREptspp
9661	-49.5361	EX_succ_e	10.8056	-10	0.0694611	4	30.0575	-13.0428	25.8624	-3.81046	8.00562	b0895, b2415, b0123, b3732	2DGLCptspp, ACGAptspp, ACMANAptspp, ACMUMptspp, ARBTptspp, ASCBptspp, ATPS4rpp, CELBpts, CHTBSptspp, CU1Opp, DHAPT, DMSOR2, FRUpts2pp, FRUptspp, GALTptspp, GAMptspp, GLCptspp, MALTptspp, MANGLYCptspp, MANptspp, MNLptspp, SBTptspp, SUCptspp, TMAOR2, TREptspp
9662	-49.5361	EX_succ_e	10.8056	-10	0.0694611	4	30.0575	-13.0428	25.8624	-3.81046	8.00562	b2415, b3736, b3750, b2147	2DGLCptspp, ACGAptspp, ACMANAptspp, ACMUMptspp, ARBTptspp, ASCBptspp, ATPS4rpp, CELBpts, CHTBSptspp, DHAPT, DURADx, FRUpts2pp, FRUptspp, GALTptspp, GAMptspp, GLCptspp, MALTptspp, MANGLYCptspp, MANptspp, MNLptspp, SBTptspp, SUCptspp, TREptspp
9663	-49.5361	EX_succ_e	10.8056	-10	0.0694611	4	30.0575	-13.0428	25.8624	-3.81046	8.00562	b0638, b2415, b0825, b3732	2DGLCptspp, ACGAptspp, ACMANAptspp, ACMUMptspp, ARBTptspp, ASCBptspp, ATPS4rpp, CELBpts, CHTBSptspp, DHAPT, FRUpts2pp, FRUptspp, GALTptspp, GAMptspp, GLCptspp, MALTptspp, MANGLYCptspp, MANptspp, MNLptspp, RZ5PP, SBTptspp, SUCptspp, TREptspp
9664	-49.5361	EX_succ_e	10.8056	-10	0.0694611	4	30.0575	-13.0428	25.8624	-3.81046	8.00562	b2415, b0996, b2483, b3732	2DGLCptspp, ACGAptspp, ACMANAptspp, ACMUMptspp, ARBTptspp, ASCBptspp, ATPS4rpp, CELBpts, CHTBSptspp, DHAPT, FRUpts2pp, FRUptspp, GALTptspp, GAMptspp, GLCptspp, MALTptspp, MANGLYCptspp, MANptspp, MNLptspp, SBTptspp, SUCptspp, TREptspp
9665	-49.5361	EX_succ_e	10.8056	-10	0.0694611	4	30.0575	-13.0428	25.8624	-3.81046	8.00562	b2708, b2415, b3738, b0810	2DGLCptspp, ACGAptspp, ACMANAptspp, ACMUMptspp, ARBTptspp, ASCBptspp, ATPS4rpp, CELBpts, CHTBSptspp, DHAPT, FRUpts2pp, FRUptspp, GALTptspp, GAMptspp, GLCptspp, GLNabcpp, MALTptspp, MANGLYCptspp, MANptspp, MNLptspp, SBTptspp, SUCptspp, TREptspp
9666	-49.5361	EX_succ_e	10.8056	-10	0.0694611	4	30.0575	-13.0428	25.8624	-3.81046	8.00562	b2415, b1033, b3732, b4033	14GLUCANabcpp, 2DGLCptspp, ACGAptspp, ACMANAptspp, ACMUMptspp, ARBTptspp, ASCBptspp, ATPS4rpp, CELBpts, CHTBSptspp, DHAPT, FRUpts2pp, FRUptspp, GALTptspp, GAMptspp, GLCptspp, MALTHXabcpp, MALTPTabcpp, MALTTRabcpp, MALTTTRabcpp, MALTabcpp, MALTptspp, MANGLYCptspp, MANptspp, MNLptspp, SBTptspp, SUCptspp, TREptspp
9667	-49.5361	EX_succ_e	10.8056	-10	0.0694611	4	30.0575	-13.0428	25.8624	-3.81046	8.00562	b1732, b2415, b2484, b3732	2DGLCptspp, ACGAptspp, ACMANAptspp, ACMUMptspp, ARBTptspp, ASCBptspp, ATPS4rpp, CELBpts, CHTBSptspp, DHAPT, FRUpts2pp, FRUptspp, GALTptspp, GAMptspp, GLCptspp, MALTptspp, MANGLYCptspp, MANptspp, MNLptspp, SBTptspp, SUCptspp, TREptspp
9668	-49.5361	EX_succ_e	10.8056	-10	0.0694611	4	30.0575	-13.0428	25.8624	-3.81046	8.00562	b2415, b3567, b3736, b1616	2DGLCptspp, ACGAptspp, ACMANAptspp, ACMUMptspp, ARBTptspp, ASCBptspp, ATPS4rpp, CELBpts, CHTBSptspp, DHAPT, FRUpts2pp, FRUptspp, GALTptspp, GAMptspp, GLCptspp, MALTptspp, MANGLYCptspp, MANptspp, METGLCURt2pp, MNLptspp, SBTptspp, SUCptspp, TREptspp, XYLabcpp
9669	-49.5361	EX_succ_e	10.8056	-10	0.0694611	4	30.0575	-13.0428	25.8624	-3.81046	8.00562	b2415, b0849, b3736, b1856	2DGLCptspp, ACGAptspp, ACMANAptspp, ACMUMptspp, ARBTptspp, ASCBptspp, ATPS4rpp, CELBpts, CHTBSptspp, DHAPT, FRUpts2pp, FRUptspp, GALTptspp, GAMptspp, GLCptspp, MALTptspp, MANGLYCptspp, MANptspp, MNLptspp, SBTptspp, SUCptspp, TREptspp
9670	-49.5361	EX_succ_e	10.8056	-10	0.0694611	4	30.0575	-13.0428	25.8624	-3.81046	8.00562	b2415, b1467, b3732, b3493	2DGLCptspp, ACGAptspp, ACMANAptspp, ACMUMptspp, ARBTptspp, ASCBptspp, ATPS4rpp, CELBpts, CHTBSptspp, DHAPT, FRUpts2pp, FRUptspp, GALTptspp, GAMptspp, GLCptspp, MALTptspp, MANGLYCptspp, MANptspp, MNLptspp, SBTptspp, SUCptspp, TREptspp
9671	-49.5361	EX_succ_e	10.8056	-10	0.0694611	4	30.0575	-13.0428	25.8624	-3.81046	8.00562	b0651, b2415, b3732, b0425	2DGLCptspp, ACGAptspp, ACMANAptspp, ACMUMptspp, ARBTptspp, ASCBptspp, ATPS4rpp, CELBpts, CHTBSptspp, DHAPT, FRUpts2pp, FRUptspp, GALTptspp, GAMptspp, GLCptspp, MALTptspp, MANGLYCptspp, MANptspp, MNLptspp, SBTptspp, SUCptspp, TREptspp
9672	-49.5361	EX_succ_e	10.8056	-10	0.0694611	4	30.0575	-13.0428	25.8624	-3.81046	8.00562	b3713, b2415, b0825, b3732	2DGLCptspp, ACGAptspp, ACMANAptspp, ACMUMptspp, ARBTptspp, ASCBptspp, ATPS4rpp, CELBpts, CHTBSptspp, DHAPT, FRUpts2pp, FRUptspp, GALTptspp, GAMptspp, GLCptspp, MALTptspp, MANGLYCptspp, MANptspp, MNLptspp, SBTptspp, SUCptspp, TREptspp
9673	-49.5361	EX_succ_e	10.8056	-10	0.0694611	4	30.0575	-13.0428	25.8624	-3.81046	8.00562	b2415, b1198, b2722, b3736	2DGLCptspp, ACGAptspp, ACMANAptspp, ACMUMptspp, ARBTptspp, ASCBptspp, ATPS4rpp, CELBpts, CHTBSptspp, DHAPT, FRUpts2pp, FRUptspp, GALTptspp, GAMptspp, GLCptspp, MALTptspp, MANGLYCptspp, MANptspp, MNLptspp, SBTptspp, SUCptspp, TREptspp
9674	-49.5361	EX_succ_e	10.8056	-10	0.0694611	4	30.0575	-13.0428	25.8624	-3.81046	8.00562	b2415, b2704, b3738, b4358	2DGLCptspp, ACGAptspp, ACMANAptspp, ACMUMptspp, ARBTptspp, ASCBptspp, ATPS4rpp, CELBpts, CHTBSptspp, DHAPT, FRUpts2pp, FRUptspp, GALCTLO, GALTptspp, GAMptspp, GLCptspp, MALTptspp, MANGLYCptspp, MANptspp, MNLptspp, SBTptspp, SUCptspp, TREptspp
9675	-49.5361	EX_succ_e	10.8056	-10	0.0694611	4	30.0575	-13.0428	25.8624	-3.81046	8.00562	b2415, b3589, b2423, b3736	2DGLCptspp, ACGAptspp, ACMANAptspp, ACMUMptspp, ARBTptspp, ASCBptspp, ATPS4rpp, CELBpts, CHTBSptspp, DHAPT, FRUpts2pp, FRUptspp, GALTptspp, GAMptspp, GLCptspp, MALTptspp, MANGLYCptspp, MANptspp, MNLptspp, SBTptspp, SELabcpp, SLNTabcpp, SUCptspp, TREptspp, TSULabcpp
9676	-49.5361	EX_succ_e	10.8056	-10	0.0694611	4	30.0575	-13.0428	25.8624	-3.81046	8.00562	b2415, b3738, b2302, b2895	2DGLCptspp, ACGAptspp, ACMANAptspp, ACMUMptspp, ARBTptspp, ASCBptspp, ATPS4rpp, CELBpts, CHTBSptspp, DHAPT, FRUpts2pp, FRUptspp, GALTptspp, GAMptspp, GLCptspp, MALTptspp, MANGLYCptspp, MANptspp, MNLptspp, SBTptspp, SUCptspp, TREptspp
9677	-49.5361	EX_succ_e	10.8056	-10	0.0694611	4	30.0575	-13.0428	25.8624	-3.81046	8.00562	b2415, b0822, b3736, b0353	2DGLCptspp, ACGAptspp, ACMANAptspp, ACMUMptspp, ARBTptspp, ASCBptspp, ATPS4rpp, CELBpts, CHTBSptspp, DHAPT, FRUpts2pp, FRUptspp, GALTptspp, GAMptspp, GLCptspp, HCINNMt2rpp, HPPPNt2rpp, MALTptspp, MANGLYCptspp, MANptspp, MNLptspp, SBTptspp, SUCptspp, TREptspp
9678	-49.5361	EX_succ_e	10.8056	-10	0.0694611	4	30.0575	-13.0428	25.8624	-3.81046	8.00562	b0493, b2415, b3739, b3736	2DGLCptspp, ACGAptspp, ACMANAptspp, ACMUMptspp, ARBTptspp, ASCBptspp, ATPS4rpp, CELBpts, CHTBSptspp, DHAPT, FRUpts2pp, FRUptspp, GALTptspp, GAMptspp, GLCptspp, MALTptspp, MANGLYCptspp, MANptspp, MNLptspp, SBTptspp, SUCptspp, TREptspp
9679	-49.5361	EX_succ_e	10.8056	-10	0.0694611	4	30.0575	-13.0428	25.8624	-3.81046	8.00562	b2579, b2415, b1227, b3738	2DGLCptspp, ACGAptspp, ACMANAptspp, ACMUMptspp, ARBTptspp, ASCBptspp, ATPS4rpp, CELBpts, CHTBSptspp, DHAPT, FRUpts2pp, FRUptspp, GALTptspp, GAMptspp, GLCptspp, MALTptspp, MANGLYCptspp, MANptspp, MNLptspp, SBTptspp, SUCptspp, TREptspp
9680	-49.5361	EX_succ_e	10.8056	-10	0.0694611	4	30.0575	-13.0428	25.8624	-3.81046	8.00562	b2415, b0575, b3732, b3738	2DGLCptspp, ACGAptspp, ACMANAptspp, ACMUMptspp, AGt3, ARBTptspp, ASCBptspp, ATPS4rpp, CELBpts, CHTBSptspp, CUt3, DHAPT, FRUpts2pp, FRUptspp, GALTptspp, GAMptspp, GLCptspp, MALTptspp, MANGLYCptspp, MANptspp, MNLptspp, SBTptspp, SUCptspp, TREptspp
9681	-49.5361	EX_succ_e	10.8056	-10	0.0694611	4	30.0575	-13.0428	25.8624	-3.81046	8.00562	b1588, b2415, b3738, b2302	2DGLCptspp, ACGAptspp, ACMANAptspp, ACMUMptspp, ARBTptspp, ASCBptspp, ATPS4rpp, CELBpts, CHTBSptspp, DHAPT, FRUpts2pp, FRUptspp, GALTptspp, GAMptspp, GLCptspp, MALTptspp, MANGLYCptspp, MANptspp, MNLptspp, SBTptspp, SELR, SUCptspp, TREptspp
9682	-49.5361	EX_succ_e	10.8056	-10	0.0694611	4	30.0575	-13.0428	25.8624	-3.81046	8.00562	b4269, b2053, b2415, b3732	2DGLCptspp, ACGAptspp, ACMANAptspp, ACMUMptspp, ARBTptspp, ASCBptspp, ATPS4rpp, CELBpts, CHTBSptspp, DHAPT, FRUpts2pp, FRUptspp, GALTptspp, GAMptspp, GLCptspp, GMAND, MALTptspp, MANGLYCptspp, MANptspp, MNLptspp, SBTptspp, SUCptspp, TREptspp
9683	-49.5361	EX_succ_e	10.8056	-10	0.0694611	4	30.0575	-13.0428	25.8624	-3.81046	8.00562	b2415, b3736, b2027, b2794	2DGLCptspp, ACGAptspp, ACMANAptspp, ACMUMptspp, ARBTptspp, ASCBptspp, ATPS4rpp, CDGR, CELBpts, CHTBSptspp, DHAPT, FRUpts2pp, FRUptspp, GALTptspp, GAMptspp, GLCptspp, MALTptspp, MANGLYCptspp, MANptspp, MNLptspp, O16AP1pp, O16AP2pp, O16AP3pp, SBTptspp, SUCptspp, TREptspp
9684	-49.5361	EX_succ_e	10.8056	-10	0.0694611	4	30.0575	-13.0428	25.8624	-3.81046	8.00562	b0638, b2415, b3063, b3732	2DGLCptspp, ACGAptspp, ACMANAptspp, ACMUMptspp, ARBTptspp, ASCBptspp, ATPS4rpp, CELBpts, CHTBSptspp, DHAPT, FRUpts2pp, FRUptspp, GALTptspp, GAMptspp, GLCptspp, MALTptspp, MANGLYCptspp, MANptspp, MNLptspp, RZ5PP, SBTptspp, SUCptspp, TARTRt7pp, TREptspp
9685	-49.5361	EX_succ_e	10.8056	-10	0.0694611	4	30.0575	-13.0428	25.8624	-3.81046	8.00562	b2415, b3738, b4086, b0070	2DGLCptspp, ACGAptspp, ACMANAptspp, ACMUMptspp, ALLabcpp, ARBTptspp, ASCBptspp, ATPS4rpp, CELBpts, CHTBSptspp, DHAPT, FRUpts2pp, FRUptspp, GALTptspp, GAMptspp, GLCptspp, MALTptspp, MANGLYCptspp, MANptspp, MNLptspp, SBTptspp, SUCptspp, TREptspp
9686	-49.5361	EX_succ_e	10.8056	-10	0.0694611	4	30.0575	-13.0428	25.8624	-3.81046	8.00562	b2415, b3732, b1125, b2014	2DGLCptspp, ACGAptspp, ACMANAptspp, ACMUMptspp, ARBTptspp, ASCBptspp, ATPS4rpp, CELBpts, CHTBSptspp, DHAPT, FRUpts2pp, FRUptspp, GALTptspp, GAMptspp, GLCptspp, MALTptspp, MANGLYCptspp, MANptspp, MNLptspp, SBTptspp, SUCptspp, TREptspp
9687	-49.5361	EX_succ_e	10.8056	-10	0.0694611	4	30.0575	-13.0428	25.8624	-3.81046	8.00562	b2415, b3736, b1021, b0597	2DGLCptspp, 3HBZCT, ACGAptspp, ACMANAptspp, ACMUMptspp, ARBTptspp, ASCBptspp, ATPS4rpp, CELBpts, CHTBSptspp, DHAPT, FRUpts2pp, FRUptspp, GALTptspp, GAMptspp, GLCptspp, MALTptspp, MANGLYCptspp, MANptspp, MNLptspp, PUACGAMS, PUACGAMtr, SBTptspp, SUCptspp, TREptspp
9688	-49.5361	EX_succ_e	10.8056	-10	0.0694611	4	30.0575	-13.0428	25.8624	-3.81046	8.00562	b2415, b2052, b3738, b2877	2DGLCptspp, ACGAptspp, ACMANAptspp, ACMUMptspp, ARBTptspp, ASCBptspp, ATPS4rpp, CELBpts, CHTBSptspp, DHAPT, FRUpts2pp, FRUptspp, GALTptspp, GAMptspp, GDMANE, GLCptspp, GOFUCR, MALTptspp, MANGLYCptspp, MANptspp, MNLptspp, MOCDS, SBTptspp, SUCptspp, TREptspp
9689	-49.5361	EX_succ_e	10.8056	-10	0.0694611	4	30.0575	-13.0428	25.8624	-3.81046	8.00562	b2415, b3736, b2965, b2701	2DGLCptspp, ACGAptspp, ACMANAptspp, ACMUMptspp, ARBTptspp, ASCBptspp, ATPS4rpp, CELBpts, CHTBSptspp, DHAPT, FRUpts2pp, FRUptspp, GALTptspp, GAMptspp, GLCptspp, MALTptspp, MANGLYCptspp, MANptspp, MNLptspp, SBTptspp, SUCptspp, TREptspp
9690	-49.5361	EX_succ_e	10.8056	-10	0.0694611	4	30.0575	-13.0428	25.8624	-3.81046	8.00562	b0493, b2415, b3738, b0315	2DGLCptspp, ACGAptspp, ACMANAptspp, ACMUMptspp, ARBTptspp, ASCBptspp, ATPS4rpp, CELBpts, CHTBSptspp, DHAPT, FRUpts2pp, FRUptspp, GALTptspp, GAMptspp, GLCptspp, MALTptspp, MANGLYCptspp, MANptspp, MNLptspp, SBTptspp, SUCptspp, TREptspp
9691	-49.5361	EX_succ_e	10.8056	-10	0.0694611	4	30.0575	-13.0428	25.8624	-3.81046	8.00562	b0446, b2415, b4014, b3732	2DGLCptspp, ACGAptspp, ACMANAptspp, ACMUMptspp, ARBTptspp, ASCBptspp, ATPS4rpp, CELBpts, CHTBSptspp, DHAPT, FRUpts2pp, FRUptspp, GALTptspp, GAMptspp, GLCptspp, MALTptspp, MANGLYCptspp, MANptspp, MNLptspp, SBTptspp, SUCptspp, TREptspp
9692	-49.5361	EX_succ_e	10.8056	-10	0.0694611	4	30.0575	-13.0428	25.8624	-3.81046	8.00562	b2415, b1873, b3736, b0789	2DGLCptspp, ACGAptspp, ACMANAptspp, ACMUMptspp, ARBTptspp, ASCBptspp, ATPS4rpp, CELBpts, CHTBSptspp, DHAPT, DMSOR1pp, DMSOR2pp, FRUpts2pp, FRUptspp, GALTptspp, GAMptspp, GLCptspp, MALTptspp, MANGLYCptspp, MANptspp, MNLptspp, SBTptspp, SUCptspp, TREptspp
9693	-49.5361	EX_succ_e	10.8056	-10	0.0694611	4	30.0575	-13.0428	25.8624	-3.81046	8.00562	b2415, b0752, b3736, b0650	2DGLCptspp, ACGAptspp, ACMANAptspp, ACMUMptspp, ARBTptspp, ASCBptspp, ATPS4rpp, CELBpts, CHTBSptspp, DHAPT, FRUpts2pp, FRUptspp, GALTptspp, GAMptspp, GLCptspp, MALTptspp, MANGLYCptspp, MANptspp, MNLptspp, SBTptspp, SUCptspp, TREptspp
9694	-49.5361	EX_succ_e	10.8056	-10	0.0694611	4	30.0575	-13.0428	25.8624	-3.81046	8.00562	b2662, b2415, b3732, b3829	2DGLCptspp, ACGAptspp, ACMANAptspp, ACMUMptspp, ARBTptspp, ASCBptspp, ATPS4rpp, CELBpts, CHTBSptspp, DHAPT, FRUpts2pp, FRUptspp, GALTptspp, GAMptspp, GLCptspp, MALTptspp, MANGLYCptspp, MANptspp, MNLptspp, SBTptspp, SUCptspp, TREptspp
9695	-49.5361	EX_succ_e	10.8056	-10	0.0694611	4	30.0575	-13.0428	25.8624	-3.81046	8.00562	b2415, b3736, b4386, b2682	2DGLCptspp, ACGAptspp, ACMANAptspp, ACMUMptspp, ARBTptspp, ASCBptspp, ATPS4rpp, CELBpts, CHTBSptspp, DHAPT, FRUpts2pp, FRUptspp, GALTptspp, GAMptspp, GLCptspp, LIPAMPL, LIPATPT, MALTptspp, MANGLYCptspp, MANptspp, MNLptspp, OCTNLL, SBTptspp, SUCptspp, TREptspp
9696	-49.5361	EX_succ_e	10.8056	-10	0.0694611	4	30.0575	-13.0428	25.8624	-3.81046	8.00562	b4039, b2415, b3738, b2994	2DGLCptspp, ACGAptspp, ACMANAptspp, ACMUMptspp, ARBTptspp, ASCBptspp, ATPS4rpp, CELBpts, CHTBSptspp, DHAPT, FRUpts2pp, FRUptspp, GALTptspp, GAMptspp, GLCptspp, MALTptspp, MANGLYCptspp, MANptspp, MNLptspp, SBTptspp, SUCptspp, TREptspp
9697	-49.5361	EX_succ_e	10.8056	-10	0.0694611	4	30.0575	-13.0428	25.8624	-3.81046	8.00562	b3003, b0125, b2415, b3732	2DGLCptspp, ACGAptspp, ACMANAptspp, ACMUMptspp, ARBTptspp, ASCBptspp, ATPS4rpp, CELBpts, CHTBSptspp, DHAPT, FRUpts2pp, FRUptspp, GALTptspp, GAMptspp, GLCptspp, MALTptspp, MANGLYCptspp, MANptspp, MNLptspp, SBTptspp, SUCptspp, TREptspp
9698	-49.5361	EX_succ_e	10.8056	-10	0.0694611	4	30.0575	-13.0428	25.8624	-3.81046	8.00562	b3952, b2415, b3732, b0811	2DGLCptspp, ACGAptspp, ACMANAptspp, ACMUMptspp, ARBTptspp, ASCBptspp, ATPS4rpp, CELBpts, CHTBSptspp, DHAPT, FRUpts2pp, FRUptspp, GALTptspp, GAMptspp, GLCptspp, GLNabcpp, MALTptspp, MANGLYCptspp, MANptspp, MNLptspp, SBTptspp, SUCptspp, TREptspp
9699	-49.5361	EX_succ_e	10.8056	-10	0.0694611	4	30.0575	-13.0428	25.8624	-3.81046	8.00562	b3564, b2415, b4471, b3736	2DGLCptspp, ACGAptspp, ACMANAptspp, ACMUMptspp, ARBTptspp, ASCBptspp, ATPS4rpp, CELBpts, CHTBSptspp, DHAPT, DXYLK, FRUpts2pp, FRUptspp, GALTptspp, GAMptspp, GLCptspp, MALTptspp, MANGLYCptspp, MANptspp, MNLptspp, SBTptspp, SUCptspp, TREptspp
9700	-49.5361	EX_succ_e	10.8056	-10	0.0694611	4	30.0575	-13.0428	25.8624	-3.81046	8.00562	b2415, b3738, b4085, b2710	2DGLCptspp, ACGAptspp, ACMANAptspp, ACMUMptspp, ALLULPE, ARBTptspp, ASCBptspp, ATPS4rpp, CELBpts, CHTBSptspp, DHAPT, FRUpts2pp, FRUptspp, GALTptspp, GAMptspp, GLCptspp, MALTptspp, MANGLYCptspp, MANptspp, MNLptspp, NHFRBO, SBTptspp, SUCptspp, TREptspp
9701	-49.5361	EX_succ_e	10.8056	-10	0.0694611	4	30.0575	-13.0428	25.8624	-3.81046	8.00562	b2251, b2415, b3736, b3599	2DGLCptspp, ACGAptspp, ACMANAptspp, ACMUMptspp, ARBTptspp, ASCBptspp, ATPS4rpp, CELBpts, CHTBSptspp, DHAPT, FRUpts2pp, FRUptspp, GALTptspp, GAMptspp, GLCptspp, MALTptspp, MANGLYCptspp, MANptspp, MNLptspp, SBTptspp, SUCptspp, TREptspp
9702	-49.5361	EX_succ_e	10.8056	-10	0.0694611	4	30.0575	-13.0428	25.8624	-3.81046	8.00562	b2415, b2882, b3738, b2010	2DGLCptspp, ACGAptspp, ACMANAptspp, ACMUMptspp, ARBTptspp, ASCBptspp, ATPS4rpp, CELBpts, CHTBSptspp, DHAPT, FRUpts2pp, FRUptspp, GALTptspp, GAMptspp, GLCptspp, MALTptspp, MANGLYCptspp, MANptspp, MNLptspp, SBTptspp, SUCptspp, TREptspp
9703	-49.5361	EX_succ_e	10.8056	-10	0.0694611	4	30.0575	-13.0428	25.8624	-3.81046	8.00562	b1106, b2415, b3736, b1483	2DGLCptspp, ACGAptspp, ACMANAptspp, ACMUMptspp, ARBTptspp, ASCBptspp, ATPS4rpp, CELBpts, CHTBSptspp, DHAPT, FRUpts2pp, FRUptspp, GALTptspp, GAMptspp, GLCptspp, MALTptspp, MANGLYCptspp, MANptspp, MNLptspp, SBTptspp, SUCptspp, TMK, TREptspp
9704	-49.5361	EX_succ_e	10.8056	-10	0.0694611	4	30.0575	-13.0428	25.8624	-3.81046	8.00562	b2415, b0352, b3736, b3479	2DGLCptspp, ACGAptspp, ACMANAptspp, ACMUMptspp, ARBTptspp, ASCBptspp, ATPS4rpp, CELBpts, CHTBSptspp, DHAPT, FRUpts2pp, FRUptspp, GALTptspp, GAMptspp, GLCptspp, HOPNTAL, MALTptspp, MANGLYCptspp, MANptspp, MNLptspp, SBTptspp, SUCptspp, TREptspp
9705	-49.5361	EX_succ_e	10.8056	-10	0.0694611	4	30.0575	-13.0428	25.8624	-3.81046	8.00562	b2415, b1704, b4260, b3736	2DGLCptspp, ACGAptspp, ACMANAptspp, ACMUMptspp, ARBTptspp, ASCBptspp, ATPS4rpp, CELBpts, CHTBSptspp, DHAPT, FRUpts2pp, FRUptspp, GALTptspp, GAMptspp, GLCptspp, MALTptspp, MANGLYCptspp, MANptspp, MNLptspp, SBTptspp, SUCptspp, TREptspp
9706	-49.5361	EX_succ_e	10.8056	-10	0.0694611	4	30.0575	-13.0428	25.8624	-3.81046	8.00562	b3581, b2415, b3736, b3876	2DGLCptspp, ACGAptspp, ACMANAptspp, ACMUMptspp, ARBTptspp, ASCBptspp, ATPS4rpp, CELBpts, CHTBSptspp, DHAPT, FRUpts2pp, FRUptspp, GALTptspp, GAMptspp, GLCptspp, MALTptspp, MANGLYCptspp, MANptspp, MNLptspp, SBTptspp, SQtr, SUCptspp, TREptspp
9707	-49.5361	EX_succ_e	10.8056	-10	0.0694611	4	30.0575	-13.0428	25.8624	-3.81046	8.00562	b2415, b3600, b0366, b3736	2DGLCptspp, ACGAptspp, ACMANAptspp, ACMUMptspp, ARBTptspp, ASCBptspp, ATPS4rpp, CELBpts, CHTBSptspp, DHAPT, FRUpts2pp, FRUptspp, GALTptspp, GAMptspp, GLCptspp, M1PD, MALTptspp, MANGLYCptspp, MANptspp, MNLptspp, SBTptspp, SUCptspp, TAURabcpp, TREptspp
9708	-49.5361	EX_succ_e	10.8056	-10	0.0694611	4	30.0575	-13.0428	25.8624	-3.81046	8.00562	b2415, b3736, b3125, b4476	2DGLCptspp, ACGAptspp, ACMANAptspp, ACMUMptspp, ARBTptspp, ASCBptspp, ATPS4rpp, CELBpts, CHTBSptspp, DHAPT, FRUpts2pp, FRUptspp, GALTptspp, GAMptspp, GLCptspp, MALTptspp, MANGLYCptspp, MANptspp, MNLptspp, SBTptspp, SUCptspp, TREptspp
9709	-49.5361	EX_succ_e	10.8056	-10	0.0694611	4	30.0575	-13.0428	25.8624	-3.81046	8.00562	b0841, b2415, b2484, b3732	2DGLCptspp, ACGAptspp, ACMANAptspp, ACMUMptspp, ARBTptspp, ASCBptspp, ATPS4rpp, CELBpts, CHTBSptspp, DHAPT, FRUpts2pp, FRUptspp, GALTptspp, GAMptspp, GLCptspp, MALTptspp, MANGLYCptspp, MANptspp, MNLptspp, SBTptspp, SUCptspp, TREptspp
9710	-49.5361	EX_succ_e	10.8056	-10	0.0694611	4	30.0575	-13.0428	25.8624	-3.81046	8.00562	b2415, b3736, b1483, b1103	2DGLCptspp, ACGAptspp, ACMANAptspp, ACMUMptspp, ARBTptspp, ASCBptspp, ATPS4rpp, CELBpts, CHTBSptspp, DHAPT, FRUpts2pp, FRUptspp, GALTptspp, GAMptspp, GLCptspp, MALTptspp, MANGLYCptspp, MANptspp, MNLptspp, PNSPA, SBTptspp, SUCptspp, TREptspp
9711	-49.5361	EX_succ_e	10.8056	-10	0.0694611	4	30.0575	-13.0428	25.8624	-3.81046	8.00562	b2041, b2415, b3732, b2254	2DGLCptspp, ACGAptspp, ACMANAptspp, ACMUMptspp, ARBTptspp, ASCBptspp, ATPS4rpp, CELBpts, CHTBSptspp, DHAPT, FRUpts2pp, FRUptspp, GALTptspp, GAMptspp, GLCptspp, MALTptspp, MANGLYCptspp, MANptspp, MNLptspp, SBTptspp, SUCptspp, TREptspp, UPLA4FNT
9712	-49.5361	EX_succ_e	10.8056	-10	0.0694611	4	30.0575	-13.0428	25.8624	-3.81046	8.00562	b2415, b2704, b4131, b3736	2DGLCptspp, ACGAptspp, ACMANAptspp, ACMUMptspp, ARBTptspp, ASCBptspp, ATPS4rpp, CELBpts, CHTBSptspp, DHAPT, FRUpts2pp, FRUptspp, GALTptspp, GAMptspp, GLCptspp, MALTptspp, MANGLYCptspp, MANptspp, MNLptspp, SBTptspp, SUCptspp, TREptspp
9713	-49.5361	EX_succ_e	10.8056	-10	0.0694611	4	30.0575	-13.0428	25.8624	-3.81046	8.00562	b3788, b2415, b2091, b3732	2DGLCptspp, ACGAptspp, ACMANAptspp, ACMUMptspp, ARBTptspp, ASCBptspp, ATPS4rpp, CELBpts, CHTBSptspp, DHAPT, FRUpts2pp, FRUptspp, GALTptspp, GAMptspp, GLCptspp, GLTPD, MALTptspp, MANGLYCptspp, MANptspp, MNLptspp, SBTptspp, SUCptspp, TREptspp
9714	-49.5361	EX_succ_e	10.8056	-10	0.0694611	4	30.0575	-13.0428	25.8624	-3.81046	8.00562	b2415, b2482, b3736, b1113	2DGLCptspp, ACGAptspp, ACMANAptspp, ACMUMptspp, ARBTptspp, ASCBptspp, ATPS4rpp, CELBpts, CHTBSptspp, DHAPT, FRUpts2pp, FRUptspp, GALTptspp, GAMptspp, GLCptspp, MALTptspp, MANGLYCptspp, MANptspp, MNLptspp, SBTptspp, SUCptspp, TREptspp
9715	-49.5361	EX_succ_e	10.8056	-10	0.0694611	4	30.0575	-13.0428	25.8624	-3.81046	8.00562	b2415, b0067, b3732, b4386	2DGLCptspp, ACGAptspp, ACMANAptspp, ACMUMptspp, ARBTptspp, ASCBptspp, ATPS4rpp, CELBpts, CHTBSptspp, DHAPT, FRUpts2pp, FRUptspp, GALTptspp, GAMptspp, GLCptspp, LIPAMPL, LIPATPT, MALTptspp, MANGLYCptspp, MANptspp, MNLptspp, OCTNLL, SBTptspp, SUCptspp, THMabcpp, TREptspp
9716	-49.5361	EX_succ_e	10.8056	-10	0.0694611	4	30.0575	-13.0428	25.8624	-3.81046	8.00562	b2415, b3736, b3772, b4099	2DGLCptspp, ACGAptspp, ACMANAptspp, ACMUMptspp, ARBTptspp, ARMEPNS, ASCBptspp, ATPS4rpp, CELBpts, CHTBSptspp, DHAPT, FRUpts2pp, FRUptspp, GALTptspp, GAMptspp, GLCptspp, MALTptspp, MANGLYCptspp, MANptspp, MNLptspp, SBTptspp, SUCptspp, TREptspp
9717	-49.5361	EX_succ_e	10.8056	-10	0.0694611	4	30.0575	-13.0428	25.8624	-3.81046	8.00562	b0732, b2415, b0067, b3736	2DGLCptspp, ACGAptspp, ACMANAptspp, ACMUMptspp, ARBTptspp, ASCBptspp, ATPS4rpp, CELBpts, CHTBSptspp, DHAPT, FRUpts2pp, FRUptspp, GALTptspp, GAMptspp, GLCptspp, MALTptspp, MANGLYCptspp, MANPGH, MANptspp, MNLptspp, SBTptspp, SUCptspp, THMabcpp, TREptspp
9718	-49.5361	EX_succ_e	10.8056	-10	0.0694611	4	30.0575	-13.0428	25.8624	-3.81046	8.00562	b3475, b2415, b2601, b3732	2DGLCptspp, ACGAptspp, ACMANAptspp, ACMUMptspp, ARBTptspp, ASCBptspp, ATPS4rpp, CELBpts, CHTBSptspp, DHAPT, FRUpts2pp, FRUptspp, GALTptspp, GAMptspp, GLCptspp, MALTptspp, MANGLYCptspp, MANptspp, MNLptspp, SBTptspp, SUCptspp, TREptspp
9719	-49.5361	EX_succ_e	10.8056	-10	0.0694611	4	30.0575	-13.0428	25.8624	-3.81046	8.00562	b2415, b3590, b3732, b1486	2DGLCptspp, ACGAptspp, ACMANAptspp, ACMUMptspp, ARBTptspp, ASCBptspp, ATPS4rpp, CELBpts, CHTBSptspp, DHAPT, FRUpts2pp, FRUptspp, GALTptspp, GAMptspp, GLCptspp, MALTptspp, MANGLYCptspp, MANptspp, MNLptspp, SBTptspp, SUCptspp, TREptspp
9720	-49.5361	EX_succ_e	10.8056	-10	0.0694611	4	30.0575	-13.0428	25.8624	-3.81046	8.00562	b2415, b3736, b0451, b3715	2DGLCptspp, ACGAptspp, ACMANAptspp, ACMUMptspp, ARBTptspp, ASCBptspp, ATPS4rpp, CELBpts, CHTBSptspp, DHAPT, FRUpts2pp, FRUptspp, GALTptspp, GAMptspp, GLCptspp, MALTptspp, MANGLYCptspp, MANptspp, MNLptspp, SBTptspp, SUCptspp, TREptspp
9721	-49.5361	EX_succ_e	10.8056	-10	0.0694611	4	30.0575	-13.0428	25.8624	-3.81046	8.00562	b3057, b2415, b4471, b3736	2DGLCptspp, ACGAptspp, ACMANAptspp, ACMUMptspp, ARBTptspp, ASCBptspp, ATPS4rpp, CELBpts, CHTBSptspp, DHAPT, FRUpts2pp, FRUptspp, GALTptspp, GAMptspp, GLCptspp, MALTptspp, MANGLYCptspp, MANptspp, MNLptspp, SBTptspp, SUCptspp, TREptspp
9722	-49.5361	EX_succ_e	10.8056	-10	0.0694611	4	30.0575	-13.0428	25.8624	-3.81046	8.00562	b2708, b2415, b3736, b3496	2DGLCptspp, ACGAptspp, ACMANAptspp, ACMUMptspp, ARBTptspp, ASCBptspp, ATPS4rpp, CELBpts, CHTBSptspp, DHAPT, FRUpts2pp, FRUptspp, GALTptspp, GAMptspp, GLCptspp, MALTptspp, MANGLYCptspp, MANptspp, MNLptspp, SBTptspp, SUCptspp, TREptspp
9723	-49.5361	EX_succ_e	10.8056	-10	0.0694611	4	30.0575	-13.0428	25.8624	-3.81046	8.00562	b2415, b3738, b4090, b4093	2DGLCptspp, ACGAptspp, ACMANAptspp, ACMUMptspp, ALLPI, AMPNTAT, ARBTptspp, ASCBptspp, ATPS4rpp, CELBpts, CHTBSptspp, DHAPT, FRUpts2pp, FRUptspp, GALTptspp, GAMptspp, GLCptspp, MALTptspp, MANGLYCptspp, MANptspp, MNLptspp, SBTptspp, SUCptspp, TREptspp
9724	-49.5361	EX_succ_e	10.8056	-10	0.0694611	4	30.0575	-13.0428	25.8624	-3.81046	8.00562	b2415, b0935, b2484, b3732	2DGLCptspp, ACGAptspp, ACMANAptspp, ACMUMptspp, ARBTptspp, ASCBptspp, ATPS4rpp, CELBpts, CHTBSptspp, DHAPT, FDMO, FDMO2, FDMO3, FDMO4, FDMO6, FRUpts2pp, FRUptspp, GALTptspp, GAMptspp, GLCptspp, MALTptspp, MANGLYCptspp, MANptspp, MNLptspp, SBTptspp, SUCptspp, TREptspp
9725	-49.5361	EX_succ_e	10.8056	-10	0.0694611	4	30.0575	-13.0428	25.8624	-3.81046	8.00562	b2415, b3732, b0681, b0819	2DGLCptspp, ACGAptspp, ACMANAptspp, ACMUMptspp, ARBTptspp, ASCBptspp, ATPS4rpp, CELBpts, CHTBSptspp, DHAPT, FRUpts2pp, FRUptspp, GALTptspp, GAMptspp, GLCptspp, MALTptspp, MANGLYCptspp, MANptspp, MNLptspp, SBTptspp, SUCptspp, TREptspp
9726	-49.5361	EX_succ_e	10.8056	-10	0.0694611	4	30.0575	-13.0428	25.8624	-3.81046	8.00562	b2415, b0241, b3732, b0624	2DGLCptspp, ACGAptspp, ACMANAptspp, ACMUMptspp, ARBTptspp, ASCBptspp, ATPS4rpp, CELBpts, CHTBSptspp, DHAPT, FRUpts2pp, FRUptspp, Ftpp, GALTptspp, GAMptspp, GLCptspp, MALTptspp, MANGLYCptspp, MANptspp, MNLptspp, SBTptspp, SUCptspp, TREptspp
9727	-49.5361	EX_succ_e	10.8056	-10	0.0694611	4	30.0575	-13.0428	25.8624	-3.81046	8.00562	b2415, b0123, b3736, b1484	2DGLCptspp, ACGAptspp, ACMANAptspp, ACMUMptspp, ARBTptspp, ASCBptspp, ATPS4rpp, CELBpts, CHTBSptspp, CU1Opp, DHAPT, FRUpts2pp, FRUptspp, GALTptspp, GAMptspp, GLCptspp, MALTptspp, MANGLYCptspp, MANptspp, MNLptspp, SBTptspp, SUCptspp, TREptspp
9728	-49.5361	EX_succ_e	10.8056	-10	0.0694611	4	30.0575	-13.0428	25.8624	-3.81046	8.00562	b2415, b0997, b3736, b0808	2DGLCptspp, ACGAptspp, ACMANAptspp, ACMUMptspp, ARBTptspp, ASCBptspp, ATPS4rpp, CELBpts, CHTBSptspp, DHAPT, FRUpts2pp, FRUptspp, GALTptspp, GAMptspp, GLCptspp, MALTptspp, MANGLYCptspp, MANptspp, MNLptspp, SBTptspp, SUCptspp, TREptspp
9729	-49.5361	EX_succ_e	10.8056	-10	0.0694611	4	30.0575	-13.0428	25.8624	-3.81046	8.00562	b2415, b3577, b3736, b2877	23DOGULNt4pp, 2DGLCptspp, ACGAptspp, ACMANAptspp, ACMUMptspp, ARBTptspp, ASCBptspp, ATPS4rpp, CELBpts, CHTBSptspp, DHAPT, FRUpts2pp, FRUptspp, GALTptspp, GAMptspp, GLCptspp, MALTptspp, MANGLYCptspp, MANptspp, MNLptspp, MOCDS, SBTptspp, SUCptspp, TREptspp, XYLUt2pp
9730	-49.5361	EX_succ_e	10.8056	-10	0.0694611	4	30.0575	-13.0428	25.8624	-3.81046	8.00562	b0340, b2415, b3738, b4485	2DGLCptspp, ACGAptspp, ACMANAptspp, ACMUMptspp, ARBTptspp, ASCBptspp, ATPS4rpp, CELBpts, CHTBSptspp, CYNTAH, DHAPT, FRUpts2pp, FRUptspp, GALTptspp, GAMptspp, GLCptspp, MALTptspp, MANGLYCptspp, MANptspp, MNLptspp, SBTptspp, SUCptspp, TREptspp
9731	-49.5361	EX_succ_e	10.8056	-10	0.0694611	4	30.0575	-13.0428	25.8624	-3.81046	8.00562	b2415, b3732, b3737, b3502	2DGLCptspp, ACGAptspp, ACMANAptspp, ACMUMptspp, ARBTptspp, ASCBptspp, ASO3t8pp, ATPS4rpp, CELBpts, CHTBSptspp, DHAPT, FRUpts2pp, FRUptspp, GALTptspp, GAMptspp, GLCptspp, MALTptspp, MANGLYCptspp, MANptspp, MNLptspp, SBTptspp, SUCptspp, TREptspp
9732	-49.5361	EX_succ_e	10.8056	-10	0.0694611	4	30.0575	-13.0428	25.8624	-3.81046	8.00562	b2415, b2797, b2417, b3736	2DGLCptspp, ACGAptspp, ACMANAptspp, ACMUMptspp, ARBTptspp, ASCBptspp, ATPS4rpp, CELBpts, CHTBSptspp, DHAPT, FRUpts2pp, FRUptspp, GALTptspp, GAMptspp, GLCptspp, MALTptspp, MANGLYCptspp, MANptspp, MNLptspp, SBTptspp, SUCptspp, TREptspp
9733	-49.5361	EX_succ_e	10.8056	-10	0.0694611	4	30.0575	-13.0428	25.8624	-3.81046	8.00562	b2415, b3738, b2934, b0269	2DGLCptspp, ACGAptspp, ACMANAptspp, ACMUMptspp, ARBTptspp, ASCBptspp, ATPS4rpp, CELBpts, CHTBSptspp, DHAPT, FRUpts2pp, FRUptspp, GALTptspp, GAMptspp, GLCptspp, MALTptspp, MANGLYCptspp, MANptspp, MNLptspp, SBTptspp, SUCptspp, TREptspp
9734	-49.5361	EX_succ_e	10.8056	-10	0.0694611	4	30.0575	-13.0428	25.8624	-3.81046	8.00562	b2415, b0863, b4194, b3732	2DGLCptspp, ACGAptspp, ACMANAptspp, ACMUMptspp, ARBTptspp, ASCBptspp, ATPS4rpp, CELBpts, CHTBSptspp, DHAPT, FRUpts2pp, FRUptspp, GALTptspp, GAMptspp, GLCptspp, MALTptspp, MANGLYCptspp, MANptspp, MNLptspp, SBTptspp, SUCptspp, TREptspp
9735	-49.5361	EX_succ_e	10.8056	-10	0.0694611	4	30.0575	-13.0428	25.8624	-3.81046	8.00562	b2415, b0067, b3738, b3894	2DGLCptspp, ACGAptspp, ACMANAptspp, ACMUMptspp, ARBTptspp, ASCBptspp, ATPS4rpp, CELBpts, CHTBSptspp, DHAPT, FRUpts2pp, FRUptspp, GALTptspp, GAMptspp, GLCptspp, MALTptspp, MANGLYCptspp, MANptspp, MNLptspp, SBTptspp, SUCptspp, THMabcpp, TREptspp
9736	-49.5361	EX_succ_e	10.8056	-10	0.0694611	4	30.0575	-13.0428	25.8624	-3.81046	8.00562	b2415, b2173, b3385, b3738	2DGLCptspp, ACGAptspp, ACMANAptspp, ACMUMptspp, ARBTptspp, ASCBptspp, ATPS4rpp, CELBpts, CHTBSptspp, DHAPT, FRUpts2pp, FRUptspp, GALTptspp, GAMptspp, GLCptspp, MALTptspp, MANGLYCptspp, MANptspp, MNLptspp, PGLYCP, SBTptspp, SUCptspp, TREptspp
9737	-49.5361	EX_succ_e	10.8056	-10	0.0694611	4	30.0575	-13.0428	25.8624	-3.81046	8.00562	b0002, b3713, b2415, b3738	2DGLCptspp, ACGAptspp, ACMANAptspp, ACMUMptspp, ARBTptspp, ASCBptspp, ATPS4rpp, CELBpts, CHTBSptspp, DHAPT, FRUpts2pp, FRUptspp, GALTptspp, GAMptspp, GLCptspp, MALTptspp, MANGLYCptspp, MANptspp, MNLptspp, SBTptspp, SUCptspp, TREptspp
9738	-49.5361	EX_succ_e	10.8056	-10	0.0694611	4	30.0575	-13.0428	25.8624	-3.81046	8.00562	b2415, b3679, b3732, b0604	2DGLCptspp, ACGAptspp, ACMANAptspp, ACMUMptspp, ARBTptspp, ASCBptspp, ATPS4rpp, CELBpts, CHTBSptspp, DHAPT, DSBGGT, FRUpts2pp, FRUptspp, GALTptspp, GAMptspp, GLCptspp, INOSTt4pp, MALTptspp, MANGLYCptspp, MANptspp, MNLptspp, SBTptspp, SUCptspp, TDSR2, TREptspp
9739	-49.5361	EX_succ_e	10.8056	-10	0.0694611	4	30.0575	-13.0428	25.8624	-3.81046	8.00562	b2415, b3736, b3612, b1400	2DGLCptspp, 2HPTCOAT, ACGAptspp, ACMANAptspp, ACMUMptspp, ARBTptspp, ASCBptspp, ATPS4rpp, CELBpts, CHTBSptspp, DHAPT, FRUpts2pp, FRUptspp, GALTptspp, GAMptspp, GLCptspp, MALTptspp, MANGLYCptspp, MANptspp, MNLptspp, SBTptspp, SUCptspp, TREptspp
9740	-49.5361	EX_succ_e	10.8056	-10	0.0694611	4	30.0575	-13.0428	25.8624	-3.81046	8.00562	b2293, b2415, b3736, b1655	2DGLCptspp, ACGAptspp, ACMANAptspp, ACMUMptspp, ARBTptspp, ASCBptspp, ATPS4rpp, CELBpts, CHTBSptspp, DHAPT, FRUpts2pp, FRUptspp, GALTptspp, GAMptspp, GLCptspp, MALTptspp, MANGLYCptspp, MANptspp, MNLptspp, RU5PP, SBTptspp, SUCptspp, TREptspp
9741	-49.5361	EX_succ_e	10.8056	-10	0.0694611	4	30.0575	-13.0428	25.8624	-3.81046	8.00562	b3248, b2415, b0158, b3736	2DGLCptspp, ACGAptspp, ACMANAptspp, ACMUMptspp, ADOCBLabcpp, ARBTptspp, ASCBptspp, ATPS4rpp, CBIuabcpp, CBL1abcpp, CELBpts, CHTBSptspp, DHAPT, FRUpts2pp, FRUptspp, GALTptspp, GAMptspp, GLCptspp, MALTptspp, MANGLYCptspp, MANptspp, MNLptspp, SBTptspp, SUCptspp, TREptspp
9742	-49.5361	EX_succ_e	10.8056	-10	0.0694611	4	30.0575	-13.0428	25.8624	-3.81046	8.00562	b2415, b0867, b2485, b3736	2DGLCptspp, ACGAptspp, ACMANAptspp, ACMUMptspp, ARBTptspp, ASCBptspp, ATPS4rpp, CELBpts, CHTBSptspp, DHAPT, FRUpts2pp, FRUptspp, GALTptspp, GAMptspp, GLCptspp, MALTptspp, MANGLYCptspp, MANptspp, MNLptspp, SBTptspp, SUCptspp, TREptspp
9743	-49.5361	EX_succ_e	10.8056	-10	0.0694611	4	30.0575	-13.0428	25.8624	-3.81046	8.00562	b3789, b2415, b2817, b3738	2DGLCptspp, ACGAptspp, ACMANAptspp, ACMUMptspp, ARBTptspp, ASCBptspp, ATPS4rpp, CELBpts, CHTBSptspp, DHAPT, FRUpts2pp, FRUptspp, GALTptspp, GAMptspp, GLCptspp, MALTptspp, MANGLYCptspp, MANptspp, MNLptspp, SBTptspp, SUCptspp, TREptspp
9744	-49.5361	EX_succ_e	10.8056	-10	0.0694611	4	30.0575	-13.0428	25.8624	-3.81046	8.00562	b2415, b3736, b3735, b1400	2DGLCptspp, 2HPTCOAT, ACGAptspp, ACMANAptspp, ACMUMptspp, ARBTptspp, ASCBptspp, ATPS4rpp, CELBpts, CHTBSptspp, DHAPT, FRUpts2pp, FRUptspp, GALTptspp, GAMptspp, GLCptspp, MALTptspp, MANGLYCptspp, MANptspp, MNLptspp, SBTptspp, SUCptspp, TREptspp
9745	-49.5361	EX_succ_e	10.8056	-10	0.0694611	4	30.0575	-13.0428	25.8624	-3.81046	8.00562	b2415, b3397, b4193, b3732	2DGLCptspp, ACGAptspp, ACMANAptspp, ACMUMptspp, ARBTptspp, ASCBptspp, ATPS4rpp, CELBpts, CHTBSptspp, DHAPT, FRUpts2pp, FRUptspp, GALTptspp, GAMptspp, GLCptspp, MALTptspp, MANGLYCptspp, MANptspp, MNLptspp, SBTptspp, SUCptspp, TREptspp
9746	-49.5361	EX_succ_e	10.8056	-10	0.0694611	4	30.0575	-13.0428	25.8624	-3.81046	8.00562	b3908, b2415, b3736, b3502	2DGLCptspp, ACGAptspp, ACMANAptspp, ACMUMptspp, ARBTptspp, ASCBptspp, ASO3t8pp, ATPS4rpp, CELBpts, CHTBSptspp, DHAPT, FRUpts2pp, FRUptspp, GALTptspp, GAMptspp, GLCptspp, MALTptspp, MANGLYCptspp, MANptspp, MNLptspp, SBTptspp, SUCptspp, TREptspp
9747	-49.5361	EX_succ_e	10.8056	-10	0.0694611	4	30.0575	-13.0428	25.8624	-3.81046	8.00562	b3781, b2415, b2202, b3732	2DGLCptspp, ACGAptspp, ACMANAptspp, ACMUMptspp, ARBTptspp, ASCBptspp, ATPS4rpp, CELBpts, CHTBSptspp, DHAPT, FRUpts2pp, FRUptspp, GALTptspp, GAMptspp, GLCptspp, MALTptspp, MANGLYCptspp, MANptspp, MNLptspp, NO3R1bpp, NO3R2bpp, SBTptspp, SUCptspp, TREptspp
9748	-49.5361	EX_succ_e	10.8056	-10	0.0694611	4	30.0575	-13.0428	25.8624	-3.81046	8.00562	b2458, b2415, b0367, b3738	2DGLCptspp, ACGAptspp, ACMANAptspp, ACMUMptspp, ARBTptspp, ASCBptspp, ATPS4rpp, CELBpts, CHTBSptspp, DHAPT, FRUpts2pp, FRUptspp, GALTptspp, GAMptspp, GLCptspp, MALTptspp, MANGLYCptspp, MANptspp, MNLptspp, SBTptspp, SUCptspp, TAURabcpp, TREptspp
9749	-49.5361	EX_succ_e	10.8056	-10	0.0694611	4	30.0575	-13.0428	25.8624	-3.81046	8.00562	b2415, b1819, b3732, b0805	2DGLCptspp, ACGAptspp, ACMANAptspp, ACMUMptspp, ARBTptspp, ASCBptspp, ATPS4rpp, CELBpts, CHTBSptspp, DHAPT, FRUpts2pp, FRUptspp, GALTptspp, GAMptspp, GLCptspp, MALTptspp, MANGLYCptspp, MANptspp, MNLptspp, SBTptspp, SUCptspp, TREptspp
9750	-49.5361	EX_succ_e	10.8056	-10	0.0694611	4	30.0575	-13.0428	25.8624	-3.81046	8.00562	b2415, b3738, b2256, b3291	2DGLCptspp, ACGAptspp, ACMANAptspp, ACMUMptspp, ARBTptspp, ASCBptspp, ATPS4rpp, CELBpts, CHTBSptspp, DHAPT, FRUpts2pp, FRUptspp, GALTptspp, GAMptspp, GLCptspp, MALTptspp, MANGLYCptspp, MANptspp, MNLptspp, SBTptspp, SUCptspp, TREptspp, UPLA4FNF
9751	-49.5361	EX_succ_e	10.8056	-10	0.0694611	4	30.0575	-13.0428	25.8624	-3.81046	8.00562	b2415, b3616, b3736, b0341	2DGLCptspp, ACGAptspp, ACMANAptspp, ACMUMptspp, ARBTptspp, ASCBptspp, ATPS4rpp, CELBpts, CHTBSptspp, CYNTt2pp, DHAPT, FRUpts2pp, FRUptspp, GALTptspp, GAMptspp, GLCptspp, MALTptspp, MANGLYCptspp, MANptspp, MNLptspp, SBTptspp, SUCptspp, TREptspp
9752	-49.5361	EX_succ_e	10.8056	-10	0.0694611	4	30.0575	-13.0428	25.8624	-3.81046	8.00562	b2415, b1198, b3738, b3907	2DGLCptspp, ACGAptspp, ACMANAptspp, ACMUMptspp, ARBTptspp, ASCBptspp, ATPS4rpp, CELBpts, CHTBSptspp, DHAPT, FRUpts2pp, FRUptspp, GALTptspp, GAMptspp, GLCptspp, LYXt2pp, MALTptspp, MANGLYCptspp, MANptspp, MNLptspp, RMNtpp, SBTptspp, SUCptspp, TREptspp
9753	-49.5361	EX_succ_e	10.8056	-10	0.0694611	4	30.0575	-13.0428	25.8624	-3.81046	8.00562	b2415, b0485, b3732, b4085	2DGLCptspp, ACGAptspp, ACMANAptspp, ACMUMptspp, ALLULPE, ARBTptspp, ASCBptspp, ATPS4rpp, CELBpts, CHTBSptspp, DHAPT, FRUpts2pp, FRUptspp, GALTptspp, GAMptspp, GLCptspp, MALTptspp, MANGLYCptspp, MANptspp, MNLptspp, SBTptspp, SUCptspp, TREptspp
9754	-49.5361	EX_succ_e	10.8056	-10	0.0694611	4	30.0575	-13.0428	25.8624	-3.81046	8.00562	b2415, b3738, b1330, b3857	2DGLCptspp, ACGAptspp, ACMANAptspp, ACMUMptspp, ARBTptspp, ASCBptspp, ATPS4rpp, BMOGDS1, BMOGDS2, BWCOGDS1, BWCOGDS2, CELBpts, CHTBSptspp, DHAPT, FRUpts2pp, FRUptspp, GALTptspp, GAMptspp, GLCptspp, MALTptspp, MANGLYCptspp, MANptspp, MNLptspp, MOGDS, SBTptspp, SUCptspp, TREptspp
9755	-49.5361	EX_succ_e	10.8056	-10	0.0694611	4	30.0575	-13.0428	25.8624	-3.81046	8.00562	b0077, b2415, b3738, b0681	2DGLCptspp, ACGAptspp, ACMANAptspp, ACMUMptspp, ARBTptspp, ASCBptspp, ATPS4rpp, CELBpts, CHTBSptspp, DHAPT, FRUpts2pp, FRUptspp, GALTptspp, GAMptspp, GLCptspp, MALTptspp, MANGLYCptspp, MANptspp, MNLptspp, SBTptspp, SUCptspp, TREptspp
9756	-49.5361	EX_succ_e	10.8056	-10	0.0694611	4	30.0575	-13.0428	25.8624	-3.81046	8.00562	b2415, b3224, b3732, b2492	2DGLCptspp, ACGAptspp, ACMANAptspp, ACMUMptspp, ACNAMt2pp, ARBTptspp, ASCBptspp, ATPS4rpp, CELBpts, CHTBSptspp, DHAPT, FRUpts2pp, FRUptspp, GALTptspp, GAMptspp, GLCptspp, MALTptspp, MANGLYCptspp, MANptspp, MNLptspp, SBTptspp, SUCptspp, TREptspp
9757	-49.5361	EX_succ_e	10.8056	-10	0.0694611	4	30.0575	-13.0428	25.8624	-3.81046	8.00562	b0446, b4196, b2415, b3736	2DGLCptspp, ACGAptspp, ACMANAptspp, ACMUMptspp, ARBTptspp, ASCBptspp, ATPS4rpp, CELBpts, CHTBSptspp, DHAPT, FRUpts2pp, FRUptspp, GALTptspp, GAMptspp, GLCptspp, MALTptspp, MANGLYCptspp, MANptspp, MNLptspp, SBTptspp, SUCptspp, TREptspp
9758	-49.5361	EX_succ_e	10.8056	-10	0.0694611	4	30.0575	-13.0428	25.8624	-3.81046	8.00562	b2415, b2703, b3736, b1616	2DGLCptspp, ACGAptspp, ACMANAptspp, ACMUMptspp, ARBTptspp, ASCBptspp, ATPS4rpp, CELBpts, CHTBSptspp, DHAPT, FRUpts2pp, FRUptspp, GALTptspp, GAMptspp, GLCptspp, MALTptspp, MANGLYCptspp, MANptspp, METGLCURt2pp, MNLptspp, SBTptspp, SUCptspp, TREptspp
9759	-49.5361	EX_succ_e	10.8056	-10	0.0694611	4	30.0575	-13.0428	25.8624	-3.81046	8.00562	b2415, b4194, b3736, b4231	2DGLCptspp, ACGAptspp, ACMANAptspp, ACMUMptspp, ARBTptspp, ASCBptspp, ATPS4rpp, CELBpts, CHTBSptspp, DHAPT, FRUpts2pp, FRUptspp, GALTptspp, GAMptspp, GLCptspp, MALTptspp, MANGLYCptspp, MANptspp, MNLptspp, SBTptspp, SUCptspp, TREptspp
9760	-49.5361	EX_succ_e	10.8056	-10	0.0694611	4	30.0575	-13.0428	25.8624	-3.81046	8.00562	b2415, b3736, b0306, b1616	2DGLCptspp, ACGAptspp, ACMANAptspp, ACMUMptspp, ARBTptspp, ASCBptspp, ATPS4rpp, CELBpts, CHTBSptspp, DHAPT, FRUpts2pp, FRUptspp, GALTptspp, GAMptspp, GLCptspp, MALTptspp, MANGLYCptspp, MANptspp, METGLCURt2pp, MNLptspp, SBTptspp, SUCptspp, TREptspp
9761	-49.5361	EX_succ_e	10.8056	-10	0.0694611	4	30.0575	-13.0428	25.8624	-3.81046	8.00562	b0732, b2415, b3738, b1621	2DGLCptspp, ACGAptspp, ACMANAptspp, ACMUMptspp, ARBTptspp, ASCBptspp, ATPS4rpp, CELBpts, CHTBSptspp, DHAPT, FRUpts2pp, FRUptspp, GALTptspp, GAMptspp, GLCptspp, MALTptspp, MANGLYCptspp, MANPGH, MANptspp, MNLptspp, SBTptspp, SUCptspp, TREptspp
9762	-49.5361	EX_succ_e	10.8056	-10	0.0694611	4	30.0575	-13.0428	25.8624	-3.81046	8.00562	b2415, b2424, b2177, b3738	2DGLCptspp, ACGAptspp, ACMANAptspp, ACMUMptspp, ARBTptspp, ASCBptspp, ATPS4rpp, CELBpts, CHTBSptspp, DHAPT, FRUpts2pp, FRUptspp, GALTptspp, GAMptspp, GLCptspp, MALTptspp, MANGLYCptspp, MANptspp, MNLptspp, SBTptspp, SELabcpp, SLNTabcpp, SUCptspp, TREptspp, TSULabcpp
9763	-49.5361	EX_succ_e	10.8056	-10	0.0694611	4	30.0575	-13.0428	25.8624	-3.81046	8.00562	b2415, b3567, b3736, b1330	2DGLCptspp, ACGAptspp, ACMANAptspp, ACMUMptspp, ARBTptspp, ASCBptspp, ATPS4rpp, CELBpts, CHTBSptspp, DHAPT, FRUpts2pp, FRUptspp, GALTptspp, GAMptspp, GLCptspp, MALTptspp, MANGLYCptspp, MANptspp, MNLptspp, SBTptspp, SUCptspp, TREptspp, XYLabcpp
9764	-49.5361	EX_succ_e	10.8056	-10	0.0694611	4	30.0575	-13.0428	25.8624	-3.81046	8.00562	b2415, b3738, b2255, b2094	2DGLCptspp, ACGAptspp, ACMANAptspp, ACMUMptspp, ARBTptspp, ASCBptspp, ATPS4rpp, CELBpts, CHTBSptspp, DHAPT, FRUpts2pp, FRUptspp, GALTptspp, GAMptspp, GLCptspp, MALTptspp, MANGLYCptspp, MANptspp, MNLptspp, SBTptspp, SUCptspp, TREptspp, UDPGDC, ULA4NFT
9765	-49.5361	EX_succ_e	10.8056	-10	0.0694611	4	30.0575	-13.0428	25.8624	-3.81046	8.00562	b3925, b2415, b3732, b0925	2DGLCptspp, ACGAptspp, ACMANAptspp, ACMUMptspp, ARBTptspp, ASCBptspp, ATPS4rpp, CELBpts, CHTBSptspp, DHAPT, FRUpts2pp, FRUptspp, GALTptspp, GAMptspp, GLCptspp, MALTptspp, MANGLYCptspp, MANptspp, MNLptspp, SBTptspp, SUCptspp, TREptspp
9766	-49.5361	EX_succ_e	10.8056	-10	0.0694611	4	30.0575	-13.0428	25.8624	-3.81046	8.00562	b0077, b2415, b3738, b2169	2DGLCptspp, ACGAptspp, ACMANAptspp, ACMUMptspp, ARBTptspp, ASCBptspp, ATPS4rpp, CELBpts, CHTBSptspp, DHAPT, FRUpts2pp, FRUptspp, GALTptspp, GAMptspp, GLCptspp, MALTptspp, MANGLYCptspp, MANptspp, MNLptspp, SBTptspp, SUCptspp, TREptspp
9767	-49.5361	EX_succ_e	10.8056	-10	0.0694611	4	30.0575	-13.0428	25.8624	-3.81046	8.00562	b0073, b2415, b1224, b3732	2DGLCptspp, ACGAptspp, ACMANAptspp, ACMUMptspp, ARBTptspp, ASCBptspp, ATPS4rpp, CELBpts, CHTBSptspp, DHAPT, FRUpts2pp, FRUptspp, GALTptspp, GAMptspp, GLCptspp, MALTptspp, MANGLYCptspp, MANptspp, MNLptspp, SBTptspp, SUCptspp, TREptspp
9768	-49.5361	EX_succ_e	10.8056	-10	0.0694611	4	30.0575	-13.0428	25.8624	-3.81046	8.00562	b4054, b2415, b0365, b3736	2DGLCptspp, ACGAptspp, ACMANAptspp, ACMUMptspp, ARBTptspp, ASCBptspp, ATPS4rpp, CELBpts, CHTBSptspp, DHAPT, FRUpts2pp, FRUptspp, GALTptspp, GAMptspp, GLCptspp, MALTptspp, MANGLYCptspp, MANptspp, MNLptspp, SBTptspp, SUCptspp, TAURabcpp, TREptspp
9769	-49.5361	EX_succ_e	10.8056	-10	0.0694611	4	30.0575	-13.0428	25.8624	-3.81046	8.00562	b2415, b3577, b3679, b3732	23DOGULNt4pp, 2DGLCptspp, ACGAptspp, ACMANAptspp, ACMUMptspp, ARBTptspp, ASCBptspp, ATPS4rpp, CELBpts, CHTBSptspp, DHAPT, FRUpts2pp, FRUptspp, GALTptspp, GAMptspp, GLCptspp, INOSTt4pp, MALTptspp, MANGLYCptspp, MANptspp, MNLptspp, SBTptspp, SUCptspp, TREptspp, XYLUt2pp
9770	-49.5361	EX_succ_e	10.8056	-10	0.0694611	4	30.0575	-13.0428	25.8624	-3.81046	8.00562	b2415, b3610, b3732, b2843	2DGLCptspp, ACGAptspp, ACMANAptspp, ACMUMptspp, ARBTptspp, ASCBptspp, ATPS4rpp, CELBpts, CHTBSptspp, DHAPT, FRUpts2pp, FRUptspp, GALTptspp, GAMptspp, GLCptspp, KDUI, MALTptspp, MANGLYCptspp, MANptspp, MNLptspp, SBTptspp, SUCptspp, TREptspp
9771	-49.5361	EX_succ_e	10.8056	-10	0.0694611	4	30.0575	-13.0428	25.8624	-3.81046	8.00562	b2415, b3732, b3772, b4268	2DGLCptspp, ACGAptspp, ACMANAptspp, ACMUMptspp, ARBTptspp, ASCBptspp, ATPS4rpp, CELBpts, CHTBSptspp, DHAPT, FRUpts2pp, FRUptspp, GALTptspp, GAMptspp, GLCptspp, MALTptspp, MANGLYCptspp, MANptspp, MNLptspp, SBTptspp, SUCptspp, TREptspp
9772	-49.5361	EX_succ_e	10.8056	-10	0.0694611	4	30.0575	-13.0428	25.8624	-3.81046	8.00562	b2415, b3736, b3458, b0315	2DGLCptspp, ACGAptspp, ACMANAptspp, ACMUMptspp, ARBTptspp, ASCBptspp, ATPS4rpp, CELBpts, CHTBSptspp, DHAPT, FRUpts2pp, FRUptspp, GALTptspp, GAMptspp, GLCptspp, MALTptspp, MANGLYCptspp, MANptspp, MNLptspp, SBTptspp, SUCptspp, TREptspp
9773	-49.5361	EX_succ_e	10.8056	-10	0.0694611	4	30.0575	-13.0428	25.8624	-3.81046	8.00562	b2415, b3738, b4035, b2794	14GLUCANabcpp, 2DGLCptspp, ACGAptspp, ACMANAptspp, ACMUMptspp, ARBTptspp, ASCBptspp, ATPS4rpp, CDGR, CELBpts, CHTBSptspp, DHAPT, FRUpts2pp, FRUptspp, GALTptspp, GAMptspp, GLCptspp, MALTHXabcpp, MALTPTabcpp, MALTTRabcpp, MALTTTRabcpp, MALTabcpp, MALTptspp, MANGLYCptspp, MANptspp, MNLptspp, SBTptspp, SUCptspp, TREptspp
9774	-49.5361	EX_succ_e	10.8056	-10	0.0694611	4	30.0575	-13.0428	25.8624	-3.81046	8.00562	b2415, b2424, b3732, b1008	2DGLCptspp, ACGAptspp, ACMANAptspp, ACMUMptspp, ARBTptspp, ASCBptspp, ATPS4rpp, CELBpts, CHTBSptspp, DHAPT, FRUpts2pp, FRUptspp, GALTptspp, GAMptspp, GLCptspp, MALTptspp, MANGLYCptspp, MANptspp, MNLptspp, SBTptspp, SELabcpp, SLNTabcpp, SUCptspp, TREptspp, TSULabcpp
9775	-49.5361	EX_succ_e	10.8056	-10	0.0694611	4	30.0575	-13.0428	25.8624	-3.81046	8.00562	b2415, b0764, b3732, b4035	14GLUCANabcpp, 2DGLCptspp, ACGAptspp, ACMANAptspp, ACMUMptspp, ARBTptspp, ASCBptspp, ATPS4rpp, CELBpts, CHTBSptspp, DHAPT, FRUpts2pp, FRUptspp, GALTptspp, GAMptspp, GLCptspp, MALTHXabcpp, MALTPTabcpp, MALTTRabcpp, MALTTTRabcpp, MALTabcpp, MALTptspp, MANGLYCptspp, MANptspp, MNLptspp, SBTptspp, SUCptspp, TREptspp, TUNGSabcpp
9776	-49.5361	EX_succ_e	10.8056	-10	0.0694611	4	30.0575	-13.0428	25.8624	-3.81046	8.00562	b2415, b3583, b3736, b3751	2DGLCptspp, ACGAptspp, ACMANAptspp, ACMUMptspp, ARBTptspp, ASCBptspp, ATPS4rpp, CELBpts, CHTBSptspp, DHAPT, FRUpts2pp, FRUptspp, GALTptspp, GAMptspp, GLCptspp, MALTptspp, MANGLYCptspp, MANptspp, MNLptspp, SBTptspp, SUCptspp, TREptspp
9777	-49.5361	EX_succ_e	10.8056	-10	0.0694611	4	30.0575	-13.0428	25.8624	-3.81046	8.00562	b2039, b2415, b3738, b4098	2DGLCptspp, ACGAptspp, ACMANAptspp, ACMUMptspp, ARBTptspp, ASCBptspp, ATPS4rpp, CELBpts, CHTBSptspp, CPL, DHAPT, FRUpts2pp, FRUptspp, GALTptspp, GAMptspp, GLCptspp, MALTptspp, MANGLYCptspp, MANptspp, MNLptspp, SBTptspp, SUCptspp, TREptspp
9778	-49.5361	EX_succ_e	10.8056	-10	0.0694611	4	30.0575	-13.0428	25.8624	-3.81046	8.00562	b0895, b4146, b2415, b3736	2DGLCptspp, ACGAptspp, ACMANAptspp, ACMUMptspp, ARBTptspp, ASCBptspp, ATPS4rpp, CELBpts, CHTBSptspp, DHAPT, DMSOR2, FRUpts2pp, FRUptspp, GALTptspp, GAMptspp, GLCptspp, LYSAM, MALTptspp, MANGLYCptspp, MANptspp, MNLptspp, SBTptspp, SUCptspp, TMAOR2, TREptspp
9779	-49.5361	EX_succ_e	10.8056	-10	0.0694611	4	30.0575	-13.0428	25.8624	-3.81046	8.00562	b2415, b2727, b2177, b3738	2DGLCptspp, ACGAptspp, ACMANAptspp, ACMUMptspp, ARBTptspp, ASCBptspp, ATPS4rpp, CELBpts, CHTBSptspp, DHAPT, FRUpts2pp, FRUptspp, GALTptspp, GAMptspp, GLCptspp, MALTptspp, MANGLYCptspp, MANptspp, MNLptspp, SBTptspp, SUCptspp, TREptspp
9780	-49.5361	EX_succ_e	10.8056	-10	0.0694611	4	30.0575	-13.0428	25.8624	-3.81046	8.00562	b3011, b2415, b3732, b4485	13PPDH2, 2DGLCptspp, ACGAptspp, ACMANAptspp, ACMUMptspp, ARBTptspp, ASCBptspp, ATPS4rpp, CELBpts, CHTBSptspp, DHAPT, FRUpts2pp, FRUptspp, GALTptspp, GAMptspp, GLCptspp, MALTptspp, MANGLYCptspp, MANptspp, MNLptspp, SBTptspp, SUCptspp, TREptspp
9781	-49.5361	EX_succ_e	10.8056	-10	0.0694611	4	30.0575	-13.0428	25.8624	-3.81046	8.00562	b2415, b3732, b2578, b1485	2DGLCptspp, ACGAptspp, ACMANAptspp, ACMUMptspp, ARBTptspp, ASCBptspp, ATPS4rpp, CELBpts, CHTBSptspp, DHAPT, FRUpts2pp, FRUptspp, GALTptspp, GAMptspp, GLCptspp, MALTptspp, MANGLYCptspp, MANptspp, MNLptspp, SBTptspp, SUCptspp, TREptspp
9782	-49.5361	EX_succ_e	10.8056	-10	0.0694611	4	30.0575	-13.0428	25.8624	-3.81046	8.00562	b2415, b2490, b3736, b3735	2DGLCptspp, ACGAptspp, ACMANAptspp, ACMUMptspp, ARBTptspp, ASCBptspp, ATPS4rpp, CELBpts, CHTBSptspp, DHAPT, FRUpts2pp, FRUptspp, GALTptspp, GAMptspp, GLCptspp, MALTptspp, MANGLYCptspp, MANptspp, MNLptspp, SBTptspp, SUCptspp, TREptspp
9783	-49.5361	EX_succ_e	10.8056	-10	0.0694611	4	30.0575	-13.0428	25.8624	-3.81046	8.00562	b2415, b1244, b3738, b3605	2DGLCptspp, ACGAptspp, ACMANAptspp, ACMUMptspp, ARBTptspp, ASCBptspp, ATPS4rpp, CELBpts, CHTBSptspp, DHAPT, FRUpts2pp, FRUptspp, GALTptspp, GAMptspp, GLCptspp, MALTptspp, MANGLYCptspp, MANptspp, MNLptspp, SBTptspp, SUCptspp, TREptspp
9784	-49.5361	EX_succ_e	10.8056	-10	0.0694611	4	30.0575	-13.0428	25.8624	-3.81046	8.00562	b2415, b1270, b3736, b0070	2DGLCptspp, ACGAptspp, ACMANAptspp, ACMUMptspp, ARBTptspp, ASCBptspp, ATPS4rpp, CBIAT, CBLAT, CELBpts, CHTBSptspp, DHAPT, FRUpts2pp, FRUptspp, GALTptspp, GAMptspp, GLCptspp, MALTptspp, MANGLYCptspp, MANptspp, MNLptspp, SBTptspp, SUCptspp, TREptspp
9785	-49.5361	EX_succ_e	10.8056	-10	0.0694611	4	30.0575	-13.0428	25.8624	-3.81046	8.00562	b3781, b2415, b2435, b3732	2DGLCptspp, ACGAptspp, ACMANAptspp, ACMUMptspp, ARBTptspp, ASCBptspp, ATPS4rpp, CELBpts, CHTBSptspp, DHAPT, FRUpts2pp, FRUptspp, GALTptspp, GAMptspp, GLCptspp, MALTptspp, MANGLYCptspp, MANptspp, MNLptspp, SBTptspp, SUCptspp, TREptspp
9786	-49.5361	EX_succ_e	10.8056	-10	0.0694611	4	30.0575	-13.0428	25.8624	-3.81046	8.00562	b1692, b2415, b1224, b3738	2DGLCptspp, ACGAptspp, ACMANAptspp, ACMUMptspp, ARBTptspp, ASCBptspp, ATPS4rpp, CELBpts, CHTBSptspp, DHAPT, FRUpts2pp, FRUptspp, GALTptspp, GAMptspp, GLCptspp, MALTptspp, MANGLYCptspp, MANptspp, MNLptspp, QUINDH, QUINDHyi, SBTptspp, SUCptspp, TREptspp
9787	-49.5361	EX_succ_e	10.8056	-10	0.0694611	4	30.0575	-13.0428	25.8624	-3.81046	8.00562	b2521, b2415, b3732, b4311	2DGLCptspp, ACGAptspp, ACMANAptspp, ACMUMptspp, ARBTptspp, ASCBptspp, ATPS4rpp, CELBpts, CHTBSptspp, DHAPT, FRUpts2pp, FRUptspp, GALTptspp, GAMptspp, GLCptspp, MALTptspp, MANGLYCptspp, MANptspp, MCPST, MNLptspp, SBTptspp, SUCptspp, TREptspp
9788	-49.5361	EX_succ_e	10.8056	-10	0.0694611	4	30.0575	-13.0428	25.8624	-3.81046	8.00562	b2415, b2206, b3732, b2963	2DGLCptspp, ACGAptspp, ACMANAptspp, ACMUMptspp, ARBTptspp, ASCBptspp, ATPS4rpp, CELBpts, CHTBSptspp, DHAPT, FRUpts2pp, FRUptspp, GALTptspp, GAMptspp, GLCptspp, MALTptspp, MANGLYCptspp, MANptspp, MNLptspp, NO3R1bpp, NO3R2bpp, SBTptspp, SUCptspp, TREptspp
9789	-49.5361	EX_succ_e	10.8056	-10	0.0694611	4	30.0575	-13.0428	25.8624	-3.81046	8.00562	b2415, b3736, b0306, b0809	2DGLCptspp, ACGAptspp, ACMANAptspp, ACMUMptspp, ARBTptspp, ASCBptspp, ATPS4rpp, CELBpts, CHTBSptspp, DHAPT, FRUpts2pp, FRUptspp, GALTptspp, GAMptspp, GLCptspp, GLNabcpp, MALTptspp, MANGLYCptspp, MANptspp, MNLptspp, SBTptspp, SUCptspp, TREptspp
9790	-49.5361	EX_succ_e	10.8056	-10	0.0694611	4	30.0575	-13.0428	25.8624	-3.81046	8.00562	b2415, b3738, b2094, b1733	2DGLCptspp, ACGAptspp, ACMANAptspp, ACMUMptspp, ARBTptspp, ASCBptspp, ATPS4rpp, CELBpts, CHTBSptspp, DC6PDA, DHAPT, FRUpts2pp, FRUptspp, GALTptspp, GAMptspp, GLCptspp, MALTptspp, MANGLYCptspp, MANptspp, MNLptspp, SBTptspp, SUCptspp, TREptspp
9791	-49.5361	EX_succ_e	10.8056	-10	0.0694611	4	30.0575	-13.0428	25.8624	-3.81046	8.00562	b2415, b3062, b3732, b1185	2DGLCptspp, ACGAptspp, ACMANAptspp, ACMUMptspp, ARBTptspp, ASCBptspp, ATPS4rpp, CELBpts, CHTBSptspp, DHAPT, DSBAO1, DSBAO2, FRUpts2pp, FRUptspp, GALTptspp, GAMptspp, GLCptspp, MALTptspp, MANGLYCptspp, MANptspp, MNLptspp, SBTptspp, SUCptspp, TARTD, TREptspp
9792	-49.5361	EX_succ_e	10.8056	-10	0.0694611	4	30.0575	-13.0428	25.8624	-3.81046	8.00562	b2415, b4195, b3736, b0462	2DGLCptspp, ACGAptspp, ACMANAptspp, ACMUMptspp, ARBTptspp, ASCBptspp, ATPS4rpp, CELBpts, CHTBSptspp, DHAPT, FRUpts2pp, FRUptspp, GALTptspp, GAMptspp, GLCptspp, MALTptspp, MANGLYCptspp, MANptspp, MNLptspp, SBTptspp, SUCptspp, TREptspp
9793	-49.5361	EX_succ_e	10.8056	-10	0.0694611	4	30.0575	-13.0428	25.8624	-3.81046	8.00562	b2415, b2918, b3738, b2037	2DGLCptspp, ACGAptspp, ACMANAptspp, ACMUMptspp, ARBTptspp, ASCBptspp, ATPS4rpp, CELBpts, CHTBSptspp, DHAPT, FRUpts2pp, FRUptspp, GALTptspp, GAMptspp, GLCptspp, MALTptspp, MANGLYCptspp, MANptspp, MNLptspp, O16AUNDtpp, SBTptspp, SUCptspp, TREptspp
9794	-49.5361	EX_succ_e	10.8056	-10	0.0694611	4	30.0575	-13.0428	25.8624	-3.81046	8.00562	b1019, b2415, b3736, b0808	2DGLCptspp, ACGAptspp, ACMANAptspp, ACMUMptspp, ARBTptspp, ASCBptspp, ATPS4rpp, CELBpts, CHTBSptspp, DHAPT, FRUpts2pp, FRUptspp, GALTptspp, GAMptspp, GLCptspp, MALTptspp, MANGLYCptspp, MANptspp, MNLptspp, SBTptspp, SUCptspp, TREptspp
9795	-49.5361	EX_succ_e	10.8056	-10	0.0694611	4	30.0575	-13.0428	25.8624	-3.81046	8.00562	b2415, b0347, b3736, b4088	2DGLCptspp, 3HCINNMH, 3HPPPNH, ACGAptspp, ACMANAptspp, ACMUMptspp, ALLabcpp, ARBTptspp, ASCBptspp, ATPS4rpp, CELBpts, CHTBSptspp, DHAPT, FRUpts2pp, FRUptspp, GALTptspp, GAMptspp, GLCptspp, MALTptspp, MANGLYCptspp, MANptspp, MNLptspp, SBTptspp, SUCptspp, TREptspp
9796	-49.5361	EX_succ_e	10.8056	-10	0.0694611	4	30.0575	-13.0428	25.8624	-3.81046	8.00562	b2415, b3736, b3664, b2253	2DGLCptspp, ACGAptspp, ACMANAptspp, ACMUMptspp, ARBTptspp, ASCBptspp, ATPS4rpp, CELBpts, CHTBSptspp, DHAPT, FRUpts2pp, FRUptspp, GALTptspp, GAMptspp, GLCptspp, MALTptspp, MANGLYCptspp, MANptspp, MNLptspp, SBTptspp, SUCptspp, TREptspp, UDPKAAT
9797	-49.5361	EX_succ_e	10.8056	-10	0.0694611	4	30.0575	-13.0428	25.8624	-3.81046	8.00562	b2415, b3736, b0576, b4106	2DGLCptspp, ACGAptspp, ACMANAptspp, ACMUMptspp, ARBTptspp, ASCBptspp, ATPS4rpp, CELBpts, CHTBSptspp, DHAPT, FRUpts2pp, FRUptspp, GALTptspp, GAMptspp, GLCptspp, MALTptspp, MANGLYCptspp, MANptspp, MEPNabcpp, MNLptspp, SBTptspp, SUCptspp, TREptspp
9798	-49.5361	EX_succ_e	10.8056	-10	0.0694611	4	30.0575	-13.0428	25.8624	-3.81046	8.00562	b2415, b1778, b3736, b3856	2DGLCptspp, ACGAptspp, ACMANAptspp, ACMUMptspp, ARBTptspp, ASCBptspp, ATPS4rpp, CELBpts, CHTBSptspp, DHAPT, FRUpts2pp, FRUptspp, GALTptspp, GAMptspp, GLCptspp, MALTptspp, MANGLYCptspp, MANptspp, MNLptspp, SBTptspp, SUCptspp, TREptspp
9799	-49.5361	EX_succ_e	10.8056	-10	0.0694611	4	30.0575	-13.0428	25.8624	-3.81046	8.00562	b2415, b3736, b0578, b3496	2DGLCptspp, ACGAptspp, ACMANAptspp, ACMUMptspp, ARBTptspp, ASCBptspp, ATPS4rpp, CELBpts, CHTBSptspp, DHAPT, DHPTDNR, DHPTDNRN, FRUpts2pp, FRUptspp, GALTptspp, GAMptspp, GLCptspp, MALTptspp, MANGLYCptspp, MANptspp, MNLptspp, SBTptspp, SUCptspp, TREptspp
9800	-49.5361	EX_succ_e	10.8056	-10	0.0694611	4	30.0575	-13.0428	25.8624	-3.81046	8.00562	b2415, b3732, b3824, b2873	2DGLCptspp, ACGAptspp, ACMANAptspp, ACMUMptspp, ARBTptspp, ASCBptspp, ATPS4rpp, CELBpts, CHTBSptspp, DHAPT, FRUpts2pp, FRUptspp, GALTptspp, GAMptspp, GLCptspp, MALTptspp, MANGLYCptspp, MANptspp, MNLptspp, PHDA, SBTptspp, SUCptspp, TREptspp
9801	-49.5361	EX_succ_e	10.8056	-10	0.0694611	4	30.0575	-13.0428	25.8624	-3.81046	8.00562	b2415, b2797, b3732, b1113	2DGLCptspp, ACGAptspp, ACMANAptspp, ACMUMptspp, ARBTptspp, ASCBptspp, ATPS4rpp, CELBpts, CHTBSptspp, DHAPT, FRUpts2pp, FRUptspp, GALTptspp, GAMptspp, GLCptspp, MALTptspp, MANGLYCptspp, MANptspp, MNLptspp, SBTptspp, SUCptspp, TREptspp
9802	-49.5361	EX_succ_e	10.8056	-10	0.0694611	4	30.0575	-13.0428	25.8624	-3.81046	8.00562	b2415, b1270, b3736, b2254	2DGLCptspp, ACGAptspp, ACMANAptspp, ACMUMptspp, ARBTptspp, ASCBptspp, ATPS4rpp, CBIAT, CBLAT, CELBpts, CHTBSptspp, DHAPT, FRUpts2pp, FRUptspp, GALTptspp, GAMptspp, GLCptspp, MALTptspp, MANGLYCptspp, MANptspp, MNLptspp, SBTptspp, SUCptspp, TREptspp, UPLA4FNT
9803	-49.5361	EX_succ_e	10.8056	-10	0.0694611	4	30.0575	-13.0428	25.8624	-3.81046	8.00562	b2415, b3736, b3735, b1123	2DGLCptspp, ACGAptspp, ACMANAptspp, ACMUMptspp, ARBTptspp, ASCBptspp, ATPS4rpp, CELBpts, CHTBSptspp, DHAPT, FRUpts2pp, FRUptspp, GALTptspp, GAMptspp, GLCptspp, MALTptspp, MANGLYCptspp, MANptspp, MNLptspp, SBTptspp, SUCptspp, TREptspp
9804	-49.5361	EX_succ_e	10.8056	-10	0.0694611	4	30.0575	-13.0428	25.8624	-3.81046	8.00562	b2415, b3736, b4087, b0650	2DGLCptspp, ACGAptspp, ACMANAptspp, ACMUMptspp, ALLabcpp, ARBTptspp, ASCBptspp, ATPS4rpp, CELBpts, CHTBSptspp, DHAPT, FRUpts2pp, FRUptspp, GALTptspp, GAMptspp, GLCptspp, MALTptspp, MANGLYCptspp, MANptspp, MNLptspp, SBTptspp, SUCptspp, TREptspp
9805	-49.5361	EX_succ_e	10.8056	-10	0.0694611	4	30.0575	-13.0428	25.8624	-3.81046	8.00562	b2415, b1224, b3736, b1193	2DGLCptspp, ACGAptspp, ACMANAptspp, ACMUMptspp, ARBTptspp, ASCBptspp, ATPS4rpp, CELBpts, CHTBSptspp, DHAPT, FRUpts2pp, FRUptspp, GALTptspp, GAMptspp, GLCptspp, MALTptspp, MANGLYCptspp, MANptspp, MNLptspp, SBTptspp, SUCptspp, TREptspp
9806	-49.5361	EX_succ_e	10.8056	-10	0.0694611	4	30.0575	-13.0428	25.8624	-3.81046	8.00562	b2415, b3732, b4032, b2796	14GLUCANabcpp, 2DGLCptspp, ACGAptspp, ACMANAptspp, ACMUMptspp, ARBTptspp, ASCBptspp, ATPS4rpp, CELBpts, CHTBSptspp, DHAPT, FRUpts2pp, FRUptspp, GALTptspp, GAMptspp, GLCptspp, MALTHXabcpp, MALTPTabcpp, MALTTRabcpp, MALTTTRabcpp, MALTabcpp, MALTptspp, MANGLYCptspp, MANptspp, MNLptspp, SBTptspp, SUCptspp, TREptspp
9807	-49.5361	EX_succ_e	10.8056	-10	0.0694611	4	30.0575	-13.0428	25.8624	-3.81046	8.00562	b2415, b2817, b3732, b0465	2DGLCptspp, ACGAptspp, ACMANAptspp, ACMUMptspp, ARBTptspp, ASCBptspp, ATPS4rpp, CELBpts, CHTBSptspp, DHAPT, FRUpts2pp, FRUptspp, GALTptspp, GAMptspp, GLCptspp, MALTptspp, MANGLYCptspp, MANptspp, MNLptspp, SBTptspp, SUCptspp, TREptspp
9808	-49.5361	EX_succ_e	10.8056	-10	0.0694611	4	30.0575	-13.0428	25.8624	-3.81046	8.00562	b0077, b0905, b2415, b3732	2DGLCptspp, ACGAptspp, ACMANAptspp, ACMUMptspp, ARBTptspp, ASCBptspp, ATPS4rpp, CELBpts, CHTBSptspp, DHAPT, FRUpts2pp, FRUptspp, GALTptspp, GAMptspp, GLCptspp, MALTptspp, MANGLYCptspp, MANptspp, MNLptspp, SBTptspp, SUCptspp, TREptspp
9809	-49.5361	EX_succ_e	10.8056	-10	0.0694611	4	30.0575	-13.0428	25.8624	-3.81046	8.00562	b3581, b2415, b3736, b2253	2DGLCptspp, ACGAptspp, ACMANAptspp, ACMUMptspp, ARBTptspp, ASCBptspp, ATPS4rpp, CELBpts, CHTBSptspp, DHAPT, FRUpts2pp, FRUptspp, GALTptspp, GAMptspp, GLCptspp, MALTptspp, MANGLYCptspp, MANptspp, MNLptspp, SBTptspp, SUCptspp, TREptspp, UDPKAAT
9810	-49.5361	EX_succ_e	10.8056	-10	0.0694611	4	30.0575	-13.0428	25.8624	-3.81046	8.00562	b3011, b2415, b3732, b2047	13PPDH2, 2DGLCptspp, ACGAptspp, ACMANAptspp, ACMUMptspp, ARBTptspp, ASCBptspp, ATPS4rpp, CELBpts, CHTBSptspp, DHAPT, FRUpts2pp, FRUptspp, GALTptspp, GAMptspp, GLCptspp, MALTptspp, MANGLYCptspp, MANptspp, MNLptspp, SBTptspp, SUCptspp, TREptspp, UDPGPT
9811	-49.5361	EX_succ_e	10.8056	-10	0.0694611	4	30.0575	-13.0428	25.8624	-3.81046	8.00562	b2415, b3736, b3734, b3893	2DGLCptspp, ACGAptspp, ACMANAptspp, ACMUMptspp, ARBTptspp, ASCBptspp, ATPS4rpp, CELBpts, CHTBSptspp, DHAPT, FRUpts2pp, FRUptspp, GALTptspp, GAMptspp, GLCptspp, MALTptspp, MANGLYCptspp, MANptspp, MNLptspp, SBTptspp, SUCptspp, TREptspp
9812	-49.5361	EX_succ_e	10.8056	-10	0.0694611	4	30.0575	-13.0428	25.8624	-3.81046	8.00562	b2415, b2425, b3736, b0839	2DGLCptspp, ACGAptspp, ACMANAptspp, ACMUMptspp, ARBTptspp, ASCBptspp, ATPS4rpp, CELBpts, CHTBSptspp, DHAPT, FRUpts2pp, FRUptspp, GALTptspp, GAMptspp, GLCptspp, MALTptspp, MANGLYCptspp, MANptspp, MNLptspp, SBTptspp, SUCptspp, TREptspp
9813	-49.5361	EX_succ_e	10.8056	-10	0.0694611	4	30.0575	-13.0428	25.8624	-3.81046	8.00562	b2341, b2415, b3738, b0875	2DGLCptspp, ACGAptspp, ACMANAptspp, ACMUMptspp, ARBTptspp, ASCBptspp, ATPS4rpp, CELBpts, CHTBSptspp, DHAPT, FRUpts2pp, FRUptspp, GALTptspp, GAMptspp, GLCptspp, MALTptspp, MANGLYCptspp, MANptspp, MNLptspp, SBTptspp, SUCptspp, TREptspp
9814	-49.5361	EX_succ_e	10.8056	-10	0.0694611	4	30.0575	-13.0428	25.8624	-3.81046	8.00562	b3781, b2415, b3826, b3738	2DGLCptspp, ACGAptspp, ACMANAptspp, ACMUMptspp, ARBTptspp, ASCBptspp, ATPS4rpp, CELBpts, CHTBSptspp, DHAPT, FRUpts2pp, FRUptspp, GALTptspp, GAMptspp, GLCptspp, MALTptspp, MANGLYCptspp, MANptspp, MNLptspp, SBTptspp, SUCptspp, TREptspp
9815	-49.5361	EX_succ_e	10.8056	-10	0.0694611	4	30.0575	-13.0428	25.8624	-3.81046	8.00562	b2415, b0752, b3736, b3458	2DGLCptspp, ACGAptspp, ACMANAptspp, ACMUMptspp, ARBTptspp, ASCBptspp, ATPS4rpp, CELBpts, CHTBSptspp, DHAPT, FRUpts2pp, FRUptspp, GALTptspp, GAMptspp, GLCptspp, MALTptspp, MANGLYCptspp, MANptspp, MNLptspp, SBTptspp, SUCptspp, TREptspp
9816	-49.5361	EX_succ_e	10.8056	-10	0.0694611	4	30.0575	-13.0428	25.8624	-3.81046	8.00562	b1200, b2415, b3732, b4231	2DGLCptspp, ACGAptspp, ACMANAptspp, ACMUMptspp, ARBTptspp, ASCBptspp, ATPS4rpp, CELBpts, CHTBSptspp, DHAPT, FRUpts2pp, FRUptspp, GALTptspp, GAMptspp, GLCptspp, MALTptspp, MANGLYCptspp, MANptspp, MNLptspp, SBTptspp, SUCptspp, TREptspp
9817	-49.5361	EX_succ_e	10.8056	-10	0.0694611	4	30.0575	-13.0428	25.8624	-3.81046	8.00562	b2415, b3732, b3824, b1476	2DGLCptspp, ACGAptspp, ACMANAptspp, ACMUMptspp, ARBTptspp, ASCBptspp, ATPS4rpp, CELBpts, CHTBSptspp, DHAPT, FRUpts2pp, FRUptspp, GALTptspp, GAMptspp, GLCptspp, MALTptspp, MANGLYCptspp, MANptspp, MNLptspp, SBTptspp, SUCptspp, TREptspp
9818	-49.5361	EX_succ_e	10.8056	-10	0.0694611	4	30.0575	-13.0428	25.8624	-3.81046	8.00562	b2415, b3061, b0573, b3732	2DGLCptspp, ACGAptspp, ACMANAptspp, ACMUMptspp, AGt3, ARBTptspp, ASCBptspp, ATPS4rpp, CELBpts, CHTBSptspp, CUt3, DHAPT, FRUpts2pp, FRUptspp, GALTptspp, GAMptspp, GLCptspp, MALTptspp, MANGLYCptspp, MANptspp, MNLptspp, SBTptspp, SUCptspp, TARTD, TREptspp
9819	-49.5361	EX_succ_e	10.8056	-10	0.0694611	4	30.0575	-13.0428	25.8624	-3.81046	8.00562	b2415, b3061, b3738, b2877	2DGLCptspp, ACGAptspp, ACMANAptspp, ACMUMptspp, ARBTptspp, ASCBptspp, ATPS4rpp, CELBpts, CHTBSptspp, DHAPT, FRUpts2pp, FRUptspp, GALTptspp, GAMptspp, GLCptspp, MALTptspp, MANGLYCptspp, MANptspp, MNLptspp, MOCDS, SBTptspp, SUCptspp, TARTD, TREptspp
9820	-49.5361	EX_succ_e	10.8056	-10	0.0694611	4	30.0575	-13.0428	25.8624	-3.81046	8.00562	b0340, b2053, b2415, b3732	2DGLCptspp, ACGAptspp, ACMANAptspp, ACMUMptspp, ARBTptspp, ASCBptspp, ATPS4rpp, CELBpts, CHTBSptspp, CYNTAH, DHAPT, FRUpts2pp, FRUptspp, GALTptspp, GAMptspp, GLCptspp, GMAND, MALTptspp, MANGLYCptspp, MANptspp, MNLptspp, SBTptspp, SUCptspp, TREptspp
9821	-49.5361	EX_succ_e	10.8056	-10	0.0694611	4	30.0575	-13.0428	25.8624	-3.81046	8.00562	b0351, b2415, b3736, b2037	2DGLCptspp, ACGAptspp, ACMANAptspp, ACMUMptspp, ARBTptspp, ASCBptspp, ATPS4rpp, CELBpts, CHTBSptspp, DHAPT, FRUpts2pp, FRUptspp, GALTptspp, GAMptspp, GLCptspp, MALTptspp, MANGLYCptspp, MANptspp, MNLptspp, O16AUNDtpp, SBTptspp, SUCptspp, TREptspp
9822	-49.5361	EX_succ_e	10.8056	-10	0.0694611	4	30.0575	-13.0428	25.8624	-3.81046	8.00562	b2415, b0241, b3732, b1798	2DGLCptspp, ACGAptspp, ACMANAptspp, ACMUMptspp, ARBTptspp, ASCBptspp, ATPS4rpp, CELBpts, CHTBSptspp, DHAPT, FRUpts2pp, FRUptspp, GALTptspp, GAMptspp, GLCptspp, MALTptspp, MANGLYCptspp, MANptspp, MNLptspp, SBTptspp, SUCptspp, TREptspp
9823	-49.5361	EX_succ_e	10.8056	-10	0.0694611	4	30.0575	-13.0428	25.8624	-3.81046	8.00562	b2415, b3736, b0353, b1535	2DGLCptspp, ACGAptspp, ACMANAptspp, ACMUMptspp, ARBTptspp, ASCBptspp, ATPS4rpp, CELBpts, CHTBSptspp, DHAPT, FRUpts2pp, FRUptspp, GALTptspp, GAMptspp, GLCptspp, HCINNMt2rpp, HPPPNt2rpp, MALTptspp, MANGLYCptspp, MANptspp, MNLptspp, SBTptspp, SUCptspp, TREptspp
9824	-49.5361	EX_succ_e	10.8056	-10	0.0694611	4	30.0575	-13.0428	25.8624	-3.81046	8.00562	b0348, b2415, b0957, b3738	2DGLCptspp, ACGAptspp, ACMANAptspp, ACMUMptspp, ARBTptspp, ASCBptspp, ATPS4rpp, CELBpts, CHTBSptspp, DHAPT, DHCINDO, FRUpts2pp, FRUptspp, GALTptspp, GAMptspp, GLCptspp, HPPPNDO, MALTptspp, MANGLYCptspp, MANptspp, MNLptspp, SBTptspp, SUCptspp, TREptspp
9825	-49.5361	EX_succ_e	10.8056	-10	0.0694611	4	30.0575	-13.0428	25.8624	-3.81046	8.00562	b3582, b2415, b1761, b3732	2DGLCptspp, ACGAptspp, ACMANAptspp, ACMUMptspp, ARBTptspp, ASCBptspp, ATPS4rpp, CELBpts, CHTBSptspp, DHAPT, FRUpts2pp, FRUptspp, GALTptspp, GAMptspp, GLCptspp, MALTptspp, MANGLYCptspp, MANptspp, MNLptspp, SBTptspp, SUCptspp, TREptspp
9826	-49.5361	EX_succ_e	10.8056	-10	0.0694611	4	30.0575	-13.0428	25.8624	-3.81046	8.00562	b2415, b0752, b3732, b0484	2DGLCptspp, ACGAptspp, ACMANAptspp, ACMUMptspp, ARBTptspp, ASCBptspp, ATPS4rpp, CELBpts, CHTBSptspp, CU1abcpp, DHAPT, FRUpts2pp, FRUptspp, GALTptspp, GAMptspp, GLCptspp, MALTptspp, MANGLYCptspp, MANptspp, MNLptspp, SBTptspp, SUCptspp, TREptspp
9827	-49.5361	EX_succ_e	10.8056	-10	0.0694611	4	30.0575	-13.0428	25.8624	-3.81046	8.00562	b1732, b2415, b3732, b0650	2DGLCptspp, ACGAptspp, ACMANAptspp, ACMUMptspp, ARBTptspp, ASCBptspp, ATPS4rpp, CELBpts, CHTBSptspp, DHAPT, FRUpts2pp, FRUptspp, GALTptspp, GAMptspp, GLCptspp, MALTptspp, MANGLYCptspp, MANptspp, MNLptspp, SBTptspp, SUCptspp, TREptspp
9828	-49.5361	EX_succ_e	10.8056	-10	0.0694611	4	30.0575	-13.0428	25.8624	-3.81046	8.00562	b3789, b2415, b1622, b3738	2DGLCptspp, ACGAptspp, ACMANAptspp, ACMUMptspp, ARBTptspp, ASCBptspp, ATPS4rpp, CELBpts, CHTBSptspp, DHAPT, FRUpts2pp, FRUptspp, GALTptspp, GAMptspp, GLCptspp, MALTptspp, MANGLYCptspp, MANptspp, MNLptspp, SBTptspp, SUCptspp, TREptspp
9829	-49.5361	EX_succ_e	10.8056	-10	0.0694611	4	30.0575	-13.0428	25.8624	-3.81046	8.00562	b1241, b2415, b3849, b3736	2DGLCptspp, ACGAptspp, ACMANAptspp, ACMUMptspp, ARBTptspp, ASCBptspp, ATPS4rpp, CELBpts, CHTBSptspp, DHAPT, FRUpts2pp, FRUptspp, GALTptspp, GAMptspp, GLCptspp, MALTptspp, MANGLYCptspp, MANptspp, MNLptspp, SBTptspp, SUCptspp, TREptspp
9830	-49.5361	EX_succ_e	10.8056	-10	0.0694611	4	30.0575	-13.0428	25.8624	-3.81046	8.00562	b2415, b4173, b3732, b0269	2DGLCptspp, ACGAptspp, ACMANAptspp, ACMUMptspp, ARBTptspp, ASCBptspp, ATPS4rpp, CELBpts, CHTBSptspp, DHAPT, FRUpts2pp, FRUptspp, GALTptspp, GAMptspp, GLCptspp, MALTptspp, MANGLYCptspp, MANptspp, MNLptspp, SBTptspp, SUCptspp, TREptspp
9831	-49.5361	EX_succ_e	10.8056	-10	0.0694611	4	30.0575	-13.0428	25.8624	-3.81046	8.00562	b2415, b3738, b2344, b1661	2DGLCptspp, ACGAptspp, ACMANAptspp, ACMUMptspp, ARBTptspp, ASCBptspp, ATPS4rpp, CELBpts, CFAS160E, CFAS160G, CFAS180E, CFAS180G, CHTBSptspp, DDCAtexi, DHAPT, FRUpts2pp, FRUptspp, GALTptspp, GAMptspp, GLCptspp, HDCAtexi, HDCEAtexi, MALTptspp, MANGLYCptspp, MANptspp, MNLptspp, OCDCAtexi, OCDCEAtexi, SBTptspp, SUCptspp, TREptspp, TTDCAtexi, TTDCEAtexi
9832	-49.5361	EX_succ_e	10.8056	-10	0.0694611	4	30.0575	-13.0428	25.8624	-3.81046	8.00562	b2415, b3732, b4230, b4093	2DGLCptspp, ACGAptspp, ACMANAptspp, ACMUMptspp, AMPNTAT, ARBTptspp, ASCBptspp, ATPS4rpp, CELBpts, CHTBSptspp, DHAPT, FRUpts2pp, FRUptspp, GALTptspp, GAMptspp, GLCptspp, MALTptspp, MANGLYCptspp, MANptspp, MNLptspp, SBTptspp, SUCptspp, TREptspp
9833	-49.5361	EX_succ_e	10.8056	-10	0.0694611	4	30.0575	-13.0428	25.8624	-3.81046	8.00562	b3222, b4024, b2415, b3735	2DGLCptspp, ACGAptspp, ACMANAptspp, ACMUMptspp, AMANK, ARBTptspp, ASCBptspp, ATPS4rpp, CELBpts, CHTBSptspp, DHAPT, FRUpts2pp, FRUptspp, GALTptspp, GAMptspp, GLCptspp, MALTptspp, MANGLYCptspp, MANptspp, MNLptspp, SBTptspp, SUCptspp, TREptspp
9834	-49.5361	EX_succ_e	10.8056	-10	0.0694611	4	30.0575	-13.0428	25.8624	-3.81046	8.00562	b4197, b2521, b2415, b3738	2DGLCptspp, ACGAptspp, ACMANAptspp, ACMUMptspp, ARBTptspp, ASCBptspp, ATPS4rpp, CELBpts, CHTBSptspp, DHAPT, FRUpts2pp, FRUptspp, GALTptspp, GAMptspp, GLCptspp, MALTptspp, MANGLYCptspp, MANptspp, MCPST, MNLptspp, SBTptspp, SUCptspp, TREptspp
9835	-49.5361	EX_succ_e	10.8056	-10	0.0694611	4	30.0575	-13.0428	25.8624	-3.81046	8.00562	b1732, b2415, b3736, b2254	2DGLCptspp, ACGAptspp, ACMANAptspp, ACMUMptspp, ARBTptspp, ASCBptspp, ATPS4rpp, CELBpts, CHTBSptspp, DHAPT, FRUpts2pp, FRUptspp, GALTptspp, GAMptspp, GLCptspp, MALTptspp, MANGLYCptspp, MANptspp, MNLptspp, SBTptspp, SUCptspp, TREptspp, UPLA4FNT
9836	-49.5361	EX_succ_e	10.8056	-10	0.0694611	4	30.0575	-13.0428	25.8624	-3.81046	8.00562	b1590, b2415, b4260, b3732	2DGLCptspp, ACGAptspp, ACMANAptspp, ACMUMptspp, ARBTptspp, ASCBptspp, ATPS4rpp, CELBpts, CHTBSptspp, DHAPT, FRUpts2pp, FRUptspp, GALTptspp, GAMptspp, GLCptspp, MALTptspp, MANGLYCptspp, MANptspp, MNLptspp, SBTptspp, SELR, SUCptspp, TREptspp
9837	-49.5361	EX_succ_e	10.8056	-10	0.0694611	4	30.0575	-13.0428	25.8624	-3.81046	8.00562	b2465, b2415, b1622, b3736	2DGLCptspp, ACGAptspp, ACMANAptspp, ACMUMptspp, ARBTptspp, ASCBptspp, ATPS4rpp, CELBpts, CHTBSptspp, DHAPT, FRUpts2pp, FRUptspp, GALTptspp, GAMptspp, GLCptspp, MALTptspp, MANGLYCptspp, MANptspp, MNLptspp, SBTptspp, SUCptspp, TREptspp
9838	-49.5361	EX_succ_e	10.8056	-10	0.0694611	4	30.0575	-13.0428	25.8624	-3.81046	8.00562	b1676, b2415, b3732, b3734	2DGLCptspp, ACGAptspp, ACMANAptspp, ACMUMptspp, ARBTptspp, ASCBptspp, ATPS4rpp, CELBpts, CHTBSptspp, DHAPT, FRUpts2pp, FRUptspp, GALTptspp, GAMptspp, GLCptspp, MALTptspp, MANGLYCptspp, MANptspp, MNLptspp, SBTptspp, SUCptspp, TREptspp
9839	-49.5361	EX_succ_e	10.8056	-10	0.0694611	4	30.0575	-13.0428	25.8624	-3.81046	8.00562	b4146, b2415, b3736, b2975	2DGLCptspp, ACGAptspp, ACMANAptspp, ACMUMptspp, ARBTptspp, ASCBptspp, ATPS4rpp, CELBpts, CHTBSptspp, DHAPT, FRUpts2pp, FRUptspp, GALTptspp, GAMptspp, GLCptspp, LYSAM, MALTptspp, MANGLYCptspp, MANptspp, MNLptspp, SBTptspp, SUCptspp, TREptspp
9840	-49.5361	EX_succ_e	10.8056	-10	0.0694611	4	30.0575	-13.0428	25.8624	-3.81046	8.00562	b2415, b0366, b3738, b1798	2DGLCptspp, ACGAptspp, ACMANAptspp, ACMUMptspp, ARBTptspp, ASCBptspp, ATPS4rpp, CELBpts, CHTBSptspp, DHAPT, FRUpts2pp, FRUptspp, GALTptspp, GAMptspp, GLCptspp, MALTptspp, MANGLYCptspp, MANptspp, MNLptspp, SBTptspp, SUCptspp, TAURabcpp, TREptspp
9841	-49.5361	EX_succ_e	10.8056	-10	0.0694611	4	30.0575	-13.0428	25.8624	-3.81046	8.00562	b2415, b2429, b3732, b3737	2DGLCptspp, ACGAptspp, ACMANAptspp, ACMUMptspp, ARBTptspp, ASCBptspp, ATPS4rpp, CELBpts, CHTBSptspp, DHAPT, FRUpts2pp, FRUptspp, GALTptspp, GAMptspp, GLCptspp, MALTptspp, MANGLYCptspp, MANptspp, MNLptspp, SBTptspp, SUCptspp, TREptspp
9842	-49.5361	EX_succ_e	10.8056	-10	0.0694611	4	30.0575	-13.0428	25.8624	-3.81046	8.00562	b2415, b3732, b3734, b2796	2DGLCptspp, ACGAptspp, ACMANAptspp, ACMUMptspp, ARBTptspp, ASCBptspp, ATPS4rpp, CELBpts, CHTBSptspp, DHAPT, FRUpts2pp, FRUptspp, GALTptspp, GAMptspp, GLCptspp, MALTptspp, MANGLYCptspp, MANptspp, MNLptspp, SBTptspp, SUCptspp, TREptspp
9843	-49.5361	EX_succ_e	10.8056	-10	0.0694611	4	30.0575	-13.0428	25.8624	-3.81046	8.00562	b2415, b3738, b2254, b3878	2DGLCptspp, ACGAptspp, ACMANAptspp, ACMUMptspp, ARBTptspp, ASCBptspp, ATPS4rpp, CELBpts, CHTBSptspp, DHAPT, FRUpts2pp, FRUptspp, GALTptspp, GAMptspp, GLCptspp, MALTptspp, MANGLYCptspp, MANptspp, MNLptspp, SBTptspp, SQGH, SUCptspp, TREptspp, UPLA4FNT
9844	-49.5361	EX_succ_e	10.8056	-10	0.0694611	4	30.0575	-13.0428	25.8624	-3.81046	8.00562	b4054, b2415, b3744, b3738	2DGLCptspp, ACGAptspp, ACMANAptspp, ACMUMptspp, ARBTptspp, ASCBptspp, ATPS4rpp, CELBpts, CHTBSptspp, DHAPT, FRUpts2pp, FRUptspp, GALTptspp, GAMptspp, GLCptspp, MALTptspp, MANGLYCptspp, MANptspp, MNLptspp, SBTptspp, SUCptspp, TREptspp
9845	-49.5361	EX_succ_e	10.8056	-10	0.0694611	4	30.0575	-13.0428	25.8624	-3.81046	8.00562	b2415, b2489, b3738, b2256	2DGLCptspp, ACGAptspp, ACMANAptspp, ACMUMptspp, ARBTptspp, ASCBptspp, ATPS4rpp, CELBpts, CHTBSptspp, DHAPT, FRUpts2pp, FRUptspp, GALTptspp, GAMptspp, GLCptspp, MALTptspp, MANGLYCptspp, MANptspp, MNLptspp, SBTptspp, SUCptspp, TREptspp, UPLA4FNF
9846	-49.5361	EX_succ_e	10.8056	-10	0.0694611	4	30.0575	-13.0428	25.8624	-3.81046	8.00562	b2415, b3732, b1330, b2796	2DGLCptspp, ACGAptspp, ACMANAptspp, ACMUMptspp, ARBTptspp, ASCBptspp, ATPS4rpp, CELBpts, CHTBSptspp, DHAPT, FRUpts2pp, FRUptspp, GALTptspp, GAMptspp, GLCptspp, MALTptspp, MANGLYCptspp, MANptspp, MNLptspp, SBTptspp, SUCptspp, TREptspp
9847	-49.5361	EX_succ_e	10.8056	-10	0.0694611	4	30.0575	-13.0428	25.8624	-3.81046	8.00562	b2415, b3736, b3603, b0484	2DGLCptspp, ACGAptspp, ACMANAptspp, ACMUMptspp, ARBTptspp, ASCBptspp, ATPS4rpp, CELBpts, CHTBSptspp, CU1abcpp, DHAPT, FRUpts2pp, FRUptspp, GALTptspp, GAMptspp, GLCptspp, MALTptspp, MANGLYCptspp, MANptspp, MNLptspp, SBTptspp, SUCptspp, TREptspp
9848	-49.5361	EX_succ_e	10.8056	-10	0.0694611	4	30.0575	-13.0428	25.8624	-3.81046	8.00562	b2415, b3359, b2423, b3732	2DGLCptspp, ACGAptspp, ACMANAptspp, ACMUMptspp, ARBTptspp, ASCBptspp, ATPS4rpp, CELBpts, CHTBSptspp, DHAPT, FRUpts2pp, FRUptspp, GALTptspp, GAMptspp, GLCptspp, MALTptspp, MANGLYCptspp, MANptspp, MNLptspp, SBTptspp, SELabcpp, SLNTabcpp, SUCptspp, TREptspp, TSULabcpp
9849	-49.5361	EX_succ_e	10.8056	-10	0.0694611	4	30.0575	-13.0428	25.8624	-3.81046	8.00562	b2415, b1465, b2483, b3732	2DGLCptspp, ACGAptspp, ACMANAptspp, ACMUMptspp, ARBTptspp, ASCBptspp, ATPS4rpp, CELBpts, CHTBSptspp, DHAPT, FRUpts2pp, FRUptspp, GALTptspp, GAMptspp, GLCptspp, MALTptspp, MANGLYCptspp, MANptspp, MNLptspp, SBTptspp, SUCptspp, TREptspp
9850	-49.5361	EX_succ_e	10.8056	-10	0.0694611	4	30.0575	-13.0428	25.8624	-3.81046	8.00562	b1096, b2415, b0574, b3736	2DGLCptspp, ACGAptspp, ACMANAptspp, ACMUMptspp, AGt3, ARBTptspp, ASCBptspp, ATPS4rpp, CELBpts, CHTBSptspp, CUt3, DHAPT, FRUpts2pp, FRUptspp, GALTptspp, GAMptspp, GLCptspp, MALTptspp, MANGLYCptspp, MANptspp, MNLptspp, SBTptspp, SUCptspp, TREptspp
9851	-49.5361	EX_succ_e	10.8056	-10	0.0694611	4	30.0575	-13.0428	25.8624	-3.81046	8.00562	b3197, b2415, b3736, b4159	2DGLCptspp, ACGAptspp, ACMANAptspp, ACMUMptspp, ARBTptspp, ASCBptspp, ATPS4rpp, CELBpts, CHTBSptspp, DHAPT, FRUpts2pp, FRUptspp, GALTptspp, GAMptspp, GLCptspp, MALTptspp, MANGLYCptspp, MANptspp, MNLptspp, SBTptspp, SUCptspp, TREptspp
9852	-49.5361	EX_succ_e	10.8056	-10	0.0694611	4	30.0575	-13.0428	25.8624	-3.81046	8.00562	b2415, b3732, b0376, b2796	2DGLCptspp, ACGAptspp, ACMANAptspp, ACMUMptspp, ARBTptspp, ASCBptspp, ATPS4rpp, CELBpts, CHTBSptspp, DHAPT, FRUpts2pp, FRUptspp, GALTptspp, GAMptspp, GLCptspp, MALTptspp, MANGLYCptspp, MANptspp, MNLptspp, SBTptspp, SUCptspp, TREptspp
9853	-49.5361	EX_succ_e	10.8056	-10	0.0694611	4	30.0575	-13.0428	25.8624	-3.81046	8.00562	b2415, b2787, b3738, b0268	2DGLCptspp, ACGAptspp, ACMANAptspp, ACMUMptspp, ARBTptspp, ASCBptspp, ATPS4rpp, CELBpts, CHTBSptspp, DHAPT, FRUpts2pp, FRUptspp, GALTptspp, GAMptspp, GLCptspp, MALTptspp, MANGLYCptspp, MANptspp, MNLptspp, SBTptspp, SUCptspp, TREptspp
9854	-49.5361	EX_succ_e	10.8056	-10	0.0694611	4	30.0575	-13.0428	25.8624	-3.81046	8.00562	b2415, b2206, b0366, b3732	2DGLCptspp, ACGAptspp, ACMANAptspp, ACMUMptspp, ARBTptspp, ASCBptspp, ATPS4rpp, CELBpts, CHTBSptspp, DHAPT, FRUpts2pp, FRUptspp, GALTptspp, GAMptspp, GLCptspp, MALTptspp, MANGLYCptspp, MANptspp, MNLptspp, NO3R1bpp, NO3R2bpp, SBTptspp, SUCptspp, TAURabcpp, TREptspp
9855	-49.5361	EX_succ_e	10.8056	-10	0.0694611	4	30.0575	-13.0428	25.8624	-3.81046	8.00562	b3812, b1317, b2415, b3732	2DGLCptspp, ACGAptspp, ACMANAptspp, ACMUMptspp, ARBTptspp, ASCBptspp, ATPS4rpp, CELBpts, CHTBSptspp, DHAPT, FRUpts2pp, FRUptspp, GALTptspp, GAMptspp, GLCptspp, MALTptspp, MANGLYCptspp, MANptspp, MNLptspp, SBTptspp, SUCptspp, TREptspp
9856	-49.5361	EX_succ_e	10.8056	-10	0.0694611	4	30.0575	-13.0428	25.8624	-3.81046	8.00562	b2415, b3736, b2893, b1185	2DGLCptspp, ACGAptspp, ACMANAptspp, ACMUMptspp, ARBTptspp, ASCBptspp, ATPS4rpp, CELBpts, CHTBSptspp, DHAPT, DSBAO1, DSBAO2, DSBCGT, FRUpts2pp, FRUptspp, GALTptspp, GAMptspp, GLCptspp, MALTptspp, MANGLYCptspp, MANptspp, MNLptspp, SBTptspp, SUCptspp, TDSR1, TREptspp
9857	-49.5361	EX_succ_e	10.8056	-10	0.0694611	4	30.0575	-13.0428	25.8624	-3.81046	8.00562	b1106, b2415, b3736, b2254	2DGLCptspp, ACGAptspp, ACMANAptspp, ACMUMptspp, ARBTptspp, ASCBptspp, ATPS4rpp, CELBpts, CHTBSptspp, DHAPT, FRUpts2pp, FRUptspp, GALTptspp, GAMptspp, GLCptspp, MALTptspp, MANGLYCptspp, MANptspp, MNLptspp, SBTptspp, SUCptspp, TMK, TREptspp, UPLA4FNT
9858	-49.5361	EX_succ_e	10.8056	-10	0.0694611	4	30.0575	-13.0428	25.8624	-3.81046	8.00562	b1992, b0732, b2415, b3738	2DGLCptspp, ACGAptspp, ACMANAptspp, ACMUMptspp, ADOCBLS, ARBTptspp, ASCBptspp, ATPS4rpp, CELBpts, CHTBSptspp, DHAPT, FRUpts2pp, FRUptspp, GALTptspp, GAMptspp, GLCptspp, MALTptspp, MANGLYCptspp, MANPGH, MANptspp, MNLptspp, SBTptspp, SUCptspp, TREptspp
9859	-49.5361	EX_succ_e	10.8056	-10	0.0694611	4	30.0575	-13.0428	25.8624	-3.81046	8.00562	b2415, b3732, b0336, b0307	2DGLCptspp, ACGAptspp, ACMANAptspp, ACMUMptspp, ARBTptspp, ASCBptspp, ATPS4rpp, CELBpts, CHTBSptspp, CSNt2pp, DHAPT, FRUpts2pp, FRUptspp, GALTptspp, GAMptspp, GLCptspp, MALTptspp, MANGLYCptspp, MANptspp, MNLptspp, SBTptspp, SUCptspp, TREptspp
9860	-49.5361	EX_succ_e	10.8056	-10	0.0694611	4	30.0575	-13.0428	25.8624	-3.81046	8.00562	b2415, b3732, b0376, b3496	2DGLCptspp, ACGAptspp, ACMANAptspp, ACMUMptspp, ARBTptspp, ASCBptspp, ATPS4rpp, CELBpts, CHTBSptspp, DHAPT, FRUpts2pp, FRUptspp, GALTptspp, GAMptspp, GLCptspp, MALTptspp, MANGLYCptspp, MANptspp, MNLptspp, SBTptspp, SUCptspp, TREptspp
9861	-49.5361	EX_succ_e	10.8056	-10	0.0694611	4	30.0575	-13.0428	25.8624	-3.81046	8.00562	b2415, b3736, b2430, b0211	2DGLCptspp, ACGAptspp, ACMANAptspp, ACMUMptspp, ARBTptspp, ASCBptspp, ATPS4rpp, CELBpts, CHTBSptspp, DHAPT, FRUpts2pp, FRUptspp, GALTptspp, GAMptspp, GLCptspp, MALTptspp, MANGLYCptspp, MANptspp, MNLptspp, SBTptspp, SUCptspp, TREptspp
9862	-49.5361	EX_succ_e	10.8056	-10	0.0694611	4	30.0575	-13.0428	25.8624	-3.81046	8.00562	b2415, b3732, b4311, b3857	2DGLCptspp, ACGAptspp, ACMANAptspp, ACMUMptspp, ARBTptspp, ASCBptspp, ATPS4rpp, BMOGDS1, BMOGDS2, BWCOGDS1, BWCOGDS2, CELBpts, CHTBSptspp, DHAPT, FRUpts2pp, FRUptspp, GALTptspp, GAMptspp, GLCptspp, MALTptspp, MANGLYCptspp, MANptspp, MNLptspp, MOGDS, SBTptspp, SUCptspp, TREptspp
9863	-49.5361	EX_succ_e	10.8056	-10	0.0694611	4	30.0575	-13.0428	25.8624	-3.81046	8.00562	b2415, b4240, b3732, b1223	2DGLCptspp, ACGAptspp, ACMANAptspp, ACMUMptspp, ARBTptspp, ASCBptspp, ATPS4rpp, CELBpts, CHTBSptspp, DHAPT, FRUpts2pp, FRUptspp, GALTptspp, GAMptspp, GLCptspp, MALTptspp, MANGLYCptspp, MANptspp, MNLptspp, SBTptspp, SUCptspp, TREptspp
9864	-49.5361	EX_succ_e	10.8056	-10	0.0694611	4	30.0575	-13.0428	25.8624	-3.81046	8.00562	b2415, b3738, b3476, b2094	2DGLCptspp, ACGAptspp, ACMANAptspp, ACMUMptspp, ARBTptspp, ASCBptspp, ATPS4rpp, CELBpts, CHTBSptspp, DHAPT, FRUpts2pp, FRUptspp, GALTptspp, GAMptspp, GLCptspp, MALTptspp, MANGLYCptspp, MANptspp, MNLptspp, SBTptspp, SUCptspp, TREptspp
9865	-49.5361	EX_succ_e	10.8056	-10	0.0694611	4	30.0575	-13.0428	25.8624	-3.81046	8.00562	b3225, b2415, b3736, b3125	2DGLCptspp, ACGAptspp, ACMANAptspp, ACMUMptspp, ACNML, ARBTptspp, ASCBptspp, ATPS4rpp, CELBpts, CHTBSptspp, DHAPT, FRUpts2pp, FRUptspp, GALTptspp, GAMptspp, GLCptspp, MALTptspp, MANGLYCptspp, MANptspp, MNLptspp, SBTptspp, SUCptspp, TREptspp
9866	-49.5361	EX_succ_e	10.8056	-10	0.0694611	4	30.0575	-13.0428	25.8624	-3.81046	8.00562	b2415, b4477, b3738, b4100	2DGLCptspp, ACGAptspp, ACMANAptspp, ACMUMptspp, ARBTptspp, ARMEPNS, ASCBptspp, ATPS4rpp, CELBpts, CHTBSptspp, DDPGALA, DHAPT, FRUpts2pp, FRUptspp, GALTptspp, GAMptspp, GLCptspp, MALTptspp, MANGLYCptspp, MANptspp, MNLptspp, SBTptspp, SUCptspp, TREptspp
9867	-49.5361	EX_succ_e	10.8056	-10	0.0694611	4	30.0575	-13.0428	25.8624	-3.81046	8.00562	b2415, b0867, b1246, b3736	2DGLCptspp, ACGAptspp, ACMANAptspp, ACMUMptspp, ARBTptspp, ASCBptspp, ATPS4rpp, CELBpts, CHTBSptspp, DHAPT, FRUpts2pp, FRUptspp, GALTptspp, GAMptspp, GLCptspp, MALTptspp, MANGLYCptspp, MANptspp, MNLptspp, SBTptspp, SUCptspp, TREptspp
9868	-49.5361	EX_succ_e	10.8056	-10	0.0694611	4	30.0575	-13.0428	25.8624	-3.81046	8.00562	b2415, b2095, b3732, b3734	2DGLCptspp, ACGAptspp, ACMANAptspp, ACMUMptspp, ARBTptspp, ASCBptspp, ATPS4rpp, CELBpts, CHTBSptspp, DHAPT, FRUpts2pp, FRUptspp, GALTptspp, GAMptspp, GLCptspp, MALTptspp, MANGLYCptspp, MANptspp, MNLptspp, SBTptspp, SUCptspp, TREptspp
9869	-49.5361	EX_succ_e	10.8056	-10	0.0694611	4	30.0575	-13.0428	25.8624	-3.81046	8.00562	b2415, b2204, b1363, b3732	2DGLCptspp, ACGAptspp, ACMANAptspp, ACMUMptspp, ARBTptspp, ASCBptspp, ATPS4rpp, CELBpts, CHTBSptspp, DHAPT, FRUpts2pp, FRUptspp, GALTptspp, GAMptspp, GLCptspp, MALTptspp, MANGLYCptspp, MANptspp, MNLptspp, NO3R1bpp, SBTptspp, SUCptspp, TREptspp
9870	-49.5361	EX_succ_e	10.8056	-10	0.0694611	4	30.0575	-13.0428	25.8624	-3.81046	8.00562	b2414, b2415, b3736, b0509	2DGLCptspp, ACGAptspp, ACMANAptspp, ACMUMptspp, ARBTptspp, ASCBptspp, ATPS4rpp, CELBpts, CHTBSptspp, DHAPT, FRUpts2pp, FRUptspp, GALTptspp, GAMptspp, GLCptspp, MALTptspp, MANGLYCptspp, MANptspp, MNLptspp, SBTptspp, SUCptspp, TREptspp
9871	-49.5361	EX_succ_e	10.8056	-10	0.0694611	4	30.0575	-13.0428	25.8624	-3.81046	8.00562	b1302, b2415, b2539, b3732	2DGLCptspp, ACGAptspp, ACMANAptspp, ACMUMptspp, ARBTptspp, ASCBptspp, ATPS4rpp, CELBpts, CHTBSptspp, CINNDO, DHAPT, FRUpts2pp, FRUptspp, GALTptspp, GAMptspp, GLCptspp, MALTptspp, MANGLYCptspp, MANptspp, MNLptspp, PPPNDO, SBTptspp, SUCptspp, TREptspp
9872	-49.5361	EX_succ_e	10.8056	-10	0.0694611	4	30.0575	-13.0428	25.8624	-3.81046	8.00562	b2415, b3224, b3736, b4337	2DGLCptspp, ACGAptspp, ACMANAptspp, ACMUMptspp, ACNAMt2pp, ARBTptspp, ASCBptspp, ATPS4rpp, CELBpts, CHOLATEtpp, CHTBSptspp, DHAPT, FRUpts2pp, FRUptspp, GALTptspp, GAMptspp, GLCptspp, MALTptspp, MANGLYCptspp, MANptspp, MNLptspp, SBTptspp, SUCptspp, TREptspp
9873	-49.5361	EX_succ_e	10.8056	-10	0.0694611	4	30.0575	-13.0428	25.8624	-3.81046	8.00562	b2415, b3732, b0124, b1400	2DGLCptspp, 2HPTCOAT, ACGAptspp, ACMANAptspp, ACMUMptspp, ARBTptspp, ASCBptspp, ATPS4rpp, CELBpts, CHTBSptspp, DHAPT, FRUpts2pp, FRUptspp, GALTptspp, GAMptspp, GLCptspp, MALTptspp, MANGLYCptspp, MANptspp, MNLptspp, SBTptspp, SUCptspp, TREptspp
9874	-49.5361	EX_succ_e	10.8056	-10	0.0694611	4	30.0575	-13.0428	25.8624	-3.81046	8.00562	b2415, b0828, b3732, b0576	2DGLCptspp, ACGAptspp, ACMANAptspp, ACMUMptspp, ARBTptspp, ASCBptspp, ATPS4rpp, CELBpts, CHTBSptspp, DHAPT, FRUpts2pp, FRUptspp, GALTptspp, GAMptspp, GLCptspp, MALTptspp, MANGLYCptspp, MANptspp, MNLptspp, SBTptspp, SUCptspp, TREptspp
9875	-49.5361	EX_succ_e	10.8056	-10	0.0694611	4	30.0575	-13.0428	25.8624	-3.81046	8.00562	b2415, b3732, b3001, b3415	2DGLCptspp, ACGAptspp, ACMANAptspp, ACMUMptspp, ARBTptspp, ASCBptspp, ATPS4rpp, CELBpts, CHTBSptspp, DHAPT, FRUpts2pp, FRUptspp, GALTptspp, GAMptspp, GLCptspp, MALTptspp, MANGLYCptspp, MANptspp, MNLptspp, SBTptspp, SUCptspp, TREptspp
9876	-49.5361	EX_succ_e	10.8056	-10	0.0694611	4	30.0575	-13.0428	25.8624	-3.81046	8.00562	b3475, b2415, b1701, b3732	2DGLCptspp, ACGAptspp, ACMANAptspp, ACMUMptspp, ARBTptspp, ASCBptspp, ATPS4rpp, CELBpts, CHTBSptspp, DHAPT, FRUpts2pp, FRUptspp, GALTptspp, GAMptspp, GLCptspp, MALTptspp, MANGLYCptspp, MANptspp, MNLptspp, SBTptspp, SUCptspp, TREptspp
9877	-49.5361	EX_succ_e	10.8056	-10	0.0694611	4	30.0575	-13.0428	25.8624	-3.81046	8.00562	b2415, b3736, b1223, b1476	2DGLCptspp, ACGAptspp, ACMANAptspp, ACMUMptspp, ARBTptspp, ASCBptspp, ATPS4rpp, CELBpts, CHTBSptspp, DHAPT, FRUpts2pp, FRUptspp, GALTptspp, GAMptspp, GLCptspp, MALTptspp, MANGLYCptspp, MANptspp, MNLptspp, SBTptspp, SUCptspp, TREptspp
9878	-49.5361	EX_succ_e	10.8056	-10	0.0694611	4	30.0575	-13.0428	25.8624	-3.81046	8.00562	b0348, b2415, b3732, b3240	2DGLCptspp, 4HBZt3pp, ACGAptspp, ACMANAptspp, ACMUMptspp, ARBTptspp, ASCBptspp, ATPS4rpp, CELBpts, CHTBSptspp, DHAPT, DHCINDO, FRUpts2pp, FRUptspp, GALTptspp, GAMptspp, GLCptspp, HPPPNDO, MALTptspp, MANGLYCptspp, MANptspp, MNLptspp, SBTptspp, SUCptspp, TREptspp
9879	-49.5361	EX_succ_e	10.8056	-10	0.0694611	4	30.0575	-13.0428	25.8624	-3.81046	8.00562	b3885, b2415, b3736, b1469	2DGLCptspp, ACGAptspp, ACMANAptspp, ACMUMptspp, ARBTptspp, ASCBptspp, ATPS4rpp, CELBpts, CHTBSptspp, DHAPT, FRUpts2pp, FRUptspp, GALTptspp, GAMptspp, GLCptspp, MALTptspp, MANGLYCptspp, MANptspp, MNLptspp, SBTptspp, SUCptspp, TREptspp
9880	-49.5361	EX_succ_e	10.8056	-10	0.0694611	4	30.0575	-13.0428	25.8624	-3.81046	8.00562	b2415, b4219, b3736, b2257	2DGLCptspp, ACGAptspp, ACMANAptspp, ACMUMptspp, ARBTptspp, ASCBptspp, ATPS4rpp, CELBpts, CHTBSptspp, DHAPT, FRUpts2pp, FRUptspp, GALTptspp, GAMptspp, GLCptspp, LA4NTpp, MALTptspp, MANGLYCptspp, MANptspp, MNLptspp, SBTptspp, SUCptspp, TREptspp
9881	-49.5361	EX_succ_e	10.8056	-10	0.0694611	4	30.0575	-13.0428	25.8624	-3.81046	8.00562	b2415, b3732, b3458, b4485	2DGLCptspp, ACGAptspp, ACMANAptspp, ACMUMptspp, ARBTptspp, ASCBptspp, ATPS4rpp, CELBpts, CHTBSptspp, DHAPT, FRUpts2pp, FRUptspp, GALTptspp, GAMptspp, GLCptspp, MALTptspp, MANGLYCptspp, MANptspp, MNLptspp, SBTptspp, SUCptspp, TREptspp
9882	-49.5361	EX_succ_e	10.8056	-10	0.0694611	4	30.0575	-13.0428	25.8624	-3.81046	8.00562	b3788, b2415, b1805, b3732	2DGLCptspp, ACGAptspp, ACMANAptspp, ACMUMptspp, ARBTptspp, ASCBptspp, ATPS4rpp, CELBpts, CHTBSptspp, DHAPT, FRUpts2pp, FRUptspp, GALTptspp, GAMptspp, GLCptspp, MALTptspp, MANGLYCptspp, MANptspp, MNLptspp, SBTptspp, SUCptspp, TREptspp
9883	-49.5361	EX_succ_e	10.8056	-10	0.0694611	4	30.0575	-13.0428	25.8624	-3.81046	8.00562	b1241, b3951, b2415, b3736	2DGLCptspp, ACGAptspp, ACMANAptspp, ACMUMptspp, ARBTptspp, ASCBptspp, ATPS4rpp, CELBpts, CHTBSptspp, DHAPT, FRUpts2pp, FRUptspp, GALTptspp, GAMptspp, GLCptspp, MALTptspp, MANGLYCptspp, MANptspp, MNLptspp, SBTptspp, SUCptspp, TREptspp
9884	-49.5361	EX_succ_e	10.8056	-10	0.0694611	4	30.0575	-13.0428	25.8624	-3.81046	8.00562	b4054, b2415, b3224, b3736	2DGLCptspp, ACGAptspp, ACMANAptspp, ACMUMptspp, ACNAMt2pp, ARBTptspp, ASCBptspp, ATPS4rpp, CELBpts, CHTBSptspp, DHAPT, FRUpts2pp, FRUptspp, GALTptspp, GAMptspp, GLCptspp, MALTptspp, MANGLYCptspp, MANptspp, MNLptspp, SBTptspp, SUCptspp, TREptspp
9885	-49.5361	EX_succ_e	10.8056	-10	0.0694611	4	30.0575	-13.0428	25.8624	-3.81046	8.00562	b2415, b3736, b0353, b3883	2DGLCptspp, 6D6SFK, ACGAptspp, ACMANAptspp, ACMUMptspp, ARBTptspp, ASCBptspp, ATPS4rpp, CELBpts, CHTBSptspp, DHAPT, FRUpts2pp, FRUptspp, GALTptspp, GAMptspp, GLCptspp, HCINNMt2rpp, HPPPNt2rpp, MALTptspp, MANGLYCptspp, MANptspp, MNLptspp, SBTptspp, SUCptspp, TREptspp
9886	-49.5361	EX_succ_e	10.8056	-10	0.0694611	4	30.0575	-13.0428	25.8624	-3.81046	8.00562	b3575, b2415, b3732, b1617	2DGLCptspp, ACGAptspp, ACMANAptspp, ACMUMptspp, ARBTptspp, ASCBptspp, ATPS4rpp, CELBpts, CHTBSptspp, DHAPT, DOGULNR, FRUpts2pp, FRUptspp, GALTptspp, GAMptspp, GLCptspp, MALTptspp, MANGLYCptspp, MANptspp, METGLCUR, MNLptspp, SBTptspp, SUCptspp, TREptspp
9887	-49.5361	EX_succ_e	10.8056	-10	0.0694611	4	30.0575	-13.0428	25.8624	-3.81046	8.00562	b2415, b3732, b1678, b3722	2DGLCptspp, ACGAptspp, ACMANAptspp, ACMUMptspp, ARBTptspp, ASCBptspp, ATPS4rpp, CELBpts, CHTBSptspp, DHAPT, FRUpts2pp, FRUptspp, GALTptspp, GAMptspp, GLCptspp, MALTptspp, MANGLYCptspp, MANptspp, MNLptspp, SBTptspp, SUCptspp, TREptspp
9888	-49.5361	EX_succ_e	10.8056	-10	0.0694611	4	30.0575	-13.0428	25.8624	-3.81046	8.00562	b3222, b2415, b3736, b3603	2DGLCptspp, ACGAptspp, ACMANAptspp, ACMUMptspp, AMANK, ARBTptspp, ASCBptspp, ATPS4rpp, CELBpts, CHTBSptspp, DHAPT, FRUpts2pp, FRUptspp, GALTptspp, GAMptspp, GLCptspp, MALTptspp, MANGLYCptspp, MANptspp, MNLptspp, SBTptspp, SUCptspp, TREptspp
9889	-49.5361	EX_succ_e	10.8056	-10	0.0694611	4	30.0575	-13.0428	25.8624	-3.81046	8.00562	b3225, b2415, b3732, b0307	2DGLCptspp, ACGAptspp, ACMANAptspp, ACMUMptspp, ACNML, ARBTptspp, ASCBptspp, ATPS4rpp, CELBpts, CHTBSptspp, DHAPT, FRUpts2pp, FRUptspp, GALTptspp, GAMptspp, GLCptspp, MALTptspp, MANGLYCptspp, MANptspp, MNLptspp, SBTptspp, SUCptspp, TREptspp
9890	-49.5361	EX_succ_e	10.8056	-10	0.0694611	4	30.0575	-13.0428	25.8624	-3.81046	8.00562	b2415, b3732, b0973, b3748	2DGLCptspp, ACGAptspp, ACMANAptspp, ACMUMptspp, ARBTptspp, ASCBptspp, ATPS4rpp, CELBpts, CHTBSptspp, DHAPT, FRUpts2pp, FRUptspp, GALTptspp, GAMptspp, GLCptspp, MALTptspp, MANGLYCptspp, MANptspp, MNLptspp, SBTptspp, SUCptspp, TREptspp
9891	-49.5361	EX_succ_e	10.8056	-10	0.0694611	4	30.0575	-13.0428	25.8624	-3.81046	8.00562	b1759, b2415, b3732, b0693	2DGLCptspp, ACGAptspp, ACMANAptspp, ACMUMptspp, ARBTptspp, ASCBptspp, ATPS4rpp, CELBpts, CHTBSptspp, DHAPT, FRUpts2pp, FRUptspp, GALTptspp, GAMptspp, GLCptspp, MALTptspp, MANGLYCptspp, MANptspp, MNLptspp, SBTptspp, SUCptspp, TREptspp
9892	-49.5361	EX_succ_e	10.8056	-10	0.0694611	4	30.0575	-13.0428	25.8624	-3.81046	8.00562	b2415, b3738, b1486, b0444	2DGLCptspp, ACGAptspp, ACMANAptspp, ACMUMptspp, ARBTptspp, ASCBptspp, ATPS4rpp, CCGS, CELBpts, CHTBSptspp, DHAPT, FRUpts2pp, FRUptspp, GALTptspp, GAMptspp, GLCptspp, MALTptspp, MANGLYCptspp, MANptspp, MNLptspp, SBTptspp, SUCptspp, TREptspp
9893	-49.5361	EX_succ_e	10.8056	-10	0.0694611	4	30.0575	-13.0428	25.8624	-3.81046	8.00562	b2415, b3732, b0315, b2765	2DGLCptspp, ACGAptspp, ACMANAptspp, ACMUMptspp, ARBTptspp, ASCBptspp, ATPS4rpp, CELBpts, CHTBSptspp, CPH4S, DHAPT, FRUpts2pp, FRUptspp, GALTptspp, GAMptspp, GLCptspp, MALTptspp, MANGLYCptspp, MANptspp, MNLptspp, SBTptspp, SUCptspp, TREptspp
9894	-49.5361	EX_succ_e	10.8056	-10	0.0694611	4	30.0575	-13.0428	25.8624	-3.81046	8.00562	b3003, b2415, b3732, b1341	2DGLCptspp, ACGAptspp, ACMANAptspp, ACMUMptspp, ARBTptspp, ASCBptspp, ATPS4rpp, CELBpts, CHTBSptspp, DHAPT, FRUpts2pp, FRUptspp, GALTptspp, GAMptspp, GLCptspp, MALTptspp, MANGLYCptspp, MANptspp, MNLptspp, SBTptspp, SUCptspp, TREptspp
9895	-49.5361	EX_succ_e	10.8056	-10	0.0694611	4	30.0575	-13.0428	25.8624	-3.81046	8.00562	b2415, b3736, b3735, b2975	2DGLCptspp, ACGAptspp, ACMANAptspp, ACMUMptspp, ARBTptspp, ASCBptspp, ATPS4rpp, CELBpts, CHTBSptspp, DHAPT, FRUpts2pp, FRUptspp, GALTptspp, GAMptspp, GLCptspp, MALTptspp, MANGLYCptspp, MANptspp, MNLptspp, SBTptspp, SUCptspp, TREptspp
9896	-49.5361	EX_succ_e	10.8056	-10	0.0694611	4	30.0575	-13.0428	25.8624	-3.81046	8.00562	b0073, b2415, b3732, b0578	2DGLCptspp, ACGAptspp, ACMANAptspp, ACMUMptspp, ARBTptspp, ASCBptspp, ATPS4rpp, CELBpts, CHTBSptspp, DHAPT, DHPTDNR, DHPTDNRN, FRUpts2pp, FRUptspp, GALTptspp, GAMptspp, GLCptspp, MALTptspp, MANGLYCptspp, MANptspp, MNLptspp, SBTptspp, SUCptspp, TREptspp
9897	-49.5361	EX_succ_e	10.8056	-10	0.0694611	4	30.0575	-13.0428	25.8624	-3.81046	8.00562	b0099, b2415, b3732, b3496	2DGLCptspp, ACGAptspp, ACMANAptspp, ACMUMptspp, ARBTptspp, ASCBptspp, ATPS4rpp, CELBpts, CHTBSptspp, DHAPT, FRUpts2pp, FRUptspp, GALTptspp, GAMptspp, GLCptspp, MALTptspp, MANGLYCptspp, MANptspp, MNLptspp, SBTptspp, SUCptspp, TREptspp
9898	-49.5361	EX_succ_e	10.8056	-10	0.0694611	4	30.0575	-13.0428	25.8624	-3.81046	8.00562	b2415, b3736, b2995, b1125	2DGLCptspp, ACGAptspp, ACMANAptspp, ACMUMptspp, ARBTptspp, ASCBptspp, ATPS4rpp, CELBpts, CHTBSptspp, DHAPT, FRUpts2pp, FRUptspp, GALTptspp, GAMptspp, GLCptspp, MALTptspp, MANGLYCptspp, MANptspp, MNLptspp, SBTptspp, SUCptspp, TREptspp
9899	-49.5361	EX_succ_e	10.8056	-10	0.0694611	4	30.0575	-13.0428	25.8624	-3.81046	8.00562	b2415, b2817, b3732, b1475	2DGLCptspp, ACGAptspp, ACMANAptspp, ACMUMptspp, ARBTptspp, ASCBptspp, ATPS4rpp, CELBpts, CHTBSptspp, DHAPT, FRUpts2pp, FRUptspp, GALTptspp, GAMptspp, GLCptspp, MALTptspp, MANGLYCptspp, MANptspp, MNLptspp, SBTptspp, SUCptspp, TREptspp
9900	-49.5361	EX_succ_e	10.8056	-10	0.0694611	4	30.0575	-13.0428	25.8624	-3.81046	8.00562	b2415, b3736, b3503, b0315	2DGLCptspp, ACGAptspp, ACMANAptspp, ACMUMptspp, ARBTptspp, ASCBptspp, ASR, ATPS4rpp, CELBpts, CHTBSptspp, DHAPT, FRUpts2pp, FRUptspp, GALTptspp, GAMptspp, GLCptspp, MALTptspp, MANGLYCptspp, MANptspp, MNLptspp, SBTptspp, SUCptspp, TREptspp
9901	-49.5361	EX_succ_e	10.8056	-10	0.0694611	4	30.0575	-13.0428	25.8624	-3.81046	8.00562	b2415, b0828, b3736, b2255	2DGLCptspp, ACGAptspp, ACMANAptspp, ACMUMptspp, ARBTptspp, ASCBptspp, ATPS4rpp, CELBpts, CHTBSptspp, DHAPT, FRUpts2pp, FRUptspp, GALTptspp, GAMptspp, GLCptspp, MALTptspp, MANGLYCptspp, MANptspp, MNLptspp, SBTptspp, SUCptspp, TREptspp, UDPGDC, ULA4NFT
9902	-49.5361	EX_succ_e	10.8056	-10	0.0694611	4	30.0575	-13.0428	25.8624	-3.81046	8.00562	b1992, b2415, b3732, b4090	2DGLCptspp, ACGAptspp, ACMANAptspp, ACMUMptspp, ADOCBLS, ALLPI, ARBTptspp, ASCBptspp, ATPS4rpp, CELBpts, CHTBSptspp, DHAPT, FRUpts2pp, FRUptspp, GALTptspp, GAMptspp, GLCptspp, MALTptspp, MANGLYCptspp, MANptspp, MNLptspp, SBTptspp, SUCptspp, TREptspp
9903	-49.5361	EX_succ_e	10.8056	-10	0.0694611	4	30.0575	-13.0428	25.8624	-3.81046	8.00562	b2930, b2415, b3732, b3691	2DGLCptspp, ACGAptspp, ACMANAptspp, ACMUMptspp, ARBTptspp, ASCBptspp, ATPS4rpp, CELBpts, CHTBSptspp, DHAPT, FRUpts2pp, FRUptspp, GALCTNt2pp, GALTptspp, GAMptspp, GLCptspp, MALTptspp, MANGLYCptspp, MANptspp, MNLptspp, SBTptspp, SUCptspp, TREptspp
9904	-49.5361	EX_succ_e	10.8056	-10	0.0694611	4	30.0575	-13.0428	25.8624	-3.81046	8.00562	b2415, b0366, b3732, b0092	2DGLCptspp, ACGAptspp, ACMANAptspp, ACMUMptspp, ARBTptspp, ASCBptspp, ATPS4rpp, CELBpts, CHTBSptspp, DHAPT, FRUpts2pp, FRUptspp, GALTptspp, GAMptspp, GLCptspp, MALTptspp, MANGLYCptspp, MANptspp, MNLptspp, SBTptspp, SUCptspp, TAURabcpp, TREptspp
9905	-49.5361	EX_succ_e	10.8056	-10	0.0694611	4	30.0575	-13.0428	25.8624	-3.81046	8.00562	b2415, b3732, b0402, b0269	2DGLCptspp, ACGAptspp, ACMANAptspp, ACMUMptspp, ARBTptspp, ASCBptspp, ATPS4rpp, CELBpts, CHTBSptspp, DHAPT, FRUpts2pp, FRUptspp, GALTptspp, GAMptspp, GLCptspp, MALTptspp, MANGLYCptspp, MANptspp, MNLptspp, SBTptspp, SUCptspp, TREptspp
9906	-49.5361	EX_succ_e	10.8056	-10	0.0694611	4	30.0575	-13.0428	25.8624	-3.81046	8.00562	b2293, b2415, b3736, b2165	2DGLCptspp, ACGAptspp, ACMANAptspp, ACMUMptspp, ARBTptspp, ASCBptspp, ATPS4rpp, CELBpts, CHTBSptspp, DHAPT, FRUpts2pp, FRUptspp, GALTptspp, GAMptspp, GLCptspp, MALTptspp, MANGLYCptspp, MANptspp, MNLptspp, RU5PP, SBTptspp, SUCptspp, TREptspp, YUMPS
9907	-49.5361	EX_succ_e	10.8056	-10	0.0694611	4	30.0575	-13.0428	25.8624	-3.81046	8.00562	b2415, b3732, b0650, b3415	2DGLCptspp, ACGAptspp, ACMANAptspp, ACMUMptspp, ARBTptspp, ASCBptspp, ATPS4rpp, CELBpts, CHTBSptspp, DHAPT, FRUpts2pp, FRUptspp, GALTptspp, GAMptspp, GLCptspp, MALTptspp, MANGLYCptspp, MANptspp, MNLptspp, SBTptspp, SUCptspp, TREptspp
9908	-49.5361	EX_succ_e	10.8056	-10	0.0694611	4	30.0575	-13.0428	25.8624	-3.81046	8.00562	b2415, b3736, b0693, b1483	2DGLCptspp, ACGAptspp, ACMANAptspp, ACMUMptspp, ARBTptspp, ASCBptspp, ATPS4rpp, CELBpts, CHTBSptspp, DHAPT, FRUpts2pp, FRUptspp, GALTptspp, GAMptspp, GLCptspp, MALTptspp, MANGLYCptspp, MANptspp, MNLptspp, SBTptspp, SUCptspp, TREptspp
9909	-49.5361	EX_succ_e	10.8056	-10	0.0694611	4	30.0575	-13.0428	25.8624	-3.81046	8.00562	b2415, b3902, b1711, b3736	2DGLCptspp, ACGAptspp, ACMANAptspp, ACMUMptspp, ADOCBLabcpp, ARBTptspp, ASCBptspp, ATPS4rpp, CBIuabcpp, CBL1abcpp, CELBpts, CHTBSptspp, DHAPT, FRUpts2pp, FRUptspp, GALTptspp, GAMptspp, GLCptspp, MALTptspp, MANGLYCptspp, MANptspp, MNLptspp, RMPA, SBTptspp, SUCptspp, TREptspp
9910	-49.5361	EX_succ_e	10.8056	-10	0.0694611	4	30.0575	-13.0428	25.8624	-3.81046	8.00562	b0896, b2415, b3736, b2480	2DGLCptspp, ACGAptspp, ACMANAptspp, ACMUMptspp, ARBTptspp, ASCBptspp, ATPS4rpp, CELBpts, CHTBSptspp, DHAPT, DMSOR2, FRUpts2pp, FRUptspp, GALTptspp, GAMptspp, GLCptspp, MALTptspp, MANGLYCptspp, MANptspp, MNLptspp, SBTptspp, SUCptspp, TMAOR2, TREptspp
9911	-49.5361	EX_succ_e	10.8056	-10	0.0694611	4	30.0575	-13.0428	25.8624	-3.81046	8.00562	b4197, b2415, b3732, b4120	2DGLCptspp, ACGAptspp, ACMANAptspp, ACMUMptspp, ARBTptspp, ASCBptspp, ATPS4rpp, CELBpts, CHTBSptspp, DHAPT, FRUpts2pp, FRUptspp, GALTptspp, GAMptspp, GLCptspp, MALTptspp, MANGLYCptspp, MANptspp, MNLptspp, SBTptspp, SUCptspp, TREptspp
9912	-49.5361	EX_succ_e	10.8056	-10	0.0694611	4	30.0575	-13.0428	25.8624	-3.81046	8.00562	b1200, b2415, b3736, b4231	2DGLCptspp, ACGAptspp, ACMANAptspp, ACMUMptspp, ARBTptspp, ASCBptspp, ATPS4rpp, CELBpts, CHTBSptspp, DHAPT, FRUpts2pp, FRUptspp, GALTptspp, GAMptspp, GLCptspp, MALTptspp, MANGLYCptspp, MANptspp, MNLptspp, SBTptspp, SUCptspp, TREptspp
9913	-49.5361	EX_succ_e	10.8056	-10	0.0694611	4	30.0575	-13.0428	25.8624	-3.81046	8.00562	b2415, b3732, b4033, b0578	14GLUCANabcpp, 2DGLCptspp, ACGAptspp, ACMANAptspp, ACMUMptspp, ARBTptspp, ASCBptspp, ATPS4rpp, CELBpts, CHTBSptspp, DHAPT, DHPTDNR, DHPTDNRN, FRUpts2pp, FRUptspp, GALTptspp, GAMptspp, GLCptspp, MALTHXabcpp, MALTPTabcpp, MALTTRabcpp, MALTTTRabcpp, MALTabcpp, MALTptspp, MANGLYCptspp, MANptspp, MNLptspp, SBTptspp, SUCptspp, TREptspp
9914	-49.5361	EX_succ_e	10.8056	-10	0.0694611	4	30.0575	-13.0428	25.8624	-3.81046	8.00562	b2415, b3385, b3736, b4095	2DGLCptspp, ACGAptspp, ACMANAptspp, ACMUMptspp, ARBTptspp, ASCBptspp, ATPS4rpp, CELBpts, CHTBSptspp, DHAPT, FRUpts2pp, FRUptspp, GALTptspp, GAMptspp, GLCptspp, MALTptspp, MANGLYCptspp, MANptspp, MNLptspp, PGLYCP, RPNTPH, SBTptspp, SUCptspp, TREptspp
9915	-49.5361	EX_succ_e	10.8056	-10	0.0694611	4	30.0575	-13.0428	25.8624	-3.81046	8.00562	b3553, b2502, b2415, b3736	2DGLCptspp, 2DGULRGx, 2DGULRGy, 2DGULRx, 2DGULRy, ACGAptspp, ACMANAptspp, ACMUMptspp, ARBTptspp, ASCBptspp, ATPS4rpp, CELBpts, CHTBSptspp, DHAPT, DKGLCNR2x, DKGLCNR2y, FRUpts2pp, FRUptspp, GALTptspp, GAMptspp, GLCptspp, MALTptspp, MANGLYCptspp, MANptspp, MNLptspp, SBTptspp, SUCptspp, TREptspp
9916	-49.5361	EX_succ_e	10.8056	-10	0.0694611	4	30.0575	-13.0428	25.8624	-3.81046	8.00562	b3908, b2415, b3732, b0875	2DGLCptspp, ACGAptspp, ACMANAptspp, ACMUMptspp, ARBTptspp, ASCBptspp, ATPS4rpp, CELBpts, CHTBSptspp, DHAPT, FRUpts2pp, FRUptspp, GALTptspp, GAMptspp, GLCptspp, MALTptspp, MANGLYCptspp, MANptspp, MNLptspp, SBTptspp, SUCptspp, TREptspp
9917	-49.5361	EX_succ_e	10.8056	-10	0.0694611	4	30.0575	-13.0428	25.8624	-3.81046	8.00562	b2415, b3732, b0972, b2987	2DGLCptspp, ACGAptspp, ACMANAptspp, ACMUMptspp, ARBTptspp, ASCBptspp, ATPS4rpp, CELBpts, CHTBSptspp, DHAPT, FRUpts2pp, FRUptspp, GALTptspp, GAMptspp, GLCptspp, MALTptspp, MANGLYCptspp, MANptspp, MNLptspp, SBTptspp, SUCptspp, TREptspp
9918	-49.5361	EX_succ_e	10.8056	-10	0.0694611	4	30.0575	-13.0428	25.8624	-3.81046	8.00562	b3951, b2415, b3732, b3878	2DGLCptspp, ACGAptspp, ACMANAptspp, ACMUMptspp, ARBTptspp, ASCBptspp, ATPS4rpp, CELBpts, CHTBSptspp, DHAPT, FRUpts2pp, FRUptspp, GALTptspp, GAMptspp, GLCptspp, MALTptspp, MANGLYCptspp, MANptspp, MNLptspp, SBTptspp, SQGH, SUCptspp, TREptspp
9919	-49.5361	EX_succ_e	10.8056	-10	0.0694611	4	30.0575	-13.0428	25.8624	-3.81046	8.00562	b2415, b3137, b3732, b1865	2DGLCptspp, ACGAptspp, ACMANAptspp, ACMUMptspp, ARBTptspp, ASCBptspp, ATPS4rpp, CELBpts, CHTBSptspp, DHAPT, FRUpts2pp, FRUptspp, GALTptspp, GAMptspp, GLCptspp, MALTptspp, MANGLYCptspp, MANptspp, MNLptspp, SBTptspp, SUCptspp, TREptspp
9920	-49.5361	EX_succ_e	10.8056	-10	0.0694611	4	30.0575	-13.0428	25.8624	-3.81046	8.00562	b0073, b2415, b3732, b3503	2DGLCptspp, ACGAptspp, ACMANAptspp, ACMUMptspp, ARBTptspp, ASCBptspp, ASR, ATPS4rpp, CELBpts, CHTBSptspp, DHAPT, FRUpts2pp, FRUptspp, GALTptspp, GAMptspp, GLCptspp, MALTptspp, MANGLYCptspp, MANptspp, MNLptspp, SBTptspp, SUCptspp, TREptspp
9921	-49.5361	EX_succ_e	10.8056	-10	0.0694611	4	30.0575	-13.0428	25.8624	-3.81046	8.00562	b2415, b3917, b3736, b2895	2DGLCptspp, ACGAptspp, ACMANAptspp, ACMUMptspp, ARBTptspp, ASCBptspp, ATPS4rpp, CELBpts, CHTBSptspp, DHAPT, FRUpts2pp, FRUptspp, GALTptspp, GAMptspp, GLCptspp, MALTptspp, MANGLYCptspp, MANptspp, MNLptspp, SBTptspp, SUCptspp, TREptspp
9922	-49.5361	EX_succ_e	10.8056	-10	0.0694611	4	30.0575	-13.0428	25.8624	-3.81046	8.00562	b2431, b2415, b3738, b0973	2DGLCptspp, ACGAptspp, ACMANAptspp, ACMUMptspp, ARBTptspp, ASCBptspp, ATPS4rpp, CELBpts, CHTBSptspp, DHAPT, FRUpts2pp, FRUptspp, GALTptspp, GAMptspp, GLCptspp, MALTptspp, MANGLYCptspp, MANptspp, MNLptspp, SBTptspp, SUCptspp, TREptspp
9923	-49.5361	EX_succ_e	10.8056	-10	0.0694611	4	30.0575	-13.0428	25.8624	-3.81046	8.00562	b2415, b2817, b3736, b3876	2DGLCptspp, ACGAptspp, ACMANAptspp, ACMUMptspp, ARBTptspp, ASCBptspp, ATPS4rpp, CELBpts, CHTBSptspp, DHAPT, FRUpts2pp, FRUptspp, GALTptspp, GAMptspp, GLCptspp, MALTptspp, MANGLYCptspp, MANptspp, MNLptspp, SBTptspp, SQtr, SUCptspp, TREptspp
9924	-49.5361	EX_succ_e	10.8056	-10	0.0694611	4	30.0575	-13.0428	25.8624	-3.81046	8.00562	b3885, b2415, b3732, b3370	2DGLCptspp, ACGAptspp, ACMANAptspp, ACMUMptspp, ARBTptspp, ASCBptspp, ATPS4rpp, CELBpts, CHTBSptspp, DHAPT, FRULYSt2pp, FRUpts2pp, FRUptspp, GALTptspp, GAMptspp, GLCptspp, MALTptspp, MANGLYCptspp, MANptspp, MNLptspp, PSCLYSt2pp, SBTptspp, SUCptspp, TREptspp
9925	-49.5361	EX_succ_e	10.8056	-10	0.0694611	4	30.0575	-13.0428	25.8624	-3.81046	8.00562	b2415, b3732, b1440, b0613	2DGLCptspp, ACGAptspp, ACMANAptspp, ACMUMptspp, ARBTptspp, ASCBptspp, ATPS4rpp, CELBpts, CHTBSptspp, DHAPT, FRUpts2pp, FRUptspp, GALTptspp, GAMptspp, GLCptspp, MALTptspp, MANGLYCptspp, MANptspp, MNLptspp, SBTptspp, SUCptspp, TPRDCOAS, TREptspp
9926	-49.5361	EX_succ_e	10.8056	-10	0.0694611	4	30.0575	-13.0428	25.8624	-3.81046	8.00562	b2415, b3137, b2435, b3732	2DGLCptspp, ACGAptspp, ACMANAptspp, ACMUMptspp, ARBTptspp, ASCBptspp, ATPS4rpp, CELBpts, CHTBSptspp, DHAPT, FRUpts2pp, FRUptspp, GALTptspp, GAMptspp, GLCptspp, MALTptspp, MANGLYCptspp, MANptspp, MNLptspp, SBTptspp, SUCptspp, TREptspp
9927	-49.5361	EX_succ_e	10.8056	-10	0.0694611	4	30.0575	-13.0428	25.8624	-3.81046	8.00562	b2415, b4219, b3732, b1476	2DGLCptspp, ACGAptspp, ACMANAptspp, ACMUMptspp, ARBTptspp, ASCBptspp, ATPS4rpp, CELBpts, CHTBSptspp, DHAPT, FRUpts2pp, FRUptspp, GALTptspp, GAMptspp, GLCptspp, MALTptspp, MANGLYCptspp, MANptspp, MNLptspp, SBTptspp, SUCptspp, TREptspp
9928	-49.5361	EX_succ_e	10.8056	-10	0.0694611	4	30.0575	-13.0428	25.8624	-3.81046	8.00562	b3223, b2415, b3744, b3738	2DGLCptspp, ACGAptspp, ACMANAptspp, ACMUMptspp, AMANAPEr, ARBTptspp, ASCBptspp, ATPS4rpp, CELBpts, CHTBSptspp, DHAPT, FRUpts2pp, FRUptspp, GALTptspp, GAMptspp, GLCptspp, MALTptspp, MANGLYCptspp, MANptspp, MNLptspp, SBTptspp, SUCptspp, TREptspp
9929	-49.5361	EX_succ_e	10.8056	-10	0.0694611	4	30.0575	-13.0428	25.8624	-3.81046	8.00562	b2415, b3578, b3736, b4478	23DOGULNt4pp, 2DGLCptspp, ACGAptspp, ACMANAptspp, ACMUMptspp, ARBTptspp, ASCBptspp, ATPS4rpp, CELBpts, CHTBSptspp, DHAPT, FRUpts2pp, FRUptspp, GALCTND, GALTptspp, GAMptspp, GLCptspp, MALTptspp, MANGLYCptspp, MANptspp, MNLptspp, SBTptspp, SUCptspp, TREptspp, XYLUt2pp
9930	-49.5361	EX_succ_e	10.8056	-10	0.0694611	4	30.0575	-13.0428	25.8624	-3.81046	8.00562	b3057, b2579, b2415, b3732	2DGLCptspp, ACGAptspp, ACMANAptspp, ACMUMptspp, ARBTptspp, ASCBptspp, ATPS4rpp, CELBpts, CHTBSptspp, DHAPT, FRUpts2pp, FRUptspp, GALTptspp, GAMptspp, GLCptspp, MALTptspp, MANGLYCptspp, MANptspp, MNLptspp, SBTptspp, SUCptspp, TREptspp
9931	-49.5361	EX_succ_e	10.8056	-10	0.0694611	4	30.0575	-13.0428	25.8624	-3.81046	8.00562	b2415, b2179, b3738, b3877	2DGLCptspp, ACGAptspp, ACMANAptspp, ACMUMptspp, ARBTptspp, ASCBptspp, ATPS4rpp, CELBpts, CHTBSptspp, DHAPT, DHPStr, FRUpts2pp, FRUptspp, GALTptspp, GAMptspp, GLCptspp, MALTptspp, MANGLYCptspp, MANptspp, MNLptspp, SBTptspp, SUCptspp, TREptspp
9932	-49.5361	EX_succ_e	10.8056	-10	0.0694611	4	30.0575	-13.0428	25.8624	-3.81046	8.00562	b2415, b2486, b3736, b3125	2DGLCptspp, ACGAptspp, ACMANAptspp, ACMUMptspp, ARBTptspp, ASCBptspp, ATPS4rpp, CELBpts, CHTBSptspp, DHAPT, FRUpts2pp, FRUptspp, GALTptspp, GAMptspp, GLCptspp, MALTptspp, MANGLYCptspp, MANptspp, MNLptspp, SBTptspp, SUCptspp, TREptspp
9933	-49.5361	EX_succ_e	10.8056	-10	0.0694611	4	30.0575	-13.0428	25.8624	-3.81046	8.00562	b2415, b3397, b3738, b1487	2DGLCptspp, ACGAptspp, ACMANAptspp, ACMUMptspp, ARBTptspp, ASCBptspp, ATPS4rpp, CELBpts, CHTBSptspp, DHAPT, FRUpts2pp, FRUptspp, GALTptspp, GAMptspp, GLCptspp, MALTptspp, MANGLYCptspp, MANptspp, MNLptspp, SBTptspp, SUCptspp, TREptspp
9934	-49.5361	EX_succ_e	10.8056	-10	0.0694611	4	30.0575	-13.0428	25.8624	-3.81046	8.00562	b2781, b2415, b3736, b2578	2DGLCptspp, ACGAptspp, ACMANAptspp, ACMUMptspp, ARBTptspp, ASCBptspp, ATPS4rpp, CELBpts, CHTBSptspp, DHAPT, FRUpts2pp, FRUptspp, GALTptspp, GAMptspp, GLCptspp, MALTptspp, MANGLYCptspp, MANptspp, MNLptspp, SBTptspp, SUCptspp, TREptspp
9935	-49.5361	EX_succ_e	10.8056	-10	0.0694611	4	30.0575	-13.0428	25.8624	-3.81046	8.00562	b2582, b2415, b3738, b4032	14GLUCANabcpp, 2DGLCptspp, ACGAptspp, ACMANAptspp, ACMUMptspp, ARBTptspp, ASCBptspp, ATPS4rpp, CELBpts, CHTBSptspp, DHAPT, FRUpts2pp, FRUptspp, GALTptspp, GAMptspp, GLCptspp, MALTHXabcpp, MALTPTabcpp, MALTTRabcpp, MALTTTRabcpp, MALTabcpp, MALTptspp, MANGLYCptspp, MANptspp, MNLptspp, SBTptspp, SUCptspp, TREptspp
9936	-49.5361	EX_succ_e	10.8056	-10	0.0694611	4	30.0575	-13.0428	25.8624	-3.81046	8.00562	b2415, b4477, b3736, b2765	2DGLCptspp, ACGAptspp, ACMANAptspp, ACMUMptspp, ARBTptspp, ASCBptspp, ATPS4rpp, CELBpts, CHTBSptspp, CPH4S, DDPGALA, DHAPT, FRUpts2pp, FRUptspp, GALTptspp, GAMptspp, GLCptspp, MALTptspp, MANGLYCptspp, MANptspp, MNLptspp, SBTptspp, SUCptspp, TREptspp
9937	-49.5361	EX_succ_e	10.8056	-10	0.0694611	4	30.0575	-13.0428	25.8624	-3.81046	8.00562	b2162, b2415, b3732, b0070	2DGLCptspp, ACGAptspp, ACMANAptspp, ACMUMptspp, ARBTptspp, ASCBptspp, ATPS4rpp, CELBpts, CHTBSptspp, DHAPT, FRUpts2pp, FRUptspp, GALTptspp, GAMptspp, GLCptspp, MALTptspp, MANGLYCptspp, MANptspp, MNLptspp, SBTptspp, SUCptspp, TREptspp
9938	-49.5361	EX_succ_e	10.8056	-10	0.0694611	4	30.0575	-13.0428	25.8624	-3.81046	8.00562	b2415, b3224, b3736, b3603	2DGLCptspp, ACGAptspp, ACMANAptspp, ACMUMptspp, ACNAMt2pp, ARBTptspp, ASCBptspp, ATPS4rpp, CELBpts, CHTBSptspp, DHAPT, FRUpts2pp, FRUptspp, GALTptspp, GAMptspp, GLCptspp, MALTptspp, MANGLYCptspp, MANptspp, MNLptspp, SBTptspp, SUCptspp, TREptspp
9939	-49.5361	EX_succ_e	10.8056	-10	0.0694611	4	30.0575	-13.0428	25.8624	-3.81046	8.00562	b2415, b3736, b3503, b0839	2DGLCptspp, ACGAptspp, ACMANAptspp, ACMUMptspp, ARBTptspp, ASCBptspp, ASR, ATPS4rpp, CELBpts, CHTBSptspp, DHAPT, FRUpts2pp, FRUptspp, GALTptspp, GAMptspp, GLCptspp, MALTptspp, MANGLYCptspp, MANptspp, MNLptspp, SBTptspp, SUCptspp, TREptspp
9940	-49.5361	EX_succ_e	10.8056	-10	0.0694611	4	30.0575	-13.0428	25.8624	-3.81046	8.00562	b2415, b3736, b3493, b4159	2DGLCptspp, ACGAptspp, ACMANAptspp, ACMUMptspp, ARBTptspp, ASCBptspp, ATPS4rpp, CELBpts, CHTBSptspp, DHAPT, FRUpts2pp, FRUptspp, GALTptspp, GAMptspp, GLCptspp, MALTptspp, MANGLYCptspp, MANptspp, MNLptspp, SBTptspp, SUCptspp, TREptspp
9941	-49.5361	EX_succ_e	10.8056	-10	0.0694611	4	30.0575	-13.0428	25.8624	-3.81046	8.00562	b2415, b3738, b1798, b1400	2DGLCptspp, 2HPTCOAT, ACGAptspp, ACMANAptspp, ACMUMptspp, ARBTptspp, ASCBptspp, ATPS4rpp, CELBpts, CHTBSptspp, DHAPT, FRUpts2pp, FRUptspp, GALTptspp, GAMptspp, GLCptspp, MALTptspp, MANGLYCptspp, MANptspp, MNLptspp, SBTptspp, SUCptspp, TREptspp
9942	-49.5361	EX_succ_e	10.8056	-10	0.0694611	4	30.0575	-13.0428	25.8624	-3.81046	8.00562	b2415, b2871, b3736, b2146	2DGLCptspp, ACGAptspp, ACMANAptspp, ACMUMptspp, ARBTptspp, ASCBptspp, ATPS4rpp, CELBpts, CHTBSptspp, DAPAL, DHAPT, DURADx, FRUpts2pp, FRUptspp, GALTptspp, GAMptspp, GLCptspp, MALTptspp, MANGLYCptspp, MANptspp, MNLptspp, SBTptspp, SUCptspp, TREptspp
9943	-49.5361	EX_succ_e	10.8056	-10	0.0694611	4	30.0575	-13.0428	25.8624	-3.81046	8.00562	b2415, b3738, b3371, b0308	2DGLCptspp, ACGAptspp, ACMANAptspp, ACMUMptspp, ARBTptspp, ASCBptspp, ATPS4rpp, CELBpts, CHTBSptspp, DHAPT, FRULYSDG, FRUpts2pp, FRUptspp, GALTptspp, GAMptspp, GLCptspp, MALTptspp, MANGLYCptspp, MANptspp, MNLptspp, SBTptspp, SUCptspp, TREptspp
9944	-49.5361	EX_succ_e	10.8056	-10	0.0694611	4	30.0575	-13.0428	25.8624	-3.81046	8.00562	b2415, b2417, b3736, b1781	2DGLCptspp, ACGAptspp, ACMANAptspp, ACMUMptspp, ARBTptspp, ASCBptspp, ATPS4rpp, CELBpts, CHTBSptspp, DHAPT, FRUpts2pp, FRUptspp, GALTptspp, GAMptspp, GLCptspp, MALTptspp, MANGLYCptspp, MANptspp, MNLptspp, SBTptspp, SUCptspp, TREptspp
9945	-49.5361	EX_succ_e	10.8056	-10	0.0694611	4	30.0575	-13.0428	25.8624	-3.81046	8.00562	b2415, b0754, b3732, b4033	14GLUCANabcpp, 2DGLCptspp, ACGAptspp, ACMANAptspp, ACMUMptspp, ARBTptspp, ASCBptspp, ATPS4rpp, CELBpts, CHTBSptspp, DHAPT, FRUpts2pp, FRUptspp, GALTptspp, GAMptspp, GLCptspp, MALTHXabcpp, MALTPTabcpp, MALTTRabcpp, MALTTTRabcpp, MALTabcpp, MALTptspp, MANGLYCptspp, MANptspp, MNLptspp, SBTptspp, SUCptspp, TREptspp
9946	-49.5361	EX_succ_e	10.8056	-10	0.0694611	4	30.0575	-13.0428	25.8624	-3.81046	8.00562	b2415, b1704, b3738, b4297	2DGLCptspp, ACGAptspp, ACMANAptspp, ACMUMptspp, ARBTptspp, ASCBptspp, ATPS4rpp, CELBpts, CHTBSptspp, DHAPT, FRUpts2pp, FRUptspp, GALTptspp, GAMptspp, GLCptspp, MALTptspp, MANGLYCptspp, MANptspp, MNLptspp, SBTptspp, SUCptspp, TREptspp
9947	-49.5361	EX_succ_e	10.8056	-10	0.0694611	4	30.0575	-13.0428	25.8624	-3.81046	8.00562	b2415, b3732, b4019, b2166	2DGLCptspp, ACGAptspp, ACMANAptspp, ACMUMptspp, ARBTptspp, ASCBptspp, ATPS4rpp, CELBpts, CHTBSptspp, DHAPT, FRUpts2pp, FRUptspp, GALTptspp, GAMptspp, GLCptspp, MALTptspp, MANGLYCptspp, MANptspp, MNLptspp, PSURIK, SBTptspp, SUCptspp, TREptspp
9948	-49.5361	EX_succ_e	10.8056	-10	0.0694611	4	30.0575	-13.0428	25.8624	-3.81046	8.00562	b2415, b2800, b3736, b0856	2DGLCptspp, ACGAptspp, ACMANAptspp, ACMUMptspp, ARBTptspp, ASCBptspp, ATPS4rpp, CELBpts, CHTBSptspp, DHAPT, FRUpts2pp, FRUptspp, GALTptspp, GAMptspp, GLCptspp, MALTptspp, MANGLYCptspp, MANptspp, MNLptspp, SBTptspp, SUCptspp, TREptspp
9949	-49.5361	EX_succ_e	10.8056	-10	0.0694611	4	30.0575	-13.0428	25.8624	-3.81046	8.00562	b2415, b2028, b3736, b3370	2DGLCptspp, ACGAptspp, ACMANAptspp, ACMUMptspp, ARBTptspp, ASCBptspp, ATPS4rpp, CELBpts, CHTBSptspp, DHAPT, FRULYSt2pp, FRUpts2pp, FRUptspp, GALTptspp, GAMptspp, GLCptspp, MALTptspp, MANGLYCptspp, MANptspp, MNLptspp, PSCLYSt2pp, SBTptspp, SUCptspp, TREptspp, UDPGD
9950	-49.5361	EX_succ_e	10.8056	-10	0.0694611	4	30.0575	-13.0428	25.8624	-3.81046	8.00562	b2415, b0849, b1246, b3732	2DGLCptspp, ACGAptspp, ACMANAptspp, ACMUMptspp, ARBTptspp, ASCBptspp, ATPS4rpp, CELBpts, CHTBSptspp, DHAPT, FRUpts2pp, FRUptspp, GALTptspp, GAMptspp, GLCptspp, MALTptspp, MANGLYCptspp, MANptspp, MNLptspp, SBTptspp, SUCptspp, TREptspp
9951	-49.5361	EX_succ_e	10.8056	-10	0.0694611	4	30.0575	-13.0428	25.8624	-3.81046	8.00562	b2415, b0828, b2720, b3736	2DGLCptspp, ACGAptspp, ACMANAptspp, ACMUMptspp, ARBTptspp, ASCBptspp, ATPS4rpp, CELBpts, CHTBSptspp, DHAPT, FRUpts2pp, FRUptspp, GALTptspp, GAMptspp, GLCptspp, MALTptspp, MANGLYCptspp, MANptspp, MNLptspp, SBTptspp, SUCptspp, TREptspp
9952	-49.5361	EX_succ_e	10.8056	-10	0.0694611	4	30.0575	-13.0428	25.8624	-3.81046	8.00562	b2415, b2485, b3732, b1476	2DGLCptspp, ACGAptspp, ACMANAptspp, ACMUMptspp, ARBTptspp, ASCBptspp, ATPS4rpp, CELBpts, CHTBSptspp, DHAPT, FRUpts2pp, FRUptspp, GALTptspp, GAMptspp, GLCptspp, MALTptspp, MANGLYCptspp, MANptspp, MNLptspp, SBTptspp, SUCptspp, TREptspp
9953	-49.5361	EX_succ_e	10.8056	-10	0.0694611	4	30.0575	-13.0428	25.8624	-3.81046	8.00562	b2415, b2724, b3736, b3599	2DGLCptspp, ACGAptspp, ACMANAptspp, ACMUMptspp, ARBTptspp, ASCBptspp, ATPS4rpp, CELBpts, CHTBSptspp, DHAPT, FRUpts2pp, FRUptspp, GALTptspp, GAMptspp, GLCptspp, MALTptspp, MANGLYCptspp, MANptspp, MNLptspp, SBTptspp, SUCptspp, TREptspp
9954	-49.5361	EX_succ_e	10.8056	-10	0.0694611	4	30.0575	-13.0428	25.8624	-3.81046	8.00562	b2415, b3732, b1002, b2047	2DGLCptspp, ACGAptspp, ACMANAptspp, ACMUMptspp, ARBTptspp, ASCBptspp, ATPS4rpp, CELBpts, CHTBSptspp, DHAPT, FRUpts2pp, FRUptspp, GAL1PPpp, GALTptspp, GAMptspp, GLCptspp, MALTptspp, MANGLYCptspp, MANptspp, MNLptspp, SBTptspp, SUCptspp, TREptspp, UDPGPT
9955	-49.5361	EX_succ_e	10.8056	-10	0.0694611	4	30.0575	-13.0428	25.8624	-3.81046	8.00562	b2431, b2415, b3738, b4099	2DGLCptspp, ACGAptspp, ACMANAptspp, ACMUMptspp, ARBTptspp, ARMEPNS, ASCBptspp, ATPS4rpp, CELBpts, CHTBSptspp, DHAPT, FRUpts2pp, FRUptspp, GALTptspp, GAMptspp, GLCptspp, MALTptspp, MANGLYCptspp, MANptspp, MNLptspp, SBTptspp, SUCptspp, TREptspp
9956	-49.5361	EX_succ_e	10.8056	-10	0.0694611	4	30.0575	-13.0428	25.8624	-3.81046	8.00562	b2415, b0675, b1468, b3736	2DGLCptspp, ACGAptspp, ACMANAptspp, ACMUMptspp, ARBTptspp, ASCBptspp, ATPS4rpp, CELBpts, CHTBSptspp, DHAPT, FRUpts2pp, FRUptspp, GALTptspp, GAMptspp, GLCptspp, MALTptspp, MANGLYCptspp, MANptspp, MNLptspp, SBTptspp, SUCptspp, TREptspp
9957	-49.5361	EX_succ_e	10.8056	-10	0.0694611	4	30.0575	-13.0428	25.8624	-3.81046	8.00562	b2415, b0822, b3732, b2344	2DGLCptspp, ACGAptspp, ACMANAptspp, ACMUMptspp, ARBTptspp, ASCBptspp, ATPS4rpp, CELBpts, CHTBSptspp, DDCAtexi, DHAPT, FRUpts2pp, FRUptspp, GALTptspp, GAMptspp, GLCptspp, HDCAtexi, HDCEAtexi, MALTptspp, MANGLYCptspp, MANptspp, MNLptspp, OCDCAtexi, OCDCEAtexi, SBTptspp, SUCptspp, TREptspp, TTDCAtexi, TTDCEAtexi
9958	-49.5361	EX_succ_e	10.8056	-10	0.0694611	4	30.0575	-13.0428	25.8624	-3.81046	8.00562	b3942, b2415, b3738, b1490	2DGLCptspp, ACGAptspp, ACMANAptspp, ACMUMptspp, ARBTptspp, ASCBptspp, ATPS4rpp, CELBpts, CHTBSptspp, DHAPT, FRUpts2pp, FRUptspp, GALTptspp, GAMptspp, GLCptspp, MALTptspp, MANGLYCptspp, MANptspp, MNLptspp, SBTptspp, SUCptspp, TREptspp
9959	-49.5361	EX_succ_e	10.8056	-10	0.0694611	4	30.0575	-13.0428	25.8624	-3.81046	8.00562	b2415, b2738, b3736, b4513	2DGLCptspp, ACGAptspp, ACMANAptspp, ACMUMptspp, ARBTptspp, ASCBptspp, ATPS4rpp, CELBpts, CHTBSptspp, DHAPT, FRUpts2pp, FRUptspp, GALTptspp, GAMptspp, GLCptspp, MALTptspp, MANGLYCptspp, MANptspp, MNLptspp, SBTptspp, SUCptspp, TREptspp
9960	-49.5361	EX_succ_e	10.8056	-10	0.0694611	4	30.0575	-13.0428	25.8624	-3.81046	8.00562	b3885, b2415, b3736, b3880	2DGLCptspp, ACGAptspp, ACMANAptspp, ACMUMptspp, ARBTptspp, ASCBptspp, ATPS4rpp, CELBpts, CHTBSptspp, DHAPT, FRUpts2pp, FRUptspp, GALTptspp, GAMptspp, GLCptspp, MALTptspp, MANGLYCptspp, MANptspp, MNLptspp, SBTptspp, SQVOSI, SUCptspp, TREptspp
9961	-49.5361	EX_succ_e	10.8056	-10	0.0694611	4	30.0575	-13.0428	25.8624	-3.81046	8.00562	b2415, b2215, b3732, b4104	2DGLCptspp, ACGAptspp, ACMANAptspp, ACMUMptspp, ARBTptspp, ASCBptspp, ATPS4rpp, CELBpts, CHTBSptspp, DHAPT, FRUpts2pp, FRUptspp, GALTptspp, GAMptspp, GLCptspp, MALTptspp, MANGLYCptspp, MANptspp, MEPNabcpp, MNLptspp, SBTptspp, SUCptspp, TREptspp
9962	-49.5361	EX_succ_e	10.8056	-10	0.0694611	4	30.0575	-13.0428	25.8624	-3.81046	8.00562	b2415, b1819, b2719, b3732	2DGLCptspp, ACGAptspp, ACMANAptspp, ACMUMptspp, ARBTptspp, ASCBptspp, ATPS4rpp, CELBpts, CHTBSptspp, DHAPT, FRUpts2pp, FRUptspp, GALTptspp, GAMptspp, GLCptspp, MALTptspp, MANGLYCptspp, MANptspp, MNLptspp, SBTptspp, SUCptspp, TREptspp
9963	-49.5361	EX_succ_e	10.8056	-10	0.0694611	4	30.0575	-13.0428	25.8624	-3.81046	8.00562	b2415, b2539, b3732, b2765	2DGLCptspp, ACGAptspp, ACMANAptspp, ACMUMptspp, ARBTptspp, ASCBptspp, ATPS4rpp, CELBpts, CHTBSptspp, CINNDO, CPH4S, DHAPT, FRUpts2pp, FRUptspp, GALTptspp, GAMptspp, GLCptspp, MALTptspp, MANGLYCptspp, MANptspp, MNLptspp, PPPNDO, SBTptspp, SUCptspp, TREptspp
9964	-49.5361	EX_succ_e	10.8056	-10	0.0694611	4	30.0575	-13.0428	25.8624	-3.81046	8.00562	b2415, b2425, b3736, b0632	2DGLCptspp, ACGAptspp, ACMANAptspp, ACMUMptspp, ARBTptspp, ASCBptspp, ATPS4rpp, CELBpts, CHTBSptspp, DHAPT, FRUpts2pp, FRUptspp, GALTptspp, GAMptspp, GLCptspp, MALTptspp, MANGLYCptspp, MANptspp, MNLptspp, SBTptspp, SUCptspp, TREptspp
9965	-49.5361	EX_succ_e	10.8056	-10	0.0694611	4	30.0575	-13.0428	25.8624	-3.81046	8.00562	b1759, b2415, b3736, b1535	2DGLCptspp, ACGAptspp, ACMANAptspp, ACMUMptspp, ARBTptspp, ASCBptspp, ATPS4rpp, CELBpts, CHTBSptspp, DHAPT, FRUpts2pp, FRUptspp, GALTptspp, GAMptspp, GLCptspp, MALTptspp, MANGLYCptspp, MANptspp, MNLptspp, SBTptspp, SUCptspp, TREptspp
9966	-49.5361	EX_succ_e	10.8056	-10	0.0694611	4	30.0575	-13.0428	25.8624	-3.81046	8.00562	b2415, b3736, b0092, b1185	2DGLCptspp, ACGAptspp, ACMANAptspp, ACMUMptspp, ARBTptspp, ASCBptspp, ATPS4rpp, CELBpts, CHTBSptspp, DHAPT, DSBAO1, DSBAO2, FRUpts2pp, FRUptspp, GALTptspp, GAMptspp, GLCptspp, MALTptspp, MANGLYCptspp, MANptspp, MNLptspp, SBTptspp, SUCptspp, TREptspp
9967	-49.5361	EX_succ_e	10.8056	-10	0.0694611	4	30.0575	-13.0428	25.8624	-3.81046	8.00562	b1190, b2415, b3732, b2794	2DGLCptspp, ACGAptspp, ACMANAptspp, ACMUMptspp, ARBTptspp, ASCBptspp, ATPS4rpp, CDGR, CELBpts, CHTBSptspp, DHAPT, FRUpts2pp, FRUptspp, GALTptspp, GAMptspp, GLCptspp, MALTptspp, MANGLYCptspp, MANptspp, MNLptspp, SBTptspp, SUCptspp, TREptspp
9968	-49.5361	EX_succ_e	10.8056	-10	0.0694611	4	30.0575	-13.0428	25.8624	-3.81046	8.00562	b1241, b2415, b2483, b3732	2DGLCptspp, ACGAptspp, ACMANAptspp, ACMUMptspp, ARBTptspp, ASCBptspp, ATPS4rpp, CELBpts, CHTBSptspp, DHAPT, FRUpts2pp, FRUptspp, GALTptspp, GAMptspp, GLCptspp, MALTptspp, MANGLYCptspp, MANptspp, MNLptspp, SBTptspp, SUCptspp, TREptspp
9969	-49.5361	EX_succ_e	10.8056	-10	0.0694611	4	30.0575	-13.0428	25.8624	-3.81046	8.00562	b2579, b2415, b3732, b3734	2DGLCptspp, ACGAptspp, ACMANAptspp, ACMUMptspp, ARBTptspp, ASCBptspp, ATPS4rpp, CELBpts, CHTBSptspp, DHAPT, FRUpts2pp, FRUptspp, GALTptspp, GAMptspp, GLCptspp, MALTptspp, MANGLYCptspp, MANptspp, MNLptspp, SBTptspp, SUCptspp, TREptspp
9970	-49.5361	EX_succ_e	10.8056	-10	0.0694611	4	30.0575	-13.0428	25.8624	-3.81046	8.00562	b1694, b2415, b1101, b3732	2DGLCptspp, ACGAptspp, ACMANAptspp, ACMUMptspp, ARBTptspp, ASCBptspp, ATPS4rpp, CELBpts, CHTBSptspp, DHAPT, FRUpts2pp, FRUptspp, GALTptspp, GAMptspp, GLCptspp, MALTptspp, MANGLYCptspp, MANptspp, MNLptspp, SBTptspp, SUCptspp, TREptspp
9971	-49.5361	EX_succ_e	10.8056	-10	0.0694611	4	30.0575	-13.0428	25.8624	-3.81046	8.00562	b0844, b2415, b3732, b0092	2DGLCptspp, ACGAptspp, ACMANAptspp, ACMUMptspp, ARBTptspp, ASCBptspp, ATPS4rpp, CELBpts, CHTBSptspp, DHAPT, FRUpts2pp, FRUptspp, GALTptspp, GAMptspp, GLCptspp, MALTptspp, MANGLYCptspp, MANptspp, MNLptspp, SBTptspp, SUCptspp, TREptspp
9972	-49.5361	EX_succ_e	10.8056	-10	0.0694611	4	30.0575	-13.0428	25.8624	-3.81046	8.00562	b2415, b2724, b3732, b1103	2DGLCptspp, ACGAptspp, ACMANAptspp, ACMUMptspp, ARBTptspp, ASCBptspp, ATPS4rpp, CELBpts, CHTBSptspp, DHAPT, FRUpts2pp, FRUptspp, GALTptspp, GAMptspp, GLCptspp, MALTptspp, MANGLYCptspp, MANptspp, MNLptspp, PNSPA, SBTptspp, SUCptspp, TREptspp
9973	-49.5361	EX_succ_e	10.8056	-10	0.0694611	4	30.0575	-13.0428	25.8624	-3.81046	8.00562	b1478, b2415, b1244, b3736	2DGLCptspp, ACGAptspp, ACMANAptspp, ACMUMptspp, ARBTptspp, ASCBptspp, ATPS4rpp, CELBpts, CHTBSptspp, DHAPT, FRUpts2pp, FRUptspp, GALTptspp, GAMptspp, GLCptspp, MALTptspp, MANGLYCptspp, MANptspp, MNLptspp, SBTptspp, SUCptspp, TREptspp
9974	-49.5361	EX_succ_e	10.8056	-10	0.0694611	4	30.0575	-13.0428	25.8624	-3.81046	8.00562	b2415, b2788, b3736, b4544	2DGLCptspp, ACGAptspp, ACMANAptspp, ACMUMptspp, ARBTptspp, ASCBptspp, ATPS4rpp, CELBpts, CHTBSptspp, DHAPT, FRUpts2pp, FRUptspp, GALTptspp, GAMptspp, GLCptspp, MALTptspp, MANGLYCptspp, MANptspp, MNLptspp, SBTptspp, SUCptspp, TREptspp, ULA4Ntppi
9975	-49.5361	EX_succ_e	10.8056	-10	0.0694611	4	30.0575	-13.0428	25.8624	-3.81046	8.00562	b1004, b2415, b4198, b3738	2DGLCptspp, ACGAptspp, ACMANAptspp, ACMUMptspp, ARBTptspp, ASCBptspp, ATPS4rpp, CELBpts, CHTBSptspp, DHAPT, FRUpts2pp, FRUptspp, GALTptspp, GAMptspp, GLCptspp, MALTptspp, MANGLYCptspp, MANptspp, MNLptspp, SBTptspp, SUCptspp, TREptspp
9976	-49.5361	EX_succ_e	10.8056	-10	0.0694611	4	30.0575	-13.0428	25.8624	-3.81046	8.00562	b2415, b3736, b1781, b3001	2DGLCptspp, ACGAptspp, ACMANAptspp, ACMUMptspp, ARBTptspp, ASCBptspp, ATPS4rpp, CELBpts, CHTBSptspp, DHAPT, FRUpts2pp, FRUptspp, GALTptspp, GAMptspp, GLCptspp, MALTptspp, MANGLYCptspp, MANptspp, MNLptspp, SBTptspp, SUCptspp, TREptspp
9977	-49.5361	EX_succ_e	10.8056	-10	0.0694611	4	30.0575	-13.0428	25.8624	-3.81046	8.00562	b2415, b3732, b1443, b0355	2DGLCptspp, ACGAptspp, ACMANAptspp, ACMUMptspp, ARBTptspp, ASCBptspp, ATPS4rpp, CELBpts, CHTBSptspp, DHAPT, FRUpts2pp, FRUptspp, GALTptspp, GAMptspp, GLCptspp, MALTptspp, MANGLYCptspp, MANptspp, MNLptspp, SBTptspp, SUCptspp, TREptspp
9978	-49.5361	EX_succ_e	10.8056	-10	0.0694611	4	30.0575	-13.0428	25.8624	-3.81046	8.00562	b2415, b3738, b4033, b3493	14GLUCANabcpp, 2DGLCptspp, ACGAptspp, ACMANAptspp, ACMUMptspp, ARBTptspp, ASCBptspp, ATPS4rpp, CELBpts, CHTBSptspp, DHAPT, FRUpts2pp, FRUptspp, GALTptspp, GAMptspp, GLCptspp, MALTHXabcpp, MALTPTabcpp, MALTTRabcpp, MALTTTRabcpp, MALTabcpp, MALTptspp, MANGLYCptspp, MANptspp, MNLptspp, SBTptspp, SUCptspp, TREptspp
9979	-49.5361	EX_succ_e	10.8056	-10	0.0694611	4	30.0575	-13.0428	25.8624	-3.81046	8.00562	b0903, b2415, b2523, b3736	2DGLCptspp, ACGAptspp, ACMANAptspp, ACMUMptspp, ARBTptspp, ASCBptspp, ATPS4rpp, CELBpts, CHTBSptspp, DHAPT, FRUpts2pp, FRUptspp, GALTptspp, GAMptspp, GLCptspp, MALTptspp, MANGLYCptspp, MANptspp, MNLptspp, SBTptspp, SUCptspp, TREptspp
9980	-49.5361	EX_succ_e	10.8056	-10	0.0694611	4	30.0575	-13.0428	25.8624	-3.81046	8.00562	b2415, b3732, b1484, b3656	2DGLCptspp, ACGAptspp, ACMANAptspp, ACMUMptspp, ARBTptspp, ASCBptspp, ATPS4rpp, CELBpts, CHTBSptspp, DHAPT, FRUpts2pp, FRUptspp, GALTptspp, GAMptspp, GLCptspp, MALTptspp, MANGLYCptspp, MANptspp, MNLptspp, SBTptspp, SUCptspp, TREptspp, XYHDL
9981	-49.5361	EX_succ_e	10.8056	-10	0.0694611	4	30.0575	-13.0428	25.8624	-3.81046	8.00562	b2415, b3732, b3664, b4093	2DGLCptspp, ACGAptspp, ACMANAptspp, ACMUMptspp, AMPNTAT, ARBTptspp, ASCBptspp, ATPS4rpp, CELBpts, CHTBSptspp, DHAPT, FRUpts2pp, FRUptspp, GALTptspp, GAMptspp, GLCptspp, MALTptspp, MANGLYCptspp, MANptspp, MNLptspp, SBTptspp, SUCptspp, TREptspp
9982	-49.5361	EX_succ_e	10.8056	-10	0.0694611	4	30.0575	-13.0428	25.8624	-3.81046	8.00562	b2104, b2415, b3732, b0842	2DGLCptspp, ACGAptspp, ACMANAptspp, ACMUMptspp, ARBTptspp, ASCBptspp, ATPS4rpp, CELBpts, CHTBSptspp, DHAPT, FRUpts2pp, FRUptspp, GALTptspp, GAMptspp, GLCptspp, HETZK, MALTptspp, MANGLYCptspp, MANptspp, MNLptspp, SBTptspp, SUCptspp, TREptspp
9983	-49.5361	EX_succ_e	10.8056	-10	0.0694611	4	30.0575	-13.0428	25.8624	-3.81046	8.00562	b2465, b0638, b2415, b3736	2DGLCptspp, ACGAptspp, ACMANAptspp, ACMUMptspp, ARBTptspp, ASCBptspp, ATPS4rpp, CELBpts, CHTBSptspp, DHAPT, FRUpts2pp, FRUptspp, GALTptspp, GAMptspp, GLCptspp, MALTptspp, MANGLYCptspp, MANptspp, MNLptspp, RZ5PP, SBTptspp, SUCptspp, TREptspp
9984	-49.5361	EX_succ_e	10.8056	-10	0.0694611	4	30.0575	-13.0428	25.8624	-3.81046	8.00562	b2415, b1377, b3736, b3367	2DGLCptspp, ACGAptspp, ACMANAptspp, ACMUMptspp, ARBTptspp, ASCBptspp, ATPS4rpp, CELBpts, CHTBSptspp, DHAPT, FRUpts2pp, FRUptspp, GALTptspp, GAMptspp, GLCptspp, MALTptspp, MANGLYCptspp, MANptspp, MNLptspp, SBTptspp, SUCptspp, TREptspp
9985	-49.5361	EX_succ_e	10.8056	-10	0.0694611	4	30.0575	-13.0428	25.8624	-3.81046	8.00562	b2415, b1329, b3738, b1022	2DGLCptspp, ACGAptspp, ACMANAptspp, ACMUMptspp, ARBTptspp, ASCBptspp, ATPS4rpp, CELBpts, CHTBSptspp, DHAPT, FRUpts2pp, FRUptspp, GALTptspp, GAMptspp, GLCptspp, MALTptspp, MANGLYCptspp, MANptspp, MNLptspp, PUACGAMS, PUACGAMtr, SBTptspp, SUCptspp, TREptspp
9986	-49.5361	EX_succ_e	10.8056	-10	0.0694611	4	30.0575	-13.0428	25.8624	-3.81046	8.00562	b2415, b3732, b3371, b1022	2DGLCptspp, ACGAptspp, ACMANAptspp, ACMUMptspp, ARBTptspp, ASCBptspp, ATPS4rpp, CELBpts, CHTBSptspp, DHAPT, FRULYSDG, FRUpts2pp, FRUptspp, GALTptspp, GAMptspp, GLCptspp, MALTptspp, MANGLYCptspp, MANptspp, MNLptspp, PUACGAMS, PUACGAMtr, SBTptspp, SUCptspp, TREptspp
9987	-49.5361	EX_succ_e	10.8056	-10	0.0694611	4	30.0575	-13.0428	25.8624	-3.81046	8.00562	b2415, b0067, b3732, b0875	2DGLCptspp, ACGAptspp, ACMANAptspp, ACMUMptspp, ARBTptspp, ASCBptspp, ATPS4rpp, CELBpts, CHTBSptspp, DHAPT, FRUpts2pp, FRUptspp, GALTptspp, GAMptspp, GLCptspp, MALTptspp, MANGLYCptspp, MANptspp, MNLptspp, SBTptspp, SUCptspp, THMabcpp, TREptspp
9988	-49.5361	EX_succ_e	10.8056	-10	0.0694611	4	30.0575	-13.0428	25.8624	-3.81046	8.00562	b2415, b1245, b3738, b1619	2DGLCptspp, ACGAptspp, ACMANAptspp, ACMUMptspp, ARBTptspp, ASCBptspp, ATPS4rpp, CELBpts, CHOLID, CHTBSptspp, DHAPT, FRUpts2pp, FRUptspp, GALTptspp, GAMptspp, GLCptspp, MALTptspp, MANGLYCptspp, MANptspp, MNLptspp, SBTptspp, SUCptspp, TREptspp
9989	-49.5361	EX_succ_e	10.8056	-10	0.0694611	4	30.0575	-13.0428	25.8624	-3.81046	8.00562	b2415, b3736, b3860, b4136	2DGLCptspp, ACGAptspp, ACMANAptspp, ACMUMptspp, ARBTptspp, ASCBptspp, ATPS4rpp, CELBpts, CHTBSptspp, DHAPT, DSBAO1, DSBAO2, DSBDR, FRUpts2pp, FRUptspp, GALTptspp, GAMptspp, GLCptspp, MALTptspp, MANGLYCptspp, MANptspp, MNLptspp, SBTptspp, SUCptspp, TDSR1, TDSR2, TREptspp
9990	-49.5361	EX_succ_e	10.8056	-10	0.0694611	4	30.0575	-13.0428	25.8624	-3.81046	8.00562	b1992, b2415, b3904, b3736	2DGLCptspp, ACGAptspp, ACMANAptspp, ACMUMptspp, ADOCBLS, ARBTptspp, ASCBptspp, ATPS4rpp, CELBpts, CHTBSptspp, DHAPT, FRUpts2pp, FRUptspp, GALTptspp, GAMptspp, GLCptspp, MALTptspp, MANGLYCptspp, MANptspp, MNLptspp, RMK, SBTptspp, SUCptspp, TREptspp
9991	-49.5361	EX_succ_e	10.8056	-10	0.0694611	4	30.0575	-13.0428	25.8624	-3.81046	8.00562	b2415, b2393, b3736, b1634	2DGLCptspp, ACGAptspp, ACMANAptspp, ACMUMptspp, ARBTptspp, ASCBptspp, ATPS4rpp, CELBpts, CHTBSptspp, DHAPT, FRUpts2pp, FRUptspp, GALTptspp, GAMptspp, GLCptspp, MALTptspp, MANGLYCptspp, MANptspp, MNLptspp, SBTptspp, SUCptspp, TREptspp
9992	-49.5361	EX_succ_e	10.8056	-10	0.0694611	4	30.0575	-13.0428	25.8624	-3.81046	8.00562	b2415, b3738, b0624, b3880	2DGLCptspp, ACGAptspp, ACMANAptspp, ACMUMptspp, ARBTptspp, ASCBptspp, ATPS4rpp, CELBpts, CHTBSptspp, DHAPT, FRUpts2pp, FRUptspp, Ftpp, GALTptspp, GAMptspp, GLCptspp, MALTptspp, MANGLYCptspp, MANptspp, MNLptspp, SBTptspp, SQVOSI, SUCptspp, TREptspp
9993	-49.5361	EX_succ_e	10.8056	-10	0.0694611	4	30.0575	-13.0428	25.8624	-3.81046	8.00562	b2415, b2483, b3736, b3856	2DGLCptspp, ACGAptspp, ACMANAptspp, ACMUMptspp, ARBTptspp, ASCBptspp, ATPS4rpp, CELBpts, CHTBSptspp, DHAPT, FRUpts2pp, FRUptspp, GALTptspp, GAMptspp, GLCptspp, MALTptspp, MANGLYCptspp, MANptspp, MNLptspp, SBTptspp, SUCptspp, TREptspp
9994	-49.5361	EX_succ_e	10.8056	-10	0.0694611	4	30.0575	-13.0428	25.8624	-3.81046	8.00562	b2415, b1033, b3732, b0124	2DGLCptspp, ACGAptspp, ACMANAptspp, ACMUMptspp, ARBTptspp, ASCBptspp, ATPS4rpp, CELBpts, CHTBSptspp, DHAPT, FRUpts2pp, FRUptspp, GALTptspp, GAMptspp, GLCptspp, MALTptspp, MANGLYCptspp, MANptspp, MNLptspp, SBTptspp, SUCptspp, TREptspp
9995	-49.5361	EX_succ_e	10.8056	-10	0.0694611	4	30.0575	-13.0428	25.8624	-3.81046	8.00562	b2036, b2415, b3738, b1193	2DGLCptspp, ACGAptspp, ACMANAptspp, ACMUMptspp, ARBTptspp, ASCBptspp, ATPS4rpp, CELBpts, CHTBSptspp, DHAPT, FRUpts2pp, FRUptspp, GALTptspp, GAMptspp, GLCptspp, MALTptspp, MANGLYCptspp, MANptspp, MNLptspp, SBTptspp, SUCptspp, TREptspp, UDPGALM
9996	-49.5361	EX_succ_e	10.8056	-10	0.0694611	4	30.0575	-13.0428	25.8624	-3.81046	8.00562	b2415, b3875, b3736, b2470	2DGLCptspp, ACGAptspp, ACMANAptspp, ACMUMptspp, ARBTptspp, ASCBptspp, ATPS4rpp, CELBpts, CHTBSptspp, DHAPT, DHPStex, FRUpts2pp, FRUptspp, GALTptspp, GAMptspp, GLCptspp, MALTptspp, MANGLYCptspp, MANptspp, MNLptspp, SBTptspp, SQtex, SUCptspp, TREptspp
9997	-49.5361	EX_succ_e	10.8056	-10	0.0694611	4	30.0575	-13.0428	25.8624	-3.81046	8.00562	b2415, b0347, b3732, b1484	2DGLCptspp, 3HCINNMH, 3HPPPNH, ACGAptspp, ACMANAptspp, ACMUMptspp, ARBTptspp, ASCBptspp, ATPS4rpp, CELBpts, CHTBSptspp, DHAPT, FRUpts2pp, FRUptspp, GALTptspp, GAMptspp, GLCptspp, MALTptspp, MANGLYCptspp, MANptspp, MNLptspp, SBTptspp, SUCptspp, TREptspp
9998	-49.5361	EX_succ_e	10.8056	-10	0.0694611	4	30.0575	-13.0428	25.8624	-3.81046	8.00562	b2415, b2800, b1646, b3732	2DGLCptspp, ACGAptspp, ACMANAptspp, ACMUMptspp, ARBTptspp, ASCBptspp, ATPS4rpp, CELBpts, CHTBSptspp, DHAPT, FRUpts2pp, FRUptspp, GALTptspp, GAMptspp, GLCptspp, MALTptspp, MANGLYCptspp, MANptspp, MNLptspp, SBTptspp, SPODMpp, SUCptspp, TREptspp
9999	-49.5361	EX_succ_e	10.8056	-10	0.0694611	4	30.0575	-13.0428	25.8624	-3.81046	8.00562	b2415, b2342, b3736, b1430	2DGLCptspp, ACGAptspp, ACMANAptspp, ACMUMptspp, ARBTptspp, ASCBptspp, ATPS4rpp, CELBpts, CHTBSptspp, DHAPT, FRUpts2pp, FRUptspp, GALTptspp, GAMptspp, GLCptspp, MALTptspp, MANGLYCptspp, MANptspp, MNLptspp, SBTptspp, SUCptspp, TEO2M, TREptspp
10000	-49.5361	EX_succ_e	10.8056	-10	0.0694611	4	30.0575	-13.0428	25.8624	-3.81046	8.00562	b3812, b2579, b2415, b3736	2DGLCptspp, ACGAptspp, ACMANAptspp, ACMUMptspp, ARBTptspp, ASCBptspp, ATPS4rpp, CELBpts, CHTBSptspp, DHAPT, FRUpts2pp, FRUptspp, GALTptspp, GAMptspp, GLCptspp, MALTptspp, MANGLYCptspp, MANptspp, MNLptspp, SBTptspp, SUCptspp, TREptspp

## Sheet: Removed duplicate reactions
Rank	Fitness Score	Product	Product flux (mmol/gDW/h	Substrate flux (mmol/gDW/h2	Maximal growth rate (1/h)	Nr of deletions	Minimal ISS at max growth (1e-4 USD/gDW/h)	Minimal ISS at 0 growth (1e-4 USD/gDW/h)	Economic SI at max growth (1e-4 USD/gDW/h)	Environmental SI at max growth (1e-4 USD/gDW/h)2	Social SI at max growth (1e-4 USD/gDW/h)	Gene deletions	Deleted reactions
9000	-50.5093	EX_succ_e	10.7987	-10	0.0688717	3	30.0307	-13.0428	25.8395	-3.80801	7.99912	b3846, b2415, b3738	2DGLCptspp, ACGAptspp, ACMANAptspp, ACMUMptspp, ARBTptspp, ASCBptspp, ATPS4rpp, CELBpts, CHTBSptspp, CTECOAI6, CTECOAI7, CTECOAI8, DHAPT, FRUpts2pp, FRUptspp, GALTptspp, GAMptspp, GLCptspp, MALTptspp, MANGLYCptspp, MANptspp, MNLptspp, SBTptspp, SUCptspp, TREptspp
9001	-50.5026	EX_succ_e	10.7971	-10	0.0687262	3	30.024	-13.0428	25.8339	-3.80741	7.99751	b0521, b2415, b3732	2DGLCptspp, ACGAptspp, ACMANAptspp, ACMUMptspp, ARBTptspp, ASCBptspp, ATPS4rpp, CBMKr, CELBpts, CHTBSptspp, DHAPT, FRUpts2pp, FRUptspp, GALTptspp, GAMptspp, GLCptspp, MALTptspp, MANGLYCptspp, MANptspp, MNLptspp, SBTptspp, SUCptspp, TREptspp
9003	-50.4972	EX_succ_e	10.7957	-10	0.068608	3	30.0186	-13.0428	25.8293	-3.80692	7.9962	b3844, b2415, b3732	2DGLCptspp, ACGAptspp, ACMANAptspp, ACMUMptspp, ARBTptspp, ASCBptspp, ATPS4rpp, CELBpts, CHTBSptspp, DHAPT, FADRx, FE3Ri, FLVRx, FRUpts2pp, FRUptspp, GALTptspp, GAMptspp, GLCptspp, MALTptspp, MANGLYCptspp, MANptspp, MNLptspp, SBTptspp, SUCptspp, TREptspp
9005	-50.4687	EX_succ_e	10.7785	-10	0.0671254	3	29.951	-12.9646	25.7719	-3.80078	7.97983	b4025, b1852, b3736	ATPS4rpp, G6PDH2r, PGI
9006	-50.4687	EX_succ_e	10.7785	-10	0.0671254	3	29.951	-12.9646	25.7719	-3.80078	7.97983	b2415, b1852, b3736	2DGLCptspp, ACGAptspp, ACMANAptspp, ACMUMptspp, ARBTptspp, ASCBptspp, ATPS4rpp, CELBpts, CHTBSptspp, DHAPT, FRUpts2pp, FRUptspp, G6PDH2r, GALTptspp, GAMptspp, GLCptspp, MALTptspp, MANGLYCptspp, MANptspp, MNLptspp, SBTptspp, SUCptspp, TREptspp
9007	-50.4687	EX_succ_e	10.7785	-10	0.0671254	3	29.951	-12.9646	25.7719	-3.80078	7.97983	b0767, b2415, b3732	2DGLCptspp, ACGAptspp, ACMANAptspp, ACMUMptspp, ARBTptspp, ASCBptspp, ATPS4rpp, CELBpts, CHTBSptspp, DHAPT, FRUpts2pp, FRUptspp, GALTptspp, GAMptspp, GLCptspp, MALTptspp, MANGLYCptspp, MANptspp, MNLptspp, PGL, SBTptspp, SUCptspp, TREptspp
9010	-50.4687	EX_succ_e	10.7785	-10	0.0671254	3	29.951	-12.9646	25.7719	-3.80078	7.97983	b2029, b2415, b3732	2DGLCptspp, ACGAptspp, ACMANAptspp, ACMUMptspp, ARBTptspp, ASCBptspp, ATPS4rpp, CELBpts, CHTBSptspp, DHAPT, FRUpts2pp, FRUptspp, GALTptspp, GAMptspp, GLCptspp, GND, MALTptspp, MANGLYCptspp, MANptspp, MNLptspp, SBTptspp, SUCptspp, TREptspp
9012	-50.4635	EX_succ_e	10.7872	-10	0.0693866	3	29.9849	-13.0428	25.8008	-3.80399	7.98808	b2415, b3736, b2413	2DGLCptspp, ACGAptspp, ACMANAptspp, ACMUMptspp, ARBTptspp, ASCBptspp, ATPS4rpp, CELBpts, CHTBSptspp, DHAPT, FRUpts2pp, FRUptspp, GALTptspp, GAMptspp, GLCptspp, MALTptspp, MANGLYCptspp, MANptspp, MNLptspp, SBTptspp, SO4t2pp, SUCptspp, TREptspp
9014	-50.4524	EX_succ_e	10.7843	-10	0.0676256	3	29.9738	-13.0428	25.7913	-3.80285	7.98536	b2415, b3732, b1695	2DGLCptspp, ACGAptspp, ACMANAptspp, ACMUMptspp, ACOAD1fr, ARBTptspp, ASCBptspp, ATPS4rpp, CELBpts, CHTBSptspp, DHAPT, FRUpts2pp, FRUptspp, GALTptspp, GAMptspp, GLCptspp, MALTptspp, MANGLYCptspp, MANptspp, MNLptspp, SBTptspp, SUCptspp, TREptspp
9016	-50.4524	EX_succ_e	10.7843	-10	0.0676256	3	29.9738	-13.0428	25.7913	-3.80285	7.98536	b2415, b3736, b0452	2DGLCptspp, ACGAptspp, ACMANAptspp, ACMUMptspp, ARBTptspp, ASCBptspp, ATPS4rpp, CELBpts, CHTBSptspp, DHAPT, FACOAE100, FACOAE120, FACOAE140, FACOAE141, FACOAE160, FACOAE161, FACOAE180, FACOAE181, FACOAE60, FACOAE80, FRUpts2pp, FRUptspp, GALTptspp, GAMptspp, GLCptspp, MALTptspp, MANGLYCptspp, MANptspp, MNLptspp, SBTptspp, SUCptspp, TREptspp
9017	-50.4524	EX_succ_e	10.7843	-10	0.0676256	3	29.9738	-13.0428	25.7913	-3.80285	7.98536	b2415, b3732, b0221	2DGLCptspp, ACGAptspp, ACMANAptspp, ACMUMptspp, ACOAD1f, ACOAD2f, ACOAD3f, ACOAD4f, ACOAD5f, ACOAD6f, ACOAD7f, ACOAD8f, ARBTptspp, ASCBptspp, ATPS4rpp, CELBpts, CHTBSptspp, DHAPT, FRUpts2pp, FRUptspp, GALTptspp, GAMptspp, GLCptspp, MALTptspp, MANGLYCptspp, MANptspp, MNLptspp, SBTptspp, SUCptspp, TREptspp
9019	-50.4524	EX_succ_e	10.7843	-10	0.0676257	3	29.9738	-13.0428	25.7913	-3.80284	7.98535	b2836, b2415, b3732	2AGPEAT120, 2AGPEAT140, 2AGPEAT141, 2AGPEAT160, 2AGPEAT161, 2AGPEAT180, 2AGPEAT181, 2AGPGAT120, 2AGPGAT140, 2AGPGAT141, 2AGPGAT160, 2AGPGAT161, 2AGPGAT180, 2AGPGAT181, 2DGLCptspp, AACPS1, AACPS2, AACPS3, AACPS4, AACPS5, AACPS6, AACPS7, AACPS8, AACPS9, ACGAptspp, ACMANAptspp, ACMUMptspp, ARBTptspp, ASCBptspp, ATPS4rpp, CELBpts, CHTBSptspp, DHAPT, FRUpts2pp, FRUptspp, GALTptspp, GAMptspp, GLCptspp,…
9022	-50.4487	EX_succ_e	10.7833	-10	0.0675436	3	29.9701	-13.0428	25.7881	-3.80251	7.98445	b2415, b4388, b3732	2DGLCptspp, ACGAptspp, ACMANAptspp, ACMUMptspp, ARBTptspp, ASCBptspp, ATPS4rpp, CELBpts, CHTBSptspp, DHAPT, FRUpts2pp, FRUptspp, GALTptspp, GAMptspp, GLCptspp, MALTptspp, MANGLYCptspp, MANptspp, MNLptspp, PSP_L, SBTptspp, SUCptspp, TREptspp
9023	-50.4487	EX_succ_e	10.7833	-10	0.0675436	3	29.9701	-13.0428	25.7881	-3.80251	7.98445	b2415, b2913, b3736	2DGLCptspp, ACGAptspp, ACMANAptspp, ACMUMptspp, AHGDx, ARBTptspp, ARHGDx, ASCBptspp, ATPS4rpp, CELBpts, CHTBSptspp, DHAPT, FRUpts2pp, FRUptspp, GALTptspp, GAMptspp, GLCptspp, MALTptspp, MANGLYCptspp, MANptspp, MNLptspp, PGCD, SBTptspp, SUCptspp, TREptspp
9024	-50.4487	EX_succ_e	10.7833	-10	0.0675435	3	29.9701	-13.0428	25.7881	-3.80251	7.98445	b0907, b2415, b3732	2DGLCptspp, ACGAptspp, ACMANAptspp, ACMUMptspp, ARBTptspp, ASCBptspp, ATPS4rpp, CELBpts, CHTBSptspp, DHAPT, FRUpts2pp, FRUptspp, GALTptspp, GAMptspp, GLCptspp, MALTptspp, MANGLYCptspp, MANptspp, MNLptspp, OHPBAT, PSERT, SBTptspp, SUCptspp, TREptspp
9025	-50.1869	EX_succ_e	10.3909	-10	0.0713224	7	30.372	-6.37027	25.9093	-3.60324	8.06601	b0894, b4025, b2988, b2428, b3063, b3736, b1380	ACM6PH, ATPS4rpp, DMSOR2, GSPMDA, GSPMDS, LDH_D, PGI, TARTRt7pp, TMAOR2
9026	-50.1869	EX_succ_e	10.3909	-10	0.0713224	7	30.372	-6.37027	25.9093	-3.60324	8.06601	b4025, b1238, b2888, b3736, b2253, b2552, b1380	ATPS4rpp, DURIK1, LDH_D, NODOx, NODOy, PGI, TMDK1, UDPKAAT, URATEtpp
9027	-50.1869	EX_succ_e	10.3909	-10	0.0713224	7	30.372	-6.37027	25.9093	-3.60324	8.06601	b4025, b3736, b3390, b4288, b4035, b1380, b0605	14GLUCANabcpp, ATPS4rpp, FE3DCITabcpp, LDH_D, MALTHXabcpp, MALTPTabcpp, MALTTRabcpp, MALTTTRabcpp, MALTabcpp, NADHPO, PGI
9028	-50.1869	EX_succ_e	10.3909	-10	0.0713224	7	30.372	-6.37027	25.9093	-3.60324	8.06601	b4025, b0517, b3061, b3736, b0197, b1380, b1388	ATPS4rpp, LDH_D, METDabcpp, METabcpp, PACCOAE, PGI, TARTD, URDGLYCD
9029	-50.1869	EX_succ_e	10.3909	-10	0.0713224	7	30.372	-6.37027	25.9093	-3.60324	8.06601	b4025, b0573, b3736, b4067, b1380, b1771, b3924	ACt4pp, AGt3, ALR2x, ATPS4rpp, CUt3, FLDR2, GLYCLTt4pp, LDH_D, PGI
9030	-50.1869	EX_succ_e	10.3909	-10	0.0713224	7	30.372	-6.37027	25.9093	-3.60324	8.06601	b4025, b2988, b3063, b3736, b3734, b3626, b1380	ATPS4rpp, GLCTR3, GSPMDA, GSPMDS, LDH_D, PGI, TARTRt7pp
9031	-49.6229	EX_succ_e	10.3909	-10	0.0713224	2	28.4133	-13.5807	24.4689	-3.66449	7.60885	b4025, b3733	ATPS4rpp, PGI
9036	-49.5368	EX_succ_e	10.8057	-10	0.0694603	4	30.0582	-13.0428	25.8629	-3.81052	8.00579	b1587, b2415, b3732, b0155	2DGLCptspp, ACGAptspp, ACMANAptspp, ACMUMptspp, ARBTptspp, ASCBptspp, ATPS4rpp, CELBpts, CHTBSptspp, CLt3_2pp, DHAPT, FRUpts2pp, FRUptspp, GALTptspp, GAMptspp, GLCptspp, MALTptspp, MANGLYCptspp, MANptspp, MNLptspp, SBTptspp, SELR, SUCptspp, TREptspp
9037	-49.5368	EX_succ_e	10.8057	-10	0.0694603	4	30.0582	-13.0428	25.8629	-3.81052	8.00579	b2415, b0383, b3736, b0155	2DGLCptspp, ACGAptspp, ACMANAptspp, ACMUMptspp, ACP1p, ARBTptspp, ASCBptspp, ATPS4rpp, CELBpts, CHTBSptspp, CLt3_2pp, DHAPT, FRUpts2pp, FRUptspp, GALTptspp, GAMptspp, GLCptspp, MALTptspp, MANGLYCptspp, MANptspp, MNLptspp, PPTHpp, SBTptspp, SUCptspp, TREptspp
9038	-49.5362	EX_succ_e	10.8056	-10	0.0694612	4	30.0576	-13.0428	25.8624	-3.81046	8.00564	b2415, b2223, b3732, b0353	2DGLCptspp, ACACt2pp, ACGAptspp, ACMANAptspp, ACMUMptspp, ARBTptspp, ASCBptspp, ATPS4rpp, BUTt2rpp, CELBpts, CHTBSptspp, DHAPT, FRUpts2pp, FRUptspp, GALTptspp, GAMptspp, GLCptspp, HCINNMt2rpp, HEXt2rpp, HPPPNt2rpp, MALTptspp, MANGLYCptspp, MANptspp, MNLptspp, SBTptspp, SUCptspp, TREptspp
9039	-49.5361	EX_succ_e	10.8056	-10	0.0694611	4	30.0575	-13.0428	25.8624	-3.81046	8.00562	b2415, b3736, b3631, b0662	2DGLCptspp, ACGAptspp, ACMANAptspp, ACMUMptspp, ARBTptspp, ASCBptspp, ATPS4rpp, CELBpts, CHTBSptspp, DHAPT, FRUpts2pp, FRUptspp, GALTptspp, GAMptspp, GLCTR1, GLCptspp, MALTptspp, MANGLYCptspp, MANptspp, MNLptspp, OMMBLHXy, SBTptspp, SUCptspp, TREptspp
9040	-49.5361	EX_succ_e	10.8056	-10	0.0694611	4	30.0575	-13.0428	25.8624	-3.81046	8.00562	b2415, b3732, b2129, b0830	2DGLCptspp, ACGAptspp, ACMANAptspp, ACMUMptspp, ARBTptspp, ASCBptspp, ATPS4rpp, CELBpts, CHLabcpp, CHTBSptspp, DHAPT, FRUpts2pp, FRUptspp, GALTptspp, GAMptspp, GLCptspp, GTHRDabcpp, MALTptspp, MANGLYCptspp, MANptspp, MNLptspp, SBTptspp, SUCptspp, TREptspp
9041	-49.5361	EX_succ_e	10.8056	-10	0.0694611	4	30.0575	-13.0428	25.8624	-3.81046	8.00562	b2415, b3736, b2914, b0404	2DGLCptspp, ACGAptspp, ACMANAptspp, ACMUMptspp, ARBTptspp, ASCBptspp, ATPS4rpp, CELBpts, CHTBSptspp, DHAPT, FA100ACPHi, FA120ACPHi, FA140ACPHi, FA141ACPHi, FA160ACPHi, FA161ACPHi, FA80ACPHi, FRUpts2pp, FRUptspp, GALTptspp, GAMptspp, GLCptspp, MALTptspp, MANGLYCptspp, MANptspp, MNLptspp, SBTptspp, SUCptspp, TREptspp
9042	-49.5361	EX_succ_e	10.8056	-10	0.0694611	4	30.0575	-13.0428	25.8624	-3.81046	8.00562	b2415, b3224, b3732, b0404	2DGLCptspp, ACGAptspp, ACMANAptspp, ACMUMptspp, ACNAMt2pp, ARBTptspp, ASCBptspp, ATPS4rpp, CELBpts, CHTBSptspp, DHAPT, FA100ACPHi, FA120ACPHi, FA140ACPHi, FA141ACPHi, FA160ACPHi, FA161ACPHi, FA80ACPHi, FRUpts2pp, FRUptspp, GALTptspp, GAMptspp, GLCptspp, MALTptspp, MANGLYCptspp, MANptspp, MNLptspp, SBTptspp, SUCptspp, TREptspp
9043	-49.5361	EX_succ_e	10.8056	-10	0.0694611	4	30.0575	-13.0428	25.8624	-3.81046	8.00562	b2415, b3738, b0404, b2794	2DGLCptspp, ACGAptspp, ACMANAptspp, ACMUMptspp, ARBTptspp, ASCBptspp, ATPS4rpp, CDGR, CELBpts, CHTBSptspp, DHAPT, FA100ACPHi, FA120ACPHi, FA140ACPHi, FA141ACPHi, FA160ACPHi, FA161ACPHi, FA80ACPHi, FRUpts2pp, FRUptspp, GALTptspp, GAMptspp, GLCptspp, MALTptspp, MANGLYCptspp, MANptspp, MNLptspp, SBTptspp, SUCptspp, TREptspp
9044	-49.5361	EX_succ_e	10.8056	-10	0.0694611	4	30.0575	-13.0428	25.8624	-3.81046	8.00562	b2415, b2261, b3736, b2927	2DGLCptspp, ACGAptspp, ACMANAptspp, ACMUMptspp, ARBTptspp, ASCBptspp, ATPS4rpp, CELBpts, CHTBSptspp, DHAPT, FRUpts2pp, FRUptspp, GALTptspp, GAMptspp, GLCptspp, MALTptspp, MANGLYCptspp, MANptspp, MNLptspp, SBTptspp, SUCBZS, SUCptspp, TREptspp
9045	-49.5361	EX_succ_e	10.8056	-10	0.0694611	4	30.0575	-13.0428	25.8624	-3.81046	8.00562	b2415, b3732, b2134, b2264	2DGLCptspp, ACGAptspp, ACMANAptspp, ACMUMptspp, ARBTptspp, ASCBptspp, ATPS4rpp, CELBpts, CHTBSptspp, DHAPT, FRUpts2pp, FRUptspp, GALTptspp, GAMptspp, GLCptspp, MALTptspp, MANGLYCptspp, MANptspp, MNLptspp, SBTptspp, SEPHCHCS, SUCptspp, TREptspp
9046	-49.5361	EX_succ_e	10.8056	-10	0.0694611	4	30.0575	-13.0428	25.8624	-3.81046	8.00562	b2415, b3736, b3735, b1686	2DGLCptspp, ACGAptspp, ACMANAptspp, ACMUMptspp, ARBTptspp, ASCBptspp, ATPS4rpp, CELBpts, CHTBSptspp, DHAPT, DHNCOAT, FRUpts2pp, FRUptspp, GALTptspp, GAMptspp, GLCptspp, MALTptspp, MANGLYCptspp, MANptspp, MNLptspp, SBTptspp, SUCptspp, TREptspp
9047	-49.5361	EX_succ_e	10.8056	-10	0.0694611	4	30.0575	-13.0428	25.8624	-3.81046	8.00562	b2415, b1805, b3732, b2262	2DGLCptspp, ACGAptspp, ACMANAptspp, ACMUMptspp, ARBTptspp, ASCBptspp, ATPS4rpp, CELBpts, CHTBSptspp, DHAPT, DHNCOAS, FRUpts2pp, FRUptspp, GALTptspp, GAMptspp, GLCptspp, MALTptspp, MANGLYCptspp, MANptspp, MNLptspp, SBTptspp, SUCptspp, TREptspp
9049	-49.5361	EX_succ_e	10.8056	-10	0.0694611	4	30.0575	-13.0428	25.8624	-3.81046	8.00562	b2415, b3736, b0451, b3930	2DGLCptspp, ACGAptspp, ACMANAptspp, ACMUMptspp, ARBTptspp, ASCBptspp, ATPS4rpp, CELBpts, CHTBSptspp, DHAPT, DHNAOT4, FRUpts2pp, FRUptspp, GALTptspp, GAMptspp, GLCptspp, MALTptspp, MANGLYCptspp, MANptspp, MNLptspp, SBTptspp, SUCptspp, TREptspp
9052	-49.5361	EX_succ_e	10.8056	-10	0.0694611	4	30.0575	-13.0428	25.8624	-3.81046	8.00562	b2415, b2261, b3736, b0613	2DGLCptspp, ACGAptspp, ACMANAptspp, ACMUMptspp, ARBTptspp, ASCBptspp, ATPS4rpp, CELBpts, CHTBSptspp, DHAPT, FRUpts2pp, FRUptspp, GALTptspp, GAMptspp, GLCptspp, MALTptspp, MANGLYCptspp, MANptspp, MNLptspp, SBTptspp, SUCBZS, SUCptspp, TPRDCOAS, TREptspp
9053	-49.5361	EX_succ_e	10.8056	-10	0.0694611	4	30.0575	-13.0428	25.8624	-3.81046	8.00562	b2415, b3736, b3860, b1686	2DGLCptspp, ACGAptspp, ACMANAptspp, ACMUMptspp, ARBTptspp, ASCBptspp, ATPS4rpp, CELBpts, CHTBSptspp, DHAPT, DHNCOAT, DSBAO1, DSBAO2, FRUpts2pp, FRUptspp, GALTptspp, GAMptspp, GLCptspp, MALTptspp, MANGLYCptspp, MANptspp, MNLptspp, SBTptspp, SUCptspp, TREptspp
9054	-49.5361	EX_succ_e	10.8056	-10	0.0694611	4	30.0575	-13.0428	25.8624	-3.81046	8.00562	b2502, b2415, b3732, b2263	2DGLCptspp, ACGAptspp, ACMANAptspp, ACMUMptspp, ARBTptspp, ASCBptspp, ATPS4rpp, CELBpts, CHTBSptspp, DHAPT, FRUpts2pp, FRUptspp, GALTptspp, GAMptspp, GLCptspp, MALTptspp, MANGLYCptspp, MANptspp, MNLptspp, SBTptspp, SHCHCS3, SUCptspp, TREptspp
9057	-49.5361	EX_succ_e	10.8056	-10	0.0694611	4	30.0575	-13.0428	25.8624	-3.81046	8.00562	b2415, b4131, b3736, b2260	2DGLCptspp, ACGAptspp, ACMANAptspp, ACMUMptspp, ARBTptspp, ASCBptspp, ATPS4rpp, CELBpts, CHTBSptspp, DHAPT, FRUpts2pp, FRUptspp, GALTptspp, GAMptspp, GLCptspp, MALTptspp, MANGLYCptspp, MANptspp, MNLptspp, SBTptspp, SUCBZL, SUCptspp, TREptspp
9060	-49.5361	EX_succ_e	10.8056	-10	0.0694611	4	30.0575	-13.0428	25.8624	-3.81046	8.00562	b2415, b3732, b1102, b1186	2DGLCptspp, ACGAptspp, ACMANAptspp, ACMUMptspp, ARBTptspp, ASCBptspp, ATPS4rpp, CELBpts, CHTBSptspp, CPGNtonex, DHAPT, FRUpts2pp, FRUptspp, GALTptspp, GAMptspp, GLCptspp, MALTptspp, MANGLYCptspp, MANptspp, MNLptspp, NAt3_1p5pp, SBTptspp, SUCptspp, TREptspp
9061	-49.5361	EX_succ_e	10.8056	-10	0.0694611	4	30.0575	-13.0428	25.8624	-3.81046	8.00562	b2415, b3732, b0197, b1528	2DGLCptspp, ACGAptspp, ACMANAptspp, ACMUMptspp, ARBTptspp, ARBt3ipp, ASCBptspp, ATPS4rpp, CELBpts, CHTBSptspp, DHAPT, FRUpts2pp, FRUptspp, GALTptspp, GAMptspp, GLCptspp, MALTptspp, MANGLYCptspp, MANptspp, MELIBt3ipp, METDabcpp, METabcpp, MNLptspp, SBTptspp, SUCptspp, TREptspp
9062	-49.5361	EX_succ_e	10.8056	-10	0.0694611	4	30.0575	-13.0428	25.8624	-3.81046	8.00562	b2415, b3738, b3451, b0009	2DGLCptspp, ACGAptspp, ACMANAptspp, ACMUMptspp, ARBTptspp, ASCBptspp, ATPS4rpp, CELBpts, CHTBSptspp, DHAPT, FRUpts2pp, FRUptspp, G3PCabcpp, G3PEabcpp, G3PGabcpp, G3PIabcpp, G3PSabcpp, GALTptspp, GAMptspp, GLCptspp, GLYC2Pabcpp, GLYC3Pabcpp, MALTptspp, MANGLYCptspp, MANptspp, MNLptspp, MPTAT, SBTptspp, SUCptspp, TREptspp
9063	-49.5361	EX_succ_e	10.8056	-10	0.0694611	4	30.0575	-13.0428	25.8624	-3.81046	8.00562	b2415, b0674, b1291, b3736	2DGLCptspp, ACGAptspp, ACMANAptspp, ACMUMptspp, ARBTptspp, ASCBptspp, ASNS1, ATPS4rpp, CELBpts, CHTBSptspp, DHAPT, FRUpts2pp, FRUptspp, GALTptspp, GAMptspp, GLCptspp, MALTptspp, MANGLYCptspp, MANptspp, MNLptspp, SBTptspp, SUCptspp, TREptspp
9065	-49.5361	EX_succ_e	10.8056	-10	0.0694611	4	30.0575	-13.0428	25.8624	-3.81046	8.00562	b2415, b3736, b1539, b0118	2DGLCptspp, ACGAptspp, ACMANAptspp, ACMUMptspp, ARBTptspp, ASCBptspp, ATHRDHr, ATPS4rpp, CELBpts, CHTBSptspp, DHAPT, DSERDHr, FRUpts2pp, FRUptspp, GALTptspp, GAMptspp, GLCptspp, LSERDHr, MALTptspp, MANGLYCptspp, MANptspp, MICITDr, MNLptspp, SBTptspp, SUCptspp, TREptspp
9066	-49.5361	EX_succ_e	10.8056	-10	0.0694611	4	30.0575	-13.0428	25.8624	-3.81046	8.00562	b2415, b1872, b3736, b1533	2DGLCptspp, ACGAptspp, ACMANAptspp, ACMUMptspp, ARBTptspp, ASCBptspp, ATPS4rpp, CELBpts, CHTBSptspp, DHAPT, DMSOR1pp, DMSOR2pp, FRUpts2pp, FRUptspp, GALTptspp, GAMptspp, GLCptspp, MALTptspp, MANGLYCptspp, MANptspp, MNLptspp, SBTptspp, SERtpp, SUCptspp, TREptspp
9067	-49.5361	EX_succ_e	10.8056	-10	0.0694611	4	30.0575	-13.0428	25.8624	-3.81046	8.00562	b2415, b3736, b1900, b1090	2DGLCptspp, ACGAptspp, ACMANAptspp, ACMUMptspp, ACPPAT120, ACPPAT140, ACPPAT141, ACPPAT160, ACPPAT161, ACPPAT180, ACPPAT181, ARBTptspp, ARBabcpp, ASCBptspp, ATPS4rpp, CELBpts, CHTBSptspp, DHAPT, FRUpts2pp, FRUptspp, GALTptspp, GAMptspp, GLCptspp, MALTptspp, MANGLYCptspp, MANptspp, MNLptspp, SBTptspp, SUCptspp, TREptspp
9068	-49.5361	EX_succ_e	10.8056	-10	0.0694611	4	30.0575	-13.0428	25.8624	-3.81046	8.00562	b1590, b2415, b3732, b4036	14GLUCANtexi, 2DGLCptspp, ACGAptspp, ACMANAptspp, ACMUMptspp, ARBTptspp, ASCBptspp, ATPS4rpp, CELBpts, CHTBSptspp, DHAPT, FRUpts2pp, FRUptspp, GALTptspp, GAMptspp, GLCptspp, GLCtex_copy1, MALTHXtexi, MALTPTtexi, MALTTRtexi, MALTTTRtexi, MALTptspp, MALTtexi, MANGLYCptspp, MANptspp, MNLptspp, SBTptspp, SELR, SUCptspp, TREptspp
9069	-49.5361	EX_succ_e	10.8056	-10	0.0694611	4	30.0575	-13.0428	25.8624	-3.81046	8.00562	b2415, b3732, b4036, b3001	14GLUCANtexi, 2DGLCptspp, ACGAptspp, ACMANAptspp, ACMUMptspp, ARBTptspp, ASCBptspp, ATPS4rpp, CELBpts, CHTBSptspp, DHAPT, FRUpts2pp, FRUptspp, GALTptspp, GAMptspp, GLCptspp, GLCtex_copy1, MALTHXtexi, MALTPTtexi, MALTTRtexi, MALTTTRtexi, MALTptspp, MALTtexi, MANGLYCptspp, MANptspp, MNLptspp, SBTptspp, SUCptspp, TREptspp
9073	-49.5361	EX_succ_e	10.8056	-10	0.0694611	4	30.0575	-13.0428	25.8624	-3.81046	8.00562	b3752, b2407, b2415, b3736	2DGLCptspp, ACGAptspp, ACMANAptspp, ACMUMptspp, ARBTptspp, ASCBptspp, ATPS4rpp, CELBpts, CHTBSptspp, DHAPT, FRUpts2pp, FRUptspp, GALTptspp, GAMptspp, GLCptspp, MALTptspp, MANGLYCptspp, MANptspp, MNLptspp, PUNP7, RBK, SBTptspp, SUCptspp, TREptspp
9074	-49.5361	EX_succ_e	10.8056	-10	0.0694611	4	30.0575	-13.0428	25.8624	-3.81046	8.00562	b2415, b3736, b1015, b0724	2DGLCptspp, ACGAptspp, ACMANAptspp, ACMUMptspp, ARBTptspp, ASCBptspp, ATPS4rpp, CELBpts, CHTBSptspp, DHAPT, FRUpts2pp, FRUptspp, GALTptspp, GAMptspp, GLCptspp, MALTptspp, MANGLYCptspp, MANptspp, MNLptspp, PPAt4pp, PROt4pp, SBTptspp, SUCDi, SUCptspp, TREptspp
9075	-49.5361	EX_succ_e	10.8056	-10	0.0694611	4	30.0575	-13.0428	25.8624	-3.81046	8.00562	b3916, b3091, b2415, b3732	2DGLCptspp, ACGAptspp, ACMANAptspp, ACMUMptspp, ALTRH, ARBTptspp, ASCBptspp, ATPS4rpp, CELBpts, CHTBSptspp, DHAPT, FRUpts2pp, FRUptspp, GALTptspp, GAMptspp, GLCptspp, MALTptspp, MANGLYCptspp, MANptspp, MNLptspp, PFK_2, PFK_3, SBTptspp, SUCptspp, TREptspp
9076	-49.5361	EX_succ_e	10.8056	-10	0.0694611	4	30.0575	-13.0428	25.8624	-3.81046	8.00562	b2415, b3453, b3738, b3241	2DGLCptspp, 4HBZt3pp, ACGAptspp, ACMANAptspp, ACMUMptspp, ARBTptspp, ASCBptspp, ATPS4rpp, CELBpts, CHTBSptspp, DHAPT, FRUpts2pp, FRUptspp, G3PCabcpp, G3PEabcpp, G3PGabcpp, G3PIabcpp, G3PSabcpp, GALTptspp, GAMptspp, GLCptspp, GLYC2Pabcpp, GLYC3Pabcpp, MALTptspp, MANGLYCptspp, MANptspp, MNLptspp, SBTptspp, SUCptspp, TREptspp
9077	-49.5361	EX_succ_e	10.8056	-10	0.0694611	4	30.0575	-13.0428	25.8624	-3.81046	8.00562	b2415, b1064, b3732, b3453	2DGLCptspp, ACGAptspp, ACMANAptspp, ACMUMptspp, ARBTptspp, ASCBptspp, ASR, ATPS4rpp, CELBpts, CHTBSptspp, DHAPT, FRUpts2pp, FRUptspp, G3PCabcpp, G3PEabcpp, G3PGabcpp, G3PIabcpp, G3PSabcpp, GALTptspp, GAMptspp, GLCptspp, GLYC2Pabcpp, GLYC3Pabcpp, MALTptspp, MANGLYCptspp, MANptspp, MNLptspp, SBTptspp, SUCptspp, TREptspp
9078	-49.5361	EX_succ_e	10.8056	-10	0.0694611	4	30.0575	-13.0428	25.8624	-3.81046	8.00562	b2415, b3736, b3451, b1008	2DGLCptspp, ACGAptspp, ACMANAptspp, ACMUMptspp, ARBTptspp, ASCBptspp, ATPS4rpp, CELBpts, CHTBSptspp, DHAPT, FRUpts2pp, FRUptspp, G3PCabcpp, G3PEabcpp, G3PGabcpp, G3PIabcpp, G3PSabcpp, GALTptspp, GAMptspp, GLCptspp, GLYC2Pabcpp, GLYC3Pabcpp, MALTptspp, MANGLYCptspp, MANptspp, MNLptspp, SBTptspp, SUCptspp, TREptspp
9079	-49.5361	EX_succ_e	10.8056	-10	0.0694611	4	30.0575	-13.0428	25.8624	-3.81046	8.00562	b2415, b3736, b3450, b0353	2DGLCptspp, ACGAptspp, ACMANAptspp, ACMUMptspp, ARBTptspp, ASCBptspp, ATPS4rpp, CELBpts, CHTBSptspp, DHAPT, FRUpts2pp, FRUptspp, G3PCabcpp, G3PEabcpp, G3PGabcpp, G3PIabcpp, G3PSabcpp, GALTptspp, GAMptspp, GLCptspp, GLYC2Pabcpp, GLYC3Pabcpp, HCINNMt2rpp, HPPPNt2rpp, MALTptspp, MANGLYCptspp, MANptspp, MNLptspp, SBTptspp, SUCptspp, TREptspp
9080	-49.5361	EX_succ_e	10.8056	-10	0.0694611	4	30.0575	-13.0428	25.8624	-3.81046	8.00562	b2415, b3738, b3451, b2344	2DGLCptspp, ACGAptspp, ACMANAptspp, ACMUMptspp, ARBTptspp, ASCBptspp, ATPS4rpp, CELBpts, CHTBSptspp, DDCAtexi, DHAPT, FRUpts2pp, FRUptspp, G3PCabcpp, G3PEabcpp, G3PGabcpp, G3PIabcpp, G3PSabcpp, GALTptspp, GAMptspp, GLCptspp, GLYC2Pabcpp, GLYC3Pabcpp, HDCAtexi, HDCEAtexi, MALTptspp, MANGLYCptspp, MANptspp, MNLptspp, OCDCAtexi, OCDCEAtexi, SBTptspp, SUCptspp, TREptspp, TTDCAtexi, TTDCEAtexi
9081	-49.5361	EX_succ_e	10.8056	-10	0.0694611	4	30.0575	-13.0428	25.8624	-3.81046	8.00562	b2415, b3224, b3453, b3738	2DGLCptspp, ACGAptspp, ACMANAptspp, ACMUMptspp, ACNAMt2pp, ARBTptspp, ASCBptspp, ATPS4rpp, CELBpts, CHTBSptspp, DHAPT, FRUpts2pp, FRUptspp, G3PCabcpp, G3PEabcpp, G3PGabcpp, G3PIabcpp, G3PSabcpp, GALTptspp, GAMptspp, GLCptspp, GLYC2Pabcpp, GLYC3Pabcpp, MALTptspp, MANGLYCptspp, MANptspp, MNLptspp, SBTptspp, SUCptspp, TREptspp
9084	-49.5361	EX_succ_e	10.8056	-10	0.0694611	4	30.0575	-13.0428	25.8624	-3.81046	8.00562	b1398, b2415, b3732, b4020	2DGLCptspp, ACGAptspp, ACMANAptspp, ACMUMptspp, ARBTptspp, ASCBptspp, ATPS4rpp, CELBpts, CHTBSptspp, DHAPT, FRUpts2pp, FRUptspp, GALTptspp, GAMptspp, GLCptspp, MALTptspp, MANGLYCptspp, MANptspp, MNLptspp, PACCOAL, PItpp, SBTptspp, SUCptspp, TREptspp
9085	-49.5361	EX_succ_e	10.8056	-10	0.0694611	4	30.0575	-13.0428	25.8624	-3.81046	8.00562	b0894, b2415, b0104, b3736	2DGLCptspp, ACGAptspp, ACMANAptspp, ACMUMptspp, ARBTptspp, ASCBptspp, ATPS4rpp, CELBpts, CHTBSptspp, DHAPT, DMSOR2, FRUpts2pp, FRUptspp, GALTptspp, GAMptspp, GLCptspp, GMPR, MALTptspp, MANGLYCptspp, MANptspp, MNLptspp, SBTptspp, SUCptspp, TMAOR2, TREptspp
9086	-49.5361	EX_succ_e	10.8056	-10	0.0694611	4	30.0575	-13.0428	25.8624	-3.81046	8.00562	b2415, b0104, b3517, b3738	2DGLCptspp, ACGAptspp, ACMANAptspp, ACMUMptspp, ARBTptspp, ASCBptspp, ATPS4rpp, CELBpts, CHTBSptspp, DHAPT, FRUpts2pp, FRUptspp, GALTptspp, GAMptspp, GLCptspp, GMPR, MALTptspp, MANGLYCptspp, MANptspp, MNLptspp, SBTptspp, SUCptspp, TREptspp
9087	-49.5361	EX_succ_e	10.8056	-10	0.0694611	4	30.0575	-13.0428	25.8624	-3.81046	8.00562	b3903, b2415, b3732, b3662	2DGLCptspp, ACGAptspp, ACMANAptspp, ACMUMptspp, ARBTptspp, ASCBptspp, ATPS4rpp, CELBpts, CHTBSptspp, DHAPT, FRUpts2pp, FRUptspp, GALTptspp, GAMptspp, GLCptspp, GSNt3pp, INSt3pp, LYXI, MALTptspp, MANGLYCptspp, MANptspp, MNLptspp, RMI, SBTptspp, SUCptspp, TREptspp
9088	-49.5361	EX_succ_e	10.8056	-10	0.0694611	4	30.0575	-13.0428	25.8624	-3.81046	8.00562	b2415, b3732, b1492, b1185	2DGLCptspp, ACGAptspp, ACMANAptspp, ACMUMptspp, ARBTptspp, ASCBptspp, ATPS4rpp, CELBpts, CHTBSptspp, DHAPT, DSBAO1, DSBAO2, FRUpts2pp, FRUptspp, GALTptspp, GAMptspp, GLCptspp, GLUABUTt7pp, MALTptspp, MANGLYCptspp, MANptspp, MNLptspp, SBTptspp, SUCptspp, TREptspp
9089	-49.5361	EX_succ_e	10.8056	-10	0.0694611	4	30.0575	-13.0428	25.8624	-3.81046	8.00562	b2415, b2307, b3736, b3370	2DGLCptspp, ACGAptspp, ACMANAptspp, ACMUMptspp, ARBTptspp, ASCBptspp, ATPS4rpp, CELBpts, CHTBSptspp, DHAPT, FRULYSt2pp, FRUpts2pp, FRUptspp, GALTptspp, GAMptspp, GLCptspp, HISabcpp, LYSabcpp, MALTptspp, MANGLYCptspp, MANptspp, MNLptspp, ORNabcpp, PSCLYSt2pp, SBTptspp, SUCptspp, TREptspp
9090	-49.5361	EX_succ_e	10.8056	-10	0.0694611	4	30.0575	-13.0428	25.8624	-3.81046	8.00562	b2415, b2307, b3738, b1619	2DGLCptspp, ACGAptspp, ACMANAptspp, ACMUMptspp, ARBTptspp, ASCBptspp, ATPS4rpp, CELBpts, CHOLID, CHTBSptspp, DHAPT, FRUpts2pp, FRUptspp, GALTptspp, GAMptspp, GLCptspp, HISabcpp, LYSabcpp, MALTptspp, MANGLYCptspp, MANptspp, MNLptspp, ORNabcpp, SBTptspp, SUCptspp, TREptspp
9091	-49.5361	EX_succ_e	10.8056	-10	0.0694611	4	30.0575	-13.0428	25.8624	-3.81046	8.00562	b3670, b2415, b2307, b3738	2DGLCptspp, ACGAptspp, ACMANAptspp, ACMUMptspp, ARBTptspp, ASCBptspp, ATPS4rpp, CELBpts, CHTBSptspp, DHAPT, FRUpts2pp, FRUptspp, GALTptspp, GAMptspp, GLCptspp, HISabcpp, LYSabcpp, MALTptspp, MANGLYCptspp, MANptspp, MNLptspp, ORNabcpp, SBTptspp, SUCptspp, TREptspp
9094	-49.5361	EX_succ_e	10.8056	-10	0.0694611	4	30.0575	-13.0428	25.8624	-3.81046	8.00562	b2415, b4381, b3736, b3732	2DGLCptspp, ACGAptspp, ACMANAptspp, ACMUMptspp, ARBTptspp, ASCBptspp, ATPS4rpp, CELBpts, CHTBSptspp, DHAPT, DRPA, FRUpts2pp, FRUptspp, GALTptspp, GAMptspp, GLCptspp, MALTptspp, MANGLYCptspp, MANptspp, MNLptspp, SBTptspp, SUCptspp, TREptspp
9096	-49.5361	EX_succ_e	10.8056	-10	0.0694611	4	30.0575	-13.0428	25.8624	-3.81046	8.00562	b2415, b2705, b4381, b3732	2DGLCptspp, ACGAptspp, ACMANAptspp, ACMUMptspp, ARBTptspp, ASCBptspp, ATPS4rpp, CELBpts, CHTBSptspp, DHAPT, DRPA, FRUpts2pp, FRUptspp, GALTptspp, GAMptspp, GLCptspp, MALTptspp, MANGLYCptspp, MANptspp, MNLptspp, SBTPD, SBTptspp, SUCptspp, TREptspp
9097	-49.5361	EX_succ_e	10.8056	-10	0.0694611	4	30.0575	-13.0428	25.8624	-3.81046	8.00562	b3417, b2415, b3732, b0336	2DGLCptspp, ACGAptspp, ACMANAptspp, ACMUMptspp, ARBTptspp, ASCBptspp, ATPS4rpp, CELBpts, CHTBSptspp, CSNt2pp, DHAPT, FRUpts2pp, FRUptspp, GALTptspp, GAMptspp, GLCptspp, MALTptspp, MANGLYCptspp, MANptspp, MLTP1, MLTP2, MLTP3, MNLptspp, SBTptspp, SUCptspp, TREptspp
9098	-49.5361	EX_succ_e	10.8056	-10	0.0694611	4	30.0575	-13.0428	25.8624	-3.81046	8.00562	b3417, b2415, b2918, b3732	2DGLCptspp, ACGAptspp, ACMANAptspp, ACMUMptspp, ARBTptspp, ASCBptspp, ATPS4rpp, CELBpts, CHTBSptspp, DHAPT, FRUpts2pp, FRUptspp, GALTptspp, GAMptspp, GLCptspp, MALTptspp, MANGLYCptspp, MANptspp, MLTP1, MLTP2, MLTP3, MNLptspp, SBTptspp, SUCptspp, TREptspp
9099	-49.5361	EX_succ_e	10.8056	-10	0.0694611	4	30.0575	-13.0428	25.8624	-3.81046	8.00562	b3417, b2415, b2538, b3736	2DGLCptspp, ACGAptspp, ACMANAptspp, ACMUMptspp, ARBTptspp, ASCBptspp, ATPS4rpp, CELBpts, CHTBSptspp, CINNDO, DHAPT, FRUpts2pp, FRUptspp, GALTptspp, GAMptspp, GLCptspp, MALTptspp, MANGLYCptspp, MANptspp, MLTP1, MLTP2, MLTP3, MNLptspp, PPPNDO, SBTptspp, SUCptspp, TREptspp
9100	-49.5361	EX_succ_e	10.8056	-10	0.0694611	4	30.0575	-13.0428	25.8624	-3.81046	8.00562	b2415, b4055, b3738, b4242	2DGLCptspp, ACGAptspp, ACMANAptspp, ACMUMptspp, ARBTptspp, ASCBptspp, ATPS4rpp, CELBpts, CHTBSptspp, DHAPT, FRUpts2pp, FRUptspp, GALTptspp, GAMptspp, GLCptspp, MALTptspp, MANGLYCptspp, MANptspp, MG2uabcpp, MNLptspp, SBTptspp, SUCptspp, TREptspp, TYRPpp
9101	-49.5361	EX_succ_e	10.8056	-10	0.0694611	4	30.0575	-13.0428	25.8624	-3.81046	8.00562	b0678, b2415, b0677, b3736	2DGLCptspp, ACGAptspp, ACMANAptspp, ACMUMptspp, AGDC, ARBTptspp, ASCBptspp, ATPS4rpp, CELBpts, CHTBSptspp, DHAPT, FRUpts2pp, FRUptspp, G6PDA, GALTptspp, GAMptspp, GLCptspp, MALTptspp, MANGLYCptspp, MANptspp, MNLptspp, SBTptspp, SUCptspp, TREptspp
9102	-49.5361	EX_succ_e	10.8056	-10	0.0694611	4	30.0575	-13.0428	25.8624	-3.81046	8.00562	b2415, b0596, b3732, b1599	2DGLCptspp, ACGAptspp, ACMANAptspp, ACMUMptspp, ARBTptspp, ASCBptspp, ATPS4rpp, CELBpts, CHTBSptspp, DHAPT, DHBD, FRUpts2pp, FRUptspp, GALTptspp, GAMptspp, GLCptspp, MALTptspp, MANGLYCptspp, MANptspp, MNLptspp, SBTptspp, SPMDt3pp, SUCptspp, TREptspp
9103	-49.5361	EX_succ_e	10.8056	-10	0.0694611	4	30.0575	-13.0428	25.8624	-3.81046	8.00562	b2415, b3565, b3732, b3572	2DGLCptspp, ACGAptspp, ACMANAptspp, ACMUMptspp, ARBTptspp, ASCBptspp, ATPS4rpp, CELBpts, CHTBSptspp, DHAPT, FRUpts2pp, FRUptspp, GALTptspp, GAMptspp, GLCptspp, MALTptspp, MANGLYCptspp, MANptspp, MNLptspp, SBTptspp, SUCptspp, TREptspp, VPAMTr, XYLI1, XYLI2
9104	-49.5361	EX_succ_e	10.8056	-10	0.0694611	4	30.0575	-13.0428	25.8624	-3.81046	8.00562	b2415, b1917, b3732, b1285	2DGLCptspp, ACGAptspp, ACMANAptspp, ACMUMptspp, ARBTptspp, ASCBptspp, ATPS4rpp, CELBpts, CHTBSptspp, CYSabcpp, DHAPT, FRUpts2pp, FRUptspp, GALTptspp, GAMptspp, GLCptspp, LDGUNPD, MALTptspp, MANGLYCptspp, MANptspp, MNLptspp, SBTptspp, SUCptspp, TREptspp
9105	-49.5361	EX_succ_e	10.8056	-10	0.0694611	4	30.0575	-13.0428	25.8624	-3.81046	8.00562	b3416, b2415, b3737, b0728	2DGLCptspp, ACGAptspp, ACMANAptspp, ACMUMptspp, AMALT1, AMALT2, AMALT3, AMALT4, ARBTptspp, ASCBptspp, ATPS4rpp, CELBpts, CHTBSptspp, DHAPT, FRUpts2pp, FRUptspp, GALTptspp, GAMptspp, GLCptspp, MALTptspp, MANGLYCptspp, MANptspp, MNLptspp, SBTptspp, SUCOAS, SUCptspp, TREptspp
9106	-49.5361	EX_succ_e	10.8056	-10	0.0694611	4	30.0575	-13.0428	25.8624	-3.81046	8.00562	b4025, b2415, b3736, b3625	2DGLCptspp, ACGAptspp, ACMANAptspp, ACMUMptspp, ARBTptspp, ASCBptspp, ATPS4rpp, CELBpts, CHTBSptspp, DHAPT, FRUpts2pp, FRUptspp, GALTptspp, GAMptspp, GLCptspp, HEPK2, MALTptspp, MANGLYCptspp, MANptspp, MNLptspp, PGI, SBTptspp, SUCptspp, TREptspp
9107	-49.5361	EX_succ_e	10.8056	-10	0.0694611	4	30.0575	-13.0428	25.8624	-3.81046	8.00562	b3124, b2415, b3738, b3894	2DGLCptspp, ACGAptspp, ACMANAptspp, ACMUMptspp, ARBTptspp, ASCBptspp, ATPS4rpp, CELBpts, CHTBSptspp, DHAPT, FRUpts2pp, FRUptspp, GALTptspp, GAMptspp, GLCptspp, GLYCK2, MALTptspp, MANGLYCptspp, MANptspp, MNLptspp, SBTptspp, SUCptspp, TREptspp
9108	-49.5361	EX_succ_e	10.8056	-10	0.0694611	4	30.0575	-13.0428	25.8624	-3.81046	8.00562	b2415, b2210, b3736, b0307	2DGLCptspp, ACGAptspp, ACMANAptspp, ACMUMptspp, ARBTptspp, ASCBptspp, ATPS4rpp, CELBpts, CHTBSptspp, DHAPT, FRUpts2pp, FRUptspp, GALTptspp, GAMptspp, GLCptspp, MALTptspp, MANGLYCptspp, MANptspp, MDH2, MDH3, MNLptspp, SBTptspp, SUCptspp, TREptspp
9109	-49.5361	EX_succ_e	10.8056	-10	0.0694611	4	30.0575	-13.0428	25.8624	-3.81046	8.00562	b2415, b2210, b3736, b0613	2DGLCptspp, ACGAptspp, ACMANAptspp, ACMUMptspp, ARBTptspp, ASCBptspp, ATPS4rpp, CELBpts, CHTBSptspp, DHAPT, FRUpts2pp, FRUptspp, GALTptspp, GAMptspp, GLCptspp, MALTptspp, MANGLYCptspp, MANptspp, MDH2, MDH3, MNLptspp, SBTptspp, SUCptspp, TPRDCOAS, TREptspp
[truncated: 421 more rows]
